# Supplementary material for: Distinctive features of lincRNA gene expression suggest widespread RNA-independent functions
Source: Life Sci Alliance. 2018 Jul 31;1(4):e201800124. doi: 10.26508/lsa.201800124 (PMC6238598; doi:10.26508/lsa.201800124)
Supplement: Supplementary file 1 [file LSA-2018-00124_TableS1.xlsx]

## Sheet: Table S1A mRNA lincRNA database
	bulk RNA-seq lincRNA defintions with cuffmerge (based on Ensembl/Necsulea/Guttman annotations and our own RNA-seq data)					Gene filters and properties for genes defined from bulk RNA-seq								Bulk RNA-seq analysis of mESC to NPC differentiation										CRAC analysis of RNA stability and transcription termination					Expression and variability defined by single-cell RNA-seq (based on Ensembl/Necsulea/Guttman annotations, without using our bulk RNA-seq for ab initio transcript definitions)
	Annotations derived from cuffmerge analysis (de novo assembly of bulk RNA-seq, Ensembl, Necsulea and Guttman datasets)													RNA normalised counts from bulk RNA-seq (ES to NPC differentiation)										CRAC and NET-seq analysis						Descriptive gene name	Single cell RNA-seq expression/variability
Raw column name:	cuffmerge.gene_id	chr	start	end	strand	biotype	XLOC.XLOC.overlap.biotypes	filter.no.classical.overlap	high.quality.biotype	exonic.length	repeat.overlap	TE	lncRScan	063_counts	064_counts	065_counts	066_counts	067_counts	068_counts	069_counts	070_counts	071_counts	072_counts	CRAC.XLOCs.HQ	CRAC.biotype	Mtr4.exon	NETseq.exon	Mtr4.sensePROMPT	NETseq.sensePROMPT	gene_id	Ensembl.Necsulea.Guttman.biotype	mean_expr_065	DM_065	mean_expr_071	DM_071
Friendly column name (see key):	gene_id	chromosome	start	end	strand	ensembl_biotype	overlap_with_other_features	overlap_with_classical_Ensembl_features	high_quality_biotype (used for bulk RNA-seq analysis)	total_exon_length	total_repeat_overlap	translation_efficiency	coding_vs_noncoding_computational_prediction	CB9_2i	BC8_2i	BC8_serumLIF	CB9_serumLIF	BC8_NPCs_day3	CB9_NPCs_day3	BC8_NPCs_day6	CB9_NPCs_day6	BC8_NPCs_day8	CB9_NPCs_day8	High_quality_transcripts_included_in_CRAC_analysis	Biotype_used_for_CRAC_analysis	Mtr4_CRAC_signal_in_exons	PolII_NETseq_signal_in_exons	Mtr4_CRAC_signal_in_PROMPT_regions	PolII_NETseq_signal_in_PROMPT_regions	gene_id_in_reference_annotations_used_for_scRNAseq_analysis	biotype_in_reference_annotations_used_for_scRNAseq_analysis	mean_expression_in_BC8_mESCs_in_serumLIF	Distance_to_the_median_in_BC8_mESCs_in_serumLIF	mean_expression_in_BC8_NPCs_day8	Distance_to_the_median_in_BC8_NPCs_day8
	XLOC_000001	1	3054232	3054733	+	unprocessed_pseudogene	NA	FALSE	none	501	438	NA	protein_coding	1.83292	2.32068	0.88799	0	1.04064	0	0	0	1.9041	0	no	NA	NA	NA	NA	NA	ENSMUSG00000090025	unprocessed_pseudogene	NA	NA	NA	NA
	XLOC_000002	1	3072726	3074402	+	lncRNA	NA	TRUE	none	263	35	NA	lncRNA	0	0	0	0	0	0	0	0	0	0	no	NA	NA	NA	NA	NA	Necsulea_CUFF.124394	lncRNA	NA	NA	NA	NA
	XLOC_000003	1	3102015	3102125	+	snRNA	NA	FALSE	none	110	84	NA	lncRNA	0	0	0	0	0	0	0	0	0	0	no	NA	NA	NA	NA	NA	ENSMUSG00000064842	snRNA	NA	NA	NA	NA
	XLOC_000004	1	3879538	3908561	+	lncRNA	NA	TRUE	none	410	156	NA	lncRNA	0	0	0	0	0	0	0	0	0	0	no	NA	NA	NA	NA	NA	Necsulea_CUFF.124407	lncRNA	NA	NA	NA	NA
	XLOC_000005	1	3941408	3955280	+	lncRNA	NA	TRUE	none	948	696	0.267377	lncRNA	0	0	0	0	0	0	0	0	0	0	no	NA	NA	NA	NA	NA	Necsulea_Locus_81155|Necsulea_Locus_80683	lncRNA	NA	NA	NA	NA
	XLOC_000006	1	3955807	3956550	+	lncRNA	NA	TRUE	none	614	520	NA	lncRNA	0	0	0	0	0	1.05768	0	0	0	0	no	NA	NA	NA	NA	NA	Necsulea_Locus_81155|Necsulea_Locus_80683	lncRNA	NA	NA	NA	NA
	XLOC_000007	1	4529016	4529123	+	snRNA	NA	FALSE	none	107	107	0.0127366	lncRNA	0	0	0	0	0	0	0	0.992745	0	0	no	NA	NA	NA	NA	NA	ENSMUSG00000096126	snRNA	NA	NA	NA	NA
	XLOC_000008	1	4590812	4598050	+	lncRNA	NA	TRUE	none	2006	324	NA	lncRNA	0	0	0	0	0	0	0	0	0	0	no	NA	NA	NA	NA	NA	Necsulea_Locus_81117	lncRNA	NA	NA	NA	NA
	XLOC_000009	1	4772289	4772531	+	NA	NA	FALSE	none	242	0	0.320377	lncRNA	69.6511	61.498	85.247	53.6338	19.7721	31.7304	14.9135	14.8912	16.1849	17.3835	no	NA	NA	NA	NA	NA	NA	NA	NA	NA	NA	NA
	XLOC_000010	1	4807787	4897909	+	nonsense_mediated_decay;protein_coding	NA	FALSE	none	6213	738	0.763113	protein_coding	6856.97	5831.86	5264	4734.22	3291.54	3426.89	2416.91	2283.31	2246.84	2409.55	no	NA	NA	NA	NA	NA	NA	NA	NA	NA	NA	NA
	XLOC_000011	1	5063059	5064647	+	processed_pseudogene	NA	FALSE	none	1588	0	NA	lncRNA	0	0	0	0	0	0	0	0	0	0	no	NA	NA	NA	NA	NA	ENSMUSG00000091665	processed_pseudogene	NA	NA	NA	NA
	XLOC_000012	1	5083084	5162894	+	protein_coding	NA	FALSE	protein_coding	2749	126	2.21634	protein_coding	1683.54	1232.28	1487.38	1167.57	774.235	847.202	823.037	540.053	707.375	838.273	yes	mRNA	9	148	23	163	ENSMUSG00000033793	protein_coding	237.785	0.214337	209.657	0.0287219
	XLOC_000013	1	5588492	5606131	+	protein_coding	NA	FALSE	protein_coding	4769	202	NA	protein_coding	1.83292	4.64136	9.76789	15.4713	40.5849	11.6345	3.72837	0.992745	0.952052	7.72602	no	mRNA	NA	NA	NA	NA	ENSMUSG00000025905	protein_coding	NA	NA	NA	NA
	XLOC_000014	1	6206196	6276648	+	nonsense_mediated_decay;protein_coding	NA	FALSE	none	9724	860	1.42278	protein_coding	1172.15	1070.99	1146.39	1216.04	1318.49	937.105	1372.97	1379.92	1503.29	1495.95	no	NA	NA	NA	NA	NA	ENSMUSG00000025907	nonsense_mediated_decay,protein_coding	54.9146	0.107792	204.559	0.0298431
	XLOC_000015	1	6359330	6394731	+	protein_coding	NA	FALSE	none	858	54	NA	protein_coding	0	1.16034	0.88799	2.06284	1.04064	0	1.86418	0	0	0	no	NA	NA	NA	NA	NA	ENSMUSG00000087247	protein_coding	NA	NA	NA	NA
	XLOC_000016	1	6442061	6443158	+	lncRNA	NA	TRUE	none	207	195	NA	lncRNA	0	0	0	1.03142	0	0	0	0	0	0	no	NA	NA	NA	NA	NA	Necsulea_Locus_81381	lncRNA	NA	NA	NA	NA
	XLOC_000017	1	6487230	6861144	+	protein_coding	NA	FALSE	protein_coding	6717	202	NA	protein_coding	0	0	0.88799	5.1571	0	0	3.72837	12.9057	87.5888	246.267	no	NA	NA	NA	NA	NA	ENSMUSG00000033740	protein_coding	NA	NA	NA	NA
	XLOC_000018	1	7088919	7179037	+	processed_pseudogene;nonsense_mediated_decay;protein_coding	NA	FALSE	none	22376	6861	2.49088	protein_coding	1108	1279.85	1069.14	1144.88	2062.54	1423.64	1102.66	1449.41	1450.93	1563.55	no	NA	NA	NA	NA	NA	NA	NA	NA	NA	NA	NA
	XLOC_000019	1	7265802	7265932	+	snoRNA	NA	FALSE	none	130	0	NA	lncRNA	0	0	0	0	0	0	0	0	0	0	no	NA	NA	NA	NA	NA	ENSMUSG00000077244	snoRNA	NA	NA	NA	NA
	XLOC_000020	1	7375607	7378784	+	lncRNA	NA	TRUE	none	726	566	NA	lncRNA	0	0	0	0	0	0	0	0	0	0	no	NA	NA	NA	NA	NA	Necsulea_ENSMUSG00000086461|Ensembl_ENSMUSG00000097797|Necsulea_Locus_80959|Guttman_lincRNA_209	lncRNA	NA	NA	NA	NA
	XLOC_000021	1	8816137	8816247	+	miRNA	NA	FALSE	none	110	0	0.163225	lncRNA	0	0	0	0	0	0	0	0	0	0	no	NA	NA	NA	NA	NA	ENSMUSG00000076135	miRNA	NA	NA	NA	NA
	XLOC_000022	1	9458669	9458772	+	snRNA	NA	FALSE	none	103	102	NA	lncRNA	0	0	0	0	0	0	0	0	0	0	no	NA	NA	NA	NA	NA	ENSMUSG00000065625	snRNA	NA	NA	NA	NA
	XLOC_000023	1	9545407	9547454	+	protein_coding	NA	FALSE	protein_coding	2047	0	1.92158	protein_coding	878.887	516.351	824.054	841.639	515.116	651.531	485.62	543.031	411.287	464.527	yes	mRNA	8	74	25	270	ENSMUSG00000061024	protein_coding	28.5135	-0.199422	24.6362	-0.330822
	XLOC_000024	1	9547947	9577970	+	nonsense_mediated_decay;protein_coding	processed_pseudogene	FALSE	none	3721	608	NA	protein_coding	107.226	74.2617	31.0796	28.8798	20.8128	29.6151	36.3516	32.7606	32.3698	20.2808	no	NA	NA	NA	NA	NA	ENSMUSG00000025911	nonsense_mediated_decay,protein_coding	NA	NA	NA	NA
	XLOC_000025	1	9574547	9575649	+	processed_pseudogene	nonsense_mediated_decay;protein_coding	FALSE	none	1102	363	16.2223	protein_coding	0.916462	1.16034	0.88799	0	0	0	0	0	0	0	no	NA	NA	NA	NA	NA	ENSMUSG00000081441	processed_pseudogene	NA	NA	NA	NA
	XLOC_000026	1	9601198	9627143	+	protein_coding	NA	FALSE	protein_coding	3256	372	NA	protein_coding	0	0	0	0	0	1.05768	0.932091	0	17.1369	60.8424	no	NA	NA	NA	NA	NA	ENSMUSG00000067879	protein_coding	NA	NA	NA	NA
	XLOC_000027	1	9700771	9701932	+	NA	NA	FALSE	none	1161	117	NA	lncRNA	2.74938	2.32068	7.10392	5.1571	3.12191	3.17304	3.72837	2.97823	13.3287	4.82876	no	lncRNA	NA	NA	NA	NA	NA	NA	NA	NA	NA	NA
	XLOC_000028	1	9798004	9902556	+	protein_coding	NA	FALSE	protein_coding	5921	358	NA	protein_coding	101.727	162.447	266.397	291.892	154.014	472.783	145.406	120.122	49.5067	87.8835	yes	mRNA	11	70	8	40	ENSMUSG00000025915	protein_coding	31.2274	0.0182565	19.6252	-0.18986
	XLOC_000029	1	9908637	9942085	+	nonsense_mediated_decay;protein_coding	NA	FALSE	none	5916	1533	0.261204	protein_coding	50.4054	60.3376	31.0796	14.4399	22.894	17.9806	8.38882	11.9129	1.9041	3.86301	no	NA	NA	NA	NA	NA	ENSMUSG00000046101	nonsense_mediated_decay,protein_coding	29.2134	-0.610937	73.4016	-0.790157
	XLOC_000030	1	10038217	10136768	+	protein_coding	NA	FALSE	protein_coding	6665	163	1.13848	protein_coding	548.044	514.03	490.17	522.93	834.592	615.57	540.613	831.92	551.238	597.801	no	mRNA	NA	NA	NA	NA	ENSMUSG00000056763	protein_coding	95.7607	-0.098302	215.382	-0.0418458
	XLOC_000031	1	10233069	10235098	+	NA	NA	FALSE	none	2029	200	NA	lncRNA	0.916462	2.32068	0.88799	6.18852	8.3251	7.40377	8.38882	5.95647	23.8013	12.5548	no	NA	NA	NA	NA	NA	NA	NA	NA	NA	NA	NA
	XLOC_000032	1	10254100	10254795	+	lncRNA	NA	TRUE	none	283	0	NA	lncRNA	0	0	0	1.03142	0	0	0	0	0	0	no	NA	NA	NA	NA	NA	Necsulea_Locus_80657	lncRNA	NA	NA	NA	NA
	XLOC_000033	1	10695122	10695614	+	processed_pseudogene	NA	FALSE	none	492	30	NA	lncRNA	0	0	0	0	0	0	0	0	0	0	no	NA	NA	NA	NA	NA	ENSMUSG00000081417	processed_pseudogene	NA	NA	NA	NA
	XLOC_000034	1	10878631	10882125	+	lncRNA	NA	TRUE	none	277	195	NA	lncRNA	0	0	0.88799	1.03142	2.08128	0	0	0.992745	0	0	no	NA	NA	NA	NA	NA	Guttman_lincRNA_210	lncRNA	NA	NA	NA	NA
	XLOC_000035	1	10921669	10921760	+	snoRNA	NA	FALSE	none	91	0	NA	lncRNA	0	0	0	0	0	0	0	0	0	0	no	NA	NA	NA	NA	NA	ENSMUSG00000088585	snoRNA	NA	NA	NA	NA
	XLOC_000036	1	10993366	11303682	+	protein_coding	NA	FALSE	protein_coding	11159	637	NA	lncRNA	69.6511	63.8187	149.182	231.038	269.525	267.593	480.959	686.98	350.355	503.157	yes	mRNA	24	398	7	179	ENSMUSG00000048960	protein_coding	NA	NA	36.6686	0.197675
	XLOC_000037	1	11327927	11338521	+	lncRNA	NA	TRUE	none	2137	1488	NA	lncRNA	0	0	0	0	0	0	0.932091	0	0	0	no	NA	NA	NA	NA	NA	Necsulea_Locus_81049	lncRNA	NA	NA	NA	NA
	XLOC_000038	1	11414104	11975901	+	nonsense_mediated_decay;protein_coding	NA	FALSE	none	8985	1141	0.0955664	protein_coding	74.2334	68.46	47.9514	68.0737	223.737	111.056	20.506	24.8186	16.1849	16.4178	no	NA	NA	NA	NA	NA	NA	NA	NA	NA	NA	NA
	XLOC_000039	1	11983294	11989797	+	lncRNA	NA	TRUE	none	1081	0	NA	lncRNA	0	0	0	0	0	1.05768	0	0.992745	0	0	no	NA	NA	NA	NA	NA	Necsulea_CUFF.125078	lncRNA	NA	NA	NA	NA
	XLOC_000040	1	12233429	12315581	+	lncRNA	NA	TRUE	none	658	185	NA	protein_coding	0	0	0	0	0	0	0	0	0	0	no	NA	NA	NA	NA	NA	Necsulea_Locus_80268	lncRNA	NA	NA	NA	NA
	XLOC_000041	1	12374935	12375042	+	snRNA	NA	FALSE	none	107	107	0.0201199	lncRNA	0	0	0	0	0	0	0	0	0	0	no	NA	NA	NA	NA	NA	ENSMUSG00000093864	snRNA	NA	NA	NA	NA
	XLOC_000042	1	12425985	12426106	+	miRNA	NA	FALSE	none	121	0	NA	lncRNA	0	0	0	0	0	0	0	0	0	0	no	NA	NA	NA	NA	NA	ENSMUSG00000098555	miRNA	NA	NA	NA	NA
	XLOC_000043	1	12565576	12566383	+	processed_pseudogene	NA	FALSE	none	807	0	2.3104	lncRNA	0	0	0	0	0	0	0	0	0	0	no	NA	NA	NA	NA	NA	ENSMUSG00000097628	processed_pseudogene	NA	NA	NA	NA
	XLOC_000044	1	12655866	12656553	+	processed_pseudogene	NA	FALSE	none	687	0	NA	lncRNA	0	0	0	0	0	0	0	0	0	0	no	NA	NA	NA	NA	NA	ENSMUSG00000098163	processed_pseudogene	NA	NA	NA	NA
	XLOC_000045	1	12667562	12673090	+	lncRNA	NA	TRUE	none	3200	2197	NA	lncRNA	1.83292	11.6034	3.55196	5.1571	27.0566	13.7499	14.9135	17.8694	9.52052	12.5548	no	NA	NA	NA	NA	NA	Ensembl_ENSMUSG00000097171|Necsulea_ENSMUSG00000066918|Necsulea_blastnHuman.ENSG00000253479	lncRNA	NA	NA	NA	NA
	XLOC_000046	1	12692337	12862624	+	protein_coding	NA	FALSE	protein_coding	7208	109	NA	protein_coding	637.857	241.351	554.105	936.529	1050	1692.29	486.552	359.374	284.664	507.986	yes	mRNA	33	655	33	137	ENSMUSG00000016918	protein_coding	16.6434	-0.14129	48.8899	0.321285
	XLOC_000047	1	13062018	13062348	+	protein_coding	NA	FALSE	none	330	0	NA	lncRNA	0	0	0	0	0	0	0	0	0	0	no	NA	NA	NA	NA	NA	ENSMUSG00000069620	protein_coding	NA	NA	NA	NA
	XLOC_000048	1	13068807	13074935	+	lncRNA	NA	TRUE	none	297	0	NA	lncRNA	5.49877	0	6.21593	3.09426	2.08128	2.11536	0.932091	0	0	0	no	NA	NA	NA	NA	NA	Necsulea_Locus_81346|Necsulea_CUFF.125139|Necsulea_CUFF.125146	lncRNA	NA	NA	NA	NA
	XLOC_000049	1	13075894	13077168	+	lncRNA	NA	TRUE	none	920	113	NA	lncRNA	3.66585	4.64136	4.43995	3.09426	2.08128	0	0.932091	0	0	0	no	NA	NA	NA	NA	NA	Necsulea_Locus_81346|Necsulea_CUFF.125139|Necsulea_CUFF.125146	lncRNA	NA	NA	NA	NA
	XLOC_000050	1	13078445	13078742	+	lncRNA	NA	TRUE	none	212	4	NA	lncRNA	3.66585	5.8017	2.66397	1.03142	2.08128	0	0.932091	0.992745	0	0	no	NA	NA	NA	NA	NA	Guttman_lincRNA_212	lncRNA	NA	NA	NA	NA
	XLOC_000051	1	13262197	13262279	+	miRNA	NA	FALSE	none	82	0	NA	lncRNA	0	0	0	0	0	0	0	0	0	0	no	NA	NA	NA	NA	NA	ENSMUSG00000099183	miRNA	NA	NA	NA	NA
	XLOC_000052	1	13374332	13377431	+	NA	NA	FALSE	none	3099	570	NA	lncRNA	4.58231	2.32068	0.88799	0	14.5689	10.5768	19.5739	16.8767	16.1849	22.2123	no	NA	NA	NA	NA	NA	NA	NA	NA	NA	NA	NA
	XLOC_000053	1	13668770	13701723	+	protein_coding	NA	FALSE	none	1926	110	NA	protein_coding	0.916462	1.16034	1.77598	0	1.04064	2.11536	2.79627	0.992745	0.952052	0.965752	no	NA	NA	NA	NA	NA	ENSMUSG00000067813	protein_coding	NA	NA	NA	NA
	XLOC_000054	1	14182577	14182677	+	miRNA	NA	FALSE	none	100	100	NA	lncRNA	0	0	0	0	0	0	0	0	0	0	no	NA	NA	NA	NA	NA	ENSMUSG00000095853	miRNA	NA	NA	NA	NA
	XLOC_000055	1	14412383	14422565	+	lncRNA	NA	TRUE	none	268	0	NA	lncRNA	0	0	0.88799	0	0	0	0	0	0	0	no	NA	NA	NA	NA	NA	Necsulea_CUFF.125271|Necsulea_Locus_81762	lncRNA	NA	NA	NA	NA
	XLOC_000056	1	14464427	14464630	+	lncRNA	NA	TRUE	none	203	0	NA	lncRNA	0	0	0	0	0	0	0	0	0	0.965752	no	NA	NA	NA	NA	NA	Necsulea_blastnOpossum.Locus_90073	lncRNA	NA	NA	NA	NA
	XLOC_000057	1	14735733	14739073	+	lncRNA	NA	TRUE	none	305	198	NA	lncRNA	0	0	0	1.03142	0	0	0	0	0	0	no	NA	NA	NA	NA	NA	Necsulea_Locus_80534	lncRNA	NA	NA	NA	NA
	XLOC_000058	1	14755453	14774347	+	protein_coding	NA	FALSE	none	3451	168	NA	lncRNA	0.916462	6.96204	3.55196	6.18852	7.28447	5.2884	0	0	1.9041	2.89726	no	mRNA	NA	NA	NA	NA	ENSMUSG00000054493	protein_coding	NA	NA	NA	NA
	XLOC_000059	1	14775524	14776663	+	lncRNA	NA	TRUE	none	225	115	NA	lncRNA	0	0	0	1.03142	0	0	0.932091	0	0	0	no	NA	NA	NA	NA	NA	Necsulea_Locus_80889	lncRNA	NA	NA	NA	NA
	XLOC_000060	1	14865071	14865965	+	processed_pseudogene	NA	FALSE	none	894	0	0.765913	protein_coding	0.916462	1.16034	0	1.03142	1.04064	0	0	0.992745	0.952052	0.965752	no	NA	NA	NA	NA	NA	ENSMUSG00000082193	processed_pseudogene	NA	NA	NA	NA
	XLOC_000061	1	15248604	15251262	+	lncRNA	NA	TRUE	none	370	116	NA	lncRNA	0	0	0	0	0	0	0	0	0	0	no	NA	NA	NA	NA	NA	Necsulea_Locus_80151	lncRNA	NA	NA	NA	NA
	XLOC_000062	1	15287242	15716367	+	protein_coding	NA	FALSE	protein_coding	8096	419	NA	protein_coding	0	0	0	1.03142	1.04064	2.11536	31.6911	46.659	37.13	35.7328	no	NA	NA	NA	NA	NA	NA	NA	NA	NA	NA	NA
	XLOC_000063	1	15757831	15757963	+	snoRNA	NA	FALSE	none	132	0	NA	lncRNA	0	0	0	0	0	0	0	0	0	0	no	NA	NA	NA	NA	NA	ENSMUSG00000077377	snoRNA	NA	NA	NA	NA
	XLOC_000064	1	15794780	15796638	+	lncRNA	NA	TRUE	none	507	56	NA	lncRNA	0	1.16034	0	0	0	0	0	0	0	0	no	NA	NA	NA	NA	NA	Necsulea_Locus_80143|Guttman_lincRNA_213	lncRNA	NA	NA	NA	NA
	XLOC_000065	1	15805623	15853948	+	protein_coding	NA	FALSE	protein_coding	13601	4655	3.28364	protein_coding	396.828	522.153	430.675	401.222	697.228	542.59	407.324	644.291	493.163	431.691	yes	mRNA	10	201	69	515	ENSMUSG00000025925	protein_coding	106.73	0.279448	140.502	0.097154
	XLOC_000066	1	16105315	16133848	+	protein_coding	NA	FALSE	protein_coding	5768	45	0.622824	protein_coding	98.0614	88.1858	83.471	145.43	152.974	216.825	626.365	605.574	500.78	458.732	no	mRNA	NA	NA	NA	NA	ENSMUSG00000025921	protein_coding	NA	NA	64.7869	0.380104
	XLOC_000067	1	16177672	16177895	+	lncRNA	NA	TRUE	none	223	0	NA	lncRNA	0	0	0	0	0	0	0	0	0	0	no	NA	NA	NA	NA	NA	Necsulea_blastnHuman.ENSG00000253339	lncRNA	NA	NA	NA	NA
	XLOC_000068	1	16619645	16620957	+	NA	NA	FALSE	none	1312	0	NA	lncRNA	2.74938	1.16034	0.88799	6.18852	3.12191	11.6345	6.52464	4.96372	9.52052	14.4863	no	NA	NA	NA	NA	NA	NA	NA	NA	NA	NA	NA
	XLOC_000069	1	16657551	16662278	+	lncRNA	NA	FALSE	none	2997	1487	0.54758	lncRNA	0	0	0	0	3.12191	5.2884	0.932091	2.97823	6.66437	1.9315	no	NA	NA	NA	NA	NA	Ensembl_ENSMUSG00000097744|Necsulea_ENSMUSG00000087414	Overlap	NA	NA	NA	NA
	XLOC_000070	1	16665206	16678275	+	protein_coding	NA	FALSE	protein_coding	1901	650	0.865927	protein_coding	331.759	397.996	285.933	246.509	155.055	193.556	274.035	257.121	302.753	310.972	yes	mRNA	7	41	82	111	ENSMUSG00000025940	protein_coding	12.9663	-0.004199	60.7134	-0.0984987
	XLOC_000071	1	16688455	16709605	+	protein_coding	NA	FALSE	none	603	31	3.52625	protein_coding	7.33169	2.32068	0.88799	2.06284	1.04064	1.05768	2.79627	4.96372	1.9041	5.79451	no	NA	NA	NA	NA	NA	ENSMUSG00000025779	protein_coding	NA	NA	NA	NA
	XLOC_000072	1	17099178	17100166	+	NA	NA	FALSE	none	988	52	NA	lncRNA	0	0	0	0	9.36574	3.17304	0.932091	0.992745	0.952052	0	no	NA	NA	NA	NA	NA	NA	NA	NA	NA	NA	NA
	XLOC_000073	1	17101118	17102646	+	NA	NA	FALSE	none	1528	808	NA	lncRNA	0	2.32068	2.66397	2.06284	15.6096	8.46145	4.66046	2.97823	0.952052	0	no	NA	NA	NA	NA	NA	NA	NA	NA	NA	NA	NA
	XLOC_000074	1	17103388	17106723	+	NA	NA	TRUE	lincRNA	3335	1120	NA	lncRNA	0	0	6.21593	4.12568	34.3411	12.6922	0.932091	5.95647	0.952052	0.965752	no	lncRNA	NA	NA	NA	NA	NA	NA	NA	NA	NA	NA
	XLOC_000075	1	17116807	17117554	+	NA	NA	TRUE	none	747	29	0.385953	lncRNA	0	0	0.88799	0	4.16255	2.11536	0	0	0	0	no	NA	NA	NA	NA	NA	NA	NA	NA	NA	NA	NA
	XLOC_000076	1	17145361	17164271	+	protein_coding	NA	FALSE	protein_coding	3949	46	NA	protein_coding	0	1.16034	0.88799	5.1571	3.12191	5.2884	0.932091	6.94921	33.3218	43.4589	no	NA	NA	NA	NA	NA	ENSMUSG00000025777	protein_coding	NA	NA	NA	NA
	XLOC_000077	1	17202941	17205617	+	lncRNA	NA	TRUE	none	526	438	NA	lncRNA	0	0	0	0	0	0	0	0	0	0	no	NA	NA	NA	NA	NA	Necsulea_Locus_81376	lncRNA	NA	NA	NA	NA
	XLOC_000078	1	17254214	17255769	+	NA	NA	TRUE	none	1555	0	NA	lncRNA	0	1.16034	5.32794	4.12568	7.28447	1.05768	0	0	0	0	no	lncRNA	NA	NA	NA	NA	NA	NA	NA	NA	NA	NA
	XLOC_000079	1	17520000	17520111	+	snoRNA	NA	FALSE	none	111	0	NA	lncRNA	0	0	0	0	0	0	0	0	0	0	no	NA	NA	NA	NA	NA	ENSMUSG00000089534	snoRNA	NA	NA	NA	NA
	XLOC_000080	1	17601900	17630938	+	protein_coding	NA	FALSE	none	6922	1347	NA	protein_coding	0	0	0.88799	0	3.12191	2.11536	0	0	0.952052	0	no	NA	NA	NA	NA	NA	ENSMUSG00000067780	protein_coding	NA	NA	NA	NA
	XLOC_000081	1	17727044	17767489	+	protein_coding	NA	FALSE	protein_coding	5660	548	NA	protein_coding	16.4963	8.12237	51.5034	96.9535	82.2104	159.71	12.1172	35.7388	7.61642	48.2876	no	mRNA	NA	NA	NA	NA	ENSMUSG00000025776	protein_coding	NA	NA	NA	NA
	XLOC_000082	1	18152756	18160261	+	lncRNA	NA	TRUE	none	423	183	NA	lncRNA	0	0	0	0	0	0	0	0	0	0	no	NA	NA	NA	NA	NA	Necsulea_CUFF.125506	lncRNA	NA	NA	NA	NA
	XLOC_000083	1	19103021	19166346	+	protein_coding	NA	FALSE	none	1761	0	NA	protein_coding	0	0	0	0	0	0	0	0	0	0	no	NA	NA	NA	NA	NA	ENSMUSG00000042596	protein_coding	NA	NA	NA	NA
	XLOC_000084	1	19208913	19238734	+	protein_coding	NA	FALSE	protein_coding	6391	272	NA	protein_coding	0	0	0	2.06284	0	0	62.4501	34.7461	118.054	149.692	no	NA	NA	NA	NA	NA	ENSMUSG00000025927	protein_coding	NA	NA	34.909	0.589768
	XLOC_000085	1	19259115	19259677	+	lncRNA	NA	TRUE	none	406	125	NA	lncRNA	0	0	0	0	0	0	0	0	0	0	no	NA	NA	NA	NA	NA	Necsulea_CUFF.125540	lncRNA	NA	NA	NA	NA
	XLOC_000086	1	19606037	19636878	+	lncRNA	NA	TRUE	none	465	226	NA	lncRNA	0	0	0	0	0	0	0	0	0	0	no	NA	NA	NA	NA	NA	Necsulea_Locus_81389	lncRNA	NA	NA	NA	NA
	XLOC_000087	1	19965027	19967811	+	lncRNA	NA	TRUE	none	696	422	NA	lncRNA	0	0	0	0	0	0	0	0	0	0	no	NA	NA	NA	NA	NA	Necsulea_Locus_80236	lncRNA	NA	NA	NA	NA
	XLOC_000088	1	19974097	19979653	+	lncRNA	NA	TRUE	none	336	0	NA	lncRNA	0	0	0	0	0	0	0	0	0.952052	0	no	NA	NA	NA	NA	NA	Necsulea_Locus_81341	lncRNA	NA	NA	NA	NA
	XLOC_000089	1	20679009	20679082	+	miRNA	NA	FALSE	none	73	0	NA	lncRNA	0	0	0	0	0	0	0	0	0	0	no	NA	NA	NA	NA	NA	ENSMUSG00000065559	miRNA	NA	NA	NA	NA
	XLOC_000090	1	20682768	20682887	+	miRNA	NA	FALSE	none	119	0	NA	lncRNA	0	0	0	0	0	0	0	0	0	0	no	NA	NA	NA	NA	NA	ENSMUSG00000065480	miRNA	NA	NA	NA	NA
	XLOC_000091	1	20730904	20734496	+	protein_coding	NA	FALSE	none	1171	0	NA	protein_coding	0	0	0	0	0	0	0	0	0	0	no	NA	NA	NA	NA	NA	ENSMUSG00000025929	protein_coding	NA	NA	NA	NA
	XLOC_000092	1	20870116	20870798	+	lncRNA	NA	TRUE	none	387	0	NA	lncRNA	0	0	0	0	0	0	0	0	0	0	no	NA	NA	NA	NA	NA	Necsulea_Locus_82119|Necsulea_Locus_81072	lncRNA	NA	NA	NA	NA
	XLOC_000093	1	20890587	20939708	+	protein_coding	NA	FALSE	protein_coding	5722	568	NA	protein_coding	225.45	249.473	97.6789	71.168	86.373	93.0759	136.085	95.3035	95.2052	103.336	yes	mRNA	2	69	8	124	ENSMUSG00000025931	protein_coding	NA	NA	NA	NA
	XLOC_000094	1	20951581	20990838	+	protein_coding	NA	FALSE	protein_coding	2249	0	NA	protein_coding	32.0762	37.1309	8.8799	8.25136	22.894	58.1725	39.1478	27.7969	24.7534	17.3835	no	mRNA	NA	NA	NA	NA	ENSMUSG00000041809	protein_coding	NA	NA	NA	NA
	XLOC_000095	1	21218574	21230167	+	protein_coding	NA	FALSE	protein_coding	1351	0	1.5826	protein_coding	87.0638	75.422	39.9595	29.9112	16.6502	19.0383	20.506	11.9129	22.8493	16.4178	yes	mRNA	3	11	9	39	ENSMUSG00000025933	protein_coding	NA	NA	11.9718	0.0189593
	XLOC_000096	1	21240588	21265605	+	protein_coding	NA	FALSE	protein_coding	1883	392	NA	protein_coding	92.5626	53.3756	18.6478	17.5341	3.12191	3.17304	11.1851	8.9347	10.4726	14.4863	no	mRNA	NA	NA	NA	NA	ENSMUSG00000025934	protein_coding	NA	NA	NA	NA
	XLOC_000097	1	21272337	21273082	+	protein_coding	NA	FALSE	none	745	0	NA	protein_coding	0	1.16034	0	0	0	1.05768	0	0.992745	0	0	no	NA	NA	NA	NA	NA	ENSMUSG00000096375	protein_coding	NA	NA	NA	NA
	XLOC_000098	1	21349640	21352200	+	protein_coding	NA	FALSE	none	1987	47	NA	lncRNA	0.916462	0	0	0	0	0	0	0	0	0	no	NA	NA	NA	NA	NA	ENSMUSG00000067750	protein_coding	NA	NA	NA	NA
	XLOC_000099	1	21354004	21355116	+	unprocessed_pseudogene	NA	FALSE	none	371	0	NA	lncRNA	0	0	0	0	0	0	0	0	0	0	no	NA	NA	NA	NA	NA	ENSMUSG00000086194	unprocessed_pseudogene	NA	NA	NA	NA
	XLOC_000100	1	21364802	21365030	+	unprocessed_pseudogene	NA	FALSE	none	228	0	NA	lncRNA	0	0	0	0	0	0	0	0	0	0	no	NA	NA	NA	NA	NA	ENSMUSG00000094436	unprocessed_pseudogene	NA	NA	NA	NA
	XLOC_000101	1	21368330	21370845	+	protein_coding	NA	FALSE	none	1946	143	NA	lncRNA	1.83292	0	0	0	0	0	0	0	0	0	no	NA	NA	NA	NA	NA	ENSMUSG00000041722	protein_coding	NA	NA	NA	NA
	XLOC_000102	1	21372669	21373764	+	unprocessed_pseudogene	NA	FALSE	none	350	0	NA	lncRNA	0	0	0	0	0	0	0	0	0	0	no	NA	NA	NA	NA	NA	ENSMUSG00000085507	unprocessed_pseudogene	NA	NA	NA	NA
	XLOC_000103	1	21379554	21379782	+	unprocessed_pseudogene	NA	FALSE	none	228	0	NA	lncRNA	0	0	0	0	0	0	0	0	0	0	no	NA	NA	NA	NA	NA	ENSMUSG00000094926	unprocessed_pseudogene	NA	NA	NA	NA
	XLOC_000104	1	21383555	21386373	+	protein_coding	NA	FALSE	none	2236	65	NA	lncRNA	0	0	0	0	0	0	0	0	0	0	no	NA	NA	NA	NA	NA	ENSMUSG00000085079	protein_coding	NA	NA	NA	NA
	XLOC_000105	1	21390905	21391101	+	processed_pseudogene	NA	FALSE	none	196	0	NA	lncRNA	0	0	0	0	0	0	0	0	0	0	no	NA	NA	NA	NA	NA	ENSMUSG00000085679	processed_pseudogene	NA	NA	NA	NA
	XLOC_000106	1	22740763	22741565	+	processed_pseudogene	NA	FALSE	none	802	0	NA	lncRNA	0	0	0	0	0	0	0	0	0	0	no	NA	NA	NA	NA	NA	ENSMUSG00000097642	processed_pseudogene	NA	NA	NA	NA
	XLOC_000107	1	23115981	23120707	+	lncRNA	NA	TRUE	none	293	0	NA	lncRNA	0	0	0	0	0	0	0	0	0	0	no	NA	NA	NA	NA	NA	Necsulea_Locus_80230	lncRNA	NA	NA	NA	NA
	XLOC_000108	1	23123741	23124874	+	lncRNA	NA	TRUE	none	544	338	NA	lncRNA	0	0	0	0	0	0	0	0	0	0	no	NA	NA	NA	NA	NA	Necsulea_Locus_80937	lncRNA	NA	NA	NA	NA
	XLOC_000109	1	23245210	23245331	+	snoRNA	NA	FALSE	none	121	0	NA	lncRNA	0	0	0	0	0	0	0	0	0	0	no	NA	NA	NA	NA	NA	ENSMUSG00000089553	snoRNA	NA	NA	NA	NA
	XLOC_000110	1	23256269	23293862	+	miRNA;lncRNA	NA	FALSE	none	36788	3205	0.165771	lncRNA	285.936	404.958	148.294	171.216	686.821	649.416	1062.58	1280.64	1265.28	1172.42	no	NA	NA	NA	NA	NA	NA	NA	NA	NA	NA	NA
	XLOC_000111	1	23294033	23295416	+	NA	NA	FALSE	none	1383	136	NA	lncRNA	5.49877	4.64136	0.88799	1.03142	8.3251	10.5768	9.32091	11.9129	10.4726	5.79451	no	NA	NA	NA	NA	NA	NA	NA	NA	NA	NA	NA
	XLOC_000112	1	23479538	23480527	+	processed_pseudogene	NA	FALSE	none	989	0	2.16551	lncRNA	0	0	0	0	0	0	0	0	0	0	no	NA	NA	NA	NA	NA	ENSMUSG00000097920	processed_pseudogene	NA	NA	NA	NA
	XLOC_000113	1	23761752	23849158	+	protein_coding	NA	FALSE	none	6203	91	NA	protein_coding	0	0	0.88799	1.03142	1.04064	3.17304	1.86418	1.98549	2.85616	4.82876	no	NA	NA	NA	NA	NA	ENSMUSG00000026156	protein_coding	NA	NA	10.8478	0.350887
	XLOC_000114	1	23977602	23978470	+	lncRNA	NA	TRUE	none	734	78	NA	lncRNA	0	0	0	0	0	1.05768	0.932091	0	0	0	no	NA	NA	NA	NA	NA	Necsulea_CUFF.126060	lncRNA	NA	NA	NA	NA
	XLOC_000115	1	24005504	24005894	+	protein_coding	NA	FALSE	none	390	0	NA	lncRNA	0	0	0	0	0	0	0	0	0.952052	0	no	NA	NA	NA	NA	NA	ENSMUSG00000096985	protein_coding	NA	NA	NA	NA
	XLOC_000116	1	24125274	24126141	+	processed_pseudogene	NA	FALSE	none	867	0	NA	lncRNA	0	0	0	0	0	0	0	0	0	0	no	NA	NA	NA	NA	NA	ENSMUSG00000097670	processed_pseudogene	NA	NA	NA	NA
	XLOC_000117	1	24177609	24252684	+	protein_coding	NA	FALSE	protein_coding	4105	47	NA	protein_coding	0.916462	0	0.88799	4.12568	2.08128	14.8075	4.66046	8.9347	12.3767	47.3219	no	NA	NA	NA	NA	NA	ENSMUSG00000026147	protein_coding	NA	NA	NA	NA
	XLOC_000118	1	24613072	24613286	+	NA	NA	FALSE	none	214	0	0.0848092	lncRNA	3.66585	0	0	4.12568	0	2.11536	0	5.95647	0	6.76027	no	NA	NA	NA	NA	NA	NA	NA	NA	NA	NA	NA
	XLOC_000119	1	24678543	24766299	+	protein_coding	NA	FALSE	protein_coding	5390	622	5.35854	protein_coding	92.5626	106.751	117.215	181.53	249.753	369.131	484.688	385.185	442.704	394.027	yes	mRNA	8	275	5	129	ENSMUSG00000073725	protein_coding	23.6498	0.101651	111.702	0.0242003
	XLOC_000120	1	24864652	24869200	+	lncRNA	NA	TRUE	none	380	0	NA	lncRNA	0	0	0	0	0	0	0	0	0	0	no	NA	NA	NA	NA	NA	Necsulea_Locus_80303|Necsulea_Locus_80891	lncRNA	NA	NA	NA	NA
	XLOC_000121	1	24869501	24870346	+	lncRNA	NA	TRUE	none	730	36	NA	lncRNA	0	0	0	0	0	0	0	0	0	0	no	NA	NA	NA	NA	NA	Necsulea_Locus_80303|Necsulea_Locus_80891	lncRNA	NA	NA	NA	NA
	XLOC_000122	1	24939301	24943381	+	lncRNA	NA	TRUE	none	307	4	NA	lncRNA	0	0	0	0	0	0	0	0	0	0	no	NA	NA	NA	NA	NA	Necsulea_Locus_80576	lncRNA	NA	NA	NA	NA
	XLOC_000123	1	25027307	25032377	+	lncRNA	NA	TRUE	none	518	219	NA	lncRNA	0	0	0	0	0	0	0	0	0	0	no	NA	NA	NA	NA	NA	Necsulea_Locus_82620|Necsulea_Locus_80517	lncRNA	NA	NA	NA	NA
	XLOC_000124	1	25223729	25224173	+	processed_pseudogene	NA	FALSE	none	444	0	NA	lncRNA	0	0	0	0	0	0	0	0	0	0	no	NA	NA	NA	NA	NA	ENSMUSG00000080849	processed_pseudogene	NA	NA	NA	NA
	XLOC_000125	1	25451070	25451174	+	snRNA	NA	FALSE	none	104	99	NA	lncRNA	0	0	0	0	0	0	0	0	0	0	no	NA	NA	NA	NA	NA	ENSMUSG00000084740	snRNA	NA	NA	NA	NA
	XLOC_000126	1	25830656	25831878	+	protein_coding	NA	FALSE	protein_coding	1222	43	NA	lncRNA	0	0	0	0	0	1.05768	0	0.992745	8.56847	2.89726	no	NA	NA	NA	NA	NA	ENSMUSG00000052558	protein_coding	NA	NA	NA	NA
	XLOC_000127	1	26566832	26566938	+	snoRNA	NA	FALSE	none	106	19	NA	lncRNA	0	0	0	0	0	0	0	0	0	0	no	NA	NA	NA	NA	NA	ENSMUSG00000088111	snoRNA	NA	NA	NA	NA
	XLOC_000128	1	27481190	27527817	+	lncRNA	NA	TRUE	none	1645	815	NA	lncRNA	0	0	0.88799	1.03142	0	0	0	0	0	0	no	NA	NA	NA	NA	NA	Necsulea_Locus_80391	lncRNA	NA	NA	NA	NA
	XLOC_000129	1	27884009	27904976	+	lncRNA	NA	TRUE	none	4618	1948	NA	lncRNA	0	0	0	0	0	0	0	0	0	0	no	NA	NA	NA	NA	NA	Necsulea_Locus_80258	lncRNA	NA	NA	NA	NA
	XLOC_000130	1	28583907	28584210	+	lncRNA	NA	FALSE	none	242	0	NA	protein_coding	0	0	0	0	0	0	0	0	0	0	no	NA	NA	NA	NA	NA	Necsulea_blastnHuman.Locus_146821	Overlap	NA	NA	NA	NA
	XLOC_000131	1	28920248	28921883	+	lncRNA	NA	TRUE	none	307	124	NA	lncRNA	0	0	0	0	0	0	0	0	0	0	no	NA	NA	NA	NA	NA	Necsulea_Locus_80980	lncRNA	NA	NA	NA	NA
	XLOC_000132	1	28938034	28938340	+	processed_pseudogene	NA	FALSE	none	306	0	2.10612	protein_coding	0	0	0	0	0	0	0	0	0	0	no	NA	NA	NA	NA	NA	ENSMUSG00000058590	processed_pseudogene	NA	NA	NA	NA
	XLOC_000133	1	29301479	29301579	+	miRNA	NA	FALSE	none	100	40	NA	lncRNA	0	0	0	0	0	0	0	0	0	0	no	NA	NA	NA	NA	NA	ENSMUSG00000080625	miRNA	NA	NA	NA	NA
	XLOC_000134	1	29421487	29421612	+	miRNA	NA	FALSE	none	125	0	NA	lncRNA	0	0	0	0	0	0	0	0	0	0	no	NA	NA	NA	NA	NA	ENSMUSG00000099257	miRNA	NA	NA	NA	NA
	XLOC_000135	1	29985933	29986043	+	miRNA	NA	FALSE	none	110	110	NA	lncRNA	0	0	0	0	0	0	0	0	0	0	no	NA	NA	NA	NA	NA	ENSMUSG00000096829	miRNA	NA	NA	NA	NA
	XLOC_000136	1	30502471	30516604	+	lncRNA	NA	TRUE	none	475	0	NA	lncRNA	0	0	0	0	0	0	0	0	0	0	no	NA	NA	NA	NA	NA	Necsulea_Locus_81193	lncRNA	NA	NA	NA	NA
	XLOC_000137	1	30616843	30620383	+	lncRNA	NA	TRUE	none	701	660	NA	lncRNA	0	0	0	0	0	0	0.932091	1.98549	0.952052	0	no	NA	NA	NA	NA	NA	Guttman_lincRNA_220	lncRNA	NA	NA	NA	NA
	XLOC_000138	1	30874000	30875326	+	NA	NA	TRUE	lincRNA	1326	180	NA	lncRNA	7.33169	5.8017	0.88799	6.18852	5.20319	11.6345	2.79627	5.95647	14.2808	0.965752	no	NA	NA	NA	NA	NA	NA	NA	NA	NA	NA	NA
	XLOC_000139	1	30949880	30953214	+	NA	NA	FALSE	none	3334	385	NA	lncRNA	5.49877	4.64136	22.1997	25.7855	24.9753	35.9612	16.7776	35.7388	46.6506	38.6301	no	lncRNA	NA	NA	NA	NA	NA	NA	NA	NA	NA	NA
	XLOC_000140	1	31176405	31204656	+	protein_coding	NA	FALSE	none	1863	0	NA	protein_coding	0	0	0	0	0	0	0	0	0.952052	0	no	NA	NA	NA	NA	NA	ENSMUSG00000050217	protein_coding	NA	NA	NA	NA
	XLOC_000141	1	31222838	31224287	+	protein_coding	NA	FALSE	none	1449	0	NA	protein_coding	0	0	0	0	0	0	0	0	0	0	no	NA	NA	NA	NA	NA	ENSMUSG00000026063	protein_coding	NA	NA	NA	NA
	XLOC_000142	1	31286944	31287706	+	protein_coding	NA	FALSE	none	762	61	NA	protein_coding	0	0	0.88799	0	0	0	0	0	3.80821	3.86301	no	NA	NA	NA	NA	NA	ENSMUSG00000094215	protein_coding	NA	NA	NA	NA
	XLOC_000143	1	31329744	31333610	+	lncRNA	NA	TRUE	none	674	259	NA	lncRNA	0	0	0	0	0	0	0	0	0	0	no	NA	NA	NA	NA	NA	Necsulea_Locus_80507	lncRNA	NA	NA	NA	NA
	XLOC_000144	1	31615457	31616843	+	processed_pseudogene	NA	FALSE	none	1386	0	1.75069	protein_coding	27.4938	39.4515	14.2078	10.3142	15.6096	9.51913	7.45673	5.95647	11.4246	6.76027	no	NA	NA	NA	NA	NA	ENSMUSG00000070960	processed_pseudogene	NA	NA	NA	NA
	XLOC_000145	1	31736055	31736892	+	processed_pseudogene	NA	FALSE	none	837	24	NA	lncRNA	1.83292	1.16034	0	0	0	0	0	0	0	0.965752	no	NA	NA	NA	NA	NA	ENSMUSG00000082159	processed_pseudogene	NA	NA	NA	NA
	XLOC_000146	1	32152018	32154234	+	lncRNA	NA	TRUE	none	269	0	NA	lncRNA	0	0	0	0	0	0	0	0	0	0	no	NA	NA	NA	NA	NA	Necsulea_Locus_80360	lncRNA	NA	NA	NA	NA
	XLOC_000147	1	32172805	32658529	+	protein_coding	NA	FALSE	protein_coding	2150	108	NA	protein_coding	5.49877	2.32068	6.21593	20.6284	9.36574	12.6922	5.59255	3.97098	11.4246	29.9383	no	mRNA	NA	NA	NA	NA	ENSMUSG00000026058	protein_coding	NA	NA	NA	NA
	XLOC_000148	1	32700810	32705520	+	lncRNA	NA	TRUE	none	2988	322	NA	lncRNA	0.916462	0	1.77598	1.03142	2.08128	0	0	0.992745	0	2.89726	no	lncRNA	NA	NA	NA	NA	Necsulea_Locus_80932	lncRNA	NA	NA	NA	NA
	XLOC_000149	1	32726638	32726930	+	lncRNA	NA	TRUE	none	292	212	NA	lncRNA	0	0	0	0	0	0	0	0	0	0	no	NA	NA	NA	NA	NA	Ensembl_ENSMUSG00000089395	lncRNA	NA	NA	NA	NA
	XLOC_000150	1	33191992	33192102	+	snRNA	NA	FALSE	none	110	0	NA	lncRNA	0	0	0	0	0	0	0	0	0	0	no	NA	NA	NA	NA	NA	ENSMUSG00000088750	snRNA	NA	NA	NA	NA
	XLOC_000151	1	33293675	33293775	+	snRNA	NA	FALSE	none	100	99	NA	lncRNA	0	0	0	0	0	0	0	0	0	0	no	NA	NA	NA	NA	NA	ENSMUSG00000065223	snRNA	NA	NA	NA	NA
	XLOC_000152	1	33422732	33422838	+	snRNA	NA	FALSE	none	106	106	0.0902831	lncRNA	0	0	0	1.03142	0	0	0	0	0	0	no	NA	NA	NA	NA	NA	ENSMUSG00000065260	snRNA	NA	NA	NA	NA
	XLOC_000153	1	33669842	33670712	+	protein_coding	NA	FALSE	none	870	112	NA	lncRNA	0	1.16034	1.77598	1.03142	2.08128	1.05768	0	0	0.952052	2.89726	no	NA	NA	NA	NA	NA	ENSMUSG00000044744	protein_coding	NA	NA	NA	NA
	XLOC_000154	1	33719881	33743174	+	nonsense_mediated_decay;protein_coding	NA	FALSE	none	5450	126	1.23521	protein_coding	101.727	156.646	176.71	186.687	202.924	160.768	159.388	194.578	139	169.972	no	NA	NA	NA	NA	NA	ENSMUSG00000004768	nonsense_mediated_decay,protein_coding	26.0029	-0.0919484	26.1331	-0.0131427
	XLOC_000155	1	33907814	34308653	+	protein_coding	NA	FALSE	protein_coding	33676	322	0.636711	protein_coding	5320.98	9369.74	6177.74	7720.18	12327.4	8852.79	4626.9	5248.64	3333.14	3119.38	yes	mRNA	266	13891	36	392	ENSMUSG00000026131	protein_coding	239.34	0.172275	238.692	0.159134
	XLOC_000156	1	34439576	34451574	+	nonsense_mediated_decay;protein_coding	NA	FALSE	none	8439	3815	0.846227	protein_coding	1027.35	797.153	1785.75	1503.81	777.357	960.374	586.285	629.4	501.732	552.41	no	NA	NA	NA	NA	NA	ENSMUSG00000026127	nonsense_mediated_decay,protein_coding	273.456	0.0512974	82.7964	0.112096
	XLOC_000157	1	34459745	34473991	+	protein_coding	NA	FALSE	protein_coding	1908	0	NA	protein_coding	30.2432	33.6498	130.534	120.676	103.023	90.9606	26.0986	13.8984	19.9931	17.3835	yes	mRNA	1	59	5	41	ENSMUSG00000026126	protein_coding	NA	NA	NA	NA
	XLOC_000158	1	34485182	34486426	+	lncRNA	NA	TRUE	none	853	118	NA	lncRNA	0	0	0	0	0	0	0	0	0.952052	0	no	NA	NA	NA	NA	NA	Necsulea_Locus_80237	lncRNA	NA	NA	NA	NA
	XLOC_000159	1	34498429	34503062	+	protein_coding	NA	FALSE	none	1246	0	NA	protein_coding	0	0	0	0	1.04064	0	0.932091	0	0	0	no	NA	NA	NA	NA	NA	ENSMUSG00000026125	protein_coding	NA	NA	NA	NA
	XLOC_000160	1	34535252	34544311	+	protein_coding	NA	FALSE	protein_coding	1352	0	NA	protein_coding	10.9975	2.32068	12.4319	17.5341	7.28447	449.514	2.79627	0	2.85616	3.86301	no	mRNA	NA	NA	NA	NA	ENSMUSG00000026124	protein_coding	NA	NA	NA	NA
	XLOC_000161	1	34578978	34590989	+	protein_coding	NA	FALSE	protein_coding	4618	117	NA	protein_coding	0	1.16034	0	9.28278	4.16255	87.7875	0	0.992745	3.80821	12.5548	no	NA	NA	NA	NA	NA	ENSMUSG00000045174	protein_coding	NA	NA	NA	NA
	XLOC_000162	1	34678187	34813309	+	nonsense_mediated_decay;protein_coding;pseudogene	NA	FALSE	none	8700	266	0.530818	protein_coding	69.6511	120.675	92.3509	160.901	126.958	138.556	91.345	63.5357	93.3011	66.6369	no	NA	NA	NA	NA	NA	NA	NA	NA	NA	NA	NA
	XLOC_000163	1	34843119	34844312	+	NA	NA	FALSE	none	1193	599	NA	lncRNA	3.66585	1.16034	1.77598	7.21994	1.04064	6.34609	1.86418	10.9202	11.4246	6.76027	no	NA	NA	NA	NA	NA	NA	NA	NA	NA	NA	NA
	XLOC_000164	1	34849991	34879582	+	protein_coding	NA	FALSE	protein_coding	3422	0	0.683496	protein_coding	1360.03	1721.94	168.718	171.216	201.884	310.958	549.002	368.308	495.067	473.219	yes	mRNA	1	89	7	55	ENSMUSG00000026123	protein_coding	11.2081	0.366186	70.283	0.140347
	XLOC_000165	1	35761601	35761706	+	snRNA	NA	FALSE	none	105	104	NA	lncRNA	0	0	0	0	0	0	0	0	0	0	no	NA	NA	NA	NA	NA	ENSMUSG00000064601	snRNA	NA	NA	NA	NA
	XLOC_000166	1	35869950	35881108	+	lncRNA	NA	TRUE	none	780	19	NA	lncRNA	0.916462	1.16034	0	0	0	0	0	0	0	0	no	NA	NA	NA	NA	NA	Necsulea_Locus_81310	lncRNA	NA	NA	NA	NA
	XLOC_000167	1	35985569	35987682	+	lncRNA	NA	TRUE	none	159	124	NA	lncRNA	0	2.32068	0	0	0	0	0	0	0	0	no	NA	NA	NA	NA	NA	Guttman_lincRNA_223	TooShort	NA	NA	NA	NA
	XLOC_000168	1	36010990	36011862	+	lncRNA	NA	TRUE	none	474	224	NA	lncRNA	7.33169	4.64136	1.77598	0	1.04064	1.05768	0	0	0	1.9315	no	NA	NA	NA	NA	NA	Necsulea_Locus_81467|Guttman_lincRNA_224|Necsulea_Locus_81197	lncRNA	NA	NA	NA	NA
	XLOC_000169	1	36061457	36062309	+	NA	NA	TRUE	none	852	111	NA	lncRNA	7.33169	2.32068	7.10392	10.3142	0	3.17304	0	0	0.952052	0.965752	no	NA	NA	NA	NA	NA	NA	NA	NA	NA	NA	NA
	XLOC_000170	1	36063331	36063638	+	NA	NA	FALSE	none	307	0	NA	lncRNA	2.74938	0	4.43995	1.03142	0	0	0	0	0	0	no	NA	NA	NA	NA	NA	NA	NA	NA	NA	NA	NA
	XLOC_000171	1	36068399	36106446	+	protein_coding	NA	FALSE	protein_coding	3789	0	0.30003	protein_coding	1152.91	1193.99	994.548	1022.14	847.079	609.224	1119.44	911.34	1127.23	888.492	yes	mRNA	22	669	77	580	ENSMUSG00000045216	protein_coding	30.9563	-0.170202	61.8305	-0.15149
	XLOC_000172	1	36108712	36110978	+	NA	NA	FALSE	none	2266	513	NA	lncRNA	2.74938	2.32068	0.88799	0	5.20319	3.17304	13.9814	10.9202	5.71231	10.6233	no	NA	NA	NA	NA	NA	NA	NA	NA	NA	NA	NA
	XLOC_000173	1	36131496	36132240	+	lncRNA	NA	TRUE	none	249	0	NA	lncRNA	0	0	0	0	0	0	0	0	0.952052	0	no	NA	NA	NA	NA	NA	Necsulea_Locus_81248	lncRNA	NA	NA	NA	NA
	XLOC_000174	1	36307732	36324029	+	nonsense_mediated_decay;protein_coding	NA	FALSE	none	6370	396	0.894259	protein_coding	53.1548	55.6963	31.9676	17.5341	21.8534	11.6345	11.1851	8.9347	4.76026	8.69177	no	NA	NA	NA	NA	NA	ENSMUSG00000037447	nonsense_mediated_decay,protein_coding	NA	NA	NA	NA
	XLOC_000175	1	36372290	36421909	+	unitary_pseudogene	NA	FALSE	none	6057	0	NA	lncRNA	0	0	0	3.09426	0	0	0	1.98549	0.952052	0	no	NA	NA	NA	NA	NA	ENSMUSG00000037432	unitary_pseudogene	NA	NA	NA	NA
	XLOC_000176	1	36471619	36508764	+	protein_coding	NA	FALSE	protein_coding	4547	26	0.760601	protein_coding	33.9091	111.393	174.934	194.938	218.534	212.594	212.517	216.418	178.986	167.075	yes	mRNA	7	61	6	55	ENSMUSG00000037408	protein_coding	40.3274	0.16753	39.4324	0.123529
	XLOC_000177	1	36511866	36528658	+	protein_coding	NA	FALSE	protein_coding	6004	1037	0.825566	protein_coding	169.545	211.182	214.005	286.735	506.791	457.976	343.01	384.192	313.225	336.082	yes	mRNA	15	843	39	215	ENSMUSG00000001138	protein_coding	23.6397	0.0631672	53.2435	-0.0038978
	XLOC_000178	1	36558469	36561868	+	NA	NA	FALSE	none	3399	197	NA	lncRNA	0.916462	1.16034	1.77598	0	12.4877	25.3843	48.4688	43.6808	68.5478	58.9109	no	NA	NA	NA	NA	NA	NA	NA	NA	NA	NA	NA
	XLOC_000179	1	36601801	36602146	+	processed_pseudogene	NA	FALSE	none	345	0	5.03218	lncRNA	0	0	0	0	0	0	0	0	0	0	no	NA	NA	NA	NA	NA	ENSMUSG00000089906	processed_pseudogene	NA	NA	NA	NA
	XLOC_000180	1	36663964	36664039	+	miRNA	NA	FALSE	none	75	0	NA	lncRNA	0	0	0	0	0	0	0	0	0	0	no	NA	NA	NA	NA	NA	ENSMUSG00000077939	miRNA	NA	NA	NA	NA
	XLOC_000181	1	36691486	36693385	+	protein_coding	NA	FALSE	none	566	0	1.51759	protein_coding	4586.89	3684.08	2439.31	2341.32	941.777	1302.01	1386.02	909.354	1074.87	1181.12	no	NA	NA	NA	NA	NA	ENSMUSG00000061518	protein_coding	32.3695	-0.470645	24.6175	-0.427541
	XLOC_000182	1	36761860	36782816	+	protein_coding	NA	FALSE	protein_coding	2483	33	NA	protein_coding	65.9852	51.0549	48.8394	16.5027	22.894	11.6345	9.32091	1.98549	3.80821	0	yes	mRNA	1	55	22	22	ENSMUSG00000026117	protein_coding	NA	NA	NA	NA
	XLOC_000183	1	37005438	37005557	+	rRNA	NA	FALSE	none	119	119	4.03531	lncRNA	0	0	0	0	0	0	0	0	0	0	no	NA	NA	NA	NA	NA	ENSMUSG00000095944	rRNA	NA	NA	NA	NA
	XLOC_000184	1	37026595	37141392	+	protein_coding;lncRNA	NA	FALSE	none	3619	33	NA	protein_coding	276.771	183.334	108.335	62.9166	8.3251	11.6345	1.86418	2.97823	0.952052	0	no	NA	NA	NA	NA	NA	NA	NA	NA	NA	NA	NA
	XLOC_000185	1	37153843	37187605	+	protein_coding	NA	FALSE	none	1505	5	NA	protein_coding	5.49877	3.48102	0.88799	1.03142	1.04064	0	0	0	0	0	no	NA	NA	NA	NA	NA	NA	NA	NA	NA	NA	NA
	XLOC_000186	1	37218335	37263536	+	protein_coding	NA	FALSE	protein_coding	3892	1052	0.611496	protein_coding	10.9975	47.5739	24.8637	13.4085	5.20319	3.17304	0.932091	0	0	0	yes	mRNA	3	35	2	21	ENSMUSG00000026114	protein_coding	NA	NA	NA	NA
	XLOC_000187	1	37299892	37411079	+	protein_coding	NA	FALSE	protein_coding	8058	174	0.582804	protein_coding	34.8255	48.7342	65.7112	69.1051	182.112	152.306	186.418	288.889	222.78	235.644	yes	mRNA	12	207	7	89	ENSMUSG00000026113	protein_coding	23.8482	-0.305266	118.598	0.0531526
	XLOC_000188	1	37430169	37439124	+	protein_coding	NA	FALSE	protein_coding	1414	78	0.897695	protein_coding	513.218	342.3	277.053	286.735	180.03	230.574	321.572	269.034	286.568	340.911	no	mRNA	NA	NA	NA	NA	ENSMUSG00000026111	protein_coding	30.9029	-0.0268666	105.84	0.112858
	XLOC_000189	1	37570905	37581544	+	lncRNA	NA	TRUE	none	624	284	NA	lncRNA	0	0	0	0	0	0	0	0	0	0	no	NA	NA	NA	NA	NA	Guttman_lincRNA_226|Necsulea_CUFF.126972	lncRNA	NA	NA	NA	NA
	XLOC_000190	1	37865298	37871388	+	lncRNA	NA	FALSE	none	3089	1311	NA	lncRNA	0.916462	0	0	1.03142	1.04064	2.11536	0	0.992745	0.952052	0	no	NA	NA	NA	NA	NA	Ensembl_ENSMUSG00000097268|Necsulea_ENSMUSG00000092106	Overlap	NA	NA	NA	NA
	XLOC_000191	1	37871737	37877497	+	protein_coding	NA	FALSE	protein_coding	3403	1055	1.12934	protein_coding	151.216	109.072	139.414	117.582	74.9259	84.6145	68.0427	51.6227	82.8286	67.6027	yes	mRNA	6	62	46	97	ENSMUSG00000037216	protein_coding	12.4599	-0.118317	NA	NA
	XLOC_000192	1	37890476	37898535	+	protein_coding	NA	FALSE	none	969	0	0.560692	protein_coding	853.226	691.562	751.239	639.48	421.458	381.823	521.039	368.308	569.327	512.815	no	NA	NA	NA	NA	NA	ENSMUSG00000026087	protein_coding	130.242	0.117206	198.671	0.104347
	XLOC_000193	1	37973966	37974203	+	lncRNA	NA	TRUE	none	237	237	NA	lncRNA	0	0	0	0	0	0	0	0	0	0	no	NA	NA	NA	NA	NA	Ensembl_ENSMUSG00000089141	lncRNA	NA	NA	NA	NA
	XLOC_000194	1	37998009	38055579	+	protein_coding	NA	FALSE	protein_coding	7797	353	3.69877	protein_coding	1045.68	1173.1	1470.51	1359.41	1498.52	1669.02	1215.45	1510.96	1088.2	1134.76	no	mRNA	NA	NA	NA	NA	ENSMUSG00000026083	protein_coding	324.963	-0.155399	395.259	-0.215522
	XLOC_000195	1	38158845	38159891	+	lncRNA	NA	TRUE	none	556	154	NA	lncRNA	0	0	0	0	0	0	0	0	0	0	no	NA	NA	NA	NA	NA	Necsulea_Locus_80445	lncRNA	NA	NA	NA	NA
	XLOC_000196	1	38939148	38950278	+	protein_coding	NA	FALSE	none	1003	40	NA	protein_coding	0	0	0.88799	0	0	0	0	0	0	0.965752	no	NA	NA	NA	NA	NA	ENSMUSG00000067604	protein_coding	NA	NA	NA	NA
	XLOC_000197	1	38987806	38997236	+	protein_coding	NA	FALSE	protein_coding	1713	166	3.08392	protein_coding	404.16	297.047	396.931	418.756	305.948	291.92	402.663	369.301	277.047	303.246	yes	mRNA	14	90	9	248	ENSMUSG00000026078	protein_coding	94.3525	-0.0345365	169.175	-0.00851385
	XLOC_000198	1	39193730	39363234	+	protein_coding	processed_pseudogene	FALSE	none	4513	223	NA	protein_coding	6.41523	2.32068	2.66397	1.03142	4.16255	3.17304	5.59255	4.96372	6.66437	2.89726	no	NA	NA	NA	NA	NA	ENSMUSG00000026077	protein_coding	NA	NA	NA	NA
	XLOC_000199	1	39314898	39315453	+	processed_pseudogene	protein_coding	FALSE	none	555	0	0.875696	protein_coding	1.83292	0	0	1.03142	0	1.05768	0	0	0	0.965752	no	NA	NA	NA	NA	NA	ENSMUSG00000092563	processed_pseudogene	NA	NA	NA	NA
	XLOC_000200	1	39364154	39371908	+	protein_coding	NA	FALSE	protein_coding	1348	183	0.861865	protein_coding	13606.7	10982.6	9441.99	9813.96	6933.77	7742.22	8277.9	5802.59	8480.88	7677.73	yes	mRNA	18	380	138	652	ENSMUSG00000073702	protein_coding	24.5598	-1.05956	17.4657	-0.589414
	XLOC_000201	1	39519532	39519747	+	snoRNA	NA	FALSE	none	215	214	0.239121	lncRNA	0	0	0	0	0	0	0	0	0	0	no	NA	NA	NA	NA	NA	ENSMUSG00000065629	snoRNA	NA	NA	NA	NA
	XLOC_000202	1	39534991	39546881	+	protein_coding	NA	FALSE	protein_coding	3474	582	2.00855	protein_coding	748.749	431.646	590.513	627.103	410.011	469.61	347.67	345.475	272.287	369.883	yes	mRNA	11	172	25	90	ENSMUSG00000003135	protein_coding	27.4556	-0.0553558	29.8156	-0.19731
	XLOC_000203	1	39592299	39597809	+	lncRNA	NA	TRUE	none	256	0	NA	lncRNA	0	0	0	0	0	0	0	0	0	0	no	NA	NA	NA	NA	NA	Necsulea_CUFF.127215|Necsulea_Locus_80208	lncRNA	NA	NA	NA	NA
	XLOC_000204	1	39852452	39865295	+	lncRNA	lncRNA	TRUE	none	1036	160	NA	lncRNA	0	0	0	0	0	0	0	0	0	0	no	NA	NA	NA	NA	NA	Necsulea_Locus_82616|Necsulea_Locus_81719|Necsulea_Locus_80816|Necsulea_Locus_80846	lncRNA	NA	NA	NA	NA
	XLOC_000205	1	39855763	39857050	+	lncRNA	lncRNA	TRUE	none	688	136	NA	lncRNA	0	0	0	0	0	0	0	0	0	0	no	NA	NA	NA	NA	NA	Necsulea_Locus_82616|Necsulea_Locus_81719|Necsulea_Locus_80816|Necsulea_Locus_80846	lncRNA	NA	NA	NA	NA
	XLOC_000206	1	39900605	40026310	+	protein_coding	NA	FALSE	protein_coding	6452	599	0.407045	protein_coding	3155.38	3132.92	2390.47	3030.31	2801.4	3540.06	3257.66	3589.77	3877.71	4319.81	yes	mRNA	100	1710	66	247	ENSMUSG00000026074	protein_coding	61.8196	-0.221947	191.521	-0.521113
	XLOC_000207	1	40033142	40034595	+	NA	NA	TRUE	lincRNA	1453	110	NA	lncRNA	0	0	0.88799	0	3.12191	5.2884	5.59255	12.9057	1.9041	7.72602	no	NA	NA	NA	NA	NA	NA	NA	NA	NA	NA	NA
	XLOC_000208	1	40038808	40039678	+	NA	NA	TRUE	none	870	24	NA	lncRNA	0	0	0	0	0	0	1.86418	3.97098	0.952052	5.79451	no	NA	NA	NA	NA	NA	NA	NA	NA	NA	NA	NA
	XLOC_000209	1	40084767	40125219	+	protein_coding	NA	FALSE	protein_coding	1404	0	NA	protein_coding	3.66585	9.28271	11.5439	10.3142	7.28447	1.05768	5.59255	0.992745	2.85616	3.86301	no	mRNA	NA	NA	NA	NA	ENSMUSG00000026073	protein_coding	NA	NA	NA	NA
	XLOC_000210	1	40148637	40152681	+	lncRNA	NA	TRUE	none	1308	251	NA	lncRNA	0	0	0	0	0	0	0	0	0	0	no	NA	NA	NA	NA	NA	Necsulea_Locus_81192	lncRNA	NA	NA	NA	NA
	XLOC_000211	1	40225079	40316198	+	protein_coding	NA	FALSE	protein_coding	5850	428	0.427107	protein_coding	1.83292	1.16034	7.10392	11.3456	8.3251	6.34609	105.326	86.3688	95.2052	65.6712	no	mRNA	NA	NA	NA	NA	ENSMUSG00000026072	protein_coding	NA	NA	158.006	0.796179
	XLOC_000212	1	40324626	40365471	+	protein_coding	NA	FALSE	none	1950	0	NA	protein_coding	0.916462	2.32068	2.66397	4.12568	3.12191	2.11536	0	0	0.952052	0.965752	no	mRNA	NA	NA	NA	NA	ENSMUSG00000070942	protein_coding	NA	NA	NA	NA
	XLOC_000213	1	40381194	40383652	+	lncRNA	NA	TRUE	none	809	18	NA	lncRNA	0	0	0	0	0	0	0	0	0	0	no	NA	NA	NA	NA	NA	Necsulea_Locus_81028	lncRNA	NA	NA	NA	NA
	XLOC_000214	1	40404841	40411585	+	lncRNA	NA	TRUE	none	408	0	NA	lncRNA	0	0	0	0	0	0	0	0	0	0	no	NA	NA	NA	NA	NA	Necsulea_Locus_81017	lncRNA	NA	NA	NA	NA
	XLOC_000215	1	40429569	40465415	+	protein_coding	NA	FALSE	none	6894	707	1.74993	protein_coding	0	0	0	0	2.08128	0	0	0	0	0	no	NA	NA	NA	NA	NA	ENSMUSG00000026069	protein_coding	NA	NA	NA	NA
	XLOC_000216	1	40465551	40500854	+	protein_coding	NA	FALSE	none	4750	463	0.36919	protein_coding	0.916462	0	0	0	3.12191	0	0.932091	0	0	0	no	NA	NA	NA	NA	NA	ENSMUSG00000026070	protein_coding	NA	NA	NA	NA
	XLOC_000217	1	40515361	40551705	+	protein_coding	NA	FALSE	none	4889	624	0.467845	protein_coding	0	0	0	0	0	0	1.86418	0	0	0	no	NA	NA	NA	NA	NA	ENSMUSG00000026068	protein_coding	NA	NA	NA	NA
	XLOC_000218	1	40580226	40630731	+	protein_coding	NA	FALSE	none	3822	0	NA	protein_coding	0	0	0	0	0	0	0	0	0	0	no	NA	NA	NA	NA	NA	ENSMUSG00000026065	protein_coding	NA	NA	NA	NA
	XLOC_000219	1	40681711	40768885	+	protein_coding	NA	FALSE	none	3493	26	NA	protein_coding	0.916462	3.48102	0	0	1.04064	2.11536	1.86418	1.98549	0.952052	0	no	NA	NA	NA	NA	NA	ENSMUSG00000026062	protein_coding	NA	NA	NA	NA
	XLOC_000220	1	40805600	40855944	+	protein_coding	NA	FALSE	none	1773	0	0.68934	protein_coding	0	0	0	0	0	0	0	0	0	0	no	NA	NA	NA	NA	NA	ENSMUSG00000079588	protein_coding	NA	NA	NA	NA
	XLOC_000221	1	40974430	40981508	+	lncRNA	NA	TRUE	none	1123	422	NA	lncRNA	0	0	0	0	0	0	0	0	0	0	no	NA	NA	NA	NA	NA	Necsulea_Locus_81026	lncRNA	NA	NA	NA	NA
	XLOC_000222	1	41390869	41391370	+	NA	NA	TRUE	none	501	0	NA	lncRNA	0	0	0	0	0	0	0.932091	0	5.71231	5.79451	no	NA	NA	NA	NA	NA	NA	NA	NA	NA	NA	NA
	XLOC_000223	1	41748323	41749615	+	lncRNA	NA	TRUE	lincRNA	1292	39	NA	lncRNA	0	0	0	0	0	0	0.932091	0.992745	0.952052	9.65752	no	NA	NA	NA	NA	NA	Necsulea_blastnHuman.ENSG00000232597|Necsulea_blastnXenopus.Locus_167764	lncRNA	NA	NA	NA	NA
	XLOC_000224	1	41758838	41759033	+	lncRNA	NA	TRUE	none	195	0	NA	lncRNA	0	0	0	0	0	0	0	0	0.952052	2.89726	no	NA	NA	NA	NA	NA	Necsulea_blastnPan.Locus_93540	TooShort	NA	NA	NA	NA
	XLOC_000225	1	41763279	41764517	+	NA	NA	TRUE	lincRNA	1238	89	NA	lncRNA	0	0	0	0	0	0	0	0	2.85616	8.69177	no	NA	NA	NA	NA	NA	NA	NA	NA	NA	NA	NA
	XLOC_000226	1	41783387	41784780	+	NA	NA	TRUE	none	1393	201	NA	lncRNA	0	0	0	0	0	0	0	0	0.952052	4.82876	no	NA	NA	NA	NA	NA	NA	NA	NA	NA	NA	NA
	XLOC_000227	1	41800599	41801286	+	NA	NA	TRUE	none	687	284	NA	lncRNA	0	0	0	0	0	0	0	0	0	6.76027	no	NA	NA	NA	NA	NA	NA	NA	NA	NA	NA	NA
	XLOC_000228	1	41801463	41803118	+	NA	NA	TRUE	lincRNA	1655	329	NA	lncRNA	0	0	0	0	0	0	1.86418	1.98549	4.76026	9.65752	no	NA	NA	NA	NA	NA	NA	NA	NA	NA	NA	NA
	XLOC_000229	1	41803912	41804977	+	NA	NA	TRUE	lincRNA	1065	388	NA	lncRNA	0	0	0	0	0	0	0	1.98549	0	9.65752	no	NA	NA	NA	NA	NA	NA	NA	NA	NA	NA	NA
	XLOC_000230	1	41837437	41939459	+	lncRNA	NA;lncRNA	TRUE	none	2236	232	NA	lncRNA	0	0	0	0	0	0	2.79627	0.992745	11.4246	35.7328	no	NA	NA	NA	NA	NA	Necsulea_blastnHuman.ENSG00000256637	lncRNA	NA	NA	NA	NA
	XLOC_000231	1	41900432	41901218	+	NA	lncRNA	TRUE	none	786	0	NA	lncRNA	0	0	0	0	0	0	0	0.992745	0	9.65752	no	NA	NA	NA	NA	NA	NA	NA	NA	NA	NA	NA
	XLOC_000232	1	41918468	41918723	+	lncRNA	lncRNA	TRUE	none	212	0	NA	lncRNA	0	0	0	0	0	0	0	0	0.952052	0.965752	no	NA	NA	NA	NA	NA	Necsulea_blastnHuman.ENSG00000256637	lncRNA	NA	NA	NA	NA
	XLOC_000233	1	42108575	42108981	+	lncRNA	NA	TRUE	none	245	0	NA	lncRNA	0	0	0	0	0	0	0	0	0	0.965752	no	NA	NA	NA	NA	NA	Necsulea_Locus_80996	lncRNA	NA	NA	NA	NA
	XLOC_000234	1	42229725	42231108	+	protein_coding	NA	FALSE	none	1383	81	NA	lncRNA	0	0	0	0	0	0	0	0	0	0	no	NA	NA	NA	NA	NA	ENSMUSG00000053640	protein_coding	NA	NA	NA	NA
	XLOC_000235	1	42233270	42233415	+	lncRNA	NA	FALSE	none	145	0	NA	lncRNA	0	0	0	0	0	0	0	0	0	0	no	NA	NA	NA	NA	NA	Necsulea_blastnMacaque.Locus_60961	Overlap	NA	NA	NA	NA
	XLOC_000236	1	42295664	42304890	+	lncRNA	NA	TRUE	none	3608	410	NA	lncRNA	0	0	0	0	0	0	0	0	0	0	no	NA	NA	NA	NA	NA	Necsulea_Locus_81450	lncRNA	NA	NA	NA	NA
	XLOC_000237	1	42440509	42440619	+	lncRNA	NA	TRUE	none	110	0	NA	lncRNA	0	0	0	0	0	0	0	0	0	0	no	NA	NA	NA	NA	NA	Necsulea_blastnHuman.ENSG00000236109	TooShort	NA	NA	NA	NA
	XLOC_000238	1	42493449	42494703	+	lncRNA	NA	TRUE	none	1004	439	NA	lncRNA	0	0	0	0	0	0	0	0	0	2.89726	no	NA	NA	NA	NA	NA	Necsulea_CUFF.127423	lncRNA	NA	NA	NA	NA
	XLOC_000239	1	42523249	42523333	+	lncRNA	NA	TRUE	none	84	0	NA	lncRNA	0	0	0	0	0	0	0	0	0	0	no	NA	NA	NA	NA	NA	Necsulea_blastnPan.Locus_93380	TooShort	NA	NA	NA	NA
	XLOC_000240	1	42541267	42541414	+	lncRNA	NA	TRUE	none	147	0	NA	lncRNA	0	0	0	0	0	0	0	0	0	0	no	NA	NA	NA	NA	NA	Necsulea_blastnPan.Locus_93243	TooShort	NA	NA	NA	NA
	XLOC_000241	1	42572253	42586036	+	lncRNA	NA	TRUE	none	538	0	NA	lncRNA	0	0	0	0	0	0	0	0	0	0	no	NA	NA	NA	NA	NA	Necsulea_Locus_80631	lncRNA	NA	NA	NA	NA
	XLOC_000242	1	42686775	42687945	+	NA	NA	TRUE	lincRNA	1170	66	NA	lncRNA	0	0	0	0	0	0	0	0	10.4726	6.76027	no	NA	NA	NA	NA	NA	NA	NA	NA	NA	NA	NA
	XLOC_000243	1	42695585	42697000	+	NA	NA	FALSE	none	1336	168	NA	lncRNA	7.33169	12.7637	0	1.03142	1.04064	1.05768	30.759	41.6953	252.294	326.424	no	NA	NA	NA	NA	NA	NA	NA	NA	NA	NA	NA
	XLOC_000244	1	42697064	42702555	+	protein_coding	NA	FALSE	protein_coding	5491	797	NA	protein_coding	28.4103	19.7258	1.77598	3.09426	3.12191	2.11536	95.0733	81.4051	663.581	785.157	no	mRNA	NA	NA	NA	NA	ENSMUSG00000045515	protein_coding	NA	NA	19.8616	0.37983
	XLOC_000245	1	42703276	42707126	+	lncRNA	NA	FALSE	none	3850	205	NA	lncRNA	0	1.16034	0	0	0	0	7.45673	14.8912	29.5136	32.8356	no	NA	NA	NA	NA	NA	Guttman_lincRNA_228|Guttman_lincRNA_229|Guttman_lincRNA_230|Ensembl_ENSMUSG00000097063|Guttman_lincRNA_231	Overlap	NA	NA	NA	NA
	XLOC_000246	1	42708073	42709905	+	lncRNA	NA	TRUE	lincRNA	1832	28	NA	lncRNA	0	0	0	0	0	0	2.79627	5.95647	13.3287	5.79451	no	NA	NA	NA	NA	NA	Guttman_lincRNA_228|Guttman_lincRNA_229|Guttman_lincRNA_230|Ensembl_ENSMUSG00000097063|Guttman_lincRNA_231	Overlap	NA	NA	NA	NA
	XLOC_000247	1	42715024	42716704	+	NA	NA	TRUE	lincRNA	1680	622	NA	lncRNA	0	0	0	0	0	0	1.86418	1.98549	14.2808	8.69177	no	NA	NA	NA	NA	NA	NA	NA	NA	NA	NA	NA
	XLOC_000248	1	42851232	42905682	+	protein_coding	NA	FALSE	protein_coding	1418	0	1.71634	protein_coding	1129.08	879.537	795.639	662.171	481.815	508.745	463.249	449.713	501.732	452.938	yes	mRNA	13	128	29	158	ENSMUSG00000060679	protein_coding	129.528	-0.117877	96.592	0.0050622
	XLOC_000249	1	42909779	42910720	+	NA	NA	FALSE	none	941	0	NA	lncRNA	1.83292	1.16034	0	1.03142	4.16255	0	4.66046	8.9347	3.80821	0.965752	no	NA	NA	NA	NA	NA	NA	NA	NA	NA	NA	NA
	XLOC_000250	1	42912089	42913760	+	NA	NA	TRUE	lincRNA	1671	54	NA	lncRNA	1.83292	0	0	0	4.16255	2.11536	2.79627	10.9202	6.66437	1.9315	no	NA	NA	NA	NA	NA	NA	NA	NA	NA	NA	NA
	XLOC_000251	1	42952871	43035449	+	protein_coding	NA	FALSE	none	7058	388	0.146335	protein_coding	0.916462	2.32068	3.55196	7.21994	6.24383	6.34609	14.9135	28.7896	31.4177	25.1096	no	mRNA	NA	NA	NA	NA	NA	NA	NA	NA	NA	NA
	XLOC_000252	1	43036844	43036929	+	miRNA	NA	FALSE	none	85	84	NA	lncRNA	0	0	0	0	0	0	0	0	0	0	no	NA	NA	NA	NA	NA	ENSMUSG00000089088	miRNA	NA	NA	NA	NA
	XLOC_000253	1	43092587	43093835	+	protein_coding	NA	FALSE	protein_coding	1248	70	NA	lncRNA	1.83292	0	0	4.12568	5.20319	2.11536	0	6.94921	7.61642	2.89726	no	NA	NA	NA	NA	NA	ENSMUSG00000041878	protein_coding	NA	NA	NA	NA
	XLOC_000254	1	43098709	43115947	+	protein_coding	NA	FALSE	protein_coding	3458	0	0.434328	protein_coding	773.494	646.309	576.305	527.055	386.077	499.225	562.983	424.895	580.752	577.52	yes	mRNA	18	98	43	180	ENSMUSG00000010290	protein_coding	49.464	0.105613	50.5503	0.371739
	XLOC_000255	1	43189155	43189638	+	processed_pseudogene	NA	FALSE	none	483	42	0.553917	protein_coding	0	0	0	0	0	0	0	0	0	0	no	NA	NA	NA	NA	NA	ENSMUSG00000094497	processed_pseudogene	NA	NA	NA	NA
	XLOC_000256	1	43445750	43570572	+	protein_coding	NA	FALSE	protein_coding	5348	245	0.249956	protein_coding	424.322	410.76	268.173	325.929	391.28	329.996	683.223	691.943	673.101	726.246	yes	mRNA	6	69	32	151	ENSMUSG00000066877	protein_coding	13.4988	-0.0356084	107.017	-0.167016
	XLOC_000257	1	43680667	43695950	+	lncRNA	NA	TRUE	none	1233	165	NA	lncRNA	0	0	0	0	0	0	0	0	0	0	no	NA	NA	NA	NA	NA	Necsulea_CUFF.127545	lncRNA	NA	NA	NA	NA
	XLOC_000258	1	43730601	43742578	+	protein_coding	NA	FALSE	none	902	0	NA	protein_coding	0.916462	1.16034	4.43995	5.1571	3.12191	1.05768	0	0.992745	0	0	no	NA	NA	NA	NA	NA	ENSMUSG00000026051	protein_coding	NA	NA	NA	NA
	XLOC_000259	1	43785909	43787188	+	processed_pseudogene	NA	FALSE	none	1279	0	1.87419	lncRNA	0	0	0	0	1.04064	0	0	0	0	0	no	NA	NA	NA	NA	NA	ENSMUSG00000090243	processed_pseudogene	NA	NA	NA	NA
	XLOC_000260	1	43902927	43903052	+	snoRNA	NA	FALSE	none	125	0	NA	lncRNA	0	0	0	0	0	0	0	0	0	0	no	NA	NA	NA	NA	NA	ENSMUSG00000088848	snoRNA	NA	NA	NA	NA
	XLOC_000261	1	43933649	44002999	+	protein_coding	NA	FALSE	protein_coding	5045	35	2.28134	protein_coding	1963.06	2073.53	2684.39	2730.17	2122.9	2657.95	1879.1	1944.79	1997.41	1788.57	yes	mRNA	39	315	36	144	ENSMUSG00000041763	protein_coding	368.443	0.0316567	385.456	-0.299577
	XLOC_000262	1	44003279	44009434	+	protein_coding	NA	FALSE	protein_coding	6155	1613	NA	lncRNA	11.914	40.6119	34.6316	50.5396	152.974	82.4991	68.0427	143.948	62.8355	76.2944	no	mRNA	NA	NA	NA	NA	ENSMUSG00000047343	protein_coding	NA	NA	NA	NA
	XLOC_000263	1	44009989	44018563	+	protein_coding	NA	FALSE	protein_coding	8574	951	NA	lncRNA	7.33169	27.8481	32.8556	39.194	103.023	59.2301	76.4315	149.904	56.1711	66.6369	no	mRNA	NA	NA	NA	NA	ENSMUSG00000047343	protein_coding	NA	NA	NA	NA
	XLOC_000264	1	44020025	44020782	+	NA	NA	FALSE	none	757	64	NA	lncRNA	1.83292	1.16034	0	2.06284	2.08128	3.17304	7.45673	5.95647	0	1.9315	no	NA	NA	NA	NA	NA	NA	NA	NA	NA	NA	NA
	XLOC_000265	1	44118992	44144770	+	protein_coding	NA	FALSE	protein_coding	3948	76	0.623264	protein_coding	312.513	312.131	269.061	275.389	297.622	321.535	470.706	368.308	439.848	459.698	no	mRNA	NA	NA	NA	NA	ENSMUSG00000041684	protein_coding	25.0871	0.25058	63.0369	0.154184
	XLOC_000266	1	44147846	44181260	+	protein_coding	NA	FALSE	protein_coding	4135	41	1.68711	protein_coding	515.051	713.609	635.801	740.559	490.141	452.687	517.311	546.01	599.793	571.725	yes	mRNA	13	431	128	202	ENSMUSG00000026048	protein_coding	76.6484	0.105391	169.321	-0.0863486
	XLOC_000267	1	44212161	44213118	+	processed_pseudogene	NA	FALSE	none	957	0	0.465322	lncRNA	0	0	0	0	0	0	0	0	0	0	no	NA	NA	NA	NA	NA	ENSMUSG00000089703	processed_pseudogene	NA	NA	NA	NA
	XLOC_000268	1	44551510	44796833	+	nonsense_mediated_decay;protein_coding	processed_pseudogene	FALSE	none	3753	73	0.65889	protein_coding	130.138	103.27	75.4791	154.713	198.762	258.074	362.584	367.316	323.698	403.684	no	NA	NA	NA	NA	NA	ENSMUSG00000056870	nonsense_mediated_decay,protein_coding	10.1872	0.0110402	57.7467	0.158026
	XLOC_000269	1	44644278	44644698	+	processed_pseudogene	nonsense_mediated_decay;protein_coding	FALSE	none	420	0	0.624655	lncRNA	0	1.16034	0	1.03142	5.20319	4.23072	5.59255	10.9202	4.76026	7.72602	no	NA	NA	NA	NA	NA	ENSMUSG00000089877	processed_pseudogene	NA	NA	NA	NA
	XLOC_000270	1	45311537	45349706	+	protein_coding	NA	FALSE	protein_coding	5564	0	1.13769	protein_coding	0.916462	0	0.88799	9.28278	5.20319	15.8652	198.535	634.364	433.184	2258.89	no	NA	NA	NA	NA	NA	ENSMUSG00000026043	protein_coding	NA	NA	58.531	0.519545
	XLOC_000271	1	45746894	45747025	+	snoRNA	NA	FALSE	none	131	0	NA	lncRNA	0	0	0	0	0	0	0	0	0	0	no	NA	NA	NA	NA	NA	ENSMUSG00000065255	snoRNA	NA	NA	NA	NA
	XLOC_000272	1	45772961	45773164	+	lncRNA	NA	TRUE	none	203	0	NA	lncRNA	0	0	0	0	0	0	0	0	0	0	no	NA	NA	NA	NA	NA	Ensembl_ENSMUSG00000087764	lncRNA	NA	NA	NA	NA
	XLOC_000273	1	45795165	45823703	+	protein_coding	NA	FALSE	protein_coding	3179	0	0.886156	protein_coding	2974.83	2465.72	3435.63	2995.24	1599.46	1799.12	1454.99	1253.84	1218.63	1308.59	yes	mRNA	13	107	25	248	ENSMUSG00000025995	protein_coding	294.821	0.16285	268.473	0.0562614
	XLOC_000274	1	45826424	45827476	+	NA	NA	FALSE	none	1052	29	NA	lncRNA	2.74938	1.16034	0.88799	0	1.04064	5.2884	8.38882	2.97823	0.952052	3.86301	no	NA	NA	NA	NA	NA	NA	NA	NA	NA	NA	NA
	XLOC_000275	1	45981547	45982015	+	protein_coding	NA	FALSE	none	468	0	1.41879	protein_coding	0	0	0	0	0	0	0	0	0	0	no	NA	NA	NA	NA	NA	ENSMUSG00000070896	protein_coding	NA	NA	NA	NA
	XLOC_000276	1	46066616	46373550	+	protein_coding	NA	FALSE	protein_coding	12583	82	NA	protein_coding	3.66585	0	13.3198	15.4713	50.9913	40.1919	52.1971	97.289	69.4998	104.301	no	mRNA	NA	NA	NA	NA	ENSMUSG00000041144	protein_coding	NA	NA	NA	NA
	XLOC_000277	1	46374196	46374315	+	rRNA	NA	FALSE	none	119	119	0.255309	lncRNA	0	0	0	0	0	0	0	0	0	0	no	NA	NA	NA	NA	NA	ENSMUSG00000096047	rRNA	NA	NA	NA	NA
	XLOC_000278	1	46608960	46626111	+	protein_coding	NA	FALSE	none	612	0	NA	protein_coding	0	0	0	0	1.04064	0	0	0	0	0	no	NA	NA	NA	NA	NA	ENSMUSG00000095861	protein_coding	NA	NA	NA	NA
	XLOC_000279	1	47076903	47092437	+	lncRNA	NA	TRUE	none	416	406	NA	lncRNA	0	0	0	0	0	0	0.932091	0	0.952052	0	no	NA	NA	NA	NA	NA	Necsulea_CUFF.127780	lncRNA	NA	NA	NA	NA
	XLOC_000280	1	47315287	47349308	+	lncRNA	NA	TRUE	none	330	161	NA	lncRNA	0	0	0	0	0	0	0	0	0	0	no	NA	NA	NA	NA	NA	Necsulea_Locus_80350	lncRNA	NA	NA	NA	NA
	XLOC_000281	1	48881712	48882723	+	processed_pseudogene	NA	FALSE	none	1011	0	1.10596	protein_coding	0	0	0	0	0	0	0	0	0	0	no	NA	NA	NA	NA	NA	ENSMUSG00000097883	processed_pseudogene	NA	NA	NA	NA
	XLOC_000282	1	49095443	49095885	+	miRNA	NA	FALSE	none	442	0	NA	lncRNA	0	0	0	0	0	0	0	0	0	0	no	NA	NA	NA	NA	NA	ENSMUSG00000092790	miRNA	NA	NA	NA	NA
	XLOC_000283	1	49244615	49338246	+	protein_coding	NA	FALSE	none	528	139	NA	protein_coding	0	0	0	0	0	0	0	0	0	0	no	NA	NA	NA	NA	NA	ENSMUSG00000051616	protein_coding	NA	NA	NA	NA
	XLOC_000284	1	50559761	50560075	+	lncRNA	NA	TRUE	none	314	312	NA	lncRNA	0	0	0	0	0	0	0	0	0	0	no	NA	NA	NA	NA	NA	Ensembl_ENSMUSG00000084531	lncRNA	NA	NA	NA	NA
	XLOC_000285	1	50909961	51187270	+	protein_coding	miRNA	FALSE	none	5422	1102	NA	protein_coding	0	0	3.55196	7.21994	11.447	1.05768	6.52464	14.8912	11.4246	25.1096	no	NA	NA	NA	NA	NA	ENSMUSG00000026109	protein_coding	NA	NA	NA	NA
	XLOC_000286	1	51015312	51015413	+	miRNA	protein_coding	FALSE	none	101	101	NA	lncRNA	0	0	0	0	1.04064	0	0	0	0	0.965752	no	NA	NA	NA	NA	NA	ENSMUSG00000092906	miRNA	NA	NA	NA	NA
	XLOC_000287	1	51268064	51268732	+	lncRNA	NA	TRUE	none	578	79	NA	lncRNA	0	0	0	0	0	0	0	0	0	0	no	NA	NA	NA	NA	NA	Necsulea_Locus_80653	lncRNA	NA	NA	NA	NA
	XLOC_000288	1	51289125	51302959	+	protein_coding	NA	FALSE	none	3054	0	NA	protein_coding	0	0	2.66397	3.09426	0	0	6.52464	2.97823	1.9041	1.9315	no	mRNA	NA	NA	NA	NA	ENSMUSG00000045954	protein_coding	NA	NA	NA	NA
	XLOC_000289	1	51478662	51479262	+	NA	NA	FALSE	none	600	0	NA	lncRNA	4.58231	0	4.43995	3.09426	6.24383	5.2884	3.72837	3.97098	8.56847	6.76027	no	NA	NA	NA	NA	NA	NA	NA	NA	NA	NA	NA
	XLOC_000290	1	51622479	51646001	+	lncRNA	NA	TRUE	none	287	0	NA	lncRNA	0	0	0	0	0	0	0	0	0	0	no	NA	NA	NA	NA	NA	Necsulea_Locus_80201	lncRNA	NA	NA	NA	NA
	XLOC_000291	1	51717594	51718134	+	lncRNA	NA	TRUE	none	359	72	NA	lncRNA	0	0	0	0	0	0	0	0	0	0	no	NA	NA	NA	NA	NA	Necsulea_Locus_81123	lncRNA	NA	NA	NA	NA
	XLOC_000292	1	51929419	51929512	+	lncRNA	NA	TRUE	none	93	0	NA	lncRNA	0	0	0	0	0	0	0	0	0	0	no	NA	NA	NA	NA	NA	Necsulea_blastnMacaque.Locus_289762	TooShort	NA	NA	NA	NA
	XLOC_000293	1	51987147	52107188	+	protein_coding	NA	FALSE	protein_coding	3166	4	NA	protein_coding	77.8992	107.912	163.39	186.687	106.145	79.3261	18.6418	18.8622	5.71231	4.82876	no	mRNA	NA	NA	NA	NA	ENSMUSG00000062939	protein_coding	10.1948	-0.00341558	NA	NA
	XLOC_000294	1	52119437	52162190	+	protein_coding	NA	FALSE	protein_coding	5794	634	1.57119	protein_coding	232.781	280.802	276.165	200.095	123.836	164.998	130.493	92.3253	102.822	136.171	no	mRNA	NA	NA	NA	NA	ENSMUSG00000026104	protein_coding	16.956	-0.0509408	18.9666	0.196366
	XLOC_000295	1	52300465	52303299	+	lncRNA	NA	TRUE	none	298	0	NA	lncRNA	0	0	0	0	0	0	0	0	0	0	no	NA	NA	NA	NA	NA	Necsulea_Locus_80489	lncRNA	NA	NA	NA	NA
	XLOC_000296	1	52509090	52514375	+	lncRNA	NA	FALSE	none	379	22	NA	lncRNA	0	0	0	0	0	0	0.932091	0	0	0	no	NA	NA	NA	NA	NA	Necsulea_CUFF.128178	Overlap	NA	NA	NA	NA
	XLOC_000297	1	52630704	52654986	+	protein_coding	NA	FALSE	protein_coding	16044	3527	0.663318	protein_coding	287.769	348.102	223.773	204.221	529.685	352.208	309.454	357.388	321.794	294.554	yes	mRNA	28	248	35	129	ENSMUSG00000043015	protein_coding	10.1166	-0.149928	47.1328	0.0568109
	XLOC_000298	1	52845012	52922097	+	protein_coding	NA	FALSE	protein_coding	3000	867	2.73324	protein_coding	374.833	320.254	288.597	211.441	168.583	192.498	189.215	153.875	164.705	181.561	yes	mRNA	10	64	20	92	ENSMUSG00000041426	protein_coding	46.8851	0.0927274	44.7244	0.325101
	XLOC_000299	1	53061662	53068079	+	protein_coding	NA	FALSE	none	2682	0	NA	protein_coding	0.916462	0	0	0	0	0	0	0	0	0	no	NA	NA	NA	NA	NA	ENSMUSG00000026100	protein_coding	NA	NA	NA	NA
	XLOC_000300	1	53100049	53100150	+	snoRNA	NA	FALSE	none	101	8	NA	lncRNA	0	0	0	0	0	0	0	0	0	0	no	NA	NA	NA	NA	NA	ENSMUSG00000089334	snoRNA	NA	NA	NA	NA
	XLOC_000301	1	53297094	53310309	+	protein_coding	NA	FALSE	protein_coding	1910	0	0.692893	protein_coding	467.395	404.958	290.373	313.552	202.924	263.363	479.095	405.04	535.053	611.321	no	mRNA	NA	NA	NA	NA	ENSMUSG00000026097	protein_coding	51.1856	0.15799	129.071	0.157155
	XLOC_000302	1	53313623	53326343	+	nonsense_mediated_decay;protein_coding	NA	FALSE	none	2742	390	1.07318	protein_coding	212.619	186.815	226.437	179.467	135.283	196.729	171.505	166.781	136.143	157.418	no	NA	NA	NA	NA	NA	ENSMUSG00000026096	nonsense_mediated_decay,protein_coding	32.1294	0.0766638	62.6903	0.270304
	XLOC_000303	1	53709492	53711213	+	lncRNA	NA	FALSE	none	561	354	NA	lncRNA	0	0	0	0	0	0	0	0	0	0	no	NA	NA	NA	NA	NA	Necsulea_Locus_81124	Overlap	NA	NA	NA	NA
	XLOC_000304	1	53794054	53797851	+	lncRNA	NA	TRUE	none	570	523	NA	lncRNA	0	0	0	0	0	0	0	0	0	0	no	NA	NA	NA	NA	NA	Necsulea_Locus_80501	lncRNA	NA	NA	NA	NA
	XLOC_000305	1	53849423	53849495	+	miRNA	NA	FALSE	none	72	0	NA	lncRNA	0	0	0	0	0	0	0	0	0	0	no	NA	NA	NA	NA	NA	ENSMUSG00000098443	miRNA	NA	NA	NA	NA
	XLOC_000306	1	54250682	54368727	+	nonsense_mediated_decay;protein_coding	NA	FALSE	none	5805	627	NA	protein_coding	12.8305	18.5654	7.99191	12.377	74.9259	28.5574	58.7218	73.4631	55.219	50.2191	no	NA	NA	NA	NA	NA	ENSMUSG00000025983	nonsense_mediated_decay,protein_coding	NA	NA	NA	NA
	XLOC_000307	1	54606898	54607894	+	lncRNA	NA	TRUE	none	490	490	NA	lncRNA	0	0	0.88799	0	0	0	0	0	0	0	no	NA	NA	NA	NA	NA	Necsulea_CUFF.128589|Necsulea_Locus_80565	lncRNA	NA	NA	NA	NA
	XLOC_000308	1	54769217	54769322	+	miRNA	NA	FALSE	none	105	105	NA	lncRNA	0	0	0	0	0	0	0	0	0	0	no	NA	NA	NA	NA	NA	ENSMUSG00000089245	miRNA	NA	NA	NA	NA
	XLOC_000309	1	55027611	55028700	+	NA	NA	FALSE	none	1089	283	NA	lncRNA	12.8305	12.7637	5.32794	3.09426	7.28447	8.46145	13.0493	11.9129	23.8013	19.315	no	lncRNA	NA	NA	NA	NA	NA	NA	NA	NA	NA	NA
	XLOC_000310	1	55052769	55072701	+	protein_coding	NA	FALSE	protein_coding	1732	87	1.63301	protein_coding	393.162	272.68	218.445	203.19	85.3323	86.7298	81.0919	87.3616	88.5409	119.753	yes	mRNA	1	20	13	84	ENSMUSG00000025981	protein_coding	22.9294	0.0204918	18.1074	0.0032046
	XLOC_000311	1	55088131	55091307	+	protein_coding	NA	FALSE	none	774	0	1.68095	protein_coding	6690.17	5103.17	6182.18	5141.63	1931.42	2838.82	2207.19	1646.96	1628.96	1750.91	no	NA	NA	NA	NA	NA	ENSMUSG00000073676	protein_coding	277.176	-0.147653	180.78	-0.165835
	XLOC_000312	1	55127296	55128287	+	processed_pseudogene	NA	FALSE	none	991	148	NA	protein_coding	0	0	0	0	0	0	0	0	0	0	no	NA	NA	NA	NA	NA	ENSMUSG00000089670	processed_pseudogene	NA	NA	NA	NA
	XLOC_000313	1	55131230	55154899	+	nonsense_mediated_decay;protein_coding	NA	FALSE	none	3106	303	1.07336	protein_coding	705.675	579.009	789.423	969.535	625.423	712.877	624.501	565.865	638.827	759.081	no	NA	NA	NA	NA	NA	ENSMUSG00000025979	nonsense_mediated_decay,protein_coding	157.217	-0.043142	247.071	0.00356669
	XLOC_000314	1	55161460	55162641	+	NA	NA	FALSE	none	1181	501	NA	lncRNA	1.83292	2.32068	1.77598	3.09426	7.28447	3.17304	5.59255	3.97098	4.76026	4.82876	no	lncRNA	NA	NA	NA	NA	NA	NA	NA	NA	NA	NA
	XLOC_000315	1	55237176	55247818	+	protein_coding	NA	FALSE	protein_coding	10642	1121	1.20328	protein_coding	538.879	344.621	321.452	318.709	218.534	218.94	234.887	272.012	266.575	325.459	yes	mRNA	13	86	38	72	ENSMUSG00000046994	protein_coding	11.8807	0.143153	NA	NA
	XLOC_000316	1	55335366	55335883	+	processed_pseudogene;pseudogene	NA	FALSE	none	517	3	0.497395	lncRNA	770.744	587.132	166.942	114.488	127.998	232.69	426.898	418.938	623.594	644.157	no	NA	NA	NA	NA	NA	ENSMUSG00000089944	processed_pseudogene,pseudogene	NA	NA	NA	NA
	XLOC_000317	1	55406387	55751802	+	protein_coding	NA	FALSE	protein_coding	3630	102	NA	protein_coding	1.83292	3.48102	0	0	0	4.23072	13.0493	23.8259	32.3698	64.7054	no	NA	NA	NA	NA	NA	ENSMUSG00000038349	protein_coding	NA	NA	NA	NA
	XLOC_000318	1	55798797	55810358	+	lncRNA	NA	TRUE	none	399	57	NA	lncRNA	0	0	0	0	0	0	0	0	0	0	no	NA	NA	NA	NA	NA	Necsulea_Locus_81038	lncRNA	NA	NA	NA	NA
	XLOC_000319	1	56018358	56020203	+	lncRNA	NA	TRUE	none	1101	263	NA	lncRNA	0	0	0	0	0	0	0	0	0	0	no	NA	NA	NA	NA	NA	Necsulea_Locus_81149	lncRNA	NA	NA	NA	NA
	XLOC_000320	1	56168706	56168813	+	lncRNA	NA	TRUE	none	107	0	NA	lncRNA	0	0	0	0	0	0	0	0	0	0	no	NA	NA	NA	NA	NA	Necsulea_blastnGorilla.Locus_370709	TooShort	NA	NA	NA	NA
	XLOC_000321	1	56310961	56327615	+	lncRNA	NA	TRUE	none	393	22	NA	lncRNA	0	0	0	0	0	0	0	0	0	0	no	NA	NA	NA	NA	NA	Necsulea_Locus_80284	lncRNA	NA	NA	NA	NA
	XLOC_000322	1	57127292	57129404	+	lncRNA	NA	TRUE	none	2036	497	NA	lncRNA	0	0	0	0	0	0	0	0	0	0	no	NA	NA	NA	NA	NA	Necsulea_Locus_82348|Necsulea_Locus_80429	lncRNA	NA	NA	NA	NA
	XLOC_000323	1	57149820	57151186	+	lncRNA	NA	TRUE	none	1076	217	NA	lncRNA	0	0	0	0	0	0	0	0	0	0	no	NA	NA	NA	NA	NA	Necsulea_Locus_80253	lncRNA	NA	NA	NA	NA
	XLOC_000324	1	57152442	57154099	+	lncRNA	NA	TRUE	none	627	50	NA	lncRNA	0	0	0	0	0	0	0	0	0	0	no	NA	NA	NA	NA	NA	Necsulea_Locus_80701	lncRNA	NA	NA	NA	NA
	XLOC_000325	1	57318671	57325033	+	lncRNA	NA	TRUE	none	683	457	NA	lncRNA	0	0	0	0	0	0	0	0	0	0	no	NA	NA	NA	NA	NA	Necsulea_CUFF.128773	lncRNA	NA	NA	NA	NA
	XLOC_000326	1	57377619	57386165	+	protein_coding	NA	FALSE	protein_coding	4305	200	0.480805	protein_coding	397.744	297.047	149.182	116.55	120.714	114.23	144.474	121.115	138.048	136.171	no	mRNA	NA	NA	NA	NA	ENSMUSG00000038323	protein_coding	NA	NA	NA	NA
	XLOC_000327	1	57406170	57417953	+	protein_coding	NA	FALSE	protein_coding	3697	773	2.97201	protein_coding	289.602	210.021	214.893	253.729	132.161	179.806	178.029	164.796	180.89	202.808	yes	mRNA	2	85	19	205	ENSMUSG00000025971	protein_coding	30.3431	-0.340545	53.6726	-0.19549
	XLOC_000328	1	57467869	57468026	+	snRNA	NA	FALSE	none	157	157	NA	lncRNA	0	0	0	0	0	0	0	0	0	0	no	NA	NA	NA	NA	NA	ENSMUSG00000088353	snRNA	NA	NA	NA	NA
	XLOC_000329	1	57718665	57719685	+	lncRNA	NA	TRUE	none	279	0	NA	lncRNA	0	0	0	0	0	0	0	0	0	0	no	NA	NA	NA	NA	NA	Necsulea_Locus_80326	lncRNA	NA	NA	NA	NA
	XLOC_000330	1	57774161	57948394	+	protein_coding	NA	FALSE	protein_coding	4646	32	NA	protein_coding	121.889	87.0254	27.5277	110.362	69.7228	81.4414	38.2157	43.6808	33.3218	51.1849	yes	mRNA	0	30	5	32	ENSMUSG00000038305	protein_coding	NA	NA	NA	NA
	XLOC_000331	1	57995970	58025899	+	protein_coding	NA	FALSE	protein_coding	5026	52	1.50748	protein_coding	2653.16	2290.51	2058.36	1965.89	1529.74	1287.2	1235.02	994.73	1042.5	916.499	yes	mRNA	28	346	32	133	ENSMUSG00000026039	protein_coding	59.5277	-0.18752	105.07	-0.165615
	XLOC_000332	1	58029930	58106413	+	protein_coding	NA	FALSE	protein_coding	4423	0	0.883072	protein_coding	21.9951	23.2068	11.5439	8.25136	19.7721	5.2884	7.45673	6.94921	9.52052	5.79451	yes	mRNA	3	40	0	72	ENSMUSG00000063558	protein_coding	NA	NA	NA	NA
	XLOC_000333	1	58113135	58200725	+	protein_coding	NA	FALSE	protein_coding	4633	211	0.955185	protein_coding	65.9852	45.2532	15.0958	14.4399	0	5.2884	0	0	0	0.965752	no	mRNA	NA	NA	NA	NA	ENSMUSG00000064294	protein_coding	NA	NA	NA	NA
	XLOC_000334	1	58210396	58268597	+	protein_coding	NA	FALSE	none	4973	299	0.433026	protein_coding	3.66585	1.16034	12.4319	6.18852	3.12191	4.23072	13.9814	9.92745	14.2808	11.589	no	mRNA	NA	NA	NA	NA	ENSMUSG00000038242	protein_coding	NA	NA	13.8603	0.669053
	XLOC_000335	1	58278325	58379264	+	protein_coding	NA	FALSE	none	4776	0	NA	protein_coding	0	2.32068	0	0	0	1.05768	1.86418	0	0	0	no	NA	NA	NA	NA	NA	ENSMUSG00000079554	protein_coding	NA	NA	NA	NA
	XLOC_000336	1	58392894	58409832	+	protein_coding	NA	FALSE	protein_coding	6358	725	1.04255	protein_coding	10067.3	6890.09	10743.8	11130.1	4447.69	6186.38	4414.38	4483.24	3851.05	5231.48	yes	mRNA	28	328	69	227	ENSMUSG00000051223	protein_coding	1169.95	0.142096	534.13	0.0509185
	XLOC_000337	1	58445150	58481816	+	nonsense_mediated_decay;protein_coding	NA	FALSE	none	3859	203	1.8763	protein_coding	851.393	596.414	1055.82	1030.39	355.898	481.245	436.219	371.287	336.074	442.315	no	NA	NA	NA	NA	NA	ENSMUSG00000026036	protein_coding.neuron.differentiation	215.167	-0.0219081	90.0327	-0.00881247
	XLOC_000338	1	58505147	58517530	+	lncRNA	NA	FALSE	none	3945	2514	0.412014	lncRNA	3.66585	4.64136	0.88799	4.12568	12.4877	3.17304	9.32091	22.8331	16.1849	27.0411	no	NA	NA	NA	NA	NA	Ensembl_ENSMUSG00000085054	Overlap	NA	NA	NA	NA
	XLOC_000339	1	58586383	58595964	+	protein_coding	NA	FALSE	none	763	62	2.01942	protein_coding	820.233	566.246	596.729	527.055	254.956	374.419	382.157	231.31	329.41	358.294	no	NA	NA	NA	NA	NA	ENSMUSG00000026032	protein_coding	90.9632	-0.158201	133.887	0.126916
	XLOC_000340	1	58613908	58614025	+	NA	NA	TRUE	none	117	8	NA	lncRNA	0	0	0	0	0	0	0	0	0	0	no	NA	NA	NA	NA	NA	NA	NA	NA	NA	NA	NA
	XLOC_000341	1	58646607	58648317	+	protein_coding	NA	FALSE	protein_coding	1710	49	1.17997	lncRNA	458.231	302.849	381.836	388.845	283.054	346.919	233.023	275.983	258.006	280.068	no	mRNA	NA	NA	NA	NA	ENSMUSG00000059647	protein_coding	27.8177	-0.857166	24.2705	-0.607806
	XLOC_000342	1	58711404	58758884	+	protein_coding	NA	FALSE	protein_coding	8036	2716	0.103209	protein_coding	935.707	729.853	1441.21	911.775	620.22	644.128	450.2	311.722	520.773	423	yes	mRNA	9	63	35	109	ENSMUSG00000026031	protein_coding	12.1637	0.0638939	21.6419	-0.0521041
	XLOC_000343	1	58795373	58847503	+	protein_coding	NA	FALSE	protein_coding	2777	271	0.92193	protein_coding	21.0786	20.8861	35.5196	38.1625	22.894	70.8646	96.0054	114.166	44.7465	79.1917	yes	mRNA	3	28	5	31	ENSMUSG00000026029	protein_coding	11.2536	0.218478	17.1487	0.554621
	XLOC_000344	1	58973521	58995715	+	nonsense_mediated_decay;protein_coding	NA	FALSE	none	3503	341	0.673172	protein_coding	77.8992	82.3841	56.8313	55.6967	85.3323	116.345	160.32	114.166	181.842	165.144	no	NA	NA	NA	NA	NA	ENSMUSG00000026027	nonsense_mediated_decay,protein_coding	NA	NA	28.8644	0.0348129
	XLOC_000345	1	59070987	59071118	+	snoRNA	NA	FALSE	none	131	0	NA	lncRNA	0	0	0	0	0	0	0	0	0	0	no	NA	NA	NA	NA	NA	ENSMUSG00000077616	snoRNA	NA	NA	NA	NA
	XLOC_000346	1	59119832	59122139	+	protein_coding	NA	FALSE	protein_coding	2307	349	NA	lncRNA	1.83292	3.48102	1.77598	5.1571	8.3251	3.17304	10.253	14.8912	19.9931	14.4863	no	mRNA	NA	NA	NA	NA	ENSMUSG00000097573	protein_coding	NA	NA	NA	NA
	XLOC_000347	1	59237721	59238773	+	lncRNA	NA	FALSE	none	121	0	NA	lncRNA	0	0	0	0	1.04064	1.05768	0	0	0	0	no	NA	NA	NA	NA	NA	Guttman_lincRNA_245	Overlap	NA	NA	NA	NA
	XLOC_000348	1	59256905	59352993	+	protein_coding	NA	FALSE	none	2108	273	NA	protein_coding	0.916462	0	4.43995	3.09426	1.04064	0	1.86418	0.992745	0	0	no	mRNA	NA	NA	NA	NA	ENSMUSG00000026023	protein_coding	NA	NA	NA	NA
	XLOC_000349	1	59448960	59449996	+	lncRNA	NA	TRUE	none	317	0	NA	protein_coding	0.916462	0	1.77598	3.09426	2.08128	3.17304	0	0	1.9041	0	no	NA	NA	NA	NA	NA	Necsulea_blastnGorilla.Locus_370909	lncRNA	NA	NA	NA	NA
	XLOC_000350	1	59482146	59486947	+	protein_coding	NA	FALSE	protein_coding	4801	191	1.59666	protein_coding	324.427	309.811	1801.73	1724.53	2909.62	2171.42	2422.51	2279.34	2307.77	2045.46	yes	mRNA	69	627	75	513	ENSMUSG00000041075	protein_coding.stem.cell.maintenance	37.2376	-0.0953501	145.306	0.0196199
	XLOC_000351	1	59487957	59488572	+	lncRNA	NA	FALSE	none	615	95	NA	lncRNA	0	0	8.8799	10.3142	14.5689	9.51913	13.0493	17.8694	6.66437	10.6233	no	NA	NA	NA	NA	NA	Ensembl_ENSMUSG00000097819	Overlap	NA	NA	NA	NA
	XLOC_000352	1	59516263	59636413	+	protein_coding	NA	FALSE	none	3923	141	NA	protein_coding	10.0811	5.8017	19.5358	6.18852	3.12191	3.17304	1.86418	2.97823	4.76026	5.79451	no	mRNA	NA	NA	NA	NA	ENSMUSG00000047361	protein_coding	NA	NA	NA	NA
	XLOC_000353	1	59685005	59711510	+	protein_coding	snoRNA	FALSE	none	1976	163	2.27447	protein_coding	6177.87	4118.04	6866.82	6356.64	3035.54	3429	2731.96	2608.93	2460.1	2597.87	no	NA	NA	NA	NA	NA	ENSMUSG00000026020	protein_coding	701.17	0.0241441	605.521	-0.186245
	XLOC_000354	1	59691933	59692020	+	snoRNA	protein_coding	FALSE	none	87	0	0.11167	lncRNA	24.7445	15.0844	45.2875	26.8169	30.1785	37.0188	17.7097	23.8259	19.9931	25.1096	no	NA	NA	NA	NA	NA	ENSMUSG00000077345	snoRNA	NA	NA	NA	NA
	XLOC_000355	1	59692508	59692592	+	snoRNA	protein_coding	FALSE	none	84	0	0.122557	lncRNA	25.6609	20.8861	55.9433	35.0683	43.7068	29.6151	28.8948	30.7751	21.8972	12.5548	no	NA	NA	NA	NA	NA	ENSMUSG00000077358	snoRNA	NA	NA	NA	NA
	XLOC_000356	1	59704257	59704338	+	snoRNA	protein_coding	FALSE	none	81	0	0.0328953	lncRNA	10.0811	12.7637	24.8637	23.7227	17.6908	12.6922	15.8456	18.8622	14.2808	10.6233	no	NA	NA	NA	NA	NA	ENSMUSG00000089512	snoRNA	NA	NA	NA	NA
	XLOC_000357	1	59704789	59704873	+	snoRNA	protein_coding	FALSE	none	84	0	0.00472919	lncRNA	19.2457	8.12237	11.5439	9.28278	7.28447	7.40377	15.8456	10.9202	6.66437	5.79451	no	NA	NA	NA	NA	NA	ENSMUSG00000089093	snoRNA	NA	NA	NA	NA
	XLOC_000358	1	59725241	59726374	+	NA	NA	TRUE	lincRNA	1133	285	NA	lncRNA	6.41523	0	7.99191	5.1571	10.4064	4.23072	2.79627	7.94196	0.952052	0.965752	no	lncRNA	NA	NA	NA	NA	NA	NA	NA	NA	NA	NA
	XLOC_000359	1	59763423	59878142	+	protein_coding	NA	FALSE	protein_coding	12003	464	0.457628	protein_coding	257.526	576.689	476.85	613.695	1059.37	1062.97	1352.46	1492.1	1685.13	2065.74	yes	mRNA	16	411	29	299	ENSMUSG00000067336	protein_coding	NA	NA	36.4598	0.177864
	XLOC_000360	1	59878246	59881873	+	NA	NA	TRUE	lincRNA	3627	1172	0.414214	lncRNA	9.16462	8.12237	7.99191	15.4713	26.016	25.3843	42.8762	77.4341	40.9383	54.0821	no	lncRNA	NA	NA	NA	NA	NA	NA	NA	NA	NA	NA
	XLOC_000361	1	59882522	59888052	+	NA	NA	TRUE	lincRNA	5530	1271	NA	lncRNA	0.916462	1.16034	5.32794	8.25136	31.2191	13.7499	33.5553	102.253	29.5136	29.9383	no	lncRNA	NA	NA	NA	NA	NA	NA	NA	NA	NA	NA
	XLOC_000362	1	59896138	59897125	+	NA	NA	TRUE	none	987	288	NA	lncRNA	0	0	0	0	0	1.05768	0	7.94196	0.952052	1.9315	no	NA	NA	NA	NA	NA	NA	NA	NA	NA	NA	NA
	XLOC_000363	1	59912993	59985346	+	nonsense_mediated_decay;protein_coding	NA	FALSE	none	5702	417	0.510374	protein_coding	683.68	773.946	511.482	512.616	755.503	910.663	996.406	981.825	1120.57	1189.81	no	NA	NA	NA	NA	NA	ENSMUSG00000041040	nonsense_mediated_decay,protein_coding	18.6641	-0.103401	117.991	0.201228
	XLOC_000364	1	59986564	59989131	+	protein_coding	NA	FALSE	protein_coding	2567	746	NA	lncRNA	0.916462	6.96204	4.43995	5.1571	28.0972	25.3843	27.9627	33.7533	23.8013	13.5205	no	mRNA	NA	NA	NA	NA	ENSMUSG00000026018	protein_coding	NA	NA	NA	NA
	XLOC_000365	1	59991222	59997066	+	protein_coding	NA	FALSE	protein_coding	5844	1791	0.585786	lncRNA	10.0811	10.4431	3.55196	3.09426	39.5442	41.2496	48.4688	70.4849	39.9862	47.3219	no	mRNA	NA	NA	NA	NA	ENSMUSG00000026018	protein_coding	NA	NA	NA	NA
	XLOC_000366	1	60052038	60052237	+	NA	NA	TRUE	none	199	0	0.75795	protein_coding	2.74938	4.64136	3.55196	1.03142	4.16255	3.17304	7.45673	6.94921	7.61642	4.82876	no	NA	NA	NA	NA	NA	NA	NA	NA	NA	NA	NA
	XLOC_000367	1	60098246	60151032	+	nonsense_mediated_decay;protein_coding	processed_pseudogene	FALSE	none	2870	167	0.580183	protein_coding	106.31	76.5824	44.3995	52.6024	121.755	105.768	174.301	171.745	173.274	161.281	no	NA	NA	NA	NA	NA	ENSMUSG00000026017	nonsense_mediated_decay,protein_coding	NA	NA	15.3147	0.209332
	XLOC_000368	1	60117254	60117685	+	processed_pseudogene	nonsense_mediated_decay;protein_coding	FALSE	none	431	0	0.164389	lncRNA	0	3.48102	0.88799	0	2.08128	2.11536	0	3.97098	0.952052	0	no	NA	NA	NA	NA	NA	ENSMUSG00000082609	processed_pseudogene	NA	NA	NA	NA
	XLOC_000369	1	60180451	60338428	+	nonsense_mediated_decay;protein_coding	NA	FALSE	none	16361	1024	0.420665	protein_coding	1178.57	1719.62	1150.83	1262.46	2094.8	2121.71	2004	2198.93	1753.68	1583.83	no	NA	NA	NA	NA	NA	ENSMUSG00000073664	nonsense_mediated_decay,protein_coding	103.175	0.11243	292.518	0.00463084
	XLOC_000370	1	60341618	60343089	+	NA	NA	FALSE	none	1471	488	0.267377	lncRNA	2.74938	0	0.88799	0	3.12191	4.23072	0	7.94196	3.80821	0.965752	no	NA	NA	NA	NA	NA	NA	NA	NA	NA	NA	NA
	XLOC_000371	1	60343322	60388060	+	nonsense_mediated_decay;protein_coding	NA	FALSE	none	2286	326	2.07464	protein_coding	331.759	239.03	293.037	382.657	288.257	313.074	357.923	287.896	282.76	266.548	no	NA	NA	NA	NA	NA	ENSMUSG00000049439	nonsense_mediated_decay,protein_coding	37.3786	0.0677092	31.1301	0.130383
	XLOC_000372	1	60409582	60482171	+	protein_coding	NA	FALSE	protein_coding	6904	333	0.356504	protein_coding	935.707	1235.76	1237.86	1386.23	1283.11	1780.08	1496.94	1507.98	1643.24	1600.25	yes	mRNA	29	287	20	244	ENSMUSG00000026782	protein_coding	226.273	0.104708	534.073	-0.116145
	XLOC_000373	1	60537019	60537436	+	processed_pseudogene	NA	FALSE	none	417	0	NA	lncRNA	0	0	0	0	0	0	0	0	0	0	no	NA	NA	NA	NA	NA	ENSMUSG00000084400	processed_pseudogene	NA	NA	NA	NA
	XLOC_000374	1	60574095	60575270	+	lncRNA	NA	TRUE	none	424	155	NA	lncRNA	0	0	0	0	0	0	0	0	0	0	no	NA	NA	NA	NA	NA	Necsulea_CUFF.129660	lncRNA	NA	NA	NA	NA
	XLOC_000375	1	60596199	60607020	+	lncRNA	NA	FALSE	none	835	0	NA	lncRNA	0	0	0	0	0	0	0	0	0.952052	0.965752	no	NA	NA	NA	NA	NA	Necsulea_Locus_80804|Necsulea_Locus_81896	Overlap	NA	NA	NA	NA
	XLOC_000376	1	60700871	60701937	+	processed_pseudogene	NA	FALSE	none	737	5	NA	lncRNA	0	0	0	0	0	0	0	0	0	0	no	NA	NA	NA	NA	NA	ENSMUSG00000084151	processed_pseudogene	NA	NA	NA	NA
	XLOC_000377	1	60703917	60705656	+	processed_pseudogene;pseudogene	NA	FALSE	none	1739	52	1.8443	protein_coding	686.43	442.089	782.319	641.543	305.948	414.611	243.276	277.969	201.835	312.904	no	NA	NA	NA	NA	NA	ENSMUSG00000082209	processed_pseudogene,pseudogene	NA	NA	NA	NA
	XLOC_000378	1	60746357	60773359	+	protein_coding	NA	FALSE	none	4347	602	NA	protein_coding	1.83292	2.32068	0	1.03142	1.04064	0	0	0	0.952052	0	no	NA	NA	NA	NA	NA	ENSMUSG00000026012	protein_coding	NA	NA	NA	NA
	XLOC_000379	1	60792489	60793832	+	processed_pseudogene	NA	FALSE	none	793	0	NA	lncRNA	0	0	0	0	0	0	0	0	0	0	no	NA	NA	NA	NA	NA	ENSMUSG00000083118	processed_pseudogene	NA	NA	NA	NA
	XLOC_000380	1	60809115	60809942	+	processed_pseudogene	NA	FALSE	none	763	0	NA	lncRNA	0.916462	2.32068	1.77598	0	0	0	0	0	0	0	no	NA	NA	NA	NA	NA	ENSMUSG00000083355	processed_pseudogene	NA	NA	NA	NA
	XLOC_000381	1	60851303	60851855	+	NA	NA	TRUE	none	552	0	NA	lncRNA	9.16462	0	1.77598	0	0	0	0	0	0	0	no	NA	NA	NA	NA	NA	NA	NA	NA	NA	NA	NA
	XLOC_000382	1	60900897	60901422	+	processed_pseudogene	NA	FALSE	none	525	0	0.998588	lncRNA	0	0	0	0	0	0	0	0	0	0	no	NA	NA	NA	NA	NA	ENSMUSG00000081382	processed_pseudogene	NA	NA	NA	NA
	XLOC_000383	1	60909024	60915832	+	protein_coding	NA	FALSE	none	1933	0	NA	protein_coding	0.916462	0	0	0	1.04064	0	0	0	0	0	no	NA	NA	NA	NA	NA	ENSMUSG00000026011	protein_coding	NA	NA	NA	NA
	XLOC_000384	1	60921230	60943490	+	lncRNA	NA	FALSE	none	2088	486	NA	lncRNA	0	0	0	0	0	0	0	0	0	0	no	NA	NA	NA	NA	NA	Necsulea_Locus_80461	Overlap	NA	NA	NA	NA
	XLOC_000385	1	60977926	61000320	+	protein_coding	NA	FALSE	none	3430	363	NA	protein_coding	0	0	0	0	0	0	0	0	0	0	no	NA	NA	NA	NA	NA	ENSMUSG00000026009	protein_coding	NA	NA	NA	NA
	XLOC_000386	1	61075673	61076225	+	processed_pseudogene	NA	FALSE	none	552	0	0.671462	protein_coding	0	0	0	0	0	0	0	0	0	0	no	NA	NA	NA	NA	NA	ENSMUSG00000082804	processed_pseudogene	NA	NA	NA	NA
	XLOC_000387	1	61306635	61307746	+	lncRNA	NA	TRUE	none	502	131	NA	lncRNA	0	0	0	0	0	0	0	0	0	0	no	NA	NA	NA	NA	NA	Ensembl_ENSMUSG00000085248	lncRNA	NA	NA	NA	NA
	XLOC_000388	1	61378431	61395904	+	lncRNA	NA	TRUE	none	892	232	NA	lncRNA	0	0	0	0	0	0	0	0	0	0	no	NA	NA	NA	NA	NA	Ensembl_ENSMUSG00000085447|Necsulea_ENSMUSG00000085447	lncRNA	NA	NA	NA	NA
	XLOC_000389	1	61440100	61469475	+	lncRNA	NA	FALSE	none	658	199	NA	lncRNA	0	0	0	0	0	0	0	0	0	0	no	NA	NA	NA	NA	NA	Ensembl_ENSMUSG00000086408	Overlap	NA	NA	NA	NA
	XLOC_000390	1	61470440	61470543	+	snRNA	NA	FALSE	none	103	102	NA	lncRNA	0	0	0	0	0	0	0	0	0	0	no	NA	NA	NA	NA	NA	ENSMUSG00000089546	snRNA	NA	NA	NA	NA
	XLOC_000391	1	61546044	61546161	+	lncRNA	NA	TRUE	none	117	0	NA	lncRNA	0	0	0	0	0	0	0	0	0	0	no	NA	NA	NA	NA	NA	Necsulea_blastnHuman.ENSG00000237843	TooShort	NA	NA	NA	NA
	XLOC_000392	1	61638585	62642284	+	protein_coding	NA	FALSE	protein_coding	8828	423	NA	protein_coding	11.914	15.0844	3.55196	11.3456	33.3004	44.4226	339.281	451.699	455.081	597.801	no	mRNA	NA	NA	NA	NA	ENSMUSG00000052062	protein_coding	NA	NA	53.1068	0.272666
	XLOC_000393	1	62660838	62661716	+	processed_pseudogene	NA	FALSE	none	878	44	0.182105	lncRNA	0	0	0	1.03142	0	1.05768	0	0	0	0	no	NA	NA	NA	NA	NA	ENSMUSG00000084333	processed_pseudogene	NA	NA	NA	NA
	XLOC_000394	1	62703284	62818695	+	protein_coding	NA	FALSE	protein_coding	8373	334	1.32503	protein_coding	320.762	105.591	1036.28	607.506	340.289	271.824	481.891	508.285	635.019	725.28	yes	mRNA	5	170	23	191	ENSMUSG00000025969	protein_coding	29.4523	-0.234424	13.7305	0.000680152
	XLOC_000395	1	63032705	63032819	+	snoRNA	NA	FALSE	none	114	0	NA	lncRNA	0	0	0	0	0	0	0	0	0	0	no	NA	NA	NA	NA	NA	ENSMUSG00000088953	snoRNA	NA	NA	NA	NA
	XLOC_000396	1	63038213	63038581	+	processed_pseudogene	NA	FALSE	none	368	15	NA	lncRNA	0	0	0	0	0	0	0	0	0	0	no	NA	NA	NA	NA	NA	ENSMUSG00000081617	processed_pseudogene	NA	NA	NA	NA
	XLOC_000397	1	63073773	63074019	+	processed_pseudogene	NA	FALSE	none	246	0	0.673733	lncRNA	0	0	0	0	0	0	0	0	0	0	no	NA	NA	NA	NA	NA	ENSMUSG00000081429	processed_pseudogene	NA	NA	NA	NA
	XLOC_000398	1	63113150	63136694	+	nonsense_mediated_decay;protein_coding	NA	FALSE	none	22315	10623	0.170609	lncRNA	145.717	176.372	141.19	113.456	292.419	178.748	354.195	516.227	492.211	461.63	no	NA	NA	NA	NA	NA	ENSMUSG00000040865	nonsense_mediated_decay,protein_coding	76.4833	0.0587919	117.256	-0.186967
	XLOC_000399	1	63141481	63143062	+	NA	NA	FALSE	none	1581	250	NA	lncRNA	0	1.16034	0	0	2.08128	0	7.45673	11.9129	7.61642	3.86301	no	NA	NA	NA	NA	NA	NA	NA	NA	NA	NA	NA
	XLOC_000400	1	63176824	63180486	+	nonsense_mediated_decay;protein_coding	snoRNA	FALSE	none	2423	324	1.21663	protein_coding	18750.8	11399.2	18207.3	16706.9	9235.66	9604.8	9208.13	7012.75	8732.22	8555.6	no	NA	NA	NA	NA	NA	ENSMUSG00000025967	nonsense_mediated_decay,protein_coding	1516.84	-0.337364	1321.8	-0.276903
	XLOC_000401	1	63178676	63178754	+	snoRNA	nonsense_mediated_decay;protein_coding	FALSE	none	78	0	0.05648	lncRNA	13.7469	5.8017	13.3198	11.3456	5.20319	10.5768	8.38882	7.94196	7.61642	5.79451	no	NA	NA	NA	NA	NA	ENSMUSG00000064612	snoRNA	NA	NA	NA	NA
	XLOC_000402	1	63179003	63179135	+	snoRNA	nonsense_mediated_decay;protein_coding	FALSE	none	132	0	0.0104533	lncRNA	27.4938	13.9241	49.7274	43.3196	21.8534	19.0383	13.9814	13.8984	13.3287	6.76027	no	NA	NA	NA	NA	NA	ENSMUSG00000064602	snoRNA	NA	NA	NA	NA
	XLOC_000403	1	63180602	63182772	+	protein_coding	NA	FALSE	none	2170	761	NA	lncRNA	43.0737	25.5275	43.5115	51.571	41.6255	23.269	32.6232	36.7316	19.9931	15.452	no	NA	NA	NA	NA	NA	ENSMUSG00000046856	protein_coding	NA	NA	NA	NA
	XLOC_000404	1	63198030	63198156	+	miRNA	NA	FALSE	none	126	126	NA	lncRNA	0	0	0	0	1.04064	0	0	0	0.952052	0	no	NA	NA	NA	NA	NA	ENSMUSG00000094290	miRNA	NA	NA	NA	NA
	XLOC_000405	1	63200191	63316325	+	protein_coding	NA;lncRNA	FALSE	none	15082	1332	NA	protein_coding	822.066	949.157	3809.48	2953.99	3198.92	3973.71	2821.44	4069.26	2847.59	2495.5	no	NA	NA	NA	NA	NA	ENSMUSG00000027520	protein_coding	274.899	0.107815	300.819	0.348176
	XLOC_000406	1	63214602	63215258	+	NA	protein_coding	FALSE	none	656	0	NA	lncRNA	5.49877	5.8017	14.2078	7.21994	24.9753	9.51913	0	1.98549	0.952052	0	no	NA	NA	NA	NA	NA	NA	NA	NA	NA	NA	NA
	XLOC_000407	1	63217198	63217866	+	NA	protein_coding	FALSE	none	668	210	NA	lncRNA	6.41523	9.28271	17.7598	14.4399	21.8534	10.5768	1.86418	1.98549	0	0	no	NA	NA	NA	NA	NA	NA	NA	NA	NA	NA	NA
	XLOC_000408	1	63226325	63226769	+	NA	protein_coding	TRUE	none	444	48	NA	lncRNA	1.83292	2.32068	4.43995	9.28278	14.5689	9.51913	0.932091	0	0	0	no	NA	NA	NA	NA	NA	NA	NA	NA	NA	NA	NA
	XLOC_000409	1	63227951	63228944	+	NA	protein_coding	TRUE	none	993	454	0.224463	lncRNA	8.24815	8.12237	6.21593	12.377	33.3004	8.46145	0.932091	0.992745	0.952052	0.965752	no	NA	NA	NA	NA	NA	NA	NA	NA	NA	NA	NA
	XLOC_000410	1	63245433	63245781	+	NA	protein_coding	TRUE	none	348	163	NA	lncRNA	2.74938	2.32068	4.43995	3.09426	15.6096	2.11536	0	0	0	0	no	NA	NA	NA	NA	NA	NA	NA	NA	NA	NA	NA
	XLOC_000411	1	63246514	63247021	+	NA	protein_coding	TRUE	none	507	0	NA	lncRNA	2.74938	4.64136	7.10392	1.03142	17.6908	2.11536	0	0	0	0	no	NA	NA	NA	NA	NA	NA	NA	NA	NA	NA	NA
	XLOC_000412	1	63248012	63249169	+	NA	protein_coding	TRUE	none	1157	51	NA	lncRNA	2.74938	6.96204	24.8637	5.1571	19.7721	9.51913	10.253	4.96372	9.52052	6.76027	no	NA	NA	NA	NA	NA	NA	NA	NA	NA	NA	NA
	XLOC_000413	1	63252283	63252917	+	NA	protein_coding	TRUE	none	634	0	NA	lncRNA	2.74938	2.32068	9.76789	10.3142	15.6096	12.6922	4.66046	0.992745	1.9041	0.965752	no	NA	NA	NA	NA	NA	NA	NA	NA	NA	NA	NA
	XLOC_000414	1	63256827	63257378	+	NA	protein_coding	TRUE	none	551	258	NA	lncRNA	0.916462	3.48102	11.5439	3.09426	15.6096	3.17304	0	0.992745	0.952052	0	no	NA	NA	NA	NA	NA	NA	NA	NA	NA	NA	NA
	XLOC_000415	1	63257432	63271294	+	lncRNA	protein_coding	FALSE	none	1255	336	NA	lncRNA	3.66585	6.96204	25.7517	19.597	32.2598	6.34609	0.932091	2.97823	0	1.9315	no	NA	NA	NA	NA	NA	Guttman_lincRNA_261|Ensembl_ENSMUSG00000087561|Necsulea_ENSMUSG00000087561	Overlap	NA	NA	NA	NA
	XLOC_000416	1	63377463	63395917	+	lncRNA	NA	TRUE	none	663	75	NA	lncRNA	0	0	0	0	1.04064	0	0.932091	0.992745	0	0.965752	no	NA	NA	NA	NA	NA	Necsulea_CUFF.129372	lncRNA	NA	NA	NA	NA
	XLOC_000417	1	63439097	63445452	+	NA	NA	FALSE	none	410	169	NA	lncRNA	0.916462	1.16034	33.7436	4.12568	2.08128	1.05768	0.932091	0	0.952052	0	no	NA	NA	NA	NA	NA	NA	NA	NA	NA	NA	NA
	XLOC_000418	1	63445732	63597124	+	protein_coding	NA	FALSE	protein_coding	7823	299	NA	protein_coding	52.2383	60.3376	645.568	376.468	546.335	202.017	123.968	139.977	104.726	130.377	yes	mRNA	78	1062	192	403	ENSMUSG00000025964	protein_coding	42.3317	-0.0478256	NA	NA
	XLOC_000419	1	63671467	63671971	+	processed_pseudogene	NA	FALSE	none	504	0	NA	lncRNA	0	0	0	0	0	0	0	0	0	0	no	NA	NA	NA	NA	NA	ENSMUSG00000083066	processed_pseudogene	NA	NA	NA	NA
	XLOC_000420	1	63730613	63754896	+	protein_coding	NA	FALSE	protein_coding	4838	258	0.903786	protein_coding	832.147	597.575	1101.11	883.927	547.376	609.224	529.428	441.772	391.294	438.452	yes	mRNA	8	309	19	99	ENSMUSG00000025962	protein_coding	158.556	-0.0744332	104.832	0.184492
	XLOC_000421	1	63828611	63828852	+	lncRNA	NA	TRUE	none	156	0	NA	lncRNA	0	0	0	0	0	0	0	0	0	0	no	NA	NA	NA	NA	NA	Necsulea_blastnPan.CUFF.44239	TooShort	NA	NA	NA	NA
	XLOC_000422	1	63917847	63935932	+	unitary_pseudogene	NA	FALSE	none	998	38	NA	protein_coding	0	0	0	0	0	0	0	0	0	0	no	NA	NA	NA	NA	NA	ENSMUSG00000082373	unitary_pseudogene	NA	NA	NA	NA
	XLOC_000423	1	63964726	63968999	+	lncRNA	NA	TRUE	none	1432	269	NA	lncRNA	0	0	0	0	0	0	0	0	0	0	no	NA	NA	NA	NA	NA	Ensembl_ENSMUSG00000044689	lncRNA	NA	NA	NA	NA
	XLOC_000424	1	64019822	64020842	+	lncRNA	NA	TRUE	none	331	27	NA	lncRNA	0	0	0	0	0	0	0	0	0	0	no	NA	NA	NA	NA	NA	Necsulea_Locus_80764	lncRNA	NA	NA	NA	NA
	XLOC_000425	1	64121678	64124335	+	protein_coding	NA	FALSE	protein_coding	2657	196	0.530818	lncRNA	8.24815	4.64136	7.10392	20.6284	41.6255	47.5956	80.1599	108.209	166.609	151.623	no	mRNA	NA	NA	NA	NA	ENSMUSG00000025959	protein_coding	18.2112	-0.00742101	37.9742	-0.00868613
	XLOC_000426	1	64150200	64150665	+	processed_pseudogene	NA	FALSE	none	465	0	1.57821	protein_coding	0	0	0	0	0	0	0	0	0	0	no	NA	NA	NA	NA	NA	ENSMUSG00000086721	processed_pseudogene	NA	NA	NA	NA
	XLOC_000427	1	64396333	64396403	+	miRNA	NA	FALSE	none	70	70	NA	lncRNA	0	0	0	0	0	0	0	0	0	0	no	NA	NA	NA	NA	NA	ENSMUSG00000093228	miRNA	NA	NA	NA	NA
	XLOC_000428	1	64532596	64604547	+	protein_coding	NA	FALSE	protein_coding	8627	444	0.381117	protein_coding	941.206	813.398	1045.16	1445.02	1437.12	1594.98	1674.04	1760.14	1747.02	1967.24	yes	mRNA	28	217	43	373	ENSMUSG00000025958	protein_coding	76.9641	0.0995042	289.425	0.112669
	XLOC_000429	1	64617282	64619252	+	NA	NA	FALSE	none	1970	286	NA	lncRNA	6.41523	2.32068	1.77598	3.09426	7.28447	7.40377	12.1172	12.9057	29.5136	17.3835	no	lncRNA	NA	NA	NA	NA	NA	NA	NA	NA	NA	NA
	XLOC_000430	1	64680384	64725644	+	protein_coding	NA	FALSE	protein_coding	3282	244	0.110374	protein_coding	260.275	247.152	327.668	355.84	376.711	416.726	260.986	285.911	262.766	243.37	yes	mRNA	2	70	33	197	ENSMUSG00000070871	protein_coding	20.9913	-0.208656	23.8224	0.438472
	XLOC_000431	1	64934401	64934780	+	processed_pseudogene	NA	FALSE	none	379	0	NA	lncRNA	0	0	0	0	0	0	0	0	0	0	no	NA	NA	NA	NA	NA	ENSMUSG00000097264	processed_pseudogene	NA	NA	NA	NA
	XLOC_000432	1	65028079	65028732	+	processed_pseudogene	NA	FALSE	none	653	0	NA	lncRNA	0.916462	1.16034	1.77598	0	0	0	0	0	0	0	no	NA	NA	NA	NA	NA	ENSMUSG00000090042	processed_pseudogene	NA	NA	NA	NA
	XLOC_000433	1	65186666	65277175	+	protein_coding	NA	FALSE	protein_coding	9920	269	0.611378	protein_coding	1998.8	2552.75	1920.72	1769.92	2415.32	2079.4	1477.36	1487.13	1512.81	1398.41	no	mRNA	NA	NA	NA	NA	ENSMUSG00000025949	protein_coding	23.4708	-0.00138032	35.9959	-0.137502
	XLOC_000434	1	65282055	65389244	+	protein_coding	NA	FALSE	none	2582	168	NA	protein_coding	0	1.16034	0	1.03142	2.08128	2.11536	0	1.98549	0.952052	0	no	NA	NA	NA	NA	NA	ENSMUSG00000025946	protein_coding	NA	NA	NA	NA
	XLOC_000435	1	65552681	65552994	+	processed_pseudogene	NA	FALSE	none	313	97	1.11774	lncRNA	0	0	0	0	0	0	0	0	0	0	no	NA	NA	NA	NA	NA	ENSMUSG00000082774	processed_pseudogene	NA	NA	NA	NA
	XLOC_000436	1	65926521	65928307	+	protein_coding	NA	FALSE	none	625	0	NA	protein_coding	0	0	0	0	0	0	0	0	0	0	no	NA	NA	NA	NA	NA	ENSMUSG00000025945	protein_coding	NA	NA	NA	NA
	XLOC_000437	1	66003303	66004736	+	lncRNA	NA	TRUE	none	345	45	NA	lncRNA	0	0	0	0	0	0	0	0	0	0	no	NA	NA	NA	NA	NA	Necsulea_Locus_80382	lncRNA	NA	NA	NA	NA
	XLOC_000438	1	66033084	66033425	+	processed_pseudogene	NA	FALSE	none	341	0	NA	lncRNA	0	0	0	0	0	0	0	0	0	0	no	NA	NA	NA	NA	NA	ENSMUSG00000083242	processed_pseudogene	NA	NA	NA	NA
	XLOC_000439	1	66062964	66063376	+	processed_pseudogene	NA	FALSE	none	412	0	NA	lncRNA	0	0	0	0	0	0	0	0	0	0	no	NA	NA	NA	NA	NA	ENSMUSG00000083289	processed_pseudogene	NA	NA	NA	NA
	XLOC_000440	1	66151457	66163413	+	lncRNA	NA	TRUE	none	411	0	NA	lncRNA	0	0	0	0	0	0	0	0	0	0	no	NA	NA	NA	NA	NA	Necsulea_Locus_80695	lncRNA	NA	NA	NA	NA
	XLOC_000441	1	66175272	66442583	+	protein_coding	snoRNA;snRNA	FALSE	none	10816	91	NA	protein_coding	229.115	185.654	141.19	207.315	249.753	169.229	96.0054	120.122	768.306	1633.09	no	NA	NA	NA	NA	NA	ENSMUSG00000015222	protein_coding	20.3096	0.433115	NA	NA
	XLOC_000442	1	66305888	66306025	+	snoRNA	protein_coding	FALSE	none	137	0	NA	lncRNA	0	0	0	0	2.08128	2.11536	0	0	0	2.89726	no	NA	NA	NA	NA	NA	ENSMUSG00000088850	snoRNA	NA	NA	NA	NA
	XLOC_000443	1	66436081	66436232	+	snRNA	protein_coding	FALSE	none	151	143	NA	lncRNA	0	0	0	0	0	0	0	0	0	2.89726	no	NA	NA	NA	NA	NA	ENSMUSG00000065694	snRNA	NA	NA	NA	NA
	XLOC_000444	1	66468307	66699989	+	nonsense_mediated_decay;protein_coding	NA	FALSE	none	14519	405	NA	protein_coding	64.1523	34.8102	30.1916	35.0683	82.2104	37.0188	8.38882	1.98549	14.2808	32.8356	no	NA	NA	NA	NA	NA	ENSMUSG00000055567	nonsense_mediated_decay,protein_coding	NA	NA	NA	NA
	XLOC_000445	1	66700800	66769857	+	protein_coding;nonsense_mediated_decay	NA	FALSE	none	52051	14022	0.822141	protein_coding	3175.54	3165.41	2552.97	2174.23	2873.2	1945.08	1713.18	1952.73	1535.66	1373.3	no	NA	NA	NA	NA	NA	NA	NA	NA	NA	NA	NA
	XLOC_000446	1	66783912	66786445	+	processed_pseudogene	NA	FALSE	none	1359	0	NA	lncRNA	0	0	2.66397	0	7.28447	2.11536	4.66046	8.9347	2.85616	4.82876	no	NA	NA	NA	NA	NA	ENSMUSG00000082057	processed_pseudogene	NA	NA	NA	NA
	XLOC_000447	1	66856640	66856703	+	snRNA	NA	FALSE	none	63	63	NA	lncRNA	0	0	0	0	0	0	0	0	0	0	no	NA	NA	NA	NA	NA	ENSMUSG00000089420	snRNA	NA	NA	NA	NA
	XLOC_000448	1	66866796	66866926	+	snoRNA	NA	FALSE	none	130	0	NA	lncRNA	0	0	0	0	0	0	0	0	0	0	no	NA	NA	NA	NA	NA	ENSMUSG00000077328	snoRNA	NA	NA	NA	NA
	XLOC_000449	1	66951828	66953469	+	processed_pseudogene	NA	FALSE	none	1384	0	NA	lncRNA	0	0	0	0	0	0	0	0	0	0	no	NA	NA	NA	NA	NA	ENSMUSG00000082212	processed_pseudogene	NA	NA	NA	NA
	XLOC_000450	1	67123025	67231259	+	protein_coding	NA	FALSE	none	5555	0	NA	protein_coding	0	0	0	0	0	2.11536	23.3023	26.8041	6.66437	2.89726	no	NA	NA	NA	NA	NA	ENSMUSG00000025991	protein_coding	NA	NA	NA	NA
	XLOC_000451	1	67257223	67257352	+	snoRNA	NA	FALSE	none	129	0	NA	lncRNA	0	0	0	0	0	0	0	0	0	0	no	NA	NA	NA	NA	NA	ENSMUSG00000077745	snoRNA	NA	NA	NA	NA
	XLOC_000452	1	67585052	67587036	+	processed_pseudogene	NA	FALSE	none	1984	0	NA	lncRNA	0	0	0	0	0	0	0	0	0	0	no	NA	NA	NA	NA	NA	ENSMUSG00000082473	processed_pseudogene	NA	NA	NA	NA
	XLOC_000453	1	67616974	67617052	+	miRNA	NA	FALSE	none	78	78	NA	lncRNA	0	0	0	0	0	0	0	0	0	0	no	NA	NA	NA	NA	NA	ENSMUSG00000095282	miRNA	NA	NA	NA	NA
	XLOC_000454	1	67792480	67805324	+	lncRNA	NA	TRUE	none	526	153	NA	lncRNA	0	0	0	0	0	0	0	0	0	0	no	NA	NA	NA	NA	NA	Ensembl_ENSMUSG00000085075|Necsulea_ENSMUSG00000085075	lncRNA	NA	NA	NA	NA
	XLOC_000455	1	67840820	67842436	+	lncRNA	NA	TRUE	none	288	0	NA	lncRNA	0	0	0	0	0	0	0	0	0	0	no	NA	NA	NA	NA	NA	Necsulea_Locus_80456	lncRNA	NA	NA	NA	NA
	XLOC_000456	1	67973675	67973777	+	miRNA	NA	FALSE	none	102	102	NA	lncRNA	0	0	0	0	0	0	0	0	0	0	no	NA	NA	NA	NA	NA	ENSMUSG00000096031	miRNA	NA	NA	NA	NA
	XLOC_000457	1	68024242	68025896	+	lncRNA	NA	TRUE	none	709	169	NA	lncRNA	0	0	0	0	0	0	0	0	0	0	no	NA	NA	NA	NA	NA	Ensembl_ENSMUSG00000087329	lncRNA	NA	NA	NA	NA
	XLOC_000458	1	69437083	69437197	+	lncRNA	NA	TRUE	none	114	0	NA	lncRNA	0	0	0	0	0	0	0	0	0	0	no	NA	NA	NA	NA	NA	Necsulea_blastnGorilla.Locus_371042	TooShort	NA	NA	NA	NA
	XLOC_000459	1	69709127	69710630	+	lncRNA	NA	TRUE	none	259	194	NA	lncRNA	0	0	0	0	0	0	0	0	0	0	no	NA	NA	NA	NA	NA	Necsulea_blastnHuman.ENSG00000236193|Necsulea_Locus_80493	lncRNA	NA	NA	NA	NA
	XLOC_000460	1	69826987	70724942	+	nonsense_mediated_decay;protein_coding	snRNA	FALSE	none	4810	1556	NA	protein_coding	0.916462	4.64136	12.4319	8.25136	43.7068	33.8458	30.759	9.92745	15.2328	7.72602	no	NA	NA	NA	NA	NA	ENSMUSG00000053153	nonsense_mediated_decay,protein_coding	NA	NA	NA	NA
	XLOC_000461	1	70596814	70596921	+	snRNA	nonsense_mediated_decay;protein_coding	FALSE	none	107	107	NA	lncRNA	0	0	0	0	0	0	0	0	0	0	no	NA	NA	NA	NA	NA	ENSMUSG00000075952	snRNA	NA	NA	NA	NA
	XLOC_000462	1	70725714	70885397	+	protein_coding	NA	FALSE	none	4655	113	NA	protein_coding	0	0	0	0	0	0	0	0	0	0	no	NA	NA	NA	NA	NA	ENSMUSG00000045648	protein_coding.neuron.differentiation	NA	NA	NA	NA
	XLOC_000463	1	71557149	71579631	+	protein_coding	NA	FALSE	protein_coding	2845	241	2.50297	protein_coding	3148.05	2668.78	4813.79	4219.54	1717.05	2390.36	1402.8	1219.09	1078.68	1009.21	yes	mRNA	30	432	42	236	ENSMUSG00000026192	protein_coding	281.839	-0.0123525	104.388	-0.319241
	XLOC_000464	1	71652836	71662843	+	nonsense_mediated_decay;protein_coding	NA	FALSE	none	2091	204	0.585786	protein_coding	38.4914	42.9325	5.32794	5.1571	17.6908	14.8075	13.9814	20.8476	20.9452	12.5548	no	NA	NA	NA	NA	NA	ENSMUSG00000073652	nonsense_mediated_decay,protein_coding	NA	NA	NA	NA
	XLOC_000465	1	71731335	71733232	+	lncRNA	NA	TRUE	none	533	0	NA	lncRNA	0	0	0	0	0	0	0	0	0.952052	0	no	NA	NA	NA	NA	NA	Necsulea_Locus_80825	lncRNA	NA	NA	NA	NA
	XLOC_000466	1	71747537	71749112	+	lncRNA	NA	TRUE	none	395	327	NA	lncRNA	0	1.16034	0	0	0	0	0.932091	0	0	0.965752	no	NA	NA	NA	NA	NA	Necsulea_CUFF.129967	lncRNA	NA	NA	NA	NA
	XLOC_000467	1	71886786	71894156	+	lncRNA	NA	TRUE	none	4723	843	0.596661	lncRNA	0	0	0	0	0	1.05768	0	0	0	0	no	NA	NA	NA	NA	NA	Necsulea_Locus_81164|Necsulea_Locus_82629	lncRNA	NA	NA	NA	NA
	XLOC_000468	1	71941743	71941862	+	lncRNA	NA	TRUE	none	119	0	NA	lncRNA	0	0	0	0	0	0	0	0	0	0	no	NA	NA	NA	NA	NA	Necsulea_blastnHuman.ENSG00000230838	TooShort	NA	NA	NA	NA
	XLOC_000469	1	72004287	72004770	+	processed_pseudogene	NA	FALSE	none	483	0	1.71253	lncRNA	0	0	0	0	0	0	0	0	0	0.965752	no	NA	NA	NA	NA	NA	ENSMUSG00000059483	processed_pseudogene	NA	NA	NA	NA
	XLOC_000470	1	72226239	72226430	+	snRNA	NA	FALSE	none	191	187	NA	lncRNA	648.855	384.072	674.872	530.15	356.939	451.63	237.683	317.678	317.985	327.39	no	NA	NA	NA	NA	NA	ENSMUSG00000094655	snRNA	NA	NA	NA	NA
	XLOC_000471	1	72236945	72237136	+	snRNA	NA	FALSE	none	191	187	0.00415757	lncRNA	37.5749	16.2447	39.9595	31.974	32.2598	20.0959	29.8269	18.8622	49.5067	33.8013	no	NA	NA	NA	NA	NA	ENSMUSG00000094050	snRNA	NA	NA	NA	NA
	XLOC_000472	1	72244212	72244403	+	snRNA	NA	FALSE	none	191	185	0.00366628	lncRNA	9.16462	12.7637	18.6478	15.4713	9.36574	10.5768	16.7776	7.94196	19.041	18.3493	no	NA	NA	NA	NA	NA	ENSMUSG00000093956	snRNA	NA	NA	NA	NA
	XLOC_000473	1	72255007	72255198	+	snRNA	NA	FALSE	none	191	187	0.00268286	lncRNA	1538.74	1217.2	1082.46	938.592	867.892	989.989	732.624	809.087	1174.83	1025.63	no	NA	NA	NA	NA	NA	ENSMUSG00000093843	snRNA	NA	NA	NA	NA
	XLOC_000474	1	72284368	72303292	+	protein_coding	NA	FALSE	protein_coding	3242	383	NA	protein_coding	0	0	6.21593	6.18852	5.20319	3.17304	17.7097	6.94921	33.3218	80.1574	no	mRNA	NA	NA	NA	NA	ENSMUSG00000026188	protein_coding	NA	NA	NA	NA
	XLOC_000475	1	72307420	72394952	+	protein_coding	NA	FALSE	protein_coding	2555	0	1.96042	protein_coding	3851.89	3183.97	3227.84	2263.97	852.283	1098.93	797.87	736.617	539.814	686.65	yes	mRNA	50	897	74	139	ENSMUSG00000026187	protein_coding	266.994	0.142302	77.4083	0.164196
	XLOC_000476	1	72459498	72460027	+	processed_pseudogene	NA	FALSE	none	529	0	0.916761	protein_coding	0	0	0	0	0	0	0	0	0	0	no	NA	NA	NA	NA	NA	ENSMUSG00000085812	processed_pseudogene	NA	NA	NA	NA
	XLOC_000477	1	72583250	72635995	+	protein_coding	NA	FALSE	protein_coding	6080	522	1.26389	protein_coding	537.963	517.511	473.298	568.312	437.068	558.456	451.132	535.09	470.314	492.534	yes	mRNA	4	376	20	87	ENSMUSG00000039354	protein_coding	34.4199	-0.0835245	17.3927	-0.107483
	XLOC_000478	1	72711259	72718748	+	protein_coding	NA	FALSE	none	644	0	1.17131	protein_coding	17407.3	11523.3	13414.9	12166.6	5543.48	7125.6	6794.95	4505.08	7104.21	6902.23	no	NA	NA	NA	NA	NA	ENSMUSG00000046330	protein_coding	181.891	-0.487244	204.464	-0.486447
	XLOC_000479	1	72765702	72768088	+	lncRNA	NA	TRUE	none	359	118	NA	lncRNA	0.916462	0	0	0	1.04064	0	0	0	0	0	no	NA	NA	NA	NA	NA	Necsulea_Locus_81435	lncRNA	NA	NA	NA	NA
	XLOC_000480	1	72823812	72852479	+	protein_coding	NA	FALSE	protein_coding	1549	39	NA	protein_coding	3804.23	3511.19	3603.46	2906.54	4174	4491.97	8906.13	4833.68	6956.65	5535.69	yes	mRNA	14	101	59	322	ENSMUSG00000039323	protein_coding	31.892	-0.228117	241.985	0.16908
	XLOC_000481	1	73060350	73060649	+	lncRNA	NA	TRUE	none	255	0	NA	lncRNA	0	0	0	0	0	0	0	0	0	0.965752	no	NA	NA	NA	NA	NA	Necsulea_blastnGorilla.Locus_369948	lncRNA	NA	NA	NA	NA
	XLOC_000482	1	73176101	73177265	+	lncRNA	NA	TRUE	none	161	0	NA	lncRNA	0	0	0	0	0	0	0	0	0	0	no	NA	NA	NA	NA	NA	Necsulea_blastnMacaque.Locus_289183	TooShort	NA	NA	NA	NA
	XLOC_000483	1	73355160	73355961	+	lncRNA	NA	TRUE	none	250	0	NA	lncRNA	0	0	0	0	0	0	0	0	0	0	no	NA	NA	NA	NA	NA	Necsulea_Locus_80514	lncRNA	NA	NA	NA	NA
	XLOC_000484	1	73363851	73365181	+	lncRNA	NA	TRUE	none	291	99	NA	lncRNA	0	0	0	0	0	0	0	0	0	0	no	NA	NA	NA	NA	NA	Necsulea_Locus_80463	lncRNA	NA	NA	NA	NA
	XLOC_000485	1	73367036	73370825	+	lncRNA	NA	TRUE	none	469	0	NA	lncRNA	0	0	0	0	0	0	0	0	0	0	no	NA	NA	NA	NA	NA	Necsulea_CUFF.130178	lncRNA	NA	NA	NA	NA
	XLOC_000486	1	73392245	73392399	+	lncRNA	NA	TRUE	none	154	0	NA	lncRNA	0	0	0	0	0	0	0	0	0	0	no	NA	NA	NA	NA	NA	Ensembl_ENSMUSG00000098697	TooShort	NA	NA	NA	NA
	XLOC_000487	1	73516721	73516827	+	lncRNA	NA	TRUE	none	106	0	NA	lncRNA	0	0	0	0	0	0	0	0	0	0	no	NA	NA	NA	NA	NA	Necsulea_blastnOrangutan.Locus_11201	TooShort	NA	NA	NA	NA
	XLOC_000488	1	73763709	73763835	+	rRNA	NA	FALSE	none	126	57	NA	lncRNA	0	0	0	0	0	0	0	0	0	0	no	NA	NA	NA	NA	NA	ENSMUSG00000088666	rRNA	NA	NA	NA	NA
	XLOC_000489	1	74125540	74148223	+	protein_coding	NA	FALSE	none	2329	0	NA	protein_coding	0.916462	1.16034	0	1.03142	2.08128	1.05768	0	0	0	0.965752	no	NA	NA	NA	NA	NA	ENSMUSG00000061815	protein_coding	NA	NA	NA	NA
	XLOC_000490	1	74153988	74161238	+	protein_coding	NA	FALSE	protein_coding	3040	1134	0.0609843	protein_coding	72.4005	46.4136	153.622	92.8278	41.6255	43.3649	13.9814	7.94196	26.6575	20.2808	no	mRNA	NA	NA	NA	NA	ENSMUSG00000026180	protein_coding	NA	NA	NA	NA
	XLOC_000491	1	74212812	74212919	+	snRNA	NA	FALSE	none	107	97	0.485281	lncRNA	0	0	0	0	0	0	0	0	0	0	no	NA	NA	NA	NA	NA	ENSMUSG00000094768	snRNA	NA	NA	NA	NA
	XLOC_000492	1	74236496	74268209	+	protein_coding	NA	FALSE	protein_coding	1819	134	1.37991	protein_coding	1856.75	1484.07	1342.64	1445.02	1123.89	1486.04	1344.08	1149.6	1279.56	1269.96	yes	mRNA	26	226	71	244	ENSMUSG00000006304	protein_coding	161.691	-0.168629	284.324	0.135322
	XLOC_000493	1	74278549	74279624	+	protein_coding	NA	FALSE	none	1075	0	NA	protein_coding	0.916462	1.16034	2.66397	1.03142	1.04064	0	0.932091	2.97823	0	0.965752	no	mRNA	NA	NA	NA	NA	ENSMUSG00000064272	protein_coding	NA	NA	NA	NA
	XLOC_000494	1	74284929	74353694	+	protein_coding	NA	FALSE	protein_coding	3607	516	1.10156	protein_coding	450.899	372.469	256.629	226.912	191.477	174.517	176.165	186.636	175.178	183.493	yes	mRNA	10	86	6	90	ENSMUSG00000026179	protein_coding	36.3504	-0.396987	46.3595	-0.412385
	XLOC_000495	1	74362107	74386150	+	protein_coding	NA	FALSE	protein_coding	5268	948	0.520288	protein_coding	309.764	170.57	42.6235	29.9112	10.4064	11.6345	3.72837	0	2.85616	7.72602	no	mRNA	NA	NA	NA	NA	NA	NA	NA	NA	NA	NA
	XLOC_000496	1	74390505	74397295	+	protein_coding	miRNA	FALSE	none	3116	291	0.207711	protein_coding	364.752	204.22	155.398	327.991	291.379	386.054	416.645	521.191	353.211	416.239	no	NA	NA	NA	NA	NA	ENSMUSG00000026176	protein_coding.neuron.differentiation	NA	NA	28.1771	-0.398462
	XLOC_000497	1	74394309	74394394	+	miRNA	protein_coding	FALSE	none	85	0	NA	lncRNA	0.916462	2.32068	0	0	3.12191	1.05768	2.79627	1.98549	2.85616	3.86301	no	NA	NA	NA	NA	NA	ENSMUSG00000065468	miRNA	NA	NA	NA	NA
	XLOC_000498	1	74409375	74435559	+	protein_coding	NA	FALSE	protein_coding	3175	101	NA	protein_coding	23.828	27.8481	44.3995	52.6024	40.5849	44.4226	112.783	42.688	32.3698	12.5548	no	mRNA	NA	NA	NA	NA	ENSMUSG00000026175	protein_coding	NA	NA	NA	NA
	XLOC_000499	1	74506057	74530844	+	protein_coding	NA	FALSE	protein_coding	3270	31	0.867339	protein_coding	1661.54	1609.39	1624.13	1675.03	1202.98	1544.21	1060.72	1188.32	772.114	903.944	yes	mRNA	36	326	102	506	ENSMUSG00000026174	protein_coding	820.718	0.0942221	617.879	0.00424956
	XLOC_000500	1	74542887	74567794	+	nonsense_mediated_decay;protein_coding	NA	FALSE	none	5083	275	0.361302	protein_coding	14.6634	9.28271	7.99191	7.21994	18.7315	6.34609	9.32091	5.95647	6.66437	7.72602	no	NA	NA	NA	NA	NA	ENSMUSG00000026173	nonsense_mediated_decay,protein_coding	NA	NA	NA	NA
	XLOC_000501	1	74588288	74592443	+	protein_coding	NA	FALSE	protein_coding	2018	126	1.41458	protein_coding	323.511	273.84	303.692	257.855	129.039	159.71	171.505	137.992	153.28	159.349	yes	mRNA	6	147	19	85	ENSMUSG00000026172	protein_coding	35.5681	0.0593603	28.8837	-0.146104
	XLOC_000502	1	74601444	74636978	+	protein_coding	NA	FALSE	protein_coding	5584	0	0.863545	protein_coding	47.656	42.9325	48.8394	38.1625	57.2351	145.96	48.4688	82.3978	72.356	96.5752	no	mRNA	NA	NA	NA	NA	ENSMUSG00000033276	protein_coding	NA	NA	23.1543	0.303917
	XLOC_000503	1	74661664	74702386	+	protein_coding	NA	FALSE	protein_coding	9591	650	0.496761	protein_coding	1321.54	1489.88	2701.26	2851.88	2538.12	2241.23	2471.91	2790.61	2452.49	2220.26	yes	mRNA	83	1192	60	169	ENSMUSG00000033257	protein_coding	101.853	0.116443	175.814	-0.0329509
	XLOC_000504	1	74713573	74737890	+	protein_coding	NA	FALSE	protein_coding	1890	0	NA	protein_coding	4.58231	8.12237	22.1997	26.8169	36.4223	22.2113	15.8456	30.7751	29.5136	11.589	yes	mRNA	2	59	7	60	ENSMUSG00000026170	protein_coding	NA	NA	NA	NA
	XLOC_000505	1	74764797	74764890	+	lncRNA	NA	TRUE	none	93	0	NA	lncRNA	0	0	0	0	0	0	0	0	0	0	no	NA	NA	NA	NA	NA	Ensembl_ENSMUSG00000098351	TooShort	NA	NA	NA	NA
	XLOC_000506	1	74771891	74785319	+	protein_coding	NA	FALSE	protein_coding	2068	101	NA	protein_coding	12.8305	3.48102	21.3117	7.21994	3.12191	5.2884	71.771	43.6808	78.0683	65.6712	no	mRNA	NA	NA	NA	NA	ENSMUSG00000033227	protein_coding.neuron.differentiation	NA	NA	NA	NA
	XLOC_000507	1	74791515	74804179	+	protein_coding	NA	FALSE	none	2468	56	NA	protein_coding	0	1.16034	0.88799	0	0	1.05768	0.932091	0.992745	0.952052	0	no	NA	NA	NA	NA	NA	ENSMUSG00000026167	protein_coding.neuron.differentiation	NA	NA	NA	NA
	XLOC_000508	1	74817006	74825928	+	lncRNA	NA	TRUE	lincRNA	1165	400	NA	lncRNA	0.916462	0	2.66397	4.12568	4.16255	1.05768	2.79627	1.98549	6.66437	5.79451	no	lncRNA	NA	NA	NA	NA	Necsulea_CUFF.130304	lncRNA	NA	NA	NA	NA
	XLOC_000509	1	74855028	74857732	+	protein_coding	NA	FALSE	protein_coding	2704	95	NA	protein_coding	8.24815	9.28271	4.43995	6.18852	108.226	16.9229	14.9135	9.92745	25.7054	34.7671	no	mRNA	NA	NA	NA	NA	ENSMUSG00000090071	protein_coding	NA	NA	NA	NA
	XLOC_000510	1	75124981	75125608	+	protein_coding	NA	FALSE	none	627	71	NA	lncRNA	0.916462	0	0	0	0	0	0.932091	1.98549	5.71231	0.965752	no	NA	NA	NA	NA	NA	ENSMUSG00000026205	protein_coding	NA	NA	NA	NA
	XLOC_000511	1	75142769	75148036	+	protein_coding	NA	FALSE	protein_coding	2700	225	1.01	protein_coding	170.462	245.992	238.869	210.41	321.557	325.766	444.608	378.236	415.095	521.506	no	mRNA	NA	NA	NA	NA	ENSMUSG00000049339	protein_coding	NA	NA	61.0251	0.19736
	XLOC_000512	1	75168645	75171629	+	protein_coding	NA	FALSE	protein_coding	1329	0	1.13436	protein_coding	217.201	145.042	124.319	103.142	73.8853	81.4414	86.6845	65.5212	65.6916	76.2944	yes	mRNA	0	50	21	74	ENSMUSG00000026197	protein_coding	13.5147	-0.0380713	19.0261	0.139175
	XLOC_000513	1	75192136	75199387	+	nonsense_mediated_decay;protein_coding	NA	FALSE	none	3071	26	0.88547	protein_coding	438.985	292.405	386.275	352.746	318.435	364.9	328.096	263.077	371.3	303.246	no	NA	NA	NA	NA	NA	ENSMUSG00000026199	nonsense_mediated_decay,protein_coding	10.0869	-0.349624	36.3026	-0.185559
	XLOC_000514	1	75210837	75215606	+	protein_coding	NA	FALSE	protein_coding	2967	0	0.373994	protein_coding	339.091	168.249	340.988	289.829	172.746	206.248	203.196	212.447	195.171	236.609	yes	mRNA	16	320	35	224	ENSMUSG00000026201	protein_coding	33.9217	0.107897	33.8858	-0.0120038
	XLOC_000515	1	75222215	75226433	+	protein_coding	NA	FALSE	protein_coding	4218	1268	NA	lncRNA	46.7395	13.9241	10.6559	8.25136	1.04064	2.11536	0.932091	0.992745	0.952052	1.9315	no	mRNA	NA	NA	NA	NA	ENSMUSG00000096094	protein_coding	NA	NA	NA	NA
	XLOC_000516	1	75236417	75245953	+	protein_coding	NA	FALSE	protein_coding	2449	86	0.854198	protein_coding	141.135	117.194	66.5992	82.5136	101.983	88.8452	132.357	149.904	178.034	197.013	yes	mRNA	4	340	46	94	ENSMUSG00000026203	protein_coding	NA	NA	NA	NA
	XLOC_000517	1	75360328	75368579	+	protein_coding	NA	FALSE	protein_coding	3028	117	1.28318	protein_coding	109.975	200.739	79.9191	115.519	123.836	62.4032	77.3636	35.7388	38.0821	57.9451	no	mRNA	NA	NA	NA	NA	ENSMUSG00000026208	protein_coding	NA	NA	NA	NA
	XLOC_000518	1	75375296	75432619	+	nonsense_mediated_decay;protein_coding	NA	FALSE	none	12454	179	0.449715	protein_coding	8.24815	29.0085	33.7436	121.708	240.387	245.382	321.572	489.423	359.876	419.137	no	NA	NA	NA	NA	NA	ENSMUSG00000026207	nonsense_mediated_decay,protein_coding	NA	NA	16.6873	-0.143644
	XLOC_000519	1	75435929	75443174	+	protein_coding	NA	FALSE	protein_coding	1973	6	0.927095	protein_coding	302.432	316.773	248.637	225.881	229.981	224.228	270.306	204.505	244.677	215.363	yes	mRNA	2	181	55	90	ENSMUSG00000033021	protein_coding	30.4079	0.0234565	41.0228	0.075721
	XLOC_000520	1	75449544	75474343	+	protein_coding	NA	FALSE	protein_coding	3618	66	NA	protein_coding	0	0	1.77598	0	7.28447	2.11536	21.4381	48.6445	129.479	236.609	no	NA	NA	NA	NA	NA	ENSMUSG00000033007	protein_coding	NA	NA	NA	NA
	XLOC_000521	1	75479531	75485705	+	protein_coding	NA	FALSE	protein_coding	2504	41	0.54758	protein_coding	9.16462	4.64136	2.66397	1.03142	3.12191	1.05768	10.253	7.94196	26.6575	32.8356	no	mRNA	NA	NA	NA	NA	ENSMUSG00000051703	protein_coding	NA	NA	NA	NA
	XLOC_000522	1	75507076	75510366	+	protein_coding	NA	FALSE	protein_coding	1475	0	NA	protein_coding	4.58231	9.28271	1.77598	4.12568	4.16255	7.40377	27.0306	39.7098	38.0821	40.5616	no	mRNA	NA	NA	NA	NA	ENSMUSG00000032968	protein_coding	NA	NA	NA	NA
	XLOC_000523	1	75518227	75537497	+	protein_coding	NA	FALSE	protein_coding	5070	272	0.845474	protein_coding	211.703	164.768	325.004	346.557	326.76	286.632	312.251	359.374	306.561	356.363	no	mRNA	NA	NA	NA	NA	ENSMUSG00000026213	protein_coding	16.4815	0.0765425	44.8262	0.129498
	XLOC_000524	1	75542210	75542558	+	processed_pseudogene	NA	FALSE	none	348	0	NA	lncRNA	0.916462	1.16034	0	0	2.08128	1.05768	0	1.98549	0	0	no	NA	NA	NA	NA	NA	ENSMUSG00000082059	processed_pseudogene	NA	NA	NA	NA
	XLOC_000525	1	75546265	75563455	+	nonsense_mediated_decay;protein_coding	NA	FALSE	none	9621	707	0.226385	protein_coding	26.5774	33.6498	65.7112	114.488	131.12	106.826	233.955	328.599	213.26	313.87	no	NA	NA	NA	NA	NA	ENSMUSG00000006576	nonsense_mediated_decay,protein_coding	NA	NA	NA	NA
	XLOC_000526	1	75568082	75568574	+	processed_pseudogene	NA	FALSE	none	492	0	NA	lncRNA	0	0	0	0	0	0	0	0	0	0	no	NA	NA	NA	NA	NA	ENSMUSG00000083244	processed_pseudogene	NA	NA	NA	NA
	XLOC_000527	1	75624653	75626329	+	processed_pseudogene	NA	FALSE	none	1676	183	NA	lncRNA	0	0	0	0	0	0	0	0	0	0	no	NA	NA	NA	NA	NA	ENSMUSG00000082528	processed_pseudogene	NA	NA	NA	NA
	XLOC_000528	1	75636389	75637179	+	processed_pseudogene	NA	FALSE	none	790	0	0.76915	lncRNA	0	0	0	0	0	0	0	0	0	0	no	NA	NA	NA	NA	NA	ENSMUSG00000082012	processed_pseudogene	NA	NA	NA	NA
	XLOC_000529	1	75759770	75764931	+	lncRNA	NA	TRUE	none	214	0	NA	lncRNA	0	0	0.88799	0	0	0	0	0	0	0	no	NA	NA	NA	NA	NA	Necsulea_Locus_80712	lncRNA	NA	NA	NA	NA
	XLOC_000530	1	76489066	76501446	+	lncRNA	NA	TRUE	none	1371	956	NA	lncRNA	0	0	0	0	0	0	0	0	0	0	no	NA	NA	NA	NA	NA	Necsulea_CUFF.130503|Necsulea_blastnGorilla.Locus_371145	lncRNA	NA	NA	NA	NA
	XLOC_000531	1	76509559	76509643	+	miRNA	NA	FALSE	none	84	0	NA	lncRNA	0	0	0	0	0	0	0	0	0	0	no	NA	NA	NA	NA	NA	ENSMUSG00000098611	miRNA	NA	NA	NA	NA
	XLOC_000532	1	76755260	76783124	+	lncRNA	NA	TRUE	none	544	226	NA	lncRNA	0	0	0	0	0	0	0	0	0	0	no	NA	NA	NA	NA	NA	Necsulea_blastnPan.CUFF.46221	lncRNA	NA	NA	NA	NA
	XLOC_000533	1	77144752	77144846	+	rRNA	NA	FALSE	none	94	88	NA	lncRNA	0	0	0	0	0	0	0	0	0	0	no	NA	NA	NA	NA	NA	ENSMUSG00000089326	rRNA	NA	NA	NA	NA
	XLOC_000534	1	77555091	77556423	+	lncRNA	NA	TRUE	none	712	0	NA	lncRNA	0	0	0.88799	0	0	0	0	0	0	0	no	NA	NA	NA	NA	NA	Necsulea_Locus_80771	lncRNA	NA	NA	NA	NA
	XLOC_000535	1	77592674	77592835	+	lncRNA	NA	TRUE	none	161	0	NA	lncRNA	0	0	0	0	0	0	0	0	0	0	no	NA	NA	NA	NA	NA	Necsulea_blastnOrangutan.Locus_11101	TooShort	NA	NA	NA	NA
	XLOC_000536	1	78310345	78420286	+	protein_coding	NA	FALSE	protein_coding	3998	126	NA	protein_coding	0	9.28271	0.88799	4.12568	5.20319	12.6922	63.3822	31.7678	27.6095	22.2123	no	NA	NA	NA	NA	NA	ENSMUSG00000032908	protein_coding	NA	NA	NA	NA
	XLOC_000537	1	78489195	78490783	+	NA	NA	FALSE	none	1588	641	0.585786	lncRNA	3.66585	1.16034	0	2.06284	3.12191	8.46145	5.59255	3.97098	13.3287	7.72602	no	NA	NA	NA	NA	NA	NA	NA	NA	NA	NA	NA
	XLOC_000538	1	78510990	78538173	+	protein_coding	NA	FALSE	none	1464	208	NA	protein_coding	0.916462	0	0.88799	2.06284	1.04064	5.2884	1.86418	0.992745	1.9041	0	no	NA	NA	NA	NA	NA	ENSMUSG00000012187	protein_coding	NA	NA	NA	NA
	XLOC_000539	1	78657824	78706987	+	protein_coding	NA	FALSE	protein_coding	9476	1358	1.56636	protein_coding	4209.31	3967.2	2413.56	2570.3	3044.91	3457.56	2785.09	2689.35	2468.67	2272.42	yes	mRNA	22	126	38	334	NA	NA	NA	NA	NA	NA
	XLOC_000540	1	78740812	78746212	+	lncRNA	NA	TRUE	none	1288	29	NA	lncRNA	0.916462	0	0	0	0	0	0	0	0.952052	0	no	NA	NA	NA	NA	NA	Necsulea_Locus_82596|Necsulea_Locus_80506	lncRNA	NA	NA	NA	NA
	XLOC_000541	1	78816948	78820024	+	protein_coding	NA	FALSE	none	2462	0	NA	protein_coding	0	0	0	0	0	0	0	0	0	0	no	NA	NA	NA	NA	NA	ENSMUSG00000047330	protein_coding	NA	NA	NA	NA
	XLOC_000542	1	79045607	79045701	+	miRNA	NA	FALSE	none	94	94	NA	lncRNA	0	0	0	0	0	0	0	0	0	0	no	NA	NA	NA	NA	NA	ENSMUSG00000098911	miRNA	NA	NA	NA	NA
	XLOC_000543	1	79426029	79427903	+	lncRNA	NA	TRUE	none	409	69	NA	lncRNA	0	0	0	0	0	0	0	0	0	0	no	NA	NA	NA	NA	NA	Necsulea_Locus_81571|Necsulea_Locus_81245	lncRNA	NA	NA	NA	NA
	XLOC_000544	1	79776017	79781445	+	protein_coding	NA	FALSE	protein_coding	1424	0	1.89064	protein_coding	617.695	502.427	693.52	629.166	304.907	435.765	388.682	287.896	382.725	354.431	yes	mRNA	14	94	22	65	ENSMUSG00000026248	protein_coding	151.846	-0.049345	126.885	0.141424
	XLOC_000545	1	80135465	80135572	+	snRNA	NA	FALSE	none	107	107	0.00741244	lncRNA	0	0	0	0	0	0	0	0	0	0	no	NA	NA	NA	NA	NA	ENSMUSG00000096297	snRNA	NA	NA	NA	NA
	XLOC_000546	1	80236404	80247440	+	lncRNA	NA	TRUE	none	211	0	NA	lncRNA	0	0	0	0	0	0	0	0	0	0	no	NA	NA	NA	NA	NA	Guttman_lincRNA_267	lncRNA	NA	NA	NA	NA
	XLOC_000547	1	80445899	80479812	+	lncRNA	NA	TRUE	none	2635	932	NA	lncRNA	0	0	0	0	0	0	0.932091	0.992745	0	0	no	NA	NA	NA	NA	NA	Necsulea_Locus_80288	lncRNA	NA	NA	NA	NA
	XLOC_000548	1	81076949	81341764	+	protein_coding	NA	FALSE	none	12508	839	0.50703	protein_coding	0.916462	1.16034	7.99191	5.1571	15.6096	4.23072	3.72837	4.96372	9.52052	7.72602	no	mRNA	NA	NA	NA	NA	ENSMUSG00000054976	protein_coding	NA	NA	NA	NA
	XLOC_000549	1	82131915	82132019	+	miRNA	NA	FALSE	none	104	0	NA	lncRNA	0	0	0	0	0	0	0	0	0	0	no	NA	NA	NA	NA	NA	ENSMUSG00000098797	miRNA	NA	NA	NA	NA
	XLOC_000550	1	82233111	82235933	+	protein_coding	NA	FALSE	none	2822	49	NA	lncRNA	0	0	0	0	0	0	0	0	0.952052	0	no	NA	NA	NA	NA	NA	ENSMUSG00000022591	protein_coding	NA	NA	NA	NA
	XLOC_000551	1	82316451	82445662	+	protein_coding	NA	FALSE	protein_coding	4227	247	1.74614	protein_coding	362.919	474.579	111.887	133.053	255.997	215.767	279.627	214.433	337.027	310.972	yes	mRNA	6	117	63	117	ENSMUSG00000026142	protein_coding	NA	NA	30.6024	0.244091
	XLOC_000552	1	82449041	82451132	+	NA	NA	FALSE	none	2091	19	NA	lncRNA	0	4.64136	0.88799	3.09426	12.4877	8.46145	11.1851	23.8259	10.4726	8.69177	no	NA	NA	NA	NA	NA	NA	NA	NA	NA	NA	NA
	XLOC_000553	1	82586975	82722059	+	nonsense_mediated_decay;protein_coding	rRNA	FALSE	none	8554	467	NA	protein_coding	0	0	0	0	0	0	0.932091	0	1.9041	0.965752	no	NA	NA	NA	NA	NA	ENSMUSG00000079465	nonsense_mediated_decay,protein_coding	NA	NA	NA	NA
	XLOC_000554	1	82635012	82635110	+	rRNA	nonsense_mediated_decay;protein_coding	FALSE	none	98	98	NA	lncRNA	0	0	0	0	0	0	0	0	0	0	no	NA	NA	NA	NA	NA	ENSMUSG00000065055	rRNA	NA	NA	NA	NA
	XLOC_000555	1	82724885	82755544	+	protein_coding	NA	FALSE	protein_coding	6601	996	0.623879	protein_coding	949.454	822.68	715.72	716.837	674.333	727.684	794.142	769.377	898.737	1015.01	yes	mRNA	25	61	20	96	ENSMUSG00000026150	protein_coding	31.1837	-0.0625338	109.328	0.0658744
	XLOC_000556	1	82809443	82816105	+	lncRNA	NA	TRUE	none	916	0	NA	lncRNA	0.916462	0	0	0	0	0	0	0	0.952052	0	no	NA	NA	NA	NA	NA	Necsulea_Locus_80733	lncRNA	NA	NA	NA	NA
	XLOC_000557	1	82839432	82908454	+	protein_coding;miRNA	NA	FALSE	none	15372	2256	0.548013	protein_coding	1760.52	1908.76	2175.57	2025.71	1974.09	1737.77	2223.04	2102.63	2069.76	2008.76	no	NA	NA	NA	NA	NA	NA	NA	NA	NA	NA	NA
	XLOC_000558	1	82908734	82913379	+	NA	NA	TRUE	lincRNA	4645	1074	NA	lncRNA	3.66585	5.8017	7.10392	2.06284	28.0972	14.8075	34.4874	60.5574	32.3698	22.2123	no	lncRNA	NA	NA	NA	NA	NA	NA	NA	NA	NA	NA
	XLOC_000559	1	82913753	82914943	+	NA	NA	TRUE	lincRNA	1190	34	NA	lncRNA	1.83292	0	2.66397	1.03142	7.28447	2.11536	9.32091	12.9057	5.71231	3.86301	no	lncRNA	NA	NA	NA	NA	NA	NA	NA	NA	NA	NA
	XLOC_000560	1	83116765	83119167	+	protein_coding	NA	FALSE	protein_coding	1421	104	NA	protein_coding	0	0	1.77598	6.18852	1.04064	19.0383	0	0	0	0	no	mRNA	NA	NA	NA	NA	ENSMUSG00000026166	protein_coding	NA	NA	NA	NA
	XLOC_000561	1	83159761	83210574	+	nonsense_mediated_decay;protein_coding	NA	FALSE	none	1670	8	NA	protein_coding	0	0	0	0	4.16255	0	3.72837	0	0.952052	0	no	NA	NA	NA	NA	NA	ENSMUSG00000053161	nonsense_mediated_decay,protein_coding	NA	NA	NA	NA
	XLOC_000562	1	83314512	83315300	+	processed_pseudogene	NA	FALSE	none	788	0	NA	protein_coding	1.83292	0	0	0	0	0	0	0.992745	0	0	no	NA	NA	NA	NA	NA	ENSMUSG00000079140	processed_pseudogene	NA	NA	NA	NA
	XLOC_000563	1	83795911	83796032	+	miRNA	NA	FALSE	none	121	121	NA	lncRNA	0	0	0	0	0	0	0	0	0	0	no	NA	NA	NA	NA	NA	ENSMUSG00000094946	miRNA	NA	NA	NA	NA
	XLOC_000564	1	83921917	83922041	+	snoRNA	NA	FALSE	none	124	0	NA	lncRNA	0	0	0	0	0	0	0	0	0	0	no	NA	NA	NA	NA	NA	ENSMUSG00000077736	snoRNA	NA	NA	NA	NA
	XLOC_000565	1	83922402	83924110	+	lncRNA	NA	FALSE	none	239	198	NA	lncRNA	0	0	0	0	0	0	0	0	0	0	no	NA	NA	NA	NA	NA	Necsulea_Locus_81415	Overlap	NA	NA	NA	NA
	XLOC_000566	1	84695838	84695915	+	miRNA	NA	FALSE	none	77	0	NA	lncRNA	0	0	0	0	0	0	0	0	0	0	no	NA	NA	NA	NA	NA	ENSMUSG00000093254	miRNA	NA	NA	NA	NA
	XLOC_000567	1	84839840	84900488	+	protein_coding	NA	FALSE	protein_coding	1711	809	NA	protein_coding	32.0762	15.0844	9.76789	8.25136	15.6096	15.8652	25.1665	10.9202	30.4657	20.2808	no	mRNA	NA	NA	NA	NA	ENSMUSG00000073633	protein_coding	NA	NA	15.5599	0.315164
	XLOC_000568	1	84963668	84964559	+	processed_pseudogene	NA	FALSE	none	891	0	NA	protein_coding	0	0	0.88799	0	0	0	0	0	0	0	no	NA	NA	NA	NA	NA	ENSMUSG00000096802	processed_pseudogene	NA	NA	NA	NA
	XLOC_000569	1	85012113	85012704	+	processed_pseudogene	NA	FALSE	none	591	0	1.43688	protein_coding	0	2.32068	0.88799	2.06284	0	1.05768	0.932091	0.992745	0.952052	0	no	NA	NA	NA	NA	NA	ENSMUSG00000064281	processed_pseudogene	NA	NA	NA	NA
	XLOC_000570	1	85061153	85062642	+	unprocessed_pseudogene	NA	FALSE	none	189	0	NA	protein_coding	0	0	0	0	0	0	0	0	0	0	no	NA	NA	NA	NA	NA	ENSMUSG00000089976	unprocessed_pseudogene	NA	NA	NA	NA
	XLOC_000571	1	85078164	85080183	+	lncRNA	NA	FALSE	none	101	0	NA	lncRNA	0	0	0	0	0	0	0	0	0	0	no	NA	NA	NA	NA	NA	Guttman_lincRNA_272	Overlap	NA	NA	NA	NA
	XLOC_000572	1	85100163	85100535	+	protein_coding	NA	FALSE	none	372	0	NA	lncRNA	0	0	0	0	0	0	0	0	0	0.965752	no	NA	NA	NA	NA	NA	ENSMUSG00000073631	protein_coding	NA	NA	NA	NA
	XLOC_000573	1	85115318	85117237	+	unprocessed_pseudogene	NA	FALSE	none	193	0	NA	lncRNA	0	0	0	0	0	0	0	0	0	0	no	NA	NA	NA	NA	NA	ENSMUSG00000090128	unprocessed_pseudogene	NA	NA	NA	NA
	XLOC_000574	1	85159518	85194260	+	transcribed_unprocessed_pseudogene	NA	FALSE	none	1719	502	0.476782	lncRNA	0.916462	1.16034	1.77598	1.03142	0	0	5.59255	2.97823	1.9041	2.89726	no	NA	NA	NA	NA	NA	ENSMUSG00000089716	transcribed_unprocessed_pseudogene	NA	NA	NA	NA
	XLOC_000575	1	85199696	85213537	+	transcribed_unprocessed_pseudogene	NA	FALSE	none	461	0	NA	lncRNA	0.916462	0	0	0	0	0	0	0	0	0	no	NA	NA	NA	NA	NA	ENSMUSG00000079457	transcribed_unprocessed_pseudogene	NA	NA	NA	NA
	XLOC_000576	1	85266697	85285491	+	transcribed_unprocessed_pseudogene	NA	FALSE	none	4005	1238	NA	protein_coding	1.83292	0	0	1.03142	3.12191	1.05768	22.3702	6.94921	18.089	8.69177	no	NA	NA	NA	NA	NA	ENSMUSG00000079455	transcribed_unprocessed_pseudogene	NA	NA	NA	NA
	XLOC_000577	1	85526601	85552178	+	transcribed_unprocessed_pseudogene	NA	FALSE	none	2958	1002	NA	protein_coding	1.83292	1.16034	0	0	0	0	2.79627	0	0.952052	0	no	NA	NA	NA	NA	NA	ENSMUSG00000090186	transcribed_unprocessed_pseudogene	NA	NA	NA	NA
	XLOC_000578	1	85575675	85577295	+	protein_coding	NA	FALSE	none	420	200	NA	lncRNA	0	0	0	0	0	0	0	0	0	0	no	NA	NA	NA	NA	NA	ENSMUSG00000094127	protein_coding	NA	NA	NA	NA
	XLOC_000579	1	85599285	85599839	+	lncRNA	NA	FALSE	none	427	16	NA	lncRNA	0	0	0	0	0	0	0	0	0	0	no	NA	NA	NA	NA	NA	Ensembl_ENSMUSG00000090103	Overlap	NA	NA	NA	NA
	XLOC_000580	1	85600377	85645037	+	nonsense_mediated_decay;protein_coding	NA	FALSE	none	2720	27	0.904423	protein_coding	0	0	1.77598	5.1571	8.3251	3.17304	2.79627	0	1.9041	0.965752	no	NA	NA	NA	NA	NA	ENSMUSG00000070031	nonsense_mediated_decay,protein_coding	NA	NA	NA	NA
	XLOC_000581	1	85649987	85709998	+	rRNA;nonsense_mediated_decay;protein_coding	NA	FALSE	none	6723	1746	NA	protein_coding	9.16462	8.12237	0	1.03142	3.12191	0	1.86418	0	0	0	no	NA	NA	NA	NA	NA	NA	NA	NA	NA	NA	NA
	XLOC_000582	1	85751947	85752074	+	miRNA	NA	FALSE	none	127	0	NA	lncRNA	0	0	0	0	0	0	0	0	0	0	no	NA	NA	NA	NA	NA	ENSMUSG00000098634	miRNA	NA	NA	NA	NA
	XLOC_000583	1	85763793	85763871	+	miRNA	NA	FALSE	none	78	78	NA	lncRNA	0	0	0	0	0	0	0	0	0	0	no	NA	NA	NA	NA	NA	ENSMUSG00000094834	miRNA	NA	NA	NA	NA
	XLOC_000584	1	85784712	85784962	+	lncRNA	NA	TRUE	none	250	231	NA	lncRNA	0	0	0	0	0	0	0	0	0	0	no	NA	NA	NA	NA	NA	Ensembl_ENSMUSG00000092932	lncRNA	NA	NA	NA	NA
	XLOC_000585	1	85793440	85851576	+	protein_coding	NA	FALSE	protein_coding	4146	305	0.416973	protein_coding	2127.11	1925	1625.02	1856.56	1328.89	1788.54	1661.92	1648.95	1829.84	2085.06	yes	mRNA	9	254	15	191	ENSMUSG00000036707	protein_coding	50.2787	0.0134956	159.574	-0.00381065
	XLOC_000586	1	85859984	85860652	+	NA	NA	TRUE	none	668	197	NA	lncRNA	0	0	0	0	4.16255	3.17304	2.79627	9.92745	0	0.965752	no	NA	NA	NA	NA	NA	NA	NA	NA	NA	NA	NA
	XLOC_000587	1	85894280	85908675	+	protein_coding	NA	FALSE	protein_coding	2230	88	1.65367	protein_coding	455.481	522.153	326.78	473.422	461.003	671.627	1310.52	1046.35	1347.15	1211.05	yes	mRNA	17	132	12	56	ENSMUSG00000026223	protein_coding.neuron.differentiation	NA	NA	39.9465	-0.185169
	XLOC_000588	1	85915087	85916139	+	lncRNA	NA	TRUE	none	145	0	NA	lncRNA	1.83292	0	0	1.03142	0	1.05768	0	1.98549	0.952052	2.89726	no	NA	NA	NA	NA	NA	Guttman_lincRNA_273	TooShort	NA	NA	NA	NA
	XLOC_000589	1	85917156	85917369	+	lncRNA	NA	TRUE	none	213	0	NA	lncRNA	0	0	0	0	0	0	1.86418	1.98549	0	0	no	NA	NA	NA	NA	NA	Necsulea_blastnPan.Locus_7377	lncRNA	NA	NA	NA	NA
	XLOC_000590	1	85928482	85940624	+	protein_coding	NA	FALSE	none	1217	490	NA	lncRNA	0	0	0	0	0	0	0	1.98549	0	0	no	NA	NA	NA	NA	NA	ENSMUSG00000026224	protein_coding	NA	NA	NA	NA
	XLOC_000591	1	85972710	85973363	+	lncRNA	NA	TRUE	none	579	173	NA	lncRNA	0	0	0	0	0	1.05768	0	0	0	0	no	NA	NA	NA	NA	NA	Necsulea_Locus_81261	lncRNA	NA	NA	NA	NA
	XLOC_000592	1	86021941	86029958	+	protein_coding	NA	FALSE	none	1655	573	NA	protein_coding	0	0	0	0	0	0	0	0	0	0	no	NA	NA	NA	NA	NA	ENSMUSG00000026226	protein_coding	NA	NA	NA	NA
	XLOC_000593	1	86045862	86056077	+	protein_coding	NA	FALSE	protein_coding	3952	367	NA	protein_coding	0.916462	1.16034	23.9757	24.7541	49.9506	24.3267	107.191	47.6518	56.1711	22.2123	no	mRNA	NA	NA	NA	NA	ENSMUSG00000026227	protein_coding	NA	NA	NA	NA
	XLOC_000594	1	86064195	86278284	+	nonsense_mediated_decay;protein_coding	snoRNA	FALSE	none	9323	1288	2.56048	protein_coding	5593.16	5054.44	6461.9	5618.14	3463.24	4692.93	3280.03	2974.26	2550.55	2960.03	no	NA	NA	NA	NA	NA	NA	NA	NA	NA	NA	NA
	XLOC_000595	1	86087300	86087422	+	snoRNA	nonsense_mediated_decay;protein_coding	FALSE	none	122	0	NA	lncRNA	3.66585	0	0.88799	5.1571	4.16255	1.05768	2.79627	0.992745	3.80821	3.86301	no	NA	NA	NA	NA	NA	ENSMUSG00000077274	snoRNA	NA	NA	NA	NA
	XLOC_000596	1	86303220	86310520	+	protein_coding	NA	FALSE	protein_coding	5911	406	0.245126	protein_coding	135.636	77.7427	911.077	749.842	559.863	392.4	322.504	212.447	121.863	90.7807	yes	mRNA	182	1280	68	299	ENSMUSG00000079445	protein_coding	26.8075	-0.418601	NA	NA
	XLOC_000597	1	86323266	86323593	+	protein_coding	NA	FALSE	none	327	0	NA	lncRNA	0	0	0	0	0	0	0	0	0	0	no	NA	NA	NA	NA	NA	ENSMUSG00000091806	protein_coding	NA	NA	NA	NA
	XLOC_000598	1	86359583	86373791	+	lncRNA	NA	FALSE	none	3417	1585	0.659587	lncRNA	7.33169	3.48102	10.6559	19.597	12.4877	16.9229	22.3702	16.8767	12.3767	16.4178	no	lncRNA	NA	NA	NA	NA	Ensembl_ENSMUSG00000073627|Guttman_lincRNA_274	Overlap	NA	NA	NA	NA
	XLOC_000599	1	86426328	86428049	+	protein_coding	NA	FALSE	none	1721	0	NA	protein_coding	0	1.16034	0	0	0	0	0	0	0	0	no	NA	NA	NA	NA	NA	ENSMUSG00000036574	protein_coding	NA	NA	NA	NA
	XLOC_000600	1	86434604	86436517	+	NA	NA	TRUE	lincRNA	1913	383	NA	protein_coding	1.83292	0	5.32794	5.1571	2.08128	2.11536	9.32091	10.9202	17.1369	14.4863	no	lncRNA	NA	NA	NA	NA	NA	NA	NA	NA	NA	NA
	XLOC_000601	1	86440331	86444403	+	lncRNA	NA	TRUE	lincRNA	2967	189	0.485281	lncRNA	6.41523	8.12237	15.0958	17.5341	14.5689	14.8075	27.0306	19.8549	22.8493	21.2466	yes	lncRNA	69	128	77	151	Necsulea_Locus_80218	lncRNA	NA	NA	NA	NA
	XLOC_000602	1	86445074	86445656	+	NA	NA	TRUE	none	582	101	NA	lncRNA	0	1.16034	0	1.03142	1.04064	3.17304	1.86418	0.992745	6.66437	1.9315	no	NA	NA	NA	NA	NA	NA	NA	NA	NA	NA	NA
	XLOC_000603	1	86487496	86491507	+	NA	NA	TRUE	lincRNA	4011	1453	0.200905	lncRNA	57.7371	45.2532	31.0796	59.8223	54.1132	41.2496	41.012	43.6808	108.534	81.1232	no	lncRNA	NA	NA	NA	NA	NA	NA	NA	NA	NA	NA
	XLOC_000604	1	86503510	86506772	+	NA	NA	TRUE	lincRNA	3262	379	0.585786	lncRNA	21.0786	9.28271	33.7436	47.4453	38.5036	44.4226	19.5739	29.7823	28.5616	47.3219	no	lncRNA	NA	NA	NA	NA	NA	NA	NA	NA	NA	NA
	XLOC_000605	1	86526735	86530698	+	protein_coding	NA	FALSE	protein_coding	1192	135	0.676768	protein_coding	51603.2	36499.6	48619.2	40467.8	19031.2	24205	14098.8	13441.8	12907	16184.1	yes	mRNA	29	498	315	1442	ENSMUSG00000026238	protein_coding	1064.3	-0.266701	603.106	-0.626153
	XLOC_000606	1	86541178	86542523	+	NA	NA	FALSE	none	1345	514	NA	lncRNA	0.916462	0	0	1.03142	2.08128	2.11536	3.72837	10.9202	2.85616	3.86301	no	NA	NA	NA	NA	NA	NA	NA	NA	NA	NA	NA
	XLOC_000607	1	86582903	86607104	+	nonsense_mediated_decay;protein_coding	NA	FALSE	none	3233	153	0.871512	protein_coding	329.01	254.114	298.364	313.552	190.437	240.094	232.091	281.94	253.246	268.479	no	NA	NA	NA	NA	NA	ENSMUSG00000026240	nonsense_mediated_decay,protein_coding	23.1108	-0.197351	47.2834	-0.0965114
	XLOC_000608	1	86643500	86644209	+	lncRNA	NA	TRUE	none	315	123	NA	lncRNA	0	0	0	0	0	0	0	0	0	0	no	NA	NA	NA	NA	NA	Necsulea_Locus_80344	lncRNA	NA	NA	NA	NA
	XLOC_000609	1	86703634	87050097	+	protein_coding	NA	FALSE	protein_coding	3418	80	1.0411	protein_coding	629.609	686.921	306.356	268.169	347.573	374.419	493.076	504.314	516.964	470.321	yes	mRNA	19	453	23	95	ENSMUSG00000053333	protein_coding.stem.cell.maintenance	13.2954	0.159392	24.1214	0.107787
	XLOC_000610	1	87125007	87127912	+	protein_coding	NA	FALSE	none	1680	45	NA	protein_coding	0	0	0	0	0	0	0	0	0	0	no	NA	NA	NA	NA	NA	ENSMUSG00000036500	protein_coding	NA	NA	NA	NA
	XLOC_000611	1	87172212	87173564	+	lncRNA	NA	TRUE	none	449	16	NA	lncRNA	0	0	0	0	0	0	0	0	0	0	no	NA	NA	NA	NA	NA	Necsulea_Locus_81005	lncRNA	NA	NA	NA	NA
	XLOC_000612	1	87183312	87188405	+	protein_coding	NA	FALSE	none	2180	38	NA	protein_coding	2.74938	2.32068	2.66397	0	3.12191	1.05768	0	0.992745	1.9041	0	no	NA	NA	NA	NA	NA	ENSMUSG00000036480	protein_coding	NA	NA	NA	NA
	XLOC_000613	1	87190651	87200069	+	protein_coding	NA	FALSE	protein_coding	2909	288	NA	protein_coding	10.9975	29.0085	0	2.06284	3.12191	2.11536	0	0	0	0	no	NA	NA	NA	NA	NA	ENSMUSG00000026251	protein_coding	NA	NA	NA	NA
	XLOC_000614	1	87205810	87211835	+	protein_coding	NA	FALSE	none	1921	19	NA	protein_coding	0	1.16034	1.77598	1.03142	3.12191	0	1.86418	0.992745	2.85616	0	no	mRNA	NA	NA	NA	NA	ENSMUSG00000026253	protein_coding	NA	NA	NA	NA
	XLOC_000615	1	87213913	87240488	+	protein_coding	NA	FALSE	protein_coding	7500	877	0.786656	protein_coding	3538.46	2324.16	2252.83	1693.59	840.836	1085.18	987.085	966.934	862.559	1058.46	yes	mRNA	22	290	38	336	ENSMUSG00000026254	protein_coding	262.206	-0.296354	160.307	-0.264472
	XLOC_000616	1	87247996	87248963	+	NA	NA	FALSE	none	967	209	NA	lncRNA	1.83292	0	0.88799	1.03142	4.16255	1.05768	8.38882	5.95647	2.85616	0.965752	no	NA	NA	NA	NA	NA	NA	NA	NA	NA	NA	NA
	XLOC_000617	1	87249037	87250939	+	NA	NA	FALSE	none	1902	718	NA	lncRNA	1.83292	2.32068	2.66397	2.06284	8.3251	3.17304	12.1172	14.8912	5.71231	4.82876	no	lncRNA	NA	NA	NA	NA	NA	NA	NA	NA	NA	NA
	XLOC_000618	1	87251147	87251248	+	snRNA	NA	FALSE	none	101	101	NA	lncRNA	0	2.32068	0.88799	1.03142	0	0	3.72837	0.992745	0	0	no	NA	NA	NA	NA	NA	ENSMUSG00000088318	snRNA	NA	NA	NA	NA
	XLOC_000619	1	87264362	87310839	+	protein_coding	NA	FALSE	protein_coding	1926	0	1.28151	protein_coding	24.7445	61.498	17.7598	4.12568	13.5283	10.5768	15.8456	2.97823	1.9041	3.86301	no	mRNA	NA	NA	NA	NA	ENSMUSG00000026255	protein_coding	NA	NA	NA	NA
	XLOC_000620	1	87327002	87450796	+	nonsense_mediated_decay;protein_coding	NA	FALSE	none	6476	388	1.983	protein_coding	1492	1864.67	1773.32	1361.47	1565.12	1390.85	1350.6	1216.11	1176.74	1120.27	no	NA	NA	NA	NA	NA	ENSMUSG00000048000	protein_coding.neuron.differentiation	67.4024	-0.27794	98.1098	-0.347052
	XLOC_000621	1	87470263	87475459	+	protein_coding	NA	FALSE	none	462	0	NA	protein_coding	0	0	0.88799	1.03142	1.04064	1.05768	0.932091	0	0	0	no	NA	NA	NA	NA	NA	ENSMUSG00000026258	protein_coding	NA	NA	NA	NA
	XLOC_000622	1	87509888	87597845	+	protein_coding	processed_pseudogene	FALSE	none	2590	77	NA	protein_coding	0	0	0	0	0	0	0	0	0	0	no	NA	NA	NA	NA	NA	ENSMUSG00000079434	protein_coding	NA	NA	NA	NA
	XLOC_000623	1	87514174	87514297	+	processed_pseudogene	protein_coding	FALSE	none	123	3	0.44694	lncRNA	0	0	0	0	0	0	0	0	0	0	no	NA	NA	NA	NA	NA	ENSMUSG00000091123	processed_pseudogene	NA	NA	NA	NA
	XLOC_000624	1	87620311	87720507	+	nonsense_mediated_decay;protein_coding	NA	FALSE	none	5128	28	NA	protein_coding	2762.22	3019.2	1231.64	908.681	313.232	263.363	86.6845	61.5502	23.8013	29.9383	no	NA	NA	NA	NA	NA	ENSMUSG00000026288	nonsense_mediated_decay,protein_coding	89.2372	0.0289545	NA	NA
	XLOC_000625	1	87755869	87792428	+	protein_coding	snoRNA	FALSE	none	3321	0	0.72917	protein_coding	868.806	698.524	839.15	770.471	586.92	596.532	456.725	508.285	493.163	494.465	no	NA	NA	NA	NA	NA	ENSMUSG00000026289	protein_coding	33.7008	-0.209351	44.6729	0.113866
	XLOC_000626	1	87776937	87777209	+	snoRNA	protein_coding	FALSE	none	272	0	0.0191881	lncRNA	298.766	135.76	184.702	143.367	111.348	109.999	123.036	168.767	242.773	232.746	no	NA	NA	NA	NA	NA	ENSMUSG00000087968	snoRNA	NA	NA	NA	NA
	XLOC_000627	1	87784555	87784820	+	snoRNA	protein_coding	FALSE	none	265	0	0.0199075	lncRNA	321.678	206.54	180.262	165.027	160.258	124.806	139.814	139.977	256.102	209.568	no	NA	NA	NA	NA	NA	ENSMUSG00000089281	snoRNA	NA	NA	NA	NA
	XLOC_000628	1	87792521	87797860	+	protein_coding	NA	FALSE	protein_coding	5339	2119	0.399584	lncRNA	17.4128	15.0844	11.5439	10.3142	47.8694	33.8458	42.8762	54.601	32.3698	30.9041	no	mRNA	NA	NA	NA	NA	ENSMUSG00000073623	protein_coding	NA	NA	NA	NA
	XLOC_000629	1	87803679	87845158	+	protein_coding	NA	FALSE	protein_coding	1729	0	NA	protein_coding	0	0	3.55196	1.03142	3.12191	2.11536	7.45673	9.92745	4.76026	8.69177	no	mRNA	NA	NA	NA	NA	ENSMUSG00000056055	protein_coding	NA	NA	NA	NA
	XLOC_000630	1	87853279	87945121	+	protein_coding	NA	FALSE	protein_coding	6333	5	0.309604	protein_coding	1238.14	1576.9	1378.16	1460.49	1627.56	1378.16	1624.64	1497.06	1523.28	1274.79	yes	mRNA	37	800	26	211	ENSMUSG00000070738	protein_coding	59.7715	0.150997	117.936	0.142549
	XLOC_000631	1	88015923	88016033	+	miRNA	NA	FALSE	none	110	110	NA	lncRNA	0	0	0	0	0	0	0	0	0	0	no	NA	NA	NA	NA	NA	ENSMUSG00000095942	miRNA	NA	NA	NA	NA
	XLOC_000632	1	88022380	88023962	+	processed_pseudogene	NA	FALSE	none	1582	0	2.42168	lncRNA	0	0	0	0	0	0	0	0	0	0	no	NA	NA	NA	NA	NA	ENSMUSG00000084021	processed_pseudogene	NA	NA	NA	NA
	XLOC_000633	1	88025210	88026059	+	unprocessed_pseudogene	NA	FALSE	none	849	0	NA	lncRNA	0	0	0	0	0	0	0	0	0	0	no	NA	NA	NA	NA	NA	ENSMUSG00000083478	unprocessed_pseudogene	NA	NA	NA	NA
	XLOC_000634	1	88055387	88220002	+	protein_coding;nonsense_mediated_decay	unprocessed_pseudogene	FALSE	none	10821	749	1.95641	protein_coding	0.916462	3.48102	0.88799	3.09426	10.4064	5.2884	54.0613	22.8331	17.1369	9.65752	no	NA	NA	NA	NA	NA	NA	NA	NA	NA	NA	NA
	XLOC_000635	1	88097917	88098131	+	unprocessed_pseudogene	protein_coding;nonsense_mediated_decay	FALSE	none	214	0	NA	lncRNA	0	0	0	0	0	0	0	0	0	0	no	NA	NA	NA	NA	NA	ENSMUSG00000082837	unprocessed_pseudogene	NA	NA	NA	NA
	XLOC_000636	1	88126775	88127609	+	unprocessed_pseudogene	protein_coding;nonsense_mediated_decay	FALSE	none	834	0	NA	lncRNA	0	0	0	0	0	0	0.932091	0	0.952052	0	no	NA	NA	NA	NA	NA	ENSMUSG00000084195	unprocessed_pseudogene	NA	NA	NA	NA
	XLOC_000637	1	88129580	88129833	+	unprocessed_pseudogene	protein_coding;nonsense_mediated_decay	FALSE	none	253	9	NA	lncRNA	0	0	0	0	0	0	0	0	0	0	no	NA	NA	NA	NA	NA	ENSMUSG00000081261	unprocessed_pseudogene	NA	NA	NA	NA
	XLOC_000638	1	88146375	88146769	+	unprocessed_pseudogene	protein_coding;nonsense_mediated_decay	FALSE	none	394	0	NA	lncRNA	0	0	0	0	0	0	1.86418	0.992745	0	0	no	NA	NA	NA	NA	NA	ENSMUSG00000081602	unprocessed_pseudogene	NA	NA	NA	NA
	XLOC_000639	1	88151037	88151881	+	unprocessed_pseudogene	protein_coding;nonsense_mediated_decay	FALSE	none	844	0	NA	protein_coding	0	0	0	0	0	0	0.932091	0	0	0	no	NA	NA	NA	NA	NA	ENSMUSG00000082513	unprocessed_pseudogene	NA	NA	NA	NA
	XLOC_000640	1	88153787	88154571	+	unprocessed_pseudogene	protein_coding;nonsense_mediated_decay	FALSE	none	784	6	NA	lncRNA	0	0	0	0	0	0	0	0	0	0	no	NA	NA	NA	NA	NA	ENSMUSG00000082677	unprocessed_pseudogene	NA	NA	NA	NA
	XLOC_000641	1	88186661	88187519	+	unprocessed_pseudogene	protein_coding;nonsense_mediated_decay	FALSE	none	858	0	NA	protein_coding	0	0	0	0	0	0	0	0	0	0	no	NA	NA	NA	NA	NA	ENSMUSG00000081488	unprocessed_pseudogene	NA	NA	NA	NA
	XLOC_000642	1	88191900	88192683	+	unprocessed_pseudogene	protein_coding;nonsense_mediated_decay	FALSE	none	783	29	NA	lncRNA	0	0	0	0	0	0	0	0	0	0.965752	no	NA	NA	NA	NA	NA	ENSMUSG00000083277	unprocessed_pseudogene	NA	NA	NA	NA
	XLOC_000643	1	88227019	88262289	+	protein_coding	NA	FALSE	none	7555	12	NA	protein_coding	0	1.16034	0	0	1.04064	1.05768	4.66046	2.97823	0.952052	0	no	NA	NA	NA	NA	NA	ENSMUSG00000079429	protein_coding	NA	NA	NA	NA
	XLOC_000644	1	88303282	88389293	+	protein_coding	NA	FALSE	none	4606	93	NA	protein_coding	0	0	0	0	0	0	0	0	0	0.965752	no	NA	NA	NA	NA	NA	ENSMUSG00000036251	protein_coding	NA	NA	NA	NA
	XLOC_000645	1	88406960	88426438	+	protein_coding	NA	FALSE	none	966	0	NA	protein_coding	0	0	0	0	0	1.05768	268.442	62.5429	78.0683	28.9726	no	NA	NA	NA	NA	NA	ENSMUSG00000026295	protein_coding	NA	NA	23.2628	0.899741
	XLOC_000646	1	88459610	88492516	+	lncRNA	NA	TRUE	lincRNA	4390	747	0.200905	lncRNA	80.6486	46.4136	15.9838	13.4085	3.12191	1.05768	1.86418	1.98549	0	1.9315	no	lncRNA	NA	NA	NA	NA	Necsulea_Locus_80975	lncRNA	NA	NA	NA	NA
	XLOC_000647	1	88658506	88658605	+	lncRNA	NA	TRUE	none	99	0	NA	lncRNA	0	0	0	0	0	0	0	0	0	0	no	NA	NA	NA	NA	NA	Necsulea_blastnMacaque.Locus_288818	TooShort	NA	NA	NA	NA
	XLOC_000648	1	88728448	88729831	+	lncRNA	NA	TRUE	none	1264	0	NA	lncRNA	0	0	0	0	0	0	0	0	0	0	no	NA	NA	NA	NA	NA	Necsulea_CUFF.131679	lncRNA	NA	NA	NA	NA
	XLOC_000649	1	88754889	88756100	+	lncRNA	NA	TRUE	none	936	517	NA	lncRNA	12.8305	8.12237	71.9272	27.8483	13.5283	5.2884	0	1.98549	0	2.89726	no	NA	NA	NA	NA	NA	Ensembl_ENSMUSG00000097398	lncRNA	12.4424	0.083616	NA	NA
	XLOC_000650	1	88761367	88771750	+	NA	NA	TRUE	none	1244	644	NA	lncRNA	9.16462	9.28271	10.6559	6.18852	0	2.11536	0	3.97098	0	3.86301	no	NA	NA	NA	NA	NA	NA	NA	NA	NA	NA	NA
	XLOC_000651	1	88803312	88804740	+	NA	NA	TRUE	lincRNA	1265	348	NA	lncRNA	15.5798	8.12237	1.77598	5.1571	0	0	0.932091	0	0	0	no	lncRNA	NA	NA	NA	NA	NA	NA	NA	NA	NA	NA
	XLOC_000652	1	89016070	89022292	+	lncRNA	NA	TRUE	none	754	302	NA	lncRNA	0	1.16034	0	0	0	0	0	0	0	0	no	NA	NA	NA	NA	NA	Necsulea_Locus_81849|Guttman_lincRNA_275|Necsulea_Locus_80956	lncRNA	NA	NA	NA	NA
	XLOC_000653	1	89025520	89027111	+	NA	NA	TRUE	lincRNA	1591	599	NA	lncRNA	10.0811	9.28271	0	0	0	0	0	0	0	0	no	NA	NA	NA	NA	NA	NA	NA	NA	NA	NA	NA
	XLOC_000654	1	89070321	89159326	+	protein_coding	NA	FALSE	protein_coding	9535	1249	0.881297	protein_coding	253.86	547.68	850.694	907.649	1466.26	1402.48	584.421	661.168	895.881	596.835	yes	mRNA	9	291	11	233	ENSMUSG00000036206	protein_coding	39.3135	-0.0608584	40.3957	0.169837
	XLOC_000655	1	89162670	89163367	+	NA	NA	TRUE	none	697	0	NA	lncRNA	0	0	0.88799	1.03142	0	3.17304	3.72837	5.95647	0.952052	2.89726	no	NA	NA	NA	NA	NA	NA	NA	NA	NA	NA	NA
	XLOC_000656	1	89387684	89391583	+	lncRNA	NA	TRUE	none	956	315	NA	lncRNA	0	0	0	0	0	0	0	0	0	0	no	NA	NA	NA	NA	NA	Necsulea_Locus_80742	lncRNA	NA	NA	NA	NA
	XLOC_000657	1	89454788	89895340	+	protein_coding	rRNA	FALSE	none	10119	436	0.208134	protein_coding	536.13	820.36	643.792	762.219	1236.28	1206.81	1357.13	1542.73	1475.68	1524.92	no	NA	NA	NA	NA	NA	ENSMUSG00000055013	protein_coding	52.8604	-0.207511	148.931	-0.334603
	XLOC_000658	1	89563359	89563474	+	rRNA	protein_coding	FALSE	none	115	113	NA	lncRNA	0	1.16034	0.88799	0	1.04064	1.05768	0.932091	0	0	0	no	NA	NA	NA	NA	NA	ENSMUSG00000088371	rRNA	NA	NA	NA	NA
	XLOC_000659	1	89899316	89900958	+	NA	NA	FALSE	none	1642	262	NA	lncRNA	0	0	0	0	4.16255	0	7.45673	2.97823	0.952052	3.86301	no	NA	NA	NA	NA	NA	NA	NA	NA	NA	NA	NA
	XLOC_000660	1	89902164	89902832	+	NA	NA	TRUE	none	668	0	NA	lncRNA	0.916462	0	0	0	3.12191	0	2.79627	9.92745	1.9041	1.9315	no	NA	NA	NA	NA	NA	NA	NA	NA	NA	NA	NA
	XLOC_000661	1	89903648	89906483	+	NA	NA	TRUE	lincRNA	2835	771	NA	lncRNA	0	1.16034	0	0	2.08128	3.17304	12.1172	22.8331	2.85616	8.69177	no	NA	NA	NA	NA	NA	NA	NA	NA	NA	NA	NA
	XLOC_000662	1	89930233	89931862	+	protein_coding	NA	FALSE	protein_coding	1372	42	NA	lncRNA	44.9066	51.0549	14.2078	11.3456	2.08128	1.05768	57.7897	30.7751	27.6095	26.0753	no	mRNA	NA	NA	NA	NA	ENSMUSG00000092627	protein_coding	NA	NA	NA	NA
	XLOC_000663	1	90203979	90216751	+	protein_coding	NA	FALSE	protein_coding	3348	251	2.34591	protein_coding	55.9042	35.9705	25.7517	29.9112	29.1379	47.5956	196.671	332.57	404.622	514.746	yes	mRNA	2	42	1	43	ENSMUSG00000044337	protein_coding	NA	NA	73.3575	0.0727634
	XLOC_000664	1	90327311	90327418	+	rRNA	NA	FALSE	none	107	89	NA	lncRNA	0	0	0	0	0	0	0	0	0	0	no	NA	NA	NA	NA	NA	NA	NA	NA	NA	NA	NA
	XLOC_000665	1	90355958	90396490	+	lncRNA	NA	TRUE	none	1471	219	NA	lncRNA	0	0	0	0	0	0	0	0.992745	0	0.965752	no	NA	NA	NA	NA	NA	Necsulea_CUFF.131827	lncRNA	NA	NA	NA	NA
	XLOC_000666	1	90445196	90451557	+	lncRNA	NA	TRUE	none	530	0	NA	lncRNA	0	0	0	0	0	0	0	0	0	0	no	NA	NA	NA	NA	NA	Necsulea_Locus_80749	lncRNA	NA	NA	NA	NA
	XLOC_000667	1	90603424	90613341	+	protein_coding	NA	FALSE	protein_coding	1843	79	1.01338	protein_coding	939.373	847.048	878.222	932.403	564.026	768.934	667.377	611.531	594.081	664.438	yes	mRNA	10	223	18	180	ENSMUSG00000034432	protein_coding	166.954	0.189552	149.475	-0.0170167
	XLOC_000668	1	90650278	90653242	+	lncRNA	NA	TRUE	none	474	0	NA	lncRNA	0	0	0	0	0	0	0	0	0	0	no	NA	NA	NA	NA	NA	Necsulea_Locus_80588	lncRNA	NA	NA	NA	NA
	XLOC_000669	1	90675160	90679793	+	protein_coding	NA	FALSE	none	1207	40	NA	lncRNA	0	0	0	0	0	0	0	0	0	0	no	NA	NA	NA	NA	NA	ENSMUSG00000056128	protein_coding	NA	NA	NA	NA
	XLOC_000670	1	90884981	90887439	+	lncRNA	NA	TRUE	none	393	135	NA	lncRNA	0	0	0	0	0	0	0	0	0	0	no	NA	NA	NA	NA	NA	Necsulea_CUFF.131903	lncRNA	NA	NA	NA	NA
	XLOC_000671	1	90915084	90951142	+	protein_coding	NA	FALSE	none	4803	272	NA	protein_coding	0.916462	0	6.21593	7.21994	11.447	4.23072	0.932091	0.992745	0	0.965752	no	mRNA	NA	NA	NA	NA	ENSMUSG00000026303	protein_coding	NA	NA	NA	NA
	XLOC_000672	1	90953107	90954012	+	protein_coding	NA	FALSE	none	261	0	NA	lncRNA	0	0	0	0	0	0	0	0	0	0	no	NA	NA	NA	NA	NA	ENSMUSG00000090550	protein_coding	NA	NA	NA	NA
	XLOC_000673	1	90998621	91128944	+	protein_coding	NA	FALSE	protein_coding	7935	253	2.43098	protein_coding	110.892	192.616	608.273	935.498	854.364	879.991	478.163	486.445	416.999	337.048	yes	mRNA	12	269	10	91	ENSMUSG00000026305	protein_coding	53.5848	0.146746	114.539	0.0402655
	XLOC_000674	1	91145085	91170795	+	protein_coding	NA	FALSE	protein_coding	3868	0	NA	protein_coding	35.742	133.439	127.87	27.8483	97.82	17.9806	32.6232	6.94921	13.3287	5.79451	no	mRNA	NA	NA	NA	NA	ENSMUSG00000070732	protein_coding	11.2582	0.524856	17.0341	0.579865
	XLOC_000675	1	91179821	91225196	+	protein_coding	NA	FALSE	none	3022	316	NA	lncRNA	0	0	0	2.06284	0	0	2.79627	2.97823	0.952052	0	no	NA	NA	NA	NA	NA	ENSMUSG00000034353	protein_coding	NA	NA	NA	NA
	XLOC_000676	1	91250310	91295336	+	protein_coding	NA	FALSE	protein_coding	11083	2233	0.340241	protein_coding	355.587	309.811	409.363	448.668	367.345	378.65	341.145	368.308	359.876	363.123	yes	mRNA	11	446	12	80	ENSMUSG00000034343	protein_coding	42.9465	-0.311297	54.8564	-0.296255
	XLOC_000677	1	91296044	91296936	+	processed_pseudogene	NA	FALSE	none	892	53	1.27724	protein_coding	2.74938	2.32068	6.21593	1.03142	0	5.2884	9.32091	12.9057	0.952052	2.89726	no	NA	NA	NA	NA	NA	ENSMUSG00000083064	processed_pseudogene	NA	NA	NA	NA
	XLOC_000678	1	91298330	91321248	+	nonsense_mediated_decay;protein_coding	NA	FALSE	none	2661	34	1.0106	protein_coding	126.472	126.477	97.6789	123.77	176.908	249.613	168.709	109.202	114.246	97.541	no	NA	NA	NA	NA	NA	ENSMUSG00000026307	nonsense_mediated_decay,protein_coding	NA	NA	NA	NA
	XLOC_000679	1	91322074	91348306	+	protein_coding	NA	FALSE	none	5445	371	0.312158	protein_coding	0	2.32068	3.55196	5.1571	2.08128	5.2884	6.52464	5.95647	6.66437	4.82876	no	mRNA	NA	NA	NA	NA	ENSMUSG00000049515	protein_coding	NA	NA	NA	NA
	XLOC_000680	1	91351015	91362416	+	protein_coding	NA	FALSE	protein_coding	3089	199	1.57005	protein_coding	4.58231	16.2447	1.77598	3.09426	0	0	4.66046	0	0	0.965752	no	mRNA	NA	NA	NA	NA	ENSMUSG00000026308	protein_coding	NA	NA	NA	NA
	XLOC_000681	1	91366429	91374216	+	protein_coding	NA	FALSE	protein_coding	3081	84	NA	protein_coding	48.5725	77.7427	49.7274	92.8278	97.82	97.3066	51.265	48.6445	45.6985	40.5616	yes	mRNA	9	168	6	57	ENSMUSG00000047443	protein_coding	NA	NA	21.8404	0.386192
	XLOC_000682	1	91494667	91529303	+	protein_coding	NA	FALSE	protein_coding	5974	414	1.69394	protein_coding	216.285	167.089	229.989	231.038	296.582	318.362	164.98	244.215	164.705	203.774	yes	mRNA	20	330	7	106	ENSMUSG00000034292	protein_coding	19.4905	0.0992132	36.022	0.00150454
	XLOC_000683	1	91540430	91559738	+	protein_coding	NA	FALSE	protein_coding	6471	239	0.25967	protein_coding	378.499	307.49	387.163	370.28	303.866	278.17	208.788	171.745	232.301	215.363	yes	mRNA	9	346	2	91	ENSMUSG00000026311	protein_coding	NA	NA	22.5161	0.401123
	XLOC_000684	1	91567602	91568574	+	lncRNA	NA	TRUE	none	435	309	NA	lncRNA	0	0	0	0	0	1.05768	0	0	0	1.9315	no	NA	NA	NA	NA	NA	Necsulea_CUFF.132028	lncRNA	NA	NA	NA	NA
	XLOC_000685	1	91801460	91848028	+	protein_coding	NA	FALSE	protein_coding	1329	0	0.541004	protein_coding	0	0	3.55196	3.09426	6.24383	3.17304	11.1851	16.8767	11.4246	27.0411	no	mRNA	NA	NA	NA	NA	ENSMUSG00000007805	protein_coding	NA	NA	NA	NA
	XLOC_000686	1	91864897	91866769	+	lncRNA	NA	TRUE	none	512	348	0.525949	lncRNA	0	0	0	0	0	0	0	0	0.952052	0	no	NA	NA	NA	NA	NA	Necsulea_CUFF.132073	lncRNA	NA	NA	NA	NA
	XLOC_000687	1	92180528	92189886	+	lncRNA	NA	TRUE	none	727	171	NA	lncRNA	2.74938	1.16034	0.88799	1.03142	2.08128	5.2884	0.932091	1.98549	5.71231	3.86301	no	NA	NA	NA	NA	NA	Necsulea_Locus_80374	lncRNA	NA	NA	NA	NA
	XLOC_000688	1	92379745	92393631	+	lncRNA	NA	TRUE	none	946	249	NA	lncRNA	0	0	0	0	0	0	0	0	0	0	no	NA	NA	NA	NA	NA	Necsulea_Locus_80394	lncRNA	NA	NA	NA	NA
	XLOC_000689	1	92573124	92574206	+	protein_coding	NA	FALSE	none	1082	0	NA	protein_coding	0	0	0	0	0	0	0	0	0	0	no	NA	NA	NA	NA	NA	ENSMUSG00000058904	protein_coding	NA	NA	NA	NA
	XLOC_000690	1	92588331	92589297	+	protein_coding	NA	FALSE	none	966	31	NA	protein_coding	0	0	0	0	0	0	0	0	0	0	no	NA	NA	NA	NA	NA	ENSMUSG00000046300	protein_coding	NA	NA	NA	NA
	XLOC_000691	1	92596520	92597492	+	protein_coding	NA	FALSE	none	972	0	NA	protein_coding	0	0	0	0	0	0	0	0	0	0	no	NA	NA	NA	NA	NA	ENSMUSG00000062497	protein_coding	NA	NA	NA	NA
	XLOC_000692	1	92607838	92608847	+	protein_coding	NA	FALSE	none	969	0	NA	protein_coding	0	1.16034	0	0	1.04064	0	0	0	0	0	no	NA	NA	NA	NA	NA	ENSMUSG00000063583	protein_coding	NA	NA	NA	NA
	XLOC_000693	1	92619880	92621001	+	protein_coding	NA	FALSE	none	1121	0	NA	protein_coding	0	0	0	0	0	0	0	0	0	0	no	NA	NA	NA	NA	NA	ENSMUSG00000061616	protein_coding	NA	NA	NA	NA
	XLOC_000694	1	92716967	92719441	+	lncRNA	NA	TRUE	none	1936	448	NA	lncRNA	0	0	0	0	0	0	0	0	0	0	no	NA	NA	NA	NA	NA	Necsulea_CUFF.132162|Necsulea_CUFF.132165	lncRNA	NA	NA	NA	NA
	XLOC_000695	1	92759596	92761465	+	lncRNA	NA	TRUE	none	1062	2	NA	lncRNA	0	0	0	0	0	0	0	0	0	0	no	NA	NA	NA	NA	NA	Necsulea_Locus_82169|Necsulea_Locus_80383|Necsulea_Locus_80791	lncRNA	NA	NA	NA	NA
	XLOC_000696	1	92761719	92766438	+	lncRNA	NA	TRUE	none	1654	3	NA	lncRNA	0	0	0	0	0	0	0.932091	0	0	0	no	NA	NA	NA	NA	NA	Necsulea_Locus_82169|Necsulea_Locus_80383|Necsulea_Locus_80791	lncRNA	NA	NA	NA	NA
	XLOC_000697	1	92831644	92860198	+	protein_coding	miRNA	FALSE	none	3595	45	0.953111	protein_coding	96.2285	268.038	393.379	666.297	780.479	962.49	1106.39	1205.19	1043.45	1048.81	no	NA	NA	NA	NA	NA	ENSMUSG00000034220	protein_coding	20.6218	-0.282403	100.781	-0.379131
	XLOC_000698	1	92850377	92850443	+	miRNA	protein_coding	FALSE	none	66	24	NA	lncRNA	0	0	0	0	1.04064	2.11536	0	1.98549	0.952052	0	no	NA	NA	NA	NA	NA	ENSMUSG00000065470	miRNA	NA	NA	NA	NA
	XLOC_000699	1	92906988	92908620	+	protein_coding	NA	FALSE	protein_coding	1491	0	0.339611	lncRNA	43.0737	23.2068	23.0877	23.7227	12.4877	23.269	30.759	27.7969	34.2739	36.6986	no	mRNA	NA	NA	NA	NA	ENSMUSG00000047067	protein_coding	NA	NA	NA	NA
	XLOC_000700	1	92910782	92924384	+	nonsense_mediated_decay;protein_coding	NA	FALSE	none	6143	962	0.173771	protein_coding	164.047	293.566	95.9029	203.19	320.517	451.63	477.231	451.699	354.163	308.075	no	NA	NA	NA	NA	NA	ENSMUSG00000026269	nonsense_mediated_decay,protein_coding	NA	NA	42.2678	-0.0413284
	XLOC_000701	1	92934375	92948600	+	nonsense_mediated_decay;protein_coding	NA	FALSE	none	4156	0	0.38043	protein_coding	260.275	256.435	351.644	247.541	163.38	227.401	290.813	256.128	242.773	286.828	no	NA	NA	NA	NA	NA	ENSMUSG00000026270	nonsense_mediated_decay,protein_coding	NA	NA	14.8446	-0.0186393
	XLOC_000702	1	92951583	92952436	+	NA	NA	FALSE	none	853	0	NA	lncRNA	0	0	0	0	0	2.11536	2.79627	6.94921	6.66437	0.965752	no	NA	NA	NA	NA	NA	NA	NA	NA	NA	NA	NA
	XLOC_000703	1	92973118	92986391	+	protein_coding	NA	FALSE	none	4498	791	0.135796	protein_coding	0	0	0.88799	0	2.08128	1.05768	0.932091	6.94921	0	1.9315	no	NA	NA	NA	NA	NA	ENSMUSG00000026271	protein_coding	NA	NA	NA	NA
	XLOC_000704	1	92997130	92997935	+	lncRNA	NA	TRUE	none	474	0	NA	lncRNA	0	0	0	0	0	0	0	0	0	0	no	NA	NA	NA	NA	NA	Necsulea_CUFF.132219	lncRNA	NA	NA	NA	NA
	XLOC_000705	1	93006333	93012269	+	protein_coding	NA	FALSE	none	1088	0	NA	protein_coding	0	0	0	0	0	0	0	0	0	0	no	NA	NA	NA	NA	NA	ENSMUSG00000045091	protein_coding	NA	NA	NA	NA
	XLOC_000706	1	93115325	93115913	+	lncRNA	NA	TRUE	none	247	0	NA	lncRNA	0	0	0	0	1.04064	0	0	0	0.952052	0	no	NA	NA	NA	NA	NA	Necsulea_Locus_80963	lncRNA	NA	NA	NA	NA
	XLOC_000707	1	93135244	93145407	+	protein_coding	NA	FALSE	none	1534	0	NA	protein_coding	0	0	0	1.03142	1.04064	0	0	0	0	0	no	NA	NA	NA	NA	NA	ENSMUSG00000026272	protein_coding	NA	NA	NA	NA
	XLOC_000708	1	93215375	93231072	+	protein_coding	NA	FALSE	none	3493	0	NA	protein_coding	0	0	2.66397	0	1.04064	0	3.72837	0	3.80821	9.65752	no	NA	NA	NA	NA	NA	ENSMUSG00000084989	protein_coding	NA	NA	NA	NA
	XLOC_000709	1	93235840	93301065	+	miRNA;protein_coding	NA	FALSE	none	9203	328	0.977434	protein_coding	1.83292	8.12237	12.4319	24.7541	34.3411	9.51913	18.6418	48.6445	87.5888	309.041	no	NA	NA	NA	NA	NA	NA	NA	NA	NA	NA	NA
	XLOC_000710	1	93342853	93373489	+	nonsense_mediated_decay;protein_coding	miRNA;snRNA	FALSE	none	10560	2201	2.56669	protein_coding	737.752	602.216	930.613	980.88	807.535	945.567	775.5	923.253	671.197	743.629	no	NA	NA	NA	NA	NA	ENSMUSG00000026275	nonsense_mediated_decay,protein_coding	112.104	-0.243287	159.172	-0.337128
	XLOC_000711	1	93352157	93352285	+	miRNA	nonsense_mediated_decay;protein_coding	FALSE	none	128	0	NA	lncRNA	1.83292	1.16034	0.88799	1.03142	1.04064	3.17304	1.86418	2.97823	2.85616	0.965752	no	NA	NA	NA	NA	NA	ENSMUSG00000098689	miRNA	NA	NA	NA	NA
	XLOC_000712	1	93363254	93363357	+	snRNA	nonsense_mediated_decay;protein_coding	FALSE	none	103	103	NA	lncRNA	0	0	0	0	0	0	0	0	0.952052	0.965752	no	NA	NA	NA	NA	NA	ENSMUSG00000064389	snRNA	NA	NA	NA	NA
	XLOC_000713	1	93373895	93403502	+	protein_coding	NA	FALSE	none	3217	0	NA	protein_coding	0.916462	4.64136	1.77598	0	2.08128	1.05768	0.932091	2.97823	0	0.965752	no	NA	NA	NA	NA	NA	ENSMUSG00000034107	protein_coding	NA	NA	NA	NA
	XLOC_000714	1	93421681	93422488	+	protein_coding	NA	FALSE	none	807	0	1.27012	protein_coding	0	1.16034	0	0	0	0	0	0	0	0	no	NA	NA	NA	NA	NA	ENSMUSG00000090489	protein_coding	NA	NA	NA	NA
	XLOC_000715	1	93478963	93510260	+	protein_coding	NA	FALSE	protein_coding	4386	254	1.27942	protein_coding	7242.8	5968.78	4239.26	4134.96	2412.2	2349.11	3563.39	2699.27	3404.54	3151.25	yes	mRNA	71	360	61	322	ENSMUSG00000026276	protein_coding	4026.86	-0.272733	6656.32	-0.30678
	XLOC_000716	1	93512078	93621976	+	protein_coding	NA	FALSE	protein_coding	9536	496	1.56862	protein_coding	21.9951	42.9325	36.4076	38.1625	59.3164	67.6916	165.912	208.476	134.239	182.527	yes	mRNA	2	47	0	41	ENSMUSG00000034066	protein_coding	NA	NA	NA	NA
	XLOC_000717	1	93647229	93648876	+	lncRNA	NA	TRUE	none	776	674	NA	lncRNA	0	0	0	0	0	0	0	0	0	0	no	NA	NA	NA	NA	NA	Necsulea_Locus_80723	lncRNA	NA	NA	NA	NA
	XLOC_000718	1	93685505	93695989	+	protein_coding	NA	FALSE	protein_coding	1897	53	0.0993234	protein_coding	41.2408	34.8102	190.918	222.787	124.877	112.114	87.6166	74.4559	44.7465	62.7739	yes	mRNA	2	59	22	71	ENSMUSG00000026278	protein_coding	12.6567	-0.0486483	11.3758	0.116102
	XLOC_000719	1	93751499	93789434	+	protein_coding	NA	FALSE	protein_coding	3120	82	1.50075	protein_coding	1073.18	862.132	547.002	553.872	405.849	540.475	604.927	561.894	653.108	641.26	yes	mRNA	21	248	6	80	ENSMUSG00000026280	protein_coding	55.2268	0.00975594	63.4158	-0.372769
	XLOC_000720	1	93803964	93822101	+	protein_coding	NA	FALSE	protein_coding	4539	615	0.557881	protein_coding	1296.79	924.79	1184.58	1088.15	759.666	775.28	655.26	580.756	529.341	494.465	yes	mRNA	20	598	33	371	ENSMUSG00000026283	protein_coding	286.288	-0.0398696	207.728	0.0398001
	XLOC_000721	1	93825239	93854287	+	protein_coding	NA	FALSE	protein_coding	5506	843	0.697927	protein_coding	177.794	198.418	198.91	218.661	254.956	259.132	241.412	176.709	208.499	161.281	yes	mRNA	10	57	91	237	ENSMUSG00000073609	protein_coding	NA	NA	10.8008	0.0160496
	XLOC_000722	1	93861343	93876494	+	protein_coding	NA	FALSE	none	2846	415	NA	protein_coding	0	0	0.88799	1.03142	0	1.05768	2.79627	0.992745	0.952052	2.89726	no	NA	NA	NA	NA	NA	ENSMUSG00000094651	protein_coding	NA	NA	NA	NA
	XLOC_000723	1	93918436	93941239	+	protein_coding	NA	FALSE	none	1211	0	NA	protein_coding	0.916462	1.16034	1.77598	0	3.12191	0	2.79627	2.97823	2.85616	0.965752	no	NA	NA	NA	NA	NA	ENSMUSG00000093805	protein_coding	NA	NA	NA	NA
	XLOC_000724	1	93990508	94011541	+	protein_coding	NA	FALSE	none	4061	815	NA	protein_coding	1.83292	1.16034	2.66397	3.09426	1.04064	3.17304	1.86418	1.98549	2.85616	2.89726	no	mRNA	NA	NA	NA	NA	ENSMUSG00000073608	protein_coding	NA	NA	NA	NA
	XLOC_000725	1	94020492	94028326	+	protein_coding	NA	FALSE	none	4503	601	NA	protein_coding	0	0	0	0	0	0	0	0	0	0	no	NA	NA	NA	NA	NA	ENSMUSG00000034000	protein_coding	NA	NA	NA	NA
	XLOC_000726	1	94177239	94177708	+	lncRNA	NA	TRUE	none	280	280	0.287468	lncRNA	0	0	1.77598	0	2.08128	0	0	0	0	0	no	NA	NA	NA	NA	NA	Necsulea_Locus_80704	lncRNA	NA	NA	NA	NA
	XLOC_000727	1	94226977	94227939	+	NA	NA	TRUE	none	962	479	NA	lncRNA	0	8.12237	7.10392	5.1571	11.447	1.05768	1.86418	0	1.9041	0	no	NA	NA	NA	NA	NA	NA	NA	NA	NA	NA	NA
	XLOC_000728	1	95313627	95335284	+	protein_coding	NA	FALSE	protein_coding	2107	49	0.238465	protein_coding	125.555	109.072	51.5034	55.6967	80.1291	107.883	125.832	90.3398	115.198	132.308	yes	mRNA	2	5	18	50	ENSMUSG00000051185	protein_coding	NA	NA	15.0059	-0.00729923
	XLOC_000729	1	95498583	95499187	+	processed_pseudogene	NA	FALSE	none	604	23	0.96036	protein_coding	10.0811	9.28271	7.10392	11.3456	3.12191	4.23072	6.52464	2.97823	7.61642	3.86301	no	NA	NA	NA	NA	NA	ENSMUSG00000081051	processed_pseudogene	NA	NA	NA	NA
	XLOC_000730	1	96303145	96303255	+	miRNA	NA	FALSE	none	110	110	NA	lncRNA	0	0	0	0	0	0	0	0	0	0	no	NA	NA	NA	NA	NA	ENSMUSG00000096585	miRNA	NA	NA	NA	NA
	XLOC_000731	1	96336904	96371580	+	lncRNA	NA	TRUE	none	528	518	NA	lncRNA	0	0	0	0	0	0	0	0	0	0	no	NA	NA	NA	NA	NA	Necsulea_Locus_80541	lncRNA	NA	NA	NA	NA
	XLOC_000732	1	96387636	96388716	+	lncRNA	NA	TRUE	none	376	0	NA	lncRNA	0	0	0	0	0	0	0	0	0	0	no	NA	NA	NA	NA	NA	Necsulea_Locus_81020	lncRNA	NA	NA	NA	NA
	XLOC_000733	1	96399270	96399961	+	lncRNA	NA	TRUE	none	283	0	NA	lncRNA	0	0	0	0	0	0	0	0	0	0	no	NA	NA	NA	NA	NA	Necsulea_Locus_80175	lncRNA	NA	NA	NA	NA
	XLOC_000734	1	96425942	96426783	+	lncRNA	NA	TRUE	none	248	118	NA	lncRNA	0	0	0	0	0	0	0	0	0	0	no	NA	NA	NA	NA	NA	Necsulea_Locus_80942	lncRNA	NA	NA	NA	NA
	XLOC_000735	1	96617098	96617205	+	snRNA	NA	FALSE	none	107	107	0.0298268	lncRNA	0	0	0	0	0	0	0	0	0	0	no	NA	NA	NA	NA	NA	ENSMUSG00000095610	snRNA	NA	NA	NA	NA
	XLOC_000736	1	96762030	96762158	+	snoRNA	NA	FALSE	none	128	0	NA	lncRNA	0	0	0	0	0	0	0	0	0	0	no	NA	NA	NA	NA	NA	ENSMUSG00000077255	snoRNA	NA	NA	NA	NA
	XLOC_000737	1	96872220	96881249	+	lncRNA	NA	FALSE	none	3864	1798	NA	lncRNA	53.1548	51.0549	11.5439	15.4713	7.28447	4.23072	12.1172	7.94196	2.85616	2.89726	yes	lncRNA	0	37	7	48	Ensembl_ENSMUSG00000097814|Necsulea_ENSMUSG00000092052|Guttman_lincRNA_278	Overlap	NA	NA	NA	NA
	XLOC_000738	1	97024680	97025928	+	protein_coding	NA	FALSE	none	1248	0	1.78657	protein_coding	0	1.16034	1.77598	2.06284	1.04064	0	0	0.992745	0	0	no	mRNA	NA	NA	NA	NA	ENSMUSG00000044757	protein_coding	29.345	-0.944125	NA	NA
	XLOC_000739	1	97289811	97290648	+	lncRNA	NA	TRUE	none	223	11	NA	lncRNA	0	0	0	0	0	0	0	0	0	0	no	NA	NA	NA	NA	NA	Necsulea_CUFF.132597	lncRNA	NA	NA	NA	NA
	XLOC_000740	1	97590067	97595735	+	lncRNA	NA	TRUE	none	390	152	NA	lncRNA	0	0	0	0	0	0	0	0	0	0	no	NA	NA	NA	NA	NA	Necsulea_Locus_81230	lncRNA	NA	NA	NA	NA
	XLOC_000741	1	97770171	97793709	+	nonsense_mediated_decay;protein_coding	NA	FALSE	none	3406	493	1.52519	protein_coding	84.3145	70.7807	89.6869	68.0737	48.91	61.3455	52.1971	51.6227	50.4588	79.1917	no	NA	NA	NA	NA	NA	ENSMUSG00000026333	nonsense_mediated_decay,protein_coding	26.9216	0.121896	11.4014	-0.247828
	XLOC_000742	1	98049821	98049928	+	snRNA	NA	FALSE	none	107	107	0.373221	lncRNA	0	0	0	0	0	0	0	0	0	0	no	NA	NA	NA	NA	NA	ENSMUSG00000096085	snRNA	NA	NA	NA	NA
	XLOC_000743	1	98119405	98133668	+	lncRNA	NA	TRUE	none	384	233	NA	lncRNA	0	0	0	0	0	0	0	0	0	0	no	NA	NA	NA	NA	NA	Necsulea_Locus_81252	lncRNA	NA	NA	NA	NA
	XLOC_000744	1	98143244	98146135	+	lncRNA	NA	TRUE	none	410	185	NA	lncRNA	0	0	0	0	0	0	0	0	0	0	no	NA	NA	NA	NA	NA	Necsulea_CUFF.132681	lncRNA	NA	NA	NA	NA
	XLOC_000745	1	98263522	98264506	+	processed_pseudogene	NA	FALSE	none	984	0	NA	lncRNA	0	0	0	0	0	0	0	0	0	0	no	NA	NA	NA	NA	NA	ENSMUSG00000097608	processed_pseudogene	NA	NA	NA	NA
	XLOC_000746	1	98421123	98516988	+	nonsense_mediated_decay;protein_coding	processed_pseudogene	FALSE	none	3167	220	NA	protein_coding	0	0	0	0	0	0	0	0	0	0	no	NA	NA	NA	NA	NA	ENSMUSG00000026336	nonsense_mediated_decay,protein_coding	NA	NA	NA	NA
	XLOC_000747	1	98457767	98459162	+	processed_pseudogene	nonsense_mediated_decay;protein_coding	FALSE	none	1395	0	2.55935	protein_coding	0	3.48102	0.88799	1.03142	0	1.05768	0.932091	1.98549	0.952052	0	no	NA	NA	NA	NA	NA	ENSMUSG00000089791	processed_pseudogene	NA	NA	NA	NA
	XLOC_000748	1	98549450	98549560	+	miRNA	NA	FALSE	none	110	110	NA	lncRNA	0	0	0	0	0	0	0	0	0	0	no	NA	NA	NA	NA	NA	ENSMUSG00000096193	miRNA	NA	NA	NA	NA
	XLOC_000749	1	98589526	98597277	+	lncRNA	NA	TRUE	none	161	158	NA	lncRNA	0	0	0	0	0	0	0	0	0	0.965752	no	NA	NA	NA	NA	NA	Guttman_lincRNA_280	lncRNA	NA	NA	NA	NA
	XLOC_000750	1	98605810	98607306	+	lncRNA	NA	TRUE	none	534	127	0.655405	lncRNA	0	0	0	0	1.04064	0	0	0	0	0	no	NA	NA	NA	NA	NA	Necsulea_Locus_81225	lncRNA	NA	NA	NA	NA
	XLOC_000751	1	99017363	99017463	+	snRNA	NA	FALSE	none	100	95	NA	lncRNA	0	0	0	0	0	0	0	0	0	0	no	NA	NA	NA	NA	NA	ENSMUSG00000087804	snRNA	NA	NA	NA	NA
	XLOC_000752	1	99183170	99190365	+	lncRNA	NA	TRUE	none	785	0	0.140869	lncRNA	7.33169	5.8017	14.2078	13.4085	10.4064	6.34609	4.66046	1.98549	0.952052	4.82876	no	NA	NA	NA	NA	NA	Guttman_lincRNA_281	lncRNA	NA	NA	NA	NA
	XLOC_000753	1	99772764	100485942	+	protein_coding	NA	FALSE	none	5120	45	NA	protein_coding	0	0	0	0	0	0	0.932091	0	0	0	no	NA	NA	NA	NA	NA	ENSMUSG00000067028	protein_coding	NA	NA	NA	NA
	XLOC_000754	1	100861792	100861901	+	miRNA	NA	FALSE	none	109	109	NA	lncRNA	0	0	0	0	0	0	0	0	0	0	no	NA	NA	NA	NA	NA	ENSMUSG00000077039	miRNA	NA	NA	NA	NA
	XLOC_000755	1	101155757	101175148	+	lncRNA	NA	TRUE	none	697	342	NA	lncRNA	0	0	0	0	0	0	0	0	0	0	no	NA	NA	NA	NA	NA	Necsulea_Locus_80847	lncRNA	NA	NA	NA	NA
	XLOC_000756	1	101262777	101280326	+	lncRNA	NA	TRUE	none	1128	354	NA	lncRNA	0	0	0	0	0	0	0	0	0	0	no	NA	NA	NA	NA	NA	Necsulea_Locus_80599	lncRNA	NA	NA	NA	NA
	XLOC_000757	1	102115777	102119696	+	lncRNA	NA	TRUE	none	792	66	NA	lncRNA	0	0	0	0	0	0	0	0	0	0	no	NA	NA	NA	NA	NA	Necsulea_Locus_80242	lncRNA	NA	NA	NA	NA
	XLOC_000758	1	103725480	103726992	+	lncRNA	NA	TRUE	none	276	0	NA	lncRNA	0	0	0	0	0	0	0	0	0	0	no	NA	NA	NA	NA	NA	Necsulea_Locus_80212	lncRNA	NA	NA	NA	NA
	XLOC_000759	1	104485956	104486286	+	lncRNA	NA	TRUE	none	330	264	NA	lncRNA	0	0	0	0	0	0	0	0	0	0	no	NA	NA	NA	NA	NA	Ensembl_ENSMUSG00000088161	lncRNA	NA	NA	NA	NA
	XLOC_000760	1	104744669	104744759	+	miRNA	NA	FALSE	none	90	90	NA	lncRNA	0	0	0	0	0	0	0	0	0	0	no	NA	NA	NA	NA	NA	ENSMUSG00000080661	miRNA	NA	NA	NA	NA
	XLOC_000761	1	104768528	104995481	+	protein_coding	NA	FALSE	none	4012	66	NA	protein_coding	1.83292	0	1.77598	4.12568	7.28447	4.23072	12.1172	5.95647	5.71231	13.5205	no	mRNA	NA	NA	NA	NA	ENSMUSG00000050840	protein_coding	NA	NA	NA	NA
	XLOC_000762	1	105420982	105434078	+	lncRNA	NA	TRUE	none	630	215	NA	lncRNA	0	0	0	0	0	0	0	0	0	0	no	NA	NA	NA	NA	NA	Necsulea_CUFF.132933|Necsulea_Locus_81229	lncRNA	NA	NA	NA	NA
	XLOC_000763	1	105455970	105458829	+	pseudogene	NA	FALSE	none	2859	652	0.522875	protein_coding	421.572	362.026	414.691	347.588	195.64	266.536	246.072	191.6	225.636	253.027	no	NA	NA	NA	NA	NA	ENSMUSG00000067017	pseudogene	NA	NA	NA	NA
	XLOC_000764	1	105574686	105574782	+	miRNA	NA	FALSE	none	96	0	3.66775	lncRNA	0	0	0	0	0	0	0	0	0	0	no	NA	NA	NA	NA	NA	ENSMUSG00000076999	miRNA	NA	NA	NA	NA
	XLOC_000765	1	105663860	105755161	+	protein_coding	NA	FALSE	protein_coding	5519	61	1.2248	protein_coding	633.275	748.419	757.455	729.214	629.586	544.706	520.107	618.48	546.478	648.986	yes	mRNA	23	414	21	431	ENSMUSG00000026319	protein_coding	51.3493	0.0555244	90.4403	0.30885
	XLOC_000766	1	105760354	105760915	+	NA	NA	TRUE	none	561	187	NA	lncRNA	0.916462	1.16034	0	0	3.12191	1.05768	2.79627	10.9202	2.85616	2.89726	no	NA	NA	NA	NA	NA	NA	NA	NA	NA	NA	NA
	XLOC_000767	1	105780722	105847981	+	protein_coding	NA	FALSE	protein_coding	5022	1294	0.361302	protein_coding	7.33169	11.6034	23.9757	29.9112	14.5689	15.8652	44.7404	24.8186	18.089	9.65752	no	mRNA	NA	NA	NA	NA	ENSMUSG00000026321	protein_coding	NA	NA	NA	NA
	XLOC_000768	1	105870490	105877477	+	lncRNA	NA	TRUE	none	902	405	NA	lncRNA	0	0	0	0	0	0	0	0	0	0	no	NA	NA	NA	NA	NA	Necsulea_Locus_81062	lncRNA	NA	NA	NA	NA
	XLOC_000769	1	105887009	105888262	+	lncRNA	NA	TRUE	none	838	747	NA	lncRNA	0	0	0.88799	0	0	0	0	0	0	0.965752	no	NA	NA	NA	NA	NA	Necsulea_Locus_81169	lncRNA	NA	NA	NA	NA
	XLOC_000770	1	105945075	105945214	+	lncRNA	NA	FALSE	none	139	0	NA	lncRNA	0	0	0	0	0	0	0	0	0	0	no	NA	NA	NA	NA	NA	Necsulea_blastnGorilla.Locus_105427	Overlap	NA	NA	NA	NA
	XLOC_000771	1	105945553	105945660	+	snRNA	NA	FALSE	none	107	104	NA	lncRNA	0	0	0	0	0	0	0	0	0	0	no	NA	NA	NA	NA	NA	ENSMUSG00000089206	snRNA	NA	NA	NA	NA
	XLOC_000772	1	105971770	105972616	+	lncRNA	NA	TRUE	none	299	105	NA	lncRNA	0	0	0	0	0	0	0	0	0	0	no	NA	NA	NA	NA	NA	Necsulea_Locus_80551	lncRNA	NA	NA	NA	NA
	XLOC_000773	1	105990132	106034444	+	protein_coding	NA	FALSE	protein_coding	7396	208	0.500365	protein_coding	601.199	614.98	453.763	487.862	412.093	335.285	471.638	440.779	472.218	375.678	yes	mRNA	17	400	41	206	ENSMUSG00000038866	protein_coding	25.416	0.0293303	43.7154	0.210248
	XLOC_000774	1	106090067	106091015	+	processed_pseudogene	NA	FALSE	none	948	0	NA	lncRNA	0	2.32068	0	0	1.04064	0	0	0	0	0.965752	no	NA	NA	NA	NA	NA	ENSMUSG00000097612	processed_pseudogene	NA	NA	NA	NA
	XLOC_000775	1	106171751	106394250	+	protein_coding	NA	FALSE	protein_coding	6226	265	1.25842	protein_coding	289.602	337.659	247.749	421.851	517.197	465.38	476.299	421.917	600.745	576.554	yes	mRNA	10	401	10	219	ENSMUSG00000044340	protein_coding	15.5334	0.392544	18.0054	-0.347857
	XLOC_000776	1	106401218	106401294	+	lncRNA	NA	TRUE	none	76	0	NA	lncRNA	0	0	0.88799	0	0	1.05768	0.932091	0	0	0.965752	no	NA	NA	NA	NA	NA	Necsulea_blastnGorilla.CUFF.87872	TooShort	NA	NA	NA	NA
	XLOC_000777	1	106798058	106798865	+	NA	NA	FALSE	none	807	78	0.556949	lncRNA	0	1.16034	0.88799	1.03142	2.08128	1.05768	0	4.96372	9.52052	1.9315	no	NA	NA	NA	NA	NA	NA	NA	NA	NA	NA	NA
	XLOC_000778	1	106861172	106883348	+	protein_coding	NA	FALSE	none	2750	321	NA	protein_coding	0	2.32068	9.76789	4.12568	3.12191	3.17304	0.932091	0	0	0	no	mRNA	NA	NA	NA	NA	ENSMUSG00000067006	protein_coding	NA	NA	NA	NA
	XLOC_000779	1	106934448	106957080	+	protein_coding	NA	FALSE	none	1739	0	NA	protein_coding	0	0	0	0	0	0	0	0	0	0	no	NA	NA	NA	NA	NA	ENSMUSG00000059956	protein_coding	NA	NA	NA	NA
	XLOC_000780	1	106980983	107001195	+	nonsense_mediated_decay;protein_coding	NA	FALSE	none	1672	115	NA	protein_coding	0	0	0	0	0	0	0	0	0	0	no	NA	NA	NA	NA	NA	ENSMUSG00000048775	nonsense_mediated_decay,protein_coding	NA	NA	NA	NA
	XLOC_000781	1	107361928	107380475	+	protein_coding	NA	FALSE	none	2084	0	NA	protein_coding	0	0	0	0	0	0	0	0	0	0	no	NA	NA	NA	NA	NA	ENSMUSG00000026327	protein_coding	NA	NA	NA	NA
	XLOC_000782	1	107399654	107452689	+	protein_coding	NA	FALSE	none	1957	0	NA	protein_coding	0	0	0	1.03142	0	0	0	0	0	0	no	NA	NA	NA	NA	NA	ENSMUSG00000067001	protein_coding	NA	NA	NA	NA
	XLOC_000783	1	107511422	107549271	+	polymorphic_pseudogene;protein_coding;nonsense_mediated_decay	NA	FALSE	none	5566	187	NA	protein_coding	0	0	0	6.18852	0	0	0	0	0	0	no	NA	NA	NA	NA	NA	NA	NA	NA	NA	NA	NA
	XLOC_000784	1	107590005	107608909	+	protein_coding	NA	FALSE	none	3006	216	0.853553	protein_coding	9.16462	5.8017	1.77598	4.12568	3.12191	7.40377	3.72837	2.97823	0	0.965752	no	mRNA	NA	NA	NA	NA	ENSMUSG00000026315	protein_coding	NA	NA	NA	NA
	XLOC_000785	1	107687007	107693514	+	lncRNA	NA	TRUE	none	666	318	NA	lncRNA	0	0	0.88799	0	0	0	0	0	0	0	no	NA	NA	NA	NA	NA	Ensembl_ENSMUSG00000086161|Necsulea_ENSMUSG00000086161	lncRNA	NA	NA	NA	NA
	XLOC_000786	1	107892973	107893105	+	snoRNA	NA	FALSE	none	132	0	NA	lncRNA	0	0	0	0	0	0	0	0	0	0	no	NA	NA	NA	NA	NA	ENSMUSG00000077237	snoRNA	NA	NA	NA	NA
	XLOC_000787	1	107917293	107937736	+	lncRNA	NA	TRUE	none	424	76	NA	lncRNA	0	0	0	0	0	0	0	0	0	0	no	NA	NA	NA	NA	NA	Necsulea_Locus_81258	lncRNA	NA	NA	NA	NA
	XLOC_000788	1	107972309	108027245	+	lncRNA	NA	TRUE	none	2140	1352	NA	lncRNA	0	0	0	0	0	0	0	0	0	0	no	NA	NA	NA	NA	NA	Necsulea_Locus_80754	lncRNA	NA	NA	NA	NA
	XLOC_000789	1	108028775	108056873	+	lncRNA	NA	TRUE	none	706	169	NA	lncRNA	0	0	0	0	0	0	0	0	0	0	no	NA	NA	NA	NA	NA	Necsulea_Locus_81137	lncRNA	NA	NA	NA	NA
	XLOC_000790	1	108090727	108101395	+	lncRNA	NA	TRUE	none	244	44	NA	lncRNA	0	0	0	0	0	0	0	0	0	0	no	NA	NA	NA	NA	NA	Necsulea_Locus_80606	lncRNA	NA	NA	NA	NA
	XLOC_000791	1	109804759	109805044	+	lncRNA	NA	TRUE	none	285	285	NA	lncRNA	0	0	0	0	0	0	0	0	0	0	no	NA	NA	NA	NA	NA	Ensembl_ENSMUSG00000084741	lncRNA	NA	NA	NA	NA
	XLOC_000792	1	109982709	110140157	+	nonsense_mediated_decay;protein_coding	NA	FALSE	none	5574	100	NA	protein_coding	0	0	1.77598	3.09426	4.16255	2.11536	5.59255	2.97823	10.4726	15.452	no	NA	NA	NA	NA	NA	ENSMUSG00000026312	nonsense_mediated_decay,protein_coding	NA	NA	NA	NA
	XLOC_000793	1	110238634	110240232	+	lncRNA	NA	TRUE	none	446	291	NA	lncRNA	0	0	0	0	0	0	0	0	0	0	no	NA	NA	NA	NA	NA	Necsulea_Locus_80332	lncRNA	NA	NA	NA	NA
	XLOC_000794	1	111150375	111179002	+	lncRNA	NA	TRUE	none	809	655	NA	lncRNA	0	0	0	0	0	0	0	0	0	0	no	NA	NA	NA	NA	NA	Necsulea_Locus_81826|Necsulea_Locus_80652	lncRNA	NA	NA	NA	NA
	XLOC_000795	1	112467910	112468046	+	snoRNA	NA	FALSE	none	136	0	NA	lncRNA	0	0	0	0	0	0	0	0	0	0	no	NA	NA	NA	NA	NA	ENSMUSG00000088691	snoRNA	NA	NA	NA	NA
	XLOC_000796	1	113915983	113918416	+	lncRNA	NA	TRUE	none	499	0	NA	lncRNA	0	0	0	0	0	0	0	0	0	0	no	NA	NA	NA	NA	NA	Ensembl_ENSMUSG00000097648|Necsulea_Locus_80604|Guttman_lincRNA_282	lncRNA	11.6191	-0.0373487	NA	NA
	XLOC_000797	1	113969913	113973382	+	lncRNA	NA	TRUE	none	380	0	NA	lncRNA	0	0	0	0	0	0	0	0	0	0	no	NA	NA	NA	NA	NA	Necsulea_CUFF.133395	lncRNA	NA	NA	NA	NA
	XLOC_000798	1	115241760	115244698	+	lncRNA	NA	TRUE	none	792	631	NA	lncRNA	0	0	0	0	0	0	0	0	0	0	no	NA	NA	NA	NA	NA	Necsulea_Locus_80508	lncRNA	NA	NA	NA	NA
	XLOC_000799	1	115684755	116582026	+	protein_coding	NA	FALSE	none	5651	118	NA	protein_coding	0	0	0	0	0	0	0	0	0.952052	0.965752	no	NA	NA	NA	NA	NA	ENSMUSG00000070695	protein_coding	NA	NA	NA	NA
	XLOC_000800	1	116803192	116821850	+	protein_coding	NA	FALSE	none	1260	0	NA	protein_coding	0	0	0	0	0	0	0	0	0	0	no	NA	NA	NA	NA	NA	ENSMUSG00000094429	protein_coding	NA	NA	NA	NA
	XLOC_000801	1	117389103	117391120	+	lncRNA	NA	TRUE	none	315	217	NA	lncRNA	0	0	0	0	0	0	0	0	0	0	no	NA	NA	NA	NA	NA	Necsulea_Locus_81387	lncRNA	NA	NA	NA	NA
	XLOC_000802	1	117536300	117536464	+	snRNA	NA	FALSE	none	164	161	NA	lncRNA	0	0	0	0	0	0	0	0	0	0	no	NA	NA	NA	NA	NA	ENSMUSG00000065865	snRNA	NA	NA	NA	NA
	XLOC_000803	1	117561229	117561339	+	miRNA	NA	FALSE	none	110	110	NA	lncRNA	0	0	0	0	0	0	0	0	0	0	no	NA	NA	NA	NA	NA	ENSMUSG00000098815	miRNA	NA	NA	NA	NA
	XLOC_000804	1	118321838	118333822	+	protein_coding	NA	FALSE	protein_coding	1965	108	1.94544	protein_coding	1116.25	670.676	1694.28	1523.41	654.561	863.068	515.447	659.183	476.026	626.773	yes	mRNA	19	158	38	249	ENSMUSG00000026377	protein_coding	225.588	0.142825	140.581	0.123113
	XLOC_000805	1	118388314	118609716	+	protein_coding	NA	FALSE	protein_coding	8452	504	1.01088	protein_coding	914.629	1123.21	1493.6	1974.14	1995.94	2319.49	2074.84	2587.09	2190.67	2513.85	yes	mRNA	79	1025	34	118	ENSMUSG00000064302	protein_coding	83.2643	0.00114225	225.05	-0.0301708
	XLOC_000806	1	118627944	118685167	+	snRNA;protein_coding	NA	FALSE	none	9269	3036	NA	protein_coding	12740.6	22880.7	2709.26	1501.75	700.349	569.032	343.942	258.114	112.342	56.0136	no	NA	NA	NA	NA	NA	NA	NA	NA	NA	NA	NA
	XLOC_000807	1	118954219	118954300	+	miRNA	NA	FALSE	none	81	70	NA	lncRNA	0	0	0	0	0	0	0	0	0	0	no	NA	NA	NA	NA	NA	ENSMUSG00000098273	miRNA	NA	NA	NA	NA
	XLOC_000808	1	119058468	119059848	+	lncRNA	NA	FALSE	none	1380	844	NA	lncRNA	1.83292	1.16034	0	0	1.04064	0	5.59255	4.96372	2.85616	0	no	NA	NA	NA	NA	NA	Ensembl_ENSMUSG00000097408	Overlap	NA	NA	NA	NA
	XLOC_000809	1	119077405	119086080	+	lncRNA	NA	TRUE	none	406	38	NA	lncRNA	5.49877	0	1.77598	3.09426	1.04064	2.11536	0	0	0	0	no	NA	NA	NA	NA	NA	Guttman_lincRNA_283	lncRNA	NA	NA	NA	NA
	XLOC_000810	1	119099999	119100881	+	NA	NA	TRUE	none	882	307	NA	lncRNA	4.58231	2.32068	5.32794	1.03142	0	0	0	0	0	0	no	NA	NA	NA	NA	NA	NA	NA	NA	NA	NA	NA
	XLOC_000811	1	119157585	119158565	+	processed_pseudogene	NA	FALSE	none	980	0	2.44975	lncRNA	0	0	1.77598	2.06284	0	1.05768	0	0	0	0	no	NA	NA	NA	NA	NA	ENSMUSG00000096939	processed_pseudogene	NA	NA	NA	NA
	XLOC_000812	1	119201409	119210205	+	lncRNA	NA	TRUE	none	762	73	NA	lncRNA	0	0	0	0	0	0	0	0	0	0	no	NA	NA	NA	NA	NA	Necsulea_Locus_81063	lncRNA	NA	NA	NA	NA
	XLOC_000813	1	119271962	119272874	+	lncRNA	NA	TRUE	none	341	23	NA	lncRNA	0	0	0	0	0	0	0	0	0	0	no	NA	NA	NA	NA	NA	Necsulea_Locus_80698	lncRNA	NA	NA	NA	NA
	XLOC_000814	1	119305552	119320595	+	lncRNA	NA	TRUE	lincRNA	2206	735	NA	lncRNA	1.83292	2.32068	12.4319	1.03142	9.36574	0	0	0	0.952052	0	no	lncRNA	NA	NA	NA	NA	Guttman_lincRNA_284|Necsulea_Locus_80400	lncRNA	NA	NA	NA	NA
	XLOC_000815	1	119438483	119439639	+	lncRNA	NA	TRUE	none	493	299	NA	lncRNA	0	0	0	0	0	0	0	0.992745	0	0	no	NA	NA	NA	NA	NA	Necsulea_CUFF.133504|Necsulea_Locus_82100|Guttman_lincRNA_285	lncRNA	NA	NA	NA	NA
	XLOC_000816	1	119443149	119445546	+	lncRNA	NA	TRUE	none	662	28	NA	lncRNA	0	0	0	0	0	0	0	0	0	0	no	NA	NA	NA	NA	NA	Necsulea_CUFF.133504|Necsulea_Locus_82100|Guttman_lincRNA_285	lncRNA	NA	NA	NA	NA
	XLOC_000817	1	119453902	119454514	+	lncRNA	NA	TRUE	none	485	216	NA	lncRNA	0	0	0	0	0	0	0	0	0	0	no	NA	NA	NA	NA	NA	Necsulea_Locus_80726	lncRNA	NA	NA	NA	NA
	XLOC_000818	1	119526144	119528983	+	protein_coding	NA	FALSE	protein_coding	2839	45	NA	protein_coding	267.607	170.57	240.645	146.462	108.226	132.21	194.807	140.97	174.226	225.02	yes	mRNA	13	185	72	219	ENSMUSG00000098923	protein_coding	NA	NA	NA	NA
	XLOC_000819	1	119530210	119530314	+	snRNA	NA	FALSE	none	104	101	NA	lncRNA	0	0	0	0	0	0	0.932091	0	0.952052	0	no	NA	NA	NA	NA	NA	ENSMUSG00000084505	snRNA	NA	NA	NA	NA
	XLOC_000820	1	119787768	119788086	+	processed_pseudogene	NA	FALSE	none	318	0	1.76358	lncRNA	0	0	0	0	0	0	0	0	0	0	no	NA	NA	NA	NA	NA	ENSMUSG00000091876	processed_pseudogene	NA	NA	NA	NA
	XLOC_000821	1	119817762	119818125	+	processed_pseudogene	NA	FALSE	none	363	0	0.530818	lncRNA	0	0	0	0	0	0	0	0	0	0	no	NA	NA	NA	NA	NA	ENSMUSG00000090277	processed_pseudogene	NA	NA	NA	NA
	XLOC_000822	1	119986794	119987314	+	processed_pseudogene	NA	FALSE	none	520	0	NA	lncRNA	0	0	0	0	0	0	0	0	0	0	no	NA	NA	NA	NA	NA	ENSMUSG00000092245	processed_pseudogene	NA	NA	NA	NA
	XLOC_000823	1	120006979	120063528	+	protein_coding	NA	FALSE	none	1918	26	NA	protein_coding	0	0	0	2.06284	0	0	0.932091	1.98549	1.9041	0.965752	no	NA	NA	NA	NA	NA	ENSMUSG00000026387	protein_coding	NA	NA	NA	NA
	XLOC_000824	1	120086898	120087575	+	lncRNA	NA	TRUE	none	490	137	NA	lncRNA	0	0	1.77598	0	2.08128	0	0	0	0	0	no	NA	NA	NA	NA	NA	Necsulea_Locus_80487|Necsulea_Locus_82283	lncRNA	NA	NA	NA	NA
	XLOC_000825	1	120103935	120105747	+	lncRNA	NA	TRUE	none	361	19	NA	lncRNA	0	0	0	0	0	0	0	0	0	0	no	NA	NA	NA	NA	NA	Necsulea_Locus_80573	lncRNA	NA	NA	NA	NA
	XLOC_000826	1	120121181	120188189	+	protein_coding	NA	FALSE	protein_coding	1627	322	1.35611	protein_coding	26.5774	20.8861	21.3117	33.0054	29.1379	29.6151	25.1665	22.8331	23.8013	17.3835	no	mRNA	NA	NA	NA	NA	ENSMUSG00000026388	protein_coding	NA	NA	14.4159	-0.259608
	XLOC_000827	1	120340581	120343171	+	protein_coding	NA	FALSE	none	1997	46	NA	protein_coding	0	0	0.88799	0	1.04064	0	1.86418	0	1.9041	1.9315	no	NA	NA	NA	NA	NA	ENSMUSG00000036907	protein_coding	NA	NA	NA	NA
	XLOC_000828	1	120435465	120438401	+	lncRNA	NA	TRUE	none	1662	149	NA	lncRNA	0	0	0	0	0	0	0	0	0	0	no	NA	NA	NA	NA	NA	Necsulea_Locus_82664|Necsulea_Locus_81419	lncRNA	NA	NA	NA	NA
	XLOC_000829	1	120465409	120467503	+	lncRNA	NA	TRUE	none	633	307	NA	lncRNA	0	0	0	0	0	0	0	0	0	0	no	NA	NA	NA	NA	NA	Necsulea_Locus_80757	lncRNA	NA	NA	NA	NA
	XLOC_000830	1	120602417	120609296	+	protein_coding	NA	FALSE	none	3928	344	0.718209	protein_coding	0.916462	1.16034	0.88799	0	6.24383	0	0	0	1.9041	13.5205	no	NA	NA	NA	NA	NA	ENSMUSG00000058665	protein_coding.neuron.differentiation	NA	NA	NA	NA
	XLOC_000831	1	120868819	120869800	+	lncRNA	NA	TRUE	none	95	0	NA	lncRNA	0	0	0	0	0	0	0	0	0	0	no	NA	NA	NA	NA	NA	Necsulea_blastnMacaque.Locus_61430	TooShort	NA	NA	NA	NA
	XLOC_000832	1	121087375	121137572	+	lncRNA	lncRNA	TRUE	none	6291	1613	NA	lncRNA	0.916462	1.16034	0.88799	0	1.04064	1.05768	0	0	5.71231	11.589	no	NA	NA	NA	NA	NA	Guttman_lincRNA_286|Ensembl_ENSMUSG00000097881|Necsulea_ENSMUSG00000086664|Necsulea_Locus_82303	lncRNA	NA	NA	NA	NA
	XLOC_000833	1	121102749	121112996	+	lncRNA	lncRNA	TRUE	none	168	103	NA	lncRNA	0	0	0	0	0	0	0	0	0	0	no	NA	NA	NA	NA	NA	Guttman_lincRNA_286|Ensembl_ENSMUSG00000097881|Necsulea_ENSMUSG00000086664|Necsulea_Locus_82303	lncRNA	NA	NA	NA	NA
	XLOC_000834	1	121113015	121113214	+	lncRNA	lncRNA	TRUE	none	199	122	NA	lncRNA	0	0	0	0	0	0	0	0	0	0	no	NA	NA	NA	NA	NA	Guttman_lincRNA_286|Ensembl_ENSMUSG00000097881|Necsulea_ENSMUSG00000086664|Necsulea_Locus_82303	lncRNA	NA	NA	NA	NA
	XLOC_000835	1	121177292	121177424	+	lncRNA	NA	TRUE	none	132	0	NA	lncRNA	0	0	0	0	0	0	0	0	0	0	no	NA	NA	NA	NA	NA	Necsulea_blastnChicken.Locus_4937	TooShort	NA	NA	NA	NA
	XLOC_000836	1	121224329	121227522	+	lncRNA	NA	TRUE	none	442	0	NA	lncRNA	0	0	0	0	0	0	0	0	0	0	no	NA	NA	NA	NA	NA	Necsulea_blastnHuman.ENSG00000226856	lncRNA	NA	NA	NA	NA
	XLOC_000837	1	121328709	121332780	+	protein_coding	NA	FALSE	protein_coding	4071	1188	NA	lncRNA	4.58231	8.12237	1.77598	2.06284	20.8128	14.8075	33.5553	23.8259	42.8424	47.3219	no	mRNA	NA	NA	NA	NA	ENSMUSG00000003721	protein_coding	35.9061	0.0140583	148.668	-0.144581
	XLOC_000838	1	121333015	121333866	+	NA	NA	FALSE	none	851	295	NA	lncRNA	0	3.48102	0	0	2.08128	1.05768	3.72837	4.96372	4.76026	8.69177	no	NA	NA	NA	NA	NA	NA	NA	NA	NA	NA	NA
	XLOC_000839	1	121431048	121506460	+	protein_coding	NA	FALSE	protein_coding	7274	1472	1.16201	protein_coding	681.847	750.739	383.611	363.06	659.765	567.975	681.359	664.146	617.882	531.164	yes	mRNA	8	409	12	71	ENSMUSG00000026339	protein_coding	20.0582	0.0278944	60.8109	0.416817
	XLOC_000840	1	121520582	121521047	+	processed_pseudogene	NA	FALSE	none	465	0	1.76309	lncRNA	0	0	0	0	0	0	0	0	0	0	no	NA	NA	NA	NA	NA	ENSMUSG00000081130	processed_pseudogene	NA	NA	NA	NA
	XLOC_000841	1	121771239	121771351	+	lncRNA	NA	TRUE	none	112	0	NA	lncRNA	0	0	0	0	0	0	0	0	0	0	no	NA	NA	NA	NA	NA	Necsulea_blastnMacaque.Locus_61674	TooShort	NA	NA	NA	NA
	XLOC_000842	1	122510548	122510697	+	snRNA	NA	FALSE	none	149	148	NA	lncRNA	0	0	0	0	0	0	0	0	0	0	no	NA	NA	NA	NA	NA	ENSMUSG00000089274	snRNA	NA	NA	NA	NA
	XLOC_000843	1	122553172	122553316	+	snoRNA	NA	FALSE	none	144	4	NA	lncRNA	0	0	0	0	0	0	0	0	0	0	no	NA	NA	NA	NA	NA	ENSMUSG00000089190	snoRNA	NA	NA	NA	NA
	XLOC_000844	1	123029098	123029190	+	lncRNA	NA	TRUE	none	92	0	NA	lncRNA	0	0	0	0	0	0	0	0	0	0	no	NA	NA	NA	NA	NA	Necsulea_blastnMacaque.Locus_62170	TooShort	NA	NA	NA	NA
	XLOC_000845	1	123095383	123095443	+	miRNA	NA	FALSE	none	60	50	NA	lncRNA	0	0	0	0	0	0	0	0	0	0	no	NA	NA	NA	NA	NA	ENSMUSG00000088912	miRNA	NA	NA	NA	NA
	XLOC_000846	1	124044822	124046412	+	pseudogene	NA	FALSE	none	1590	126	NA	lncRNA	0	0	0	0	0	0	0	0	0	1.9315	no	NA	NA	NA	NA	NA	ENSMUSG00000073586	pseudogene	NA	NA	NA	NA
	XLOC_000847	1	124490855	124490959	+	snRNA	NA	FALSE	none	104	104	0.107966	lncRNA	0	0	0	0	0	0	0	0	0	0	no	NA	NA	NA	NA	NA	ENSMUSG00000065340	snRNA	NA	NA	NA	NA
	XLOC_000848	1	124911749	124917254	+	lncRNA	NA	TRUE	none	295	188	NA	lncRNA	0	0	0	0	0	0	0	0	0	0	no	NA	NA	NA	NA	NA	Necsulea_Locus_80281	lncRNA	NA	NA	NA	NA
	XLOC_000849	1	125435867	125436796	+	NA	NA	FALSE	none	929	159	NA	lncRNA	1.83292	2.32068	4.43995	3.09426	2.08128	4.23072	1.86418	1.98549	8.56847	2.89726	no	NA	NA	NA	NA	NA	NA	NA	NA	NA	NA	NA
	XLOC_000850	1	125560643	125595836	+	protein_coding	NA	FALSE	protein_coding	2923	23	0.870498	protein_coding	110.892	104.431	126.095	124.802	193.559	235.863	364.448	340.512	347.499	336.082	yes	mRNA	1	51	9	51	ENSMUSG00000026342	protein_coding	NA	NA	36.7326	0.108006
	XLOC_000851	1	125676994	125873862	+	protein_coding	NA	FALSE	protein_coding	2691	0	1.75069	protein_coding	0	0	0.88799	3.09426	3.12191	3.17304	51.265	27.7969	26.6575	15.452	no	NA	NA	NA	NA	NA	ENSMUSG00000026343	protein_coding	NA	NA	NA	NA
	XLOC_000852	1	127204985	127488788	+	protein_coding	snoRNA	FALSE	none	8984	602	0.725055	protein_coding	224.533	294.726	109.223	188.75	294.501	224.228	479.095	471.554	546.478	548.547	no	NA	NA	NA	NA	NA	ENSMUSG00000036155	protein_coding	NA	NA	NA	NA
	XLOC_000853	1	127331812	127331941	+	snoRNA	protein_coding	FALSE	none	129	0	0.101638	lncRNA	0	0	0	0	2.08128	0	2.79627	0.992745	0	1.9315	no	NA	NA	NA	NA	NA	ENSMUSG00000093146	snoRNA	NA	NA	NA	NA
	XLOC_000854	1	127375130	127375239	+	snoRNA	protein_coding	FALSE	none	109	0	0.0800609	lncRNA	1.83292	0	0	0	0	1.05768	0	0	0	0	no	NA	NA	NA	NA	NA	ENSMUSG00000065687	snoRNA	NA	NA	NA	NA
	XLOC_000855	1	127729412	127767564	+	protein_coding	NA	FALSE	none	2303	414	0.339611	protein_coding	5.49877	3.48102	0.88799	1.03142	0	1.05768	1.86418	0	0	0	no	NA	NA	NA	NA	NA	ENSMUSG00000026348	protein_coding	NA	NA	NA	NA
	XLOC_000856	1	127774163	127808207	+	protein_coding	NA	FALSE	protein_coding	7194	122	0.555243	protein_coding	2602.75	2340.4	2534.32	2050.46	1975.13	1639.41	1459.66	1552.65	1670.85	1644.68	yes	mRNA	50	651	50	392	ENSMUSG00000026349	protein_coding	105.215	0.124356	129.849	-0.00134028
	XLOC_000857	1	127868772	127943868	+	protein_coding	NA	FALSE	protein_coding	4243	61	1.1961	protein_coding	851.393	790.191	896.869	781.816	476.612	578.551	548.07	398.091	465.554	479.013	yes	mRNA	16	400	14	213	ENSMUSG00000036104	protein_coding	48.3343	0.0214279	78.8766	-0.146884
	XLOC_000858	1	128038526	128039022	+	processed_pseudogene	NA	FALSE	none	496	0	1.48062	protein_coding	1.83292	1.16034	0	1.03142	1.04064	3.17304	0	0	0.952052	0.965752	no	NA	NA	NA	NA	NA	ENSMUSG00000058603	processed_pseudogene	NA	NA	NA	NA
	XLOC_000859	1	128103298	128238580	+	protein_coding	miRNA	FALSE	none	9199	866	1.52252	protein_coding	372.083	574.368	463.531	463.107	1291.43	778.453	743.809	1103.93	881.601	782.259	no	NA	NA	NA	NA	NA	ENSMUSG00000056211	protein_coding	115.993	-0.105853	296.645	-0.0247144
	XLOC_000860	1	128202354	128202436	+	miRNA	protein_coding	FALSE	none	82	0	NA	lncRNA	0	1.16034	0.88799	0	3.12191	1.05768	2.79627	1.98549	0.952052	1.9315	no	NA	NA	NA	NA	NA	ENSMUSG00000065520	miRNA	NA	NA	NA	NA
	XLOC_000861	1	128242215	128243045	+	NA	NA	FALSE	none	830	210	NA	lncRNA	1.83292	1.16034	0	2.06284	2.08128	4.23072	1.86418	11.9129	0.952052	1.9315	no	NA	NA	NA	NA	NA	NA	NA	NA	NA	NA	NA
	XLOC_000862	1	128244159	128279377	+	protein_coding	NA	FALSE	protein_coding	4121	529	2.12178	protein_coding	1250.97	1007.17	935.941	946.843	818.982	951.913	1014.12	938.144	1080.58	1131.86	yes	mRNA	14	317	15	376	ENSMUSG00000026353	protein_coding	74.8887	-0.142277	258.827	-0.405717
	XLOC_000863	1	128490039	128490173	+	snoRNA	NA	FALSE	none	134	0	NA	lncRNA	0	0	0	0	0	0	0	0	0	0	no	NA	NA	NA	NA	NA	ENSMUSG00000088196	snoRNA	NA	NA	NA	NA
	XLOC_000864	1	128763009	128784391	+	lncRNA	NA	TRUE	none	345	35	NA	lncRNA	0	0	0	0	0	0	0	0	0	0	no	NA	NA	NA	NA	NA	Necsulea_Locus_80973|Ensembl_ENSMUSG00000097283	lncRNA	NA	NA	NA	NA
	XLOC_000865	1	128976673	128976758	+	lncRNA	NA	TRUE	none	85	0	NA	lncRNA	0	0	0	0	0	0	0	0	0	0	no	NA	NA	NA	NA	NA	Necsulea_blastnMacaque.Locus_143534	TooShort	NA	NA	NA	NA
	XLOC_000866	1	129273343	130219278	+	protein_coding	NA	FALSE	none	7049	301	NA	protein_coding	0	0	0	2.06284	1.04064	0	3.72837	0	16.1849	8.69177	no	NA	NA	NA	NA	NA	ENSMUSG00000042581	protein_coding	NA	NA	NA	NA
	XLOC_000867	1	130272845	130273360	+	lncRNA	NA	TRUE	none	202	30	NA	lncRNA	0	0	0	0	0	0	0	0	0	0	no	NA	NA	NA	NA	NA	Ensembl_ENSMUSG00000086633|Necsulea_ENSMUSG00000086633|Necsulea_Locus_81060	lncRNA	NA	NA	NA	NA
	XLOC_000868	1	130715956	130726359	+	protein_coding	NA	FALSE	protein_coding	9499	641	0.14162	protein_coding	201.622	210.021	182.926	198.033	200.843	192.498	219.974	235.281	289.424	338.979	no	mRNA	NA	NA	NA	NA	ENSMUSG00000046404	protein_coding	NA	NA	24.5256	0.286859
	XLOC_000869	1	130731975	130744621	+	protein_coding	NA	FALSE	protein_coding	2908	21	NA	protein_coding	32.0762	6.96204	18.6478	18.5656	14.5689	11.6345	55.9255	26.8041	33.3218	31.8698	yes	mRNA	5	69	3	33	ENSMUSG00000042510	protein_coding	NA	NA	11.2696	0.307863
	XLOC_000870	1	130800901	130814740	+	protein_coding	NA	FALSE	none	1911	0	NA	protein_coding	0	0	0.88799	0	0	0	0	0	0	0	no	NA	NA	NA	NA	NA	ENSMUSG00000026415	protein_coding	NA	NA	NA	NA
	XLOC_000871	1	130826683	130852249	+	protein_coding	NA	FALSE	none	4105	368	NA	protein_coding	0	0	0	0	0	1.05768	11.1851	7.94196	5.71231	0	no	NA	NA	NA	NA	NA	ENSMUSG00000026417	protein_coding	NA	NA	NA	NA
	XLOC_000872	1	130865668	130880790	+	protein_coding	NA	FALSE	none	1599	0	NA	protein_coding	0	0	0	0	0	0	0	0.992745	0	0	no	NA	NA	NA	NA	NA	ENSMUSG00000042474	protein_coding	NA	NA	NA	NA
	XLOC_000873	1	131019844	131024974	+	protein_coding	NA	FALSE	protein_coding	1310	0	NA	protein_coding	0	1.16034	5.32794	13.4085	9.36574	2.11536	0.932091	0	0	1.9315	no	mRNA	NA	NA	NA	NA	ENSMUSG00000016529	protein_coding	NA	NA	NA	NA
	XLOC_000874	1	131138388	131139630	+	NA	NA	FALSE	none	1242	155	NA	lncRNA	6.41523	6.96204	6.21593	8.25136	0	4.23072	0.932091	2.97823	11.4246	6.76027	no	lncRNA	NA	NA	NA	NA	NA	NA	NA	NA	NA	NA
	XLOC_000875	1	131153180	131187658	+	nonsense_mediated_decay;protein_coding	NA	FALSE	none	6368	449	0.992392	protein_coding	1208.81	1112.77	1666.76	1516.19	677.455	760.473	562.983	500.343	403.67	404.65	no	NA	NA	NA	NA	NA	ENSMUSG00000026427	nonsense_mediated_decay,protein_coding	314.795	0.0279563	108.253	-0.0465342
	XLOC_000876	1	131527902	131539872	+	protein_coding	NA	FALSE	protein_coding	2191	271	1.13381	protein_coding	97.1449	80.0634	110.999	81.4822	47.8694	43.3649	42.8762	68.4994	45.6985	41.5274	yes	mRNA	0	10	40	236	ENSMUSG00000055184	protein_coding	NA	NA	NA	NA
	XLOC_000877	1	131599238	131612000	+	protein_coding	NA	FALSE	none	4023	689	NA	protein_coding	2.74938	0	0	0	0	4.23072	0	0	0	0	no	NA	NA	NA	NA	NA	ENSMUSG00000026432	protein_coding	NA	NA	NA	NA
	XLOC_000878	1	131638305	131675503	+	protein_coding	NA	FALSE	none	2124	394	NA	protein_coding	0	0	0	0	1.04064	0	0	1.98549	0.952052	0	no	NA	NA	NA	NA	NA	ENSMUSG00000004552	protein_coding	NA	NA	NA	NA
	XLOC_000879	1	131688694	131713542	+	protein_coding	NA	FALSE	none	2635	168	0.899437	protein_coding	0	0	6.21593	4.12568	3.12191	4.23072	0	0.992745	0.952052	0.965752	no	mRNA	NA	NA	NA	NA	ENSMUSG00000052688	protein_coding	NA	NA	NA	NA
	XLOC_000880	1	131744021	131771504	+	protein_coding	NA	FALSE	none	4828	125	NA	protein_coding	0	3.48102	9.76789	1.03142	12.4877	1.05768	13.0493	3.97098	0.952052	0.965752	no	mRNA	NA	NA	NA	NA	ENSMUSG00000042268	protein_coding	NA	NA	NA	NA
	XLOC_000881	1	131797380	131821473	+	protein_coding	NA	FALSE	protein_coding	4493	350	NA	protein_coding	38.4914	61.498	53.2794	39.194	46.8287	46.538	27.0306	32.7606	12.3767	10.6233	yes	mRNA	2	155	33	70	ENSMUSG00000042251	protein_coding	NA	NA	NA	NA
	XLOC_000882	1	131827976	131848865	+	protein_coding	NA	FALSE	protein_coding	4697	274	0.581547	protein_coding	410.575	445.57	260.181	250.635	261.2	270.766	205.06	210.462	246.582	230.815	yes	mRNA	22	757	32	224	ENSMUSG00000013275	protein_coding	13.5299	0.0975671	61.542	0.225327
	XLOC_000883	1	131867223	131873047	+	nonsense_mediated_decay;protein_coding	NA	FALSE	none	1510	127	NA	protein_coding	68.7346	66.1393	45.2875	28.8798	24.9753	25.3843	39.1478	31.7678	41.8903	44.4246	no	NA	NA	NA	NA	NA	ENSMUSG00000026433	nonsense_mediated_decay,protein_coding	NA	NA	10.1558	-0.0120988
	XLOC_000884	1	131910457	131936321	+	protein_coding	NA	FALSE	protein_coding	6096	347	0.553445	protein_coding	11238.6	11750.8	9633.8	9199.23	8484.32	9582.59	10009.7	9723.94	8214.31	8977.63	yes	mRNA	136	1178	184	985	ENSMUSG00000026434	protein_coding	955.152	0.135164	1136	-0.057147
	XLOC_000885	1	131947937	131948888	+	NA	NA	TRUE	none	951	86	NA	lncRNA	1.83292	4.64136	0	2.06284	5.20319	4.23072	2.79627	8.9347	4.76026	3.86301	no	NA	NA	NA	NA	NA	NA	NA	NA	NA	NA	NA
	XLOC_000886	1	131962958	131983026	+	protein_coding	NA	FALSE	protein_coding	3496	53	NA	protein_coding	66.9017	106.751	39.0715	27.8483	71.804	41.2496	157.523	98.2818	221.828	135.205	yes	mRNA	2	47	0	32	ENSMUSG00000026435	protein_coding	NA	NA	26.4469	0.332895
	XLOC_000887	1	132007606	132032612	+	nonsense_mediated_decay;protein_coding	NA	FALSE	none	6506	482	0.101293	protein_coding	129.221	178.692	131.422	153.682	341.329	235.863	289.88	414.967	407.478	411.411	no	NA	NA	NA	NA	NA	ENSMUSG00000026436	nonsense_mediated_decay,protein_coding	11.8983	-0.169547	39.3687	-0.0736215
	XLOC_000888	1	132100638	132100754	+	snRNA	NA	FALSE	none	116	116	NA	lncRNA	0	0	0	0	0	0	0	0	0	0	no	NA	NA	NA	NA	NA	ENSMUSG00000088779	snRNA	NA	NA	NA	NA
	XLOC_000889	1	132150663	132151391	+	lncRNA	NA	TRUE	none	414	0	NA	lncRNA	0	0	0	0	0	0	0	0	0	0	no	NA	NA	NA	NA	NA	Necsulea_Locus_81332	lncRNA	NA	NA	NA	NA
	XLOC_000890	1	132152752	132154194	+	lncRNA	NA	TRUE	none	1070	164	NA	lncRNA	0	0	0.88799	0	0	1.05768	0	0	0.952052	0.965752	no	NA	NA	NA	NA	NA	Necsulea_CUFF.135011	lncRNA	NA	NA	NA	NA
	XLOC_000891	1	132190177	132257381	+	protein_coding;miRNA	NA	FALSE	none	18972	1619	0.485281	lncRNA	27.4938	19.7258	11.5439	21.6598	217.493	185.094	348.602	380.221	205.643	277.171	no	NA	NA	NA	NA	NA	NA	NA	NA	NA	NA	NA
	XLOC_000892	1	132284446	132284809	+	processed_pseudogene	NA	FALSE	none	363	0	1.09477	lncRNA	1.83292	0	0.88799	0	2.08128	0	0	0	0.952052	0	no	NA	NA	NA	NA	NA	ENSMUSG00000089808	processed_pseudogene	NA	NA	NA	NA
	XLOC_000893	1	132298625	132307357	+	protein_coding	NA	FALSE	protein_coding	4269	202	0.446285	protein_coding	0	1.16034	0.88799	1.03142	6.24383	0	96.0054	37.7243	20.9452	17.3835	no	NA	NA	NA	NA	NA	ENSMUSG00000042115	protein_coding	NA	NA	NA	NA
	XLOC_000894	1	132316116	132333488	+	protein_coding	NA	FALSE	protein_coding	3140	114	0.310433	protein_coding	78.8157	161.287	47.9514	79.4193	169.624	186.152	301.066	160.825	351.307	277.171	yes	mRNA	9	256	12	92	ENSMUSG00000009772	protein_coding	NA	NA	NA	NA
	XLOC_000895	1	132342316	132350814	+	lncRNA	NA	TRUE	none	830	68	NA	lncRNA	0	0	0	0	0	0	0.932091	0.992745	0	0	no	NA	NA	NA	NA	NA	Necsulea_Locus_80161	lncRNA	NA	NA	NA	NA
	XLOC_000896	1	132417452	132466959	+	protein_coding	NA	FALSE	protein_coding	6513	153	0.692102	protein_coding	332.676	547.68	152.734	150.587	237.265	229.517	394.275	339.519	440.8	431.691	yes	mRNA	4	192	10	81	ENSMUSG00000042046	protein_coding	NA	NA	79.2605	0.271618
	XLOC_000897	1	132470260	132508935	+	protein_coding	NA	FALSE	protein_coding	10389	1089	1.03912	protein_coding	1922.74	1925	1054.93	963.346	731.569	804.895	697.204	722.718	752.121	676.027	yes	mRNA	16	748	10	164	NA	NA	NA	NA	NA	NA
	XLOC_000898	1	132791134	132792647	+	lncRNA	NA	TRUE	none	429	363	NA	lncRNA	0	0	0	0	0	0	0	0	0	0	no	NA	NA	NA	NA	NA	Necsulea_CUFF.135110	lncRNA	NA	NA	NA	NA
	XLOC_000899	1	132845736	132845953	+	lncRNA	NA	TRUE	none	217	0	NA	lncRNA	0	1.16034	0	0	0	0	0	0	0	0	no	NA	NA	NA	NA	NA	Necsulea_blastnHuman.CUFF.277653	lncRNA	NA	NA	NA	NA
	XLOC_000900	1	132880272	132940005	+	protein_coding	NA	FALSE	none	3472	0	NA	protein_coding	11.914	2.32068	2.66397	1.03142	10.4064	8.46145	5.59255	8.9347	3.80821	10.6233	no	mRNA	NA	NA	NA	NA	ENSMUSG00000026443	protein_coding	NA	NA	NA	NA
	XLOC_000901	1	132972717	132973794	+	lncRNA	NA	TRUE	none	292	140	NA	lncRNA	0	0	0	0	0	0	0	0	0	0	no	NA	NA	NA	NA	NA	Necsulea_Locus_80368	lncRNA	NA	NA	NA	NA
	XLOC_000902	1	133045666	133109700	+	protein_coding	NA	FALSE	protein_coding	9285	1581	0.167861	protein_coding	152.133	395.676	178.486	95.922	185.234	164.998	245.14	384.192	374.157	421.068	yes	mRNA	17	379	14	60	ENSMUSG00000026447	protein_coding	30.4572	-0.26933	54.5378	-0.390399
	XLOC_000903	1	133131142	133139783	+	protein_coding	NA	FALSE	protein_coding	5594	755	0.514767	protein_coding	3015.16	2531.86	2384.25	2115.44	1839.85	1962	2040.35	2216.8	2157.35	2159.42	yes	mRNA	47	1150	31	552	ENSMUSG00000046062	protein_coding	64.1179	-0.0256008	104.498	-0.0617628
	XLOC_000904	1	133163959	133303503	+	protein_coding	NA	FALSE	protein_coding	9145	156	NA	protein_coding	72.4005	116.034	96.7909	51.571	86.373	127.979	276.831	467.583	339.883	423	no	mRNA	NA	NA	NA	NA	ENSMUSG00000041757	protein_coding	NA	NA	14.3806	0.0140904
	XLOC_000905	1	133183297	133184207	+	NA	protein_coding	TRUE	none	910	0	NA	lncRNA	0	0	0	0	1.04064	0	9.32091	5.95647	8.56847	4.82876	no	NA	NA	NA	NA	NA	NA	NA	NA	NA	NA	NA
	XLOC_000906	1	133192261	133193252	+	NA	protein_coding	TRUE	none	991	68	NA	lncRNA	0	0	0	0	1.04064	0	1.86418	5.95647	3.80821	1.9315	no	NA	NA	NA	NA	NA	NA	NA	NA	NA	NA	NA
	XLOC_000907	1	133200152	133200959	+	NA	protein_coding	TRUE	none	807	0	NA	lncRNA	0	0	0	0	0	0	2.79627	7.94196	2.85616	0	no	NA	NA	NA	NA	NA	NA	NA	NA	NA	NA	NA
	XLOC_000908	1	133219753	133220925	+	NA	protein_coding	TRUE	none	1172	0	NA	lncRNA	0	5.8017	0	4.12568	7.28447	1.05768	2.79627	4.96372	4.76026	7.72602	no	NA	NA	NA	NA	NA	NA	NA	NA	NA	NA	NA
	XLOC_000909	1	133227157	133227842	+	NA	protein_coding	TRUE	none	685	0	NA	lncRNA	0	2.32068	0	0	0	2.11536	0	9.92745	0.952052	0.965752	no	NA	NA	NA	NA	NA	NA	NA	NA	NA	NA	NA
	XLOC_000910	1	133229585	133230358	+	NA	protein_coding	TRUE	none	773	4	NA	lncRNA	0.916462	0	0	0	1.04064	0	0.932091	5.95647	2.85616	2.89726	no	NA	NA	NA	NA	NA	NA	NA	NA	NA	NA	NA
	XLOC_000911	1	133309799	133329901	+	protein_coding;nonsense_mediated_decay	NA	FALSE	none	2671	394	NA	protein_coding	32.0762	11.6034	3.55196	1.03142	2.08128	0	20.506	12.9057	15.2328	7.72602	no	NA	NA	NA	NA	NA	NA	NA	NA	NA	NA	NA
	XLOC_000912	1	133337832	133360325	+	protein_coding	NA	FALSE	protein_coding	1700	132	NA	protein_coding	20.1622	2.32068	0	3.09426	0	0	0	0.992745	0.952052	1.9315	no	NA	NA	NA	NA	NA	ENSMUSG00000070645	protein_coding	NA	NA	NA	NA
	XLOC_000913	1	133340794	133341440	+	NA	protein_coding	TRUE	none	646	239	NA	lncRNA	6.41523	3.48102	2.66397	1.03142	1.04064	0	0.932091	0	0	0	no	NA	NA	NA	NA	NA	NA	NA	NA	NA	NA	NA
	XLOC_000914	1	133363571	133380336	+	protein_coding	NA	FALSE	protein_coding	2541	0	NA	protein_coding	31.1597	41.7722	77.2551	28.8798	36.4223	81.4414	63.3822	31.7678	39.9862	40.5616	no	mRNA	NA	NA	NA	NA	ENSMUSG00000070644	protein_coding	NA	NA	NA	NA
	XLOC_000915	1	133425404	133426587	+	NA	NA	FALSE	none	1183	382	NA	lncRNA	0	0	0.88799	0	2.08128	1.05768	2.79627	6.94921	7.61642	1.9315	no	NA	NA	NA	NA	NA	NA	NA	NA	NA	NA	NA
	XLOC_000916	1	133492856	133494939	+	NA	NA	TRUE	lincRNA	2083	401	NA	lncRNA	2.74938	2.32068	1.77598	6.18852	3.12191	1.05768	1.86418	8.9347	30.4657	15.452	no	lncRNA	NA	NA	NA	NA	NA	NA	NA	NA	NA	NA
	XLOC_000917	1	133601222	133601355	+	snoRNA	NA	FALSE	none	133	0	NA	lncRNA	0	0	0	0	0	0	0	0	0	0	no	NA	NA	NA	NA	NA	ENSMUSG00000064814	snoRNA	NA	NA	NA	NA
	XLOC_000918	1	133610410	133614422	+	lncRNA	NA	FALSE	none	746	141	NA	lncRNA	1.83292	0	3.55196	2.06284	1.04064	2.11536	0	0.992745	0.952052	0	no	NA	NA	NA	NA	NA	Ensembl_ENSMUSG00000097014|Necsulea_ENSMUSG00000092104	Overlap	NA	NA	NA	NA
	XLOC_000919	1	133664410	133677178	+	lncRNA	NA	FALSE	none	2786	1813	NA	lncRNA	44.9066	11.6034	20.4238	11.3456	10.4064	4.23072	2.79627	1.98549	0	0	no	NA	NA	NA	NA	NA	Guttman_lincRNA_302	Overlap	NA	NA	NA	NA
	XLOC_000920	1	133693918	133695283	+	NA	NA	FALSE	none	1365	113	NA	lncRNA	7.33169	9.28271	0	2.06284	0	3.17304	0.932091	0.992745	2.85616	0.965752	no	NA	NA	NA	NA	NA	NA	NA	NA	NA	NA	NA
	XLOC_000921	1	133890196	133891133	+	NA	NA	TRUE	none	937	28	NA	lncRNA	10.0811	5.8017	0	1.03142	0	0	0	0	0	0	no	NA	NA	NA	NA	NA	NA	NA	NA	NA	NA	NA
	XLOC_000922	1	133977415	133982330	+	lncRNA	NA	TRUE	none	2453	553	NA	lncRNA	0	0	0	0	0	0	0	0	0	0	no	NA	NA	NA	NA	NA	Necsulea_Locus_80773	lncRNA	NA	NA	NA	NA
	XLOC_000923	1	134037253	134048277	+	protein_coding	NA	FALSE	none	3306	52	NA	protein_coding	0	0	0	0	0	1.05768	0	0	0	0	no	NA	NA	NA	NA	NA	ENSMUSG00000041559	protein_coding	NA	NA	NA	NA
	XLOC_000924	1	134063627	134064253	+	NA	NA	TRUE	none	626	0	NA	lncRNA	0.916462	0	0	0	2.08128	6.34609	2.79627	3.97098	7.61642	7.72602	no	NA	NA	NA	NA	NA	NA	NA	NA	NA	NA	NA
	XLOC_000925	1	134093189	134096102	+	NA	NA	TRUE	lincRNA	2913	158	NA	lncRNA	0.916462	5.8017	0	4.12568	10.4064	24.3267	38.2157	40.7025	41.8903	27.0411	no	NA	NA	NA	NA	NA	NA	NA	NA	NA	NA	NA
	XLOC_000926	1	134109367	134109799	+	processed_pseudogene	NA	FALSE	none	432	0	0.546047	protein_coding	0	0	0	0	0	0	0	0	0	0.965752	no	NA	NA	NA	NA	NA	ENSMUSG00000073559	processed_pseudogene	NA	NA	NA	NA
	XLOC_000927	1	134111241	134151540	+	protein_coding	NA	FALSE	protein_coding	1815	121	NA	protein_coding	41.2408	33.6498	0.88799	0	0	3.17304	10.253	0.992745	2.85616	4.82876	no	NA	NA	NA	NA	NA	ENSMUSG00000026450	protein_coding	NA	NA	NA	NA
	XLOC_000928	1	134182175	134190181	+	protein_coding	NA	FALSE	protein_coding	2198	0	NA	protein_coding	28.4103	20.8861	3.55196	6.18852	8.3251	2.11536	28.8948	5.95647	7.61642	4.82876	no	mRNA	NA	NA	NA	NA	ENSMUSG00000064246	protein_coding	NA	NA	NA	NA
	XLOC_000929	1	134193447	134201231	+	protein_coding	NA	FALSE	none	1828	0	NA	protein_coding	0.916462	5.8017	0	1.03142	0	0	3.72837	1.98549	3.80821	0.965752	no	NA	NA	NA	NA	NA	ENSMUSG00000042451	protein_coding	NA	NA	NA	NA
	XLOC_000930	1	134290003	134292547	+	protein_coding	NA	FALSE	none	1479	0	NA	protein_coding	0	2.32068	6.21593	0	1.04064	0	0	0	0.952052	0	no	NA	NA	NA	NA	NA	ENSMUSG00000026459	protein_coding	NA	NA	NA	NA
	XLOC_000931	1	134362100	134363351	+	NA	NA	FALSE	none	1251	388	NA	lncRNA	3.66585	8.12237	2.66397	8.25136	5.20319	9.51913	10.253	11.9129	17.1369	11.589	no	lncRNA	NA	NA	NA	NA	NA	NA	NA	NA	NA	NA
	XLOC_000932	1	134385939	134390981	+	protein_coding	NA	FALSE	none	1768	0	NA	protein_coding	0.916462	0	0.88799	0	0	0	0	0	0	0	no	NA	NA	NA	NA	NA	ENSMUSG00000050526	protein_coding	NA	NA	NA	NA
	XLOC_000933	1	134405780	134411818	+	nonsense_mediated_decay;protein_coding	NA	FALSE	none	2867	46	1.85509	protein_coding	260.275	319.093	396.043	471.359	657.683	435.765	195.739	157.846	191.363	156.452	no	NA	NA	NA	NA	NA	ENSMUSG00000026456	nonsense_mediated_decay,protein_coding	58.8426	0.0713743	55.8691	0.258624
	XLOC_000934	1	134414175	134433351	+	protein_coding	NA	FALSE	protein_coding	3572	735	0.147741	protein_coding	1678.04	1596.63	2178.24	2129.88	1632.76	2377.67	1496.01	1081.1	1409.99	1229.4	yes	mRNA	42	366	0	319	ENSMUSG00000026457	protein_coding	135.977	-0.03189	195.451	0.108864
	XLOC_000935	1	134439672	134441989	+	NA	NA	TRUE	lincRNA	2317	815	NA	lncRNA	10.9975	9.28271	6.21593	6.18852	21.8534	15.8652	0.932091	5.95647	5.71231	7.72602	no	lncRNA	NA	NA	NA	NA	NA	NA	NA	NA	NA	NA
	XLOC_000936	1	134444338	134445072	+	NA	NA	TRUE	none	734	187	NA	lncRNA	1.83292	0	1.77598	2.06284	7.28447	1.05768	1.86418	0.992745	0	2.89726	no	NA	NA	NA	NA	NA	NA	NA	NA	NA	NA	NA
	XLOC_000937	1	134455530	134491018	+	protein_coding	NA	FALSE	protein_coding	3446	53	0.434705	protein_coding	955.869	894.621	998.1	849.89	612.936	640.955	545.273	468.576	469.362	478.047	yes	mRNA	19	336	15	129	ENSMUSG00000026455	protein_coding	36.2707	-0.0174485	46.5035	0.0377012
	XLOC_000938	1	134494659	134507886	+	protein_coding	snoRNA	FALSE	none	2036	634	0.762298	lncRNA	1033.77	733.334	463.531	415.662	214.371	266.536	240.48	214.433	216.116	223.089	no	NA	NA	NA	NA	NA	ENSMUSG00000042229	protein_coding	99.0686	0.25008	57.8621	0.160175
	XLOC_000939	1	134505337	134505463	+	snoRNA	protein_coding	FALSE	none	126	0	NA	lncRNA	3.66585	1.16034	0.88799	1.03142	2.08128	2.11536	0.932091	0	0	0.965752	no	NA	NA	NA	NA	NA	ENSMUSG00000077202	snoRNA	NA	NA	NA	NA
	XLOC_000940	1	134518080	134518563	+	processed_pseudogene	NA	FALSE	none	483	42	1.82911	protein_coding	0	0	0	1.03142	0	0	0.932091	0.992745	0	0.965752	no	NA	NA	NA	NA	NA	ENSMUSG00000096712	processed_pseudogene	NA	NA	NA	NA
	XLOC_000941	1	134530365	134531091	+	NA	NA	TRUE	none	726	70	NA	lncRNA	6.41523	1.16034	0.88799	2.06284	2.08128	2.11536	0.932091	0	0	0.965752	no	NA	NA	NA	NA	NA	NA	NA	NA	NA	NA	NA
	XLOC_000942	1	134555597	134636742	+	protein_coding	NA	FALSE	protein_coding	11796	931	0.959517	protein_coding	7405.01	8586.51	11765.9	8656.71	7940.07	8617.98	4113.32	4380.98	4071.93	4577.67	yes	mRNA	104	1499	42	457	ENSMUSG00000042207	protein_coding	878.904	-0.105343	558.545	-0.00556702
	XLOC_000943	1	134636799	134642336	+	lncRNA	NA	FALSE	none	5537	1123	NA	lncRNA	27.4938	32.4895	39.0715	33.0054	91.5762	76.153	66.1785	97.289	50.4588	72.4314	no	lncRNA	NA	NA	NA	NA	Ensembl_ENSMUSG00000097435|Necsulea_ENSMUSG00000091246	lncRNA	NA	NA	NA	NA
	XLOC_000944	1	134644491	134646141	+	lncRNA	NA	TRUE	lincRNA	1650	340	NA	lncRNA	4.58231	2.32068	2.66397	0	1.04064	3.17304	10.253	8.9347	1.9041	6.76027	no	NA	NA	NA	NA	NA	Ensembl_ENSMUSG00000097435|Necsulea_ENSMUSG00000091246	lncRNA	NA	NA	NA	NA
	XLOC_000945	1	134709299	134753149	+	protein_coding	NA	FALSE	protein_coding	6888	441	NA	protein_coding	0.916462	5.8017	14.2078	4.12568	11.447	2.11536	5.59255	21.8404	50.4588	48.2876	no	mRNA	NA	NA	NA	NA	ENSMUSG00000026452	protein_coding	NA	NA	NA	NA
	XLOC_000946	1	134809274	134809368	+	miRNA	NA	FALSE	none	94	77	NA	lncRNA	0	0	0	0	0	0	0	0	0	0	no	NA	NA	NA	NA	NA	ENSMUSG00000077846	miRNA	NA	NA	NA	NA
	XLOC_000947	1	134962551	134974162	+	protein_coding	NA	FALSE	protein_coding	1129	0	1.43628	protein_coding	445.4	408.439	354.308	275.389	341.329	229.517	218.109	162.81	219.924	165.144	yes	mRNA	16	67	32	95	ENSMUSG00000026429	protein_coding	74.5905	-0.0299694	93.7701	0.0608841
	XLOC_000948	1	135108960	135145320	+	lncRNA;protein_coding	NA	FALSE	none	4299	601	0.585786	protein_coding	20.1622	30.1688	31.0796	11.3456	8.3251	4.23072	4.66046	2.97823	0.952052	2.89726	no	NA	NA	NA	NA	NA	NA	NA	NA	NA	NA	NA
	XLOC_000949	1	135146737	135156341	+	protein_coding	NA	FALSE	protein_coding	1930	99	1.45375	protein_coding	168.629	200.739	158.062	146.462	247.672	169.229	142.61	152.883	181.842	199.911	yes	mRNA	16	227	37	202	ENSMUSG00000026426	protein_coding	NA	NA	53.9581	-0.106249
	XLOC_000950	1	135232044	135233406	+	protein_coding	NA	FALSE	protein_coding	1362	129	3.42919	protein_coding	596.616	532.596	624.257	622.978	568.188	671.627	510.786	705.842	640.731	524.404	no	mRNA	NA	NA	NA	NA	ENSMUSG00000079139	protein_coding	707.973	-0.0172028	767.963	-0.168942
	XLOC_000951	1	135313882	135314836	+	NA	NA	FALSE	none	954	234	NA	lncRNA	3.66585	2.32068	0.88799	2.06284	1.04064	2.11536	3.72837	4.96372	4.76026	9.65752	no	NA	NA	NA	NA	NA	NA	NA	NA	NA	NA	NA
	XLOC_000952	1	135324806	135368065	+	protein_coding	NA	FALSE	protein_coding	3948	216	NA	protein_coding	3.66585	3.48102	4.43995	12.377	13.5283	10.5768	26.0986	8.9347	18.089	11.589	no	mRNA	NA	NA	NA	NA	ENSMUSG00000048096	protein_coding	NA	NA	NA	NA
	XLOC_000953	1	135584772	135599950	+	protein_coding	NA	FALSE	none	2618	613	NA	protein_coding	1.83292	0	0	1.03142	0	0	0	0	0.952052	0.965752	no	NA	NA	NA	NA	NA	ENSMUSG00000054412	protein_coding	NA	NA	NA	NA
	XLOC_000954	1	135720060	135752232	+	protein_coding	NA	FALSE	protein_coding	1956	36	1	protein_coding	1032.85	975.845	382.723	750.874	540.091	764.703	596.538	522.184	446.513	582.349	yes	mRNA	11	219	12	161	ENSMUSG00000026421	protein_coding	NA	NA	NA	NA
	XLOC_000955	1	135766118	135769136	+	protein_coding	NA	FALSE	protein_coding	1435	0	0.761433	lncRNA	577.371	756.541	425.347	609.569	207.087	227.401	281.492	190.607	250.39	242.404	yes	mRNA	10	268	60	517	ENSMUSG00000041801	protein_coding	NA	NA	NA	NA
	XLOC_000956	1	135783064	135810989	+	protein_coding	NA	FALSE	protein_coding	1765	13	NA	protein_coding	105.393	37.1309	7.10392	1.03142	5.20319	3.17304	8.38882	12.9057	17.1369	52.1506	no	mRNA	NA	NA	NA	NA	ENSMUSG00000026418	protein_coding	NA	NA	NA	NA
	XLOC_000957	1	135818597	135833341	+	protein_coding	NA	FALSE	protein_coding	2992	247	NA	protein_coding	200.705	153.165	217.557	322.834	306.988	234.805	131.425	116.151	119.959	110.096	yes	mRNA	4	129	6	47	ENSMUSG00000041782	protein_coding	13.1728	0.004199	17.1503	0.195324
	XLOC_000958	1	135836385	135852260	+	protein_coding	NA	FALSE	protein_coding	1227	165	NA	protein_coding	12.8305	12.7637	1.77598	2.06284	1.04064	0	2.79627	3.97098	0.952052	3.86301	no	mRNA	NA	NA	NA	NA	ENSMUSG00000026414	protein_coding	NA	NA	NA	NA
	XLOC_000959	1	136008218	136035030	+	protein_coding	NA	FALSE	protein_coding	1877	129	1.4981	protein_coding	336.341	359.705	176.71	222.787	240.387	373.361	478.163	413.975	560.759	586.212	yes	mRNA	6	78	15	105	ENSMUSG00000026411	protein_coding	11.6426	-0.12305	175.66	-0.386415
	XLOC_000960	1	136038208	136039121	+	NA	NA	FALSE	none	913	238	NA	lncRNA	0	0	0	1.03142	7.28447	1.05768	0.932091	5.95647	1.9041	4.82876	no	NA	NA	NA	NA	NA	NA	NA	NA	NA	NA	NA
	XLOC_000961	1	136050803	136051370	+	protein_coding	NA	FALSE	none	567	0	NA	protein_coding	0	0	0.88799	0	1.04064	3.17304	0.932091	0.992745	0.952052	0	no	NA	NA	NA	NA	NA	ENSMUSG00000097918	protein_coding	NA	NA	NA	NA
	XLOC_000962	1	136052749	136119822	+	protein_coding	NA	FALSE	none	6411	143	NA	protein_coding	0.916462	5.8017	11.5439	10.3142	19.7721	7.40377	15.8456	0	4.76026	0.965752	no	mRNA	NA	NA	NA	NA	ENSMUSG00000026407	protein_coding	NA	NA	NA	NA
	XLOC_000963	1	136131384	136178022	+	nonsense_mediated_decay;protein_coding	NA	FALSE	none	9383	125	NA	protein_coding	264.857	763.503	206.902	283.64	571.31	450.572	681.359	868.652	895.881	925.191	no	NA	NA	NA	NA	NA	ENSMUSG00000041642	nonsense_mediated_decay,protein_coding	NA	NA	35.0237	0.017505
	XLOC_000964	1	136251268	136255066	+	lncRNA	NA	FALSE	none	563	342	NA	lncRNA	0	0	0	0	0	0	0	0	0	0	no	NA	NA	NA	NA	NA	Necsulea_CUFF.135632	Overlap	NA	NA	NA	NA
	XLOC_000965	1	136415270	136440216	+	protein_coding	NA	FALSE	protein_coding	2224	72	1.05591	protein_coding	408.742	331.857	367.628	334.18	223.737	211.536	244.208	206.491	191.363	233.712	yes	mRNA	3	165	56	209	ENSMUSG00000026404	protein_coding	18.5197	0.0659996	12.1316	-0.355688
	XLOC_000966	1	136466343	136531614	+	protein_coding	NA	FALSE	protein_coding	9367	969	1.5956	protein_coding	940.29	999.052	1001.65	864.33	917.843	649.416	599.335	675.067	555.047	432.657	yes	mRNA	32	1132	16	134	ENSMUSG00000041498	protein_coding	50.3985	-0.0891312	67.4441	-0.0395755
	XLOC_000967	1	136556727	136557161	+	NA	NA	TRUE	none	434	175	0.204537	lncRNA	18.3292	19.7258	7.99191	6.18852	5.20319	9.51913	0	0.992745	2.85616	0.965752	no	NA	NA	NA	NA	NA	NA	NA	NA	NA	NA	NA
	XLOC_000968	1	136566651	136639403	+	protein_coding;lncRNA	lncRNA	FALSE	none	14955	2831	0.228404	protein_coding	1715.62	1743.99	3033.37	2569.27	2113.54	1690.17	1169.77	1161.51	1188.16	1178.22	no	NA	NA	NA	NA	NA	NA	NA	NA	NA	NA	NA
	XLOC_000969	1	136570582	136576659	+	lncRNA	protein_coding;lncRNA	TRUE	none	714	0	NA	lncRNA	5.49877	11.6034	3.55196	4.12568	8.3251	3.17304	0	1.98549	0	0	no	NA	NA	NA	NA	NA	Guttman_lincRNA_304|Necsulea_CUFF.135679|Necsulea_Locus_82434|Ensembl_ENSMUSG00000097229	Overlap	NA	NA	NA	NA
	XLOC_000970	1	136580203	136585524	+	lncRNA	protein_coding;lncRNA	TRUE	none	4896	1607	0.0553742	lncRNA	25.6609	39.4515	56.8313	33.0054	67.6415	25.3843	10.253	10.9202	16.1849	7.72602	no	NA	NA	NA	NA	NA	Guttman_lincRNA_304|Necsulea_CUFF.135679|Necsulea_Locus_82434|Ensembl_ENSMUSG00000097229	Overlap	NA	NA	NA	NA
	XLOC_000971	1	136644288	136645488	+	NA	NA	TRUE	lincRNA	1200	127	NA	lncRNA	0	4.64136	0.88799	1.03142	5.20319	0	0.932091	7.94196	8.56847	5.79451	no	NA	NA	NA	NA	NA	NA	NA	NA	NA	NA	NA
	XLOC_000972	1	136669635	136690804	+	lncRNA	NA	TRUE	none	7718	3274	0.0738911	lncRNA	61.4029	52.2153	116.327	124.802	96.7793	58.1725	23.3023	19.8549	32.3698	18.3493	no	NA	NA	NA	NA	NA	Necsulea_Locus_81385|Guttman_lincRNA_305|Ensembl_ENSMUSG00000097113	lncRNA	21.0025	-0.40822	NA	NA
	XLOC_000973	1	136695148	136731763	+	snRNA	snRNA;NA	FALSE	none	18564	8011	0.156453	lncRNA	47.656	64.979	310.796	346.557	1629.64	361.727	46.6046	55.5937	19.9931	8.69177	no	NA	NA	NA	NA	NA	ENSMUSG00000092912	snRNA	NA	NA	NA	NA
	XLOC_000974	1	136697373	136697471	+	snRNA	snRNA	FALSE	none	98	94	NA	lncRNA	0	0	5.32794	2.06284	19.7721	6.34609	0	0.992745	0	0	no	NA	NA	NA	NA	NA	ENSMUSG00000092912	snRNA	NA	NA	NA	NA
	XLOC_000975	1	136700936	136702226	+	NA	snRNA	FALSE	none	1290	528	NA	lncRNA	0.916462	0	10.6559	7.21994	42.6662	8.46145	0.932091	2.97823	0.952052	0.965752	no	NA	NA	NA	NA	NA	NA	NA	NA	NA	NA	NA
	XLOC_000976	1	136713430	136721656	+	NA	snRNA	TRUE	none	8226	2562	0.109508	lncRNA	16.4963	45.2532	135.862	148.524	835.632	198.844	15.8456	21.8404	4.76026	3.86301	no	NA	NA	NA	NA	NA	NA	NA	NA	NA	NA	NA
	XLOC_000977	1	136739565	136743234	+	NA	NA	TRUE	none	3669	1442	NA	lncRNA	0.916462	5.8017	9.76789	18.5656	146.73	31.7304	5.59255	2.97823	0.952052	0	no	NA	NA	NA	NA	NA	NA	NA	NA	NA	NA	NA
	XLOC_000978	1	136743359	136744554	+	NA	NA	TRUE	none	1195	357	NA	lncRNA	0	0	0.88799	0	47.8694	4.23072	1.86418	0	0	0	no	NA	NA	NA	NA	NA	NA	NA	NA	NA	NA	NA
	XLOC_000979	1	136744763	136746090	+	NA	NA	TRUE	none	1327	206	NA	lncRNA	0	0	5.32794	4.12568	20.8128	9.51913	0.932091	1.98549	0.952052	0	no	NA	NA	NA	NA	NA	NA	NA	NA	NA	NA	NA
	XLOC_000980	1	136746205	136746504	+	NA	NA	TRUE	none	299	12	NA	lncRNA	0	0	3.55196	0	2.08128	0	0	0	0	0	no	NA	NA	NA	NA	NA	NA	NA	NA	NA	NA	NA
	XLOC_000981	1	136751537	136752249	+	NA	NA	TRUE	none	712	0	NA	lncRNA	0	0	2.66397	3.09426	27.0566	1.05768	0	0	0	0.965752	no	NA	NA	NA	NA	NA	NA	NA	NA	NA	NA	NA
	XLOC_000982	1	136753813	136754489	+	NA	NA	FALSE	none	676	138	NA	lncRNA	0	1.16034	0.88799	1.03142	23.9347	6.34609	0.932091	0	0	0	no	NA	NA	NA	NA	NA	NA	NA	NA	NA	NA	NA
	XLOC_000983	1	136754870	136755299	+	NA	NA	FALSE	none	429	20	NA	lncRNA	0	0	0	0	7.28447	2.11536	0.932091	0	0	0	no	NA	NA	NA	NA	NA	NA	NA	NA	NA	NA	NA
	XLOC_000984	1	136755970	136757458	+	NA	NA	FALSE	none	1488	448	NA	lncRNA	0	1.16034	1.77598	5.1571	42.6662	11.6345	0	1.98549	1.9041	0.965752	no	NA	NA	NA	NA	NA	NA	NA	NA	NA	NA	NA
	XLOC_000985	1	136757560	136758638	+	miRNA	NA	FALSE	none	1078	930	NA	lncRNA	0	0	1.77598	0	31.2191	5.2884	0	0	0	0	no	NA	NA	NA	NA	NA	ENSMUSG00000096432	miRNA	NA	NA	NA	NA
	XLOC_000986	1	136764643	136764979	+	NA	NA	TRUE	none	336	132	NA	lncRNA	0	1.16034	0.88799	2.06284	15.6096	4.23072	0	0	0	0	no	NA	NA	NA	NA	NA	NA	NA	NA	NA	NA	NA
	XLOC_000987	1	136765085	136767886	+	NA	NA	TRUE	none	2801	792	0.50703	lncRNA	0.916462	2.32068	9.76789	9.28278	105.104	27.4997	5.59255	5.95647	0	0	no	NA	NA	NA	NA	NA	NA	NA	NA	NA	NA	NA
	XLOC_000988	1	136768231	136769043	+	NA	NA	TRUE	none	812	92	NA	lncRNA	0	0	2.66397	1.03142	20.8128	2.11536	0.932091	1.98549	1.9041	0	no	NA	NA	NA	NA	NA	NA	NA	NA	NA	NA	NA
	XLOC_000989	1	136769289	136784239	+	lncRNA	NA	TRUE	none	8630	649	NA	lncRNA	3.66585	10.4431	56.8313	50.5396	321.557	88.8452	9.32091	8.9347	5.71231	7.72602	no	NA	NA	NA	NA	NA	Necsulea_blastnOpossum.Locus_190765	lncRNA	NA	NA	NA	NA
	XLOC_000990	1	136785874	136786864	+	NA	NA	TRUE	none	990	2	NA	lncRNA	0	0	2.66397	3.09426	28.0972	2.11536	0.932091	0	0	0.965752	no	NA	NA	NA	NA	NA	NA	NA	NA	NA	NA	NA
	XLOC_000991	1	136787579	136788807	+	NA	NA	TRUE	none	1228	146	NA	lncRNA	0	0	0	1.03142	14.5689	6.34609	0.932091	0.992745	0	0	no	NA	NA	NA	NA	NA	NA	NA	NA	NA	NA	NA
	XLOC_000992	1	136789524	136790097	+	NA	NA	TRUE	none	573	122	NA	lncRNA	0	0	0	4.12568	13.5283	2.11536	0	0.992745	0	0	no	NA	NA	NA	NA	NA	NA	NA	NA	NA	NA	NA
	XLOC_000993	1	137353563	137356307	+	lncRNA	NA	TRUE	none	287	0	NA	lncRNA	0	0	0	0	1.04064	0	0.932091	0	0	0	no	NA	NA	NA	NA	NA	Necsulea_Locus_81129	lncRNA	NA	NA	NA	NA
	XLOC_000994	1	137445435	137472027	+	lncRNA	lncRNA	TRUE	none	471	75	NA	lncRNA	0	0	0	0	0	0	0	0	0	0	no	NA	NA	NA	NA	NA	Necsulea_Locus_80587|Necsulea_Locus_80810	lncRNA	NA	NA	NA	NA
	XLOC_000995	1	137465896	137466781	+	lncRNA	lncRNA	TRUE	none	537	0	NA	lncRNA	0	0	0	0	0	0	0	0	0	0	no	NA	NA	NA	NA	NA	Necsulea_Locus_80587|Necsulea_Locus_80810	lncRNA	NA	NA	NA	NA
	XLOC_000996	1	137734317	137734433	+	snoRNA	NA	FALSE	none	116	0	NA	lncRNA	0	0	0	0	0	0	0	0	0	0	no	NA	NA	NA	NA	NA	ENSMUSG00000088715	snoRNA	NA	NA	NA	NA
	XLOC_000997	1	137898594	137966541	+	protein_coding;lncRNA;miRNA;lncRNA	NA	FALSE	none	50653	4529	0.429955	lncRNA	0	0	3.55196	22.6912	53.0725	47.5956	244.208	494.387	875.888	1655.3	no	NA	NA	NA	NA	NA	NA	NA	NA	NA	NA	NA
	XLOC_000998	1	137899570	137916080	+	NA	protein_coding;lncRNA;miRNA	TRUE	none	16510	1323	NA	lncRNA	0	1.16034	8.8799	10.3142	33.3004	35.9612	90.4129	184.651	401.766	563.034	no	NA	NA	NA	NA	NA	NA	NA	NA	NA	NA	NA
	XLOC_000999	1	137966638	137968320	+	miRNA	NA	FALSE	none	1682	119	NA	lncRNA	0	0	0	0	0	1.05768	0	5.95647	5.71231	16.4178	no	NA	NA	NA	NA	NA	ENSMUSG00000065458	miRNA	NA	NA	NA	NA
	XLOC_001000	1	137973713	137974821	+	NA	NA	TRUE	lincRNA	1108	153	NA	lncRNA	0	0	0	0	0	0	0	2.97823	0.952052	7.72602	no	NA	NA	NA	NA	NA	NA	NA	NA	NA	NA	NA
	XLOC_001001	1	138273737	138289460	+	protein_coding	NA	FALSE	none	1885	157	NA	lncRNA	0	0	0.88799	0	0	0	0	0	0	0	no	NA	NA	NA	NA	NA	ENSMUSG00000026394	protein_coding	NA	NA	NA	NA
	XLOC_001002	1	138720783	138720882	+	lncRNA	NA	TRUE	none	99	0	NA	lncRNA	0	0	0	0	0	0	0	0	0	0	no	NA	NA	NA	NA	NA	Necsulea_blastnOpossum.Locus_190945	TooShort	NA	NA	NA	NA
	XLOC_001003	1	138963348	139176209	+	nonsense_mediated_decay;protein_coding	NA	FALSE	none	10179	697	0.20922	protein_coding	650.688	887.659	570.977	697.24	800.251	664.224	740.081	665.139	638.827	592.006	no	NA	NA	NA	NA	NA	ENSMUSG00000056268	nonsense_mediated_decay,protein_coding	75.8726	0.178107	151.401	0.216212
	XLOC_001004	1	139422216	139453197	+	protein_coding	NA	FALSE	protein_coding	8662	261	0.16488	protein_coding	395.911	456.013	396.043	526.024	494.303	511.918	555.526	592.669	726.416	874.972	yes	mRNA	11	407	32	258	ENSMUSG00000033964	protein_coding	14.9018	0.182333	59.9503	0.232998
	XLOC_001005	1	139454774	139494090	+	protein_coding	NA	FALSE	protein_coding	9866	208	0.470759	protein_coding	1683.54	2310.24	2407.34	2192.8	2262.35	2351.22	2601.47	2853.15	2740.96	2612.36	yes	mRNA	14	858	29	231	ENSMUSG00000033952	protein_coding.neuron.differentiation	100.732	0.0453399	194.105	0.286117
	XLOC_001006	1	139501706	139523756	+	protein_coding	NA	FALSE	none	2378	28	NA	protein_coding	0.916462	1.16034	0	0	1.04064	0	2.79627	0	0	1.9315	no	NA	NA	NA	NA	NA	ENSMUSG00000026368	protein_coding	NA	NA	NA	NA
	XLOC_001007	1	139671603	139671707	+	snRNA	NA	FALSE	none	104	102	NA	lncRNA	0	0	0	0	0	0	0	0	0	0	no	NA	NA	NA	NA	NA	ENSMUSG00000096117	snRNA	NA	NA	NA	NA
	XLOC_001008	1	139786982	139787086	+	snRNA	NA	FALSE	none	104	102	NA	lncRNA	0	0	0	0	0	0	0	0	0	0	no	NA	NA	NA	NA	NA	ENSMUSG00000095393	snRNA	NA	NA	NA	NA
	XLOC_001009	1	140003824	140003966	+	snoRNA	NA	FALSE	none	142	45	0.530818	lncRNA	0	0	0	1.03142	0	0	0	0	0	0	no	NA	NA	NA	NA	NA	ENSMUSG00000087930	snoRNA	NA	NA	NA	NA
	XLOC_001010	1	140225065	140612063	+	protein_coding	NA	FALSE	protein_coding	6995	100	NA	protein_coding	41.2408	78.9031	31.0796	46.4139	147.771	80.3838	54.9934	66.5139	52.3629	42.4931	yes	mRNA	4	111	24	49	ENSMUSG00000052726	protein_coding	NA	NA	14.6799	0.299549
	XLOC_001011	1	141178053	141181194	+	lncRNA	NA	TRUE	none	713	647	NA	lncRNA	0	0	0	0	0	0	0	0	0	0	no	NA	NA	NA	NA	NA	Necsulea_Locus_81267	lncRNA	NA	NA	NA	NA
	XLOC_001012	1	141298099	141298206	+	snRNA	NA	FALSE	none	107	107	NA	lncRNA	0	0	0	0	0	0	0	0	0	0	no	NA	NA	NA	NA	NA	ENSMUSG00000093879	snRNA	NA	NA	NA	NA
	XLOC_001013	1	141314354	141314468	+	lncRNA	NA	TRUE	none	114	114	NA	lncRNA	0	0	0	0	0	0	0	0	0	0	no	NA	NA	NA	NA	NA	Ensembl_ENSMUSG00000089418	TooShort	NA	NA	NA	NA
	XLOC_001014	1	142914123	142918079	+	lncRNA	NA	TRUE	none	75	0	NA	lncRNA	0	0	0	0	0	0	0	0	0	0	no	NA	NA	NA	NA	NA	Guttman_lincRNA_393	TooShort	NA	NA	NA	NA
	XLOC_001015	1	142949296	142978660	+	lncRNA	NA	TRUE	none	286	85	NA	lncRNA	0	0	0	0	0	0	0	0	0	0	no	NA	NA	NA	NA	NA	Necsulea_CUFF.135994|Necsulea_blastnHuman.ENSG00000226640	lncRNA	NA	NA	NA	NA
	XLOC_001016	1	143640663	143650406	+	protein_coding	NA	FALSE	none	5080	124	NA	protein_coding	0	0	0.88799	0	2.08128	0	0.932091	0	2.85616	14.4863	no	NA	NA	NA	NA	NA	ENSMUSG00000033849	protein_coding	NA	NA	17.4207	0.562708
	XLOC_001017	1	143683229	143684298	+	processed_pseudogene	NA	FALSE	none	1069	208	15.6901	protein_coding	0	0	0	0	0	0	0	0	0	0	no	NA	NA	NA	NA	NA	ENSMUSG00000089640	processed_pseudogene	NA	NA	NA	NA
	XLOC_001018	1	143739028	143749676	+	protein_coding	NA	FALSE	protein_coding	4507	1460	1.03149	protein_coding	155.798	109.072	184.702	198.033	113.43	106.826	69.9069	102.253	101.87	89.815	yes	mRNA	9	61	43	79	ENSMUSG00000018196	protein_coding	42.6107	-0.069156	24.2576	-0.536374
	XLOC_001019	1	143777214	143807657	+	protein_coding	snoRNA	FALSE	none	2221	131	1.92158	protein_coding	582.87	459.494	826.718	764.282	601.489	677.973	435.287	501.336	326.554	333.185	no	NA	NA	NA	NA	NA	ENSMUSG00000018189	protein_coding	265.506	-0.0272993	150.973	-0.1171
	XLOC_001020	1	143778927	143779062	+	snoRNA	protein_coding	FALSE	none	135	0	0.0466634	lncRNA	2.74938	1.16034	8.8799	2.06284	10.4064	5.2884	2.79627	16.8767	7.61642	6.76027	no	NA	NA	NA	NA	NA	ENSMUSG00000088323	snoRNA	NA	NA	NA	NA
	XLOC_001021	1	143813482	143816367	+	NA	NA	TRUE	lincRNA	2885	1331	NA	lncRNA	7.33169	10.4431	6.21593	10.3142	36.4223	19.0383	12.1172	24.8186	7.61642	7.72602	no	lncRNA	NA	NA	NA	NA	NA	NA	NA	NA	NA	NA
	XLOC_001022	1	143817376	143817977	+	NA	NA	TRUE	none	601	570	NA	lncRNA	3.66585	2.32068	7.10392	1.03142	1.04064	5.2884	3.72837	3.97098	0	0	no	NA	NA	NA	NA	NA	NA	NA	NA	NA	NA	NA
	XLOC_001023	1	143818056	143819173	+	NA	NA	TRUE	lincRNA	1117	48	NA	lncRNA	0	2.32068	1.77598	3.09426	3.12191	4.23072	4.66046	6.94921	1.9041	1.9315	no	lncRNA	NA	NA	NA	NA	NA	NA	NA	NA	NA	NA
	XLOC_001024	1	144077859	144080701	+	lncRNA	NA	TRUE	none	238	73	NA	lncRNA	0	0	0	0	0	0	0	0	0	0	no	NA	NA	NA	NA	NA	Necsulea_Locus_80414	lncRNA	NA	NA	NA	NA
	XLOC_001025	1	144824669	144916459	+	lncRNA	NA	TRUE	none	253	0	NA	lncRNA	0	0	0	0	0	0	0	0	0	0	no	NA	NA	NA	NA	NA	Necsulea_Locus_81084	lncRNA	NA	NA	NA	NA
	XLOC_001026	1	145183893	145184889	+	processed_pseudogene	NA	FALSE	none	996	0	NA	lncRNA	0	0	0	0	0	0	0	0	0	0	no	NA	NA	NA	NA	NA	ENSMUSG00000097130	processed_pseudogene	NA	NA	NA	NA
	XLOC_001027	1	146420433	146420874	+	protein_coding	NA	FALSE	none	363	0	NA	protein_coding	0	0	0	0	0	0	0	0	0	0	no	NA	NA	NA	NA	NA	ENSMUSG00000090323	protein_coding	NA	NA	NA	NA
	XLOC_001028	1	146495628	146902472	+	nonsense_mediated_decay;protein_coding	processed_pseudogene	FALSE	none	3348	119	NA	protein_coding	0	0	0.88799	1.03142	1.04064	0	0.932091	0	0	2.89726	no	NA	NA	NA	NA	NA	ENSMUSG00000035131	protein_coding.neuron.differentiation	NA	NA	NA	NA
	XLOC_001029	1	146725580	146729090	+	processed_pseudogene	nonsense_mediated_decay;protein_coding	FALSE	none	3510	200	0.435196	protein_coding	0.916462	0	0	0	0	1.05768	0	0	0	0	no	NA	NA	NA	NA	NA	ENSMUSG00000080078	processed_pseudogene	NA	NA	NA	NA
	XLOC_001030	1	147383513	147388502	+	lncRNA	NA	TRUE	none	635	0	NA	lncRNA	0	0	0	0	0	0	0	0	0	0	no	NA	NA	NA	NA	NA	Necsulea_Locus_80584	lncRNA	NA	NA	NA	NA
	XLOC_001031	1	148712749	148732364	+	lncRNA	NA	TRUE	none	217	205	NA	lncRNA	0	0	0	0	0	0	0	0	0	0	no	NA	NA	NA	NA	NA	Necsulea_Locus_81330	lncRNA	NA	NA	NA	NA
	XLOC_001032	1	149841529	149841661	+	rRNA	NA	FALSE	none	132	89	NA	lncRNA	0	0	0	0	0	0	0	0	0	0	no	NA	NA	NA	NA	NA	ENSMUSG00000077516	rRNA	NA	NA	NA	NA
	XLOC_001033	1	150100123	150108010	+	protein_coding	NA	FALSE	none	4143	164	1.57955	protein_coding	2.74938	1.16034	18.6478	19.597	8.3251	9.51913	0	6.94921	0	4.82876	no	mRNA	NA	NA	NA	NA	ENSMUSG00000032487	protein_coding	NA	NA	NA	NA
	XLOC_001034	1	150319416	150333905	+	protein_coding	NA	FALSE	none	1246	0	NA	protein_coding	0	1.16034	0	0	0	0	0	0	0	0	no	NA	NA	NA	NA	NA	ENSMUSG00000006007	protein_coding	NA	NA	NA	NA
	XLOC_001035	1	150392837	150449935	+	protein_coding	NA	FALSE	protein_coding	7773	221	4.71732	protein_coding	5019.46	4651.8	6685.67	6327.76	5943.08	5978.01	4636.22	5631.84	4451.8	4336.23	yes	mRNA	76	3049	40	381	ENSMUSG00000006005	protein_coding	533.629	-0.116997	746.941	-0.19488
	XLOC_001036	1	150471512	150477907	+	lncRNA	NA	TRUE	none	4518	2046	0.429955	lncRNA	0	0	0	0	0	0	1.86418	0	0	0.965752	no	NA	NA	NA	NA	NA	Necsulea_Locus_80246	lncRNA	NA	NA	NA	NA
	XLOC_001037	1	151000145	151001812	+	lncRNA	NA	TRUE	none	285	0	NA	lncRNA	0	0	0	0	0	0	0.932091	0	0	0	no	NA	NA	NA	NA	NA	Necsulea_Locus_80158	lncRNA	NA	NA	NA	NA
	XLOC_001038	1	151136506	151137780	+	processed_pseudogene	NA	FALSE	none	899	5	NA	lncRNA	0	0	0	0	0	0	0	0	0	0	no	NA	NA	NA	NA	NA	ENSMUSG00000097426	processed_pseudogene	NA	NA	NA	NA
	XLOC_001039	1	151344497	151364445	+	protein_coding	NA	FALSE	protein_coding	5037	94	0.373136	protein_coding	1304.12	1938.93	3003.18	2411.46	2257.14	2733.05	5118.11	5285.37	5316.26	5443.95	yes	mRNA	59	683	31	303	ENSMUSG00000023150	protein_coding	203.947	0.14834	899.841	0.0376015
	XLOC_001040	1	151428584	151458208	+	protein_coding	NA	FALSE	protein_coding	2804	215	2.45383	protein_coding	239.196	285.443	320.564	299.112	239.347	281.343	268.442	260.099	253.246	272.342	yes	mRNA	11	235	118	269	ENSMUSG00000053286	protein_coding	12.6169	-0.0143289	23.9671	-0.172377
	XLOC_001041	1	151571111	151722001	+	nonsense_mediated_decay;protein_coding	NA	FALSE	none	7450	150	1.95551	protein_coding	1858.58	1778.8	658.888	431.133	114.47	202.017	132.357	76.4414	148.52	79.1917	no	NA	NA	NA	NA	NA	ENSMUSG00000026483	nonsense_mediated_decay,protein_coding	22.2693	0.0634801	21.4434	0.184541
	XLOC_001042	1	151755151	151822361	+	protein_coding	NA	FALSE	protein_coding	6862	21	0.617226	protein_coding	767.995	873.735	762.783	645.669	741.975	758.357	2609.86	1990.45	1955.52	1397.44	yes	mRNA	3	157	19	63	ENSMUSG00000043019	protein_coding	17.3345	0.252763	121.916	0.444898
	XLOC_001043	1	151879714	151881592	+	NA	NA	FALSE	none	1878	76	NA	lncRNA	9.16462	5.8017	20.4238	13.4085	12.4877	8.46145	0	0	1.9041	1.9315	no	lncRNA	NA	NA	NA	NA	NA	NA	NA	NA	NA	NA
	XLOC_001044	1	152090745	152091848	+	NA	NA	FALSE	none	1103	167	NA	lncRNA	0	0	0	0	0	1.05768	3.72837	2.97823	7.61642	13.5205	no	NA	NA	NA	NA	NA	NA	NA	NA	NA	NA	NA
	XLOC_001045	1	152399829	152510713	+	nonsense_mediated_decay;protein_coding	NA	FALSE	none	4263	50	NA	protein_coding	2.74938	5.8017	6.21593	4.12568	7.28447	2.11536	47.5367	55.5937	52.3629	44.4246	no	NA	NA	NA	NA	NA	ENSMUSG00000032649	nonsense_mediated_decay,protein_coding	NA	NA	NA	NA
	XLOC_001046	1	152750550	152757544	+	protein_coding	NA	FALSE	none	1566	0	NA	protein_coding	0	0	0	0	0	0	0	0	0	0	no	NA	NA	NA	NA	NA	ENSMUSG00000055547	protein_coding	NA	NA	NA	NA
	XLOC_001047	1	152766541	152775597	+	protein_coding	NA	FALSE	protein_coding	1914	0	0.688833	protein_coding	1077.76	833.124	689.08	1189.23	746.137	984.701	685.087	643.299	520.773	681.821	yes	mRNA	9	53	23	205	ENSMUSG00000008475	protein_coding	71.2502	-0.0803219	141.584	-0.043186
	XLOC_001048	1	152807889	152836990	+	protein_coding	NA	FALSE	protein_coding	2596	54	NA	protein_coding	95.312	68.46	22.1997	31.974	5.20319	1.05768	10.253	6.94921	6.66437	5.79451	no	mRNA	NA	NA	NA	NA	ENSMUSG00000026480	protein_coding	NA	NA	NA	NA
	XLOC_001049	1	152955100	153119849	+	protein_coding	NA	FALSE	protein_coding	5306	408	0.879929	protein_coding	961.368	957.28	408.475	318.709	103.023	141.729	18.6418	10.9202	18.089	56.9794	yes	mRNA	10	181	111	113	ENSMUSG00000042751	protein_coding	27.6341	-0.0440291	NA	NA
	XLOC_001050	1	153305431	153306478	+	processed_pseudogene	NA	FALSE	none	1047	0	0.691719	protein_coding	0	0	0	0	0	0	0	0	0	0	no	NA	NA	NA	NA	NA	ENSMUSG00000079138	processed_pseudogene	NA	NA	NA	NA
	XLOC_001051	1	153425161	153452574	+	nonsense_mediated_decay;protein_coding	snoRNA	FALSE	none	3275	337	NA	protein_coding	10.0811	24.3671	15.9838	4.12568	7.28447	3.17304	0.932091	3.97098	4.76026	3.86301	no	NA	NA	NA	NA	NA	ENSMUSG00000042708	nonsense_mediated_decay,protein_coding	NA	NA	NA	NA
	XLOC_001052	1	153440078	153440218	+	snoRNA	nonsense_mediated_decay;protein_coding	FALSE	none	140	0	0.11167	lncRNA	0.916462	0	0	0	2.08128	0	0	0.992745	0	1.9315	no	NA	NA	NA	NA	NA	ENSMUSG00000064435	snoRNA	NA	NA	NA	NA
	XLOC_001053	1	153561182	153561461	+	lncRNA	NA	TRUE	none	279	211	NA	lncRNA	0	0	0.88799	1.03142	0	0	0	0	0	0	no	NA	NA	NA	NA	NA	Necsulea_blastnMacaque.Locus_187773	lncRNA	NA	NA	NA	NA
	XLOC_001054	1	153653024	153697749	+	protein_coding	NA	FALSE	protein_coding	6860	249	NA	protein_coding	0	1.16034	2.66397	4.12568	7.28447	37.0188	22.3702	33.7533	87.5888	115.89	no	mRNA	NA	NA	NA	NA	ENSMUSG00000042671	protein_coding	NA	NA	NA	NA
	XLOC_001055	1	153740348	153745468	+	protein_coding	NA	FALSE	protein_coding	2339	0	NA	protein_coding	3.66585	5.8017	43.5115	53.6338	83.251	449.514	44.7404	51.6227	144.712	169.972	no	mRNA	NA	NA	NA	NA	ENSMUSG00000026475	protein_coding	NA	NA	NA	NA
	XLOC_001056	1	153749425	153764221	+	protein_coding	NA	FALSE	protein_coding	4821	488	0.368225	protein_coding	0	2.32068	3.55196	4.12568	24.9753	11.6345	11.1851	10.9202	32.3698	45.3904	no	mRNA	NA	NA	NA	NA	ENSMUSG00000066800	protein_coding	NA	NA	NA	NA
	XLOC_001057	1	153874344	153876871	+	protein_coding	NA	FALSE	none	2527	386	NA	protein_coding	0	0	0	0	0	0	0.932091	1.98549	0.952052	0.965752	no	NA	NA	NA	NA	NA	ENSMUSG00000043282	protein_coding	NA	NA	NA	NA
	XLOC_001058	1	153891645	153893060	+	protein_coding	NA	FALSE	none	1415	0	NA	protein_coding	0	0	0	0	0	0	0	0	0	0	no	NA	NA	NA	NA	NA	ENSMUSG00000047053	protein_coding	NA	NA	NA	NA
	XLOC_001059	1	153899925	153909723	+	protein_coding;miRNA	protein_coding	FALSE	none	2912	69	1.61563	protein_coding	1451.68	1093.04	3437.41	2290.78	1473.54	2342.76	4189.75	2219.78	2521.99	1874.53	no	NA	NA	NA	NA	NA	NA	NA	NA	NA	NA	NA
	XLOC_001060	1	153905300	153916910	+	protein_coding	protein_coding;miRNA	FALSE	none	462	104	NA	lncRNA	1.83292	5.8017	1.77598	1.03142	8.3251	3.17304	13.0493	12.9057	12.3767	10.6233	no	NA	NA	NA	NA	NA	ENSMUSG00000078493	protein_coding	NA	NA	NA	NA
	XLOC_001061	1	154029923	154030992	+	lncRNA	NA	TRUE	none	764	0	NA	lncRNA	0.916462	0	0	0	0	0	0	0	0	0	no	NA	NA	NA	NA	NA	Necsulea_Locus_80159	lncRNA	NA	NA	NA	NA
	XLOC_001062	1	154032249	154033168	+	lncRNA	NA	TRUE	none	569	71	NA	lncRNA	0.916462	0	0	1.03142	0	0	0	0.992745	1.9041	0	no	NA	NA	NA	NA	NA	Necsulea_Locus_80808	lncRNA	NA	NA	NA	NA
	XLOC_001063	1	154161643	154179340	+	lncRNA	NA	TRUE	none	971	0	NA	lncRNA	0	0	0	0	0	0	0	0	0	0	no	NA	NA	NA	NA	NA	Necsulea_Locus_81109	lncRNA	NA	NA	NA	NA
	XLOC_001064	1	154201186	154205674	+	protein_coding	NA	FALSE	none	1877	0	NA	protein_coding	0	0	0	0	0	0	0	0	0	0	no	NA	NA	NA	NA	NA	ENSMUSG00000066797	protein_coding	NA	NA	NA	NA
	XLOC_001065	1	154256981	154270403	+	lncRNA	NA	TRUE	none	721	147	NA	lncRNA	0	0	0	0	0	0	0	0	0	0	no	NA	NA	NA	NA	NA	Necsulea_Locus_81342	lncRNA	NA	NA	NA	NA
	XLOC_001066	1	154911833	154913538	+	lncRNA	NA	TRUE	none	376	331	NA	lncRNA	0	0	0	0	0	0	0	0	0	0	no	NA	NA	NA	NA	NA	Necsulea_Locus_81821|Necsulea_Locus_81421	lncRNA	NA	NA	NA	NA
	XLOC_001067	1	155051221	155055558	+	lncRNA	NA	TRUE	none	539	191	NA	lncRNA	1.83292	0	0	0	0	1.05768	0	0.992745	0.952052	0.965752	no	NA	NA	NA	NA	NA	Necsulea_CUFF.136816	lncRNA	NA	NA	NA	NA
	XLOC_001068	1	155083634	155084124	+	lncRNA	NA	TRUE	none	398	0	NA	lncRNA	0	0	0	0	0	0	0	0	1.9041	3.86301	no	NA	NA	NA	NA	NA	Guttman_lincRNA_398|Ensembl_ENSMUSG00000096950|Necsulea_ENSMUSG00000086217|Necsulea_Locus_81386	lncRNA	NA	NA	NA	NA
	XLOC_001069	1	155158678	155211255	+	protein_coding	NA	FALSE	protein_coding	10339	1427	0.62296	protein_coding	420.656	396.836	375.62	465.17	422.499	475.956	557.391	598.625	620.738	771.636	yes	mRNA	10	199	4	111	ENSMUSG00000026470	protein_coding	19.8433	0.033621	49.4972	0.169444
	XLOC_001070	1	155256624	155259112	+	lncRNA	NA	TRUE	none	327	164	NA	lncRNA	0	0	1.77598	0	0	0	0	0	0	0	no	NA	NA	NA	NA	NA	Necsulea_Locus_81032	lncRNA	NA	NA	NA	NA
	XLOC_001071	1	155315965	155316089	+	miRNA	NA	FALSE	none	124	124	NA	lncRNA	0	0	0	0	0	0	0	0	0	0	no	NA	NA	NA	NA	NA	ENSMUSG00000093286	miRNA	NA	NA	NA	NA
	XLOC_001072	1	155456626	155457956	+	lncRNA	NA	TRUE	none	843	149	0.465322	lncRNA	0	0	0	0	0	0	0	0	0	0	no	NA	NA	NA	NA	NA	Necsulea_Locus_80848	lncRNA	NA	NA	NA	NA
	XLOC_001073	1	155516100	155516232	+	lncRNA	NA	TRUE	none	132	0	NA	lncRNA	0	0	0	0	0	0	0	0	0	0	no	NA	NA	NA	NA	NA	Necsulea_blastnGorilla.Locus_62206|Necsulea_blastnMacaque.Locus_190639	lncRNA	NA	NA	NA	NA
	XLOC_001074	1	155557950	155687723	+	protein_coding	NA	FALSE	protein_coding	2606	554	1.3746	protein_coding	444.484	379.431	469.746	437.322	357.979	395.573	401.731	312.715	376.061	320.63	yes	mRNA	2	17	32	174	ENSMUSG00000033701	protein_coding	10.9915	-0.418396	37.2534	-0.31415
	XLOC_001075	1	155696297	155697603	+	NA	NA	FALSE	none	1306	411	NA	lncRNA	0	2.32068	0	1.03142	6.24383	2.11536	4.66046	7.94196	3.80821	5.79451	no	NA	NA	NA	NA	NA	NA	NA	NA	NA	NA	NA
	XLOC_001076	1	155954573	155954722	+	snRNA	NA	FALSE	none	149	149	NA	lncRNA	0	0	0	0	0	0	0	0	0	0	no	NA	NA	NA	NA	NA	ENSMUSG00000077419	snRNA	NA	NA	NA	NA
	XLOC_001077	1	156035402	156068965	+	protein_coding	NA	FALSE	protein_coding	8891	686	0.707625	protein_coding	2320.48	1984.18	1577.07	1705.97	1378.85	1658.44	1678.7	1363.04	1222.44	1257.41	yes	mRNA	27	291	29	332	ENSMUSG00000050565	protein_coding	142.173	0.0716608	323.851	0.229885
	XLOC_001078	1	156310726	156328035	+	protein_coding	NA	FALSE	none	3116	717	NA	protein_coding	0	0	0.88799	0	1.04064	1.05768	0	0	0.952052	0	no	NA	NA	NA	NA	NA	ENSMUSG00000026602	protein_coding	NA	NA	NA	NA
	XLOC_001079	1	156366039	156366484	+	protein_coding	NA	FALSE	none	445	0	1.83307	protein_coding	29.3268	18.5654	15.9838	21.6598	8.3251	9.51913	8.38882	5.95647	12.3767	6.76027	no	NA	NA	NA	NA	NA	ENSMUSG00000078193	protein_coding	420.152	-0.330688	550.057	-0.536639
	XLOC_001080	1	156500492	156501570	+	lncRNA	NA	TRUE	none	691	306	0.585786	lncRNA	0	0	0	0	0	0	0	0	0	0	no	NA	NA	NA	NA	NA	Necsulea_Locus_80768	lncRNA	NA	NA	NA	NA
	XLOC_001081	1	156524091	156526659	+	processed_pseudogene	NA	FALSE	none	2568	72	1.12151	protein_coding	686.43	612.659	650.008	521.898	361.101	438.938	392.41	324.628	332.266	369.883	no	NA	NA	NA	NA	NA	ENSMUSG00000096493	processed_pseudogene	NA	NA	NA	NA
	XLOC_001082	1	156558778	156649792	+	protein_coding	NA	FALSE	protein_coding	11264	210	0.351912	protein_coding	1364.61	2176.8	2548.53	2481.6	2767.06	2413.63	1640.48	1816.72	1590.88	1382.96	yes	mRNA	4	50	26	293	ENSMUSG00000026596	protein_coding	112.518	0.0870937	174.048	-0.100345
	XLOC_001083	1	156655881	156657818	+	nonsense_mediated_decay;protein_coding	NA	FALSE	none	1937	114	NA	lncRNA	2.74938	2.32068	1.77598	2.06284	12.4877	15.8652	10.253	20.8476	6.66437	8.69177	no	NA	NA	NA	NA	NA	ENSMUSG00000060519	nonsense_mediated_decay,protein_coding	48.7926	0.0573791	NA	NA
	XLOC_001084	1	156793511	156793844	+	processed_pseudogene	NA	FALSE	none	333	0	0.296906	lncRNA	0	0	0	0	1.04064	0	0	0	0	0	no	NA	NA	NA	NA	NA	ENSMUSG00000046057	processed_pseudogene	NA	NA	NA	NA
	XLOC_001085	1	156838561	156861078	+	protein_coding	NA	FALSE	protein_coding	2841	76	NA	protein_coding	0	0	0	0	0	0	0.932091	6.94921	31.4177	33.8013	no	NA	NA	NA	NA	NA	ENSMUSG00000033544	protein_coding	NA	NA	NA	NA
	XLOC_001086	1	156939666	156942815	+	NA	NA	FALSE	none	3149	597	NA	lncRNA	15.5798	15.0844	3.55196	4.12568	17.6908	15.8652	45.6725	52.6155	57.1231	37.6643	no	lncRNA	NA	NA	NA	NA	NA	NA	NA	NA	NA	NA
	XLOC_001087	1	156950958	156953055	+	lncRNA	NA	TRUE	none	209	8	NA	lncRNA	0	0	0	0	1.04064	0	0	0.992745	0	0	no	NA	NA	NA	NA	NA	Necsulea_Locus_81312	lncRNA	NA	NA	NA	NA
	XLOC_001088	1	157412351	157420235	+	protein_coding	NA	FALSE	protein_coding	1193	35	1.62082	lncRNA	1457.17	1091.88	1030.96	988.1	562.985	832.395	438.083	368.308	489.355	506.054	yes	mRNA	2	14	14	48	ENSMUSG00000049881	protein_coding	117.649	-0.316064	66.7339	-0.237759
	XLOC_001089	1	157458579	157489060	+	protein_coding	NA	FALSE	protein_coding	1668	341	NA	protein_coding	91.6462	87.0254	55.9433	63.948	66.6008	49.711	65.2464	26.8041	41.8903	18.3493	no	mRNA	NA	NA	NA	NA	ENSMUSG00000033488	protein_coding	NA	NA	NA	NA
	XLOC_001090	1	157506727	157568425	+	protein_coding	NA	FALSE	none	5348	217	0.328211	protein_coding	0.916462	0	7.99191	1.03142	0	1.05768	4.66046	3.97098	4.76026	0.965752	no	mRNA	NA	NA	NA	NA	ENSMUSG00000026589	protein_coding	NA	NA	NA	NA
	XLOC_001091	1	158362303	158691832	+	protein_coding	miRNA	FALSE	none	7502	110	NA	protein_coding	2.74938	0	10.6559	19.597	58.2757	37.0188	74.5673	95.3035	124.719	210.534	no	NA	NA	NA	NA	NA	ENSMUSG00000026587	protein_coding	NA	NA	NA	NA
	XLOC_001092	1	158505624	158505733	+	miRNA	protein_coding	FALSE	none	109	0	NA	lncRNA	0	0	0	0	0	0	0	0.992745	0	0	no	NA	NA	NA	NA	NA	ENSMUSG00000070103	miRNA	NA	NA	NA	NA
	XLOC_001093	1	159134270	159166409	+	lncRNA	NA	FALSE	none	983	214	NA	lncRNA	0	0	0	0	0	0	0	0	0	0	no	NA	NA	NA	NA	NA	Necsulea_Locus_81451	Overlap	NA	NA	NA	NA
	XLOC_001094	1	159231981	159358985	+	protein_coding	snoRNA;NA	FALSE	none	15307	3199	0.175237	protein_coding	1301.38	1228.8	1074.47	1194.38	1288.31	1278.74	1464.32	1626.12	1538.52	1734.49	no	NA	NA	NA	NA	NA	ENSMUSG00000040782	protein_coding	22.5477	-0.245424	57.318	-0.237683
	XLOC_001095	1	159340282	159340422	+	snoRNA	protein_coding	FALSE	none	140	0	0.0163419	lncRNA	2.74938	4.64136	1.77598	0	8.3251	6.34609	13.0493	15.8839	9.52052	6.76027	no	NA	NA	NA	NA	NA	ENSMUSG00000089536	snoRNA	NA	NA	NA	NA
	XLOC_001096	1	159352535	159353191	+	NA	protein_coding	FALSE	none	656	235	NA	lncRNA	1.83292	1.16034	5.32794	6.18852	9.36574	11.6345	8.38882	23.8259	13.3287	16.4178	no	NA	NA	NA	NA	NA	NA	NA	NA	NA	NA	NA
	XLOC_001097	1	159523799	159924705	+	protein_coding	protein_coding	FALSE	protein_coding	5148	39	NA	protein_coding	0	0	0	0	1.04064	0	1.86418	1.98549	19.041	46.3561	no	NA	NA	NA	NA	NA	ENSMUSG00000015829	protein_coding	NA	NA	NA	NA
	XLOC_001098	1	159614748	159684875	+	protein_coding	protein_coding	FALSE	none	1168	0	NA	lncRNA	0	0	0	0	0	0	0	0	0	0	no	NA	NA	NA	NA	NA	ENSMUSG00000073528	protein_coding	NA	NA	NA	NA
	XLOC_001099	1	160044383	160078428	+	protein_coding	NA	FALSE	none	3955	256	NA	protein_coding	1.83292	1.16034	0.88799	6.18852	5.20319	7.40377	5.59255	6.94921	6.66437	11.589	no	NA	NA	NA	NA	NA	NA	NA	NA	NA	NA	NA
	XLOC_001100	1	160195214	160202170	+	nonsense_mediated_decay;protein_coding	NA	FALSE	none	3258	1176	1.25567	protein_coding	912.796	603.376	760.119	602.349	247.672	340.573	260.986	205.498	215.164	282	no	NA	NA	NA	NA	NA	ENSMUSG00000058267	nonsense_mediated_decay,protein_coding	305.583	-0.437402	245.308	-0.457333
	XLOC_001101	1	160212964	160215179	+	NA	NA	FALSE	none	2215	829	0.571068	lncRNA	26.5774	24.3671	21.3117	36.0997	27.0566	32.7881	29.8269	46.659	47.6026	38.6301	no	lncRNA	NA	NA	NA	NA	NA	NA	NA	NA	NA	NA
	XLOC_001102	1	160215281	160216341	+	NA	NA	FALSE	none	1060	700	NA	lncRNA	4.58231	2.32068	0.88799	1.03142	2.08128	0	3.72837	5.95647	3.80821	7.72602	no	NA	NA	NA	NA	NA	NA	NA	NA	NA	NA	NA
	XLOC_001103	1	160645572	160645704	+	snoRNA	NA	FALSE	none	132	0	NA	lncRNA	0	0	0	0	0	0	0	0	0	0	no	NA	NA	NA	NA	NA	ENSMUSG00000077759	snoRNA	NA	NA	NA	NA
	XLOC_001104	1	160883570	160884795	+	lncRNA	NA	TRUE	none	631	538	NA	lncRNA	0	0	0	0	0	0	0	0	0	0	no	NA	NA	NA	NA	NA	Necsulea_CUFF.137331	lncRNA	NA	NA	10.5493	0.97754
	XLOC_001105	1	160893119	160893584	+	processed_pseudogene	NA	FALSE	none	465	0	1.21821	protein_coding	0	0	0	0	0	0	0	0	0	0	no	NA	NA	NA	NA	NA	ENSMUSG00000057499	processed_pseudogene	NA	NA	NA	NA
	XLOC_001106	1	160906417	160974978	+	protein_coding	NA	FALSE	protein_coding	11006	619	0.295018	protein_coding	735.002	927.111	1171.26	1426.45	1727.46	1740.94	1451.27	1971.59	1443.31	1709.38	yes	mRNA	24	605	20	269	ENSMUSG00000040423	protein_coding	80.8336	-0.0254726	222.123	-0.0105865
	XLOC_001107	1	160978605	161003010	+	protein_coding	NA	FALSE	protein_coding	2157	115	NA	protein_coding	0.916462	0	1.77598	1.03142	6.24383	5.2884	2.79627	12.9057	0.952052	4.82876	no	mRNA	NA	NA	NA	NA	ENSMUSG00000026715	protein_coding	NA	NA	10.2623	-0.264623
	XLOC_001108	1	161034605	161040694	+	snoRNA	snoRNA	FALSE	none	5905	434	0.0150685	lncRNA	5992.74	4785.24	5671.59	5275.71	3205.17	2778.53	2487.75	2587.09	3351.22	2919.47	no	NA	NA	NA	NA	NA	NA	NA	NA	NA	NA	NA
	XLOC_001109	1	161038307	161038383	+	snoRNA	snoRNA	FALSE	none	76	0	0.0148321	lncRNA	8.24815	1.16034	5.32794	7.21994	3.12191	1.05768	1.86418	1.98549	0	1.9315	no	NA	NA	NA	NA	NA	ENSMUSG00000065228	snoRNA	NA	NA	NA	NA
	XLOC_001110	1	161070766	161086918	+	nonsense_mediated_decay;protein_coding	NA	FALSE	none	5493	2153	0.781963	protein_coding	103.56	112.553	123.431	118.613	123.836	138.556	173.369	226.346	164.705	156.452	no	NA	NA	NA	NA	NA	ENSMUSG00000026708	nonsense_mediated_decay,protein_coding	40.6741	0.0639236	53.9032	-0.0132366
	XLOC_001111	1	161142690	161170753	+	protein_coding	NA	FALSE	protein_coding	3990	135	NA	protein_coding	93.4791	47.5739	214.005	144.399	42.6662	26.442	31.6911	38.7171	18.089	16.4178	yes	mRNA	9	68	11	66	ENSMUSG00000044835	protein_coding	16.4045	0.173283	NA	NA
	XLOC_001112	1	161251282	161252442	+	NA	NA	FALSE	none	1160	127	NA	lncRNA	1.83292	0	8.8799	6.18852	1.04064	1.05768	0	0.992745	3.80821	1.9315	no	lncRNA	NA	NA	NA	NA	NA	NA	NA	NA	NA	NA
	XLOC_001113	1	161395408	161418410	+	protein_coding	NA	FALSE	none	1842	0	NA	protein_coding	0	0	0	0	0	0	0	0.992745	0	0	no	NA	NA	NA	NA	NA	ENSMUSG00000026700	protein_coding	NA	NA	NA	NA
	XLOC_001114	1	161494654	161505290	+	protein_coding	NA	FALSE	none	2066	0	NA	protein_coding	0	0	3.55196	0	3.12191	0	0	0	0	0	no	NA	NA	NA	NA	NA	ENSMUSG00000066755	protein_coding	NA	NA	NA	NA
	XLOC_001115	1	161877838	161882914	+	lncRNA	NA	FALSE	none	1904	1119	NA	lncRNA	18.3292	3.48102	23.9757	8.25136	3.12191	1.05768	1.86418	2.97823	0.952052	0.965752	no	NA	NA	NA	NA	NA	Guttman_lincRNA_410	Overlap	NA	NA	NA	NA
	XLOC_001116	1	161891773	161912601	+	lncRNA	NA	TRUE	none	1749	102	NA	lncRNA	0	0	0	0	0	0	0	0.992745	0	0	no	NA	NA	NA	NA	NA	Necsulea_Locus_80858	lncRNA	NA	NA	NA	NA
	XLOC_001117	1	161969185	161973596	+	protein_coding	NA	FALSE	protein_coding	3643	151	0.878202	protein_coding	101.727	80.0634	38.1836	34.0369	43.7068	79.3261	89.4808	102.253	145.664	178.664	yes	mRNA	7	170	46	83	ENSMUSG00000026698	protein_coding	NA	NA	30.6209	0.0262565
	XLOC_001118	1	162217456	162218718	+	miRNA	NA	FALSE	none	1262	32	0.259457	lncRNA	0	0	0	0	0	0	0	3.97098	2.85616	15.452	no	NA	NA	NA	NA	NA	ENSMUSG00000070126	miRNA	NA	NA	NA	NA
	XLOC_001119	1	162222517	162223683	+	miRNA	NA	FALSE	none	1166	0	0.556949	lncRNA	0	0	0	0	0	0	0	5.95647	1.9041	15.452	no	NA	NA	NA	NA	NA	ENSMUSG00000065516	miRNA	NA	NA	NA	NA
	XLOC_001120	1	162316091	162316521	+	processed_pseudogene	NA	FALSE	none	430	6	NA	lncRNA	0	0	0	0	0	0	0	0	0	0	no	NA	NA	NA	NA	NA	ENSMUSG00000089933	processed_pseudogene	NA	NA	NA	NA
	XLOC_001121	1	162477679	162479943	+	protein_coding	NA	FALSE	none	2264	748	NA	lncRNA	0	0	0	0	0	0	0	0	0	0	no	NA	NA	NA	NA	NA	ENSMUSG00000066752	protein_coding	NA	NA	NA	NA
	XLOC_001122	1	162570514	162599289	+	protein_coding	NA	FALSE	protein_coding	5810	610	0.901343	protein_coding	238.28	293.566	91.4629	109.33	136.324	196.729	247.004	269.034	301.801	306.144	yes	mRNA	1	98	9	74	ENSMUSG00000026696	protein_coding	20.0167	-0.120955	53.8757	-0.186594
	XLOC_001123	1	162639149	162649693	+	protein_coding	NA	FALSE	none	2079	0	NA	protein_coding	0	0	0	0	0	0	0.932091	0	0.952052	0	no	NA	NA	NA	NA	NA	ENSMUSG00000026697	protein_coding	NA	NA	NA	NA
	XLOC_001124	1	162770181	162770380	+	NA	NA	TRUE	none	199	0	0.273849	lncRNA	66.9017	66.1393	70.1512	61.8852	26.016	37.0188	23.3023	19.8549	17.1369	21.2466	no	NA	NA	NA	NA	NA	NA	NA	NA	NA	NA	NA
	XLOC_001125	1	163118226	163118348	+	snoRNA	NA	FALSE	none	122	0	NA	lncRNA	0	0	0	0	0	0	0	0	0	0	no	NA	NA	NA	NA	NA	ENSMUSG00000089174	snoRNA	NA	NA	NA	NA
	XLOC_001126	1	163402282	163402390	+	snRNA	NA	FALSE	none	108	0	NA	lncRNA	0	0	0	0	0	0	0	0	0	0	no	NA	NA	NA	NA	NA	ENSMUSG00000088951	snRNA	NA	NA	NA	NA
	XLOC_001127	1	163423545	163478118	+	lncRNA	lncRNA	TRUE	none	697	0	NA	lncRNA	0	0	0	0	0	0	0	0	0	0	no	NA	NA	NA	NA	NA	Necsulea_blastnHuman.ENSG00000231407|Necsulea_Locus_81091	lncRNA	NA	NA	NA	NA
	XLOC_001128	1	163442734	163443472	+	lncRNA	lncRNA	TRUE	none	234	0	NA	lncRNA	0	0	0	0	0	0	0	0	0	0	no	NA	NA	NA	NA	NA	Necsulea_blastnHuman.ENSG00000231407|Necsulea_Locus_81091	lncRNA	NA	NA	NA	NA
	XLOC_001129	1	163578397	163580065	+	lncRNA	NA	TRUE	none	518	467	NA	lncRNA	0	0	0	0	0	0	0	0	0	0	no	NA	NA	NA	NA	NA	Necsulea_Locus_81157	lncRNA	NA	NA	NA	NA
	XLOC_001130	1	163607753	163610169	+	lncRNA	NA	TRUE	none	785	0	NA	lncRNA	0	0	0	0	0	0	0	0.992745	0	0	no	NA	NA	NA	NA	NA	Necsulea_blastnHuman.ENSG00000224286	lncRNA	NA	NA	NA	NA
	XLOC_001131	1	163624616	163624734	+	NA	NA	TRUE	none	118	0	NA	lncRNA	0.916462	2.32068	1.77598	1.03142	0	1.05768	0.932091	0	0.952052	0.965752	no	NA	NA	NA	NA	NA	NA	NA	NA	NA	NA	NA
	XLOC_001132	1	163729568	163730610	+	processed_pseudogene	NA	FALSE	none	1042	0	NA	lncRNA	0	0	0	0	0	0	0	0	0	0	no	NA	NA	NA	NA	NA	ENSMUSG00000089700	processed_pseudogene	NA	NA	NA	NA
	XLOC_001133	1	163779582	163917109	+	protein_coding	NA	FALSE	protein_coding	4012	67	1.91112	protein_coding	981.53	877.216	1005.2	1028.33	704.512	979.413	838.882	748.53	767.354	970.581	yes	mRNA	21	204	9	56	ENSMUSG00000026585	protein_coding	87.5498	0.177557	114.101	0.257052
	XLOC_001134	1	163929099	163955126	+	nonsense_mediated_decay;protein_coding	NA	FALSE	none	4689	0	0.601056	protein_coding	303.349	214.663	252.189	259.918	239.347	185.094	202.264	238.259	193.267	213.431	no	NA	NA	NA	NA	NA	ENSMUSG00000026584	nonsense_mediated_decay,protein_coding	15.5516	-0.0561319	20.9668	-0.0151207
	XLOC_001135	1	163994888	163998240	+	protein_coding	NA	FALSE	protein_coding	2510	211	1.45932	protein_coding	245.612	176.372	256.629	221.755	90.5355	116.345	89.4808	71.4776	94.2532	92.7122	no	mRNA	NA	NA	NA	NA	ENSMUSG00000041396	protein_coding	29.4263	0.141969	NA	NA
	XLOC_001136	1	164048233	164057677	+	protein_coding	NA	FALSE	none	2912	0	NA	protein_coding	0	0	0	0	0	0	1.86418	0	0	0	no	NA	NA	NA	NA	NA	ENSMUSG00000026582	protein_coding	NA	NA	NA	NA
	XLOC_001137	1	164062075	164080785	+	protein_coding	NA	FALSE	none	2321	59	NA	protein_coding	0.916462	0	0	1.03142	0	0	0	0	0	0	no	NA	NA	NA	NA	NA	ENSMUSG00000026581	protein_coding	NA	NA	NA	NA
	XLOC_001138	1	164115263	164150026	+	nonsense_mediated_decay;protein_coding	NA	FALSE	none	3630	30	NA	protein_coding	0	0	0	0	0	0	0	0	0.952052	1.9315	no	NA	NA	NA	NA	NA	ENSMUSG00000026580	nonsense_mediated_decay,protein_coding	NA	NA	NA	NA
	XLOC_001139	1	164151837	164220277	+	protein_coding	processed_pseudogene	FALSE	none	7430	171	NA	protein_coding	0.916462	2.32068	18.6478	48.4767	64.5196	705.473	34.4874	21.8404	5.71231	7.72602	no	NA	NA	NA	NA	NA	ENSMUSG00000026579	protein_coding	NA	NA	NA	NA
	XLOC_001140	1	164166578	164166933	+	processed_pseudogene	protein_coding	FALSE	none	355	36	NA	lncRNA	0	0	0.88799	0	0	0	0	0	0	0	no	NA	NA	NA	NA	NA	ENSMUSG00000089790	processed_pseudogene	NA	NA	NA	NA
	XLOC_001141	1	164249045	164265385	+	protein_coding	NA	FALSE	protein_coding	3602	17	0.904307	protein_coding	1047.52	1329.75	990.996	1043.8	607.733	712.877	443.675	367.316	466.506	424.931	yes	mRNA	9	275	52	604	ENSMUSG00000040918	protein_coding	76.7426	0.0525986	108.075	-0.0513587
	XLOC_001142	1	164275584	164287937	+	protein_coding	NA	FALSE	protein_coding	2073	38	2.05132	protein_coding	140.219	117.194	110.111	80.4507	81.1698	191.44	121.172	60.5574	100.918	100.438	no	mRNA	NA	NA	NA	NA	ENSMUSG00000026578	protein_coding	23.8854	-0.0215581	22.5304	0.109234
	XLOC_001143	1	164307656	164437288	+	protein_coding	NA	FALSE	protein_coding	1807	109	1.69131	protein_coding	675.432	514.03	545.226	446.605	240.387	474.899	244.208	271.019	229.445	266.548	no	mRNA	NA	NA	NA	NA	ENSMUSG00000026575	protein_coding	34.2307	0.29344	33.7847	0.542448
	XLOC_001144	1	164459052	164464483	+	lncRNA	NA	FALSE	none	1788	597	NA	lncRNA	10.9975	19.7258	1.77598	4.12568	14.5689	6.34609	6.52464	8.9347	10.4726	4.82876	no	lncRNA	NA	NA	NA	NA	Guttman_lincRNA_412	Overlap	NA	NA	NA	NA
	XLOC_001145	1	164467874	164468995	+	NA	NA	TRUE	lincRNA	1121	391	NA	lncRNA	10.0811	5.8017	0	0	1.04064	1.05768	0	0.992745	0	0	no	NA	NA	NA	NA	NA	NA	NA	NA	NA	NA	NA
	XLOC_001146	1	164471048	164472017	+	NA	NA	TRUE	none	969	83	NA	lncRNA	3.66585	8.12237	0	0	0	0	0	0	0	0	no	NA	NA	NA	NA	NA	NA	NA	NA	NA	NA	NA
	XLOC_001147	1	164473389	164487986	+	lncRNA	NA	TRUE	none	1888	526	NA	lncRNA	5.49877	5.8017	0	1.03142	1.04064	0	0	0	0.952052	0	no	NA	NA	NA	NA	NA	Necsulea_Locus_80634	lncRNA	NA	NA	NA	NA
	XLOC_001148	1	164503306	164569333	+	lncRNA	NA	TRUE	none	2491	611	NA	lncRNA	5.49877	6.96204	0	1.03142	0	0	0	1.98549	0	0.965752	no	NA	NA	NA	NA	NA	Ensembl_ENSMUSG00000097281|Necsulea_ENSMUSG00000086116	lncRNA	NA	NA	NA	NA
	XLOC_001149	1	164570440	164574137	+	lncRNA	NA	TRUE	none	3382	428	NA	lncRNA	4.58231	3.48102	0.88799	0	0	0	0.932091	0	0	0	no	NA	NA	NA	NA	NA	Necsulea_CUFF.137817	lncRNA	NA	NA	NA	NA
	XLOC_001150	1	164577313	164577465	+	lncRNA	NA	TRUE	none	152	0	NA	lncRNA	0	0	0	0	0	0	0	0	0	0	no	NA	NA	NA	NA	NA	Necsulea_blastnPan.Locus_42824	TooShort	NA	NA	NA	NA
	XLOC_001151	1	164644939	164646101	+	lncRNA	NA	TRUE	none	75	0	NA	lncRNA	0	0	0	0	0	0	0	0	0	0	no	NA	NA	NA	NA	NA	Guttman_lincRNA_413	TooShort	NA	NA	NA	NA
	XLOC_001152	1	164796731	164824266	+	protein_coding	NA	FALSE	none	1636	28	1.61236	protein_coding	0	0	0	0	0	0	0	0	0	0	no	NA	NA	NA	NA	NA	ENSMUSG00000026574	protein_coding	NA	NA	NA	NA
	XLOC_001153	1	164862863	164872360	+	lncRNA	NA	TRUE	none	3637	893	NA	lncRNA	0	0	0	0	0	0	0.932091	0	0	0	no	NA	NA	NA	NA	NA	Necsulea_Locus_82719|Necsulea_Locus_80983|Guttman_lincRNA_414	lncRNA	NA	NA	NA	NA
	XLOC_001154	1	164960861	164972669	+	lncRNA	NA	TRUE	none	3911	524	NA	lncRNA	0	0	0	0	0	0	0	0	0	0	no	NA	NA	NA	NA	NA	Necsulea_Locus_82304|Necsulea_CUFF.137903	lncRNA	NA	NA	NA	NA
	XLOC_001155	1	165024344	165024456	+	miRNA	NA	FALSE	none	112	112	NA	lncRNA	0	0	0	0	0	0	0	0	0	0	no	NA	NA	NA	NA	NA	ENSMUSG00000080561	miRNA	NA	NA	NA	NA
	XLOC_001156	1	165072540	165073711	+	lncRNA	NA	TRUE	none	694	193	NA	lncRNA	0	0	0	0	0	0	0	0	0	0	no	NA	NA	NA	NA	NA	Necsulea_Locus_80770	lncRNA	NA	NA	NA	NA
	XLOC_001157	1	165109362	165111545	+	lncRNA	NA	TRUE	none	1075	39	NA	lncRNA	0	0	0	0	0	0	0	0	0	0	no	NA	NA	NA	NA	NA	Necsulea_Locus_81889|Necsulea_Locus_80411	lncRNA	NA	NA	NA	NA
	XLOC_001158	1	165281824	165327858	+	protein_coding	NA	FALSE	protein_coding	9819	860	0.19248	protein_coding	97.1449	113.713	71.0392	159.87	231.022	148.075	323.436	377.243	351.307	441.349	yes	mRNA	6	157	8	44	ENSMUSG00000040836	protein_coding	NA	NA	NA	NA
	XLOC_001159	1	165440624	165440709	+	snoRNA	NA	FALSE	none	85	0	NA	lncRNA	0	0	0	0	0	0	0	0	0	0	no	NA	NA	NA	NA	NA	ENSMUSG00000089299	snoRNA	NA	NA	NA	NA
	XLOC_001160	1	165460597	165481214	+	protein_coding	NA	FALSE	protein_coding	1464	111	1.17648	protein_coding	308.848	235.549	151.846	112.425	60.357	51.8264	137.017	89.347	130.431	169.007	no	mRNA	NA	NA	NA	NA	ENSMUSG00000026568	protein_coding	20.494	-0.473694	27.8062	-0.00856577
	XLOC_001161	1	165485182	165576774	+	nonsense_mediated_decay;protein_coding	NA	FALSE	none	6077	211	NA	protein_coding	0	0	0	2.06284	7.28447	0	3.72837	1.98549	0.952052	0.965752	no	NA	NA	NA	NA	NA	ENSMUSG00000026567	nonsense_mediated_decay,protein_coding	NA	NA	NA	NA
	XLOC_001162	1	165634705	165636897	+	NA	NA	FALSE	none	2192	272	NA	lncRNA	5.49877	2.32068	1.77598	9.28278	6.24383	6.34609	13.9814	13.8984	29.5136	19.315	no	lncRNA	NA	NA	NA	NA	NA	NA	NA	NA	NA	NA
	XLOC_001163	1	165735821	165736455	+	lncRNA	NA	TRUE	none	335	0	NA	lncRNA	0	0	0	0	0	0	0	0	0	0	no	NA	NA	NA	NA	NA	Necsulea_Locus_81444	lncRNA	NA	NA	NA	NA
	XLOC_001164	1	165763745	165775308	+	nonsense_mediated_decay;protein_coding	NA	FALSE	none	2362	286	2.35916	protein_coding	365.668	324.895	105.671	134.085	135.283	173.46	301.998	212.447	237.061	224.055	no	NA	NA	NA	NA	NA	ENSMUSG00000040713	nonsense_mediated_decay,protein_coding	NA	NA	60.4697	-0.0655475
	XLOC_001165	1	165788680	165871153	+	nonsense_mediated_decay;protein_coding	NA	FALSE	none	4604	37	NA	protein_coding	0	2.32068	1.77598	2.06284	0	1.05768	0.932091	1.98549	4.76026	1.9315	no	NA	NA	NA	NA	NA	ENSMUSG00000005763	nonsense_mediated_decay,protein_coding	NA	NA	NA	NA
	XLOC_001166	1	165941617	165943526	+	processed_pseudogene	NA	FALSE	none	1909	37	NA	lncRNA	0	0	0	0	0	0	0	0	0	0	no	NA	NA	NA	NA	NA	ENSMUSG00000099008	processed_pseudogene	NA	NA	NA	NA
	XLOC_001167	1	166002957	166038258	+	lncRNA	NA	FALSE	none	843	674	NA	lncRNA	0	0	0	0	0	0	0	0.992745	0	0	no	NA	NA	NA	NA	NA	Necsulea_ENSMUSG00000091458|Ensembl_ENSMUSG00000097196	Overlap	NA	NA	NA	NA
	XLOC_001168	1	166130237	166166510	+	protein_coding	NA	FALSE	protein_coding	2515	0	0.683966	protein_coding	559.042	424.684	281.493	245.478	81.1698	64.5185	13.9814	9.92745	9.52052	2.89726	yes	mRNA	5	134	13	33	ENSMUSG00000000544	protein_coding	13.8581	-0.152292	NA	NA
	XLOC_001169	1	166254085	166317022	+	protein_coding	NA	FALSE	protein_coding	8503	726	NA	protein_coding	0	2.32068	49.7274	39.194	17.6908	13.7499	384.022	219.397	561.711	574.623	no	mRNA	NA	NA	NA	NA	ENSMUSG00000040612	protein_coding	NA	NA	27.7216	0.280959
	XLOC_001170	1	166379096	166393621	+	nonsense_mediated_decay;protein_coding	NA	FALSE	none	2315	121	0.785051	protein_coding	147.55	184.494	113.663	200.095	103.023	191.44	301.998	338.526	352.259	509.917	no	NA	NA	NA	NA	NA	ENSMUSG00000026563	nonsense_mediated_decay,protein_coding	NA	NA	70.3058	0.378318
	XLOC_001171	1	166441971	166443382	+	lncRNA	NA	TRUE	none	632	358	NA	lncRNA	0	0	0	0	0	0	0	0	0	0	no	NA	NA	NA	NA	NA	Necsulea_Locus_81282	lncRNA	NA	NA	NA	NA
	XLOC_001172	1	166444583	166444976	+	lncRNA	NA	TRUE	none	298	298	NA	lncRNA	0	0	0	0	0	0	0	0	0	0	no	NA	NA	NA	NA	NA	Necsulea_Locus_81223	lncRNA	NA	NA	NA	NA
	XLOC_001173	1	166620361	166620482	+	miRNA	NA	FALSE	none	121	121	NA	lncRNA	0	0	0	0	0	0	0	0	0	0	no	NA	NA	NA	NA	NA	ENSMUSG00000096172	miRNA	NA	NA	NA	NA
	XLOC_001174	1	166762144	166770485	+	processed_pseudogene	NA	FALSE	none	1601	9	NA	lncRNA	0	0	0	0	0	0	0	0	0	0	no	NA	NA	NA	NA	NA	ENSMUSG00000085841	processed_pseudogene	NA	NA	NA	NA
	XLOC_001175	1	166968294	166969583	+	lncRNA	NA	TRUE	none	464	0	NA	lncRNA	0	0	0	0	0	0	0	0	0	0	no	NA	NA	NA	NA	NA	Necsulea_Locus_82253|Necsulea_Locus_81201	lncRNA	NA	NA	NA	NA
	XLOC_001176	1	167001416	167091302	+	nonsense_mediated_decay;protein_coding	NA	FALSE	none	4986	607	NA	protein_coding	2.74938	3.48102	0	8.25136	16.6502	10.5768	15.8456	18.8622	41.8903	27.0411	no	NA	NA	NA	NA	NA	ENSMUSG00000060568	nonsense_mediated_decay,protein_coding	NA	NA	NA	NA
	XLOC_001177	1	167290124	167290225	+	miRNA	NA	FALSE	none	101	71	NA	lncRNA	0	0	0	0	0	0	0	0	0	0	no	NA	NA	NA	NA	NA	ENSMUSG00000098379	miRNA	NA	NA	NA	NA
	XLOC_001178	1	167308585	167333978	+	protein_coding	NA	FALSE	protein_coding	4682	932	1.35139	protein_coding	861.474	722.891	887.102	889.084	420.418	523.552	564.847	420.924	488.403	568.828	yes	mRNA	12	164	42	234	ENSMUSG00000052428	protein_coding	147.251	-0.0637956	177.632	0.0272553
	XLOC_001179	1	167349024	167349131	+	snRNA	NA	FALSE	none	107	106	0.0136386	lncRNA	0	0	0	0	0	0	0	0	0	0	no	NA	NA	NA	NA	NA	ENSMUSG00000095752	snRNA	NA	NA	NA	NA
	XLOC_001180	1	167349990	167368530	+	protein_coding	NA	FALSE	protein_coding	3223	222	5.08206	protein_coding	722.172	1192.83	1482.05	1203.67	1209.22	1117.97	517.311	381.214	358.924	209.568	yes	mRNA	17	163	26	121	ENSMUSG00000026687	protein_coding	398.956	0.199173	98.8708	0.145519
	XLOC_001181	1	167541313	167542963	+	lncRNA	NA	TRUE	none	388	48	NA	lncRNA	0	0	0	0	0	0	0	0	0	0	no	NA	NA	NA	NA	NA	Necsulea_Locus_81162	lncRNA	NA	NA	NA	NA
	XLOC_001182	1	167598383	167639623	+	protein_coding	NA	FALSE	protein_coding	2297	126	NA	protein_coding	0	0	41.7355	31.974	22.894	40.1919	2.79627	0.992745	0	5.79451	no	mRNA	NA	NA	NA	NA	ENSMUSG00000015843	protein_coding	NA	NA	NA	NA
	XLOC_001183	1	167689231	167848741	+	protein_coding	NA	FALSE	protein_coding	3400	204	NA	protein_coding	4.58231	10.4431	1.77598	2.06284	4.16255	4.23072	10.253	4.96372	61.8834	41.5274	no	mRNA	NA	NA	NA	NA	ENSMUSG00000026686	protein_coding.neuron.differentiation	NA	NA	NA	NA
	XLOC_001184	1	167936730	167940539	+	lncRNA	NA	TRUE	none	1457	50	NA	lncRNA	0	0	0	0	0	0	0	0	0	0	no	NA	NA	NA	NA	NA	Necsulea_Locus_81820|Necsulea_CUFF.138270	lncRNA	NA	NA	NA	NA
	XLOC_001185	1	168115243	168122465	+	lncRNA	NA	TRUE	none	374	76	NA	lncRNA	0	0	0	0	0	0	0.932091	0	0	0	no	NA	NA	NA	NA	NA	Ensembl_ENSMUSG00000093538	lncRNA	NA	NA	NA	NA
	XLOC_001186	1	168432354	168433869	+	NA	NA	FALSE	none	1515	262	NA	lncRNA	0	0	0	0	3.12191	4.23072	12.1172	7.94196	23.8013	14.4863	no	NA	NA	NA	NA	NA	NA	NA	NA	NA	NA	NA
	XLOC_001187	1	168490642	168490762	+	miRNA	NA	FALSE	none	120	0	NA	lncRNA	0	0	0	0	0	0	0	0	0	0	no	NA	NA	NA	NA	NA	ENSMUSG00000098407	miRNA	NA	NA	NA	NA
	XLOC_001188	1	168533795	168533912	+	lncRNA	NA	TRUE	none	117	117	NA	lncRNA	0	0	0	0	0	0	0	0	0	0	no	NA	NA	NA	NA	NA	Necsulea_blastnHuman.Locus_120908	TooShort	NA	NA	NA	NA
	XLOC_001189	1	168572436	168597888	+	lncRNA	lncRNA	TRUE	none	525	297	NA	lncRNA	0	0	0	0	0	0	0	0	0	0	no	NA	NA	NA	NA	NA	Necsulea_Locus_80925|Necsulea_Locus_80923	lncRNA	NA	NA	NA	NA
	XLOC_001190	1	168573592	168659121	+	lncRNA	lncRNA	TRUE	none	217	183	NA	lncRNA	0	0	0	0	0	0	0	0	0	0	no	NA	NA	NA	NA	NA	Necsulea_Locus_80925|Necsulea_Locus_80923	lncRNA	NA	NA	NA	NA
	XLOC_001191	1	168676917	168677034	+	lncRNA	NA	TRUE	none	117	0	NA	lncRNA	0	0	0	0	0	0	0	0	0	0	no	NA	NA	NA	NA	NA	Necsulea_blastnXenopus.Locus_170914	TooShort	NA	NA	NA	NA
	XLOC_001192	1	168994563	168997920	+	lncRNA	NA	TRUE	none	437	113	NA	lncRNA	0	0	0	0	0	0	0	0	0	0	no	NA	NA	NA	NA	NA	Necsulea_CUFF.138292	lncRNA	NA	NA	NA	NA
	XLOC_001193	1	169463021	169470759	+	lncRNA	NA	TRUE	none	551	38	NA	lncRNA	0	0	0	0	0	0	0	0	0	0	no	NA	NA	NA	NA	NA	Necsulea_Locus_80183|Guttman_lincRNA_415	lncRNA	NA	NA	NA	NA
	XLOC_001194	1	169541332	169542378	+	lncRNA	NA	TRUE	none	75	0	NA	lncRNA	0	1.16034	0	0	0	0	0	0	0	0	no	NA	NA	NA	NA	NA	Guttman_lincRNA_417	TooShort	NA	NA	NA	NA
	XLOC_001195	1	169629977	169631059	+	lncRNA	NA	TRUE	none	75	74	NA	lncRNA	0	0	0	0	0	0	0	0	0	0	no	NA	NA	NA	NA	NA	Guttman_lincRNA_418	TooShort	NA	NA	NA	NA
	XLOC_001196	1	169655491	169695813	+	protein_coding	NA	FALSE	protein_coding	4105	241	NA	protein_coding	0	0	0.88799	0	3.12191	24.3267	0.932091	70.4849	17.1369	54.0821	no	NA	NA	NA	NA	NA	ENSMUSG00000026678	protein_coding	NA	NA	NA	NA
	XLOC_001197	1	169928631	169935086	+	protein_coding	NA	FALSE	protein_coding	2183	230	NA	protein_coding	15.5798	1.16034	2.66397	6.18852	13.5283	15.8652	0.932091	2.97823	2.85616	2.89726	no	mRNA	NA	NA	NA	NA	ENSMUSG00000070532	protein_coding	NA	NA	NA	NA
	XLOC_001198	1	169969432	169972395	+	lncRNA	NA	FALSE	none	1131	75	0.762974	lncRNA	9.16462	6.96204	9.76789	18.5656	17.6908	17.9806	11.1851	23.8259	19.9931	28.0068	no	lncRNA	NA	NA	NA	NA	Guttman_lincRNA_419	Overlap	NA	NA	NA	NA
	XLOC_001199	1	170175056	170176160	+	NA	NA	FALSE	none	1104	0	NA	lncRNA	0.916462	0	1.77598	3.09426	2.08128	0	6.52464	7.94196	13.3287	5.79451	no	lncRNA	NA	NA	NA	NA	NA	NA	NA	NA	NA	NA
	XLOC_001200	1	170214859	170215556	+	protein_coding	NA	FALSE	none	697	0	NA	protein_coding	0	1.16034	0	0	1.04064	0	0	0	0	0	no	NA	NA	NA	NA	NA	ENSMUSG00000044306	protein_coding	NA	NA	NA	NA
	XLOC_001201	1	170232748	170253608	+	nonsense_mediated_decay;protein_coding	NA	FALSE	none	2542	569	0.686292	lncRNA	0	0	0	0	0	0	0	0	0	0	no	NA	NA	NA	NA	NA	ENSMUSG00000073494	nonsense_mediated_decay,protein_coding	NA	NA	NA	NA
	XLOC_001202	1	170277375	170285662	+	protein_coding	NA	FALSE	none	1381	359	0.88673	lncRNA	0	0	0	0	0	0	0	0	0	0	no	NA	NA	NA	NA	NA	ENSMUSG00000096334	protein_coding	NA	NA	NA	NA
	XLOC_001203	1	170308802	170312125	+	protein_coding	NA	FALSE	none	771	0	NA	protein_coding	0	0	0	0	0	0	0	0	0	0	no	NA	NA	NA	NA	NA	ENSMUSG00000042800	protein_coding	NA	NA	NA	NA
	XLOC_001204	1	170644531	170682789	+	protein_coding	NA	FALSE	protein_coding	3095	111	3.08013	protein_coding	0.916462	2.32068	5.32794	17.5341	33.3004	17.9806	57.7897	32.7606	56.1711	34.7671	no	mRNA	NA	NA	NA	NA	ENSMUSG00000038463	protein_coding	NA	NA	NA	NA
	XLOC_001205	1	170868593	170872550	+	NA	NA	FALSE	none	3957	1283	NA	lncRNA	13.7469	9.28271	11.5439	12.377	33.3004	19.0383	13.0493	15.8839	14.2808	23.1781	no	lncRNA	NA	NA	NA	NA	NA	NA	NA	NA	NA	NA
	XLOC_001206	1	170885064	170885890	+	protein_coding	NA	FALSE	none	826	239	NA	lncRNA	0.916462	1.16034	10.6559	11.3456	0	2.11536	4.66046	4.96372	1.9041	5.79451	no	NA	NA	NA	NA	NA	ENSMUSG00000096968	protein_coding	NA	NA	NA	NA
	XLOC_001207	1	170894882	170897454	+	NA	NA	TRUE	lincRNA	2572	805	NA	lncRNA	0	0	19.5358	5.1571	0	2.11536	1.86418	4.96372	5.71231	1.9315	no	lncRNA	NA	NA	NA	NA	NA	NA	NA	NA	NA	NA
	XLOC_001208	1	171018919	171029761	+	protein_coding	snRNA	FALSE	none	1256	69	NA	protein_coding	0	0	0	0	0	0	0	0	0	0	no	NA	NA	NA	NA	NA	ENSMUSG00000059089	protein_coding	NA	NA	NA	NA
	XLOC_001209	1	171027964	171028129	+	snRNA	protein_coding	FALSE	none	165	164	0.0164588	lncRNA	0	0	0.88799	0	1.04064	0	0	0.992745	0	0.965752	no	NA	NA	NA	NA	NA	ENSMUSG00000065905	snRNA	NA	NA	NA	NA
	XLOC_001210	1	171046487	171046772	+	NA	NA	FALSE	none	285	114	NA	lncRNA	3.66585	4.64136	5.32794	6.18852	7.28447	1.05768	1.86418	0	0	1.9315	no	NA	NA	NA	NA	NA	NA	NA	NA	NA	NA	NA
	XLOC_001211	1	171074301	171074614	+	NA	NA	FALSE	none	313	71	0.000456125	lncRNA	0.916462	2.32068	1.77598	1.03142	2.08128	2.11536	1.86418	3.97098	2.85616	2.89726	no	NA	NA	NA	NA	NA	NA	NA	NA	NA	NA	NA
	XLOC_001212	1	171111446	171112225	+	NA	NA	FALSE	none	779	160	NA	lncRNA	0	2.32068	7.99191	7.21994	1.04064	3.17304	2.79627	3.97098	1.9041	4.82876	no	NA	NA	NA	NA	NA	NA	NA	NA	NA	NA	NA
	XLOC_001213	1	171113917	171126967	+	nonsense_mediated_decay;protein_coding	NA	FALSE	none	1698	110	NA	protein_coding	0.916462	0	1.77598	1.03142	2.08128	12.6922	3.72837	0.992745	0.952052	3.86301	no	NA	NA	NA	NA	NA	ENSMUSG00000026649	nonsense_mediated_decay,protein_coding	NA	NA	NA	NA
	XLOC_001214	1	171150710	171161130	+	protein_coding	NA	FALSE	none	2040	124	NA	protein_coding	0	1.16034	1.77598	3.09426	3.12191	0	0.932091	1.98549	4.76026	5.79451	no	mRNA	NA	NA	NA	NA	ENSMUSG00000056569	protein_coding	NA	NA	NA	NA
	XLOC_001215	1	171213969	171220701	+	nonsense_mediated_decay;protein_coding	NA	FALSE	none	3465	0	NA	protein_coding	1.83292	0	0.88799	3.09426	1.04064	0	0.932091	0	0	0	no	NA	NA	NA	NA	NA	ENSMUSG00000005677	nonsense_mediated_decay,protein_coding	NA	NA	NA	NA
	XLOC_001216	1	171221747	171226379	+	protein_coding	NA	FALSE	none	768	0	NA	protein_coding	255.693	142.722	144.742	63.948	33.3004	22.2113	312.251	49.6372	88.5409	21.2466	no	NA	NA	NA	NA	NA	ENSMUSG00000005681	protein_coding	13.0669	-0.209665	121.072	1.35249
	XLOC_001217	1	171250420	171260637	+	protein_coding	NA	FALSE	protein_coding	4810	508	1.09384	protein_coding	18.3292	22.0464	21.3117	35.0683	41.6255	39.1342	112.783	38.7171	69.4998	50.2191	no	mRNA	NA	NA	NA	NA	ENSMUSG00000006403	protein_coding	NA	NA	NA	NA
	XLOC_001218	1	171270327	171276896	+	protein_coding	NA	FALSE	protein_coding	2287	61	0.364327	protein_coding	269.44	239.03	250.413	293.955	236.225	322.593	315.979	284.918	297.04	325.459	yes	mRNA	5	267	18	119	ENSMUSG00000052423	protein_coding	33.358	0.064181	84.6504	0.367873
	XLOC_001219	1	171308046	171308137	+	snoRNA	NA	FALSE	none	91	0	NA	lncRNA	0	0	0	0	1.04064	0	0	0	0	0	no	NA	NA	NA	NA	NA	ENSMUSG00000087747	snoRNA	NA	NA	NA	NA
	XLOC_001220	1	171329144	171342331	+	protein_coding	NA	FALSE	protein_coding	3483	224	0.806934	protein_coding	223.617	184.494	284.157	252.698	333.004	286.632	222.77	191.6	218.972	207.637	yes	mRNA	1	45	11	114	ENSMUSG00000013973	protein_coding	NA	NA	10.346	-0.291409
	XLOC_001221	1	171345669	171359254	+	protein_coding	NA	FALSE	protein_coding	1797	579	7.75825	protein_coding	151.216	124.156	204.238	231.038	272.647	310.958	227.43	293.853	258.006	243.37	no	mRNA	NA	NA	NA	NA	ENSMUSG00000006412	protein_coding	48.3134	-0.64504	84.6017	-0.620619
	XLOC_001222	1	171370098	171388598	+	protein_coding	NA	FALSE	protein_coding	3746	220	NA	protein_coding	14.6634	27.8481	60.3833	51.571	24.9753	10.5768	3.72837	1.98549	7.61642	4.82876	no	mRNA	NA	NA	NA	NA	ENSMUSG00000006411	protein_coding	NA	NA	NA	NA
	XLOC_001223	1	171388953	171410240	+	protein_coding	NA	FALSE	protein_coding	4540	307	NA	protein_coding	79.7322	68.46	98.5668	45.3825	10.4064	8.46145	4.66046	5.95647	0.952052	2.89726	yes	mRNA	18	53	0	48	ENSMUSG00000048865	protein_coding	NA	NA	NA	NA
	XLOC_001224	1	171411151	171420352	+	protein_coding;nonsense_mediated_decay	NA	FALSE	none	3189	37	0.512002	protein_coding	1199.65	829.643	1584.17	1496.59	940.737	956.144	590.946	578.77	613.122	729.143	no	NA	NA	NA	NA	NA	NA	NA	NA	NA	NA	NA
	XLOC_001225	1	171437259	171464603	+	protein_coding	NA	FALSE	protein_coding	2793	63	1.75024	protein_coding	551.71	516.351	775.215	934.466	781.519	994.22	1393.48	1203.21	1089.15	797.711	yes	mRNA	37	357	22	295	ENSMUSG00000038235	protein_coding	61.4096	0.112919	220.808	0.257969
	XLOC_001226	1	171469041	171469522	+	NA	NA	FALSE	none	481	67	NA	lncRNA	0	0	0	0	0	2.11536	1.86418	7.94196	1.9041	0	no	NA	NA	NA	NA	NA	NA	NA	NA	NA	NA	NA
	XLOC_001227	1	171503477	171504750	+	protein_coding	NA	FALSE	protein_coding	1273	59	1.08984	protein_coding	26.5774	20.8861	23.9757	25.7855	16.6502	10.5768	29.8269	25.8114	31.4177	39.5958	no	mRNA	NA	NA	NA	NA	ENSMUSG00000060244	protein_coding	NA	NA	NA	NA
	XLOC_001228	1	171515232	171516922	+	protein_coding	NA	FALSE	none	321	0	NA	lncRNA	0	0	0	0	0	0	0	0	0	0	no	NA	NA	NA	NA	NA	ENSMUSG00000038218	protein_coding	NA	NA	NA	NA
	XLOC_001229	1	171559192	171585318	+	protein_coding	NA	FALSE	none	3760	625	NA	protein_coding	0.916462	0	0	1.03142	0	0	0	0	0	0	no	NA	NA	NA	NA	NA	ENSMUSG00000004709	protein_coding	NA	NA	10.0886	0.687635
	XLOC_001230	1	171682008	171705258	+	protein_coding	NA	FALSE	none	1189	33	NA	protein_coding	0	0	0	0	0	0	0	0	0	0	no	NA	NA	NA	NA	NA	ENSMUSG00000015355	protein_coding	NA	NA	NA	NA
	XLOC_001231	1	171711076	171711500	+	processed_pseudogene	NA	FALSE	none	424	0	0.639175	lncRNA	32.9926	26.6878	51.5034	40.2254	20.8128	29.6151	20.506	24.8186	17.1369	15.452	no	NA	NA	NA	NA	NA	ENSMUSG00000059058	processed_pseudogene	NA	NA	NA	NA
	XLOC_001232	1	171767126	171801184	+	protein_coding	NA	FALSE	none	2693	48	NA	protein_coding	0	0	0	2.06284	0	0	0	0	0	0	no	NA	NA	NA	NA	NA	ENSMUSG00000015316	protein_coding	NA	NA	NA	NA
	XLOC_001233	1	171839696	171890718	+	protein_coding	NA	FALSE	none	6272	4191	NA	protein_coding	0	3.48102	2.66397	3.09426	13.5283	6.34609	5.59255	12.9057	1.9041	6.76027	no	NA	NA	NA	NA	NA	ENSMUSG00000038147	protein_coding	NA	NA	NA	NA
	XLOC_001234	1	171895663	171898237	+	protein_coding	NA	FALSE	none	2574	1010	NA	lncRNA	0	0	0	0	0	0	0	0	0	0	no	NA	NA	NA	NA	NA	ENSMUSG00000073492	protein_coding	NA	NA	NA	NA
	XLOC_001235	1	171898719	171903772	+	lncRNA	NA	FALSE	none	1554	466	NA	lncRNA	0	0	0	0	0	0	0	0	0	0	no	NA	NA	NA	NA	NA	Necsulea_CUFF.138631	Overlap	NA	NA	NA	NA
	XLOC_001236	1	171917536	171943868	+	protein_coding	NA	FALSE	none	2443	48	NA	protein_coding	0	0	0	0	0	0	0	0.992745	0	0	no	NA	NA	NA	NA	NA	ENSMUSG00000015314	protein_coding	NA	NA	NA	NA
	XLOC_001237	1	172082528	172122330	+	nonsense_mediated_decay;protein_coding	NA	FALSE	none	4823	0	1.4803	protein_coding	3269.02	3646.95	2982.76	3034.44	2228.01	2837.76	3595.08	2708.21	3372.17	3081.72	no	NA	NA	NA	NA	NA	ENSMUSG00000026553	nonsense_mediated_decay,protein_coding	162.687	0.153182	319.876	-0.0771629
	XLOC_001238	1	172126754	172136706	+	protein_coding	NA	FALSE	protein_coding	3340	277	1.34729	protein_coding	910.963	828.482	809.846	759.125	671.212	692.781	826.765	855.746	904.45	1019.83	yes	mRNA	53	488	24	204	ENSMUSG00000003464	protein_coding	128.094	0.0743384	273.803	-0.0198701
	XLOC_001239	1	172148014	172196752	+	protein_coding	NA	FALSE	protein_coding	4272	36	1.52778	protein_coding	1992.39	1847.26	1948.25	1742.07	2158.28	1845.65	1808.26	1783.96	1822.23	1960.48	yes	mRNA	55	944	230	642	ENSMUSG00000026554	protein_coding	88.5057	-0.146455	127.494	-0.174908
	XLOC_001240	1	172206850	172209978	+	protein_coding	NA	FALSE	protein_coding	3128	342	NA	lncRNA	0	1.16034	3.55196	4.12568	12.4877	4.23072	11.1851	29.7823	4.76026	23.1781	no	mRNA	NA	NA	NA	NA	ENSMUSG00000007122	protein_coding	NA	NA	NA	NA
	XLOC_001241	1	172211646	172216265	+	protein_coding	NA	FALSE	protein_coding	4619	538	NA	lncRNA	3.66585	8.12237	4.43995	5.1571	10.4064	12.6922	42.8762	54.601	12.3767	32.8356	no	mRNA	NA	NA	NA	NA	ENSMUSG00000007122	protein_coding	NA	NA	NA	NA
	XLOC_001242	1	172261640	172319842	+	protein_coding	NA	FALSE	protein_coding	3284	41	1.44982	protein_coding	769.828	960.761	737.919	735.402	1002.13	739.319	331.825	235.281	389.389	426.863	yes	mRNA	8	189	19	129	ENSMUSG00000038034	protein_coding	NA	NA	11.1181	-0.470824
	XLOC_001243	1	172341209	172374085	+	protein_coding	NA	FALSE	protein_coding	5407	663	NA	protein_coding	4.58231	4.64136	18.6478	22.6912	14.5689	15.8652	24.2344	20.8476	59.9793	59.8766	no	mRNA	NA	NA	NA	NA	ENSMUSG00000044708	protein_coding	NA	NA	NA	NA
	XLOC_001244	1	172376530	172384099	+	protein_coding	NA	FALSE	protein_coding	7569	2525	0.368486	protein_coding	516.884	466.456	589.625	598.223	722.203	785.857	861.252	1116.84	1022.5	1028.53	yes	mRNA	25	198	107	146	ENSMUSG00000050229	protein_coding	60.9373	0.186972	143.603	0.0381935
	XLOC_001245	1	172435348	172458607	+	lncRNA	NA	TRUE	none	83	44	NA	lncRNA	0	0	0	0	1.04064	0	0	0	0	0	no	NA	NA	NA	NA	NA	Guttman_lincRNA_434	TooShort	NA	NA	NA	NA
	XLOC_001246	1	172475357	172478575	+	protein_coding	NA	FALSE	protein_coding	1313	0	NA	protein_coding	3.66585	1.16034	7.10392	13.4085	1.04064	1.05768	0	0.992745	0.952052	1.9315	no	mRNA	NA	NA	NA	NA	ENSMUSG00000026548	protein_coding	NA	NA	NA	NA
	XLOC_001247	1	172481787	172498878	+	nonsense_mediated_decay;protein_coding	NA	FALSE	none	5299	148	NA	protein_coding	6.41523	20.8861	375.62	428.039	468.287	370.188	384.954	769.377	697.854	772.602	no	NA	NA	NA	NA	NA	ENSMUSG00000037995	nonsense_mediated_decay,protein_coding	NA	NA	22.9547	-0.341514
	XLOC_001248	1	172500046	172507435	+	protein_coding	NA	FALSE	protein_coding	1797	60	2.63359	protein_coding	1128.16	1313.5	711.28	778.722	613.976	1150.76	576.032	468.576	355.116	253.027	yes	mRNA	19	184	33	364	ENSMUSG00000026547	protein_coding	140.875	0.00140299	162.443	0.248912
	XLOC_001249	1	172521043	172545870	+	protein_coding	NA	FALSE	protein_coding	4036	1126	1.61011	protein_coding	80.6486	60.3376	21.3117	7.21994	8.3251	34.9035	1.86418	4.96372	4.76026	2.89726	no	mRNA	NA	NA	NA	NA	ENSMUSG00000026546	protein_coding	NA	NA	NA	NA
	XLOC_001250	1	172555937	172563717	+	protein_coding	NA	FALSE	none	1879	143	0.350121	protein_coding	1.83292	2.32068	1.77598	0	0	2.11536	0	0	1.9041	0	no	NA	NA	NA	NA	NA	ENSMUSG00000049598	protein_coding	NA	NA	NA	NA
	XLOC_001251	1	172698055	172699966	+	protein_coding	NA	FALSE	protein_coding	1698	472	NA	protein_coding	0	0	0	0	0	0	0	0.992745	17.1369	20.2808	no	NA	NA	NA	NA	NA	ENSMUSG00000037942	protein_coding	NA	NA	NA	NA
	XLOC_001252	1	172813616	172814174	+	lncRNA	NA	TRUE	none	466	0	NA	lncRNA	0	0	0	0	0	0	0	0.992745	0	0	no	NA	NA	NA	NA	NA	Necsulea_Locus_81437	lncRNA	NA	NA	NA	NA
	XLOC_001253	1	172829606	172831582	+	lncRNA	NA	TRUE	none	341	265	NA	lncRNA	0	0	0	0	0	0	0	0	0	0	no	NA	NA	NA	NA	NA	Necsulea_CUFF.138796	lncRNA	NA	NA	NA	NA
	XLOC_001254	1	172956767	172957817	+	protein_coding	NA	FALSE	none	1050	0	NA	protein_coding	0	0	0	0	0	0	0	0	0	0	no	NA	NA	NA	NA	NA	ENSMUSG00000037924	protein_coding	NA	NA	NA	NA
	XLOC_001255	1	173150130	173150372	+	pseudogene	NA	FALSE	none	242	0	NA	lncRNA	0	0	0	0	0	0	0	0	0	0	no	NA	NA	NA	NA	NA	ENSMUSG00000066680	pseudogene	NA	NA	NA	NA
	XLOC_001256	1	173203357	173204299	+	protein_coding	NA	FALSE	none	942	0	NA	protein_coding	0	0	0	0	0	0	0	0	0	0	no	NA	NA	NA	NA	NA	ENSMUSG00000046643	protein_coding	NA	NA	NA	NA
	XLOC_001257	1	173215606	173216640	+	protein_coding	NA	FALSE	none	1034	0	NA	protein_coding	0	0	0	0	0	0	0	0	0	0	no	NA	NA	NA	NA	NA	ENSMUSG00000049456	protein_coding	NA	NA	NA	NA
	XLOC_001258	1	173270146	173271137	+	protein_coding	NA	FALSE	none	991	0	NA	protein_coding	0	0	0	0	0	0	0	0	0	0	no	NA	NA	NA	NA	NA	ENSMUSG00000049605	protein_coding	NA	NA	NA	NA
	XLOC_001259	1	173350183	173466040	+	protein_coding	NA	FALSE	protein_coding	4850	1021	1.87142	protein_coding	1941.07	1614.03	776.991	834.419	270.566	142.787	60.5859	70.4849	32.3698	56.9794	yes	mRNA	NA	NA	NA	NA	ENSMUSG00000037860	protein_coding	41.3156	-0.0486638	NA	NA
	XLOC_001260	1	173630858	173647928	+	protein_coding	NA	FALSE	none	3497	452	NA	protein_coding	0	0	3.55196	8.25136	2.08128	1.05768	0	0	0	0	no	mRNA	NA	NA	NA	NA	ENSMUSG00000043263	protein_coding	NA	NA	NA	NA
	XLOC_001261	1	173673679	173698392	+	protein_coding	NA	FALSE	none	2987	1442	NA	protein_coding	0	0	0	0	0	1.05768	0	0	0	0	no	NA	NA	NA	NA	NA	ENSMUSG00000066677	protein_coding	NA	NA	NA	NA
	XLOC_001262	1	174041932	174042936	+	protein_coding	NA	FALSE	none	1004	0	NA	protein_coding	0	0	0	0	0	0	0	0	0	0	no	NA	NA	NA	NA	NA	ENSMUSG00000045381	protein_coding	NA	NA	NA	NA
	XLOC_001263	1	174050374	174051313	+	protein_coding	NA	FALSE	none	939	0	NA	protein_coding	0	0	0	0	0	0	0	0	0	0	no	NA	NA	NA	NA	NA	ENSMUSG00000047048	protein_coding	NA	NA	NA	NA
	XLOC_001264	1	174069299	174070253	+	protein_coding	NA	FALSE	none	954	0	NA	protein_coding	0	0	0	0	0	0	0	0	0	0	no	NA	NA	NA	NA	NA	ENSMUSG00000050134	protein_coding	NA	NA	NA	NA
	XLOC_001265	1	174089037	174089980	+	protein_coding	NA	FALSE	none	943	0	NA	protein_coding	0	0	0	0	0	0	0	0	0	0	no	NA	NA	NA	NA	NA	ENSMUSG00000049528	protein_coding	NA	NA	NA	NA
	XLOC_001266	1	174099459	174100407	+	protein_coding	NA	FALSE	none	948	0	NA	protein_coding	0	0	0	0	0	0	0	0	0	0.965752	no	NA	NA	NA	NA	NA	ENSMUSG00000059371	protein_coding	NA	NA	NA	NA
	XLOC_001267	1	174136745	174137693	+	protein_coding	NA	FALSE	none	948	0	NA	protein_coding	0	0	0	0	0	0	0	0	0	0	no	NA	NA	NA	NA	NA	ENSMUSG00000051528	protein_coding	NA	NA	NA	NA
	XLOC_001268	1	174151480	174152530	+	polymorphic_pseudogene;protein_coding	NA	FALSE	none	1050	0	NA	protein_coding	0	0	0	0	0	0	0	0	0	0	no	NA	NA	NA	NA	NA	ENSMUSG00000091950	polymorphic_pseudogene,protein_coding	NA	NA	NA	NA
	XLOC_001269	1	174158721	174159767	+	protein_coding	NA	FALSE	none	1046	0	NA	protein_coding	0	0	0	0	0	0	0	0	0	0	no	NA	NA	NA	NA	NA	ENSMUSG00000055033	protein_coding	NA	NA	NA	NA
	XLOC_001270	1	174172687	174248450	+	protein_coding	NA	FALSE	protein_coding	8521	99	NA	lncRNA	169.545	49.8946	1795.51	2659	775.275	679.031	10.253	31.7678	5.71231	14.4863	no	mRNA	NA	NA	NA	NA	ENSMUSG00000026532	protein_coding	86.6664	0.430352	NA	NA
	XLOC_001271	1	174330517	174332873	+	protein_coding	NA	FALSE	none	799	0	NA	protein_coding	0	0	0	0	0	0	0	0	0	0	no	NA	NA	NA	NA	NA	ENSMUSG00000026531	protein_coding	NA	NA	NA	NA
	XLOC_001272	1	174368918	174369848	+	protein_coding	NA	FALSE	none	930	0	NA	protein_coding	0	0	0	0	0	0	0	0	0	0	no	NA	NA	NA	NA	NA	ENSMUSG00000066672	protein_coding	NA	NA	NA	NA
	XLOC_001273	1	174391045	174392055	+	protein_coding	NA	FALSE	none	1010	0	NA	protein_coding	0	0	0	0	0	0	0	0	0	0	no	NA	NA	NA	NA	NA	ENSMUSG00000059503	protein_coding	NA	NA	NA	NA
	XLOC_001274	1	174430429	174431384	+	protein_coding	NA	FALSE	none	955	0	NA	protein_coding	0	0	0	0	0	0	0	0	0	0	no	NA	NA	NA	NA	NA	ENSMUSG00000051509	protein_coding	NA	NA	NA	NA
	XLOC_001275	1	174448624	174449602	+	protein_coding	NA	FALSE	none	978	0	NA	protein_coding	0	0	0	0	0	0	0	0	0	0.965752	no	NA	NA	NA	NA	NA	ENSMUSG00000066671	protein_coding	NA	NA	NA	NA
	XLOC_001276	1	174501727	174822717	+	protein_coding	NA	FALSE	protein_coding	6843	250	NA	protein_coding	157.631	225.106	300.14	257.855	262.241	134.325	123.036	241.237	339.883	399.821	yes	mRNA	10	413	14	193	ENSMUSG00000028354	protein_coding	22.9395	-0.0361492	NA	NA
	XLOC_001277	1	175576424	175578054	+	lncRNA	NA	TRUE	none	474	474	NA	lncRNA	0	0	0	0	0	0	0	0	0	0	no	NA	NA	NA	NA	NA	Necsulea_CUFF.138981	lncRNA	NA	NA	NA	NA
	XLOC_001278	1	175620380	175662116	+	nonsense_mediated_decay;protein_coding	NA	FALSE	none	4146	1045	NA	protein_coding	0	0	0.88799	1.03142	0	0	0	0	0	0	no	NA	NA	NA	NA	NA	ENSMUSG00000039783	nonsense_mediated_decay,protein_coding	NA	NA	NA	NA
	XLOC_001279	1	175698592	175815734	+	protein_coding	snRNA	FALSE	none	3853	0	NA	protein_coding	11.914	5.8017	0	1.03142	1.04064	1.05768	0	0	0	0	no	NA	NA	NA	NA	NA	ENSMUSG00000026523	protein_coding	NA	NA	NA	NA
	XLOC_001280	1	175800513	175800689	+	snRNA	protein_coding	FALSE	none	176	173	NA	lncRNA	0	0	0	0	0	0	0	0	0	0	no	NA	NA	NA	NA	NA	ENSMUSG00000077794	snRNA	NA	NA	NA	NA
	XLOC_001281	1	175880555	175914049	+	protein_coding	snRNA	FALSE	none	8535	1897	0.892628	protein_coding	1926.4	1533.97	1724.48	1551.26	1118.69	1101.05	1026.23	1086.06	833.998	861.451	no	NA	NA	NA	NA	NA	ENSMUSG00000039748	protein_coding	162.119	-0.0334716	137.64	-0.136831
	XLOC_001282	1	175904544	175904651	+	snRNA	protein_coding	FALSE	none	107	107	0.0317521	lncRNA	0	1.16034	0	1.03142	0	0	1.86418	0.992745	0	0	no	NA	NA	NA	NA	NA	ENSMUSG00000094820	snRNA	NA	NA	NA	NA
	XLOC_001283	1	175915209	175917164	+	NA	NA	FALSE	none	1955	324	NA	lncRNA	0	3.48102	0.88799	0	4.16255	10.5768	13.9814	2.97823	8.56847	6.76027	no	NA	NA	NA	NA	NA	NA	NA	NA	NA	NA	NA
	XLOC_001284	1	176700616	176700724	+	snRNA	NA	FALSE	none	108	108	0.0737945	lncRNA	0	0	0	0	0	0	0	0	0	0	no	NA	NA	NA	NA	NA	ENSMUSG00000087875	snRNA	NA	NA	NA	NA
	XLOC_001285	1	176814659	177020437	+	nonsense_mediated_decay;protein_coding	miRNA	FALSE	none	3147	228	0.773022	protein_coding	72.4005	68.46	57.7193	48.4767	57.2351	59.2301	83.8882	95.3035	125.671	129.411	no	NA	NA	NA	NA	NA	ENSMUSG00000026504	nonsense_mediated_decay,protein_coding	NA	NA	17.5682	-0.0924247
	XLOC_001286	1	176879833	176879913	+	miRNA	nonsense_mediated_decay;protein_coding	FALSE	none	80	0	NA	lncRNA	0	0	0	0	0	0	0.932091	1.98549	0.952052	0	no	NA	NA	NA	NA	NA	ENSMUSG00000093132	miRNA	NA	NA	NA	NA
	XLOC_001287	1	177260495	177261123	+	NA	NA	FALSE	none	628	0	NA	lncRNA	0	0	0	0	3.12191	8.46145	4.66046	2.97823	7.61642	3.86301	no	NA	NA	NA	NA	NA	NA	NA	NA	NA	NA	NA
	XLOC_001288	1	177262233	177263790	+	NA	NA	FALSE	none	1557	552	NA	lncRNA	0	0	0	0	1.04064	4.23072	2.79627	2.97823	10.4726	11.589	no	NA	NA	NA	NA	NA	NA	NA	NA	NA	NA	NA
	XLOC_001289	1	177410916	177411198	+	lncRNA	NA	TRUE	none	235	0	NA	lncRNA	0	0	0	0	0	0	0	0	0	0	no	NA	NA	NA	NA	NA	Necsulea_blastnPlatypus.Locus_66560	lncRNA	NA	NA	NA	NA
	XLOC_001290	1	177442240	177451018	+	protein_coding	NA	FALSE	protein_coding	8743	298	0.107355	protein_coding	372.083	379.431	245.085	256.824	441.231	408.265	626.365	851.775	1603.26	1843.62	yes	mRNA	10	138	10	60	ENSMUSG00000063659	protein_coding	NA	NA	68.906	0.0621904
	XLOC_001291	1	177729813	177753324	+	protein_coding	NA	FALSE	none	768	27	NA	protein_coding	0	0	0	1.03142	0	0	0	0	0	0	no	NA	NA	NA	NA	NA	ENSMUSG00000015962	protein_coding	NA	NA	NA	NA
	XLOC_001292	1	177786855	177787465	+	processed_pseudogene	NA	FALSE	none	610	0	0.0617887	lncRNA	0	0	0	0	0	1.05768	0	0	0	0	no	NA	NA	NA	NA	NA	ENSMUSG00000089657	processed_pseudogene	NA	NA	NA	NA
	XLOC_001293	1	177983260	177989547	+	NA	NA	FALSE	none	6287	2818	0.68934	lncRNA	76.9828	76.5824	32.8556	24.7541	58.2757	37.0188	41.9441	61.5502	89.4929	96.5752	no	lncRNA	NA	NA	NA	NA	NA	NA	NA	NA	NA	NA
	XLOC_001294	1	177991434	178048291	+	protein_coding	NA	FALSE	none	1663	260	NA	lncRNA	0	1.16034	0	0	1.04064	2.11536	1.86418	1.98549	0.952052	1.9315	no	NA	NA	NA	NA	NA	ENSMUSG00000091476	protein_coding	NA	NA	NA	NA
	XLOC_001295	1	178187416	178252598	+	protein_coding	NA	FALSE	protein_coding	4453	210	0.225356	protein_coding	950.371	982.807	957.253	1015.95	802.332	1049.22	992.677	798.167	940.628	856.622	yes	mRNA	19	94	6	88	ENSMUSG00000026502	protein_coding	43.0687	0.100861	95.49	-0.0692561
	XLOC_001296	1	178256102	178257295	+	protein_coding	NA	FALSE	none	1193	487	NA	lncRNA	0	1.16034	0.88799	0	2.08128	3.17304	1.86418	4.96372	2.85616	2.89726	no	NA	NA	NA	NA	NA	ENSMUSG00000055831	protein_coding	NA	NA	NA	NA
	XLOC_001297	1	178319129	178322693	+	protein_coding	NA	FALSE	none	471	0	1.49922	protein_coding	87.9803	52.2153	80.807	61.8852	66.6008	74.0377	48.4688	62.5429	75.2121	84.0205	no	NA	NA	NA	NA	NA	ENSMUSG00000026500	protein_coding	37.2173	0.456188	74.3417	0.0302006
	XLOC_001298	1	178338099	178338867	+	NA	NA	FALSE	none	768	102	NA	lncRNA	2.74938	2.32068	2.66397	7.21994	3.12191	2.11536	1.86418	9.92745	9.52052	7.72602	no	NA	NA	NA	NA	NA	NA	NA	NA	NA	NA	NA
	XLOC_001299	1	178390818	178390924	+	snRNA	NA	FALSE	none	106	104	NA	lncRNA	0	0	0	0	0	0	0	0	0.952052	0	no	NA	NA	NA	NA	NA	ENSMUSG00000064954	snRNA	NA	NA	NA	NA
	XLOC_001300	1	178405775	178487989	+	protein_coding	NA	FALSE	protein_coding	7383	1533	0.531857	protein_coding	50.4054	26.6878	75.4791	63.948	69.7228	49.711	76.4315	60.5574	77.1162	83.0547	yes	mRNA	11	69	102	261	ENSMUSG00000026495	protein_coding	10.992	0.287627	NA	NA
	XLOC_001301	1	178488442	178489244	+	NA	NA	TRUE	none	802	104	NA	lncRNA	0	1.16034	0.88799	0	7.28447	3.17304	1.86418	1.98549	1.9041	8.69177	no	NA	NA	NA	NA	NA	NA	NA	NA	NA	NA	NA
	XLOC_001302	1	178513303	178515304	+	lncRNA	NA	TRUE	none	1149	537	NA	lncRNA	0	0	0	0	0	0	0.932091	0	1.9041	0	no	NA	NA	NA	NA	NA	Necsulea_CUFF.139370	lncRNA	NA	NA	NA	NA
	XLOC_001303	1	178528478	178933953	+	protein_coding	snRNA	FALSE	none	9564	119	0.610979	protein_coding	23.828	39.4515	18.6478	12.377	11.447	135.383	148.203	151.89	147.568	186.39	no	NA	NA	NA	NA	NA	ENSMUSG00000026494	protein_coding	NA	NA	NA	NA
	XLOC_001304	1	178636904	178637071	+	snRNA	protein_coding	FALSE	none	167	166	0.009294	lncRNA	0	0	0	0	0	0	0	1.98549	0.952052	0.965752	no	NA	NA	NA	NA	NA	ENSMUSG00000064967	snRNA	NA	NA	NA	NA
	XLOC_001305	1	179538416	179538935	+	processed_pseudogene	NA	FALSE	none	519	0	NA	lncRNA	0	0	0	0	0	0	0	0	0	0	no	NA	NA	NA	NA	NA	ENSMUSG00000082395	processed_pseudogene	NA	NA	NA	NA
	XLOC_001306	1	179546322	179627520	+	protein_coding	NA	FALSE	protein_coding	4833	80	0.830808	protein_coding	344.59	377.11	264.621	268.169	185.234	191.44	250.733	281.94	402.718	412.376	no	mRNA	NA	NA	NA	NA	ENSMUSG00000038949	protein_coding	NA	NA	40.0083	0.383149
	XLOC_001307	1	179668209	179687189	+	nonsense_mediated_decay;protein_coding	NA	FALSE	none	2123	0	1.05963	protein_coding	200.705	196.097	199.798	194.938	248.712	569.032	455.793	373.272	448.417	493.499	no	NA	NA	NA	NA	NA	ENSMUSG00000038936	nonsense_mediated_decay,protein_coding	18.0079	0.326468	61.378	-0.0449099
	XLOC_001308	1	179803375	179804676	+	protein_coding	NA	FALSE	protein_coding	1301	0	NA	lncRNA	7.33169	1.16034	2.66397	9.28278	6.24383	8.46145	10.253	2.97823	11.4246	4.82876	no	mRNA	NA	NA	NA	NA	ENSMUSG00000073486	protein_coding	NA	NA	NA	NA
	XLOC_001309	1	179959606	180165603	+	protein_coding	NA	FALSE	protein_coding	11137	658	0.323394	protein_coding	610.363	630.064	685.528	721.994	730.528	738.261	766.179	1071.17	841.614	1024.66	yes	mRNA	17	581	30	132	ENSMUSG00000026490	protein_coding	157.015	0.231394	159.797	0.169524
	XLOC_001310	1	180278497	180280672	+	lncRNA	NA	TRUE	none	799	133	NA	lncRNA	0.916462	0	0	0	0	0	0	0	1.9041	0	no	NA	NA	NA	NA	NA	Necsulea_CUFF.139519	lncRNA	NA	NA	NA	NA
	XLOC_001311	1	180330484	180424802	+	protein_coding	NA	FALSE	protein_coding	6235	142	1.02536	protein_coding	43.9902	117.194	32.8556	76.3251	66.6008	124.806	120.24	198.549	173.274	272.342	yes	mRNA	11	192	6	51	ENSMUSG00000038855	protein_coding	NA	NA	NA	NA
	XLOC_001312	1	180568954	180601253	+	miRNA;protein_coding	NA	FALSE	none	3906	0	1.54261	protein_coding	14955.7	13543.5	13173.3	10580.3	7129.41	7678.76	5599.07	5196.03	4811.67	5128.15	no	NA	NA	NA	NA	NA	NA	NA	NA	NA	NA	NA
	XLOC_001313	1	180604173	180607557	+	NA	NA	FALSE	none	3384	1174	NA	lncRNA	11.914	9.28271	9.76789	7.21994	28.0972	12.6922	22.3702	23.8259	10.4726	17.3835	no	lncRNA	NA	NA	NA	NA	NA	NA	NA	NA	NA	NA
	XLOC_001314	1	180627963	180636280	+	lncRNA	NA	FALSE	none	1076	718	NA	lncRNA	0	0	0	0	0	0	0	0	0	0	no	NA	NA	NA	NA	NA	Necsulea_Locus_80647	Overlap	NA	NA	NA	NA
	XLOC_001315	1	180640966	180690670	+	protein_coding	NA	FALSE	protein_coding	3870	235	0.886548	protein_coding	482.059	381.752	442.219	388.845	274.728	344.804	299.201	287.896	295.136	322.561	no	mRNA	NA	NA	NA	NA	ENSMUSG00000058729	protein_coding	38.9558	-0.130185	50.1976	0.357619
	XLOC_001316	1	180726020	180759083	+	protein_coding	NA	FALSE	protein_coding	8400	2008	1.3907	protein_coding	862.39	865.613	549.666	546.652	626.464	633.551	796.006	712.791	935.867	780.328	yes	mRNA	13	495	11	197	ENSMUSG00000026499	protein_coding	38.0206	0.416505	183.246	0.102395
	XLOC_001317	1	180778790	180779447	+	NA	NA	TRUE	none	657	302	NA	lncRNA	3.66585	0	0	0	5.20319	0	3.72837	0.992745	4.76026	0	no	NA	NA	NA	NA	NA	NA	NA	NA	NA	NA	NA
	XLOC_001318	1	180813975	180820214	+	NA	NA	FALSE	none	6239	2660	0.112783	lncRNA	16.4963	31.3292	11.5439	15.4713	42.6662	35.9612	81.0919	70.4849	104.726	76.2944	no	lncRNA	NA	NA	NA	NA	NA	NA	NA	NA	NA	NA
	XLOC_001319	1	180832768	180832876	+	snRNA	NA	FALSE	none	108	106	NA	lncRNA	0	0	0	0	0	0	0	0	0	0.965752	no	NA	NA	NA	NA	NA	ENSMUSG00000084558	snRNA	NA	NA	NA	NA
	XLOC_001320	1	180851150	180868097	+	protein_coding	NA	FALSE	protein_coding	3173	375	1.58683	protein_coding	1216.14	910.866	946.597	837.513	508.872	680.089	460.453	494.387	448.417	496.397	yes	mRNA	44	542	6	174	ENSMUSG00000038806	protein_coding	101.075	-0.197442	117.17	-0.393381
	XLOC_001321	1	180888904	180890635	+	NA	NA	FALSE	none	1731	293	NA	lncRNA	16.4963	2.32068	12.4319	21.6598	1.04064	12.6922	0.932091	1.98549	0	0.965752	no	lncRNA	NA	NA	NA	NA	NA	NA	NA	NA	NA	NA
	XLOC_001322	1	180893107	180899103	+	protein_coding	NA	FALSE	protein_coding	2473	0	NA	protein_coding	4898.49	2620.05	498.162	1090.21	520.319	694.896	32.6232	77.4341	5.71231	54.0821	no	mRNA	NA	NA	NA	NA	ENSMUSG00000066652	protein_coding	27.4458	0.515434	NA	NA
	XLOC_001323	1	180904273	180908087	+	protein_coding	NA	FALSE	protein_coding	1598	26	1.47991	protein_coding	1698.2	1160.34	1162.38	1808.08	681.618	1126.43	508.922	366.323	485.547	507.986	yes	mRNA	25	291	108	228	ENSMUSG00000026520	protein_coding	44.5591	0.024911	29.1754	-0.348485
	XLOC_001324	1	180925144	180927324	+	NA	NA	TRUE	lincRNA	2180	522	NA	lncRNA	4.58231	3.48102	6.21593	6.18852	0	12.6922	0	0.992745	1.9041	0	no	lncRNA	NA	NA	NA	NA	NA	NA	NA	NA	NA	NA
	XLOC_001325	1	180935021	180938400	+	protein_coding	NA	FALSE	protein_coding	1620	0	NA	protein_coding	736.835	105.591	591.401	1395.51	315.313	395.573	17.7097	87.3616	0.952052	43.4589	yes	mRNA	16	199	43	186	ENSMUSG00000038793	protein_coding	37.007	1.28622	NA	NA
	XLOC_001326	1	180942225	180976045	+	nonsense_mediated_decay;protein_coding	NA	FALSE	none	5198	45	1.81131	protein_coding	69.6511	67.2997	81.695	159.87	191.477	383.938	79.2278	62.5429	58.0752	54.0821	no	NA	NA	NA	NA	NA	ENSMUSG00000026519	nonsense_mediated_decay,protein_coding	NA	NA	16.6946	0.0393413
	XLOC_001327	1	181051236	181060667	+	protein_coding	NA	FALSE	none	1898	758	NA	protein_coding	0.916462	0	0	0	0	1.05768	0	0	0	0	no	NA	NA	NA	NA	NA	ENSMUSG00000038768	protein_coding	NA	NA	NA	NA
	XLOC_001328	1	181144227	181170197	+	protein_coding	NA	FALSE	protein_coding	11980	4205	1.79742	protein_coding	639.69	721.731	496.386	505.396	429.784	478.072	543.409	502.329	581.704	532.13	yes	mRNA	21	339	27	316	ENSMUSG00000062169	protein_coding	73.3049	-0.616587	155.908	-0.502661
	XLOC_001329	1	181212249	181214290	+	NA	NA	FALSE	none	2041	77	NA	lncRNA	4.58231	8.12237	2.66397	1.03142	16.6502	7.40377	12.1172	20.8476	25.7054	24.1438	no	lncRNA	NA	NA	NA	NA	NA	NA	NA	NA	NA	NA
	XLOC_001330	1	181217388	181219230	+	NA	NA	TRUE	lincRNA	1842	699	NA	lncRNA	1.83292	1.16034	0	4.12568	15.6096	3.17304	2.79627	6.94921	7.61642	7.72602	no	NA	NA	NA	NA	NA	NA	NA	NA	NA	NA	NA
	XLOC_001331	1	181225985	181228498	+	lncRNA	NA	TRUE	none	2513	565	NA	lncRNA	0.916462	2.32068	0	0	10.4064	2.11536	2.79627	9.92745	5.71231	7.72602	no	NA	NA	NA	NA	NA	Ensembl_ENSMUSG00000054135|Guttman_lincRNA_446|Guttman_lincRNA_447	lncRNA	NA	NA	NA	NA
	XLOC_001332	1	181233917	181235010	+	NA	NA	TRUE	lincRNA	1093	0	NA	lncRNA	6.41523	1.16034	5.32794	2.06284	2.08128	0	0.932091	0	2.85616	0	no	lncRNA	NA	NA	NA	NA	NA	NA	NA	NA	NA	NA
	XLOC_001333	1	181251291	181254596	+	NA	NA	TRUE	lincRNA	3305	1442	0.160903	lncRNA	32.9926	47.5739	17.7598	13.4085	27.0566	7.40377	8.38882	4.96372	3.80821	0	yes	lncRNA	4	118	7	16	NA	NA	NA	NA	NA	NA
	XLOC_001334	1	181255851	181256857	+	NA	NA	TRUE	lincRNA	1006	27	NA	lncRNA	0.916462	6.96204	0.88799	1.03142	2.08128	0	1.86418	1.98549	0.952052	0.965752	no	NA	NA	NA	NA	NA	NA	NA	NA	NA	NA	NA
	XLOC_001335	1	181285767	181295881	+	lncRNA	NA	TRUE	none	369	0	NA	lncRNA	0.916462	0	0	0	0	0	0.932091	0	0	0	no	NA	NA	NA	NA	NA	Necsulea_Locus_80423	lncRNA	NA	NA	NA	NA
	XLOC_001336	1	181352503	181460742	+	protein_coding	NA	FALSE	none	2952	229	NA	protein_coding	0	2.32068	2.66397	8.25136	8.3251	11.6345	13.9814	13.8984	12.3767	14.4863	no	mRNA	NA	NA	NA	NA	ENSMUSG00000026514	protein_coding	NA	NA	NA	NA
	XLOC_001337	1	181641438	181643576	+	lncRNA	NA	TRUE	none	84	0	NA	lncRNA	0	0	0	0	0	0	0	0	0	0	no	NA	NA	NA	NA	NA	Guttman_lincRNA_448|Guttman_lincRNA_449	TooShort	NA	NA	NA	NA
	XLOC_001338	1	181741035	181769674	+	protein_coding	NA	FALSE	none	1986	0	NA	protein_coding	0	0	0.88799	1.03142	0	0	0	0	0	0	no	NA	NA	NA	NA	NA	ENSMUSG00000047369	protein_coding	NA	NA	NA	NA
	XLOC_001339	1	182020133	182030169	+	lncRNA	NA	FALSE	none	2639	965	0.100953	lncRNA	69.6511	40.6119	71.0392	33.0054	12.4877	7.40377	19.5739	14.8912	14.2808	17.3835	no	lncRNA	NA	NA	NA	NA	Guttman_lincRNA_451	lncRNA	16.1723	-0.0617028	25.7462	0.936333
	XLOC_001340	1	182020676	182022349	+	NA	lncRNA	FALSE	none	1673	117	NA	lncRNA	1.83292	4.64136	1.77598	6.18852	1.04064	7.40377	8.38882	12.9057	16.1849	12.5548	no	lncRNA	NA	NA	NA	NA	NA	NA	NA	NA	NA	NA
	XLOC_001341	1	182124736	182132407	+	protein_coding	NA	FALSE	protein_coding	1380	0	0.400484	lncRNA	703.842	587.132	647.344	624.009	349.654	466.437	375.633	347.461	365.588	382.438	yes	mRNA	2	69	14	172	ENSMUSG00000026511	protein_coding	42.4177	-0.265554	51.0271	-0.128476
	XLOC_001342	1	182409164	182462433	+	protein_coding	NA	FALSE	protein_coding	5786	313	1.38165	protein_coding	208.953	264.557	352.532	379.562	556.741	584.898	488.416	632.379	493.163	552.41	yes	mRNA	8	289	9	154	ENSMUSG00000026510	protein_coding	37.3171	0.124228	76.545	-0.16281
	XLOC_001343	1	182565006	182632352	+	protein_coding	NA	FALSE	none	3705	226	NA	protein_coding	2.74938	1.16034	0.88799	0	1.04064	0	2.79627	0.992745	0	0	no	NA	NA	NA	NA	NA	ENSMUSG00000038599	protein_coding	NA	NA	NA	NA
	XLOC_001344	1	182764011	182896598	+	protein_coding	NA	FALSE	protein_coding	3375	78	NA	protein_coding	24.7445	23.2068	47.9514	58.7909	138.405	141.729	144.474	120.122	148.52	107.199	yes	mRNA	0	123	4	62	ENSMUSG00000038576	protein_coding	NA	NA	30.8301	0.00477392
	XLOC_001345	1	182954787	182976044	+	protein_coding	NA	FALSE	none	3199	0	NA	protein_coding	0	0	7.99191	2.06284	1.04064	3.17304	5.59255	4.96372	2.85616	0.965752	no	mRNA	NA	NA	NA	NA	ENSMUSG00000079164	protein_coding	NA	NA	NA	NA
	XLOC_001346	1	183297057	183325455	+	protein_coding	NA	FALSE	protein_coding	4249	545	0.296169	protein_coding	450.899	336.498	277.941	288.798	259.119	286.632	370.04	416.953	359.876	451.972	no	mRNA	NA	NA	NA	NA	ENSMUSG00000042901	protein_coding	NA	NA	47.2045	0.0917295
	XLOC_001347	1	183388980	183413792	+	protein_coding	NA	FALSE	protein_coding	6831	1559	2.2511	protein_coding	167.712	93.9875	221.109	225.881	206.046	207.305	173.369	227.339	176.13	179.63	yes	mRNA	3	207	9	149	ENSMUSG00000072258	protein_coding	21.4713	0.114682	24.3014	0.0277402
	XLOC_001348	1	183418502	183437053	+	protein_coding	NA	FALSE	none	2736	0	NA	protein_coding	2.74938	0	0.88799	0	0	0	0	1.98549	0	1.9315	no	NA	NA	NA	NA	NA	ENSMUSG00000053461	protein_coding	NA	NA	NA	NA
	XLOC_001349	1	183553406	183563689	+	lncRNA	NA	TRUE	none	678	81	NA	lncRNA	0	0	0	0	0	0	0	0.992745	0	0	no	NA	NA	NA	NA	NA	Necsulea_Locus_80540	lncRNA	NA	NA	NA	NA
	XLOC_001350	1	183670386	183676734	+	lncRNA	NA	TRUE	none	239	113	NA	lncRNA	0	0	0	0	0	0	0	0	0	0	no	NA	NA	NA	NA	NA	Necsulea_Locus_80228	lncRNA	NA	NA	NA	NA
	XLOC_001351	1	183940245	183944372	+	lncRNA	NA	TRUE	none	550	0	NA	lncRNA	0	0	0	0	0	0	0	0	0	0	no	NA	NA	NA	NA	NA	Necsulea_Locus_80554	lncRNA	NA	NA	NA	NA
	XLOC_001352	1	184013301	184076126	+	protein_coding	NA	FALSE	protein_coding	3532	281	1.03563	protein_coding	61.4029	55.6963	30.1916	93.8592	63.4789	143.845	24.2344	48.6445	63.7875	93.678	yes	mRNA	0	40	4	48	ENSMUSG00000039384	protein_coding	NA	NA	NA	NA
	XLOC_001353	1	184178315	184178791	+	lncRNA	NA	TRUE	none	216	0	NA	lncRNA	0	0	0	0	0	0	0	0	0	0	no	NA	NA	NA	NA	NA	Necsulea_blastnHuman.Locus_120349	lncRNA	NA	NA	NA	NA
	XLOC_001354	1	184530502	184531219	+	lncRNA	NA	TRUE	none	332	0	NA	lncRNA	0	0	0	0	0	0	0	0	0	0	no	NA	NA	NA	NA	NA	Necsulea_Locus_81718|Necsulea_Locus_81907|Necsulea_Locus_80209	lncRNA	NA	NA	NA	NA
	XLOC_001355	1	184712496	184718989	+	lncRNA	NA	TRUE	none	1722	428	NA	lncRNA	0	0	0	0	0	0	0	0	0	0	no	NA	NA	NA	NA	NA	Ensembl_ENSMUSG00000092578	lncRNA	NA	NA	NA	NA
	XLOC_001356	1	184770860	184781536	+	lncRNA	NA	TRUE	none	835	11	NA	lncRNA	0	0	0	0	0	0	0	0	0	0	no	NA	NA	NA	NA	NA	Necsulea_Locus_80713	lncRNA	NA	NA	NA	NA
	XLOC_001357	1	184848374	184853220	+	NA	NA	FALSE	none	1210	300	NA	lncRNA	9.16462	3.48102	0	2.06284	0	0	0	0	0	0	no	NA	NA	NA	NA	NA	NA	NA	NA	NA	NA	NA
	XLOC_001358	1	184853362	184855071	+	NA	NA	TRUE	lincRNA	1709	366	NA	lncRNA	14.6634	6.96204	0	0	1.04064	1.05768	0.932091	0	1.9041	0	no	NA	NA	NA	NA	NA	NA	NA	NA	NA	NA	NA
	XLOC_001359	1	185057594	185066943	+	lncRNA	NA	TRUE	none	620	109	NA	lncRNA	0	0	0	0	0	0	0	0	0	0	no	NA	NA	NA	NA	NA	Necsulea_CUFF.140084	lncRNA	NA	NA	NA	NA
	XLOC_001360	1	185086104	185090225	+	lncRNA	NA	TRUE	none	289	125	NA	lncRNA	0	0	0	0	0	0	0	0	0	0	no	NA	NA	NA	NA	NA	Necsulea_Locus_81456|Necsulea_Locus_82695|Necsulea_Locus_80648	lncRNA	NA	NA	NA	NA
	XLOC_001361	1	185204100	185286743	+	protein_coding	snoRNA	FALSE	none	7052	0	1.49978	protein_coding	744.167	792.512	1515.8	1233.58	865.811	839.799	929.295	814.051	843.518	765.842	no	NA	NA	NA	NA	NA	ENSMUSG00000039318	protein_coding	65.2879	0.0152186	66.824	0.0145953
	XLOC_001362	1	185242906	185243038	+	snoRNA	protein_coding	FALSE	none	132	0	0.399584	lncRNA	0.916462	0	0.88799	1.03142	5.20319	0	0	3.97098	1.9041	0.965752	no	NA	NA	NA	NA	NA	ENSMUSG00000077571	snoRNA	NA	NA	NA	NA
	XLOC_001363	1	185313318	185313385	+	miRNA	NA	FALSE	none	67	0	NA	lncRNA	0	0	0	0	0	0	0	0	0	0	no	NA	NA	NA	NA	NA	ENSMUSG00000065581	miRNA	NA	NA	NA	NA
	XLOC_001364	1	185313580	185313692	+	miRNA	NA	FALSE	none	112	0	NA	lncRNA	0	0	0	0	0	0	0	0	0	0	no	NA	NA	NA	NA	NA	ENSMUSG00000065562	miRNA	NA	NA	NA	NA
	XLOC_001365	1	185331855	185357895	+	protein_coding	NA	FALSE	protein_coding	2714	498	1.90566	protein_coding	1478.25	877.216	1033.62	1021.11	539.051	579.609	449.268	348.453	327.506	320.63	yes	mRNA	20	124	5	80	ENSMUSG00000026617	protein_coding	121.174	-0.034343	77.5327	-0.131296
	XLOC_001366	1	185362974	185428355	+	protein_coding	NA	FALSE	protein_coding	4970	34	2.86703	protein_coding	11994.6	11739.2	9845.14	8331.81	5099.13	6158.88	5339.02	4815.81	5122.99	5324.19	yes	mRNA	94	1500	68	547	ENSMUSG00000026615	protein_coding	1232.38	-0.160359	1312.45	-0.0268238
	XLOC_001367	1	185454847	185468762	+	protein_coding	NA	FALSE	protein_coding	5874	537	NA	protein_coding	28.4103	40.6119	17.7598	23.7227	17.6908	10.5768	5.59255	3.97098	4.76026	7.72602	no	mRNA	NA	NA	NA	NA	ENSMUSG00000026614	protein_coding	NA	NA	NA	NA
	XLOC_001368	1	185487341	185498355	+	NA	NA	TRUE	lincRNA	1308	55	NA	lncRNA	23.828	6.96204	15.9838	10.3142	2.08128	6.34609	0	0	0	0	no	lncRNA	NA	NA	NA	NA	NA	NA	NA	NA	NA	NA
	XLOC_001369	1	185500312	185501872	+	lncRNA	NA	TRUE	none	340	0	NA	lncRNA	0	0	0	0	0	0	0	0	0	0	no	NA	NA	NA	NA	NA	Necsulea_Locus_81035	lncRNA	NA	NA	NA	NA
	XLOC_001370	1	185534393	185574809	+	lncRNA	NA	TRUE	none	713	0	NA	lncRNA	0	0	0	0	0	0	0	0	0	0	no	NA	NA	NA	NA	NA	Necsulea_Locus_80496	lncRNA	NA	NA	NA	NA
	XLOC_001371	1	185641739	185643963	+	lncRNA	NA	TRUE	none	379	0	NA	lncRNA	0	0	0	0	0	0	0	0	0	0.965752	no	NA	NA	NA	NA	NA	Necsulea_Locus_81121	lncRNA	NA	NA	NA	NA
	XLOC_001372	1	186123200	186123306	+	rRNA	NA	FALSE	none	106	102	NA	lncRNA	0	0	0	0	0	0	0	0	0	0	no	NA	NA	NA	NA	NA	ENSMUSG00000089363	rRNA	NA	NA	NA	NA
	XLOC_001373	1	186413422	186413541	+	lncRNA	NA	TRUE	none	119	0	NA	lncRNA	0	0	0	0	0	0	0	0	0	0	no	NA	NA	NA	NA	NA	Necsulea_blastnMacaque.Locus_189655	TooShort	NA	NA	NA	NA
	XLOC_001374	1	186587242	186617165	+	lncRNA	NA	TRUE	none	5540	803	NA	lncRNA	0	0	0	2.06284	0	2.11536	0.932091	0	0.952052	0	no	NA	NA	NA	NA	NA	Necsulea_Locus_80708	lncRNA	NA	NA	NA	NA
	XLOC_001375	1	186676741	186676876	+	snoRNA	NA	FALSE	none	135	0	NA	lncRNA	0	0	0	0	0	0	0	0	0	0	no	NA	NA	NA	NA	NA	ENSMUSG00000089045	snoRNA	NA	NA	NA	NA
	XLOC_001376	1	186749395	186752921	+	lncRNA	NA	FALSE	none	1275	408	NA	lncRNA	4.58231	6.96204	2.66397	3.09426	10.4064	7.40377	13.0493	22.8331	12.3767	12.5548	no	lncRNA	NA	NA	NA	NA	Ensembl_ENSMUSG00000097784|Necsulea_ENSMUSG00000090488	Overlap	NA	NA	NA	NA
	XLOC_001377	1	186800147	186817459	+	lncRNA	NA	TRUE	none	252	0	NA	lncRNA	0	0	0	0	0	0	0	0	0	0	no	NA	NA	NA	NA	NA	Necsulea_Locus_80395	lncRNA	NA	NA	NA	NA
	XLOC_001378	1	186922982	186930081	+	lncRNA	NA	TRUE	none	2109	462	NA	lncRNA	0	0	0.88799	3.09426	0	1.05768	0.932091	0	0.952052	0	no	NA	NA	NA	NA	NA	Necsulea_blastnOpossum.Locus_186980|Necsulea_Locus_80812	lncRNA	NA	NA	NA	NA
	XLOC_001379	1	186943685	186950446	+	lncRNA	NA	TRUE	none	646	330	NA	lncRNA	0	0	0	0	0	0	0	0	0	0	no	NA	NA	NA	NA	NA	Necsulea_Locus_80552	lncRNA	NA	NA	NA	NA
	XLOC_001380	1	186955899	186956722	+	lncRNA	NA	FALSE	none	613	0	NA	lncRNA	0	0	0	0	0	0	0	0	0	0	no	NA	NA	NA	NA	NA	Necsulea_CUFF.140188	Overlap	NA	NA	NA	NA
	XLOC_001381	1	186960507	186961513	+	processed_pseudogene	NA	FALSE	none	1006	0	2.3591	protein_coding	0	0	0.88799	0	0	0	0	0.992745	0	0	no	NA	NA	NA	NA	NA	ENSMUSG00000097935	processed_pseudogene	NA	NA	NA	NA
	XLOC_001382	1	186967415	186972576	+	protein_coding	NA	FALSE	protein_coding	3593	691	2.9786	protein_coding	250.194	102.11	539.898	313.552	122.795	129.037	30.759	46.659	15.2328	8.69177	yes	mRNA	4	105	21	78	ENSMUSG00000039224	protein_coding	44.1919	0.129883	NA	NA
	XLOC_001383	1	187215441	187369151	+	nonsense_mediated_decay;protein_coding	NA	FALSE	none	9236	1122	0.598623	protein_coding	419.739	431.646	443.107	369.248	531.766	491.822	494.941	593.661	508.396	535.027	no	NA	NA	NA	NA	NA	ENSMUSG00000039210	nonsense_mediated_decay,protein_coding	NA	NA	46.6996	-0.0957789
	XLOC_001384	1	187359232	187361468	+	NA	nonsense_mediated_decay;protein_coding	TRUE	none	2236	294	NA	lncRNA	1.83292	1.16034	0	0	7.28447	6.34609	4.66046	17.8694	6.66437	10.6233	no	NA	NA	NA	NA	NA	NA	NA	NA	NA	NA	NA
	XLOC_001385	1	187452441	187462781	+	lncRNA	NA	TRUE	none	958	194	NA	lncRNA	0	0	0	1.03142	0	0	0	0	0	2.89726	no	NA	NA	NA	NA	NA	Necsulea_Locus_81107	lncRNA	NA	NA	NA	NA
	XLOC_001386	1	187608604	188214885	+	protein_coding	NA	FALSE	protein_coding	5975	279	NA	protein_coding	0	1.16034	1.77598	3.09426	8.3251	6.34609	12.1172	19.8549	58.0752	103.336	no	mRNA	NA	NA	NA	NA	ENSMUSG00000026610	protein_coding	NA	NA	NA	NA
	XLOC_001387	1	188263033	188965041	+	protein_coding	snRNA	FALSE	none	15767	31	NA	protein_coding	0	0	2.66397	1.03142	2.08128	2.11536	2.79627	0.992745	1.9041	0.965752	no	NA	NA	NA	NA	NA	ENSMUSG00000026609	protein_coding	NA	NA	NA	NA
	XLOC_001388	1	188760475	188760579	+	snRNA	protein_coding	FALSE	none	104	104	NA	lncRNA	0	0	0	0	0	0	0	0	0	0	no	NA	NA	NA	NA	NA	ENSMUSG00000084550	snRNA	NA	NA	NA	NA
	XLOC_001389	1	189033039	189064623	+	lncRNA	NA	TRUE	none	832	60	NA	lncRNA	0	0	0	0	0	0	0	0	0	0	no	NA	NA	NA	NA	NA	Necsulea_Locus_80351	lncRNA	NA	NA	NA	NA
	XLOC_001390	1	189393349	189393470	+	miRNA	NA	FALSE	none	121	121	NA	lncRNA	0	0	0	0	0	0	0	0	0	0	no	NA	NA	NA	NA	NA	ENSMUSG00000093791	miRNA	NA	NA	NA	NA
	XLOC_001391	1	189422436	189430395	+	lncRNA	NA	TRUE	none	714	180	NA	lncRNA	0	0	0	0	0	0	0	0	0	0	no	NA	NA	NA	NA	NA	Necsulea_Locus_80834	lncRNA	NA	NA	NA	NA
	XLOC_001392	1	189728267	189876695	+	protein_coding	NA	FALSE	protein_coding	10827	78	0.730672	protein_coding	208.953	407.279	717.496	1549.19	1302.88	1256.52	1923.84	1344.18	1388.09	710.794	yes	mRNA	30	1261	40	254	ENSMUSG00000026604	protein_coding	23.6269	0.0211774	149.486	-0.038364
	XLOC_001393	1	190087630	190090803	+	lncRNA	NA	TRUE	none	735	23	NA	lncRNA	0	0	0	0	0	0	0	0	0	0	no	NA	NA	NA	NA	NA	Necsulea_Locus_80198	lncRNA	NA	NA	NA	NA
	XLOC_001394	1	190171242	190172043	+	NA	NA	FALSE	none	801	0	NA	lncRNA	0	0	0	0	0	0	1.86418	1.98549	4.76026	6.76027	no	NA	NA	NA	NA	NA	NA	NA	NA	NA	NA	NA
	XLOC_001395	1	190172386	190172900	+	NA	NA	FALSE	none	514	52	NA	lncRNA	0	0	0	0	0	1.05768	1.86418	8.9347	4.76026	2.89726	no	NA	NA	NA	NA	NA	NA	NA	NA	NA	NA	NA
	XLOC_001396	1	190389488	190389672	+	lncRNA	NA	TRUE	none	184	0	NA	lncRNA	0	0	0	0	0	0	0	0	0	0	no	NA	NA	NA	NA	NA	Necsulea_blastnOrangutan.Locus_60056	TooShort	NA	NA	NA	NA
	XLOC_001397	1	190594261	190598343	+	lncRNA	NA	TRUE	none	1841	400	NA	lncRNA	0	0	0	0	0	0	0	0	0	0	no	NA	NA	NA	NA	NA	Necsulea_Locus_82461|Necsulea_blastnHuman.ENSG00000225233|Necsulea_Locus_80868	lncRNA	NA	NA	NA	NA
	XLOC_001398	1	190925111	190947116	+	nonsense_mediated_decay;protein_coding	NA	FALSE	none	5200	406	0.348058	protein_coding	438.985	342.3	528.354	511.584	436.027	391.342	459.521	595.647	436.04	604.561	no	NA	NA	NA	NA	NA	ENSMUSG00000026634	nonsense_mediated_decay,protein_coding	58.2021	-0.110293	107.376	-0.228277
	XLOC_001399	1	190992685	190994474	+	lncRNA	NA	TRUE	none	717	0	NA	lncRNA	0	0	0	0	0	0	0	0	0	0	no	NA	NA	NA	NA	NA	Necsulea_Locus_81328	lncRNA	NA	NA	NA	NA
	XLOC_001400	1	191025349	191026186	+	protein_coding	NA	FALSE	none	837	0	NA	protein_coding	0	0	0	2.06284	0	0	0	0	0.952052	0	no	NA	NA	NA	NA	NA	ENSMUSG00000097845	protein_coding	NA	NA	NA	NA
	XLOC_001401	1	191036334	191042941	+	protein_coding	NA	FALSE	none	511	0	NA	lncRNA	0.916462	0	7.10392	14.4399	0	2.11536	0	0	0	0	no	NA	NA	NA	NA	NA	ENSMUSG00000057072	protein_coding	NA	NA	NA	NA
	XLOC_001402	1	191063011	191084558	+	protein_coding	NA	FALSE	protein_coding	3706	362	0.799328	protein_coding	605.781	681.119	321.452	272.295	383.995	329.996	408.256	387.171	432.232	389.198	no	mRNA	NA	NA	NA	NA	ENSMUSG00000062510	protein_coding	24.9091	-0.0651888	62.6771	-0.0136829
	XLOC_001403	1	191092376	191093090	+	NA	NA	TRUE	none	714	71	NA	lncRNA	0	1.16034	0	0	4.16255	3.17304	2.79627	5.95647	1.9041	1.9315	no	NA	NA	NA	NA	NA	NA	NA	NA	NA	NA	NA
	XLOC_001404	1	191097852	191109076	+	protein_coding	NA	FALSE	protein_coding	1230	0	NA	protein_coding	2.74938	6.96204	5.32794	26.8169	11.447	8.46145	30.759	18.8622	14.2808	17.3835	no	mRNA	NA	NA	NA	NA	ENSMUSG00000026630	protein_coding	NA	NA	NA	NA
	XLOC_001405	1	191183566	191184451	+	NA	NA	FALSE	none	885	0	NA	lncRNA	2.74938	4.64136	3.55196	2.06284	3.12191	5.2884	7.45673	5.95647	10.4726	6.76027	no	NA	NA	NA	NA	NA	NA	NA	NA	NA	NA	NA
	XLOC_001406	1	191196905	191197013	+	lncRNA	NA	TRUE	none	108	108	NA	lncRNA	0	0	0	0	0	0	0	0	0	0	no	NA	NA	NA	NA	NA	Ensembl_ENSMUSG00000088461	TooShort	NA	NA	NA	NA
	XLOC_001407	1	191224460	191231249	+	lncRNA	NA	TRUE	lincRNA	6539	1932	0.792893	lncRNA	12.8305	26.6878	1.77598	6.18852	39.5442	29.6151	38.2157	38.7171	61.8834	48.2876	no	lncRNA	NA	NA	NA	NA	Necsulea_ENSMUSG00000073478|Ensembl_ENSMUSG00000073478|Guttman_lincRNA_453	lncRNA	NA	NA	NA	NA
	XLOC_001408	1	191233156	191235688	+	NA	NA	TRUE	none	2532	1302	NA	lncRNA	0.916462	3.48102	0.88799	2.06284	14.5689	2.11536	9.32091	9.92745	4.76026	14.4863	no	NA	NA	NA	NA	NA	NA	NA	NA	NA	NA	NA
	XLOC_001409	1	191240717	191243708	+	NA	NA	TRUE	none	2991	378	0.429955	lncRNA	0	1.16034	0	1.03142	10.4064	1.05768	10.253	5.95647	7.61642	8.69177	no	NA	NA	NA	NA	NA	NA	NA	NA	NA	NA	NA
	XLOC_001410	1	191267023	191285142	+	lncRNA	NA	TRUE	none	1474	300	NA	lncRNA	0	0	0	0	0	0	1.86418	0	1.9041	2.89726	no	NA	NA	NA	NA	NA	Necsulea_Locus_81408	lncRNA	NA	NA	NA	NA
	XLOC_001411	1	191325911	191351275	+	protein_coding	NA	FALSE	protein_coding	2607	0	2.68341	protein_coding	56.8206	91.6668	46.1755	49.5081	62.4383	82.4991	144.474	129.057	172.321	150.657	yes	mRNA	1	118	19	53	ENSMUSG00000026627	protein_coding	14.7531	0.236803	39.3245	0.215051
	XLOC_001412	1	191397403	191398915	+	NA	NA	FALSE	none	1512	378	NA	lncRNA	3.66585	2.32068	2.66397	2.06284	6.24383	2.11536	2.79627	9.92745	18.089	9.65752	no	lncRNA	NA	NA	NA	NA	NA	NA	NA	NA	NA	NA
	XLOC_001413	1	191575535	191624005	+	protein_coding	NA	FALSE	protein_coding	5764	383	1.61355	protein_coding	1261.97	1330.91	1181.91	897.335	710.756	854.606	1115.71	1175.41	920.635	1086.47	no	mRNA	NA	NA	NA	NA	ENSMUSG00000037461	protein_coding	225.381	-0.182308	348.905	-0.258822
	XLOC_001414	1	191717833	191784350	+	protein_coding	NA	FALSE	protein_coding	7537	68	0.343477	protein_coding	561.791	864.453	504.378	647.732	779.438	620.859	1632.09	1423.6	1342.39	1271.9	yes	mRNA	10	126	15	76	ENSMUSG00000026623	protein_coding	32.3022	0.143504	154.002	0.241162
	XLOC_001415	1	191821443	191837673	+	protein_coding	NA	FALSE	protein_coding	7850	1490	0.909998	protein_coding	1396.69	1281.01	1468.73	1384.17	924.087	1135.95	1016.91	937.151	771.162	623.876	yes	mRNA	34	701	42	349	ENSMUSG00000026622	protein_coding	32.1242	0.0452237	27.3981	-0.058298
	XLOC_001416	1	191906693	191913380	+	protein_coding	NA	FALSE	protein_coding	5450	183	0.718653	protein_coding	476.56	449.051	257.517	311.489	284.094	306.727	469.774	314.7	283.712	262.685	yes	mRNA	13	214	27	145	ENSMUSG00000037434	protein_coding	NA	NA	13.2618	-0.00423408
	XLOC_001417	1	191928629	191931301	+	NA	NA	TRUE	lincRNA	2672	818	NA	lncRNA	38.4914	24.3671	0	1.03142	0	0	0	0	0.952052	0	no	NA	NA	NA	NA	NA	NA	NA	NA	NA	NA	NA
	XLOC_001418	1	191932090	191933602	+	NA	NA	TRUE	lincRNA	1512	139	NA	lncRNA	12.8305	12.7637	0	0	0	0	0	0	0	0.965752	no	NA	NA	NA	NA	NA	NA	NA	NA	NA	NA	NA
	XLOC_001419	1	191977372	191988282	+	protein_coding	NA	FALSE	none	4267	541	NA	protein_coding	0.916462	1.16034	0	0	1.04064	0	0	0.992745	0	0	no	NA	NA	NA	NA	NA	ENSMUSG00000049353	protein_coding	NA	NA	NA	NA
	XLOC_001420	1	191993070	191993260	+	NA	NA	FALSE	none	190	0	0.261204	lncRNA	7.33169	3.48102	0.88799	3.09426	1.04064	5.2884	0	2.97823	1.9041	0	no	NA	NA	NA	NA	NA	NA	NA	NA	NA	NA	NA
	XLOC_001421	1	192138057	192142637	+	NA	NA	FALSE	none	4580	1270	NA	lncRNA	17.4128	6.96204	2.66397	10.3142	38.5036	17.9806	31.6911	30.7751	52.3629	53.1164	no	lncRNA	NA	NA	NA	NA	NA	NA	NA	NA	NA	NA
	XLOC_001422	1	192190783	192510159	+	protein_coding	NA	FALSE	protein_coding	7232	147	0.504571	protein_coding	1.83292	2.32068	12.4319	19.597	10.4064	10.5768	21.4381	18.8622	38.0821	35.7328	no	mRNA	NA	NA	NA	NA	ENSMUSG00000058248	protein_coding	NA	NA	NA	NA
	XLOC_001423	1	192745570	192746962	+	snRNA	NA	FALSE	none	1392	239	0.295291	lncRNA	4.58231	5.8017	30.1916	17.5341	12.4877	20.0959	19.5739	23.8259	19.9931	13.5205	no	NA	NA	NA	NA	NA	ENSMUSG00000094131	snRNA	NA	NA	NA	NA
	XLOC_001424	1	192781677	192785339	+	lncRNA	NA	TRUE	none	423	0	NA	lncRNA	0	0	0	0	0	0	0.932091	0	0.952052	0	no	NA	NA	NA	NA	NA	Necsulea_Locus_80686	lncRNA	NA	NA	NA	NA
	XLOC_001425	1	192822952	192823103	+	lncRNA	NA	TRUE	none	151	0	NA	lncRNA	0	0	0	0	0	0	0	0	0	0	no	NA	NA	NA	NA	NA	Necsulea_blastnOpossum.Locus_190612	TooShort	NA	NA	NA	NA
	XLOC_001426	1	193153111	193178085	+	protein_coding	NA	FALSE	protein_coding	8593	734	0.196554	protein_coding	294.184	349.262	325.892	395.034	383.995	388.169	518.243	315.693	421.759	341.876	yes	mRNA	6	78	41	74	NA	NA	NA	NA	NA	NA
	XLOC_001427	1	193273383	193279995	+	lncRNA	NA	FALSE	none	75	30	NA	lncRNA	0	0	0	0	0	0	0	0	0	0	no	NA	NA	NA	NA	NA	Guttman_lincRNA_455	Overlap	NA	NA	NA	NA
	XLOC_001428	1	193289258	193294438	+	lncRNA	NA	TRUE	none	388	140	NA	lncRNA	0	0	0	0	0	0	0	0	0	0	no	NA	NA	NA	NA	NA	Necsulea_Locus_80818	lncRNA	NA	NA	NA	NA
	XLOC_001429	1	193301956	193343878	+	protein_coding	NA	FALSE	protein_coding	4201	0	NA	protein_coding	7.33169	3.48102	13.3198	44.351	36.4223	41.2496	17.7097	17.8694	15.2328	19.315	no	mRNA	NA	NA	NA	NA	ENSMUSG00000026639	protein_coding	NA	NA	NA	NA
	XLOC_001430	1	193421045	193421140	+	lncRNA	NA	TRUE	none	95	0	NA	lncRNA	0	0	0	0	0	0	0	0	0	0	no	NA	NA	NA	NA	NA	Necsulea_blastnHuman.ENSG00000224260	TooShort	NA	NA	NA	NA
	XLOC_001431	1	193681271	193681420	+	lncRNA	NA	TRUE	none	149	0	NA	lncRNA	0	0	0	0	0	0	0	0	0	0	no	NA	NA	NA	NA	NA	Necsulea_blastnMacaque.Locus_188105	TooShort	NA	NA	NA	NA
	XLOC_001432	1	193736586	193736775	+	lncRNA	NA	TRUE	none	189	0	NA	lncRNA	0	0	0	0	1.04064	0	0	0	0	0	no	NA	NA	NA	NA	NA	Necsulea_blastnHuman.ENSG00000232537	TooShort	NA	NA	NA	NA
	XLOC_001433	1	193896418	193896530	+	lncRNA	NA	TRUE	none	112	0	NA	lncRNA	0	0	0	0	0	0	0	0	0	0	no	NA	NA	NA	NA	NA	Necsulea_blastnMacaque.Locus_187687	TooShort	NA	NA	NA	NA
	XLOC_001434	1	194237364	194237443	+	lncRNA	NA	TRUE	none	79	0	NA	lncRNA	0	0	0	0	0	0	0	0	0	0	no	NA	NA	NA	NA	NA	Necsulea_blastnGorilla.Locus_60329	TooShort	NA	NA	NA	NA
	XLOC_001435	1	194619818	194816869	+	nonsense_mediated_decay;protein_coding	NA	FALSE	none	11234	41	1.20219	protein_coding	126.472	175.211	64.8232	73.2308	126.958	588.071	1787.75	1784.96	1163.41	1338.53	no	NA	NA	NA	NA	NA	ENSMUSG00000026640	nonsense_mediated_decay,protein_coding	NA	NA	NA	NA
	XLOC_001436	1	194818878	194819812	+	NA	NA	FALSE	none	934	54	NA	lncRNA	0	0	0	0	1.04064	1.05768	5.59255	5.95647	0.952052	2.89726	no	NA	NA	NA	NA	NA	NA	NA	NA	NA	NA	NA
	XLOC_001437	1	194822000	194822064	+	miRNA	NA	FALSE	none	64	0	NA	lncRNA	0	0	0	0	0	0	0.932091	0	0	0	no	NA	NA	NA	NA	NA	ENSMUSG00000092633	miRNA	NA	NA	NA	NA
	XLOC_001438	1	194858656	194858950	+	lncRNA	NA	TRUE	none	294	243	NA	lncRNA	0	0	0	0	0	0	0	0	0	0	no	NA	NA	NA	NA	NA	Ensembl_ENSMUSG00000084631	lncRNA	NA	NA	NA	NA
	XLOC_001439	1	194938820	194961292	+	protein_coding	NA	FALSE	protein_coding	2621	0	0.292728	protein_coding	8.24815	3.48102	45.2875	71.168	41.6255	15.8652	27.0306	48.6445	27.6095	86.9177	no	mRNA	NA	NA	NA	NA	ENSMUSG00000016494	protein_coding	NA	NA	NA	NA
	XLOC_001440	1	194976374	195029145	+	lncRNA	lncRNA	TRUE	lincRNA	6783	213	NA	lncRNA	9.16462	8.12237	4.43995	8.25136	65.5602	45.4803	19.5739	32.7606	26.6575	28.0068	no	lncRNA	NA	NA	NA	NA	Ensembl_ENSMUSG00000096929|Necsulea_CUFF.141159|Guttman_lincRNA_456|Guttman_lincRNA_457|Guttman_lincRNA_458|Guttman_lincRNA_459|Guttman_lincRNA_460|Guttman_lincRNA_461|Guttman_lincRNA_462|Necsulea_Locus_82660|Guttman_lincRNA_463|Guttman_lincRNA_464	lncRNA	NA	NA	13.1652	-0.0610331
	XLOC_001441	1	194977281	194979188	+	lncRNA	lncRNA	TRUE	none	390	0	NA	lncRNA	4.58231	3.48102	0	2.06284	17.6908	12.6922	6.52464	8.9347	14.2808	6.76027	no	NA	NA	NA	NA	NA	Ensembl_ENSMUSG00000096929|Necsulea_CUFF.141159|Guttman_lincRNA_456|Guttman_lincRNA_457|Guttman_lincRNA_458|Guttman_lincRNA_459|Guttman_lincRNA_460|Guttman_lincRNA_461|Guttman_lincRNA_462|Necsulea_Locus_82660|Guttman_lincRNA_463|Guttman_lincRNA_464	lncRNA	NA	NA	13.1652	-0.0610331
	XLOC_001442	1	194998116	194999067	+	lncRNA	lncRNA	TRUE	none	951	0	NA	lncRNA	1.83292	2.32068	0.88799	2.06284	14.5689	16.9229	9.32091	12.9057	7.61642	8.69177	no	NA	NA	NA	NA	NA	Ensembl_ENSMUSG00000096929|Necsulea_CUFF.141159|Guttman_lincRNA_456|Guttman_lincRNA_457|Guttman_lincRNA_458|Guttman_lincRNA_459|Guttman_lincRNA_460|Guttman_lincRNA_461|Guttman_lincRNA_462|Necsulea_Locus_82660|Guttman_lincRNA_463|Guttman_lincRNA_464	lncRNA	NA	NA	13.1652	-0.0610331
	XLOC_001443	1	195033488	195038310	+	miRNA	NA	FALSE	none	4822	0	NA	lncRNA	9.16462	6.96204	7.99191	12.377	37.463	25.3843	18.6418	39.7098	7.61642	14.4863	no	NA	NA	NA	NA	NA	NA	NA	NA	NA	NA	NA
	XLOC_001444	1	195228277	195228398	+	miRNA	NA	FALSE	none	121	121	NA	lncRNA	0	0	0	0	0	0	0	0	0	0	no	NA	NA	NA	NA	NA	ENSMUSG00000093823	miRNA	NA	NA	NA	NA
	XLOC_001445	1	3200222	3671766	-	protein_coding	NA	FALSE	protein_coding	12040	585	NA	protein_coding	0	1.16034	7.10392	56.7281	95.7387	243.267	13.9814	23.8259	78.0683	128.445	yes	mRNA	0	5	5	41	ENSMUSG00000051951	protein_coding	NA	NA	NA	NA
	XLOC_001446	1	3783875	3783933	-	snRNA	NA	FALSE	none	58	56	NA	lncRNA	0	0	0	0	0	0	0	0	0	0	no	NA	NA	NA	NA	NA	ENSMUSG00000088333	snRNA	NA	NA	NA	NA
	XLOC_001447	1	4343506	4360314	-	protein_coding	NA	FALSE	none	7508	452	NA	protein_coding	0	0	0	0	0	3.17304	0.932091	0.992745	0	0	no	NA	NA	NA	NA	NA	ENSMUSG00000025900	protein_coding	NA	NA	NA	NA
	XLOC_001448	1	4490791	4496413	-	protein_coding	NA	FALSE	protein_coding	3290	59	NA	protein_coding	17.4128	16.2447	4.43995	2.06284	29.1379	306.727	323.436	214.433	243.725	112.027	no	mRNA	NA	NA	NA	NA	ENSMUSG00000025902	protein_coding	NA	NA	13.5106	0.0643271
	XLOC_001449	1	4603902	4605182	-	lncRNA	NA	TRUE	none	416	276	NA	lncRNA	0	0	0	0	0	0	0	0.992745	0	0.965752	no	NA	NA	NA	NA	NA	Necsulea_Locus_82051	lncRNA	NA	NA	NA	NA
	XLOC_001450	1	4687933	4689403	-	processed_pseudogene	NA	FALSE	none	1470	18	0.287061	lncRNA	2.74938	2.32068	7.99191	2.06284	7.28447	3.17304	0	3.97098	8.56847	3.86301	no	NA	NA	NA	NA	NA	ENSMUSG00000098104	processed_pseudogene	NA	NA	NA	NA
	XLOC_001451	1	4692083	4802328	-	nonsense_mediated_decay;protein_coding	NA;snRNA	FALSE	none	4865	998	1.37996	protein_coding	2928.09	1985.34	2822.03	2211.36	1167.6	1240.66	877.098	640.321	714.039	658.643	no	NA	NA	NA	NA	NA	ENSMUSG00000033845	nonsense_mediated_decay,protein_coding	431.911	-0.156808	173.791	-0.337065
	XLOC_001452	1	4692554	4693360	-	NA	nonsense_mediated_decay;protein_coding	FALSE	none	806	0	NA	lncRNA	0.916462	1.16034	1.77598	1.03142	6.24383	2.11536	0	5.95647	3.80821	6.76027	no	NA	NA	NA	NA	NA	NA	NA	NA	NA	NA	NA
	XLOC_001453	1	4723276	4723379	-	snRNA	nonsense_mediated_decay;protein_coding	FALSE	none	103	93	NA	lncRNA	0	0	0	1.03142	3.12191	0	1.86418	0.992745	0.952052	0.965752	no	NA	NA	NA	NA	NA	ENSMUSG00000088000	snRNA	NA	NA	NA	NA
	XLOC_001454	1	4737480	4741024	-	NA	nonsense_mediated_decay;protein_coding	TRUE	none	3544	395	NA	lncRNA	2.74938	1.16034	7.10392	10.3142	14.5689	10.5768	10.253	25.8114	9.52052	28.9726	no	NA	NA	NA	NA	NA	NA	NA	NA	NA	NA	NA
	XLOC_001455	1	4741502	4742632	-	NA	nonsense_mediated_decay;protein_coding	TRUE	none	1130	315	NA	lncRNA	0	0	0	3.09426	10.4064	3.17304	4.66046	4.96372	7.61642	2.89726	no	NA	NA	NA	NA	NA	NA	NA	NA	NA	NA	NA
	XLOC_001456	1	4743134	4744195	-	NA	nonsense_mediated_decay;protein_coding	TRUE	none	1061	122	NA	lncRNA	0	0	3.55196	6.18852	7.28447	2.11536	6.52464	9.92745	7.61642	6.76027	no	NA	NA	NA	NA	NA	NA	NA	NA	NA	NA	NA
	XLOC_001457	1	4744912	4745679	-	NA	nonsense_mediated_decay;protein_coding	TRUE	none	767	64	NA	lncRNA	0.916462	0	2.66397	2.06284	3.12191	5.2884	1.86418	1.98549	4.76026	1.9315	no	NA	NA	NA	NA	NA	NA	NA	NA	NA	NA	NA
	XLOC_001458	1	4746431	4749411	-	NA	nonsense_mediated_decay;protein_coding	TRUE	none	2980	513	NA	lncRNA	0.916462	1.16034	5.32794	6.18852	17.6908	6.34609	9.32091	22.8331	12.3767	20.2808	no	NA	NA	NA	NA	NA	NA	NA	NA	NA	NA	NA
	XLOC_001459	1	4759411	4760221	-	NA	nonsense_mediated_decay;protein_coding	TRUE	none	810	376	NA	lncRNA	0	0	0.88799	0	4.16255	0	0	3.97098	4.76026	2.89726	no	NA	NA	NA	NA	NA	NA	NA	NA	NA	NA	NA
	XLOC_001460	1	4760330	4760817	-	NA	nonsense_mediated_decay;protein_coding	TRUE	none	487	21	NA	lncRNA	0.916462	1.16034	0	1.03142	3.12191	0	1.86418	6.94921	0.952052	3.86301	no	NA	NA	NA	NA	NA	NA	NA	NA	NA	NA	NA
	XLOC_001461	1	4762785	4763923	-	NA	nonsense_mediated_decay;protein_coding	TRUE	none	1138	276	NA	lncRNA	0	1.16034	1.77598	2.06284	6.24383	5.2884	4.66046	7.94196	4.76026	8.69177	no	NA	NA	NA	NA	NA	NA	NA	NA	NA	NA	NA
	XLOC_001462	1	4768067	4769542	-	NA	nonsense_mediated_decay;protein_coding	FALSE	none	1475	456	NA	lncRNA	2.74938	2.32068	1.77598	1.03142	8.3251	5.2884	6.52464	7.94196	6.66437	15.452	no	NA	NA	NA	NA	NA	NA	NA	NA	NA	NA	NA
	XLOC_001463	1	4769667	4771163	-	NA	nonsense_mediated_decay;protein_coding	FALSE	none	1496	162	NA	lncRNA	2.74938	2.32068	1.77598	0	8.3251	6.34609	4.66046	6.94921	10.4726	12.5548	no	NA	NA	NA	NA	NA	NA	NA	NA	NA	NA	NA
	XLOC_001464	1	4807036	4807782	-	NA	NA	FALSE	none	746	72	NA	lncRNA	2.74938	0	0.88799	7.21994	2.08128	1.05768	0	0	1.9041	3.86301	no	NA	NA	NA	NA	NA	NA	NA	NA	NA	NA	NA
	XLOC_001465	1	4879201	4880669	-	protein_coding	NA	FALSE	none	1468	68	1.49352	protein_coding	0	0	0.88799	0	2.08128	1.05768	0	0	0.952052	0	no	NA	NA	NA	NA	NA	ENSMUSG00000062588	protein_coding	NA	NA	72.3998	-0.561191
	XLOC_001466	1	4909575	5070285	-	nonsense_mediated_decay;protein_coding	processed_pseudogene	FALSE	none	2703	223	NA	protein_coding	1.83292	0	32.8556	10.3142	36.4223	13.7499	9.32091	6.94921	5.71231	5.79451	no	NA	NA	NA	NA	NA	ENSMUSG00000002459	nonsense_mediated_decay,protein_coding	NA	NA	NA	NA
	XLOC_001467	1	4927027	4927299	-	processed_pseudogene	nonsense_mediated_decay;protein_coding	FALSE	none	272	0	NA	lncRNA	0	0	0	0	1.04064	0	1.86418	0	0	0	no	NA	NA	NA	NA	NA	ENSMUSG00000091305	processed_pseudogene	NA	NA	NA	NA
	XLOC_001468	1	5644644	5644745	-	miRNA	NA	FALSE	none	101	101	NA	lncRNA	0	0	0	0	0	0	0	0	0	0	no	NA	NA	NA	NA	NA	ENSMUSG00000093015	miRNA	NA	NA	NA	NA
	XLOC_001469	1	5913706	5917398	-	protein_coding	NA	FALSE	none	3692	178	NA	protein_coding	0	0	1.77598	1.03142	0	0	0	0.992745	2.85616	2.89726	no	mRNA	NA	NA	NA	NA	ENSMUSG00000033774	protein_coding	NA	NA	NA	NA
	XLOC_001470	1	6180673	6182218	-	lncRNA	NA	TRUE	none	551	134	NA	lncRNA	0	0	0	0	1.04064	0	0.932091	0	0.952052	0	no	NA	NA	NA	NA	NA	Necsulea_CUFF.124979	lncRNA	NA	NA	NA	NA
	XLOC_001471	1	6214611	6215292	-	protein_coding	NA	FALSE	none	681	0	NA	protein_coding	0	2.32068	0	0	0	0	1.86418	1.98549	0	0	no	NA	NA	NA	NA	NA	ENSMUSG00000073741	protein_coding	NA	NA	NA	NA
	XLOC_001472	1	7003161	7004375	-	lncRNA	NA	TRUE	none	283	112	NA	lncRNA	0	0	0	0	0	0	0	0	0	0	no	NA	NA	NA	NA	NA	Necsulea_Locus_81777	lncRNA	NA	NA	NA	NA
	XLOC_001473	1	7086521	7088761	-	NA	NA	FALSE	none	2240	645	NA	lncRNA	5.49877	9.28271	7.99191	16.5027	8.3251	5.2884	7.45673	9.92745	25.7054	8.69177	no	lncRNA	NA	NA	NA	NA	NA	NA	NA	NA	NA	NA
	XLOC_001474	1	7136198	7136586	-	processed_pseudogene	NA	FALSE	none	388	0	0.234635	lncRNA	0	0	0	0	0	0	0	0	0	0	no	NA	NA	NA	NA	NA	ENSMUSG00000098201	processed_pseudogene	NA	NA	NA	NA
	XLOC_001475	1	7314635	7397878	-	lncRNA	NA	TRUE	none	1918	1431	0.612719	lncRNA	2.74938	4.64136	4.43995	8.25136	7.28447	8.46145	7.45673	6.94921	6.66437	7.72602	no	NA	NA	NA	NA	NA	Necsulea_ENSMUSG00000086461|Ensembl_ENSMUSG00000097797|Necsulea_Locus_80959|Guttman_lincRNA_209	lncRNA	NA	NA	NA	NA
	XLOC_001476	1	8111998	8122500	-	lncRNA	NA	TRUE	none	407	191	NA	lncRNA	0	0	0	0	0	0	0	0	0	0	no	NA	NA	NA	NA	NA	Necsulea_Locus_81791	lncRNA	NA	NA	NA	NA
	XLOC_001477	1	8321830	8322458	-	lncRNA	NA	TRUE	none	293	0	NA	lncRNA	0	0	0	0	0	0	0	0	0	0	no	NA	NA	NA	NA	NA	Necsulea_Locus_82179	lncRNA	NA	NA	NA	NA
	XLOC_001478	1	8361455	9299924	-	nonsense_mediated_decay;protein_coding	processed_pseudogene;miRNA	FALSE	none	7536	798	NA	protein_coding	0	0	0.88799	0	1.04064	1.05768	8.38882	19.8549	11.4246	25.1096	no	NA	NA	NA	NA	NA	ENSMUSG00000025909	nonsense_mediated_decay,protein_coding	NA	NA	NA	NA
	XLOC_001479	1	8468425	8468825	-	processed_pseudogene	nonsense_mediated_decay;protein_coding	FALSE	none	400	0	NA	lncRNA	0	0	0	0	0	0	0	0	0	0	no	NA	NA	NA	NA	NA	ENSMUSG00000086235	processed_pseudogene	NA	NA	NA	NA
	XLOC_001480	1	8588614	8588724	-	miRNA	nonsense_mediated_decay;protein_coding	FALSE	none	110	110	NA	lncRNA	0	0	0	0	0	0	0	0	0	0	no	NA	NA	NA	NA	NA	ENSMUSG00000093970	miRNA	NA	NA	NA	NA
	XLOC_001481	1	8791922	8792162	-	processed_pseudogene	nonsense_mediated_decay;protein_coding	FALSE	none	240	0	1.49581	lncRNA	0	0	0	0	0	0	0	0	0	0	no	NA	NA	NA	NA	NA	ENSMUSG00000084353	processed_pseudogene	NA	NA	NA	NA
	XLOC_001482	1	8855927	8856267	-	processed_pseudogene	nonsense_mediated_decay;protein_coding	FALSE	none	340	0	NA	lncRNA	1.83292	0	2.66397	0	0	0	0	0	0	0	no	NA	NA	NA	NA	NA	ENSMUSG00000086195	processed_pseudogene	NA	NA	NA	NA
	XLOC_001483	1	8962995	8963621	-	processed_pseudogene	nonsense_mediated_decay;protein_coding	FALSE	none	626	0	0.651095	lncRNA	0	0	0	0	0	0	0	0	0	0	no	NA	NA	NA	NA	NA	ENSMUSG00000066693	processed_pseudogene	NA	NA	NA	NA
	XLOC_001484	1	9524335	9526158	-	NA	NA	TRUE	none	1823	961	NA	lncRNA	1.83292	5.8017	0.88799	0	10.4064	7.40377	5.59255	10.9202	5.71231	6.76027	no	NA	NA	NA	NA	NA	NA	NA	NA	NA	NA	NA
	XLOC_001485	1	9542676	9545292	-	NA	NA	FALSE	none	2616	642	NA	lncRNA	10.9975	11.6034	10.6559	9.28278	30.1785	19.0383	16.7776	24.8186	26.6575	20.2808	no	lncRNA	NA	NA	NA	NA	NA	NA	NA	NA	NA	NA
	XLOC_001486	1	9560831	9631092	-	protein_coding	NA	FALSE	none	1246	424	0.32562	lncRNA	0.916462	0	0	0	0	0	0	0.992745	0	1.9315	no	NA	NA	NA	NA	NA	ENSMUSG00000079671	protein_coding	NA	NA	NA	NA
	XLOC_001487	1	9667409	9700423	-	protein_coding	NA	FALSE	protein_coding	7772	559	0.224406	protein_coding	524.216	590.613	277.053	210.41	315.313	276.055	202.264	253.15	365.588	515.712	yes	mRNA	12	256	38	316	ENSMUSG00000025912	protein_coding	17.5655	-0.0457461	12.7048	-0.420284
	XLOC_001488	1	9718621	9748382	-	protein_coding	NA	FALSE	protein_coding	9749	476	1.1404	protein_coding	761.58	901.584	781.431	773.565	949.062	995.278	1056.06	917.296	1032.98	1175.32	yes	mRNA	19	368	41	190	ENSMUSG00000045210	protein_coding	43.9364	0.0560453	122.275	-0.170565
	XLOC_001489	1	9802193	9802553	-	processed_pseudogene	NA	FALSE	none	360	0	3.18834	protein_coding	0	0	0	0	0	0	0	0	0	0	no	NA	NA	NA	NA	NA	ENSMUSG00000046334	processed_pseudogene	NA	NA	NA	NA
	XLOC_001490	1	9834497	9834602	-	snRNA	NA	FALSE	none	105	0	NA	lncRNA	0	0	0	0	0	0	0	0	0	0	no	NA	NA	NA	NA	NA	ENSMUSG00000088916	snRNA	NA	NA	NA	NA
	XLOC_001491	1	9938441	9940456	-	nonsense_mediated_decay;protein_coding	NA	FALSE	none	2015	1042	0.311555	lncRNA	18.3292	17.4051	13.3198	12.377	20.8128	7.40377	13.0493	9.92745	15.2328	8.69177	no	NA	NA	NA	NA	NA	ENSMUSG00000046101	nonsense_mediated_decay,protein_coding	29.2134	-0.610937	73.4016	-0.790157
	XLOC_001492	1	9942091	9944152	-	snoRNA	snoRNA	FALSE	none	1246	276	0.0376947	lncRNA	1316.04	943.356	941.269	676.611	408.971	392.4	413.849	296.831	603.601	468.39	no	NA	NA	NA	NA	NA	ENSMUSG00000093178	snoRNA	NA	NA	NA	NA
	XLOC_001493	1	9942462	9942549	-	snoRNA	snoRNA	FALSE	none	87	0	0.067218	lncRNA	21.0786	8.12237	15.0958	11.3456	6.24383	7.40377	9.32091	4.96372	10.4726	4.82876	no	NA	NA	NA	NA	NA	ENSMUSG00000093178	snoRNA	NA	NA	NA	NA
	XLOC_001494	1	9960162	9967932	-	protein_coding	NA	FALSE	protein_coding	4193	459	NA	protein_coding	46.7395	69.6204	41.7355	38.1625	22.894	21.1536	22.3702	8.9347	14.2808	1.9315	no	mRNA	NA	NA	NA	NA	NA	NA	NA	NA	NA	NA
	XLOC_001495	1	9968623	10009136	-	nonsense_mediated_decay;protein_coding	NA	FALSE	none	1440	0	NA	protein_coding	0	0	0.88799	0	2.08128	3.17304	0.932091	1.98549	0	0	no	NA	NA	NA	NA	NA	ENSMUSG00000025916	nonsense_mediated_decay,protein_coding	NA	NA	NA	NA
	XLOC_001496	1	10009813	10009917	-	snRNA	NA	FALSE	none	104	104	NA	lncRNA	0	0	0	0	0	0	0	0	0	0	no	NA	NA	NA	NA	NA	ENSMUSG00000095780	snRNA	NA	NA	NA	NA
	XLOC_001497	1	10024601	10038167	-	protein_coding	NA	FALSE	protein_coding	1737	19	2.09537	protein_coding	1143.74	975.845	1126.86	1106.71	674.333	913.836	616.112	639.328	576.944	654.78	yes	mRNA	26	156	58	159	ENSMUSG00000025917	protein_coding	275.762	-0.00815634	208.001	-0.146588
	XLOC_001498	1	10137570	10233354	-	protein_coding	NA	FALSE	protein_coding	7148	0	0.75499	protein_coding	598.449	1289.14	596.729	904.555	1530.78	1876.33	2017.05	2339.9	2402.03	2033.87	yes	mRNA	25	236	25	210	ENSMUSG00000067851	protein_coding	17.2442	-0.0394143	232.158	-0.136106
	XLOC_001499	1	10324719	10719945	-	nonsense_mediated_decay;protein_coding	processed_pseudogene;snRNA	FALSE	none	1939	0	NA	protein_coding	0	0	0	0	0	1.05768	0	0.992745	1.9041	0.965752	no	NA	NA	NA	NA	NA	ENSMUSG00000042501	nonsense_mediated_decay,protein_coding	NA	NA	NA	NA
	XLOC_001500	1	10554097	10555553	-	processed_pseudogene	nonsense_mediated_decay;protein_coding	FALSE	none	1456	47	1.04778	lncRNA	0	0	0	0	0	0	0	0	0	0	no	NA	NA	NA	NA	NA	ENSMUSG00000083422	processed_pseudogene	NA	NA	NA	NA
	XLOC_001501	1	10555553	10555660	-	snRNA	nonsense_mediated_decay;protein_coding	FALSE	none	107	107	NA	lncRNA	0	0	0	0	0	0	0	0	0	0	no	NA	NA	NA	NA	NA	ENSMUSG00000094979	snRNA	NA	NA	NA	NA
	XLOC_001502	1	11134110	11134238	-	snoRNA	NA	FALSE	none	128	0	NA	lncRNA	0	0	0	0	0	0	0	0	0	0	no	NA	NA	NA	NA	NA	ENSMUSG00000077318	snoRNA	NA	NA	NA	NA
	XLOC_001503	1	11315067	11317440	-	lncRNA	NA	TRUE	none	657	546	NA	lncRNA	0	0	0	0	1.04064	0	0	0.992745	0	0	no	NA	NA	NA	NA	NA	Necsulea_Locus_82609	lncRNA	NA	NA	NA	NA
	XLOC_001504	1	11383869	11401157	-	lncRNA	NA	TRUE	lincRNA	6423	3076	0.624655	lncRNA	15.5798	26.6878	53.2794	59.8223	165.461	81.4414	0	0	0	0	no	lncRNA	NA	NA	NA	NA	Guttman_lincRNA_211	lncRNA	NA	NA	NA	NA
	XLOC_001505	1	12050577	12050671	-	lncRNA	NA	TRUE	none	94	0	NA	lncRNA	0	0	0	0	0	0	0	0	0	0	no	NA	NA	NA	NA	NA	Necsulea_blastnHuman.ENSG00000253658	TooShort	NA	NA	NA	NA
	XLOC_001506	1	12429283	12431663	-	lncRNA	NA	FALSE	none	204	157	NA	lncRNA	0	0	0	0	0	0	0	0	0	0	no	NA	NA	NA	NA	NA	Necsulea_CUFF.125118	Overlap	NA	NA	NA	NA
	XLOC_001507	1	12670585	12671651	-	lncRNA	NA	TRUE	none	727	209	NA	lncRNA	0	0	0	0	0	0	0	0	0.952052	0.965752	no	NA	NA	NA	NA	NA	Ensembl_ENSMUSG00000097171|Necsulea_ENSMUSG00000066918|Necsulea_blastnHuman.ENSG00000253479	lncRNA	NA	NA	NA	NA
	XLOC_001508	1	12866548	12992750	-	protein_coding	NA	FALSE	protein_coding	8777	124	0.296713	protein_coding	110.892	126.477	58.6073	86.6393	121.755	131.152	308.522	309.736	504.588	438.452	no	mRNA	NA	NA	NA	NA	ENSMUSG00000025938	protein_coding	NA	NA	15.4398	0.0444034
	XLOC_001509	1	13068945	13069404	-	lncRNA	NA	TRUE	none	336	246	NA	lncRNA	0	0	0	0	0	0	0	0	0	0	no	NA	NA	NA	NA	NA	Necsulea_Locus_81346|Necsulea_CUFF.125139|Necsulea_CUFF.125146	lncRNA	NA	NA	NA	NA
	XLOC_001510	1	13113243	13127799	-	protein_coding	NA	FALSE	protein_coding	3571	503	NA	protein_coding	967.783	855.17	192.694	126.865	50.9913	34.9035	25.1665	27.7969	13.3287	5.79451	yes	mRNA	1	73	6	42	ENSMUSG00000042414	protein_coding.stem.cell.maintenance	24.6668	0.370246	13.0462	0.79111
	XLOC_001511	1	13138838	13374450	-	protein_coding	snRNA	FALSE	none	9800	459	0.592614	protein_coding	807.403	993.25	588.737	707.554	945.94	939.221	1425.17	1650.93	1469.02	1502.71	no	NA	NA	NA	NA	NA	ENSMUSG00000005886	protein_coding	36.5719	0.220361	113.973	0.020919
	XLOC_001512	1	13334497	13334609	-	snRNA	protein_coding	FALSE	none	112	112	NA	lncRNA	0	1.16034	0	0	5.20319	2.11536	2.79627	5.95647	3.80821	3.86301	no	NA	NA	NA	NA	NA	ENSMUSG00000087782	snRNA	NA	NA	NA	NA
	XLOC_001513	1	13564701	13589864	-	protein_coding	NA	FALSE	protein_coding	2888	192	0.919618	protein_coding	1969.48	1860.02	1416.34	1718.35	1389.25	1769.5	1940.61	1523.86	1485.2	1265.14	yes	mRNA	16	131	8	213	ENSMUSG00000025935	protein_coding	182.977	-0.0231958	531.084	0.0351542
	XLOC_001514	1	13624844	13660546	-	protein_coding	NA	FALSE	protein_coding	3029	908	0.8568	protein_coding	2793.37	2349.69	894.205	644.637	467.246	484.418	465.114	332.57	309.417	225.02	yes	mRNA	39	125	91	292	ENSMUSG00000025937	protein_coding	133.471	0.00973411	68.3384	0.0426248
	XLOC_001515	1	13774333	13774464	-	snoRNA	NA	FALSE	none	131	0	NA	lncRNA	0	0	0	0	0	0	0	0	0	0	no	NA	NA	NA	NA	NA	ENSMUSG00000077368	snoRNA	NA	NA	NA	NA
	XLOC_001516	1	13785882	13786879	-	processed_pseudogene	NA	FALSE	none	997	0	2.58437	lncRNA	0	0	0.88799	0	0	1.05768	0	0	0	0	no	NA	NA	NA	NA	NA	ENSMUSG00000097711	processed_pseudogene	NA	NA	NA	NA
	XLOC_001517	1	14168953	14310200	-	protein_coding	NA	FALSE	protein_coding	5126	109	0.65182	protein_coding	378.499	363.186	107.447	179.467	120.714	125.864	68.9748	147.919	109.486	114.925	no	mRNA	NA	NA	NA	NA	ENSMUSG00000025932	protein_coding.neuron.differentiation	NA	NA	NA	NA
	XLOC_001518	1	14413966	14438189	-	lncRNA	NA	TRUE	none	326	117	NA	lncRNA	0	0	0	0	0	0	0.932091	0	0	0	no	NA	NA	NA	NA	NA	Necsulea_CUFF.125271|Necsulea_Locus_81762	lncRNA	NA	NA	NA	NA
	XLOC_001519	1	14632130	14634656	-	lncRNA	NA	TRUE	none	413	164	NA	lncRNA	0	0	0	0	0	0	0	0	0	0	no	NA	NA	NA	NA	NA	Necsulea_CUFF.125287	lncRNA	NA	NA	NA	NA
	XLOC_001520	1	14672755	14677256	-	lncRNA	NA	TRUE	none	343	0	NA	lncRNA	0	0	0	0	0	0	0	0	0	0	no	NA	NA	NA	NA	NA	Necsulea_Locus_81875	lncRNA	NA	NA	NA	NA
	XLOC_001521	1	14753345	14755966	-	protein_coding	NA	FALSE	protein_coding	1754	0	NA	protein_coding	62.3194	33.6498	94.1269	114.488	11.447	27.4997	6.52464	1.98549	1.9041	25.1096	yes	mRNA	5	63	10	85	ENSMUSG00000025930	protein_coding	NA	NA	NA	NA
	XLOC_001522	1	14839868	14840156	-	processed_pseudogene	NA	FALSE	none	288	0	2.14677	protein_coding	0	0	0	0	0	0	0	0	0	0	no	NA	NA	NA	NA	NA	ENSMUSG00000081201	processed_pseudogene	NA	NA	NA	NA
	XLOC_001523	1	14872647	14918947	-	protein_coding	NA	FALSE	protein_coding	4348	270	NA	protein_coding	15.5798	15.0844	30.1916	71.168	22.894	31.7304	4.66046	1.98549	0.952052	0.965752	no	mRNA	NA	NA	NA	NA	ENSMUSG00000032769	protein_coding	NA	NA	NA	NA
	XLOC_001524	1	15019039	15019159	-	snoRNA	NA	FALSE	none	120	0	NA	lncRNA	0	0	0	0	0	0	0	0	0	0	no	NA	NA	NA	NA	NA	ENSMUSG00000088159	snoRNA	NA	NA	NA	NA
	XLOC_001525	1	15268798	15269797	-	processed_pseudogene	NA	FALSE	none	999	0	3.32409	protein_coding	0.916462	2.32068	0.88799	0	0	2.11536	0.932091	0	0	0	no	NA	NA	NA	NA	NA	ENSMUSG00000073737	processed_pseudogene	NA	NA	NA	NA
	XLOC_001526	1	15685934	15686046	-	snoRNA	NA	FALSE	none	112	0	NA	lncRNA	0	0	0	0	0	0	0	0	0	0	no	NA	NA	NA	NA	NA	ENSMUSG00000088829	snoRNA	NA	NA	NA	NA
	XLOC_001527	1	15853861	15892722	-	protein_coding	NA	FALSE	none	2748	384	NA	protein_coding	0	0	0	0	1.04064	2.11536	4.66046	3.97098	8.56847	2.89726	no	NA	NA	NA	NA	NA	ENSMUSG00000032719	protein_coding	NA	NA	NA	NA
	XLOC_001528	1	16065978	16093325	-	protein_coding	NA	FALSE	none	2063	551	NA	protein_coding	0	0	1.77598	3.09426	4.16255	2.11536	4.66046	5.95647	2.85616	4.82876	no	mRNA	NA	NA	NA	NA	ENSMUSG00000067795	protein_coding	NA	NA	NA	NA
	XLOC_001529	1	16097960	16098876	-	NA	NA	FALSE	none	916	399	NA	lncRNA	18.3292	19.7258	13.3198	8.25136	23.9347	9.51913	12.1172	26.8041	9.52052	7.72602	no	NA	NA	NA	NA	NA	NA	NA	NA	NA	NA	NA
	XLOC_001530	1	16101294	16104662	-	protein_coding	NA	FALSE	protein_coding	1254	26	0.764321	protein_coding	39523.3	28578	30440.3	28425.9	13935.2	17493	17653.8	12368.6	17480.6	17061	yes	mRNA	27	353	92	822	ENSMUSG00000043716	protein_coding	1069.1	-0.416286	923.366	-0.494915
	XLOC_001531	1	16136179	16136268	-	lncRNA	NA	FALSE	none	89	0	NA	lncRNA	0	0	0	0	0	0	0	0	0	0	no	NA	NA	NA	NA	NA	Necsulea_blastnGorilla.Locus_18377	Overlap	NA	NA	NA	NA
	XLOC_001532	1	16228673	16520112	-	nonsense_mediated_decay;protein_coding	NA	FALSE	none	6694	400	0.923931	protein_coding	126.472	117.194	133.198	204.221	227.9	200.959	219.974	308.744	241.821	262.685	no	NA	NA	NA	NA	NA	ENSMUSG00000025920	nonsense_mediated_decay,protein_coding	NA	NA	36.2057	-0.0857726
	XLOC_001533	1	16540789	16619668	-	nonsense_mediated_decay;protein_coding	NA	FALSE	none	5067	424	0.442554	protein_coding	310.68	363.186	230.877	226.912	223.737	209.421	347.67	324.628	377.013	457.767	no	NA	NA	NA	NA	NA	ENSMUSG00000025939	nonsense_mediated_decay,protein_coding	53.6547	0.0201724	139.546	-0.153615
	XLOC_001534	1	16638344	16657270	-	protein_coding	NA	FALSE	protein_coding	5654	1447	1.34625	protein_coding	1152.91	927.111	1268.05	1161.38	592.123	740.377	750.334	644.291	725.464	831.513	yes	mRNA	13	387	55	421	ENSMUSG00000079658	protein_coding	223.254	0.0569528	296.362	0.0933744
	XLOC_001535	1	16768269	16770138	-	protein_coding	NA	FALSE	protein_coding	1869	0	1.7917	protein_coding	10.0811	4.64136	3.55196	5.1571	4.16255	3.17304	1.86418	0.992745	4.76026	1.9315	no	mRNA	NA	NA	NA	NA	ENSMUSG00000091020	protein_coding	NA	NA	NA	NA
	XLOC_001536	1	16986212	16988489	-	NA	NA	TRUE	lincRNA	2277	546	NA	lncRNA	0	0	2.66397	3.09426	21.8534	19.0383	11.1851	13.8984	5.71231	3.86301	no	lncRNA	NA	NA	NA	NA	NA	NA	NA	NA	NA	NA
	XLOC_001537	1	16988565	16990066	-	NA	NA	FALSE	none	1501	430	NA	lncRNA	0	0	0.88799	1.03142	6.24383	4.23072	2.79627	4.96372	3.80821	0.965752	no	NA	NA	NA	NA	NA	NA	NA	NA	NA	NA	NA
	XLOC_001538	1	16990681	16991413	-	NA	NA	FALSE	none	732	257	NA	lncRNA	0	0	0	1.03142	3.12191	1.05768	0	7.94196	0	0	no	NA	NA	NA	NA	NA	NA	NA	NA	NA	NA	NA
	XLOC_001539	1	16994805	17097889	-	protein_coding	NA	FALSE	protein_coding	5130	443	NA	protein_coding	85.2309	52.2153	273.501	366.154	438.109	390.284	208.788	177.701	137.096	81.1232	yes	mRNA	8	138	29	201	ENSMUSG00000042686	protein_coding	48.349	0.0173551	44.6124	0.0941625
	XLOC_001540	1	17636056	17637730	-	lncRNA	NA	TRUE	none	925	625	NA	lncRNA	0	0	0	0	0	0	0	0	0	0	no	NA	NA	NA	NA	NA	Necsulea_Locus_81493	lncRNA	NA	NA	NA	NA
	XLOC_001541	1	18115190	18145902	-	protein_coding	NA	FALSE	none	1369	154	NA	protein_coding	0	0	0	0	0	0	0	0	0	0	no	NA	NA	NA	NA	NA	ENSMUSG00000025774	protein_coding	NA	NA	NA	NA
	XLOC_001542	1	18210052	18223564	-	unprocessed_pseudogene	NA	FALSE	none	219	0	NA	lncRNA	0	0	0	0	0	0	0	0.992745	1.9041	0	no	NA	NA	NA	NA	NA	ENSMUSG00000070977	unprocessed_pseudogene	NA	NA	NA	NA
	XLOC_001543	1	18236472	18237443	-	protein_coding	NA	FALSE	none	258	0	NA	lncRNA	0	0	0	0	0	0	0	0	0	0	no	NA	NA	NA	NA	NA	ENSMUSG00000073735	protein_coding	NA	NA	NA	NA
	XLOC_001544	1	18250979	18265138	-	protein_coding	NA	FALSE	none	610	72	NA	protein_coding	0	0	0	0	0	0	0	0	0	0	no	NA	NA	NA	NA	NA	NA	NA	NA	NA	NA	NA
	XLOC_001545	1	18528840	18528916	-	lncRNA	NA	TRUE	none	76	0	NA	lncRNA	0	0	0	0	0	0	0	0	0	0	no	NA	NA	NA	NA	NA	Necsulea_blastnOrangutan.Locus_122085	TooShort	NA	NA	NA	NA
	XLOC_001546	1	18969761	18969833	-	snoRNA	NA	FALSE	none	72	0	NA	lncRNA	0	0	0	0	0	0	0	0	0	0	no	NA	NA	NA	NA	NA	ENSMUSG00000088800	snoRNA	NA	NA	NA	NA
	XLOC_001547	1	18973365	18973481	-	lncRNA	NA	FALSE	none	116	0	NA	lncRNA	0	0	0	0	0	0	0	0	0	0	no	NA	NA	NA	NA	NA	Necsulea_blastnHuman.ENSG00000230472	Overlap	NA	NA	NA	NA
	XLOC_001548	1	19153309	19153966	-	processed_pseudogene;pseudogene	NA	FALSE	none	657	101	3.04816	protein_coding	363.835	287.764	338.324	356.871	151.933	287.689	197.603	213.44	206.595	227.918	no	NA	NA	NA	NA	NA	ENSMUSG00000060128	processed_pseudogene,pseudogene	NA	NA	NA	NA
	XLOC_001549	1	19513854	19513919	-	snoRNA	NA	FALSE	none	65	0	NA	lncRNA	0	0	0	0	0	0	0	0	0	0	no	NA	NA	NA	NA	NA	ENSMUSG00000084668	snoRNA	NA	NA	NA	NA
	XLOC_001550	1	19921309	19921399	-	miRNA	NA	FALSE	none	90	85	NA	lncRNA	0	0	0	0	0	0	0	0	0	0	no	NA	NA	NA	NA	NA	ENSMUSG00000077860	miRNA	NA	NA	NA	NA
	XLOC_001551	1	20057778	20618064	-	protein_coding	processed_pseudogene;snRNA	FALSE	none	13084	60	NA	protein_coding	46.7395	11.6034	85.247	76.3251	59.3164	35.9612	66.1785	43.6808	35.2259	25.1096	no	NA	NA	NA	NA	NA	ENSMUSG00000043760	protein_coding	NA	NA	NA	NA
	XLOC_001552	1	20444257	20444560	-	processed_pseudogene	protein_coding	FALSE	none	303	0	0.932301	lncRNA	0	0	0	0	0	1.05768	0	0	0	0	no	NA	NA	NA	NA	NA	ENSMUSG00000090142	processed_pseudogene	NA	NA	NA	NA
	XLOC_001553	1	20444810	20444912	-	snRNA	protein_coding	FALSE	none	102	102	0.0747684	lncRNA	0	0	0	0	0	0	0.932091	0.992745	0	0	no	NA	NA	NA	NA	NA	ENSMUSG00000070175	snRNA	NA	NA	NA	NA
	XLOC_001554	1	20777150	20784270	-	protein_coding	NA	FALSE	protein_coding	1173	0	NA	protein_coding	1.83292	3.48102	5.32794	3.09426	7.28447	2.11536	1.86418	3.97098	3.80821	3.86301	no	mRNA	NA	NA	NA	NA	ENSMUSG00000041872	protein_coding	NA	NA	NA	NA
	XLOC_001555	1	20785826	20786628	-	NA	NA	FALSE	none	802	9	NA	lncRNA	0	1.16034	0.88799	0	7.28447	3.17304	5.59255	3.97098	1.9041	0.965752	no	NA	NA	NA	NA	NA	NA	NA	NA	NA	NA	NA
	XLOC_001556	1	20789444	20790680	-	NA	NA	TRUE	lincRNA	1236	504	NA	lncRNA	0.916462	2.32068	0.88799	1.03142	14.5689	1.05768	5.59255	4.96372	2.85616	5.79451	no	NA	NA	NA	NA	NA	NA	NA	NA	NA	NA	NA
	XLOC_001557	1	20802973	20820278	-	protein_coding	NA	FALSE	protein_coding	2991	90	1.51067	protein_coding	7686.36	6647.58	6722.08	5132.34	3416.41	4093.23	2942.61	2561.28	2336.34	2319.74	yes	mRNA	69	1432	27	456	ENSMUSG00000041859	protein_coding	664.783	0.0415503	456.654	-0.0448682
	XLOC_001558	1	20842534	20842666	-	snoRNA	NA	FALSE	none	132	77	NA	lncRNA	0	0	0	0	0	0	0	0	0	0	no	NA	NA	NA	NA	NA	ENSMUSG00000088858	snoRNA	NA	NA	NA	NA
	XLOC_001559	1	20866733	20869939	-	lncRNA	NA	TRUE	none	332	23	NA	lncRNA	0	0	0	0	0	0	0	0	0	0	no	NA	NA	NA	NA	NA	Necsulea_Locus_82119|Necsulea_Locus_81072	lncRNA	NA	NA	NA	NA
	XLOC_001560	1	20888649	20890473	-	lncRNA	NA	FALSE	none	1120	404	NA	lncRNA	0.916462	2.32068	0	0	0	2.11536	0	0	4.76026	0.965752	no	NA	NA	NA	NA	NA	Ensembl_ENSMUSG00000097934|Necsulea_ENSMUSG00000087078	Overlap	NA	NA	NA	NA
	XLOC_001561	1	20915409	20915540	-	snoRNA	NA	FALSE	none	131	0	NA	lncRNA	0	0	0	0	0	0	0	0	0	0	no	NA	NA	NA	NA	NA	ENSMUSG00000077314	snoRNA	NA	NA	NA	NA
	XLOC_001562	1	20996135	21079229	-	protein_coding	NA	FALSE	protein_coding	6969	331	2.8946	protein_coding	64.1523	126.477	61.2713	107.268	202.924	176.633	331.825	269.034	216.116	136.171	yes	mRNA	6	172	6	169	ENSMUSG00000041779	protein_coding	20.2979	-0.200616	146.259	-0.0881569
	XLOC_001563	1	21189174	21193282	-	lncRNA	NA	TRUE	none	808	29	NA	lncRNA	0	2.32068	4.43995	5.1571	4.16255	2.11536	0	0	0	0	no	NA	NA	NA	NA	NA	Necsulea_CUFF.126109	lncRNA	NA	NA	NA	NA
	XLOC_001564	1	21285607	21298127	-	transcribed_unprocessed_pseudogene	NA	FALSE	none	672	0	NA	protein_coding	0	0	0	0	0	0	0	0.992745	0	0	no	NA	NA	NA	NA	NA	ENSMUSG00000025936	transcribed_unprocessed_pseudogene	NA	NA	NA	NA
	XLOC_001565	1	21312516	21316320	-	unprocessed_pseudogene	NA	FALSE	none	439	0	NA	lncRNA	0	0	0	0	0	0	0	0	0	0	no	NA	NA	NA	NA	NA	ENSMUSG00000093963	unprocessed_pseudogene	NA	NA	NA	NA
	XLOC_001566	1	21398402	21961942	-	nonsense_mediated_decay;protein_coding	processed_pseudogene;pseudogene	FALSE	none	7695	223	NA	protein_coding	0.916462	3.48102	8.8799	17.5341	12.4877	10.5768	43.8083	65.5212	80.9245	90.7807	no	NA	NA	NA	NA	NA	ENSMUSG00000028033	nonsense_mediated_decay,protein_coding	NA	NA	NA	NA
	XLOC_001567	1	21511869	21513127	-	processed_pseudogene;pseudogene	nonsense_mediated_decay;protein_coding	FALSE	none	1258	0	1.79409	protein_coding	2.74938	0	0.88799	1.03142	0	0	0	4.96372	0.952052	3.86301	no	NA	NA	NA	NA	NA	ENSMUSG00000082935	processed_pseudogene,pseudogene	NA	NA	NA	NA
	XLOC_001568	1	22286055	22805994	-	protein_coding	NA	FALSE	protein_coding	7660	229	0.28778	protein_coding	42.1572	16.2447	36.4076	88.7021	48.91	25.3843	25.1665	30.7751	13.3287	19.315	no	mRNA	NA	NA	NA	NA	ENSMUSG00000041670	protein_coding	NA	NA	NA	NA
	XLOC_001569	1	23049706	23059875	-	lncRNA	NA	TRUE	none	567	302	NA	lncRNA	0	0	0	0	0	0	0	0	0	0	no	NA	NA	NA	NA	NA	Necsulea_CUFF.125832	lncRNA	NA	NA	NA	NA
	XLOC_001570	1	23100472	23102253	-	protein_coding	NA	FALSE	none	1781	167	0.434095	protein_coding	0	0	0	0	0	0	0	0	0	0	no	NA	NA	NA	NA	NA	ENSMUSG00000073730	protein_coding	NA	NA	NA	NA
	XLOC_001571	1	23255986	23256406	-	protein_coding	NA	FALSE	none	420	98	NA	lncRNA	0	1.16034	0	0	1.04064	0	0	0.992745	0	0.965752	no	NA	NA	NA	NA	NA	ENSMUSG00000073729	protein_coding	NA	NA	NA	NA
	XLOC_001572	1	23366322	23383184	-	protein_coding	NA	FALSE	protein_coding	4954	457	0.120602	protein_coding	131.97	107.912	155.398	180.498	207.087	180.863	146.338	145.934	138.048	101.404	yes	mRNA	1	66	17	42	ENSMUSG00000026158	protein_coding	13.1021	-0.0691551	20.1319	-0.155618
	XLOC_001573	1	23845624	23922317	-	protein_coding	NA	FALSE	protein_coding	2456	159	1.52831	protein_coding	283.187	433.967	350.756	329.023	589.001	651.531	587.218	645.284	540.766	528.267	yes	mRNA	8	83	22	90	ENSMUSG00000026155	protein_coding	NA	NA	20.3276	-0.517444
	XLOC_001574	1	23995938	24005656	-	protein_coding	NA	FALSE	none	683	0	1.29153	protein_coding	103.56	135.76	133.198	103.142	59.3164	106.826	109.987	80.4123	113.294	115.89	no	NA	NA	NA	NA	NA	ENSMUSG00000026154	protein_coding	39.4099	0.0610407	98.08	0.0359584
	XLOC_001575	1	24010590	24100341	-	protein_coding	NA	FALSE	protein_coding	9599	427	0.512969	protein_coding	362.002	438.608	506.154	660.109	997.972	982.586	1000.13	1385.87	1240.52	1161.8	yes	mRNA	17	318	16	158	ENSMUSG00000026153	protein_coding	25.1652	0.0424869	104.397	0.277646
	XLOC_001576	1	24263993	24587472	-	protein_coding	snoRNA	FALSE	none	4428	45	NA	lncRNA	0	0	0	0	0	7.40377	0	0.992745	0.952052	1.9315	no	NA	NA	NA	NA	NA	ENSMUSG00000026141	protein_coding	NA	NA	NA	NA
	XLOC_001577	1	24548840	24548977	-	snoRNA	protein_coding	FALSE	none	137	0	NA	lncRNA	0	0	0	0	0	0	0	0	0	0	no	NA	NA	NA	NA	NA	ENSMUSG00000077463	snoRNA	NA	NA	NA	NA
	XLOC_001578	1	24612403	24612700	-	protein_coding	NA	FALSE	none	297	0	0.167596	lncRNA	0	1.16034	0	0	0	0	0	0	0	0	no	NA	NA	NA	NA	NA	ENSMUSG00000067736	protein_coding	NA	NA	NA	NA
	XLOC_001579	1	24613073	24613286	-	NA	NA	FALSE	none	213	0	0.0015401	lncRNA	0	0	0	2.06284	0	0	0	1.98549	0	1.9315	no	NA	NA	NA	NA	NA	NA	NA	NA	NA	NA	NA
	XLOC_001580	1	25026581	25027270	-	lncRNA	NA	TRUE	none	485	287	NA	lncRNA	0	0	0	0	0	0	0	0	0	0	no	NA	NA	NA	NA	NA	Necsulea_Locus_82620|Necsulea_Locus_80517	lncRNA	NA	NA	NA	NA
	XLOC_001581	1	25067475	25830134	-	protein_coding	snRNA	FALSE	none	6453	108	NA	protein_coding	0	2.32068	10.6559	25.7855	35.3817	37.0188	46.6046	58.572	214.212	213.431	no	NA	NA	NA	NA	NA	ENSMUSG00000033569	protein_coding	NA	NA	NA	NA
	XLOC_001582	1	25279444	25279551	-	snRNA	protein_coding	FALSE	none	107	107	NA	lncRNA	0	0	0	0	1.04064	0	0.932091	0	0.952052	0	no	NA	NA	NA	NA	NA	ENSMUSG00000096866	snRNA	NA	NA	NA	NA
	XLOC_001583	1	25896062	25903641	-	lncRNA	NA	TRUE	none	444	12	NA	lncRNA	0	0	0	0	0	0	0	0	0	0	no	NA	NA	NA	NA	NA	Necsulea_Locus_82225	lncRNA	NA	NA	NA	NA
	XLOC_001584	1	26529135	26529211	-	lncRNA	NA	TRUE	none	76	0	NA	lncRNA	0	0	0	0	0	0	0	0	0	0	no	NA	NA	NA	NA	NA	Necsulea_blastnHuman.ENSG00000223504	TooShort	NA	NA	NA	NA
	XLOC_001585	1	26681813	26687460	-	protein_coding	NA	FALSE	none	4318	11	NA	protein_coding	2.74938	0	0	0	0	0	0	0	0	0	no	NA	NA	NA	NA	NA	ENSMUSG00000073722	protein_coding	NA	NA	NA	NA
	XLOC_001586	1	26959102	26959221	-	rRNA	NA	FALSE	none	119	119	0.556949	lncRNA	0	0	0	0	0	0	0	0	0	0	no	NA	NA	NA	NA	NA	ENSMUSG00000095256	rRNA	NA	NA	NA	NA
	XLOC_001587	1	27468045	27469350	-	lncRNA	NA	TRUE	none	224	153	NA	lncRNA	0	0	0	0	0	0	0	0	0	0	no	NA	NA	NA	NA	NA	Necsulea_Locus_81842	lncRNA	NA	NA	NA	NA
	XLOC_001588	1	28580497	28580768	-	processed_pseudogene	NA	FALSE	none	271	0	1.1436	lncRNA	0	0	0	0	0	0	0	0	0	0	no	NA	NA	NA	NA	NA	ENSMUSG00000086240	processed_pseudogene	NA	NA	NA	NA
	XLOC_001589	1	28776143	28780252	-	protein_coding	NA	FALSE	none	2860	0	NA	protein_coding	0	0	0	0	0	0	0	0	0	0	no	NA	NA	NA	NA	NA	ENSMUSG00000048411	protein_coding	NA	NA	NA	NA
	XLOC_001590	1	28800237	28802721	-	processed_pseudogene	NA	FALSE	none	2484	502	1.57378	lncRNA	0	0	0	0	0	0	0	0	0.952052	0	no	NA	NA	NA	NA	NA	ENSMUSG00000081557	processed_pseudogene	NA	NA	NA	NA
	XLOC_001591	1	29280963	29281075	-	lncRNA	NA	TRUE	none	112	112	NA	lncRNA	0	0	0	0	0	0	0	0	0	0	no	NA	NA	NA	NA	NA	Ensembl_ENSMUSG00000064433	TooShort	NA	NA	NA	NA
	XLOC_001592	1	29361274	29361370	-	miRNA	NA	FALSE	none	96	60	NA	lncRNA	0	0	0	0	0	0	0	0	0	0	no	NA	NA	NA	NA	NA	ENSMUSG00000080391	miRNA	NA	NA	NA	NA
	XLOC_001593	1	30121668	30122893	-	lncRNA	NA	TRUE	none	485	154	NA	lncRNA	0	0	0	0	0	0	0	0	0	0	no	NA	NA	NA	NA	NA	Necsulea_Locus_82257	lncRNA	NA	NA	NA	NA
	XLOC_001594	1	30127746	30138316	-	lncRNA	NA	TRUE	none	740	268	NA	lncRNA	0	0	0	0	0	0	0	0	0.952052	0	no	NA	NA	NA	NA	NA	Necsulea_Locus_81647	lncRNA	NA	NA	NA	NA
	XLOC_001595	1	30173109	30176379	-	lncRNA	NA	TRUE	none	890	224	NA	lncRNA	0	0	0	0	0	0	0	0	0	0	no	NA	NA	NA	NA	NA	Necsulea_Locus_81790	lncRNA	NA	NA	NA	NA
	XLOC_001596	1	30180724	30181647	-	lncRNA	NA	TRUE	none	266	0	NA	lncRNA	0	0	0	0	0	0	0	0	0	0	no	NA	NA	NA	NA	NA	Necsulea_Locus_82007	lncRNA	NA	NA	NA	NA
	XLOC_001597	1	30333290	30333397	-	miRNA	NA	FALSE	none	107	107	NA	lncRNA	0	0	0	0	0	0	0	0	0	0	no	NA	NA	NA	NA	NA	ENSMUSG00000098883	miRNA	NA	NA	NA	NA
	XLOC_001598	1	30633882	30650610	-	lncRNA	NA	TRUE	none	229	56	NA	lncRNA	0	0	0	0	0	0	0	0	0	0	no	NA	NA	NA	NA	NA	Necsulea_Locus_82261	lncRNA	NA	NA	NA	NA
	XLOC_001599	1	30718553	30719961	-	protein_coding	NA	FALSE	none	1166	131	NA	lncRNA	0	0	0	0	0	0	0	0	0	0	no	NA	NA	NA	NA	NA	ENSMUSG00000053185	protein_coding	NA	NA	NA	NA
	XLOC_001600	1	30802107	30874159	-	protein_coding	NA	FALSE	protein_coding	8816	334	0.959117	protein_coding	3035.32	2818.46	3295.33	3356.24	2922.11	2906.51	2817.71	2824.36	2564.83	2298.49	yes	mRNA	37	537	72	359	ENSMUSG00000048874	protein_coding	148.44	-0.108038	298.51	-0.0444283
	XLOC_001601	1	30866334	30866957	-	NA	protein_coding	FALSE	none	623	132	NA	lncRNA	10.0811	23.2068	14.2078	14.4399	54.1132	32.7881	26.0986	44.6735	38.0821	28.9726	no	NA	NA	NA	NA	NA	NA	NA	NA	NA	NA	NA
	XLOC_001602	1	30867049	30867567	-	NA	protein_coding	FALSE	none	518	30	NA	lncRNA	4.58231	3.48102	11.5439	5.1571	35.3817	22.2113	19.5739	30.7751	18.089	20.2808	no	NA	NA	NA	NA	NA	NA	NA	NA	NA	NA	NA
	XLOC_001603	1	30867641	30872533	-	NA	protein_coding	FALSE	none	4892	1308	NA	lncRNA	76.9828	145.042	162.502	170.184	393.361	306.727	253.529	353.417	281.808	267.513	no	NA	NA	NA	NA	NA	NA	NA	NA	NA	NA	NA
	XLOC_001604	1	30872608	30872931	-	NA	protein_coding	TRUE	none	323	0	NA	lncRNA	7.33169	12.7637	15.9838	18.5656	38.5036	22.2113	29.8269	22.8331	14.2808	21.2466	no	NA	NA	NA	NA	NA	NA	NA	NA	NA	NA	NA
	XLOC_001605	1	30940302	30949910	-	protein_coding	NA	FALSE	protein_coding	4284	334	0.379394	protein_coding	3700.67	3749.06	3434.74	3591.4	3288.42	3564.38	3484.16	3401.14	2968.5	3319.29	yes	mRNA	1	53	25	406	ENSMUSG00000026064	protein_coding	72.3356	-0.129201	199.269	0.0319058
	XLOC_001606	1	30976949	30978965	-	protein_coding	NA	FALSE	protein_coding	1141	119	NA	protein_coding	0.916462	2.32068	0.88799	0	0	0	6.52464	0.992745	1.9041	1.9315	no	NA	NA	NA	NA	NA	ENSMUSG00000086151	protein_coding	NA	NA	NA	NA
	XLOC_001607	1	30986224	30986953	-	unprocessed_pseudogene	NA	FALSE	none	729	36	NA	protein_coding	0	0	0.88799	0	0	0	0.932091	0	0	0	no	NA	NA	NA	NA	NA	ENSMUSG00000086726	unprocessed_pseudogene	NA	NA	NA	NA
	XLOC_001608	1	30997866	30999905	-	protein_coding	NA	FALSE	protein_coding	1164	110	NA	protein_coding	0.916462	1.16034	0	1.03142	0	0	6.52464	0.992745	0	0	no	NA	NA	NA	NA	NA	ENSMUSG00000087346	protein_coding	NA	NA	NA	NA
	XLOC_001609	1	31019818	31044951	-	lncRNA	NA	TRUE	none	1114	266	NA	lncRNA	0	0	0	0	0	0	0	0	0	0	no	NA	NA	NA	NA	NA	Necsulea_Locus_82369	lncRNA	NA	NA	NA	NA
	XLOC_001610	1	31122724	31122862	-	rRNA	NA	FALSE	none	138	0	NA	lncRNA	0	0	0	0	0	0	0	0	0	0	no	NA	NA	NA	NA	NA	NA	NA	NA	NA	NA	NA
	XLOC_001611	1	31141077	31222661	-	protein_coding	NA	FALSE	none	1546	303	NA	lncRNA	0	0	0	1.03142	1.04064	1.05768	0.932091	0	0.952052	0	no	NA	NA	NA	NA	NA	ENSMUSG00000086727	protein_coding	NA	NA	NA	NA
	XLOC_001612	1	31259592	31259719	-	snoRNA	NA	FALSE	none	127	0	NA	lncRNA	0	0	0	0	0	0	0	0	0	0	no	NA	NA	NA	NA	NA	ENSMUSG00000077664	snoRNA	NA	NA	NA	NA
	XLOC_001613	1	31656631	31656738	-	snRNA	NA	FALSE	none	107	104	NA	lncRNA	0	0	0	0	0	0	0	0	0	0	no	NA	NA	NA	NA	NA	ENSMUSG00000088620	snRNA	NA	NA	NA	NA
	XLOC_001614	1	32117415	32122056	-	lncRNA	NA	TRUE	none	300	152	NA	lncRNA	0	0	0	0	0	0	0	0	0	0	no	NA	NA	NA	NA	NA	Necsulea_Locus_82527	lncRNA	NA	NA	NA	NA
	XLOC_001615	1	32213132	32213239	-	snRNA	NA	FALSE	none	107	107	NA	lncRNA	0	0	0	0	0	0	0	0	0	0	no	NA	NA	NA	NA	NA	ENSMUSG00000064688	snRNA	NA	NA	NA	NA
	XLOC_001616	1	32519562	32520999	-	processed_pseudogene	NA	FALSE	none	1437	0	NA	protein_coding	0	0	0	0	0	0	0	0	0	0	no	NA	NA	NA	NA	NA	ENSMUSG00000049830	processed_pseudogene	NA	NA	NA	NA
	XLOC_001617	1	32543545	32547293	-	protein_coding	NA	FALSE	none	3748	27	NA	protein_coding	0	0	0	0	0	0	0	1.98549	0.952052	0	no	NA	NA	NA	NA	NA	ENSMUSG00000091318	protein_coding	NA	NA	NA	NA
	XLOC_001618	1	32568358	32568421	-	snRNA	NA	FALSE	none	63	63	NA	lncRNA	0	0	0	0	0	0	0	0	0	0	no	NA	NA	NA	NA	NA	ENSMUSG00000089489	snRNA	NA	NA	NA	NA
	XLOC_001619	1	33201596	33201791	-	lncRNA	NA	TRUE	none	195	0	NA	lncRNA	0	0	0	0	0	0	0	0	0	0	no	NA	NA	NA	NA	NA	Necsulea_blastnGorilla.Locus_440843	TooShort	NA	NA	NA	NA
	XLOC_001620	1	33453810	33669786	-	protein_coding	NA	FALSE	protein_coding	1993	0	1.69185	protein_coding	713.007	678.798	777.879	595.129	316.354	344.804	395.207	354.41	328.458	431.691	yes	mRNA	3	162	13	123	ENSMUSG00000026134	protein_coding	118.476	0.20455	70.076	0.086194
	XLOC_001621	1	33745483	33757819	-	protein_coding	NA	FALSE	protein_coding	1960	0	1.26854	protein_coding	30.2432	48.7342	84.359	121.708	125.917	184.036	368.176	238.259	283.712	249.164	yes	mRNA	4	38	7	162	ENSMUSG00000042215	protein_coding	14.4239	0.220133	68.5802	-0.0373823
	XLOC_001622	1	33760471	33814595	-	nonsense_mediated_decay;protein_coding	NA	FALSE	none	18994	2498	0.626932	protein_coding	901.798	1225.32	1268.05	1128.37	1590.09	1269.22	1373.9	1877.28	1731.78	1721.94	no	NA	NA	NA	NA	NA	ENSMUSG00000042197	nonsense_mediated_decay,protein_coding	87.5929	0.058063	218.082	0.232695
	XLOC_001623	1	33835898	33838914	-	processed_pseudogene	NA	FALSE	none	3016	0	0.621755	protein_coding	26.5774	27.8481	15.9838	5.1571	2.08128	0	3.72837	0.992745	0	0	no	NA	NA	NA	NA	NA	ENSMUSG00000081402	processed_pseudogene	NA	NA	NA	NA
	XLOC_001624	1	33852051	33907816	-	protein_coding	NA	FALSE	protein_coding	2487	158	NA	protein_coding	27.4938	40.6119	14.2078	10.3142	23.9347	7.40377	23.3023	23.8259	25.7054	18.3493	no	mRNA	NA	NA	NA	NA	ENSMUSG00000042182	protein_coding.neuron.differentiation	NA	NA	NA	NA
	XLOC_001625	1	33981409	33981502	-	snRNA	NA	FALSE	none	93	84	0.192177	lncRNA	0	0	0	0	0	0	0	0	0	0	no	NA	NA	NA	NA	NA	ENSMUSG00000084506	snRNA	NA	NA	NA	NA
	XLOC_001626	1	34433120	34433199	-	miRNA	NA	FALSE	none	79	0	NA	lncRNA	0.916462	1.16034	0	0	0	0	0	0	0	0	no	NA	NA	NA	NA	NA	ENSMUSG00000092852	miRNA	NA	NA	NA	NA
	XLOC_001627	1	34436670	34439672	-	protein_coding	NA	FALSE	protein_coding	1704	110	1.13045	protein_coding	514.135	306.33	354.308	249.604	127.998	168.171	214.381	200.534	305.609	303.246	no	mRNA	NA	NA	NA	NA	ENSMUSG00000042111	protein_coding	29.5708	-0.0372258	34.3564	-0.069572
	XLOC_001628	1	34543974	34560943	-	protein_coding	NA	FALSE	none	2098	42	NA	protein_coding	0	0	0	0	0	0	0	0	0	0	no	NA	NA	NA	NA	NA	ENSMUSG00000037529	protein_coding	NA	NA	NA	NA
	XLOC_001629	1	34579223	34579613	-	protein_coding	NA	FALSE	none	390	48	NA	lncRNA	0	0	0	0	0	0	0	0	0.952052	0	no	NA	NA	NA	NA	NA	ENSMUSG00000045815	protein_coding	NA	NA	NA	NA
	XLOC_001630	1	34640405	34643289	-	lncRNA	NA	TRUE	none	555	270	NA	lncRNA	0	0	0	0	0	0	0	0	0.952052	0	no	NA	NA	NA	NA	NA	Guttman_lincRNA_221	lncRNA	NA	NA	NA	NA
	XLOC_001631	1	34662985	34666995	-	lncRNA	NA	TRUE	none	810	150	NA	lncRNA	0	0	0	0	0	0	0	0	0	0	no	NA	NA	NA	NA	NA	Necsulea_Locus_82518	lncRNA	NA	NA	NA	NA
	XLOC_001632	1	34813218	34843065	-	protein_coding	NA	FALSE	protein_coding	5094	196	0.101005	protein_coding	1997.89	2092.09	1102	1287.21	1113.48	1353.83	2306.93	2442.15	2656.23	3154.15	yes	mRNA	51	540	40	268	ENSMUSG00000037503	protein_coding	28.3048	0.206063	60.88	-0.0585881
	XLOC_001633	1	35178955	35179084	-	snoRNA	NA	FALSE	none	129	0	NA	lncRNA	0	0	0	0	0	0	0	0	0	0	no	NA	NA	NA	NA	NA	ENSMUSG00000077231	snoRNA	NA	NA	NA	NA
	XLOC_001634	1	35624265	35627084	-	lncRNA	NA	TRUE	none	662	0	NA	lncRNA	0	0	0	0	0	0	0	0	0	0.965752	no	NA	NA	NA	NA	NA	Necsulea_Locus_81923	lncRNA	NA	NA	NA	NA
	XLOC_001635	1	35631767	35651496	-	lncRNA	NA	TRUE	none	766	0	NA	lncRNA	0	0	0	0	0	0	0	0	0	0	no	NA	NA	NA	NA	NA	Necsulea_Locus_81640	lncRNA	NA	NA	NA	NA
	XLOC_001636	1	36001460	36011020	-	lncRNA	NA	TRUE	lincRNA	2259	959	NA	lncRNA	33.9091	8.12237	11.5439	8.25136	3.12191	1.05768	0	1.98549	2.85616	0	no	lncRNA	NA	NA	NA	NA	Necsulea_Locus_81467|Guttman_lincRNA_224|Necsulea_Locus_81197	lncRNA	NA	NA	NA	NA
	XLOC_001637	1	36062371	36063145	-	NA	NA	TRUE	none	774	272	NA	lncRNA	10.9975	0	8.8799	12.377	0	3.17304	0.932091	0	0.952052	1.9315	no	NA	NA	NA	NA	NA	NA	NA	NA	NA	NA	NA
	XLOC_001638	1	36139743	36244305	-	nonsense_mediated_decay;protein_coding	miRNA	FALSE	none	9621	398	1.87455	protein_coding	2322.31	3482.18	1710.27	1858.62	1846.09	2175.65	2233.29	2099.66	1941.23	1944.06	no	NA	NA	NA	NA	NA	ENSMUSG00000037470	nonsense_mediated_decay,protein_coding	63.842	0.0506974	114.519	0.0735748
	XLOC_001639	1	36144251	36144313	-	miRNA	nonsense_mediated_decay;protein_coding	FALSE	none	62	0	NA	lncRNA	1.83292	3.48102	3.55196	3.09426	1.04064	2.11536	1.86418	1.98549	3.80821	3.86301	no	NA	NA	NA	NA	NA	ENSMUSG00000098752	miRNA	NA	NA	NA	NA
	XLOC_001640	1	36264601	36273425	-	protein_coding	NA	FALSE	protein_coding	3086	1011	NA	protein_coding	0	2.32068	4.43995	3.09426	4.16255	0	5.59255	17.8694	19.041	73.3972	no	mRNA	NA	NA	NA	NA	ENSMUSG00000047180	protein_coding	NA	NA	NA	NA
	XLOC_001641	1	36303603	36303680	-	lncRNA	NA	FALSE	none	77	0	NA	lncRNA	0	0	0	0	0	0	0	0	0	0	no	NA	NA	NA	NA	NA	Necsulea_blastnHuman.ENSG00000235480	Overlap	NA	NA	NA	NA
	XLOC_001642	1	36327226	36328188	-	NA	NA	FALSE	none	962	0	NA	lncRNA	0	2.32068	0	3.09426	5.20319	2.11536	1.86418	6.94921	1.9041	0.965752	no	NA	NA	NA	NA	NA	NA	NA	NA	NA	NA	NA
	XLOC_001643	1	36329913	36332816	-	NA	NA	FALSE	none	2903	958	NA	lncRNA	2.74938	6.96204	0	2.06284	15.6096	10.5768	12.1172	22.8331	8.56847	11.589	no	NA	NA	NA	NA	NA	NA	NA	NA	NA	NA	NA
	XLOC_001644	1	36335729	36369181	-	protein_coding	miRNA	FALSE	none	7649	794	0.462262	protein_coding	904.548	1058.23	524.802	509.521	785.682	746.723	782.025	898.434	965.381	931.951	no	NA	NA	NA	NA	NA	ENSMUSG00000010453	protein_coding	28.7096	-0.0370243	105.748	-0.0232828
	XLOC_001645	1	36348681	36348758	-	miRNA	protein_coding	FALSE	none	77	0	NA	lncRNA	0	0	0	0	0	0	0	0	0	0	no	NA	NA	NA	NA	NA	ENSMUSG00000098680	miRNA	NA	NA	NA	NA
	XLOC_001646	1	36417452	36445271	-	nonsense_mediated_decay;protein_coding	NA	FALSE	none	8463	605	1.89083	protein_coding	101.727	127.637	87.911	105.205	253.916	292.978	295.473	359.374	354.163	292.623	no	NA	NA	NA	NA	NA	ENSMUSG00000001143	nonsense_mediated_decay,protein_coding	NA	NA	12.2793	-0.397701
	XLOC_001647	1	36529599	36536910	-	protein_coding	NA	FALSE	protein_coding	4359	560	0.556949	protein_coding	16.4963	19.7258	24.8637	27.8483	42.6662	29.6151	54.0613	70.4849	63.7875	41.5274	no	mRNA	NA	NA	NA	NA	ENSMUSG00000067653	protein_coding	NA	NA	17.1689	0.265643
	XLOC_001648	1	36537222	36547224	-	protein_coding	NA	FALSE	protein_coding	2970	626	0.362962	protein_coding	54.9877	64.979	68.3752	54.6652	60.357	46.538	94.1412	73.4631	79.9724	56.0136	yes	mRNA	16	139	32	96	ENSMUSG00000079610	protein_coding	NA	NA	NA	NA
	XLOC_001649	1	36548641	36558606	-	protein_coding	NA	FALSE	protein_coding	5145	197	1.09941	protein_coding	15.5798	18.5654	50.6154	116.55	346.532	448.457	483.755	586.712	583.608	579.451	yes	mRNA	2	118	24	60	ENSMUSG00000026121	protein_coding	NA	NA	NA	NA
	XLOC_001650	1	36562679	36683183	-	nonsense_mediated_decay;protein_coding	NA	FALSE	none	2679	60	NA	protein_coding	244.695	214.663	126.983	74.2622	64.5196	29.6151	17.7097	21.8404	6.66437	6.76027	no	NA	NA	NA	NA	NA	ENSMUSG00000046337	nonsense_mediated_decay,protein_coding	39.8729	0.276562	NA	NA
	XLOC_001651	1	36698095	36714422	-	protein_coding	NA	FALSE	protein_coding	3693	194	0.538942	protein_coding	1845.75	1498	1249.4	1401.7	957.387	1264.99	1235.95	1174.42	1112.95	1291.21	yes	mRNA	47	970	17	97	ENSMUSG00000037351	protein_coding	42.216	0.0119751	60.5759	-0.0207503
	XLOC_001652	1	36765017	36765874	-	transcribed_processed_pseudogene	NA	FALSE	none	857	0	NA	lncRNA	0	0	0	0	0	0	0	0	0	0	no	NA	NA	NA	NA	NA	ENSMUSG00000097291	transcribed_processed_pseudogene	NA	NA	NA	NA
	XLOC_001653	1	36791501	36939654	-	protein_coding	NA	FALSE	protein_coding	7442	44	3.6367	protein_coding	585.619	1115.09	1464.29	1103.62	1849.21	1653.16	1166.05	1635.05	1240.52	1065.22	yes	mRNA	81	1745	63	731	ENSMUSG00000026116	protein_coding	105.947	-0.130745	99.4074	-0.0934185
	XLOC_001654	1	36957929	36958427	-	processed_pseudogene	NA	FALSE	none	498	0	0.580211	protein_coding	0	2.32068	0	0	1.04064	1.05768	0	0	0	0	no	NA	NA	NA	NA	NA	ENSMUSG00000080054	processed_pseudogene	NA	NA	NA	NA
	XLOC_001655	1	36984489	36985805	-	NA	NA	TRUE	lincRNA	1316	557	NA	lncRNA	8.24815	0	11.5439	3.09426	1.04064	2.11536	0	0	0.952052	0	no	lncRNA	NA	NA	NA	NA	NA	NA	NA	NA	NA	NA
	XLOC_001656	1	37417083	37430103	-	protein_coding	NA	FALSE	protein_coding	3863	1148	0.105649	lncRNA	1363.69	1345.99	717.496	703.428	558.823	929.702	884.555	777.319	735.936	635.465	no	mRNA	NA	NA	NA	NA	ENSMUSG00000026112	protein_coding	95.1344	0.366581	179.19	0.301025
	XLOC_001657	1	37439196	37541048	-	nonsense_mediated_decay;protein_coding	processed_pseudogene	FALSE	none	7659	662	NA	protein_coding	198.872	234.389	249.525	264.043	203.965	149.133	219.041	193.585	172.321	141.966	no	NA	NA	NA	NA	NA	ENSMUSG00000026110	nonsense_mediated_decay,protein_coding	19.3702	0.139303	55.1487	0.25611
	XLOC_001658	1	37487192	37488982	-	processed_pseudogene	nonsense_mediated_decay;protein_coding	FALSE	none	1790	18	NA	lncRNA	0.916462	2.32068	4.43995	5.1571	13.5283	4.23072	4.66046	10.9202	6.66437	1.9315	no	NA	NA	NA	NA	NA	ENSMUSG00000087233	processed_pseudogene	NA	NA	NA	NA
	XLOC_001659	1	37554017	37585836	-	lncRNA	NA	TRUE	none	102	0	NA	lncRNA	0	0	0	0	0	0	0	0	0	0	no	NA	NA	NA	NA	NA	Guttman_lincRNA_226|Necsulea_CUFF.126972	lncRNA	NA	NA	NA	NA
	XLOC_001660	1	37611676	37720094	-	protein_coding	NA	FALSE	protein_coding	5305	61	NA	protein_coding	18.3292	23.2068	10.6559	19.597	22.894	42.3072	25.1665	54.601	45.6985	42.4931	no	mRNA	NA	NA	NA	NA	ENSMUSG00000026090	protein_coding	NA	NA	NA	NA
	XLOC_001661	1	37754571	37865298	-	nonsense_mediated_decay;protein_coding	NA	FALSE	none	6754	333	0.459682	protein_coding	43.9902	27.8481	37.2956	45.3825	73.8853	68.7493	96.9375	73.4631	125.671	129.411	no	NA	NA	NA	NA	NA	ENSMUSG00000060771	nonsense_mediated_decay,protein_coding	NA	NA	NA	NA
	XLOC_001662	1	37874800	37890411	-	protein_coding	NA	FALSE	protein_coding	1715	148	1.53795	protein_coding	370.25	279.642	284.157	212.472	124.877	139.614	143.542	122.108	126.623	134.24	yes	mRNA	9	40	15	48	ENSMUSG00000026088	protein_coding	61.1873	0.138441	58.4365	0.1432
	XLOC_001663	1	37905920	37916493	-	protein_coding	NA	FALSE	none	2566	135	NA	protein_coding	0	0	0.88799	0	0	0	0	0	0	0	no	NA	NA	NA	NA	NA	ENSMUSG00000061584	protein_coding	NA	NA	NA	NA
	XLOC_001664	1	37946735	37957759	-	protein_coding	NA	FALSE	none	803	0	NA	protein_coding	0	0	0	0	0	0	0	0	0	0	no	NA	NA	NA	NA	NA	ENSMUSG00000026085	protein_coding	NA	NA	NA	NA
	XLOC_001665	1	37983866	37997346	-	protein_coding	NA	FALSE	protein_coding	4950	993	2.34219	protein_coding	1064.01	724.052	1082.46	1070.61	637.911	787.972	751.266	695.914	777.827	838.273	yes	mRNA	10	79	16	237	ENSMUSG00000058407	protein_coding	153.265	-0.208013	192.019	-0.287706
	XLOC_001666	1	38052786	38129662	-	protein_coding	NA	FALSE	protein_coding	4261	0	0.355252	protein_coding	913.712	1105.8	1175.7	1289.27	1291.43	766.819	905.061	1003.67	1040.59	870.143	yes	mRNA	78	1087	77	356	ENSMUSG00000026082	protein_coding	71.4508	-0.098786	111.929	-0.125487
	XLOC_001667	1	38171734	38174694	-	NA	NA	FALSE	none	2960	188	NA	lncRNA	0	0	0.88799	4.12568	22.894	14.8075	7.45673	19.8549	4.76026	4.82876	no	NA	NA	NA	NA	NA	NA	NA	NA	NA	NA	NA
	XLOC_001668	1	38177062	38664955	-	nonsense_mediated_decay;protein_coding	NA	FALSE	none	7233	451	NA	protein_coding	39.4078	55.6963	491.946	559.03	961.55	491.822	390.546	547.002	449.369	592.006	no	NA	NA	NA	NA	NA	ENSMUSG00000037138	nonsense_mediated_decay,protein_coding	13.1192	0.0214836	20.3325	-0.083023
	XLOC_001669	1	38728756	38730449	-	lncRNA	NA	TRUE	none	417	0	NA	protein_coding	0	0	0	0	0	0	0	0	0	0	no	NA	NA	NA	NA	NA	Necsulea_blastnMacaque.Locus_61967	lncRNA	NA	NA	NA	NA
	XLOC_001670	1	38793668	38836090	-	protein_coding	NA	FALSE	protein_coding	6287	459	NA	protein_coding	10.0811	2.32068	12.4319	6.18852	14.5689	3.17304	57.7897	78.4269	92.3491	139.068	no	mRNA	NA	NA	NA	NA	ENSMUSG00000048814	protein_coding	NA	NA	NA	NA
	XLOC_001671	1	38863876	38898160	-	protein_coding	NA	FALSE	protein_coding	3203	58	NA	protein_coding	18.3292	15.0844	64.8232	47.4453	42.6662	22.2113	37.2837	41.6953	47.6026	60.8424	yes	mRNA	8	80	3	39	ENSMUSG00000026080	protein_coding	NA	NA	NA	NA
	XLOC_001672	1	38985696	38987647	-	NA	NA	FALSE	none	1951	519	NA	lncRNA	3.66585	1.16034	0.88799	7.21994	9.36574	13.7499	20.506	21.8404	14.2808	17.3835	no	NA	NA	NA	NA	NA	NA	NA	NA	NA	NA	NA
	XLOC_001673	1	39010505	39011332	-	lncRNA	NA	TRUE	none	708	41	NA	lncRNA	0	0	0	0	0	0	0	0	0	0	no	NA	NA	NA	NA	NA	Necsulea_Locus_81731	lncRNA	NA	NA	NA	NA
	XLOC_001674	1	39026046	39027335	-	lncRNA	NA	TRUE	none	287	21	NA	lncRNA	0	0	0	0	0	0	0	0	0	0	no	NA	NA	NA	NA	NA	Necsulea_CUFF.127116	lncRNA	NA	NA	NA	NA
	XLOC_001675	1	39104795	39105690	-	lncRNA	NA	TRUE	none	230	0	NA	lncRNA	0	0	0	0	0	0	0	0	0	0.965752	no	NA	NA	NA	NA	NA	Necsulea_Locus_82492	lncRNA	NA	NA	NA	NA
	XLOC_001676	1	39186895	39186992	-	miRNA	NA	FALSE	none	97	36	NA	lncRNA	0	0	0	0	0	0	0	0	0	0	no	NA	NA	NA	NA	NA	ENSMUSG00000098833	miRNA	NA	NA	NA	NA
	XLOC_001677	1	39276282	39276565	-	processed_pseudogene	NA	FALSE	none	283	0	NA	lncRNA	0	0	0	0	0	0	0	0	0	0	no	NA	NA	NA	NA	NA	ENSMUSG00000092553	processed_pseudogene	NA	NA	NA	NA
	XLOC_001678	1	39371498	39478747	-	protein_coding	NA	FALSE	protein_coding	4436	183	NA	protein_coding	193.373	251.794	85.247	115.519	121.755	83.5568	139.814	120.122	107.582	100.438	yes	mRNA	15	478	19	97	ENSMUSG00000003134	protein_coding	NA	NA	11.5182	-0.102078
	XLOC_001679	1	39547274	39550387	-	snoRNA	NA	FALSE	none	3113	459	0.0638062	lncRNA	29.3268	24.3671	31.0796	23.7227	32.2598	28.5574	41.012	46.659	27.6095	29.9383	no	NA	NA	NA	NA	NA	ENSMUSG00000077704	snoRNA	NA	NA	NA	NA
	XLOC_001680	1	39551066	39577431	-	protein_coding	snoRNA	FALSE	none	2747	236	0.737603	protein_coding	391.329	299.368	618.929	745.716	517.197	496.052	592.81	564.872	489.355	532.13	no	NA	NA	NA	NA	NA	ENSMUSG00000048234	protein_coding	57.0771	-0.0198694	128.893	-0.0194463
	XLOC_001681	1	39573745	39573875	-	snoRNA	protein_coding	FALSE	none	130	0	NA	lncRNA	4.58231	3.48102	13.3198	9.28278	14.5689	10.5768	10.253	11.9129	19.9931	9.65752	no	NA	NA	NA	NA	NA	ENSMUSG00000064936	snoRNA	NA	NA	NA	NA
	XLOC_001682	1	39582968	39591848	-	lncRNA	NA	TRUE	none	3860	3083	NA	lncRNA	0	0	0	0	0	0	0	0	0.952052	0	no	NA	NA	NA	NA	NA	Necsulea_CUFF.127215|Necsulea_Locus_80208	lncRNA	NA	NA	NA	NA
	XLOC_001683	1	39618405	39651182	-	protein_coding	NA	FALSE	none	5799	1032	NA	protein_coding	4.58231	4.64136	0	1.03142	3.12191	8.46145	8.38882	5.95647	15.2328	18.3493	no	NA	NA	NA	NA	NA	ENSMUSG00000050967	protein_coding	NA	NA	NA	NA
	XLOC_001684	1	39665305	39720997	-	protein_coding	NA	FALSE	none	2003	0	NA	protein_coding	4.58231	0	0	0	6.24383	3.17304	4.66046	0.992745	2.85616	1.9315	no	NA	NA	NA	NA	NA	ENSMUSG00000057173	protein_coding	NA	NA	NA	NA
	XLOC_001685	1	39804140	39805332	-	protein_coding	NA	FALSE	none	359	97	NA	lncRNA	0	0	0	0	0	0	0	0	0	0	no	NA	NA	NA	NA	NA	ENSMUSG00000091937	protein_coding	NA	NA	NA	NA
	XLOC_001686	1	39839199	39884812	-	lncRNA	lncRNA	TRUE	none	3851	737	NA	lncRNA	0	0	0	0	0	0	0.932091	0.992745	0	0	no	NA	NA	NA	NA	NA	Necsulea_Locus_82616|Necsulea_Locus_81719|Necsulea_Locus_80816|Necsulea_Locus_80846	lncRNA	NA	NA	NA	NA
	XLOC_001687	1	39850960	39852345	-	lncRNA	lncRNA	TRUE	none	735	227	NA	lncRNA	0	0	0.88799	0	0	0	0	0	0	0	no	NA	NA	NA	NA	NA	Necsulea_Locus_82616|Necsulea_Locus_81719|Necsulea_Locus_80816|Necsulea_Locus_80846	lncRNA	NA	NA	NA	NA
	XLOC_001688	1	39899695	39900625	-	NA	NA	FALSE	none	930	0	NA	lncRNA	0.916462	1.16034	0.88799	0	3.12191	1.05768	0	5.95647	7.61642	5.79451	no	NA	NA	NA	NA	NA	NA	NA	NA	NA	NA	NA
	XLOC_001689	1	40772037	40790687	-	nonsense_mediated_decay;protein_coding	NA	FALSE	none	3333	0	0.427429	protein_coding	1.83292	33.6498	23.9757	26.8169	27.0566	31.7304	55.9255	33.7533	38.0821	36.6986	no	NA	NA	NA	NA	NA	ENSMUSG00000041945	nonsense_mediated_decay,protein_coding	NA	NA	NA	NA
	XLOC_001690	1	40863733	40864219	-	processed_pseudogene	NA	FALSE	none	486	0	NA	protein_coding	0	0	0	0	0	0	0	0	0	0	no	NA	NA	NA	NA	NA	ENSMUSG00000094136	processed_pseudogene	NA	NA	NA	NA
	XLOC_001691	1	40923105	40923204	-	lncRNA	NA	TRUE	none	99	0	NA	lncRNA	0	0	0	0	0	0	0	0	0	0	no	NA	NA	NA	NA	NA	Necsulea_blastnMacaque.Locus_61934	TooShort	NA	NA	NA	NA
	XLOC_001692	1	41055832	41056279	-	lncRNA	NA	TRUE	none	316	0	NA	lncRNA	0	0	0	0	1.04064	0	0	0	0	0	no	NA	NA	NA	NA	NA	Necsulea_Locus_82491	lncRNA	NA	NA	NA	NA
	XLOC_001693	1	41156841	41158159	-	lncRNA	NA	TRUE	none	644	0	NA	protein_coding	0	0	0	0	0	0	0	0	0	0.965752	no	NA	NA	NA	NA	NA	Necsulea_blastnPlatypus.Locus_14805	lncRNA	NA	NA	NA	NA
	XLOC_001694	1	41167542	41176422	-	lncRNA	NA	TRUE	none	343	0	NA	lncRNA	0	0	0	0	0	0	0	0	0	0	no	NA	NA	NA	NA	NA	Necsulea_Locus_82502	lncRNA	NA	NA	NA	NA
	XLOC_001695	1	41496018	41533333	-	lncRNA	NA	TRUE	none	628	238	NA	lncRNA	0	0	0	0	0	0	0	0	0	0	no	NA	NA	NA	NA	NA	Necsulea_Locus_81594	lncRNA	NA	NA	NA	NA
	XLOC_001696	1	41724733	41749284	-	lncRNA	NA	TRUE	none	423	0	NA	lncRNA	0	0	0	0	0	0	0	0	0	0	no	NA	NA	NA	NA	NA	Necsulea_blastnHuman.ENSG00000232597|Necsulea_blastnXenopus.Locus_167764	lncRNA	NA	NA	NA	NA
	XLOC_001697	1	41936222	41936342	-	lncRNA	NA	TRUE	none	120	0	NA	lncRNA	0	0	0	0	0	0	0	0	0	0	no	NA	NA	NA	NA	NA	Necsulea_blastnOrangutan.Locus_138800	TooShort	NA	NA	NA	NA
	XLOC_001698	1	42627394	42628931	-	NA	NA	TRUE	none	1537	115	NA	lncRNA	0	0	0	0	0	0	0	0	0.952052	5.79451	no	NA	NA	NA	NA	NA	NA	NA	NA	NA	NA	NA
	XLOC_001699	1	42648202	42694978	-	NA	NA	FALSE	none	649	278	NA	lncRNA	0	0	0.88799	0	0	0	10.253	3.97098	76.1642	137.137	no	NA	NA	NA	NA	NA	NA	NA	NA	NA	NA	NA
	XLOC_001700	1	42660221	42660648	-	NA	NA	TRUE	none	427	34	NA	lncRNA	0.916462	0	0	0	0	0	2.79627	1.98549	14.2808	15.452	no	NA	NA	NA	NA	NA	NA	NA	NA	NA	NA	NA
	XLOC_001701	1	42691945	42692488	-	NA	NA	FALSE	none	543	0	NA	lncRNA	0	0	0	0	0	0	1.86418	1.98549	16.1849	13.5205	no	NA	NA	NA	NA	NA	NA	NA	NA	NA	NA	NA
	XLOC_001702	1	42707060	42713708	-	lncRNA	NA	TRUE	lincRNA	1073	36	NA	lncRNA	0	0	0	0	0	0	0	2.97823	24.7534	22.2123	no	NA	NA	NA	NA	NA	Guttman_lincRNA_228|Guttman_lincRNA_229|Guttman_lincRNA_230|Ensembl_ENSMUSG00000097063|Guttman_lincRNA_231	Overlap	NA	NA	NA	NA
	XLOC_001703	1	42771817	42772174	-	lncRNA	NA	TRUE	none	311	0	NA	lncRNA	0	0	0	0	0	0	0	0	0	0	no	NA	NA	NA	NA	NA	Necsulea_blastnHuman.ENSG00000224509	lncRNA	NA	NA	NA	NA
	XLOC_001704	1	42866684	42866818	-	snoRNA	NA	FALSE	none	134	0	NA	lncRNA	0	0	0	0	0	0	0	0	0	0	no	NA	NA	NA	NA	NA	ENSMUSG00000077448	snoRNA	NA	NA	NA	NA
	XLOC_001705	1	43046896	43098656	-	protein_coding	NA	FALSE	protein_coding	7580	440	0.335731	protein_coding	150.3	146.203	103.007	91.7964	251.834	198.844	348.602	321.649	321.794	282	no	mRNA	NA	NA	NA	NA	ENSMUSG00000070939	protein_coding	NA	NA	29.5813	0.182262
	XLOC_001706	1	43123073	43163961	-	protein_coding	NA	FALSE	protein_coding	1789	0	0.907576	protein_coding	5.49877	12.7637	48.8394	104.173	129.039	140.672	205.992	165.788	166.609	147.76	yes	mRNA	0	25	1	60	ENSMUSG00000008136	protein_coding	NA	NA	57.0454	0.0940889
	XLOC_001707	1	43220701	43260958	-	lncRNA	NA	TRUE	none	800	112	NA	lncRNA	0.916462	0	0	0	0	0	0	0	0	0	no	NA	NA	NA	NA	NA	Necsulea_Locus_81758	lncRNA	NA	NA	NA	NA
	XLOC_001708	1	43301438	43306181	-	lncRNA	NA	TRUE	none	348	0	NA	lncRNA	0	0	0	0	0	0	0	0	0	0	no	NA	NA	NA	NA	NA	Necsulea_Locus_81516	lncRNA	NA	NA	NA	NA
	XLOC_001709	1	43595247	43595431	-	lncRNA	NA	TRUE	none	184	0	NA	lncRNA	0	0	0	0	0	0	0	0	0	0	no	NA	NA	NA	NA	NA	Necsulea_blastnHuman.XLOC_002247	TooShort	NA	NA	NA	NA
	XLOC_001710	1	43740487	43742341	-	protein_coding	NA	FALSE	protein_coding	1854	0	NA	lncRNA	3.66585	2.32068	0	4.12568	6.24383	4.23072	8.38882	16.8767	5.71231	7.72602	no	NA	NA	NA	NA	NA	ENSMUSG00000026051	protein_coding	NA	NA	NA	NA
	XLOC_001711	1	43743584	43827800	-	nonsense_mediated_decay;protein_coding	NA	FALSE	none	8198	2629	2.0734	protein_coding	269.44	333.017	174.934	188.75	235.184	263.363	259.121	308.744	229.445	207.637	no	NA	NA	NA	NA	NA	ENSMUSG00000057363	nonsense_mediated_decay,protein_coding	NA	NA	20.5211	0.0677248
	XLOC_001712	1	43918776	43918886	-	miRNA	NA	FALSE	none	110	110	NA	lncRNA	0	0	0	0	1.04064	0	0.932091	0	0	0	no	NA	NA	NA	NA	NA	ENSMUSG00000095757	miRNA	NA	NA	NA	NA
	XLOC_001713	1	43932597	43933884	-	NA	NA	FALSE	none	1287	361	NA	lncRNA	4.58231	6.96204	5.32794	14.4399	11.447	8.46145	10.253	14.8912	17.1369	24.1438	no	lncRNA	NA	NA	NA	NA	NA	NA	NA	NA	NA	NA
	XLOC_001714	1	44009407	44020006	-	protein_coding	processed_pseudogene	FALSE	none	1086	0	NA	protein_coding	0	0	0	0	1.04064	0	0	0	0	0.965752	no	NA	NA	NA	NA	NA	ENSMUSG00000047343	protein_coding	NA	NA	NA	NA
	XLOC_001715	1	44018469	44018649	-	processed_pseudogene	protein_coding	FALSE	none	180	0	NA	lncRNA	0	0	0	0	0	0	0	0	0	0	no	NA	NA	NA	NA	NA	ENSMUSG00000090106	processed_pseudogene	NA	NA	NA	NA
	XLOC_001716	1	44055951	44061936	-	protein_coding	NA	FALSE	none	5985	0	0.556949	protein_coding	0	0	0	2.06284	0	1.05768	2.79627	4.96372	1.9041	6.76027	no	NA	NA	NA	NA	NA	ENSMUSG00000091844	protein_coding	NA	NA	NA	NA
	XLOC_001717	1	44086612	44118808	-	nonsense_mediated_decay;protein_coding	NA	FALSE	none	4476	405	1.43351	protein_coding	893.55	819.199	682.864	798.319	541.132	702.3	757.79	877.587	776.875	789.985	no	NA	NA	NA	NA	NA	NA	NA	NA	NA	NA	NA
	XLOC_001718	1	44145590	44147712	-	NA	NA	FALSE	none	2122	412	NA	lncRNA	1.83292	2.32068	6.21593	14.4399	3.12191	6.34609	7.45673	6.94921	16.1849	13.5205	no	lncRNA	NA	NA	NA	NA	NA	NA	NA	NA	NA	NA
	XLOC_001719	1	44204069	44218961	-	protein_coding	NA	FALSE	none	3211	307	NA	protein_coding	0	0	0	0	0	0	0	0	0	0	no	NA	NA	NA	NA	NA	ENSMUSG00000046828	protein_coding	NA	NA	NA	NA
	XLOC_001720	1	45179951	45186855	-	lncRNA	NA	TRUE	none	570	398	NA	lncRNA	0	0	0	0	0	0	0	0	0	0	no	NA	NA	NA	NA	NA	Necsulea_Locus_82329	lncRNA	NA	NA	NA	NA
	XLOC_001721	1	45374320	45503282	-	protein_coding	NA	FALSE	protein_coding	6625	0	NA	protein_coding	9.16462	3.48102	39.0715	170.184	63.4789	67.6916	48.4688	127.071	39.9862	186.39	no	mRNA	NA	NA	NA	NA	ENSMUSG00000026042	protein_coding	NA	NA	NA	NA
	XLOC_001722	1	45685455	45685562	-	snRNA	NA	FALSE	none	107	107	NA	lncRNA	0	0	0	0	0	0	0	0	0	0	no	NA	NA	NA	NA	NA	ENSMUSG00000095121	snRNA	NA	NA	NA	NA
	XLOC_001723	1	45857331	45857787	-	processed_pseudogene	NA	FALSE	none	456	0	2.65859	protein_coding	157.631	138.08	143.854	199.064	92.6168	191.44	132.357	96.2963	79.9724	104.301	no	NA	NA	NA	NA	NA	ENSMUSG00000084817	processed_pseudogene	NA	NA	NA	NA
	XLOC_001724	1	45889524	45890273	-	protein_coding;translated_processed_pseudogene	NA	FALSE	none	749	34	4.49227	lncRNA	0	0	0	0	0	0	0	0	0	0	no	NA	NA	NA	NA	NA	ENSMUSG00000098549	protein_coding,translated_processed_pseudogene	NA	NA	NA	NA
	XLOC_001725	1	45908069	45925594	-	protein_coding	NA	FALSE	protein_coding	3380	30	NA	protein_coding	1.83292	2.32068	179.374	559.03	426.662	509.802	386.818	186.636	238.965	216.329	no	mRNA	NA	NA	NA	NA	ENSMUSG00000025993	protein_coding	12.471	0.333324	69.441	0.477554
	XLOC_001726	1	46011546	46012266	-	processed_pseudogene	NA	FALSE	none	720	2	NA	lncRNA	0	0	0	0	0	0	0	0	0	0	no	NA	NA	NA	NA	NA	ENSMUSG00000090682	processed_pseudogene	NA	NA	NA	NA
	XLOC_001727	1	46020071	46030469	-	protein_coding	NA	FALSE	none	4667	29	NA	protein_coding	0	0	0	0	0	0	0	0	0	0	no	NA	NA	NA	NA	NA	ENSMUSG00000044457	protein_coding	NA	NA	NA	NA
	XLOC_001728	1	46807377	46888126	-	protein_coding	NA	FALSE	protein_coding	6657	196	0.939324	protein_coding	1109.83	1109.28	1781.31	2022.61	1812.79	1942.96	1787.75	1864.38	1645.15	1571.28	yes	mRNA	14	342	65	352	ENSMUSG00000025986	protein_coding	174.961	0.0829293	251.221	0.166116
	XLOC_001729	1	46969759	46969949	-	lncRNA	NA	TRUE	none	190	0	NA	lncRNA	0	0	0	0	0	0	0	0	0	0	no	NA	NA	NA	NA	NA	Necsulea_blastnHuman.ENSG00000223466	TooShort	NA	NA	NA	NA
	XLOC_001730	1	47365643	47366372	-	processed_pseudogene	NA	FALSE	none	729	0	2.06062	protein_coding	0	0	0	0	0	0	0	0	0	0	no	NA	NA	NA	NA	NA	ENSMUSG00000081185	processed_pseudogene	NA	NA	NA	NA
	XLOC_001731	1	47407823	47425372	-	lncRNA	NA	TRUE	none	511	419	0.0610517	lncRNA	0	0	0	0	0	0	0	0	0	0	no	NA	NA	NA	NA	NA	Necsulea_Locus_82147	lncRNA	NA	NA	NA	NA
	XLOC_001732	1	47467020	47467125	-	miRNA	NA	FALSE	none	105	0	NA	lncRNA	0	0	0	0	0	0	0	0	0	0	no	NA	NA	NA	NA	NA	ENSMUSG00000098876	miRNA	NA	NA	NA	NA
	XLOC_001733	1	47749278	47749399	-	miRNA	NA	FALSE	none	121	121	NA	lncRNA	0	0	0	0	0	0	0	0	0	0	no	NA	NA	NA	NA	NA	ENSMUSG00000094968	miRNA	NA	NA	NA	NA
	XLOC_001734	1	47751298	47751568	-	lncRNA	NA	FALSE	none	270	243	NA	lncRNA	0	0	0	0	0	0	0	0	0	0	no	NA	NA	NA	NA	NA	Ensembl_ENSMUSG00000088017	Overlap	NA	NA	NA	NA
	XLOC_001735	1	47917413	47917757	-	lncRNA	NA	TRUE	none	344	0	NA	lncRNA	0	0	0	0	0	0	0	0	0	0	no	NA	NA	NA	NA	NA	Necsulea_blastnHuman.ENSG00000230173	lncRNA	NA	NA	NA	NA
	XLOC_001736	1	48313865	48314851	-	processed_pseudogene	NA	FALSE	none	986	0	NA	lncRNA	0	0	0	0	0	0	0	0	0	0	no	NA	NA	NA	NA	NA	ENSMUSG00000096973	processed_pseudogene	NA	NA	NA	NA
	XLOC_001737	1	48462172	48462293	-	snRNA	NA	FALSE	none	121	114	0.00350565	lncRNA	0	0	0	0	0	0	0	0	0	0	no	NA	NA	NA	NA	NA	ENSMUSG00000064943	snRNA	NA	NA	NA	NA
	XLOC_001738	1	49537686	49557127	-	lncRNA	NA	TRUE	none	804	293	NA	lncRNA	0	0	0	0	0	0	0.932091	0	0	0	no	NA	NA	NA	NA	NA	Necsulea_CUFF.127840	lncRNA	NA	NA	NA	NA
	XLOC_001739	1	50222388	50222522	-	lncRNA	NA	TRUE	none	134	0	NA	lncRNA	0	0	0	0	0	0	0	0	0	0	no	NA	NA	NA	NA	NA	Ensembl_ENSMUSG00000098249|Necsulea_blastnHuman.ENSG00000227418	TooShort	NA	NA	NA	NA
	XLOC_001740	1	51219087	51250009	-	lncRNA	NA	TRUE	none	1972	857	NA	lncRNA	0	0	0	1.03142	1.04064	0	0	0	0	0	no	NA	NA	NA	NA	NA	Necsulea_CUFF.127970	lncRNA	NA	NA	NA	NA
	XLOC_001741	1	51332540	51333931	-	lncRNA	NA	TRUE	none	464	210	NA	lncRNA	0	0	0	0	0	0	0	0	0	0	no	NA	NA	NA	NA	NA	Necsulea_Locus_82338	lncRNA	NA	NA	NA	NA
	XLOC_001742	1	51405179	51405328	-	lncRNA	NA	TRUE	none	149	0	NA	lncRNA	0	0	0	0	0	0	0	0	0	0	no	NA	NA	NA	NA	NA	Necsulea_blastnHuman.Locus_100641	TooShort	NA	NA	NA	NA
	XLOC_001743	1	51456883	51458907	-	lncRNA	NA	TRUE	none	634	293	NA	lncRNA	0	0	0	0	0	0	0	0	0	0	no	NA	NA	NA	NA	NA	Necsulea_Locus_81838	lncRNA	NA	NA	NA	NA
	XLOC_001744	1	51464769	51478406	-	protein_coding	NA	FALSE	protein_coding	7771	763	0.709599	protein_coding	194.29	232.068	569.201	478.579	731.569	620.859	516.379	278.961	351.307	193.15	yes	mRNA	44	1165	455	845	ENSMUSG00000026107	protein_coding	28.5756	0.40295	42.8057	0.167841
	XLOC_001745	1	51509526	51513148	-	lncRNA	NA	TRUE	none	705	117	NA	lncRNA	0	0	0	0	0	0	0	0	0	0	no	NA	NA	NA	NA	NA	Necsulea_Locus_82393	lncRNA	NA	NA	NA	NA
	XLOC_001746	1	51737825	51739421	-	NA	NA	TRUE	lincRNA	1596	753	NA	lncRNA	2.74938	2.32068	2.66397	2.06284	5.20319	11.6345	5.59255	9.92745	5.71231	6.76027	no	lncRNA	NA	NA	NA	NA	NA	NA	NA	NA	NA	NA
	XLOC_001747	1	51740331	51741030	-	NA	NA	TRUE	none	699	38	NA	lncRNA	0.916462	0	0	0	4.16255	3.17304	2.79627	5.95647	0.952052	2.89726	no	NA	NA	NA	NA	NA	NA	NA	NA	NA	NA	NA
	XLOC_001748	1	51741767	51746871	-	NA	NA	FALSE	none	5104	1901	NA	lncRNA	9.16462	10.4431	5.32794	8.25136	19.7721	37.0188	23.3023	35.7388	23.8013	26.0753	no	lncRNA	NA	NA	NA	NA	NA	NA	NA	NA	NA	NA
	XLOC_001749	1	51749764	51916071	-	protein_coding	NA	FALSE	protein_coding	5662	78	1.60707	protein_coding	1541.49	1746.31	1131.3	1460.49	1727.46	2312.09	1156.73	1369.99	1346.2	1729.66	yes	mRNA	14	212	8	96	ENSMUSG00000018417	protein_coding	78.3904	0.113054	180.619	-0.105328
	XLOC_001750	1	51938973	51939095	-	snoRNA	NA	FALSE	none	122	0	NA	lncRNA	0	0	0	0	0	0	0	0	0	0	no	NA	NA	NA	NA	NA	NA	NA	NA	NA	NA	NA
	XLOC_001751	1	51940649	51941261	-	protein_coding	NA	FALSE	none	612	12	1.57265	protein_coding	0	0	0.88799	0	0	0	0	0	0	0	no	NA	NA	NA	NA	NA	ENSMUSG00000072324	protein_coding	NA	NA	NA	NA
	XLOC_001752	1	52090634	52091066	-	protein_coding	NA	FALSE	none	432	8	0.740451	protein_coding	0	0	0	0	0	0	0.932091	0	0	0	no	NA	NA	NA	NA	NA	ENSMUSG00000078291	protein_coding	NA	NA	NA	NA
	XLOC_001753	1	52163447	52233251	-	protein_coding	NA	FALSE	protein_coding	15814	647	0.698249	protein_coding	1862.25	1717.3	2086.78	2055.62	3918	2576.51	2522.24	2777.7	2815.22	2337.12	yes	mRNA	42	249	94	454	ENSMUSG00000026103	protein_coding	135.254	0.149571	665.123	-0.0809963
	XLOC_001754	1	52423205	52426790	-	NA	NA	TRUE	lincRNA	3585	916	NA	lncRNA	13.7469	24.3671	11.5439	9.28278	46.8287	10.5768	3.72837	2.97823	3.80821	0	no	lncRNA	NA	NA	NA	NA	NA	NA	NA	NA	NA	NA
	XLOC_001755	1	52444435	52444544	-	snRNA	NA	FALSE	none	109	109	NA	lncRNA	0	0	0	0	0	0	1.86418	0	0	0	no	NA	NA	NA	NA	NA	ENSMUSG00000065192	snRNA	NA	NA	NA	NA
	XLOC_001756	1	52457183	52500679	-	protein_coding	NA	FALSE	protein_coding	4115	280	0.111899	protein_coding	95.312	175.211	184.702	177.404	217.493	377.592	182.69	234.288	126.623	185.424	no	mRNA	NA	NA	NA	NA	ENSMUSG00000002881	protein_coding	12.5575	0.140101	17.8699	-0.0765227
	XLOC_001757	1	52503233	52504229	-	processed_pseudogene	NA	FALSE	none	996	0	1.49483	protein_coding	0	0	0.88799	0	0	0	0	0	0	0	no	NA	NA	NA	NA	NA	ENSMUSG00000097833	processed_pseudogene	NA	NA	NA	NA
	XLOC_001758	1	52656285	52727466	-	protein_coding	NA	FALSE	protein_coding	5782	397	NA	protein_coding	43.9902	73.1014	17.7598	66.0109	87.4136	32.7881	39.1478	55.5937	56.1711	79.1917	no	mRNA	NA	NA	NA	NA	ENSMUSG00000041439	protein_coding	NA	NA	NA	NA
	XLOC_001759	1	52789182	52817688	-	nonsense_mediated_decay;protein_coding	NA	FALSE	none	2288	321	1.70257	protein_coding	14.6634	22.0464	35.5196	37.1311	29.1379	26.442	30.759	25.8114	26.6575	38.6301	no	NA	NA	NA	NA	NA	ENSMUSG00000026102	nonsense_mediated_decay,protein_coding	NA	NA	NA	NA
	XLOC_001760	1	52873136	52873998	-	processed_pseudogene	NA	FALSE	none	862	0	NA	lncRNA	0	0	0	0	0	0	0	0	0	0	no	NA	NA	NA	NA	NA	ENSMUSG00000089802	processed_pseudogene	NA	NA	NA	NA
	XLOC_001761	1	52922213	52963260	-	protein_coding	NA	FALSE	protein_coding	4194	39	NA	lncRNA	1162.99	1015.3	784.983	597.192	550.498	469.61	54.9934	66.5139	36.178	25.1096	yes	mRNA	30	192	171	418	ENSMUSG00000043629	protein_coding	90.9103	0.153121	NA	NA
	XLOC_001762	1	53148741	53150118	-	NA	NA	TRUE	lincRNA	1377	477	NA	lncRNA	0	1.16034	8.8799	5.1571	16.6502	6.34609	0.932091	4.96372	0	3.86301	no	lncRNA	NA	NA	NA	NA	NA	NA	NA	NA	NA	NA
	XLOC_001763	1	53157782	53187791	-	protein_coding	NA	FALSE	protein_coding	1821	0	NA	protein_coding	53.1548	16.2447	67.4872	104.173	43.7068	30.6727	20.506	17.8694	5.71231	4.82876	yes	mRNA	0	16	6	56	ENSMUSG00000060715	protein_coding	13.3898	0.0195695	NA	NA
	XLOC_001764	1	53189186	53297018	-	protein_coding	NA	FALSE	protein_coding	3569	0	0.902475	protein_coding	675.432	637.026	676.648	531.181	485.978	538.36	430.626	430.851	397.006	398.856	no	mRNA	NA	NA	NA	NA	ENSMUSG00000026098	protein_coding	88.2139	0.0831548	61.557	0.219934
	XLOC_001765	1	53344616	53352752	-	nonsense_mediated_decay;protein_coding	NA	FALSE	none	2965	68	0.136257	protein_coding	1373.78	1210.23	1214.77	1035.55	764.869	921.24	1023.44	785.261	1036.79	874.972	no	NA	NA	NA	NA	NA	ENSMUSG00000026095	nonsense_mediated_decay,protein_coding	87.2588	0.138416	96.3574	0.357792
	XLOC_001766	1	53397001	53707206	-	protein_coding	miRNA	FALSE	none	12794	0	NA	protein_coding	24.7445	10.4431	42.6235	57.7595	121.755	31.7304	13.9814	23.8259	11.4246	20.2808	no	NA	NA	NA	NA	NA	ENSMUSG00000096141	protein_coding	NA	NA	NA	NA
	XLOC_001767	1	53443270	53443395	-	miRNA	protein_coding	FALSE	none	125	125	NA	lncRNA	0	0	0	0	1.04064	0	0	0	0	0	no	NA	NA	NA	NA	NA	ENSMUSG00000092657	miRNA	NA	NA	NA	NA
	XLOC_001768	1	53711453	53712494	-	NA	NA	FALSE	none	1041	449	NA	lncRNA	0	0	0.88799	1.03142	8.3251	1.05768	0	0	0	0	no	NA	NA	NA	NA	NA	NA	NA	NA	NA	NA	NA
	XLOC_001769	1	53732937	53734133	-	NA	NA	TRUE	lincRNA	1196	340	NA	lncRNA	2.74938	1.16034	6.21593	5.1571	6.24383	4.23072	0	1.98549	0	0	no	lncRNA	NA	NA	NA	NA	NA	NA	NA	NA	NA	NA
	XLOC_001770	1	53737797	53739153	-	NA	NA	TRUE	lincRNA	1356	264	NA	lncRNA	0.916462	1.16034	11.5439	7.21994	10.4064	2.11536	0	0.992745	0	0	no	lncRNA	NA	NA	NA	NA	NA	NA	NA	NA	NA	NA
	XLOC_001771	1	53740368	53745081	-	NA	NA	TRUE	lincRNA	4713	762	NA	lncRNA	5.49877	8.12237	28.4157	36.0997	45.7881	17.9806	0.932091	6.94921	0.952052	1.9315	no	lncRNA	NA	NA	NA	NA	NA	NA	NA	NA	NA	NA
	XLOC_001772	1	53755467	53785224	-	protein_coding	NA	FALSE	protein_coding	3331	51	0.774649	protein_coding	264.857	345.781	654.448	829.261	730.528	567.975	219.041	151.89	218.02	208.603	yes	mRNA	15	56	17	150	ENSMUSG00000026094	protein_coding	46.6751	0.0132878	67.5308	0.377598
	XLOC_001773	1	53806749	54195099	-	protein_coding	snRNA	FALSE	none	12674	73	NA	protein_coding	26.5774	30.1688	134.086	317.677	303.866	242.209	198.535	274.99	234.205	367.952	no	NA	NA	NA	NA	NA	ENSMUSG00000042807	protein_coding	NA	NA	15.8644	0.0243787
	XLOC_001774	1	53886827	53886941	-	snRNA	protein_coding	FALSE	none	114	114	NA	lncRNA	0	0	0	0	1.04064	0	0	0.992745	0	0.965752	no	NA	NA	NA	NA	NA	ENSMUSG00000087949	snRNA	NA	NA	NA	NA
	XLOC_001775	1	54249101	54249208	-	snRNA	NA	FALSE	none	107	107	0.00800509	lncRNA	0	0	0	0	0	1.05768	0	0	0	0	no	NA	NA	NA	NA	NA	ENSMUSG00000094013	snRNA	NA	NA	NA	NA
	XLOC_001776	1	54393822	54394677	-	NA	NA	FALSE	none	855	122	NA	lncRNA	0.916462	0	0.88799	6.18852	7.28447	3.17304	4.66046	4.96372	0.952052	3.86301	no	NA	NA	NA	NA	NA	NA	NA	NA	NA	NA	NA
	XLOC_001777	1	54395483	54439045	-	protein_coding	NA	FALSE	protein_coding	5176	388	1.17621	protein_coding	1440.68	1267.09	1506.92	1364.57	882.461	1290.37	987.085	862.695	937.772	1007.28	yes	mRNA	17	273	24	118	ENSMUSG00000041303	protein_coding	86.6015	0.264617	62.7681	-0.210873
	XLOC_001778	1	54472999	54557684	-	protein_coding	NA	FALSE	protein_coding	10579	566	1.59461	protein_coding	1250.97	1304.22	873.782	1027.29	1524.53	1385.56	1160.45	1144.63	1002.51	956.095	yes	mRNA	19	281	12	99	ENSMUSG00000073678	protein_coding	61.2556	0.116706	107.713	0.331016
	XLOC_001779	1	54595302	54606228	-	lncRNA	NA	TRUE	none	216	216	NA	lncRNA	0	0	0	0	0	0	0	0	0	0	no	NA	NA	NA	NA	NA	Necsulea_CUFF.128589|Necsulea_Locus_80565	lncRNA	NA	NA	NA	NA
	XLOC_001780	1	54627866	54628390	-	lncRNA	NA	TRUE	none	326	0	NA	lncRNA	0	0	0	0	0	0	0.932091	0.992745	0	0	no	NA	NA	NA	NA	NA	Necsulea_Locus_81901	lncRNA	NA	NA	NA	NA
	XLOC_001781	1	54645339	54926527	-	protein_coding	NA	FALSE	protein_coding	7686	293	0.454337	protein_coding	25.6609	97.4685	31.0796	22.6912	42.6662	45.4803	175.233	294.845	139.952	219.226	no	mRNA	NA	NA	NA	NA	ENSMUSG00000052331	protein_coding	NA	NA	12.8155	-0.103719
	XLOC_001782	1	54985168	55027496	-	protein_coding	NA	FALSE	protein_coding	6266	150	1.11892	protein_coding	8493.77	8706.02	7732.61	7153.93	6777.68	7953.76	6083.76	5908.82	6314.96	7142.7	yes	mRNA	96	1078	20	217	ENSMUSG00000025982	protein_coding	724.582	-0.115244	1198.6	0.102857
	XLOC_001783	1	55073050	55073889	-	NA	NA	FALSE	none	839	322	NA	lncRNA	0.916462	1.16034	0	0	8.3251	2.11536	2.79627	4.96372	1.9041	2.89726	no	NA	NA	NA	NA	NA	NA	NA	NA	NA	NA	NA
	XLOC_001784	1	55077834	55088243	-	protein_coding	NA	FALSE	protein_coding	2642	90	2.71412	protein_coding	18468.5	11890	19980.7	17054.5	7326.09	9656.63	7797.88	7415.8	5674.23	6033.06	no	mRNA	NA	NA	NA	NA	ENSMUSG00000025980	protein_coding	966.281	-0.0259242	440.345	-0.0828029
	XLOC_001785	1	55129491	55131027	-	NA	NA	FALSE	none	1536	553	NA	lncRNA	11.914	6.96204	1.77598	7.21994	9.36574	3.17304	6.52464	8.9347	19.041	13.5205	no	lncRNA	NA	NA	NA	NA	NA	NA	NA	NA	NA	NA
	XLOC_001786	1	55160739	55161053	-	processed_pseudogene	NA	FALSE	none	314	0	4.1835	lncRNA	0	0	0	0	0	0	0	0	0	0	no	NA	NA	NA	NA	NA	ENSMUSG00000061863	processed_pseudogene	NA	NA	NA	NA
	XLOC_001787	1	55170158	55226782	-	nonsense_mediated_decay;protein_coding	NA	FALSE	none	4412	243	0.128108	protein_coding	23.828	17.4051	0.88799	5.1571	2.08128	20.0959	15.8456	40.7025	36.178	70.4999	no	NA	NA	NA	NA	NA	ENSMUSG00000025978	nonsense_mediated_decay,protein_coding	NA	NA	12.1537	0.445445
	XLOC_001788	1	55248391	55363613	-	nonsense_mediated_decay;protein_coding	NA	FALSE	none	3924	169	NA	protein_coding	4.58231	11.6034	12.4319	12.377	17.6908	8.46145	4.66046	6.94921	3.80821	0	no	NA	NA	NA	NA	NA	ENSMUSG00000025977	nonsense_mediated_decay,protein_coding	NA	NA	NA	NA
	XLOC_001789	1	55443732	55445064	-	pseudogene	NA	FALSE	none	843	0	1.89927	protein_coding	9.16462	5.8017	20.4238	13.4085	5.20319	5.2884	1.86418	2.97823	0.952052	1.9315	no	NA	NA	NA	NA	NA	ENSMUSG00000073674	pseudogene	NA	NA	NA	NA
	XLOC_001790	1	56612636	56612986	-	lncRNA	NA	TRUE	none	102	0	NA	lncRNA	0	0	0	0	0	0	0	0	0	0	no	NA	NA	NA	NA	NA	Necsulea_blastnHuman.ENSG00000231557	TooShort	NA	NA	NA	NA
	XLOC_001791	1	56636052	56637451	-	protein_coding	NA	FALSE	none	1399	0	NA	protein_coding	0	0	2.66397	1.03142	1.04064	1.05768	0	0	0	0	no	mRNA	NA	NA	NA	NA	ENSMUSG00000045336	protein_coding	NA	NA	NA	NA
	XLOC_001792	1	56793943	56980049	-	protein_coding	NA	FALSE	protein_coding	6860	303	0.5713	protein_coding	37.5749	30.1688	6.21593	25.7855	14.5689	6.34609	42.8762	76.4414	58.0752	34.7671	yes	mRNA	1	120	1	146	ENSMUSG00000038331	protein_coding	NA	NA	19.5983	-0.0570505
	XLOC_001793	1	56999154	56999275	-	miRNA	NA	FALSE	none	121	121	NA	lncRNA	0	0	0	0	0	0	0	0	0	0	no	NA	NA	NA	NA	NA	ENSMUSG00000094128	miRNA	NA	NA	NA	NA
	XLOC_001794	1	57096743	57097024	-	lncRNA	NA	TRUE	none	281	0	NA	lncRNA	0	0	0	0	0	0	0	0	0	0	no	NA	NA	NA	NA	NA	Necsulea_blastnHuman.CUFF.235855	lncRNA	NA	NA	NA	NA
	XLOC_001795	1	57125702	57126828	-	lncRNA	NA	TRUE	none	242	183	NA	lncRNA	0	0	0	0	0	0	0	0	0	0	no	NA	NA	NA	NA	NA	Necsulea_Locus_82348|Necsulea_Locus_80429	lncRNA	NA	NA	NA	NA
	XLOC_001796	1	57332170	57333513	-	lncRNA	NA	TRUE	none	220	112	NA	lncRNA	0	0	0	0	1.04064	0	0	0	0.952052	0	no	NA	NA	NA	NA	NA	Necsulea_Locus_82624	lncRNA	NA	NA	NA	NA
	XLOC_001797	1	57351525	57354179	-	NA	NA	TRUE	lincRNA	2654	643	NA	lncRNA	5.49877	22.0464	11.5439	7.21994	26.016	23.269	17.7097	17.8694	15.2328	7.72602	no	lncRNA	NA	NA	NA	NA	NA	NA	NA	NA	NA	NA
	XLOC_001798	1	57357092	57377521	-	lncRNA	NA	FALSE	none	4235	1223	0.465322	lncRNA	58.6535	61.498	31.9676	29.9112	63.4789	56.0571	49.4008	39.7098	53.3149	34.7671	yes	lncRNA	3	19	83	102	Guttman_lincRNA_235|Guttman_lincRNA_236|Ensembl_ENSMUSG00000097519|Necsulea_ENSMUSG00000084958|Guttman_lincRNA_237	Overlap	NA	NA	NA	NA
	XLOC_001799	1	57386618	57407101	-	nonsense_mediated_decay;protein_coding	NA	FALSE	none	4294	316	1.13639	protein_coding	307.931	194.937	248.637	255.792	166.502	173.46	145.406	158.839	162.801	162.246	no	NA	NA	NA	NA	NA	ENSMUSG00000048495	nonsense_mediated_decay,protein_coding	38.6979	-0.00285871	44.1244	-0.0507496
	XLOC_001800	1	57422243	57422373	-	snoRNA	NA	FALSE	none	130	0	NA	lncRNA	0	0	0	0	0	0	0	0	0	0	no	NA	NA	NA	NA	NA	ENSMUSG00000077776	snoRNA	NA	NA	NA	NA
	XLOC_001801	1	57537307	57537433	-	lncRNA	NA	TRUE	none	126	0	NA	lncRNA	0	0	0	0	0	0	0	0	0	0	no	NA	NA	NA	NA	NA	Necsulea_blastnGorilla.Locus_371504	TooShort	NA	NA	NA	NA
	XLOC_001802	1	57681137	57681241	-	lncRNA	NA	TRUE	none	104	0	NA	lncRNA	0	0	0	0	0	0	0	0.992745	0	0	no	NA	NA	NA	NA	NA	Necsulea_blastnGorilla.Locus_372061	TooShort	NA	NA	NA	NA
	XLOC_001803	1	57955100	58018956	-	nonsense_mediated_decay;protein_coding	NA	FALSE	none	6235	0	0.571359	protein_coding	263.941	226.266	112.775	166.059	148.811	142.787	162.184	146.926	160.897	148.726	no	NA	NA	NA	NA	NA	ENSMUSG00000054770	nonsense_mediated_decay,protein_coding	NA	NA	11.8449	-0.0194032
	XLOC_001804	1	58154980	58155088	-	snoRNA	NA	FALSE	none	108	0	NA	lncRNA	0	0	0	0	0	0	0	0	0	0	no	NA	NA	NA	NA	NA	ENSMUSG00000089275	snoRNA	NA	NA	NA	NA
	XLOC_001805	1	58406614	58424374	-	nonsense_mediated_decay;protein_coding	NA	FALSE	none	9904	2015	0.312582	protein_coding	2379.13	1808.97	1579.73	1344.97	1931.42	1922.86	1237.82	1781.98	1954.56	2094.72	no	NA	NA	NA	NA	NA	ENSMUSG00000026034	nonsense_mediated_decay,protein_coding	376.191	0.273397	622.27	0.00959752
	XLOC_001806	1	58430993	58445486	-	protein_coding	NA	FALSE	protein_coding	1964	53	0.762214	protein_coding	466.479	370.148	531.018	469.296	186.274	266.536	211.585	217.411	212.308	233.712	yes	mRNA	12	109	56	139	ENSMUSG00000026035	protein_coding	43.3926	-0.054004	34.9131	-0.113351
	XLOC_001807	1	58462770	58505109	-	protein_coding	snRNA	FALSE	none	3561	437	0.502674	protein_coding	2645.82	2014.35	2950.79	2351.64	1210.26	1268.16	908.789	1052.31	785.443	884.629	no	NA	NA	NA	NA	NA	ENSMUSG00000026037	protein_coding	181.506	0.16152	112.67	0.0983789
	XLOC_001808	1	58466514	58466621	-	snRNA	protein_coding	FALSE	none	107	107	0.385953	lncRNA	0.916462	0	7.10392	4.12568	5.20319	2.11536	0.932091	4.96372	4.76026	3.86301	no	NA	NA	NA	NA	NA	ENSMUSG00000094245	snRNA	NA	NA	NA	NA
	XLOC_001809	1	58521524	58586323	-	protein_coding	NA	FALSE	protein_coding	10306	975	0.19453	protein_coding	444.484	507.068	448.435	317.677	400.646	357.496	576.965	405.04	532.197	426.863	no	mRNA	NA	NA	NA	NA	ENSMUSG00000038174	protein_coding	38.7936	0.218921	80.5009	0.00401544
	XLOC_001810	1	58658116	58695989	-	protein_coding	NA	FALSE	none	1579	0	NA	protein_coding	0	0	0	0	0	0	0	0	0	0	no	NA	NA	NA	NA	NA	ENSMUSG00000047528	protein_coding	NA	NA	NA	NA
	XLOC_001811	1	58759295	58763373	-	lncRNA	NA	FALSE	none	2241	1905	0.350121	lncRNA	1.83292	0	2.66397	2.06284	0	0	3.72837	0	1.9041	0	no	NA	NA	NA	NA	NA	Guttman_lincRNA_244	Overlap	NA	NA	NA	NA
	XLOC_001812	1	58899492	58973439	-	protein_coding	NA	FALSE	protein_coding	7154	312	0.275847	protein_coding	460.064	416.562	432.451	362.028	351.736	389.227	400.799	378.236	338.931	369.883	yes	mRNA	12	489	13	190	ENSMUSG00000026028	protein_coding	10.1853	-0.0685634	26.5019	0.0240622
	XLOC_001813	1	58997122	59003443	-	protein_coding	NA	FALSE	none	782	0	NA	protein_coding	0	0	0	0	0	0	0	0	0	0	no	NA	NA	NA	NA	NA	NA	NA	NA	NA	NA	NA
	XLOC_001814	1	59050505	59094900	-	protein_coding	NA	FALSE	none	2131	54	NA	protein_coding	0	0	2.66397	0	1.04064	0	0.932091	0.992745	0	0.965752	no	NA	NA	NA	NA	NA	NA	NA	NA	NA	NA	NA
	XLOC_001815	1	59100593	59120096	-	protein_coding	NA	FALSE	protein_coding	1971	60	0.969618	protein_coding	109.059	113.713	228.213	216.598	183.152	208.363	240.48	214.433	217.068	212.466	yes	mRNA	4	84	20	46	ENSMUSG00000038079	protein_coding	39.4435	0.110149	71.6945	0.150425
	XLOC_001816	1	59120935	59237231	-	protein_coding	NA	FALSE	protein_coding	9325	37	1.70444	protein_coding	812.901	956.119	1318.66	1005.63	1048.96	1105.28	753.13	808.094	537.91	714.657	yes	mRNA	26	559	13	151	NA	NA	NA	NA	NA	NA
	XLOC_001817	1	59391388	59392853	-	NA	NA	TRUE	lincRNA	1465	575	0.485281	lncRNA	9.16462	6.96204	4.43995	3.09426	3.12191	1.05768	0	1.98549	0	0	no	lncRNA	NA	NA	NA	NA	NA	NA	NA	NA	NA	NA
	XLOC_001818	1	59408801	59419975	-	lncRNA	NA	TRUE	none	818	121	NA	lncRNA	0	1.16034	0.88799	0	0	0	0	0	0	0	no	NA	NA	NA	NA	NA	Necsulea_Locus_81741	lncRNA	NA	NA	NA	NA
	XLOC_001819	1	59455940	59457782	-	lncRNA	NA	TRUE	none	1205	0	NA	lncRNA	0	0	0	1.03142	0	0	0	0	0	1.9315	no	NA	NA	NA	NA	NA	Necsulea_Locus_82602	lncRNA	NA	NA	NA	NA
	XLOC_001820	1	59479446	59481344	-	NA	NA	FALSE	none	1898	165	0.261204	lncRNA	0	0	4.43995	3.09426	3.12191	5.2884	11.1851	10.9202	23.8013	5.79451	no	lncRNA	NA	NA	NA	NA	NA	NA	NA	NA	NA	NA
	XLOC_001821	1	59481401	59481864	-	NA	NA	FALSE	none	463	0	NA	lncRNA	1.83292	2.32068	5.32794	5.1571	0	0	1.86418	3.97098	6.66437	0	no	NA	NA	NA	NA	NA	NA	NA	NA	NA	NA	NA
	XLOC_001822	1	59488479	59492605	-	lncRNA	NA	FALSE	none	3587	678	NA	lncRNA	0	0	0	0	0	1.05768	0	0	0	0.965752	no	NA	NA	NA	NA	NA	Ensembl_ENSMUSG00000097819	Overlap	NA	NA	NA	NA
	XLOC_001823	1	59627564	59628391	-	protein_coding	NA	FALSE	none	827	0	NA	lncRNA	0	0	0	2.06284	4.16255	1.05768	4.66046	5.95647	0	0.965752	no	NA	NA	NA	NA	NA	ENSMUSG00000047361	protein_coding	NA	NA	NA	NA
	XLOC_001824	1	59632551	59634083	-	protein_coding	NA	FALSE	protein_coding	1532	219	NA	lncRNA	3.66585	5.8017	1.77598	1.03142	5.20319	2.11536	8.38882	9.92745	10.4726	7.72602	no	mRNA	NA	NA	NA	NA	ENSMUSG00000047361	protein_coding	NA	NA	NA	NA
	XLOC_001825	1	59634469	59639033	-	protein_coding	NA	FALSE	protein_coding	4564	969	NA	lncRNA	18.3292	33.6498	9.76789	12.377	56.1945	47.5956	45.6725	58.572	43.7944	43.4589	no	mRNA	NA	NA	NA	NA	ENSMUSG00000047361	protein_coding	NA	NA	NA	NA
	XLOC_001826	1	59639433	59670834	-	protein_coding	NA	FALSE	protein_coding	1215	46	0.660361	protein_coding	3872.97	2763.93	3227.84	2841.56	1350.75	2122.77	1549.14	1543.72	1449.02	1907.36	yes	mRNA	2	20	27	206	ENSMUSG00000026021	protein_coding	549.861	-0.251428	363.115	-0.233442
	XLOC_001827	1	59683602	59684693	-	NA	NA	FALSE	none	1091	539	NA	lncRNA	1.83292	3.48102	0.88799	2.06284	0	3.17304	0.932091	0.992745	9.52052	3.86301	no	NA	NA	NA	NA	NA	NA	NA	NA	NA	NA	NA
	XLOC_001828	1	59763031	59764271	-	lncRNA	NA	FALSE	none	346	35	NA	lncRNA	2.74938	3.48102	0.88799	7.21994	5.20319	1.05768	5.59255	5.95647	9.52052	4.82876	no	NA	NA	NA	NA	NA	Guttman_lincRNA_249	Overlap	NA	NA	NA	NA
	XLOC_001829	1	59989069	60043116	-	protein_coding	NA	FALSE	protein_coding	3687	91	NA	protein_coding	14.6634	10.4431	8.8799	12.377	4.16255	2.11536	22.3702	8.9347	16.1849	17.3835	no	mRNA	NA	NA	NA	NA	ENSMUSG00000026018	protein_coding	NA	NA	NA	NA
	XLOC_001830	1	60067983	60098645	-	protein_coding	NA	FALSE	protein_coding	12537	3126	0.964496	protein_coding	2074.87	1536.29	2211.09	1967.95	1093.71	1204.7	966.579	868.652	801.628	853.725	yes	mRNA	26	245	91	248	ENSMUSG00000026019	protein_coding	323.715	-0.2643	205.797	-0.141646
	XLOC_001831	1	60179216	60180184	-	NA	NA	FALSE	none	968	278	NA	lncRNA	0.916462	1.16034	0	4.12568	0	1.05768	0	3.97098	9.52052	3.86301	no	NA	NA	NA	NA	NA	NA	NA	NA	NA	NA	NA
	XLOC_001832	1	60482352	60567104	-	protein_coding	processed_pseudogene	FALSE	none	3828	526	1.78204	protein_coding	333.592	328.376	483.954	454.856	667.049	493.937	241.412	343.49	198.027	268.479	no	NA	NA	NA	NA	NA	ENSMUSG00000026014	protein_coding	17.1652	0.0568692	15.0979	-0.0562794
	XLOC_001833	1	60522838	60523066	-	processed_pseudogene	protein_coding	FALSE	none	228	0	1.8278	lncRNA	0.916462	1.16034	1.77598	1.03142	1.04064	1.05768	3.72837	0	2.85616	0	no	NA	NA	NA	NA	NA	ENSMUSG00000081562	processed_pseudogene	NA	NA	NA	NA
	XLOC_001834	1	60592250	60592709	-	processed_pseudogene	NA	FALSE	none	459	0	NA	protein_coding	0	0	0	0	1.04064	0	0	0	0	0	no	NA	NA	NA	NA	NA	ENSMUSG00000082160	processed_pseudogene	NA	NA	NA	NA
	XLOC_001835	1	60598157	60599436	-	lncRNA	NA	TRUE	none	263	0	NA	lncRNA	0	0	0	0	0	0	0	0	0	0	no	NA	NA	NA	NA	NA	Necsulea_Locus_80804|Necsulea_Locus_81896	Overlap	NA	NA	NA	NA
	XLOC_001836	1	60613697	60613803	-	miRNA	NA	FALSE	none	106	106	NA	lncRNA	0	0	0	0	0	0	0	0	0	0	no	NA	NA	NA	NA	NA	ENSMUSG00000088973	miRNA	NA	NA	NA	NA
	XLOC_001837	1	60776664	60781834	-	lncRNA	NA	FALSE	none	845	174	NA	lncRNA	0	0	0	0	0	0	0	0	0	0	no	NA	NA	NA	NA	NA	Ensembl_ENSMUSG00000086795|Necsulea_ENSMUSG00000086795	Overlap	NA	NA	NA	NA
	XLOC_001838	1	60851654	60853326	-	NA	NA	TRUE	lincRNA	1672	0	NA	lncRNA	20.1622	3.48102	7.99191	7.21994	1.04064	2.11536	0	0	0	0	no	lncRNA	NA	NA	NA	NA	NA	NA	NA	NA	NA	NA
	XLOC_001839	1	60948229	60948465	-	processed_pseudogene	NA	FALSE	none	236	0	NA	lncRNA	0	1.16034	1.77598	0	0	0	0	0	0	0	no	NA	NA	NA	NA	NA	ENSMUSG00000080800	processed_pseudogene	NA	NA	NA	NA
	XLOC_001840	1	61121377	61124004	-	processed_pseudogene	NA	FALSE	none	1455	1388	NA	lncRNA	0	0	0	0	0	0	0	0	0	0	no	NA	NA	NA	NA	NA	ENSMUSG00000082661	processed_pseudogene	NA	NA	NA	NA
	XLOC_001841	1	61196540	61197242	-	processed_pseudogene	NA	FALSE	none	702	29	NA	lncRNA	0	0	0	0	0	0	0	0	0	0	no	NA	NA	NA	NA	NA	ENSMUSG00000080785	processed_pseudogene	NA	NA	NA	NA
	XLOC_001842	1	61616716	61621149	-	lncRNA	NA	TRUE	none	1131	170	NA	lncRNA	0	0	0	0	0	0	0	0	0	0	no	NA	NA	NA	NA	NA	Necsulea_ENSMUSG00000086009|Ensembl_ENSMUSG00000086009	lncRNA	NA	NA	NA	NA
	XLOC_001843	1	62656694	62657788	-	processed_pseudogene	NA	FALSE	none	240	0	NA	lncRNA	0	0	0	0	0	0	0	0	0	0	no	NA	NA	NA	NA	NA	ENSMUSG00000081950	processed_pseudogene	NA	NA	NA	NA
	XLOC_001844	1	62702523	62703231	-	NA	NA	FALSE	none	708	0	NA	lncRNA	0	0	4.43995	0	0	1.05768	2.79627	2.97823	5.71231	6.76027	no	NA	NA	NA	NA	NA	NA	NA	NA	NA	NA	NA
	XLOC_001845	1	62860077	62860205	-	lncRNA	NA	TRUE	none	128	2	NA	lncRNA	0	0	0	0	0	0	0	0	0	0	no	NA	NA	NA	NA	NA	Necsulea_blastnHuman.Locus_103248	TooShort	NA	NA	NA	NA
	XLOC_001846	1	62958417	63114667	-	nonsense_mediated_decay;protein_coding	NA	FALSE	none	14688	489	0.190321	protein_coding	526.049	1124.37	1061.15	997.383	1295.59	1077.78	1265.78	1482.17	1268.13	1107.72	no	NA	NA	NA	NA	NA	ENSMUSG00000040865	nonsense_mediated_decay,protein_coding	76.4833	0.0587919	117.256	-0.186967
	XLOC_001847	1	63137368	63138130	-	NA	NA	TRUE	none	762	290	NA	lncRNA	0.916462	1.16034	8.8799	4.12568	2.08128	3.17304	2.79627	2.97823	1.9041	2.89726	no	NA	NA	NA	NA	NA	NA	NA	NA	NA	NA	NA
	XLOC_001848	1	63143595	63176822	-	protein_coding	NA	FALSE	none	2923	104	1.9134	protein_coding	3062.81	2652.54	3132.83	2630.12	1150.95	1436.33	1242.48	1169.45	1168.17	1385.85	no	NA	NA	NA	NA	NA	ENSMUSG00000025968	protein_coding	268.443	0.152067	190.162	-0.114803
	XLOC_001849	1	63182690	63214543	-	protein_coding	NA	FALSE	none	1940	0	NA	protein_coding	0	0	0.88799	1.03142	1.04064	2.11536	2.79627	0.992745	0	1.9315	no	NA	NA	NA	NA	NA	ENSMUSG00000046856	protein_coding	NA	NA	NA	NA
	XLOC_001850	1	63236727	63239479	-	lncRNA	NA	TRUE	none	1480	72	NA	lncRNA	0	0	0	0	0	0	0	0	0	0	no	NA	NA	NA	NA	NA	Necsulea_Locus_82358	lncRNA	NA	NA	NA	NA
	XLOC_001851	1	63266847	63273120	-	lncRNA	NA	FALSE	none	882	57	NA	lncRNA	0	0	0	0	0	1.05768	0.932091	1.98549	0.952052	0.965752	no	NA	NA	NA	NA	NA	Guttman_lincRNA_261|Ensembl_ENSMUSG00000087561|Necsulea_ENSMUSG00000087561	Overlap	NA	NA	NA	NA
	XLOC_001852	1	63273225	63273363	-	miRNA	NA	FALSE	none	138	78	NA	lncRNA	0	0	0	0	0	0	0.932091	2.97823	0.952052	0	no	NA	NA	NA	NA	NA	ENSMUSG00000092705	miRNA	NA	NA	NA	NA
	XLOC_001853	1	63300279	63300383	-	snRNA	NA	FALSE	none	104	104	NA	lncRNA	0	0	0	0	0	0	0	0	0	0	no	NA	NA	NA	NA	NA	ENSMUSG00000094214	snRNA	NA	NA	NA	NA
	XLOC_001854	1	63357433	63358050	-	processed_pseudogene	NA	FALSE	none	617	0	NA	lncRNA	0	0	0	0	0	0	0	0	0	0	no	NA	NA	NA	NA	NA	ENSMUSG00000083039	processed_pseudogene	NA	NA	NA	NA
	XLOC_001855	1	63364719	63365365	-	processed_pseudogene	NA	FALSE	none	646	0	0.460451	lncRNA	0	0	0	1.03142	0	0	0.932091	0	0	0	no	NA	NA	NA	NA	NA	ENSMUSG00000081643	processed_pseudogene	NA	NA	NA	NA
	XLOC_001856	1	63431634	63436253	-	lncRNA	NA	TRUE	none	497	100	NA	lncRNA	0	0	0	0	0	0	0	0	0	0	no	NA	NA	NA	NA	NA	Necsulea_Locus_82300	lncRNA	NA	NA	NA	NA
	XLOC_001857	1	63575487	63575590	-	snRNA	NA	FALSE	none	103	103	NA	lncRNA	0	0	0	0	0	0	0	0	0	0	no	NA	NA	NA	NA	NA	ENSMUSG00000087823	snRNA	NA	NA	NA	NA
	XLOC_001858	1	63622850	63686927	-	protein_coding	NA	FALSE	none	2427	0	NA	protein_coding	0	0	0	0	0	0	0	0	0	0.965752	no	NA	NA	NA	NA	NA	ENSMUSG00000069085	protein_coding	NA	NA	NA	NA
	XLOC_001859	1	63698818	63730318	-	protein_coding	NA	FALSE	none	1719	0	NA	protein_coding	1.83292	1.16034	3.55196	3.09426	2.08128	2.11536	3.72837	1.98549	0	1.9315	no	mRNA	NA	NA	NA	NA	ENSMUSG00000025963	protein_coding	NA	NA	NA	NA
	XLOC_001860	1	63754906	63769267	-	protein_coding	NA	FALSE	none	1758	606	NA	protein_coding	0.916462	0	2.66397	4.12568	1.04064	1.05768	0	0	0.952052	0	no	mRNA	NA	NA	NA	NA	ENSMUSG00000025961	protein_coding	NA	NA	NA	NA
	XLOC_001861	1	63778061	63779279	-	lncRNA	NA	TRUE	none	230	55	NA	lncRNA	0	0	0	0	0	0	0	0	0	0	no	NA	NA	NA	NA	NA	Necsulea_Locus_81570	lncRNA	NA	NA	NA	NA
	XLOC_001862	1	63844826	63845578	-	processed_pseudogene	NA	FALSE	none	752	0	NA	lncRNA	0	0	0	0	0	0	0	0	0	0	no	NA	NA	NA	NA	NA	ENSMUSG00000080817	processed_pseudogene	NA	NA	NA	NA
	XLOC_001863	1	63858306	63859073	-	lncRNA	NA	TRUE	none	662	0	NA	lncRNA	0	0	0	0	0	0	0	0	0.952052	0	no	NA	NA	NA	NA	NA	Necsulea_CUFF.129415	lncRNA	NA	NA	NA	NA
	XLOC_001864	1	64026690	64122296	-	protein_coding	miRNA	FALSE	none	10515	705	0.282915	protein_coding	40.3243	91.6668	188.254	352.746	733.65	418.842	232.091	326.613	296.088	376.643	no	NA	NA	NA	NA	NA	ENSMUSG00000025959	protein_coding	18.2112	-0.00742101	37.9742	-0.00868613
	XLOC_001865	1	64042437	64042501	-	miRNA	protein_coding	FALSE	none	64	0	NA	lncRNA	0	0	0	0	0	0	0	0	0	0	no	NA	NA	NA	NA	NA	ENSMUSG00000098487	miRNA	NA	NA	NA	NA
	XLOC_001866	1	64289159	64289400	-	lncRNA	NA	TRUE	none	241	0	NA	lncRNA	0	0	0	0	0	0	0	0	0	0	no	NA	NA	NA	NA	NA	Necsulea_blastnOpossum.Locus_121190	lncRNA	NA	NA	NA	NA
	XLOC_001867	1	64526144	64527503	-	NA	NA	TRUE	lincRNA	1359	246	NA	lncRNA	2.74938	2.32068	0	1.03142	2.08128	3.17304	4.66046	6.94921	3.80821	8.69177	no	NA	NA	NA	NA	NA	NA	NA	NA	NA	NA	NA
	XLOC_001868	1	64529648	64530389	-	NA	NA	FALSE	none	741	664	NA	lncRNA	0.916462	2.32068	0.88799	1.03142	8.3251	3.17304	5.59255	8.9347	8.56847	2.89726	no	NA	NA	NA	NA	NA	NA	NA	NA	NA	NA	NA
	XLOC_001869	1	64530515	64531902	-	NA	NA	FALSE	none	1387	136	NA	lncRNA	1.83292	0	1.77598	0	1.04064	2.11536	3.72837	2.97823	7.61642	5.79451	no	NA	NA	NA	NA	NA	NA	NA	NA	NA	NA	NA
	XLOC_001870	1	64606472	64617242	-	protein_coding	NA	FALSE	protein_coding	2747	122	0.668395	protein_coding	128.305	78.9031	105.671	104.173	96.7793	126.922	158.456	121.115	148.52	137.137	yes	mRNA	5	50	45	140	ENSMUSG00000025956	protein_coding	16.8727	0.0612687	37.8657	-0.00462969
	XLOC_001871	1	64679866	64690559	-	protein_coding	NA	FALSE	none	615	0	0.477608	lncRNA	44.9066	41.7722	49.7274	27.8483	29.1379	37.0188	31.6911	17.8694	21.8972	15.452	no	NA	NA	NA	NA	NA	ENSMUSG00000070871	protein_coding	20.9913	-0.208656	23.8224	0.438472
	XLOC_001872	1	64686842	64687778	-	NA	protein_coding	FALSE	none	936	21	NA	lncRNA	6.41523	2.32068	2.66397	4.12568	5.20319	4.23072	4.66046	5.95647	0.952052	0	no	NA	NA	NA	NA	NA	NA	NA	NA	NA	NA	NA
	XLOC_001873	1	64689136	64690430	-	NA	protein_coding	FALSE	none	1294	189	NA	lncRNA	7.33169	3.48102	4.43995	4.12568	21.8534	23.269	13.0493	10.9202	16.1849	10.6233	no	NA	NA	NA	NA	NA	NA	NA	NA	NA	NA	NA
	XLOC_001874	1	64730559	64737750	-	protein_coding	NA	FALSE	protein_coding	6912	138	0.568172	protein_coding	1301.38	1652.32	1563.75	773.565	709.715	1179.31	174.301	178.694	164.705	109.13	yes	mRNA	119	2008	123	446	ENSMUSG00000045005	protein_coding	35.2045	0.0127674	NA	NA
	XLOC_001875	1	64785982	64956824	-	nonsense_mediated_decay;protein_coding	NA	FALSE	none	9305	455	0.640845	protein_coding	329.926	373.629	237.981	238.258	385.036	337.4	228.362	241.237	252.294	239.507	no	NA	NA	NA	NA	NA	ENSMUSG00000051344	nonsense_mediated_decay,protein_coding	16.0578	0.595524	38.4256	0.00890125
	XLOC_001876	1	64993923	64994631	-	processed_pseudogene	NA	FALSE	none	708	0	1.03419	protein_coding	50.4054	22.0464	10.6559	36.0997	23.9347	23.269	27.0306	4.96372	15.2328	12.5548	no	NA	NA	NA	NA	NA	ENSMUSG00000084416	processed_pseudogene	NA	NA	NA	NA
	XLOC_001877	1	65001306	65001462	-	snRNA	NA	FALSE	none	156	150	NA	lncRNA	0	0	0	0	0	1.05768	0	0	0	0	no	NA	NA	NA	NA	NA	ENSMUSG00000077471	snRNA	NA	NA	NA	NA
	XLOC_001878	1	65012688	65032759	-	nonsense_mediated_decay;protein_coding	NA	FALSE	none	1761	84	1.65492	protein_coding	0	0	0	2.06284	0	0	0.932091	0.992745	0	0	no	NA	NA	NA	NA	NA	ENSMUSG00000025955	nonsense_mediated_decay,protein_coding	NA	NA	NA	NA
	XLOC_001879	1	65048553	65051149	-	protein_coding	NA	FALSE	none	723	0	NA	protein_coding	0.916462	6.96204	1.77598	2.06284	1.04064	0	0.932091	0.992745	13.3287	4.82876	no	NA	NA	NA	NA	NA	ENSMUSG00000070870	protein_coding	NA	NA	NA	NA
	XLOC_001880	1	65061871	65063452	-	protein_coding	NA	FALSE	none	700	0	NA	protein_coding	2.74938	3.48102	0.88799	2.06284	0	0	0	1.98549	3.80821	0.965752	no	NA	NA	NA	NA	NA	ENSMUSG00000067299	protein_coding	NA	NA	NA	NA
	XLOC_001881	1	65071524	65073689	-	protein_coding	NA	FALSE	none	786	0	NA	protein_coding	0	0	4.43995	2.06284	0	0	1.86418	4.96372	0	0.965752	no	NA	NA	NA	NA	NA	ENSMUSG00000025952	protein_coding	NA	NA	NA	NA
	XLOC_001882	1	65080227	65082267	-	protein_coding	NA	FALSE	none	604	0	NA	protein_coding	1.83292	0	0	2.06284	1.04064	0	0	0	0	0	no	NA	NA	NA	NA	NA	ENSMUSG00000073658	protein_coding	NA	NA	NA	NA
	XLOC_001883	1	65100388	65123214	-	protein_coding;nonsense_mediated_decay	NA	FALSE	none	3577	163	NA	protein_coding	43.0737	54.5359	85.247	85.6078	16.6502	16.9229	10.253	3.97098	7.61642	1.9315	no	NA	NA	NA	NA	NA	NA	NA	NA	NA	NA	NA
	XLOC_001884	1	65158615	65186479	-	protein_coding	NA	FALSE	protein_coding	2557	0	1.53444	protein_coding	3180.12	2495.89	1396.81	1573.95	881.42	1280.85	1082.16	1059.26	1287.17	1879.35	yes	mRNA	14	61	18	280	ENSMUSG00000025950	protein_coding	240.755	0.378242	220.148	0.295027
	XLOC_001885	1	65550463	65551237	-	processed_pseudogene	NA	FALSE	none	642	0	NA	protein_coding	0	0	0	0	0	0	0	0	0	0	no	NA	NA	NA	NA	NA	ENSMUSG00000082565	processed_pseudogene	NA	NA	NA	NA
	XLOC_001886	1	65756263	65758474	-	lncRNA	NA	TRUE	none	856	649	NA	lncRNA	0	0	0	0	0	0	0	0	0	0	no	NA	NA	NA	NA	NA	Necsulea_Locus_82458	lncRNA	NA	NA	NA	NA
	XLOC_001887	1	66032182	66032925	-	processed_pseudogene	NA	FALSE	none	743	50	NA	lncRNA	0	0	0	0	0	0	0	0	0	0	no	NA	NA	NA	NA	NA	ENSMUSG00000081623	processed_pseudogene	NA	NA	NA	NA
	XLOC_001888	1	66719247	66817562	-	protein_coding	NA	FALSE	protein_coding	4817	36	0.570069	protein_coding	68.7346	60.3376	50.6154	68.0737	149.852	136.441	129.561	166.781	166.609	269.445	yes	mRNA	2	77	37	210	ENSMUSG00000026004	protein_coding	41.8007	0.0078057	53.7005	-0.181377
	XLOC_001889	1	66830833	66863277	-	protein_coding	processed_pseudogene	FALSE	none	2732	0	5.18073	protein_coding	201.622	276.161	212.23	371.311	478.694	585.955	120.24	107.216	146.616	173.835	no	NA	NA	NA	NA	NA	ENSMUSG00000026003	protein_coding	46.3074	-0.12115	79.3418	-0.076348
	XLOC_001890	1	66849107	66849602	-	processed_pseudogene	protein_coding	FALSE	none	495	0	0.366507	protein_coding	7.33169	10.4431	4.43995	5.1571	8.3251	8.46145	2.79627	3.97098	1.9041	1.9315	no	NA	NA	NA	NA	NA	ENSMUSG00000082769	processed_pseudogene	NA	NA	NA	NA
	XLOC_001891	1	66924294	66945384	-	protein_coding	NA	FALSE	protein_coding	1422	69	NA	protein_coding	0	0	2.66397	0	0	8.46145	0	0.992745	1.9041	0.965752	no	NA	NA	NA	NA	NA	ENSMUSG00000061816	protein_coding	NA	NA	NA	NA
	XLOC_001892	1	66948562	66948940	-	processed_pseudogene	NA	FALSE	none	378	0	1.97293	protein_coding	1.83292	0	0.88799	0	0	0	0	0	0	0	no	NA	NA	NA	NA	NA	ENSMUSG00000094191	processed_pseudogene	NA	NA	NA	NA
	XLOC_001893	1	67000516	67038875	-	protein_coding	NA	FALSE	protein_coding	4464	103	1.8748	protein_coding	788.157	776.267	488.394	436.291	267.444	320.477	564.847	408.018	631.211	572.691	yes	mRNA	5	112	12	36	ENSMUSG00000026000	protein_coding	46.5296	0.0893386	137.486	-0.105106
	XLOC_001894	1	67113678	67116544	-	lncRNA	NA	TRUE	none	1048	0	NA	lncRNA	0	0	0	0	0	0	0	0	0	0	no	NA	NA	NA	NA	NA	Necsulea_Locus_82324	lncRNA	NA	NA	NA	NA
	XLOC_001895	1	68031940	69108059	-	protein_coding	processed_pseudogene;snRNA	FALSE	none	12375	92	NA	protein_coding	0	1.16034	1.77598	4.12568	9.36574	13.7499	64.3143	58.572	268.479	193.15	no	NA	NA	NA	NA	NA	ENSMUSG00000062209	protein_coding.neuron.differentiation	NA	NA	12.5493	-0.0835902
	XLOC_001896	1	68293279	68293726	-	processed_pseudogene	protein_coding	FALSE	none	447	0	NA	lncRNA	0	0	0	0	1.04064	0	0.932091	0.992745	0.952052	0.965752	no	NA	NA	NA	NA	NA	ENSMUSG00000083795	processed_pseudogene	NA	NA	NA	NA
	XLOC_001897	1	68384941	68385035	-	snRNA	protein_coding	FALSE	none	94	0	NA	lncRNA	0	0	0	0	0	0	0	0	0	0	no	NA	NA	NA	NA	NA	ENSMUSG00000080539	snRNA	NA	NA	NA	NA
	XLOC_001898	1	69108156	69108559	-	NA	NA	FALSE	none	403	35	NA	lncRNA	0	0	0	2.06284	0	1.05768	8.38882	4.96372	10.4726	17.3835	no	NA	NA	NA	NA	NA	NA	NA	NA	NA	NA	NA
	XLOC_001899	1	69130913	69131299	-	processed_pseudogene	NA	FALSE	none	386	0	0.861476	lncRNA	0	0	0	0	0	0	0	0	0.952052	0	no	NA	NA	NA	NA	NA	ENSMUSG00000084332	processed_pseudogene	NA	NA	NA	NA
	XLOC_001900	1	69531213	69687490	-	protein_coding	NA	FALSE	protein_coding	9877	621	NA	protein_coding	40.3243	64.979	15.0958	51.571	135.283	108.941	252.597	243.223	386.533	340.911	no	mRNA	NA	NA	NA	NA	ENSMUSG00000025997	protein_coding	NA	NA	77.7091	0.222287
	XLOC_001901	1	69708702	69708900	-	lncRNA	NA	TRUE	none	198	65	NA	lncRNA	0	0	0	0	0	0	0	0	0	0	no	NA	NA	NA	NA	NA	Necsulea_blastnHuman.ENSG00000236193|Necsulea_Locus_80493	lncRNA	NA	NA	NA	NA
	XLOC_001902	1	69772773	69772945	-	lncRNA	NA	TRUE	none	137	0	NA	lncRNA	0	0	0	0	0	0	0	0	0	0	no	NA	NA	NA	NA	NA	Necsulea_blastnHuman.XLOC_002477	TooShort	NA	NA	NA	NA
	XLOC_001903	1	69955003	69955129	-	snRNA	NA	FALSE	none	126	1	0.0403609	lncRNA	0	0	0	0	0	0	0	0	0	0	no	NA	NA	NA	NA	NA	ENSMUSG00000080524	snRNA	NA	NA	NA	NA
	XLOC_001904	1	71016160	71016915	-	NA	NA	TRUE	none	755	289	NA	lncRNA	0.916462	0	0	2.06284	0	1.05768	2.79627	6.94921	2.85616	0.965752	no	NA	NA	NA	NA	NA	NA	NA	NA	NA	NA	NA
	XLOC_001905	1	71020218	71021397	-	NA	NA	TRUE	lincRNA	1179	146	NA	lncRNA	7.33169	2.32068	0	1.03142	3.12191	7.40377	7.45673	10.9202	0.952052	0.965752	no	NA	NA	NA	NA	NA	NA	NA	NA	NA	NA	NA
	XLOC_001906	1	71021646	71023473	-	NA	NA	FALSE	none	1827	23	NA	lncRNA	2.74938	8.12237	5.32794	3.09426	8.3251	10.5768	7.45673	10.9202	6.66437	6.76027	no	lncRNA	NA	NA	NA	NA	NA	NA	NA	NA	NA	NA
	XLOC_001907	1	71027264	71103146	-	protein_coding	processed_pseudogene	FALSE	none	7348	500	1.06799	protein_coding	984.28	1351.8	1100.22	896.304	1092.67	811.241	668.31	644.291	630.259	488.671	no	NA	NA	NA	NA	NA	ENSMUSG00000026196	protein_coding	38.1098	-0.132428	37.3741	-0.221582
	XLOC_001908	1	71039651	71040030	-	processed_pseudogene	protein_coding	FALSE	none	379	0	NA	lncRNA	1.83292	5.8017	3.55196	6.18852	21.8534	9.51913	5.59255	16.8767	2.85616	3.86301	no	NA	NA	NA	NA	NA	ENSMUSG00000089965	processed_pseudogene	NA	NA	NA	NA
	XLOC_001909	1	71243089	71414910	-	protein_coding	NA	FALSE	none	8323	0	NA	protein_coding	0	1.16034	2.66397	1.03142	2.08128	1.05768	0.932091	0.992745	0	0.965752	no	mRNA	NA	NA	NA	NA	ENSMUSG00000050296	protein_coding	NA	NA	NA	NA
	XLOC_001910	1	71585479	71653251	-	protein_coding	NA	FALSE	protein_coding	8473	0	2.82053	protein_coding	8380.12	23253.2	8115.34	5794.52	7058.65	8384.24	3867.25	5170.22	3476.9	3038.26	yes	mRNA	251	5115	165	228	ENSMUSG00000026193	protein_coding	468.805	0.0793802	251.268	0.0545731
	XLOC_001911	1	71683418	71683809	-	NA	NA	TRUE	none	391	0	NA	lncRNA	7.33169	5.8017	0.88799	1.03142	1.04064	0	0	0	0	0	no	NA	NA	NA	NA	NA	NA	NA	NA	NA	NA	NA
	XLOC_001912	1	71894842	71896574	-	lncRNA	NA	TRUE	none	767	172	NA	lncRNA	0	0	0	0	0	0	0	0	0	0.965752	no	NA	NA	NA	NA	NA	Necsulea_Locus_81164|Necsulea_Locus_82629	lncRNA	NA	NA	NA	NA
	XLOC_001913	1	72159232	72212307	-	protein_coding	NA	FALSE	protein_coding	2493	97	0.209718	protein_coding	1398.52	1655.8	1700.5	923.121	538.01	314.131	393.343	388.163	244.677	178.664	yes	mRNA	36	197	80	289	ENSMUSG00000039395	protein_coding	366.269	0.334124	115.981	0.21059
	XLOC_001914	1	72258909	72284335	-	nonsense_mediated_decay;protein_coding	NA	FALSE	none	2030	378	2.92113	protein_coding	110.892	129.958	107.447	90.7649	116.551	106.826	142.61	74.4559	104.726	87.8835	no	NA	NA	NA	NA	NA	ENSMUSG00000026189	nonsense_mediated_decay,protein_coding	36.4628	-0.0435789	47.7195	-0.0589852
	XLOC_001915	1	72427111	72536930	-	protein_coding	NA	FALSE	protein_coding	4553	419	0.530818	lncRNA	0	0	0	0	1.04064	0	0	0	20.9452	50.2191	no	NA	NA	NA	NA	NA	ENSMUSG00000039372	protein_coding	NA	NA	NA	NA
	XLOC_001916	1	72642979	72700564	-	protein_coding	NA	FALSE	none	4573	0	NA	protein_coding	0	0	0	0	1.04064	0	0	0	0	0	no	NA	NA	NA	NA	NA	ENSMUSG00000039342	protein_coding	NA	NA	NA	NA
	XLOC_001917	1	72709993	72711158	-	NA	NA	FALSE	none	1165	465	0.121794	lncRNA	4.58231	3.48102	4.43995	4.12568	4.16255	1.05768	1.86418	0	7.61642	2.89726	no	lncRNA	NA	NA	NA	NA	NA	NA	NA	NA	NA	NA
	XLOC_001918	1	72804679	72805964	-	NA	NA	TRUE	lincRNA	1285	143	NA	lncRNA	2.74938	1.16034	3.55196	8.25136	5.20319	16.9229	1.86418	0.992745	5.71231	9.65752	no	lncRNA	NA	NA	NA	NA	NA	NA	NA	NA	NA	NA
[truncated: 50,067 more rows]

## Sheet: Table S1B lincRNAs in Fig 2A
Highly variable lincRNAs analysed in Figure 2A
gene_id (corresponds to gene_id column in Table S1A)
Guttman_lincRNA_3634|Ensembl_ENSMUSG00000092341|Ensembl_ENSMUSG00000092267|Ensembl_ENSMUSG00000098462
[truncated: 114 more rows]

## Sheet: Key
	Table S1A
[truncated: 36 more rows]
