# Supplementary material for: Distinctive features of lincRNA gene expression suggest widespread RNA-independent functions
Source: Life Sci Alliance. 2018 Jul 31;1(4):e201800124. doi: 10.26508/lsa.201800124 (PMC6238598; doi:10.26508/lsa.201800124)
Supplement: Supplementary file 2 [file LSA-2018-00124_TableS2.xlsx]

## Sheet: Table S2
2000 most variable lincRNA and mRNA genes during ES to NPC differentiation (bulk RNA-seq analysis with DESeq2, Figure 1A)
cuffmerge.gene_id	cuffmerge.gene_name	Counts in CB9 mESCs (2i)	Counts in BC8 mESCs (2i)	Counts in BC8 mESCs (serum LIF)	Counts in CB9 mESCs (serum LIF)	Counts in BC8 NPCs (day 3)	Counts in CB9 NPCs (day 3)	Counts in BC8 NPCs (day 6)	Counts in CB9 NPCs (day 6)	Counts in BC8 NPCs (day 8)	Counts in CB9 NPCs (day 8)	biotype (protein_coding or lincRNA)
XLOC_000017	St18	0	0	0.88799	5.1571	0	0	3.72837	12.9057	87.5888	246.267	protein_coding
XLOC_000036	Prex2	69.6511	63.8187	149.182	231.038	269.525	267.593	480.959	686.98	350.355	503.157	protein_coding
XLOC_000062	Kcnb2	0	0	0	1.03142	1.04064	2.11536	31.6911	46.659	37.13	35.7328	protein_coding
XLOC_000066	Rdh10	98.0614	88.1858	83.471	145.43	152.974	216.825	626.365	605.574	500.78	458.732	protein_coding
XLOC_000081	Crispld1	16.4963	8.12237	51.5034	96.9535	82.2104	159.71	12.1172	35.7388	7.61642	48.2876	protein_coding
XLOC_000084	Tfap2b	0	0	0	2.06284	0	0	62.4501	34.7461	118.054	149.692	protein_coding
XLOC_000160	Cfc1	10.9975	2.32068	12.4319	17.5341	7.28447	449.514	2.79627	0	2.85616	3.86301	protein_coding
XLOC_000164	Plekhb2	1360.03	1721.94	168.718	171.216	201.884	310.958	549.002	368.308	495.067	473.219	protein_coding
XLOC_000182	Zap70	65.9852	51.0549	48.8394	16.5027	22.894	11.6345	9.32091	1.98549	3.80821	0	protein_coding
XLOC_000211	Il1r1	1.83292	1.16034	7.10392	11.3456	8.3251	6.34609	105.326	86.3688	95.2052	65.6712	protein_coding
XLOC_000244	Pou3f3	28.4103	19.7258	1.77598	3.09426	3.12191	2.11536	95.0733	81.4051	663.581	785.157	protein_coding
XLOC_000270	Col3a1	0.916462	0	0.88799	9.28278	5.20319	15.8652	198.535	634.364	433.184	2258.89	protein_coding
XLOC_000276	Dnah7b	3.66585	0	13.3198	15.4713	50.9913	40.1919	52.1971	97.289	69.4998	104.301	protein_coding
XLOC_000293	Stat4	77.8992	107.912	163.39	186.687	106.145	79.3261	18.6418	18.8622	5.71231	4.82876	protein_coding
XLOC_000317	Plcl1	1.83292	3.48102	0	0	0	4.23072	13.0493	23.8259	32.3698	64.7054	protein_coding
XLOC_000333	Aox3	65.9852	45.2532	15.0958	14.4399	0	5.2884	0	0	0	0.965752	protein_coding
XLOC_000350	Fzd7	324.427	309.811	1801.73	1724.53	2909.62	2171.42	2422.51	2279.34	2307.77	2045.46	protein_coding
XLOC_000361	NA	0.916462	1.16034	5.32794	8.25136	31.2191	13.7499	33.5553	102.253	29.5136	29.9383	lincRNA
XLOC_000392	Pard3b	11.914	15.0844	3.55196	11.3456	33.3004	44.4226	339.281	451.699	455.081	597.801	protein_coding
XLOC_000418	Adam23	52.2383	60.3376	645.568	376.468	546.335	202.017	123.968	139.977	104.726	130.377	protein_coding
XLOC_000425	Klf7	8.24815	4.64136	7.10392	20.6284	41.6255	47.5956	80.1599	108.209	166.609	151.623	protein_coding
XLOC_000474	Tmem169	0	0	6.21593	6.18852	5.20319	3.17304	17.7097	6.94921	33.3218	80.1574	protein_coding
XLOC_000475	Xrcc5	3851.89	3183.97	3227.84	2263.97	852.283	1098.93	797.87	736.617	539.814	686.65	protein_coding
XLOC_000495	Gm216	309.764	170.57	42.6235	29.9112	10.4064	11.6345	3.72837	0	2.85616	7.72602	protein_coding
XLOC_000506	Wnt6	12.8305	3.48102	21.3117	7.21994	3.12191	5.2884	71.771	43.6808	78.0683	65.6712	protein_coding
XLOC_000520	Asic4	0	0	1.77598	0	7.28447	2.11536	21.4381	48.6445	129.479	236.609	protein_coding
XLOC_000593	2810459M11Rik	0.916462	1.16034	23.9757	24.7541	49.9506	24.3267	107.191	47.6518	56.1711	22.2123	protein_coding
XLOC_000596	B3gnt7	135.636	77.7427	911.077	749.842	559.863	392.4	322.504	212.447	121.863	90.7807	protein_coding
XLOC_000646	Necsulea_Locus_80975	80.6486	46.4136	15.9838	13.4085	3.12191	1.05768	1.86418	1.98549	0	1.9315	lincRNA
XLOC_000663	Ackr3	55.9042	35.9705	25.7517	29.9112	29.1379	47.5956	196.671	332.57	404.622	514.746	protein_coding
XLOC_000674	Rbm44	35.742	133.439	127.87	27.8483	97.82	17.9806	32.6232	6.94921	13.3287	5.79451	protein_coding
XLOC_000716	Farp2	21.9951	42.9325	36.4076	38.1625	59.3164	67.6916	165.912	208.476	134.239	182.527	protein_coding
XLOC_000851	Gpr39	0	0	0.88799	3.09426	3.12191	3.17304	51.265	27.7969	26.6575	15.452	protein_coding
XLOC_000893	Klhdc8a	0	1.16034	0.88799	1.03142	6.24383	0	96.0054	37.7243	20.9452	17.3835	protein_coding
XLOC_000904	Plekha6	72.4005	116.034	96.7909	51.571	86.373	127.979	276.831	467.583	339.883	423	protein_coding
XLOC_000956	Tnni1	105.393	37.1309	7.10392	1.03142	5.20319	3.17304	8.38882	12.9057	17.1369	52.1506	protein_coding
XLOC_001048	Ncf2	95.312	68.46	22.1997	31.974	5.20319	1.05768	10.253	6.94921	6.66437	5.79451	protein_coding
XLOC_001049	Nmnat2	961.368	957.28	408.475	318.709	103.023	141.729	18.6418	10.9202	18.089	56.9794	protein_coding
XLOC_001054	Rgs8	0	1.16034	2.66397	4.12568	7.28447	37.0188	22.3702	33.7533	87.5888	115.89	protein_coding
XLOC_001055	Rgs16	3.66585	5.8017	43.5115	53.6338	83.251	449.514	44.7404	51.6227	144.712	169.972	protein_coding
XLOC_001085	Angptl1	0	0	0	0	0	0	0.932091	6.94921	31.4177	33.8013	protein_coding
XLOC_001168	Gpa33	559.042	424.684	281.493	245.478	81.1698	64.5185	13.9814	9.92745	9.52052	2.89726	protein_coding
XLOC_001169	Ildr2	0	2.32068	49.7274	39.194	17.6908	13.7499	384.022	219.397	561.711	574.623	protein_coding
XLOC_001182	Rxrg	0	0	41.7355	31.974	22.894	40.1919	2.79627	0.992745	0	5.79451	protein_coding
XLOC_001196	Rgs5	0	0	0.88799	0	3.12191	24.3267	0.932091	70.4849	17.1369	54.0821	protein_coding
XLOC_001223	Arhgap30	79.7322	68.46	98.5668	45.3825	10.4064	8.46145	4.66046	5.95647	0.952052	2.89726	protein_coding
XLOC_001249	Ccdc19	80.6486	60.3376	21.3117	7.21994	8.3251	34.9035	1.86418	4.96372	4.76026	2.89726	protein_coding
XLOC_001259	Aim2	1941.07	1614.03	776.991	834.419	270.566	142.787	60.5859	70.4849	32.3698	56.9794	protein_coding
XLOC_001270	Spta1	169.545	49.8946	1795.51	2659	775.275	679.031	10.253	31.7678	5.71231	14.4863	protein_coding
XLOC_001290	Zbtb18	372.083	379.431	245.085	256.824	441.231	408.265	626.365	851.775	1603.26	1843.62	protein_coding
XLOC_001322	Lefty2	4898.49	2620.05	498.162	1090.21	520.319	694.896	32.6232	77.4341	5.71231	54.0821	protein_coding
XLOC_001325	Lefty1	736.835	105.591	591.401	1395.51	315.313	395.573	17.7097	87.3616	0.952052	43.4589	protein_coding
XLOC_001382	D1Pas1	250.194	102.11	539.898	313.552	122.795	129.037	30.759	46.659	15.2328	8.69177	protein_coding
XLOC_001386	Esrrg	0	1.16034	1.77598	3.09426	8.3251	6.34609	12.1172	19.8549	58.0752	103.336	protein_coding
XLOC_001445	Xkr4	0	1.16034	7.10392	56.7281	95.7387	243.267	13.9814	23.8259	78.0683	128.445	protein_coding
XLOC_001448	Sox17	17.4128	16.2447	4.43995	2.06284	29.1379	306.727	323.436	214.433	243.725	112.027	protein_coding
XLOC_001504	Guttman_lincRNA_211	15.5798	26.6878	53.2794	59.8223	165.461	81.4414	0	0	0	0	lincRNA
XLOC_001508	Slco5a1	110.892	126.477	58.6073	86.6393	121.755	131.152	308.522	309.736	504.588	438.452	protein_coding
XLOC_001510	Prdm14	967.783	855.17	192.694	126.865	50.9913	34.9035	25.1665	27.7969	13.3287	5.79451	protein_coding
XLOC_001514	Lactb2	2793.37	2349.69	894.205	644.637	467.246	484.418	465.114	332.57	309.417	225.02	protein_coding
XLOC_001521	Msc	62.3194	33.6498	94.1269	114.488	11.447	27.4997	6.52464	1.98549	1.9041	25.1096	protein_coding
XLOC_001523	Trpa1	15.5798	15.0844	30.1916	71.168	22.894	31.7304	4.66046	1.98549	0.952052	0.965752	protein_coding
XLOC_001621	Bag2	30.2432	48.7342	84.359	121.708	125.917	184.036	368.176	238.259	283.712	249.164	protein_coding
XLOC_001640	Neurl3	0	2.32068	4.43995	3.09426	4.16255	0	5.59255	17.8694	19.041	73.3972	protein_coding
XLOC_001649	Sema4c	15.5798	18.5654	50.6154	116.55	346.532	448.457	483.755	586.712	583.608	579.451	protein_coding
XLOC_001670	Lonrf2	10.0811	2.32068	12.4319	6.18852	14.5689	3.17304	57.7897	78.4269	92.3491	139.068	protein_coding
XLOC_001706	Fhl2	5.49877	12.7637	48.8394	104.173	129.039	140.672	205.992	165.788	166.609	147.76	protein_coding
XLOC_001721	Col5a2	9.16462	3.48102	39.0715	170.184	63.4789	67.6916	48.4688	127.071	39.9862	186.39	protein_coding
XLOC_001725	Slc40a1	1.83292	2.32068	179.374	559.03	426.662	509.802	386.818	186.636	238.965	216.329	protein_coding
XLOC_001761	1700019D03Rik	1162.99	1015.3	784.983	597.192	550.498	469.61	54.9934	66.5139	36.178	25.1096	protein_coding
XLOC_001781	Ankrd44	25.6609	97.4685	31.0796	22.6912	42.6662	45.4803	175.233	294.845	139.952	219.226	protein_coding
XLOC_001874	Fzd5	1301.38	1652.32	1563.75	773.565	709.715	1179.31	174.301	178.694	164.705	109.13	protein_coding
XLOC_001900	Ikzf2	40.3243	64.979	15.0958	51.571	135.283	108.941	252.597	243.223	386.533	340.911	protein_coding
XLOC_001913	Mreg	1398.52	1655.8	1700.5	923.121	538.01	314.131	393.343	388.163	244.677	178.664	protein_coding
XLOC_001919	Igfbp5	5.49877	3.48102	0.88799	14.4399	93.6574	27.4997	531.292	654.219	992.991	1168.56	protein_coding
XLOC_001942	Ihh	0	1.16034	8.8799	2.06284	20.8128	10.5768	124.9	66.5139	127.575	52.1506	protein_coding
XLOC_001950	Tuba4a	2441.45	1229.96	2191.56	1825.61	1020.87	1098.93	330.892	233.295	174.226	139.068	protein_coding
XLOC_001953	Ptprn	2.74938	4.64136	44.3995	50.5396	167.543	150.191	12.1172	22.8331	33.3218	51.1849	protein_coding
XLOC_001958	Obsl1	124.639	171.73	206.902	427.008	694.106	1154.99	1796.14	1663.84	1430.93	1484.36	protein_coding
XLOC_001969	Pax3	0	2.32068	0.88799	1.03142	2.08128	0	269.374	256.128	158.041	346.705	protein_coding
XLOC_001993	Irs1	36.6585	77.7427	47.9514	175.341	402.727	525.667	1094.28	991.752	1072.01	887.526	protein_coding
XLOC_002005	Dner	59.57	32.4895	7.99191	10.3142	15.6096	26.442	4.66046	2.97823	91.397	183.493	protein_coding
XLOC_002061	Gbx2	150.3	47.5739	509.706	100.048	9.36574	5.2884	329.96	341.504	160.897	150.657	protein_coding
XLOC_002063	Iqca	87.0638	102.11	10.6559	1.03142	2.08128	7.40377	3.72837	1.98549	0	0	protein_coding
XLOC_002072	Per2	3.66585	3.48102	16.8718	9.28278	24.9753	84.6145	37.2837	79.4196	52.3629	50.2191	protein_coding
XLOC_002098	Kif1a	10.9975	67.2997	239.757	1210.89	3524.64	3244.97	1054.2	1055.29	1055.83	981.204	protein_coding
XLOC_002114	St8sia4	0.916462	1.16034	22.1997	17.5341	13.5283	31.7304	51.265	50.63	53.3149	170.938	protein_coding
XLOC_002236	Cxcr4	10.9975	17.4051	24.8637	19.597	23.9347	235.863	156.591	144.941	347.499	321.596	protein_coding
XLOC_002277	Cntn2	30.2432	82.3841	28.4157	76.3251	208.128	159.71	61.518	91.3325	706.423	1026.59	protein_coding
XLOC_002278	Nfasc	10.9975	34.8102	90.5749	200.095	484.937	346.919	168.709	146.926	196.123	197.013	protein_coding
XLOC_002305	Ppfia4	343.673	382.912	281.493	180.498	452.678	172.402	102.53	56.5865	91.397	46.3561	protein_coding
XLOC_002321	Shisa4	30.2432	52.2153	47.9514	41.2568	133.202	122.691	195.739	284.918	162.801	235.644	protein_coding
XLOC_002337	Nr5a2	1366.44	1113.93	695.296	200.095	85.3323	76.153	44.7404	37.7243	22.8493	20.2808	protein_coding
XLOC_002371	Rgs2	3.66585	2.32068	15.9838	34.0369	29.1379	37.0188	56.8576	80.4123	66.6437	114.925	protein_coding
XLOC_002390	Pla2g4a	5.49877	9.28271	156.286	215.567	100.942	58.1725	41.012	19.8549	24.7534	34.7671	protein_coding
XLOC_002397	Hmcn1	10.9975	8.12237	31.0796	143.367	367.345	368.073	375.633	618.48	554.094	863.383	protein_coding
XLOC_002426	Lamc2	355.587	525.634	151.846	165.027	125.917	98.3643	41.9441	32.7606	72.356	55.0479	protein_coding
XLOC_002457	Tdrd5	29.3268	39.4515	195.358	176.373	221.656	181.921	71.771	58.572	26.6575	19.315	protein_coding
XLOC_002459	Soat1	229.115	279.642	1228.09	1464.62	3077.17	3287.27	3076.83	2470.94	2331.58	1774.09	protein_coding
XLOC_002472	1600012P17Rik	0	0	0.88799	1.03142	0	3.17304	41.012	66.5139	56.1711	29.9383	protein_coding
XLOC_002512	Prrx1	0	0	0.88799	0	2.08128	14.8075	17.7097	114.166	41.8903	232.746	protein_coding
XLOC_002550	Dusp27	555.376	198.418	259.293	353.777	20.8128	58.1725	13.9814	19.8549	8.56847	7.72602	protein_coding
XLOC_002551	Mael	27.4938	34.8102	232.653	71.168	84.2917	46.538	21.4381	11.9129	2.85616	3.86301	protein_coding
XLOC_002590	Ddr2	9.16462	23.2068	1.77598	2.06284	0	3.17304	5.59255	13.8984	19.9931	129.411	protein_coding
XLOC_002595	Gm7694	5.49877	11.6034	27.5277	31.974	133.202	78.2684	234.887	250.172	277.999	207.637	protein_coding
XLOC_002603	Fcgr2b	74.2334	49.8946	13.3198	4.12568	1.04064	1.05768	0	0.992745	0	0	protein_coding
XLOC_002633	Nhlh1	0.916462	0	0.88799	1.03142	0	1.05768	2.79627	4.96372	31.4177	52.1506	protein_coding
XLOC_002636	Pea15a	64.1523	106.751	202.462	384.72	667.049	802.78	287.084	290.874	392.246	502.191	protein_coding
XLOC_002639	Atp1a2	421.572	566.246	274.389	261.981	653.521	657.878	43.8083	17.8694	19.9931	23.1781	protein_coding
XLOC_002655	Cadm3	6.41523	4.64136	12.4319	30.9426	35.3817	24.3267	17.7097	15.8839	94.2532	155.486	protein_coding
XLOC_002684	Akt3	359.253	479.22	277.941	349.651	814.82	947.682	1255.53	1506.99	2780.95	2637.47	protein_coding
XLOC_002710	Mixl1	0.916462	3.48102	5.32794	7.21994	7.28447	396.63	0	2.97823	0	0.965752	protein_coding
XLOC_002747	Capn2	62.3194	242.511	346.316	458.982	434.987	743.55	900.4	714.776	823.525	803.506	protein_coding
XLOC_002772	C130074G19Rik	588.368	590.613	69.2632	85.6078	48.91	41.2496	95.0733	45.6663	35.2259	35.7328	protein_coding
XLOC_002785	Tgfb2	7.33169	3.48102	1.77598	10.3142	17.6908	22.2113	37.2837	58.572	41.8903	234.678	protein_coding
XLOC_002808	Prox1	4.58231	9.28271	1.77598	5.1571	77.0072	219.998	369.108	517.22	693.094	777.431	protein_coding
XLOC_002814	Vash2	9.16462	25.5275	185.59	316.646	239.347	219.998	328.096	449.713	422.711	465.493	protein_coding
XLOC_002839	Sertad4	17.4128	18.5654	42.6235	109.33	142.567	140.672	98.8017	145.934	124.719	145.829	protein_coding
XLOC_002912	Akap12	15170.2	14211.8	15442.1	14310.9	11887.2	9092.88	3187.75	3101.34	2273.5	1965.31	protein_coding
XLOC_002926	Lrp11	748.749	975.845	473.298	491.987	657.683	548.936	279.627	182.665	86.6368	74.3629	protein_coding
XLOC_002958	Epm2a	40.3243	45.2532	7.10392	3.09426	39.5442	63.4609	140.746	57.5792	97.1093	91.7465	protein_coding
XLOC_002966	Plagl1	351.921	172.891	34.6316	68.0737	49.9506	99.422	490.28	1070.18	1289.08	1692	protein_coding
XLOC_002969	Hivep2	59.57	84.7048	37.2956	104.173	305.948	298.266	260.986	346.468	425.567	366.986	protein_coding
XLOC_003009	Olig3	1.83292	1.16034	0	2.06284	0	1.05768	135.153	68.4994	49.5067	83.0547	protein_coding
XLOC_003037	Sgk1	2908.85	2281.23	5226.71	2031.9	779.438	1490.27	313.183	123.1	223.732	108.164	protein_coding
XLOC_003055	Vnn1	1.83292	0	2.66397	0	0	1.05768	82.024	64.5284	64.7396	60.8424	protein_coding
XLOC_003072	Moxd1	0.916462	4.64136	21.3117	77.3565	125.917	151.248	169.641	103.245	513.156	687.616	protein_coding
XLOC_003087	Samd3	0	0	0	0	0	195.671	0	0	0	0	protein_coding
XLOC_003100	9330159F19Rik	22.9115	25.5275	171.382	184.624	200.843	175.575	82.024	147.919	257.054	512.815	protein_coding
XLOC_003122	Rsph4a	16.4963	3.48102	67.4872	34.0369	10.4064	90.9606	6.52464	12.9057	2.85616	3.86301	protein_coding
XLOC_003125	Tspyl4	80.6486	58.017	88.799	49.5081	50.9913	65.5762	176.165	217.411	307.513	569.794	protein_coding
XLOC_003205	Cd24a	708.425	392.195	1766.21	2825.06	1745.15	3912.36	2838.22	4122.87	3711.1	4565.11	protein_coding
XLOC_003253	Rfx6	0	0	4.43995	43.3196	28.0972	10.5768	42.8762	142.955	81.8765	74.3629	protein_coding
XLOC_003260	Nepn	0	0	0	0	0	0	100.666	438.793	129.479	167.075	protein_coding
XLOC_003279	Gja1	65.9852	30.1688	1964.23	3632.66	3774.39	4263.51	2072.04	2191.98	1533.76	1302.8	protein_coding
XLOC_003290	Fabp7	0	0	0.88799	3.09426	3.12191	54.9994	7.45673	4.96372	38.0821	84.0205	protein_coding
XLOC_003303	P4ha1	517.801	480.38	387.163	333.149	1490.19	1398.25	3064.72	1532.8	3908.18	2497.44	protein_coding
XLOC_003308	Pla2g12b	0.916462	0	2.66397	1.03142	14.5689	5.2884	84.8203	17.8694	40.9383	11.589	protein_coding
XLOC_003316	Spock2	30.2432	46.4136	105.671	161.933	336.126	351.15	193.875	181.672	432.232	625.808	protein_coding
XLOC_003319	4632428N05Rik	2.74938	1.16034	11.5439	16.5027	46.8287	19.0383	234.887	124.093	129.479	50.2191	protein_coding
XLOC_003332	Nodal	846.81	550.001	781.431	698.271	396.483	560.571	81.0919	79.4196	8.56847	30.9041	protein_coding
XLOC_003424	Slc16a9	290.518	175.211	10.6559	26.8169	19.7721	8.46145	22.3702	11.9129	17.1369	32.8356	protein_coding
XLOC_003451	Rab36	0	1.16034	6.21593	8.25136	18.7315	23.269	51.265	75.4486	55.219	58.9109	protein_coding
XLOC_003457	Ggt1	527.882	437.448	108.335	66.0109	65.5602	51.8264	106.258	35.7388	36.178	13.5205	protein_coding
XLOC_003464	Chchd10	4910.4	4661.08	3139.04	1494.53	1108.28	828.164	226.498	161.817	172.321	143.897	protein_coding
XLOC_003500	Dnmt3l	44.9066	29.0085	9543.22	4496.99	1232.12	876.818	207.856	46.659	73.308	20.2808	protein_coding
XLOC_003501	Icosl	13.7469	35.9705	395.155	249.604	199.803	101.537	100.666	49.6372	46.6506	29.9383	protein_coding
XLOC_003566	Apc2	34.8255	29.0085	44.3995	64.9794	112.389	65.5762	97.8696	91.3325	226.588	445.212	protein_coding
XLOC_003568	Plk5	40.3243	46.4136	130.534	90.7649	121.755	66.6339	15.8456	12.9057	11.4246	7.72602	protein_coding
XLOC_003597	Zfr2	5.49877	29.0085	7.99191	6.18852	30.1785	26.442	86.6845	84.3833	145.664	101.404	protein_coding
XLOC_003654	Rfx4	0.916462	2.32068	3.55196	2.06284	2.08128	1.05768	102.53	134.021	213.26	338.979	protein_coding
XLOC_003667	Timp3	24.7445	19.7258	66.5992	93.8592	152.974	161.825	461.385	219.397	563.615	405.616	protein_coding
XLOC_003682	Igf1	0	1.16034	0	2.06284	10.4064	1.05768	23.3023	56.5865	53.3149	130.377	protein_coding
XLOC_003718	Ntn4	0.916462	2.32068	3.55196	9.28278	15.6096	20.0959	51.265	61.5502	162.801	174.801	protein_coding
XLOC_003764	NA	54.0712	131.118	162.502	135.116	476.612	103.653	85.7524	84.3833	33.3218	14.4863	lincRNA
XLOC_003792	Dusp6	32.9926	30.1688	1966.01	2099.97	1322.65	1984.21	1033.69	699.885	781.635	697.273	protein_coding
XLOC_003806	Kitl	16.4963	17.4051	70.1512	64.9794	36.4223	219.998	300.133	297.823	155.185	161.281	protein_coding
XLOC_003845	Lin7a	0	0	0.88799	1.03142	1.04064	1.05768	97.8696	147.919	195.171	354.431	protein_coding
XLOC_003869	Phlda1	0.916462	3.48102	18.6478	18.5656	31.2191	41.2496	148.203	276.976	163.753	119.753	protein_coding
XLOC_003896	Tspan8	4.58231	0	6.21593	6.18852	7.28447	0	180.826	64.5284	84.7327	29.9383	protein_coding
XLOC_003921	Cpm	4.58231	12.7637	57.7193	34.0369	87.4136	211.536	1100.8	798.167	813.053	826.684	protein_coding
XLOC_003954	NA	125.555	75.422	34.6316	16.5027	28.0972	6.34609	5.59255	3.97098	0.952052	0.965752	lincRNA
XLOC_004010	Agap2	0.916462	3.48102	13.3198	13.4085	21.8534	3.17304	27.0306	25.8114	42.8424	84.0205	protein_coding
XLOC_004011	B4galnt1	19.2457	67.2997	31.0796	31.974	89.4949	62.4032	217.177	152.883	152.328	133.274	protein_coding
XLOC_004016	Arhgap9	158.548	84.7048	98.5668	63.948	24.9753	27.4997	16.7776	16.8767	10.4726	15.452	protein_coding
XLOC_004060	Pmel	473.811	171.73	356.972	281.578	47.8694	78.2684	26.0986	18.8622	19.041	17.3835	protein_coding
XLOC_004125	Rgs17	6.41523	8.12237	7.99191	44.351	96.7793	145.96	70.8389	115.158	65.6916	103.336	protein_coding
XLOC_004132	Ulbp1	413.324	443.25	339.212	250.635	195.64	86.7298	39.1478	22.8331	17.1369	10.6233	protein_coding
XLOC_004166	Samd5	0.916462	1.16034	0.88799	2.06284	6.24383	129.037	78.2957	124.093	111.39	112.027	protein_coding
XLOC_004186	Phactr2	391.329	348.102	50.6154	106.236	120.714	136.441	487.484	517.22	634.067	480.945	protein_coding
XLOC_004211	D10Bwg1379e	21.9951	53.3756	150.07	238.258	556.741	388.169	235.819	185.643	162.801	97.541	protein_coding
XLOC_004214	Tnfaip3	5.49877	10.4431	14.2078	48.4767	70.7634	132.21	127.697	116.151	221.828	239.507	protein_coding
XLOC_004225	Myb	59.57	40.6119	125.207	287.766	688.902	324.708	19.5739	59.5647	39.0341	81.1232	protein_coding
XLOC_004267	Enpp3	22.9115	29.0085	783.207	1049.99	1082.26	889.51	126.764	138.984	53.3149	71.4657	protein_coding
XLOC_004268	Arg1	0	0	0.88799	3.09426	1.04064	7.40377	712.118	632.379	552.19	391.13	protein_coding
XLOC_004278	Tmem200a	0	2.32068	8.8799	30.9426	78.0479	160.768	20.506	7.94196	11.4246	28.0068	protein_coding
XLOC_004295	Rspo3	0	0	2.66397	4.12568	27.0566	302.497	13.9814	31.7678	31.4177	47.3219	protein_coding
XLOC_004352	Marcks	720.339	696.204	662.44	1256.27	1622.35	2045.55	2447.67	3735.7	4445.13	5564.67	protein_coding
XLOC_004364	Traf3ip2	9.16462	4.64136	4.43995	0	8.3251	8.46145	48.4688	50.63	51.4108	65.6712	protein_coding
XLOC_004365	Traf3ip2	33.9091	46.4136	12.4319	8.25136	62.4383	41.2496	186.418	261.092	211.356	186.39	protein_coding
XLOC_004418	Aim1	3.66585	6.96204	43.5115	90.7649	61.3976	213.652	52.1971	22.8331	19.9931	30.9041	protein_coding
XLOC_004420	Prdm1	581.037	341.14	362.3	390.908	143.608	264.42	193.875	185.643	48.5547	61.8082	protein_coding
XLOC_004442	Bves	2.74938	4.64136	13.3198	15.4713	35.3817	25.3843	89.4808	127.071	72.356	47.3219	protein_coding
XLOC_004506	Ddit4	927.459	691.562	449.323	531.181	2390.35	4082.65	738.216	413.975	1370	1512.37	protein_coding
XLOC_004511	Cdh23	3.66585	13.9241	9.76789	4.12568	19.7721	27.4997	121.172	99.2745	193.267	114.925	protein_coding
XLOC_004531	Hkdc1	20.1622	13.9241	6.21593	1.03142	62.4383	30.6727	262.85	114.166	157.089	42.4931	protein_coding
XLOC_004534	Srgn	70.5675	32.4895	9.76789	15.4713	207.087	121.633	416.645	85.3761	245.63	55.0479	protein_coding
XLOC_004571	Zfp365	122.806	207.701	408.475	504.364	178.99	138.556	83.8882	70.4849	56.1711	45.3904	protein_coding
XLOC_004588	Bicc1	16.4963	42.9325	21.3117	42.2882	57.2351	300.381	321.572	344.483	189.458	275.239	protein_coding
XLOC_004610	Susd2	137.469	245.992	67.4872	36.0997	34.3411	21.1536	71.771	31.7678	32.3698	13.5205	protein_coding
XLOC_004615	Gstt2	114.558	76.5824	204.238	226.912	244.55	186.152	54.0613	27.7969	19.041	13.5205	protein_coding
XLOC_004628	Col6a1	146.634	167.089	11.5439	10.3142	35.3817	33.8458	42.8762	33.7533	26.6575	68.5684	protein_coding
XLOC_004631	Col18a1	1104.34	881.858	4811.13	5284.99	4324.89	2722.47	8240.62	5976.32	6700.54	4451.15	protein_coding
XLOC_004681	BC005764	2.74938	2.32068	33.7436	33.0054	33.3004	68.7493	304.794	410.996	625.498	783.225	protein_coding
XLOC_004741	Gna15	480.226	297.047	166.942	117.582	63.4789	50.7687	9.32091	1.98549	1.9041	1.9315	protein_coding
XLOC_004763	Aldh1l2	133.803	196.097	35.5196	20.6284	36.4223	7.40377	28.8948	32.7606	96.1573	183.493	protein_coding
XLOC_004768	Nuak1	75.1498	87.0254	52.3914	170.184	154.014	287.689	600.267	526.155	930.155	618.082	protein_coding
XLOC_004770	C330046G13Rik	145.717	59.1773	158.062	100.048	21.8534	26.442	2.79627	2.97823	0.952052	0	lincRNA
XLOC_004796	Ascl1	0	0	0.88799	0	0	1.05768	32.6232	62.5429	139	145.829	protein_coding
XLOC_004878	Guttman_lincRNA_2174	215.368	118.355	33.7436	47.4453	30.1785	14.8075	9.32091	7.94196	2.85616	0.965752	lincRNA
XLOC_004933	Alx1	1.83292	3.48102	5.32794	9.28278	6.24383	16.9229	20.506	41.6953	49.5067	106.233	protein_coding
XLOC_004950	Acss3	4.58231	4.64136	12.4319	16.5027	35.3817	53.9417	97.8696	136.999	107.582	117.822	protein_coding
XLOC_004962	Syt1	0.916462	0	1.77598	10.3142	18.7315	7.40377	4.66046	16.8767	53.3149	89.815	protein_coding
XLOC_004980	Glipr1	0	0	1.77598	0	4.16255	4.23072	156.591	105.231	75.2121	53.1164	protein_coding
XLOC_004998	Thap2	48.5725	32.4895	59.4953	76.3251	147.771	124.806	276.831	263.077	294.184	350.568	protein_coding
XLOC_004999	Lgr5	0.916462	0	1.77598	0	8.3251	204.132	210.653	437.801	228.493	194.116	protein_coding
XLOC_005084	Tbc1d30	1.83292	2.32068	23.0877	11.3456	37.463	31.7304	27.0306	21.8404	86.6368	122.651	protein_coding
XLOC_005126	Gli1	53.1548	35.9705	174.046	107.268	58.2757	33.8458	164.048	317.678	325.602	323.527	protein_coding
XLOC_005131	Nxph4	0	1.16034	0.88799	1.03142	10.4064	7.40377	19.5739	33.7533	36.178	49.2534	protein_coding
XLOC_005147	Slc39a5	0.916462	0	1.77598	2.06284	21.8534	6.34609	96.0054	25.8114	19.041	12.5548	protein_coding
XLOC_005163	Dgka	614.029	530.275	966.133	732.308	240.387	280.285	64.3143	82.3978	72.356	79.1917	protein_coding
XLOC_005167	Gdf11	33.9091	38.2912	39.0715	49.5081	142.567	69.8069	303.862	535.09	621.69	804.472	protein_coding
XLOC_005206	Neurod4	0	0	1.77598	0	1.04064	0	13.0493	39.7098	78.0683	211.5	protein_coding
XLOC_005245	Sec14l4	76.0663	109.072	95.9029	106.236	97.82	163.941	13.0493	4.96372	1.9041	1.9315	protein_coding
XLOC_005253	Gatsl3	599.366	367.828	771.663	536.338	229.981	236.921	64.3143	31.7678	24.7534	6.76027	protein_coding
XLOC_005254	Osm	312.513	105.591	11.5439	11.3456	1.04064	5.2884	0.932091	0	0.952052	0	protein_coding
XLOC_005281	Aebp1	9.16462	11.6034	31.0796	38.1625	48.91	80.3838	96.9375	124.093	115.198	110.096	protein_coding
XLOC_005300	Ramp3	0.916462	3.48102	47.9514	43.3196	32.2598	27.4997	45.6725	42.688	84.7327	77.2602	protein_coding
XLOC_005305	Adcy1	175.961	203.059	245.973	279.515	419.377	229.517	883.623	1069.19	1065.35	845.999	protein_coding
XLOC_005318	Upp1	4683.12	3694.52	5172.54	2319.66	1207.14	2359.69	559.255	386.178	203.739	136.171	protein_coding
XLOC_005333	Ddc	5.49877	3.48102	5.32794	8.25136	3.12191	3.17304	41.012	58.572	63.7875	57.9451	protein_coding
XLOC_005373	Egfr	20.1622	59.1773	44.3995	127.896	85.3323	151.248	200.4	123.1	205.643	469.356	protein_coding
XLOC_005376	Cnrip1	0	0	2.66397	7.21994	33.3004	21.1536	30.759	46.659	46.6506	40.5616	protein_coding
XLOC_005391	Necsulea_blastnHuman.ENSG00000237179|Necsulea_blastnPlatypus.Locus_173337	0	0	1.77598	1.03142	2.08128	0	18.6418	65.5212	51.4108	65.6712	lincRNA
XLOC_005449	Bcl11a	2.74938	2.32068	19.5358	27.8483	99.9013	74.0377	7.45673	8.9347	57.1231	283.931	protein_coding
XLOC_005490	Efemp1	11.914	1.16034	3.55196	16.5027	11.447	32.7881	142.61	65.5212	43.7944	24.1438	protein_coding
XLOC_005528	Nsg2	60.4865	29.0085	24.8637	13.4085	26.016	30.6727	223.702	216.418	587.416	555.308	protein_coding
XLOC_005537	Sh3pxd2b	24.7445	51.0549	84.359	140.273	253.916	451.63	807.191	1073.16	1001.56	1006.31	protein_coding
XLOC_005552	Gabrp	35.742	88.1858	2.66397	1.03142	4.16255	1.05768	2.79627	1.98549	0	0	protein_coding
XLOC_005607	4933415A04Rik	17.4128	19.7258	49.7274	84.5764	139.446	182.979	417.577	612.524	592.177	575.588	protein_coding
XLOC_005682	Flt4	8.24815	17.4051	47.0634	43.3196	212.29	178.748	100.666	140.97	48.5547	138.103	protein_coding
XLOC_005691	Gfpt2	839.479	799.474	1046.05	491.987	375.67	894.798	143.542	150.897	178.034	141.966	protein_coding
XLOC_005719	Grm6	0	0	15.0958	25.7855	58.2757	49.711	0	0	0.952052	3.86301	protein_coding
XLOC_005734	Col23a1	1.83292	5.8017	2.66397	2.06284	35.3817	62.4032	46.6046	75.4486	39.0341	90.7807	protein_coding
XLOC_005792	Gpx3	6.41523	22.0464	14.2078	24.7541	61.3976	50.7687	587.218	225.353	277.999	71.4657	protein_coding
XLOC_005856	Wnt9a	2.74938	12.7637	8.8799	18.5656	46.8287	33.8458	54.0613	44.6735	88.5409	84.9862	protein_coding
XLOC_005875	Rai1	95.312	66.1393	97.6789	218.661	535.929	713.935	794.142	1254.83	886.361	918.431	protein_coding
XLOC_005900	Mfap4	0.916462	2.32068	3.55196	16.5027	20.8128	12.6922	7.45673	53.6082	51.4108	96.5752	protein_coding
XLOC_005929	Pmp22	0	4.64136	4.43995	9.28278	18.7315	25.3843	762.451	288.889	354.163	225.02	protein_coding
XLOC_005936	Hs3st3a1	5.49877	11.6034	5.32794	5.1571	4.16255	9.51913	45.6725	76.4414	105.678	98.5067	protein_coding
XLOC_005944	Pirt	114.558	119.515	77.2551	69.1051	27.0566	30.6727	0.932091	0	0	0.965752	protein_coding
XLOC_005957	Myh13	144.801	87.0254	39.9595	11.3456	2.08128	5.2884	1.86418	4.96372	0.952052	0	protein_coding
XLOC_006001	Sox15	152.133	154.325	118.103	105.205	65.5602	41.2496	28.8948	17.8694	10.4726	3.86301	protein_coding
XLOC_006005	Zbtb4	39.4078	68.46	6.21593	26.8169	58.2757	111.056	158.456	149.904	129.479	155.486	protein_coding
XLOC_006079	Atp2a3	131.054	494.304	95.9029	38.1625	134.242	173.46	42.8762	31.7678	19.041	10.6233	protein_coding
XLOC_006084	Itgae	44.9066	87.0254	32.8556	21.6598	9.36574	10.5768	4.66046	1.98549	1.9041	3.86301	protein_coding
XLOC_006114	E130309D14Rik	18.3292	31.3292	134.086	102.111	161.299	116.345	12.1172	15.8839	5.71231	13.5205	protein_coding
XLOC_006193	Vtn	0	0	0	0	0	5.2884	21.4381	43.6808	53.3149	45.3904	protein_coding
XLOC_006207	Nf1	468.312	938.714	586.073	579.658	1742.03	1368.64	2242.61	2971.29	2987.54	3265.21	protein_coding
XLOC_006220	Necsulea_Locus_13476	157.631	75.422	51.5034	24.7541	8.3251	11.6345	0	0	0.952052	0	lincRNA
XLOC_006228	Rhbdl3	42.1572	55.6963	7.10392	15.4713	37.463	23.269	138.882	165.788	790.203	924.225	protein_coding
XLOC_006232	Tmem98	21.0786	16.2447	57.7193	147.493	97.82	133.268	85.7524	131.042	147.568	304.212	protein_coding
XLOC_006244	Tmem132e	0	0	7.10392	7.21994	11.447	13.7499	495.873	515.235	1054.87	970.581	protein_coding
XLOC_006268	Rasl10b	10.0811	18.5654	6.21593	5.1571	26.016	11.6345	177.097	133.028	88.5409	112.993	protein_coding
XLOC_006288	Hnf1b	2.74938	1.16034	2.66397	2.06284	24.9753	29.6151	86.6845	129.057	79.9724	36.6986	protein_coding
XLOC_006312	Tbx2	8.24815	8.12237	1.77598	2.06284	10.4064	7.40377	22.3702	45.6663	113.294	331.253	protein_coding
XLOC_006336	Gm11492	3.66585	2.32068	2.66397	16.5027	79.0885	33.8458	41.012	25.8114	41.8903	34.7671	protein_coding
XLOC_006339	Rnf43	2.74938	3.48102	4.43995	13.4085	77.0072	113.172	74.5673	108.209	109.486	103.336	protein_coding
XLOC_006361	Trim25	1226.23	2078.17	1110.87	974.692	641.033	527.783	434.355	277.969	269.431	127.479	protein_coding
XLOC_006383	Car10	0	0	0	5.1571	10.4064	2.11536	50.3329	37.7243	9.52052	7.72602	protein_coding
XLOC_006392	B230206L02Rik	95.312	76.5824	39.0715	30.9426	24.9753	8.46145	10.253	4.96372	9.52052	0.965752	lincRNA
XLOC_006404	Col1a1	5.49877	6.96204	9.76789	20.6284	65.5602	77.2107	230.227	100.267	131.383	376.643	protein_coding
XLOC_006408	Samd14	1.83292	1.16034	2.66397	2.06284	20.8128	15.8652	105.326	176.709	158.993	247.233	protein_coding
XLOC_006437	Hoxb8	0	0	0.88799	0	0	0	16.7776	47.6518	306.561	568.828	protein_coding
XLOC_006438	Hoxb7	5.49877	3.48102	1.77598	0	0	0	11.1851	10.9202	70.4519	131.342	protein_coding
XLOC_006440	Hoxb2	1.83292	0	0	0	0	1.05768	773.636	909.354	936.82	1694.9	protein_coding
XLOC_006442	Hoxb1	0	0	0	0	0	1.05768	225.566	349.446	113.294	91.7465	protein_coding
XLOC_006455	Prr15l	131.054	157.806	30.1916	25.7855	33.3004	13.7499	5.59255	7.94196	11.4246	12.5548	protein_coding
XLOC_006499	Erbb2	101.727	160.127	100.343	168.121	278.891	434.707	673.902	557.923	510.3	481.91	protein_coding
XLOC_006522	Igfbp4	18.3292	31.3292	79.0311	127.896	98.8606	130.095	700.001	775.334	1036.79	1839.76	protein_coding
XLOC_006560	Naglu	43.0737	62.6583	29.3037	34.0369	159.218	172.402	431.558	231.31	271.335	210.534	protein_coding
XLOC_006610	Rundc3a	347.339	384.072	46.1755	70.1365	84.2917	77.2107	25.1665	25.8114	118.054	219.226	protein_coding
XLOC_006615	Fzd2	55.9042	48.7342	179.374	378.531	438.109	585.955	1556.59	1235.97	1070.11	1016.94	protein_coding
XLOC_006616	Gm1564	21.0786	119.515	329.444	285.703	234.144	96.249	62.4501	22.8331	32.3698	25.1096	protein_coding
XLOC_006619	Adam11	25.6609	100.95	22.1997	42.2882	79.0885	72.98	113.715	175.716	238.013	225.986	protein_coding
XLOC_006627	Fmnl1	32.9926	112.553	20.4238	22.6912	13.5283	6.34609	4.66046	1.98549	0.952052	2.89726	protein_coding
XLOC_006633	Wnt3	3.66585	2.32068	10.6559	21.6598	16.6502	153.364	21.4381	12.9057	22.8493	39.5958	protein_coding
XLOC_006638	Mapt	864.223	676.478	248.637	148.524	35.3817	25.3843	25.1665	14.8912	84.7327	122.651	protein_coding
XLOC_006652	Mrc2	4.58231	16.2447	101.231	158.839	337.167	360.669	559.255	526.155	507.444	525.369	protein_coding
XLOC_006707	Kcnj2	0.916462	2.32068	7.10392	3.09426	6.24383	9.51913	25.1665	30.7751	36.178	127.479	protein_coding
XLOC_006713	Sox9	0.916462	1.16034	2.66397	0	7.28447	23.269	87.6166	196.564	343.691	386.301	protein_coding
XLOC_006737	Ttyh2	770.744	777.427	166.942	178.436	125.917	94.1336	113.715	84.3833	89.4929	99.4725	protein_coding
XLOC_006741	Gprc5c	129.221	171.73	94.1269	478.579	544.254	759.415	1164.18	962.963	580.752	500.26	protein_coding
XLOC_006811	2900041M22Rik	47.656	25.5275	69.2632	30.9426	9.36574	9.51913	0	0	0.952052	0	lincRNA
XLOC_006877	Slc16a3	134.72	146.203	1626.8	2623.93	3868.05	4566.01	3078.7	1786.94	2204.95	1849.42	protein_coding
XLOC_006881	Tex19.1	1015.44	1115.09	1070.03	499.207	172.746	124.806	162.184	70.4849	78.0683	39.5958	protein_coding
XLOC_006922	Mtfp1	282.27	194.937	121.655	112.425	71.804	67.6916	34.4874	32.7606	22.8493	34.7671	protein_coding
XLOC_006933	Cabp7	71.484	69.6204	112.775	87.6707	59.3164	88.8452	7.45673	7.94196	25.7054	21.2466	protein_coding
XLOC_006935	Nefh	140.219	152.004	342.764	195.97	72.8447	50.7687	12.1172	17.8694	7.61642	11.589	protein_coding
XLOC_006992	Igfbp3	343.673	402.638	555.881	1234.61	1026.07	3056.7	220.906	238.259	268.479	451.006	protein_coding
XLOC_007025	Grb10	537.046	2251.06	3866.31	834.419	3373.75	585.955	11865.5	678.045	12626.1	623.876	protein_coding
XLOC_007072	NA	86.1474	67.2997	101.231	35.0683	28.0972	21.1536	7.45673	0.992745	5.71231	1.9315	lincRNA
XLOC_007211	Ccdc85a	11.914	13.9241	66.5992	150.587	159.218	137.499	27.0306	35.7388	15.2328	9.65752	protein_coding
XLOC_007278	NA	76.9828	44.0929	15.9838	5.1571	1.04064	2.11536	0.932091	0	0	0	lincRNA
XLOC_007290	Tenm2	1.83292	1.16034	0.88799	1.03142	1.04064	1.05768	51.265	15.8839	53.3149	70.4999	protein_coding
XLOC_007359	Irgm1	8.24815	5.8017	62.1593	144.399	87.4136	112.114	27.0306	18.8622	10.4726	16.4178	protein_coding
XLOC_007380	Maml1	92.5626	112.553	100.343	167.09	394.402	482.303	410.12	656.204	547.43	528.267	protein_coding
XLOC_007403	Phf15	190.624	194.937	459.979	471.359	676.415	674.8	93.2091	80.4123	86.6368	69.5342	protein_coding
XLOC_007409	NA	5.49877	9.28271	21.3117	53.6338	300.744	126.922	82.9561	77.4341	57.1231	41.5274	lincRNA
XLOC_007452	Anxa6	2093.2	2436.71	1560.2	1269.68	530.725	575.378	333.689	328.599	205.643	435.554	protein_coding
XLOC_007459	Fat2	235.531	248.313	22.1997	39.194	21.8534	25.3843	8.38882	4.96372	4.76026	3.86301	protein_coding
XLOC_007468	Glra1	0	0	0	2.06284	1.04064	0	12.1172	11.9129	54.267	125.548	protein_coding
XLOC_007520	Wnt3a	1.83292	3.48102	0	0	0	4.23072	92.277	60.5574	42.8424	33.8013	protein_coding
XLOC_007590	Ulk2	116.391	154.325	60.3833	90.7649	246.631	289.805	692.544	713.784	751.169	932.917	protein_coding
XLOC_007603	Fam211a	76.9828	118.355	12.4319	19.597	62.4383	74.0377	171.505	169.759	193.267	197.013	protein_coding
XLOC_007618	Hs3st3b1	135.636	169.41	134.974	81.4822	50.9913	191.44	335.553	436.808	533.149	514.746	protein_coding
XLOC_007639	Shisa6	1.83292	5.8017	20.4238	84.5764	303.866	360.669	56.8576	87.3616	26.6575	13.5205	protein_coding
XLOC_007648	Wdr16	19.2457	8.12237	26.6397	19.597	10.4064	85.6722	2.79627	1.98549	0	0	protein_coding
XLOC_007657	Arhgef15	73.3169	81.2237	150.958	127.896	62.4383	53.9417	13.0493	20.8476	2.85616	25.1096	protein_coding
XLOC_007675	Efnb3	20.1622	32.4895	30.1916	33.0054	53.0725	120.576	186.418	273.998	272.287	319.664	protein_coding
XLOC_007702	Acap1	98.0614	99.7892	59.4953	27.8483	8.3251	11.6345	3.72837	11.9129	7.61642	9.65752	protein_coding
XLOC_007765	Tekt1	105.393	51.0549	36.4076	12.377	6.24383	28.5574	4.66046	7.94196	5.71231	6.76027	protein_coding
XLOC_007821	Hic1	3.66585	16.2447	5.32794	6.18852	3.12191	2.11536	12.1172	21.8404	14.2808	227.918	protein_coding
XLOC_007832	Doc2b	2.74938	3.48102	0.88799	0	2.08128	50.7687	9.32091	17.8694	42.8424	69.5342	protein_coding
XLOC_007835	Fam101b	3.66585	6.96204	34.6316	44.351	47.8694	79.3261	152.863	160.825	166.609	186.39	protein_coding
XLOC_007842	Cpd	369.334	674.157	303.692	472.39	904.314	1303.06	1897.74	1722.41	1999.31	1904.46	protein_coding
XLOC_007847	Ankrd13b	19.2457	11.6034	32.8556	58.7909	57.2351	60.2878	112.783	290.874	201.835	249.164	protein_coding
XLOC_007855	Pipox	630.526	502.427	810.734	292.923	287.216	105.768	21.4381	22.8331	28.5616	18.3493	protein_coding
XLOC_007897	Necsulea_Locus_13476	144.801	110.232	39.0715	20.6284	30.1785	15.8652	0.932091	0.992745	0	0	lincRNA
XLOC_008005	Epx	43.9902	24.3671	64.8232	27.8483	8.3251	10.5768	1.86418	0	0.952052	0	protein_coding
XLOC_008041	Nog	3.66585	3.48102	2.66397	2.06284	2.08128	19.0383	54.0613	52.6155	44.7465	43.4589	protein_coding
XLOC_008076	Abcc3	183.292	87.0254	29.3037	20.6284	22.894	43.3649	4.66046	12.9057	3.80821	4.82876	protein_coding
XLOC_008077	Cacna1g	1.83292	5.8017	19.5358	52.6024	182.112	138.556	120.24	97.289	94.2532	141.966	protein_coding
XLOC_008095	Itga3	71.484	269.199	267.285	732.308	797.129	596.532	2158.72	1136.69	1071.06	532.13	protein_coding
XLOC_008107	Ngfr	405.076	265.718	129.646	55.6967	17.6908	26.442	29.8269	43.6808	68.5478	163.212	protein_coding
XLOC_008114	B4galnt2	63.2358	139.241	9.76789	4.12568	47.8694	16.9229	477.231	140.97	191.363	89.815	protein_coding
XLOC_008120	Atp5g1	3770.32	3353.38	2821.14	2087.59	748.219	987.874	715.846	572.814	583.608	667.335	protein_coding
XLOC_008122	Calcoco2	1128.16	725.212	206.902	303.237	18.7315	32.7881	113.715	176.709	33.3218	52.1506	protein_coding
XLOC_008208	Krt20	0	1.16034	0.88799	0	1.04064	1.05768	46.6046	65.5212	26.6575	31.8698	protein_coding
XLOC_008260	Krt19	11.914	6.96204	42.6235	123.77	232.062	597.59	633.822	436.808	484.595	498.328	protein_coding
XLOC_008265	Krt17	190.624	83.5444	145.63	86.6393	5.20319	3.17304	2.79627	0	1.9041	0	protein_coding
XLOC_008266	Krt42	1076.84	183.334	85.247	114.488	1.04064	3.17304	1.86418	5.95647	0.952052	0	protein_coding
XLOC_008269	Hap1	1490.17	1229.96	388.939	178.436	141.527	120.576	378.429	345.475	401.766	351.534	protein_coding
XLOC_008273	Leprel4	25.6609	82.3841	44.3995	49.5081	83.251	89.9029	243.276	182.665	252.294	250.13	protein_coding
XLOC_008312	Etv4	7.33169	10.4431	1656.1	523.961	162.34	314.131	45.6725	85.3761	67.5957	75.3287	protein_coding
XLOC_008313	Meox1	0	0	8.8799	4.12568	1.04064	1.05768	247.004	347.461	149.472	156.452	protein_coding
XLOC_008318	Mpp2	12.8305	26.6878	35.5196	43.3196	130.08	170.287	110.919	139.977	194.219	238.541	protein_coding
XLOC_008402	Pecam1	1863.17	2324.16	549.666	413.599	426.662	156.537	150.067	150.897	54.267	143.897	protein_coding
XLOC_008418	Cacng4	3.66585	1.16034	1.77598	17.5341	12.4877	44.4226	25.1665	40.7025	77.1162	130.377	protein_coding
XLOC_008478	NA	14.6634	75.422	2.66397	5.1571	54.1132	16.9229	87.6166	147.919	100.918	71.4657	lincRNA
XLOC_008480	NA	6.41523	49.8946	3.55196	2.06284	29.1379	10.5768	77.3636	91.3325	111.39	80.1574	lincRNA
XLOC_008483	Slc39a11	567.29	601.056	63.9352	93.8592	109.267	92.0182	159.388	124.093	122.815	130.377	protein_coding
XLOC_008485	Cpsf4l	645.189	307.49	64.8232	104.173	26.016	13.7499	8.38882	11.9129	0.952052	1.9315	protein_coding
XLOC_008488	Sdk2	28.4103	32.4895	8.8799	12.377	43.7068	11.6345	1568.71	1603.28	1429.03	1082.61	protein_coding
XLOC_008497	Btbd17	0.916462	0	14.2078	49.5081	20.8128	33.8458	25.1665	30.7751	72.356	193.15	protein_coding
XLOC_008538	Trim47	295.101	256.435	55.9433	68.0737	39.5442	19.0383	9.32091	5.95647	15.2328	3.86301	protein_coding
XLOC_008549	Foxj1	3.66585	6.96204	30.1916	27.8483	29.1379	676.916	17.7097	14.8912	29.5136	29.9383	protein_coding
XLOC_008550	Rnf157	117.307	179.853	48.8394	38.1625	363.183	258.074	495.873	504.314	434.136	457.767	protein_coding
XLOC_008555	Cygb	2.74938	1.16034	6.21593	3.09426	4.16255	5.2884	2.79627	26.8041	12.3767	85.952	protein_coding
XLOC_008575	Socs3	1379.27	1536.29	1233.42	646.7	175.868	196.729	173.369	124.093	279.903	188.322	protein_coding
XLOC_008582	Timp2	0	19.7258	21.3117	46.4139	67.6415	114.23	215.313	222.375	247.534	282.965	protein_coding
XLOC_008593	Cbx4	55.9042	96.3082	10.6559	6.18852	14.5689	15.8652	50.3329	43.6808	109.486	152.589	protein_coding
XLOC_008602	Nptx1	66.9017	207.701	57.7193	19.597	35.3817	22.2113	141.678	187.629	312.273	244.335	protein_coding
XLOC_008615	2810410L24Rik	26.5774	26.6878	1.77598	1.03142	22.894	12.6922	61.518	118.137	182.794	130.377	lincRNA
XLOC_008639	Notum	445.4	191.456	216.669	45.3825	16.6502	14.8075	44.7404	29.7823	45.6985	47.3219	protein_coding
XLOC_008714	Apob	5.49877	5.8017	56.8313	68.0737	1786.78	805.953	10042.4	2591.06	1650.86	429.76	protein_coding
XLOC_008731	Osr1	0	0	0	0	0	0	137.017	241.237	166.609	151.623	protein_coding
XLOC_008796	NA	52.2383	158.966	15.0958	14.4399	39.5442	9.51913	10.253	3.97098	2.85616	1.9315	lincRNA
XLOC_008891	NA	13.7469	22.0464	15.9838	38.1625	123.836	59.2301	83.8882	141.963	98.0614	94.6437	lincRNA
XLOC_008955	Myt1l	0	0	4.43995	9.28278	37.463	4.23072	1.86418	7.94196	49.5067	119.753	protein_coding
XLOC_008956	Pxdn	30.2432	160.127	841.814	1270.71	2259.23	2949.87	2652.73	3297.9	2197.34	2225.09	protein_coding
XLOC_009013	Etv1	32.9926	41.7722	551.442	531.181	419.377	467.495	232.091	312.715	343.691	306.144	protein_coding
XLOC_009035	Nrcam	14.6634	16.2447	23.0877	46.4139	236.225	630.378	332.757	360.366	818.765	804.472	protein_coding
XLOC_009053	NA	0	0	0.88799	0	0	0	29.8269	42.688	32.3698	27.0411	lincRNA
XLOC_009076	Akap6	8.24815	8.12237	7.99191	21.6598	19.7721	34.9035	2.79627	2.97823	159.945	313.87	protein_coding
XLOC_009077	Npas3	1.83292	4.64136	2.66397	1.03142	9.36574	21.1536	62.4501	53.6082	198.027	317.733	protein_coding
XLOC_009113	Ttc6	0.916462	2.32068	2.66397	8.25136	4.16255	40.1919	41.9441	131.042	62.8355	64.7054	protein_coding
XLOC_009206	Six6	0	0	1.77598	2.06284	0	1.05768	26.0986	29.7823	53.3149	69.5342	protein_coding
XLOC_009227	Mthfd1	5906.59	6159.08	9095.68	10051.2	6599.73	6948.96	1988.15	1710.5	1378.57	1194.64	protein_coding
XLOC_009231	Gm10451	302.432	181.013	223.773	166.059	111.348	44.4226	61.518	50.63	34.2739	15.452	protein_coding
XLOC_009267	NA	28.4103	93.9875	51.5034	36.0997	342.37	167.114	157.523	243.223	161.849	109.13	lincRNA
XLOC_009372	Vrtn	11.914	8.12237	215.781	405.348	445.393	969.893	23.3023	11.9129	0	0	protein_coding
XLOC_009377	Prox2	31.1597	31.3292	71.0392	83.545	269.525	156.537	254.461	517.22	197.075	273.308	protein_coding
XLOC_009380	Prox2	1.83292	0	3.55196	7.21994	19.7721	8.46145	72.7031	91.3325	28.5616	70.4999	protein_coding
XLOC_009385	Fos	31.1597	45.2532	99.4548	243.415	93.6574	163.941	274.967	266.056	273.239	403.684	protein_coding
XLOC_009391	Jdp2	322.594	237.87	31.9676	20.6284	16.6502	27.4997	105.326	65.5212	129.479	132.308	protein_coding
XLOC_009402	Esrrb	5969.83	7535.24	4726.77	2186.61	789.844	626.147	149.135	173.73	65.6916	58.9109	protein_coding
XLOC_009407	Vash1	67.8182	204.22	79.0311	96.9535	69.7228	71.9223	483.755	596.64	723.56	912.636	protein_coding
XLOC_009470	Flrt2	109.975	128.798	24.8637	36.0997	28.0972	23.269	295.473	454.677	346.547	669.266	protein_coding
XLOC_009514	Fam181a	0.916462	6.96204	3.55196	5.1571	2.08128	0	24.2344	16.8767	100.918	82.089	protein_coding
XLOC_009519	Ppp4r4	27.4938	19.7258	32.8556	61.8852	154.014	401.919	102.53	105.231	121.863	118.788	protein_coding
XLOC_009527	Serpina3i	76.0663	51.0549	5.32794	5.1571	3.12191	1.05768	0	0	0	0	protein_coding
XLOC_009547	D430019H16Rik	23.828	60.3376	31.9676	38.1625	92.6168	112.114	170.573	196.564	335.122	434.589	protein_coding
XLOC_009548	Bdkrb2	150.3	143.882	19.5358	23.7227	9.36574	7.40377	13.0493	26.8041	12.3767	8.69177	protein_coding
XLOC_009552	Ak7	52.2383	23.2068	166.942	54.6652	8.3251	27.4997	8.38882	2.97823	0.952052	3.86301	protein_coding
XLOC_009595	Hhipl1	6.41523	10.4431	7.99191	9.28278	22.894	23.269	43.8083	35.7388	105.678	88.8492	protein_coding
XLOC_009596	Cyp46a1	1.83292	0	0.88799	2.06284	8.3251	3.17304	17.7097	4.96372	54.267	52.1506	protein_coding
XLOC_009606	Dlk1	3.66585	2.32068	21.3117	29.9112	8.3251	20.0959	185.486	315.693	608.361	375.678	protein_coding
XLOC_009661	NA	0	0	0	0	1.04064	0	22.3702	34.7461	192.315	221.157	lincRNA
XLOC_009662	Dio3	217.201	85.8651	7.10392	11.3456	10.4064	7.40377	32.6232	29.7823	51.4108	24.1438	protein_coding
XLOC_009684	Amn	0.916462	11.6034	15.0958	29.9112	143.608	83.5568	198.535	42.688	20.9452	12.5548	protein_coding
XLOC_009756	Sp8	7.33169	12.7637	8.8799	18.5656	20.8128	83.5568	125.832	182.665	327.506	316.767	protein_coding
XLOC_009762	Macc1	0	0	9.76789	27.8483	26.016	7.40377	33.5553	54.601	55.219	58.9109	protein_coding
XLOC_009784	Klhl29	1.83292	4.64136	5.32794	11.3456	23.9347	17.9806	41.012	75.4486	75.2121	56.0136	protein_coding
XLOC_009803	Rhob	216.285	126.477	251.301	740.559	407.93	447.399	1057.92	820.007	935.867	1006.31	protein_coding
XLOC_009824	Kcns3	171.378	113.713	60.3833	37.1311	30.1785	144.902	18.6418	27.7969	15.2328	23.1781	protein_coding
XLOC_009988	Id2	43.0737	35.9705	365.852	595.129	116.551	194.613	836.086	945.093	1094.86	1144.42	protein_coding
XLOC_010006	Sox11	188.791	371.309	1135.74	1303.71	2229.05	2496.13	3665.92	5273.46	7610.71	9686.5	protein_coding
XLOC_010034	Prkar2b	33.9091	34.8102	116.327	184.624	208.128	199.902	549.002	456.663	669.293	719.486	protein_coding
XLOC_010133	Nova1	54.9877	35.9705	36.4076	51.571	82.2104	76.153	133.289	287.896	337.027	604.561	protein_coding
XLOC_010164	Egln3	104.477	64.979	519.474	360.997	1416.31	1186.72	267.51	130.05	258.006	199.911	protein_coding
XLOC_010176	Cfl2	381.248	537.237	374.732	389.877	532.807	470.668	1680.56	1676.75	2042.15	2309.11	protein_coding
XLOC_010196	Slc25a21	0.916462	0	0	0	0	2.11536	66.1785	93.318	88.5409	70.4999	protein_coding
XLOC_010199	Foxa1	0.916462	3.48102	2.66397	1.03142	9.36574	40.1919	71.771	263.077	152.328	117.822	protein_coding
XLOC_010228	Rpl10l	308.848	240.19	436.891	232.069	40.5849	64.5185	21.4381	17.8694	6.66437	11.589	protein_coding
XLOC_010264	Pygl	27.4938	39.4515	25.7517	74.2622	247.672	355.381	307.59	123.1	299.897	181.561	protein_coding
XLOC_010265	Trim9	0	1.16034	0	0	0	4.23072	29.8269	43.6808	116.15	137.137	protein_coding
XLOC_010296	Hif1a	0.916462	0	7.10392	4.12568	124.877	116.345	34.4874	17.8694	56.1711	37.6643	protein_coding
XLOC_010306	Tex21	147.55	118.355	214.893	218.661	99.9013	93.0759	3.72837	5.95647	1.9041	1.9315	protein_coding
XLOC_010313	Sptb	80.6486	190.296	277.941	434.228	872.055	827.106	98.8017	100.267	63.7875	44.4246	protein_coding
XLOC_010314	Gpx2	523.3	433.967	204.238	119.645	33.3004	29.6151	13.9814	7.94196	25.7054	17.3835	protein_coding
XLOC_010343	Zfp36l1	210.786	235.549	387.163	351.714	272.647	411.438	1537.02	1878.27	2071.67	1590.59	protein_coding
XLOC_010383	Dpf3	2.74938	5.8017	1.77598	0	4.16255	14.8075	59.6538	55.5937	75.2121	115.89	protein_coding
XLOC_010412	Rps6kl1	385.83	178.692	208.678	235.164	144.649	121.633	49.4008	37.7243	41.8903	42.4931	protein_coding
XLOC_010427	Tgfb3	0	0	0	9.28278	5.20319	20.0959	66.1785	67.5067	143.76	351.534	protein_coding
XLOC_010443	Ism2	162.214	256.435	23.0877	17.5341	24.9753	38.0765	27.0306	28.7896	15.2328	8.69177	protein_coding
XLOC_010554	Asb2	109.975	78.9031	7.99191	0	6.24383	1.05768	1.86418	0	0.952052	0.965752	protein_coding
XLOC_010587	Gsc	79.7322	80.0634	2.66397	2.06284	3.12191	464.322	2.79627	2.97823	2.85616	0.965752	protein_coding
XLOC_010618	Bcl11b	6.41523	11.6034	31.0796	51.571	118.633	85.6722	12.1172	8.9347	21.8972	127.479	protein_coding
XLOC_010654	Hsp90aa1	116663	84803.4	95042.4	77715.4	27811.1	34260.4	18663.3	16684.1	12947.9	13711.8	protein_coding
XLOC_010667	Gm266	0	1.16034	0	11.3456	9.36574	2.11536	23.3023	19.8549	47.6026	57.9451	protein_coding
XLOC_010672	Ckb	14265.6	8752.44	2108.09	2329.98	479.734	645.185	959.122	621.458	3432.15	3216.92	protein_coding
XLOC_010691	Ahnak2	340.007	228.587	176.71	183.593	145.689	186.152	40.0799	30.7751	24.7534	18.3493	protein_coding
XLOC_010872	Itgb8	0	0	22.1997	110.362	130.08	86.7298	258.189	404.047	713.087	925.191	protein_coding
XLOC_010930	Adarb2	9.16462	18.5654	15.9838	14.4399	61.3976	33.8458	37.2837	69.4921	114.246	139.068	protein_coding
XLOC_010960	Nid1	2740.22	5538.3	847.142	501.27	466.206	386.054	731.692	484.46	608.361	435.554	protein_coding
XLOC_010972	Gli3	189.708	200.739	282.381	503.333	625.423	599.705	1877.23	2679.42	1686.08	1795.33	protein_coding
XLOC_011007	Sfrp4	42.1572	33.6498	86.135	45.3825	19.7721	12.6922	1.86418	3.97098	2.85616	5.79451	protein_coding
XLOC_011174	Agtr1a	0	0	7.10392	6.18852	17.6908	5.2884	89.4808	51.6227	79.9724	40.5616	protein_coding
XLOC_011194	Foxc1	10.9975	13.9241	11.5439	7.21994	9.36574	15.8652	169.641	136.006	171.369	243.37	protein_coding
XLOC_011256	Dsp	479.309	689.241	168.718	665.266	1278.94	3255.54	2677.9	3827.03	2136.41	1553.9	protein_coding
XLOC_011275	Sycp2l	98.9778	56.8566	8.8799	5.1571	2.08128	1.05768	0	0	0	0.965752	protein_coding
XLOC_011320	Rbm24	7.33169	16.2447	4.43995	12.377	19.7721	43.3649	72.7031	61.5502	81.8765	76.2944	protein_coding
XLOC_011328	Rnf144b	25.6609	52.2153	6.21593	20.6284	3.12191	4.23072	55.9255	41.6953	85.6847	76.2944	protein_coding
XLOC_011343	Id4	461.897	236.709	87.911	88.7021	30.1785	56.0571	47.5367	63.5357	188.506	219.226	protein_coding
XLOC_011394	S1pr3	24.7445	17.4051	18.6478	15.4713	17.6908	16.9229	48.4688	112.18	166.609	552.41	protein_coding
XLOC_011401	Gadd45g	6.41523	81.2237	141.19	163.996	55.1538	40.1919	84.8203	111.187	238.965	309.041	protein_coding
XLOC_011404	Syk	396.828	357.384	899.533	609.569	343.411	261.247	45.6725	38.7171	20.9452	45.3904	protein_coding
XLOC_011408	Necsulea_Locus_86888|Necsulea_Locus_87613	0.916462	2.32068	103.895	102.111	113.43	34.9035	13.0493	1.98549	1.9041	1.9315	lincRNA
XLOC_011415	Cplx2	7.33169	13.9241	3.55196	11.3456	40.5849	52.884	98.8017	221.382	126.623	172.87	protein_coding
XLOC_011423	Cdhr2	1.83292	2.32068	8.8799	1.03142	6.24383	3.17304	91.345	11.9129	39.9862	7.72602	protein_coding
XLOC_011431	Unc5a	8.24815	19.7258	7.99191	8.25136	67.6415	34.9035	409.188	536.082	1089.15	809.3	protein_coding
XLOC_011464	NA	0	0	0	0	1.04064	0	12.1172	18.8622	37.13	40.5616	lincRNA
XLOC_011473	Tgfbi	184.209	265.718	45.2875	18.5656	13.5283	16.9229	68.9748	160.825	108.534	319.664	protein_coding
XLOC_011495	Ntrk2	0	2.32068	6.21593	14.4399	80.1291	16.9229	102.53	55.5937	271.335	232.746	protein_coding
XLOC_011499	Spata31d1b	43.0737	35.9705	161.614	82.5136	34.3411	25.3843	0.932091	0	0.952052	2.89726	protein_coding
XLOC_011620	Guttman_lincRNA_2496	69.6511	53.3756	39.0715	38.1625	42.6662	9.51913	2.79627	3.97098	1.9041	0	lincRNA
XLOC_011669	Irx2	115.474	87.0254	13.3198	18.5656	19.7721	20.0959	106.258	88.3543	140.904	183.493	protein_coding
XLOC_011692	Erap1	44.9066	41.7722	135.862	242.384	391.28	456.918	319.707	218.404	267.527	278.137	protein_coding
XLOC_011739	Mef2c	0	0	4.43995	12.377	2.08128	7.40377	7.45673	57.5792	4.76026	76.2944	protein_coding
XLOC_011771	Edil3	0	0	0	0	8.3251	9.51913	75.4994	101.26	131.383	227.918	protein_coding
XLOC_011772	Hapln1	0	0	0	2.06284	0	0	306.658	283.925	94.2532	100.438	protein_coding
XLOC_011805	Lhfpl2	455.481	323.735	46.1755	63.948	90.5355	240.094	1266.71	1482.17	1532.8	1436.07	protein_coding
XLOC_011833	Gcnt4	115.474	140.401	8.8799	11.3456	36.4223	35.9612	235.819	207.484	386.533	309.041	protein_coding
XLOC_011849	Foxd1	18.3292	19.7258	7.10392	3.09426	3.12191	0	75.4994	124.093	163.753	170.938	protein_coding
XLOC_011860	Gm807	88.8968	62.6583	13.3198	3.09426	1.04064	0	0.932091	0.992745	0.952052	0	lincRNA
XLOC_011866	Serf1	12.8305	37.1309	71.0392	64.9794	69.7228	89.9029	150.999	167.774	202.787	278.137	protein_coding
XLOC_011896	Adamts6	0.916462	1.16034	94.1269	94.8906	297.622	325.766	109.055	272.012	177.082	244.335	protein_coding
XLOC_011917	Elovl7	433.486	456.013	73.7031	53.6338	88.4542	132.21	68.0427	36.7316	39.9862	18.3493	protein_coding
XLOC_011953	Ppap2a	430.737	416.562	143.854	115.519	67.6415	62.4032	59.6538	71.4776	45.6985	69.5342	protein_coding
XLOC_011956	Ccno	16.4963	32.4895	56.8313	34.0369	16.6502	304.612	2.79627	1.98549	0	1.9315	protein_coding
XLOC_011968	Guttman_lincRNA_2585	69.6511	27.8481	38.1836	33.0054	12.4877	7.40377	0	0.992745	0	0	lincRNA
XLOC_011981	Emb	1253.72	977.006	3160.35	4720.81	5106.41	11105.6	3500.94	2368.69	1411.89	827.65	protein_coding
XLOC_011990	Gm21967	2.74938	5.8017	31.0796	37.1311	44.7474	42.3072	96.9375	95.3035	130.431	122.651	protein_coding
XLOC_012075	Edaradd	1.83292	0	13.3198	8.25136	5.20319	7.40377	54.9934	49.6372	79.0203	43.4589	protein_coding
XLOC_012076	Ero1lb	11.914	34.8102	16.8718	29.9112	84.2917	42.3072	81.0919	85.3761	132.335	178.664	protein_coding
XLOC_012090	Hecw1	0.916462	0	13.3198	11.3456	32.2598	31.7304	18.6418	32.7606	31.4177	91.7465	protein_coding
XLOC_012360	Sox4	262.108	428.165	1254.73	1652.33	1502.68	1752.58	2635.02	2701.26	3141.77	4201.02	protein_coding
XLOC_012393	Serpinb1a	143.884	152.004	9.76789	3.09426	1.04064	1.05768	0	0	0.952052	0	protein_coding
XLOC_012406	Serpinb6c	1504.83	977.006	311.684	92.8278	33.3004	37.0188	47.5367	18.8622	25.7054	5.79451	protein_coding
XLOC_012407	Serpinb6a	1922.74	1442.3	1519.35	1430.58	511.994	681.147	571.372	298.816	286.568	258.822	protein_coding
XLOC_012430	Nrn1	0.916462	1.16034	1.77598	2.06284	3.12191	5.2884	62.4501	20.8476	47.6026	36.6986	protein_coding
XLOC_012467	Nedd9	25.6609	19.7258	21.3117	25.7855	40.5849	122.691	1089.61	886.521	1531.85	1786.64	protein_coding
XLOC_012470	Adtrp	47.656	29.0085	0.88799	0	0	0	1.86418	0.992745	1.9041	5.79451	protein_coding
XLOC_012520	NA	0	0	0	0	0	0	14.9135	22.8331	37.13	44.4246	lincRNA
XLOC_012536	Phf2	97.1449	134.599	55.0554	62.9166	177.949	144.902	288.948	446.735	479.834	556.273	protein_coding
XLOC_012542	Fgd3	0	0	5.32794	2.06284	2.08128	2.11536	33.5553	43.6808	73.308	73.3972	protein_coding
XLOC_012596	Diras2	2.74938	2.32068	7.10392	9.28278	3.12191	8.46145	9.32091	36.7316	47.6026	124.582	protein_coding
XLOC_012610	Msx2	4.58231	8.12237	2.66397	8.25136	3.12191	25.3843	49.4008	44.6735	55.219	99.4725	protein_coding
XLOC_012628	Cltb	1020.02	794.832	404.923	227.944	64.5196	47.5956	71.771	68.4994	39.0341	117.822	protein_coding
XLOC_012630	Gprin1	0	0	2.66397	19.597	34.3411	26.442	32.6232	79.4196	95.2052	239.507	protein_coding
XLOC_012655	Pitx1	1.83292	5.8017	0	1.03142	1.04064	1.05768	88.5487	50.63	183.746	143.897	protein_coding
XLOC_012667	Neurog1	0	0	0	0	0	0	40.0799	38.7171	114.246	196.048	protein_coding
XLOC_012673	Necsulea_blastnPan.Locus_176573	0	0	0.88799	1.03142	2.08128	121.633	3.72837	8.9347	22.8493	20.2808	lincRNA
XLOC_012700	Spata31d1a	60.4865	34.8102	79.0311	53.6338	20.8128	23.269	1.86418	8.9347	0.952052	0.965752	protein_coding
XLOC_012709	Gas1	57.7371	77.7427	42.6235	53.6338	118.633	60.2878	1575.23	1227.03	1585.17	1765.4	protein_coding
XLOC_012770	Fbp2	78.8157	68.46	38.1836	12.377	0	1.05768	3.72837	1.98549	2.85616	0.965752	protein_coding
XLOC_012802	Nlrp4f	1267.47	1046.63	1277.82	728.182	54.1132	99.422	27.0306	19.8549	10.4726	8.69177	protein_coding
XLOC_012888	Adcy2	3.66585	8.12237	5.32794	19.597	27.0566	56.0571	110.919	105.231	140.904	123.616	protein_coding
XLOC_012909	Irx1	0.916462	0	3.55196	8.25136	10.4064	24.3267	54.9934	63.5357	85.6847	164.178	protein_coding
XLOC_012969	Nr2f1	5.49877	1.16034	3.55196	2.06284	0	0	734.488	1029.48	1415.7	1810.79	protein_coding
XLOC_013006	NA	62.3194	39.4515	75.4791	33.0054	62.4383	14.8075	7.45673	1.98549	22.8493	3.86301	lincRNA
XLOC_013014	Vcan	1227.14	1200.95	431.563	730.245	642.074	524.61	4381.76	8992.28	4603.17	5622.61	protein_coding
XLOC_013059	F2rl1	498.555	456.013	860.462	386.782	529.685	725.569	125.832	90.3398	51.4108	37.6643	protein_coding
XLOC_013060	F2r	210.786	206.54	293.037	509.521	574.432	728.742	1350.6	1449.41	1466.16	1776.98	protein_coding
XLOC_013071	Gm6169	164.963	1.16034	0.88799	134.085	0	124.806	0.932091	45.6663	0	28.0068	protein_coding
XLOC_013073	Hexb	4667.54	4736.5	1847.02	2089.66	2680.68	2011.71	1010.39	546.01	774.971	598.766	protein_coding
XLOC_013076	NA	0.916462	0	89.6869	55.6967	61.3976	25.3843	2.79627	0.992745	0	0	lincRNA
XLOC_013091	Arhgef28	4.58231	3.48102	128.758	87.6707	212.29	157.594	249.8	178.694	232.301	137.137	protein_coding
XLOC_013116	Map1b	843.145	1001.37	1859.45	1500.72	2507.94	2099.5	2264.05	3552.04	5692.32	7625.58	protein_coding
XLOC_013205	Rab3c	0	0	0	0	3.12191	1.05768	3.72837	5.95647	69.4998	102.37	protein_coding
XLOC_013227	Ddx4	85.2309	189.135	182.038	139.242	180.03	52.884	50.3329	26.8041	35.2259	9.65752	protein_coding
XLOC_013231	Gpx8	10.0811	20.8861	34.6316	90.7649	73.8853	139.614	172.437	146.926	232.301	287.794	protein_coding
XLOC_013248	Fst	92.5626	73.1014	35.5196	70.1365	78.0479	975.182	428.762	258.114	447.465	219.226	protein_coding
XLOC_013251	Itga2	0	1.16034	0	0	0	0	46.6046	52.6155	22.8493	16.4178	protein_coding
XLOC_013261	Parp8	6.41523	4.64136	9.76789	41.2568	67.6415	120.576	91.345	128.064	146.616	150.657	protein_coding
XLOC_013431	Guttman_lincRNA_2590	49.4889	55.6963	11.5439	4.12568	29.1379	6.34609	0.932091	0	0	0	lincRNA
XLOC_013517	Anxa11	243.779	444.41	570.977	485.799	597.326	424.13	95.0733	111.187	65.6916	43.4589	protein_coding
XLOC_013536	Hesx1	303.349	126.477	44.3995	35.0683	17.6908	15.8652	12.1172	2.97823	5.71231	0.965752	protein_coding
XLOC_013543	Wnt5a	0	0	5.32794	2.06284	5.20319	25.3843	105.326	145.934	134.239	245.301	protein_coding
XLOC_013613	Anxa8	64.1523	53.3756	102.119	78.3879	7.28447	14.8075	6.52464	1.98549	2.85616	2.89726	protein_coding
XLOC_013621	Mmrn2	465.562	346.941	178.486	117.582	10.4064	15.8652	15.8456	43.6808	32.3698	115.89	protein_coding
XLOC_013744	Samd4	10.0811	15.0844	34.6316	146.462	148.811	161.825	291.745	258.114	266.575	275.239	protein_coding
XLOC_013747	Lgals3	57.7371	22.0464	1035.4	415.662	73.8853	140.672	22.3702	15.8839	28.5616	13.5205	protein_coding
XLOC_013799	Pnp	1046.6	604.537	3630.99	2451.68	610.855	934.99	471.638	514.242	402.718	496.397	protein_coding
XLOC_013800	Pnp2	72.4005	47.5739	666.88	272.295	61.3976	69.8069	14.9135	14.8912	19.041	15.452	protein_coding
XLOC_013803	Ang	17.4128	12.7637	19.5358	41.2568	45.7881	88.8452	99.7338	149.904	132.335	129.411	protein_coding
XLOC_014021	Rem2	2.74938	3.48102	27.5277	92.8278	41.6255	66.6339	43.8083	81.4051	89.4929	132.308	protein_coding
XLOC_014040	Lrrc16b	8.24815	9.28271	17.7598	10.3142	104.064	50.7687	82.9561	184.651	204.691	203.774	protein_coding
XLOC_014042	Pck2	2439.62	2231.33	601.169	347.588	404.808	416.726	293.609	254.143	345.595	552.41	protein_coding
XLOC_014081	Fgf9	0	1.16034	0.88799	2.06284	4.16255	1.05768	118.376	170.752	234.205	108.164	protein_coding
XLOC_014099	Amer2	0.916462	2.32068	8.8799	14.4399	3.12191	22.2113	51.265	89.347	180.89	229.849	protein_coding
XLOC_014102	Spata13	173.211	191.456	972.349	1090.21	1034.39	1373.93	1360.85	1337.23	929.203	854.691	protein_coding
XLOC_014112	Kcnrg	1332.54	1148.74	934.165	802.445	268.485	301.439	157.523	104.238	93.3011	124.582	protein_coding
XLOC_014140	Fam167a	24.7445	25.5275	24.8637	28.8798	17.6908	56.0571	275.899	339.519	379.869	302.28	protein_coding
XLOC_014144	NA	0	2.32068	0	0	6.24383	11.6345	41.9441	65.5212	59.9793	88.8492	lincRNA
XLOC_014147	Sox7	8.24815	4.64136	8.8799	4.12568	39.5442	12.6922	88.5487	50.63	62.8355	48.2876	protein_coding
XLOC_014171	Stmn4	0	0	5.32794	49.5081	19.7721	7.40377	0.932091	2.97823	39.0341	48.2876	protein_coding
XLOC_014180	Ebf2	0	3.48102	0	0	1.04064	1.05768	5.59255	14.8912	59.9793	82.089	protein_coding
XLOC_014185	Nefl	382.164	298.207	476.85	414.631	356.939	679.031	66.1785	75.4486	579.8	861.451	protein_coding
XLOC_014190	Stc1	0	0	21.3117	7.21994	79.0885	93.0759	54.0613	55.5937	89.4929	110.096	protein_coding
XLOC_014212	Dok2	30.2432	12.7637	281.493	601.318	119.673	137.499	18.6418	36.7316	16.1849	13.5205	protein_coding
XLOC_014228	Lpar6	102.644	34.8102	136.75	289.829	202.924	263.363	396.139	426.88	351.307	480.945	protein_coding
XLOC_014239	Lcp1	67.8182	44.0929	6.21593	23.7227	70.7634	276.055	204.128	132.035	99.9655	90.7807	protein_coding
XLOC_014296	Pcdh17	0.916462	0	20.4238	69.1051	38.5036	24.3267	18.6418	63.5357	44.7465	114.925	protein_coding
XLOC_014340	Klf5	2085.87	1869.31	1758.22	793.162	289.297	247.497	114.647	75.4486	127.575	79.1917	protein_coding
XLOC_014420	Slitrk5	4.58231	4.64136	37.2956	109.33	130.08	92.0182	229.294	240.244	411.287	380.506	protein_coding
XLOC_014421	NA	0	1.16034	7.10392	11.3456	22.894	23.269	53.1292	58.572	79.9724	60.8424	lincRNA
XLOC_014444	Gpc6	24.7445	51.0549	15.9838	40.2254	103.023	181.921	809.987	1102.94	987.278	887.526	protein_coding
XLOC_014614	Rarb	1.83292	3.48102	6.21593	2.06284	15.6096	13.7499	1581.76	1604.28	2157.35	2832.55	protein_coding
XLOC_014676	Anxa7	2728.31	2041.04	2058.36	1693.59	1012.54	1168.74	704.661	364.337	381.773	339.945	protein_coding
XLOC_014696	Zfp503	7.33169	8.12237	4.43995	3.09426	9.36574	7.40377	489.348	461.626	607.409	659.609	protein_coding
XLOC_014767	Stab1	0.916462	0	7.10392	1.03142	7.28447	5.2884	56.8576	157.846	28.5616	142.931	protein_coding
XLOC_014795	Zfp488	109.975	281.962	198.022	195.97	1013.58	624.032	554.594	989.767	646.444	646.088	protein_coding
XLOC_014807	Mmrn2	10.0811	22.0464	19.5358	30.9426	79.0885	77.2107	92.277	162.81	68.5478	108.164	protein_coding
XLOC_014960	Bmp4	28.4103	30.1688	643.792	288.798	27.0566	59.2301	69.9069	71.4776	77.1162	109.13	protein_coding
XLOC_014993	Otx2	22.9115	22.0464	538.122	691.051	1861.7	1933.44	69.9069	28.7896	29.5136	8.69177	protein_coding
XLOC_015021	Ccnb1ip1	208.953	194.937	257.517	188.75	122.795	89.9029	19.5739	13.8984	10.4726	2.89726	protein_coding
XLOC_015062	Sall2	88.8968	124.156	190.03	696.208	1150.95	732.973	1042.08	1139.67	1012.03	1190.77	protein_coding
XLOC_015075	Slc7a7	203.454	162.447	1298.24	1168.6	829.389	769.992	111.851	62.5429	55.219	62.7739	protein_coding
XLOC_015101	Jph4	0.916462	1.16034	28.4157	64.9794	133.202	60.2878	10.253	6.94921	12.3767	16.4178	protein_coding
XLOC_015115	Tgm1	1175.82	1459.71	813.398	368.217	29.1379	40.1919	84.8203	23.8259	44.7465	17.3835	protein_coding
XLOC_015120	Ripk3	305.182	334.178	253.965	154.713	64.5196	77.2107	15.8456	16.8767	12.3767	11.589	protein_coding
XLOC_015123	Sdr39u1	100.811	127.637	51.5034	11.3456	11.447	8.46145	28.8948	6.94921	15.2328	11.589	protein_coding
XLOC_015156	Il17d	38.4914	37.1309	499.938	278.483	149.852	171.344	35.4195	24.8186	27.6095	15.452	protein_coding
XLOC_015175	Phf11d	1246.39	842.406	405.811	184.624	44.7474	86.7298	87.6166	66.5139	29.5136	28.9726	protein_coding
XLOC_015199	Dleu7	10.9975	15.0844	8.8799	11.3456	7.28447	4.23072	85.7524	80.4123	79.9724	84.0205	protein_coding
XLOC_015209	Gata4	21.0786	48.7342	12.4319	15.4713	100.942	299.324	481.891	543.031	352.259	312.904	protein_coding
XLOC_015223	Fzd3	105.393	333.017	351.644	448.668	754.463	859.895	3645.41	4192.36	5700.89	6312.16	protein_coding
XLOC_015228	Esco2	4267.05	3591.25	3638.98	2809.59	1500.6	1250.18	736.352	597.632	595.033	626.773	protein_coding
XLOC_015232	Ephx2	1623.05	789.031	388.051	217.63	499.506	376.534	62.4501	50.63	59.9793	24.1438	protein_coding
XLOC_015233	Ptk2b	56.8206	129.958	418.243	325.929	213.331	188.267	65.2464	42.688	22.8493	11.589	protein_coding
XLOC_015238	Dpysl2	192.457	371.309	346.316	1058.24	1125.97	1187.78	2151.27	2744.94	3409.3	4068.71	protein_coding
XLOC_015253	Nefm	45.8231	19.7258	45.2875	144.399	233.103	314.131	23.3023	44.6735	482.691	603.595	protein_coding
XLOC_015277	Pdlim2	3.66585	3.48102	31.9676	83.545	63.4789	65.5762	37.2837	5.95647	22.8493	11.589	protein_coding
XLOC_015278	Sorbs3	1.83292	22.0464	12.4319	26.8169	74.9259	96.249	75.4994	74.4559	66.6437	65.6712	protein_coding
XLOC_015279	Ppp3cc	15.5798	33.6498	15.9838	7.21994	34.3411	28.5574	87.6166	112.18	142.808	143.897	protein_coding
XLOC_015280	Slc39a14	29.3268	30.1688	2046.82	1741.04	933.452	475.956	559.255	613.516	959.669	1064.26	protein_coding
XLOC_015286	Bmp1	7.33169	16.2447	17.7598	61.8852	108.226	122.691	230.227	402.062	264.671	491.568	protein_coding
XLOC_015289	Dmtn	1139.16	876.056	274.389	181.53	126.958	118.46	30.759	36.7316	39.0341	45.3904	protein_coding
XLOC_015290	Fgf17	131.97	150.844	137.638	70.1365	19.7721	47.5956	2.79627	2.97823	1.9041	2.89726	protein_coding
XLOC_015307	NA	0	0	0	0	0	0	14.9135	77.4341	19.041	31.8698	lincRNA
XLOC_015348	4930444M15Rik	32.0762	13.9241	68.3752	30.9426	3.12191	3.17304	0.932091	1.98549	0.952052	0.965752	lincRNA
XLOC_015368	Tnfsf11	1.83292	0	75.4791	58.7909	17.6908	15.8652	12.1172	5.95647	3.80821	1.9315	protein_coding
XLOC_015387	Pcdh8	1.83292	2.32068	7.99191	2.06284	11.447	57.1148	147.27	68.4994	113.294	169.007	protein_coding
XLOC_015503	Ednrb	0.916462	1.16034	1.77598	4.12568	3.12191	0	960.986	495.38	1352.87	1479.53	protein_coding
XLOC_015527	Spry2	639.69	589.452	1154.39	843.701	658.724	631.436	167.776	177.701	139	152.589	protein_coding
XLOC_015563	Sox21	54.0712	49.8946	34.6316	45.3825	5.20319	33.8458	84.8203	85.3761	129.479	170.938	protein_coding
XLOC_015580	Slc15a1	159.464	168.249	158.95	56.7281	19.7721	14.8075	8.38882	8.9347	2.85616	0	protein_coding
XLOC_015589	Zic5	210.786	179.853	285.045	559.03	939.696	730.858	164.048	108.209	155.185	152.589	protein_coding
XLOC_015618	Sepp1	33.9091	22.0464	242.421	384.72	296.582	592.301	1031.83	309.736	416.047	365.054	protein_coding
XLOC_015641	Dab2	52.2383	54.5359	92.3509	161.933	826.267	482.303	1006.66	551.966	588.368	337.048	protein_coding
XLOC_015668	Capsl	68.7346	81.2237	69.2632	45.3825	15.6096	49.711	3.72837	6.94921	2.85616	0	protein_coding
XLOC_015679	Adamts12	0	0	0.88799	7.21994	5.20319	15.8652	81.0919	147.919	147.568	173.835	protein_coding
XLOC_015703	Cdh9	0	0	14.2078	57.7595	34.3411	9.51913	0.932091	0.992745	0	1.9315	protein_coding
XLOC_015760	Sema5a	31.1597	44.0929	47.0634	108.299	219.575	245.382	278.695	315.693	350.355	365.054	protein_coding
XLOC_015798	Grhl2	15.5798	37.1309	1126.86	1045.86	637.911	611.34	248.868	239.252	256.102	175.767	protein_coding
XLOC_015817	Cthrc1	8.24815	6.96204	142.966	267.138	259.119	283.458	63.3822	37.7243	39.0341	46.3561	protein_coding
XLOC_015833	Guttman_lincRNA_2731	56.8206	34.8102	42.6235	22.6912	42.6662	8.46145	1.86418	0	0	0	lincRNA
XLOC_015870	Aard	178.71	162.447	411.139	284.672	15.6096	38.0765	22.3702	71.4776	14.2808	27.0411	protein_coding
XLOC_015881	Mal2	4.58231	10.4431	90.5749	157.807	178.99	137.499	28.8948	27.7969	49.5067	94.6437	protein_coding
XLOC_015885	Deptor	438.985	1153.38	338.324	376.468	703.471	662.108	178.029	181.672	189.458	76.2944	protein_coding
XLOC_015886	Col14a1	0.916462	1.16034	7.10392	4.12568	9.36574	8.46145	2.79627	64.5284	6.66437	72.4314	protein_coding
XLOC_015893	Zhx2	9.16462	18.5654	6.21593	23.7227	68.6821	106.826	215.313	248.186	209.452	211.5	protein_coding
XLOC_015932	Myc	10.9975	5.8017	386.275	187.718	91.5762	144.902	167.776	274.99	88.5409	85.952	protein_coding
XLOC_016037	Ly6e	241.029	371.309	157.174	254.761	294.501	479.129	78.2957	62.5429	67.5957	67.6027	protein_coding
XLOC_016043	Zfp41	268.523	322.574	253.077	311.489	356.939	396.63	1016.91	1182.36	1251.95	1499.81	protein_coding
XLOC_016047	Gsdmd	138.386	109.072	65.7112	25.7855	13.5283	11.6345	14.9135	8.9347	5.71231	11.589	protein_coding
XLOC_016090	Guttman_lincRNA_2786	53.1548	29.0085	38.1836	14.4399	2.08128	3.17304	0	4.96372	0	3.86301	lincRNA
XLOC_016104	Cdc42ep1	21.0786	8.12237	23.0877	29.9112	30.1785	71.9223	385.886	344.483	217.068	154.52	protein_coding
XLOC_016105	Lgals2	0.916462	2.32068	0.88799	0	4.16255	6.34609	30.759	44.6735	36.178	17.3835	protein_coding
XLOC_016114	H1f0	364.752	241.351	385.387	422.882	568.188	1547.39	1458.72	1341.2	2528.65	3078.82	protein_coding
XLOC_016135	Syngr1	1329.79	1000.21	650.008	486.83	371.508	246.44	179.894	115.158	201.835	142.931	protein_coding
XLOC_016143	Fam83f	1.83292	9.28271	28.4157	58.7909	110.308	72.98	11.1851	5.95647	10.4726	8.69177	protein_coding
XLOC_016158	L3mbtl2	2183.93	1938.93	3783.72	2596.08	1422.55	1545.27	644.075	586.712	416.047	417.205	protein_coding
XLOC_016168	1700029P11Rik	55.9042	60.3376	55.9433	13.4085	5.20319	5.2884	0	5.95647	0.952052	0.965752	protein_coding
XLOC_016177	2003-09-01	71.484	110.232	263.733	299.112	437.068	247.497	483.755	629.4	693.094	828.616	protein_coding
XLOC_016294	CN725425	29.3268	24.3671	107.447	68.0737	44.7474	23.269	21.4381	7.94196	3.80821	1.9315	protein_coding
XLOC_016302	Pdzrn4	146.634	34.8102	11.5439	20.6284	23.9347	50.7687	7.45673	17.8694	90.445	142.931	protein_coding
XLOC_016316	Tmem117	120.973	138.08	4.43995	4.12568	3.12191	2.11536	29.8269	13.8984	19.9931	23.1781	protein_coding
XLOC_016329	Pced1b	858.724	645.149	419.131	300.143	211.25	167.114	93.2091	97.289	58.0752	52.1506	protein_coding
XLOC_016349	Wnt1	0	0	0	0	0	0	192.943	110.195	218.02	107.199	protein_coding
XLOC_016353	4930578M01Rik	6.41523	2.32068	7.10392	5.1571	2.08128	3.17304	15.8456	36.7316	62.8355	56.0136	lincRNA
XLOC_016357	Prph	28.4103	84.7048	276.165	423.914	173.787	68.7493	51.265	9.92745	13.3287	18.3493	protein_coding
XLOC_016364	Kcnh3	85.2309	84.7048	42.6235	75.2936	17.6908	5.2884	1.86418	3.97098	0.952052	0.965752	protein_coding
XLOC_016392	Letmd1	82.4815	56.8566	23.9757	20.6284	36.4223	34.9035	353.263	327.606	483.643	370.849	protein_coding
XLOC_016413	Krt7	135.636	196.097	11.5439	58.7909	54.1132	88.8452	254.461	109.202	205.643	150.657	protein_coding
XLOC_016416	Krt18	53.1548	119.515	253.077	763.251	1943.91	2551.13	2988.28	2816.42	2443.92	1754.77	protein_coding
XLOC_016430	Amhr2	151.216	157.806	100.343	46.4139	29.1379	39.1342	9.32091	4.96372	5.71231	28.0068	protein_coding
XLOC_016443	Hoxc13	79.7322	106.751	10.6559	7.21994	3.12191	1.05768	2.79627	0.992745	2.85616	1.9315	protein_coding
XLOC_016444	Hoxc12	274.022	190.296	9.76789	4.12568	2.08128	0	0.932091	0.992745	0	0	protein_coding
XLOC_016454	Hoxc6	0	0	0	0	0	0	8.38882	9.92745	35.2259	74.3629	protein_coding
XLOC_016457	NA	0	0	0.88799	0	2.08128	2.11536	114.647	296.831	263.719	312.904	lincRNA
XLOC_016459	NA	0	0	0	0	1.04064	0	46.6046	83.3906	112.342	113.959	lincRNA
XLOC_016461	NA	0	0	0	0	0	1.05768	8.38882	23.8259	39.9862	57.9451	lincRNA
XLOC_016472	Ghr	19.2457	15.0844	33.7436	73.2308	94.6981	159.71	329.96	235.281	278.951	406.582	protein_coding
XLOC_016501	Slc1a3	163.13	158.966	373.844	358.934	442.271	315.189	321.572	271.019	1521.38	1072.95	protein_coding
XLOC_016528	Npr3	77.8992	185.654	63.0473	68.0737	35.3817	15.8652	105.326	181.672	602.649	1090.33	protein_coding
XLOC_016531	Guttman_lincRNA_2716	49.4889	13.9241	33.7436	16.5027	2.08128	6.34609	0	0	0	0	lincRNA
XLOC_016553	Cdh6	3.66585	0	2.66397	3.09426	28.0972	42.3072	586.285	885.529	827.334	705.965	protein_coding
XLOC_016583	Basp1	255.693	280.802	1846.13	2171.14	1047.92	1226.91	996.406	1078.12	1274.8	1987.52	protein_coding
XLOC_016589	Fbxl7	4.58231	9.28271	15.9838	29.9112	66.6008	44.4226	189.215	457.655	401.766	414.308	protein_coding
XLOC_016596	Trio	190.624	410.76	810.734	1612.11	3125.04	2159.78	2607.06	3447.8	2744.77	3064.33	protein_coding
XLOC_016701	Dpys	291.435	191.456	9.76789	15.4713	11.447	7.40377	0.932091	0	0	0	protein_coding
XLOC_016710	Angpt1	5.49877	0	0	4.12568	1.04064	0	40.0799	119.129	77.1162	234.678	protein_coding
XLOC_016717	Tmem74	3.66585	1.16034	23.9757	46.4139	36.4223	24.3267	28.8948	58.572	63.7875	80.1574	protein_coding
XLOC_016762	Enpp2	0	2.32068	177.598	449.699	727.406	776.338	19.5739	18.8622	28.5616	111.062	protein_coding
XLOC_016775	Has2	5.49877	2.32068	103.007	410.505	370.467	350.092	390.546	495.38	512.204	360.226	protein_coding
XLOC_016788	Fbxo32	6.41523	5.8017	71.9272	134.085	198.762	114.23	233.955	181.672	237.061	188.322	protein_coding
XLOC_016835	Adcy8	0.916462	0	0	1.03142	0	19.0383	57.7897	171.745	127.575	109.13	protein_coding
XLOC_016840	Kcnq3	3.66585	0	6.21593	9.28278	73.8853	78.2684	13.0493	41.6953	16.1849	18.3493	protein_coding
XLOC_016848	St3gal1	4.58231	9.28271	8.8799	8.25136	64.5196	63.4609	462.317	425.888	509.348	366.02	protein_coding
XLOC_016868	Col22a1	8.24815	12.7637	10.6559	12.377	28.0972	40.1919	208.788	264.07	310.369	246.267	protein_coding
XLOC_016922	Naprt1	56.8206	51.0549	389.827	382.657	127.998	142.787	83.8882	47.6518	34.2739	33.8013	protein_coding
XLOC_016944	Scrt1	0	0	0	1.03142	5.20319	3.17304	1.86418	1.98549	44.7465	96.5752	protein_coding
XLOC_016947	Slc39a4	878.887	905.065	431.563	368.217	322.598	294.035	290.813	85.3761	79.9724	30.9041	protein_coding
XLOC_016950	Foxh1	810.152	538.397	793.863	1161.38	740.934	1041.82	159.388	83.3906	22.8493	7.72602	protein_coding
XLOC_016988	Tst	502.221	352.743	269.949	208.347	88.4542	75.0953	67.1106	56.5865	36.178	30.9041	protein_coding
XLOC_017027	Cbx7	1646.88	1159.18	2085.89	1690.5	1816.95	1190.95	598.403	336.541	382.725	151.623	protein_coding
XLOC_017060	AI848285	133.803	139.241	82.583	81.4822	104.064	45.4803	45.6725	29.7823	13.3287	7.72602	protein_coding
XLOC_017092	A4galt	1335.28	1326.27	252.189	203.19	186.274	250.67	158.456	62.5429	69.4998	36.6986	protein_coding
XLOC_017103	Scube1	0.916462	4.64136	4.43995	7.21994	11.447	3.17304	275.899	378.236	472.218	586.212	protein_coding
XLOC_017105	Sult4a1	62.3194	95.1478	397.819	311.489	207.087	194.613	45.6725	33.7533	21.8972	36.6986	protein_coding
XLOC_017122	Wnt7b	13.7469	10.4431	29.3037	61.8852	19.7721	8.46145	96.0054	19.8549	160.897	178.664	protein_coding
XLOC_017153	Mapk12	21.0786	39.4515	99.4548	175.341	359.02	288.747	309.454	371.287	301.801	234.678	protein_coding
XLOC_017175	Kif21a	165.88	256.435	384.499	796.256	965.712	1230.08	990.813	1129.74	1844.13	1962.41	protein_coding
XLOC_017176	Abcd2	0	0	7.10392	14.4399	29.1379	27.4997	69.9069	112.18	238.013	319.664	protein_coding
XLOC_017192	Prickle1	6.41523	12.7637	82.583	302.206	372.548	662.108	529.428	518.213	411.287	344.774	protein_coding
XLOC_017199	Adamts20	3.66585	4.64136	3.55196	7.21994	9.36574	8.46145	94.1412	135.013	172.321	224.055	protein_coding
XLOC_017205	Nell2	36.6585	41.7722	63.0473	81.4822	91.5762	51.8264	115.579	193.585	535.053	811.232	protein_coding
XLOC_017207	Dbx2	2.74938	0	1.77598	1.03142	2.08128	2.11536	6.52464	7.94196	44.7465	65.6712	protein_coding
XLOC_017236	Necsulea_CUFF.183399	30.2432	18.5654	40.8475	60.8538	23.9347	16.9229	3.72837	1.98549	1.9041	0	lincRNA
XLOC_017240	Necsulea_Locus_22428|Guttman_lincRNA_2851|Necsulea_Locus_21016	328.093	251.794	342.764	360.997	151.933	86.7298	83.8882	32.7606	46.6506	15.452	lincRNA
XLOC_017250	Col2a1	20.1622	39.4515	55.9433	128.927	151.933	131.152	3047.01	2884.92	2431.54	1688.14	protein_coding
XLOC_017271	Adcy6	12.8305	45.2532	60.3833	82.5136	239.347	417.784	640.347	671.096	776.875	798.677	protein_coding
XLOC_017276	Wnt10b	1.83292	3.48102	1.77598	2.06284	3.12191	4.23072	123.968	50.63	70.4519	26.0753	protein_coding
XLOC_017277	Ddn	16.4963	5.8017	0.88799	1.03142	2.08128	0	26.0986	28.7896	101.87	70.4999	protein_coding
XLOC_017318	Smagp	260.275	306.33	230.877	116.55	67.6415	74.0377	51.265	26.8041	33.3218	13.5205	protein_coding
XLOC_017322	Galnt6	1200.56	1254.33	830.27	694.145	319.476	219.998	149.135	79.4196	90.445	35.7328	protein_coding
XLOC_017324	Fignl2	21.0786	67.2997	63.0473	115.519	292.419	389.227	998.27	1020.54	982.518	846.965	protein_coding
XLOC_017353	Krt8	144.801	153.165	227.325	1048.95	1278.94	3906.02	2566.05	2621.84	1858.41	1670.75	protein_coding
XLOC_017361	Itgb7	98.9778	111.393	519.474	97.9849	23.9347	44.4226	8.38882	4.96372	7.61642	7.72602	protein_coding
XLOC_017362	Rarg	68.7346	89.3461	2237.73	837.513	689.943	483.36	205.06	156.854	181.842	223.089	protein_coding
XLOC_017377	Hoxc13	79.7322	90.5065	5.32794	0	0	1.05768	0	0.992745	0	0	protein_coding
XLOC_017380	Necsulea_Locus_22497	0	0	0	0	5.20319	2.11536	23.3023	61.5502	110.438	78.2259	lincRNA
XLOC_017382	Smug1	346.422	352.743	132.31	106.236	129.039	129.037	364.448	453.684	1086.29	1571.28	protein_coding
XLOC_017467	Vasn	10.9975	18.5654	47.0634	62.9166	82.2104	89.9029	192.011	134.021	156.137	212.466	protein_coding
XLOC_017482	Rbfox1	0	0	0	1.03142	4.16255	15.8652	1.86418	1.98549	29.5136	45.3904	protein_coding
XLOC_017489	Abat	13.7469	23.2068	39.9595	26.8169	46.8287	72.98	125.832	60.5574	117.102	285.863	protein_coding
XLOC_017595	Ydjc	182.376	139.241	512.37	438.353	229.981	184.036	72.7031	54.601	49.5067	31.8698	protein_coding
XLOC_017612	Scarf2	12.8305	35.9705	12.4319	27.8483	59.3164	26.442	185.486	87.3616	151.376	122.651	protein_coding
XLOC_017653	Eif2b5	10340.4	8341.68	5410.52	4060.7	1842.97	2332.19	1640.48	1436.5	1343.35	1508.51	protein_coding
XLOC_017694	Fetub	199.789	221.625	36.4076	24.7541	7.28447	10.5768	0.932091	1.98549	0.952052	2.89726	protein_coding
XLOC_017697	Kng1	2.74938	4.64136	6.21593	2.06284	0	0	99.7338	22.8331	26.6575	4.82876	protein_coding
XLOC_017708	St6gal1	94.3955	54.5359	253.965	382.657	510.953	563.744	555.526	678.045	892.073	1345.29	protein_coding
XLOC_017752	Bdh1	690.096	537.237	193.582	153.682	101.983	134.325	54.9934	45.6663	43.7944	88.8492	protein_coding
XLOC_017791	Slc12a8	285.02	233.228	201.574	94.8906	82.2104	56.0571	9.32091	6.94921	11.4246	7.72602	protein_coding
XLOC_017792	Heg1	38.4914	46.4136	31.9676	44.351	71.804	105.768	459.521	483.467	788.299	789.02	protein_coding
XLOC_017793	Muc13	1.83292	5.8017	0	0	39.5442	13.7499	259.121	69.4921	97.1093	18.3493	protein_coding
XLOC_017797	Mylk	5.49877	4.64136	5.32794	5.1571	11.447	11.6345	62.4501	78.4269	75.2121	104.301	protein_coding
XLOC_017824	Ildr1	451.816	374.79	103.895	77.3565	112.389	86.7298	32.6232	19.8549	17.1369	19.315	protein_coding
XLOC_017862	Lsamp	0	0	0.88799	1.03142	0	27.4997	6.52464	21.8404	40.9383	87.8835	protein_coding
XLOC_017889	Ccdc80	0	0	0	0	1.04064	8.46145	41.012	57.5792	69.4998	129.411	protein_coding
XLOC_017906	Dppa4	1091.51	811.077	2967.66	2176.3	616.058	362.785	107.191	80.4123	37.13	20.2808	protein_coding
XLOC_017909	Dppa2	443.567	200.739	1559.31	1131.47	252.875	180.863	80.1599	95.3035	18.089	26.0753	protein_coding
XLOC_017912	Morc1	4448.5	3229.22	3120.4	1576.01	320.517	441.053	49.4008	71.4776	17.1369	11.589	protein_coding
XLOC_017964	Filip1l	0	0	7.10392	7.21994	9.36574	5.2884	25.1665	48.6445	39.9862	70.4999	protein_coding
XLOC_017988	Pros1	2057.46	1424.9	967.021	922.089	168.583	278.17	307.59	262.085	277.999	275.239	protein_coding
XLOC_018000	Vgll3	0.916462	2.32068	39.0715	128.927	79.0885	43.3649	22.3702	10.9202	10.4726	11.589	protein_coding
XLOC_018127	NA	0	0	0	0	0	0	16.7776	43.6808	40.9383	35.7328	lincRNA
XLOC_018225	Olig1	78.8157	97.4685	158.95	122.739	101.983	244.324	4.66046	16.8767	49.5067	28.9726	protein_coding
XLOC_018238	Mrps6	338.174	617.3	276.165	258.886	759.666	937.105	1338.48	1249.87	1850.79	1178.22	protein_coding
XLOC_018246	Clic6	8.24815	16.2447	10.6559	33.0054	416.255	543.648	968.443	607.56	431.28	124.582	protein_coding
XLOC_018261	Cbr3	208.037	157.806	539.898	288.798	160.258	122.691	10.253	5.95647	6.66437	3.86301	protein_coding
XLOC_018270	Ripply3	29.3268	31.3292	61.2713	21.6598	8.3251	20.0959	169.641	251.164	215.164	113.959	protein_coding
XLOC_018413	Pla2g10	28.4103	31.3292	205.126	109.33	88.4542	29.6151	5.59255	5.95647	6.66437	0	protein_coding
XLOC_018478	Gp1bb	4.58231	4.64136	0.88799	11.3456	9.36574	12.6922	62.4501	69.4921	124.719	177.698	protein_coding
XLOC_018520	2510009E07Rik	116.391	199.578	2.66397	1.03142	11.447	24.3267	116.511	89.347	162.801	147.76	protein_coding
XLOC_018521	Ehhadh	186.958	112.553	158.062	99.0163	38.5036	39.1342	93.2091	26.8041	28.5616	12.5548	protein_coding
XLOC_018524	Liph	1262.88	950.318	1564.64	1098.46	339.248	211.536	36.3516	42.688	18.089	17.3835	protein_coding
XLOC_018548	Masp1	8.24815	4.64136	6.21593	4.12568	2.08128	3.17304	63.3822	87.3616	60.9314	75.3287	protein_coding
XLOC_018564	Leprel1	0	0	7.10392	20.6284	35.3817	51.8264	355.127	258.114	247.534	114.925	protein_coding
XLOC_018601	Lrrc15	188.791	73.1014	18.6478	53.6338	31.2191	17.9806	17.7097	40.7025	4.76026	12.5548	protein_coding
XLOC_018616	Apod	54.9877	35.9705	5.32794	3.09426	0	1.05768	0	0	0	0.965752	protein_coding
XLOC_018632	Nrros	15.5798	12.7637	93.2389	69.1051	32.2598	15.8652	1.86418	1.98549	7.61642	6.76027	protein_coding
XLOC_018649	Kalrn	381.248	373.629	150.958	140.273	122.795	106.826	477.231	935.166	844.47	1525.89	protein_coding
XLOC_018660	Parp14	124.639	164.768	451.099	250.635	221.656	193.556	82.9561	47.6518	28.5616	24.1438	protein_coding
XLOC_018661	Dtx3l	196.123	147.363	469.746	578.626	448.515	487.591	124.9	103.245	68.5478	81.1232	protein_coding
XLOC_018697	Pla1a	624.11	372.469	149.182	88.7021	36.4223	43.3649	50.3329	19.8549	10.4726	4.82876	protein_coding
XLOC_018729	Wdr52	0.916462	0	0.88799	0	1.04064	1.05768	22.3702	35.7388	25.7054	20.2808	protein_coding
XLOC_018748	Tagln3	27.4938	27.8481	41.7355	60.8538	13.5283	14.8075	41.9441	35.7388	172.321	350.568	protein_coding
XLOC_018750	Phldb2	269.44	258.756	143.854	300.143	368.386	619.801	779.228	1034.44	1007.27	1265.14	protein_coding
XLOC_018760	Morc1	118.224	54.5359	26.6397	21.6598	2.08128	1.05768	0	0	0	0	protein_coding
XLOC_018782	Alcam	6.41523	4.64136	22.1997	52.6024	24.9753	81.4414	154.727	138.984	220.876	581.383	protein_coding
XLOC_018810	Col8a1	0	0	0	0	8.3251	1.05768	57.7897	12.9057	41.8903	5.79451	protein_coding
XLOC_018817	St3gal6	9.16462	11.6034	12.4319	21.6598	31.2191	61.3455	100.666	70.4849	98.0614	74.3629	protein_coding
XLOC_018910	Nrip1	378.499	488.503	404.923	380.594	454.759	357.496	1552.86	2010.31	1389.04	1388.75	protein_coding
XLOC_018943	App	297.85	472.258	234.429	465.17	797.129	852.491	3269.78	2213.82	2977.07	2393.13	protein_coding
XLOC_018945	Cyyr1	0	1.16034	109.223	207.315	211.25	226.344	37.2837	83.3906	35.2259	48.2876	protein_coding
XLOC_018947	Adamts1	5.49877	26.6878	67.4872	258.886	105.104	152.306	642.211	967.926	1279.56	1622.46	protein_coding
XLOC_018966	Cldn8	0	0	0.88799	0	2.08128	0	24.2344	20.8476	32.3698	27.0411	protein_coding
XLOC_018989	NA	18.3292	6.96204	79.9191	54.6652	41.6255	31.7304	9.32091	9.92745	2.85616	0.965752	lincRNA
XLOC_019044	Runx1	0	2.32068	6.21593	19.597	55.1538	68.7493	35.4195	18.8622	47.6026	42.4931	protein_coding
XLOC_019056	Dopey2	603.032	250.633	336.548	139.242	24.9753	40.1919	0.932091	0	4.76026	1.9315	protein_coding
XLOC_019080	Tmprss2	2.74938	10.4431	6.21593	19.597	109.267	291.92	895.74	490.416	573.136	288.76	protein_coding
XLOC_019268	Tiam2	230.032	84.7048	39.0715	53.6338	19.7721	338.458	79.2278	127.071	88.5409	193.15	protein_coding
XLOC_019313	Mpc1	311.597	315.612	101.231	62.9166	35.3817	31.7304	30.759	31.7678	45.6985	85.952	protein_coding
XLOC_019319	T	144.801	54.5359	7.99191	17.5341	21.8534	2526.8	3.72837	5.95647	3.80821	0.965752	protein_coding
XLOC_019333	NA	7.33169	6.96204	90.5749	110.362	22.894	21.1536	6.52464	3.97098	8.56847	5.79451	lincRNA
XLOC_019355	Sod2	4905.82	3637.66	2676.4	2134.01	706.593	858.837	720.507	734.631	740.697	714.657	protein_coding
XLOC_019373	Smoc2	0	0	2.66397	5.1571	10.4064	14.8075	66.1785	38.7171	125.671	95.6095	protein_coding
XLOC_019409	Lix1	5.49877	3.48102	11.5439	22.6912	26.016	25.3843	68.0427	105.231	109.486	136.171	protein_coding
XLOC_019506	Cldn6	64.1523	109.072	457.315	1530.63	1368.44	1898.54	1345.94	1126.77	984.422	641.26	protein_coding
XLOC_019523	Abca3	120.056	237.87	107.447	162.964	309.07	190.383	1151.13	796.181	791.156	634.499	protein_coding
XLOC_019528	Caskin1	10.9975	25.5275	11.5439	35.0683	61.3976	38.0765	87.6166	69.4921	154.232	131.342	protein_coding
XLOC_019543	Igfals	204.371	136.92	78.1431	26.8169	27.0566	41.2496	13.9814	4.96372	9.52052	5.79451	protein_coding
XLOC_019578	Tmem8	658.936	449.051	412.027	419.788	221.656	257.016	66.1785	64.5284	23.8013	24.1438	protein_coding
XLOC_019583	Rgs11	1.83292	1.16034	39.0715	34.0369	158.177	79.3261	34.4874	21.8404	25.7054	12.5548	protein_coding
XLOC_019602	Syngap1	29.3268	38.2912	51.5034	95.922	300.744	267.593	202.264	298.816	259.91	259.787	protein_coding
XLOC_019626	Scube3	174.128	176.372	188.254	310.457	181.071	208.363	1442.88	1074.15	1666.09	1220.71	protein_coding
XLOC_019628	Def6	365.668	459.494	364.964	303.237	105.104	99.422	47.5367	24.8186	25.7054	11.589	protein_coding
XLOC_019649	Cdkn1a	696.511	1060.55	205.126	278.483	215.412	116.345	103.462	96.2963	164.705	120.719	protein_coding
XLOC_019670	Dnah8	1283.05	917.828	410.251	128.927	334.045	270.766	132.357	25.8114	59.0272	9.65752	protein_coding
XLOC_019672	Glp1r	30.2432	54.5359	77.2551	71.168	92.6168	42.3072	16.7776	9.92745	3.80821	1.9315	protein_coding
XLOC_019694	Cyp4f39	68.7346	113.713	71.9272	29.9112	21.8534	7.40377	6.52464	0.992745	1.9041	0.965752	protein_coding
XLOC_019715	Kank3	929.292	469.937	556.769	360.997	330.923	181.921	128.629	63.5357	93.3011	58.9109	protein_coding
XLOC_019726	Col11a2	3.66585	1.16034	7.10392	14.4399	14.5689	13.7499	53.1292	80.4123	69.4998	74.3629	protein_coding
XLOC_019734	Psmb8	0	0	22.1997	45.3825	103.023	70.8646	22.3702	4.96372	6.66437	4.82876	protein_coding
XLOC_019771	Ly6g6e	352.838	300.528	51.5034	29.9112	15.6096	12.6922	5.59255	1.98549	0	0.965752	protein_coding
XLOC_019797	Pou5f1	14723	12039.7	14004.5	9899.57	5138.67	6439.16	247.936	206.491	64.7396	38.6301	protein_coding
XLOC_019803	2300002M23Rik	141.135	55.6963	1.77598	5.1571	1.04064	4.23072	0.932091	0	0	0	protein_coding
XLOC_019809	Ier3	35.742	23.2068	75.4791	88.7021	426.662	869.414	117.444	49.6372	187.554	124.582	protein_coding
XLOC_019857	Zfp57	2753.05	2821.94	2691.5	1136.62	425.621	413.553	180.826	285.911	305.609	310.972	protein_coding
XLOC_019865	Ubd	334.508	58.017	38.1836	44.351	3.12191	10.5768	0	0	1.9041	0.965752	protein_coding
XLOC_019937	Rcan2	10.0811	13.9241	2.66397	18.5656	28.0972	40.1919	86.6845	105.231	102.822	85.952	protein_coding
XLOC_019940	Clic5	0.916462	2.32068	4.43995	37.1311	96.7793	53.9417	79.2278	36.7316	36.178	23.1781	protein_coding
XLOC_019991	Pgc	254.776	129.958	48.8394	11.3456	6.24383	2.11536	5.59255	0.992745	4.76026	0	protein_coding
XLOC_019992	Tfeb	1258.3	710.128	697.072	345.526	58.2757	21.1536	61.518	23.8259	76.1642	23.1781	protein_coding
XLOC_020002	Treml2	65.0688	42.9325	99.4548	49.5081	42.6662	30.6727	5.59255	3.97098	4.76026	1.9315	protein_coding
XLOC_020034	St6gal2	4.58231	13.9241	25.7517	85.6078	67.6415	80.3838	80.1599	110.195	104.726	94.6437	protein_coding
XLOC_020064	1700061G19Rik	321.678	175.211	195.358	84.5764	21.8534	28.5574	6.52464	9.92745	1.9041	0.965752	protein_coding
XLOC_020122	Lama1	2038.21	2472.68	1624.13	782.848	1494.36	744.607	9717.98	4123.86	7585	3346.33	protein_coding
XLOC_020133	Gm20703	76.9828	78.9031	36.4076	25.7855	12.4877	10.5768	2.79627	1.98549	3.80821	0.965752	lincRNA
XLOC_020169	Rasgrp3	0.916462	1.16034	7.10392	25.7855	14.5689	35.9612	118.376	280.947	46.6506	130.377	protein_coding
XLOC_020176	Vit	0	0	0	0	0	0	84.8203	70.4849	111.39	123.616	protein_coding
XLOC_020180	1110001A16Rik	1093.34	992.09	589.625	443.51	157.136	188.267	203.196	142.955	211.356	167.075	protein_coding
XLOC_020183	Qpct	186.958	248.313	21.3117	33.0054	8.3251	13.7499	22.3702	16.8767	19.9931	24.1438	protein_coding
XLOC_020207	Tmem178	7.33169	4.64136	4.43995	4.12568	2.08128	5.2884	28.8948	21.8404	56.1711	84.0205	protein_coding
XLOC_020224	Pkdcc	10.0811	18.5654	71.9272	174.31	275.769	1271.33	846.339	754.486	497.923	858.554	protein_coding
XLOC_020254	Epas1	630.526	1158.02	2454.4	999.446	382.955	331.054	401.731	282.932	367.492	153.555	protein_coding
XLOC_020263	Epcam	352.838	548.84	3268.69	3499.61	2850.31	2705.55	958.19	807.102	857.799	576.554	protein_coding
XLOC_020271	Msh6	12862.5	13537.7	15803.6	11497.2	5771.38	5667.05	3240.88	2695.3	2548.64	2318.77	protein_coding
XLOC_020281	Ston1	3.66585	27.8481	25.7517	33.0054	90.5355	115.287	93.2091	118.137	112.342	107.199	protein_coding
XLOC_020364	Rsph3a	4.58231	15.0844	3.55196	4.12568	57.2351	37.0188	61.518	58.572	85.6847	65.6712	protein_coding
XLOC_020402	Pnldc1	185.125	146.203	276.165	155.744	98.8606	39.1342	29.8269	25.8114	19.041	22.2123	protein_coding
XLOC_020435	Thbs2	1.83292	2.32068	20.4238	17.5341	105.104	84.6145	89.4808	70.4849	54.267	42.4931	protein_coding
XLOC_020446	Dll1	7.33169	42.9325	140.302	172.247	155.055	139.614	235.819	234.288	392.246	534.061	protein_coding
XLOC_020543	Mmp25	0.916462	11.6034	82.583	378.531	430.824	401.919	13.9814	5.95647	3.80821	2.89726	protein_coding
XLOC_020611	Msln	121.889	78.9031	27.5277	10.3142	4.16255	3.17304	10.253	3.97098	15.2328	5.79451	protein_coding
XLOC_020613	Fam173a	501.304	417.722	512.37	432.165	302.826	361.727	2636.89	2881.94	3685.39	3642.82	protein_coding
XLOC_020617	Wfikkn1	3.66585	0	3.55196	3.09426	7.28447	10.5768	370.04	348.453	83.7806	46.3561	protein_coding
XLOC_020643	Necsulea_Locus_27721	180.543	148.523	6.21593	9.28278	3.12191	2.11536	0	0.992745	0	0	lincRNA
XLOC_020694	Gm17657	68.7346	63.8187	141.19	49.5081	24.9753	17.9806	10.253	10.9202	0.952052	4.82876	protein_coding
XLOC_020713	Rsph1	44.9066	35.9705	62.1593	74.2622	66.6008	84.6145	7.45673	4.96372	11.4246	10.6233	protein_coding
XLOC_020717	Cbs	792.739	782.069	552.33	518.804	286.175	351.15	99.7338	76.4414	74.2601	33.8013	protein_coding
XLOC_020723	Hsf2bp	1754.11	1233.44	1103.77	529.118	199.803	163.941	85.7524	43.6808	46.6506	32.8356	protein_coding
XLOC_020821	Apom	15.5798	19.7258	8.8799	7.21994	24.9753	5.2884	241.412	65.5212	56.1711	22.2123	protein_coding
XLOC_020977	Slc25a27	54.0712	53.3756	94.1269	90.7649	330.923	176.633	237.683	367.316	474.122	437.486	protein_coding
XLOC_020989	Spats1	65.0688	39.4515	18.6478	12.377	7.28447	0	2.79627	2.97823	1.9041	0	protein_coding
XLOC_020992	Slc29a1	1589.14	1532.81	3630.1	1745.16	821.063	808.068	329.96	278.961	221.828	209.568	protein_coding
XLOC_020993	Gm7325	319.845	226.266	726.375	187.718	55.1538	60.2878	6.52464	7.94196	2.85616	1.9315	protein_coding
XLOC_021002	Vegfa	765.245	768.145	244.197	137.179	649.358	671.627	1629.3	1438.49	2223.04	2345.81	protein_coding
XLOC_021015	Ttbk1	4.58231	2.32068	31.9676	105.205	119.673	40.1919	27.9627	23.8259	61.8834	84.0205	protein_coding
XLOC_021046	Frs3	42.1572	34.8102	39.9595	35.0683	11.447	5.2884	0	0.992745	0.952052	0	protein_coding
XLOC_021048	Mdfi	35.742	54.5359	160.726	134.085	135.283	164.998	301.066	219.397	440.8	366.02	protein_coding
XLOC_021053	Foxp4	169.545	177.532	235.317	173.279	385.036	419.899	804.395	1548.68	1243.38	1160.83	protein_coding
XLOC_021063	Apobec2	397.744	304.009	35.5196	46.4139	17.6908	82.4991	0.932091	5.95647	2.85616	0	protein_coding
XLOC_021072	Daam2	0	0	1.77598	1.03142	2.08128	13.7499	15.8456	31.7678	49.5067	77.2602	protein_coding
XLOC_021074	Dazl	449.983	762.343	289.485	80.4507	109.267	56.0571	227.43	96.2963	130.431	82.089	protein_coding
XLOC_021081	Satb1	28.4103	69.6204	118.103	224.85	394.402	377.592	444.608	632.379	574.088	518.609	protein_coding
XLOC_021127	Rfx2	305.182	475.739	344.54	272.295	203.965	122.691	57.7897	72.4704	67.5957	73.3972	protein_coding
XLOC_021140	Tubb4a	0	3.48102	16.8718	94.8906	146.73	188.267	34.4874	103.245	78.0683	95.6095	protein_coding
XLOC_021169	Efna5	19.2457	38.2912	36.4076	113.456	445.393	447.399	472.57	854.753	635.019	474.184	protein_coding
XLOC_021243	Emilin2	4.58231	20.8861	20.4238	40.2254	41.6255	48.6533	247.004	237.266	491.259	357.328	protein_coding
XLOC_021264	NA	17.4128	44.0929	46.1755	35.0683	201.884	97.3066	139.814	257.121	123.767	155.486	lincRNA
XLOC_021267	Nlrc4	12.8305	6.96204	67.4872	30.9426	13.5283	16.9229	0	0.992745	0.952052	0	protein_coding
XLOC_021300	Cyp1b1	0	1.16034	18.6478	95.922	58.2757	58.1725	535.953	378.236	511.252	333.185	protein_coding
XLOC_021325	Slc8a1	15.5798	39.4515	17.7598	31.974	79.0885	86.7298	316.911	366.323	325.602	296.486	protein_coding
XLOC_021347	Kcng3	5.49877	11.6034	19.5358	36.0997	200.843	121.633	16.7776	12.9057	28.5616	13.5205	protein_coding
XLOC_021390	Necsulea_Locus_27300|Guttman_lincRNA_3508	269.44	175.211	144.742	88.7021	52.0319	47.5956	2.79627	1.98549	2.85616	0.965752	lincRNA
XLOC_021507	Fzd8	139.302	128.798	87.023	187.718	222.697	850.375	985.221	724.704	648.348	525.369	protein_coding
XLOC_021526	NA	0	0	0	0	7.28447	8.46145	42.8762	124.093	45.6985	56.0136	lincRNA
XLOC_021527	Gata6	2.74938	6.96204	15.9838	9.28278	57.2351	573.263	532.224	557.923	387.485	399.821	protein_coding
XLOC_021538	Lama3	839.479	1002.53	485.73	315.614	181.071	137.499	22.3702	21.8404	8.56847	9.65752	protein_coding
XLOC_021557	Psma8	350.088	182.173	169.606	80.4507	38.5036	30.6727	13.0493	10.9202	4.76026	6.76027	protein_coding
XLOC_021594	Ttr	0	0	0	0	26.016	22.2113	325.3	144.941	66.6437	23.1781	protein_coding
XLOC_021596	Rnf125	598.449	438.608	689.968	457.95	132.161	108.941	64.3143	57.5792	28.5616	28.0068	protein_coding
XLOC_021621	Mocos	120.973	185.654	99.4548	100.048	78.0479	26.442	26.0986	4.96372	8.56847	1.9315	protein_coding
XLOC_021676	Wnt8a	0	0	54.1674	64.9794	97.82	320.477	16.7776	10.9202	11.4246	4.82876	protein_coding
XLOC_021684	Egr1	1.83292	5.8017	106.559	110.362	207.087	202.017	219.041	341.504	131.383	369.883	protein_coding
XLOC_021720	Slc4a9	4.58231	1.16034	10.6559	2.06284	1.04064	0	195.739	154.868	46.6506	27.0411	protein_coding
XLOC_021732	Pcdha2	1.83292	1.16034	2.66397	15.4713	36.4223	57.1148	14.9135	41.6953	65.6916	141.966	protein_coding
XLOC_021749	Pcdhb16	0	0	0.88799	0	0	1.05768	1.86418	8.9347	39.9862	53.1164	protein_coding
XLOC_021750	Pcdhb17	0	0	1.77598	1.03142	0	0	4.66046	12.9057	32.3698	78.2259	protein_coding
XLOC_021751	Pcdhb18	0	1.16034	3.55196	1.03142	0	1.05768	2.79627	10.9202	31.4177	53.1164	protein_coding
XLOC_021752	Pcdhb19	0	0	2.66397	5.1571	2.08128	3.17304	10.253	32.7606	92.3491	128.445	protein_coding
XLOC_021753	Pcdhb21	0.916462	1.16034	1.77598	4.12568	2.08128	3.17304	18.6418	42.688	40.9383	110.096	protein_coding
XLOC_021802	Stk32a	8.24815	3.48102	10.6559	28.8798	14.5689	54.9994	32.6232	46.659	68.5478	117.822	protein_coding
XLOC_021835	Arl14epl	453.648	375.95	124.319	167.09	24.9753	32.7881	14.9135	29.7823	6.66437	11.589	protein_coding
XLOC_021867	Prdm6	0.916462	4.64136	0	2.06284	8.3251	34.9035	33.5553	45.6663	35.2259	36.6986	protein_coding
XLOC_021901	Gramd3	4.58231	3.48102	182.038	221.755	165.461	198.844	152.863	110.195	149.472	141	protein_coding
XLOC_021910	Megf10	0	0	2.66397	12.377	8.3251	15.8652	43.8083	76.4414	241.821	440.383	protein_coding
XLOC_021925	Adamts19	7.33169	3.48102	65.7112	109.33	199.803	78.2684	259.121	230.317	430.328	409.479	protein_coding
XLOC_021943	Arsi	1.83292	6.96204	0.88799	3.09426	12.4877	44.4226	60.5859	22.8331	51.4108	15.452	protein_coding
XLOC_021947	Pdgfrb	7.33169	29.0085	32.8556	10.3142	27.0566	29.6151	132.357	178.694	122.815	353.465	protein_coding
XLOC_021978	St8sia3	0	0	4.43995	23.7227	61.3976	43.3649	55.9255	78.4269	40.9383	58.9109	protein_coding
XLOC_021981	Onecut2	10.0811	40.6119	3.55196	16.5027	32.2598	17.9806	197.603	454.677	752.121	774.533	protein_coding
XLOC_021998	Pmaip1	279.521	621.942	1314.22	1647.18	1642.13	1587.58	202.264	126.079	141.856	93.678	protein_coding
XLOC_022006	Impa2	1470.92	1155.7	991.884	774.596	493.262	349.035	179.894	145.934	167.561	137.137	protein_coding
XLOC_022053	Myo5b	29.3268	70.7807	42.6235	69.1051	142.567	98.3643	364.448	259.106	302.753	189.287	protein_coding
XLOC_022067	Zbtb7c	5.49877	4.64136	10.6559	9.28278	3.12191	3.17304	57.7897	36.7316	119.007	191.219	protein_coding
XLOC_022144	Zadh2	28.4103	38.2912	20.4238	14.4399	23.9347	39.1342	327.164	456.663	550.286	439.417	protein_coding
XLOC_022146	Fam69c	0.916462	1.16034	0.88799	5.1571	9.36574	5.2884	44.7404	20.8476	53.3149	24.1438	protein_coding
XLOC_022149	Fbxo15	4208.39	3795.47	1465.18	1204.7	269.525	226.344	192.011	82.3978	96.1573	50.2191	protein_coding
XLOC_022249	Zfp521	105.393	60.3376	21.3117	58.7909	165.461	254.901	733.556	1122.79	696.902	834.41	protein_coding
XLOC_022261	Kctd1	65.0688	75.422	80.807	24.7541	17.6908	26.442	159.388	190.607	230.397	242.404	protein_coding
XLOC_022275	Cdh2	98.9778	33.6498	47.9514	96.9535	117.592	1434.22	1271.37	1894.16	1445.22	1829.13	protein_coding
XLOC_022302	Klhl14	0	0	2.66397	15.4713	247.672	76.153	139.814	182.665	120.911	83.0547	protein_coding
XLOC_022324	Slc39a6	187.875	218.144	175.822	183.593	259.119	197.786	630.094	881.558	922.539	1229.4	protein_coding
XLOC_022369	Nrep	161.297	169.41	78.1431	85.6078	129.039	544.706	745.673	1014.59	1458.54	3568.46	protein_coding
XLOC_022416	Dnd1	102.644	114.874	158.062	130.99	79.0885	78.2684	55.9255	17.8694	18.089	9.65752	protein_coding
XLOC_022434	Necsulea_CUFF.150354	0.916462	2.32068	2.66397	2.06284	81.1698	39.1342	32.6232	32.7606	30.4657	13.5205	lincRNA
XLOC_022438	Pcdh1	3.66585	19.7258	118.103	519.836	1085.39	768.934	586.285	346.468	308.465	183.493	protein_coding
XLOC_022442	Pcdh12	0	0	0	1.03142	1.04064	0	8.38882	18.8622	13.3287	58.9109	protein_coding
XLOC_022443	Gnpda1	1342.62	1093.04	1455.41	921.058	781.519	865.183	352.331	242.23	176.13	187.356	protein_coding
XLOC_022444	Spry4	0	1.16034	1969.56	775.628	630.627	518.264	28.8948	54.601	17.1369	34.7671	protein_coding
XLOC_022462	Ppp2r2b	0.916462	0	2.66397	4.12568	6.24383	7.40377	54.0613	61.5502	53.3149	79.1917	protein_coding
XLOC_022465	Dpysl3	294.184	279.642	368.516	260.949	168.583	324.708	1566.85	1782.97	2570.54	3010.25	protein_coding
XLOC_022467	Jakmip2	0	0	19.5358	119.645	173.787	93.0759	27.0306	51.6227	56.1711	165.144	protein_coding
XLOC_022473	Mcc	118.224	87.0254	27.5277	69.1051	86.373	490.764	260.986	255.135	277.999	221.157	protein_coding
XLOC_022488	Cdo1	653.437	533.756	76.3671	99.0163	37.463	43.3649	58.7218	35.7388	34.2739	51.1849	protein_coding
XLOC_022492	Sema6a	10.9975	22.0464	241.533	1075.77	3079.25	2591.32	555.526	730.66	466.506	486.739	protein_coding
XLOC_022519	Zfp608	2.74938	2.32068	155.398	540.464	1124.93	1021.72	910.653	1319.36	856.847	939.677	protein_coding
XLOC_022544	Fbn2	41.2408	132.279	38.1836	84.5764	65.5602	161.825	2363.78	2872.01	3298.86	2811.31	protein_coding
XLOC_022557	Synpo	4.58231	9.28271	1.77598	8.25136	8.3251	27.4997	109.987	107.216	129.479	131.342	protein_coding
XLOC_022577	Slc6a7	147.55	129.958	22.1997	4.12568	10.4064	3.17304	3.72837	3.97098	1.9041	1.9315	protein_coding
XLOC_022619	Grp	6.41523	3.48102	41.7355	45.3825	22.894	22.2113	0.932091	0.992745	0	0.965752	protein_coding
XLOC_022660	Rab27b	0	0	0	0	0	1.05768	33.5553	43.6808	53.3149	51.1849	protein_coding
XLOC_022669	Dcc	0.916462	0	0.88799	0	1.04064	0	238.615	301.794	593.129	854.691	protein_coding
XLOC_022710	Rnf165	26.5774	51.0549	109.223	79.4193	158.177	149.133	274.967	496.372	462.697	353.465	protein_coding
XLOC_022718	Setbp1	44.9066	39.4515	47.0634	215.567	580.676	361.727	400.799	883.543	1021.55	1113.51	protein_coding
XLOC_022735	Sall3	183.292	175.211	27.5277	17.5341	14.5689	90.9606	46.6046	114.166	90.445	125.548	protein_coding
XLOC_022768	Tshz1	28.4103	15.0844	10.6559	18.5656	11.447	14.8075	1774.7	2523.56	2545.79	3365.65	protein_coding
XLOC_022802	Cpt1a	1878.75	2471.52	531.906	228.975	212.29	121.633	32.6232	47.6518	50.4588	153.555	protein_coding
XLOC_022820	Pitpnm1	16.4963	34.8102	79.0311	133.053	242.469	270.766	192.011	211.455	169.465	175.767	protein_coding
XLOC_022848	Cd248	6.41523	6.96204	1.77598	0	8.3251	4.23072	15.8456	54.601	19.9931	129.411	protein_coding
XLOC_022870	Ltbp3	6.41523	13.9241	24.8637	19.597	107.186	62.4032	142.61	116.151	144.712	155.486	protein_coding
XLOC_022922	Pla2g16	207.12	218.144	191.806	146.462	109.267	93.0759	57.7897	26.8041	22.8493	15.452	protein_coding
XLOC_023053	Prune2	105.393	116.034	433.339	235.164	300.744	214.709	66.1785	77.4341	57.1231	43.4589	protein_coding
XLOC_023077	Aldh1a1	0	0	0	2.06284	1.04064	0	295.473	206.491	459.841	191.219	protein_coding
XLOC_023106	Apba1	1.83292	2.32068	11.5439	6.18852	1.04064	2.11536	42.8762	13.8984	37.13	50.2191	protein_coding
XLOC_023115	Dmrt1	89.8132	179.853	643.792	400.191	324.679	134.325	315.979	123.1	80.9245	31.8698	protein_coding
XLOC_023135	Slc1a1	65.9852	92.8271	15.9838	17.5341	5.20319	1.05768	6.52464	12.9057	8.56847	9.65752	protein_coding
XLOC_023143	Jak2	242.862	252.954	111.887	128.927	279.932	326.823	1647.94	1639.02	1159.6	866.28	protein_coding
XLOC_023221	Cyp26a1	1.83292	2.32068	3.55196	7.21994	94.6981	1056.62	4158.99	2006.34	3936.74	3396.55	protein_coding
XLOC_023290	Abcc2	9.16462	11.6034	1.77598	3.09426	62.4383	31.7304	193.875	50.63	37.13	7.72602	protein_coding
XLOC_023341	Ina	44.9066	20.8861	483.954	438.353	323.638	242.209	34.4874	60.5574	311.321	468.39	protein_coding
XLOC_023355	Sorcs3	0	0	0.88799	0	4.16255	3.17304	13.9814	9.92745	63.7875	51.1849	protein_coding
XLOC_023371	NA	1.83292	2.32068	1.77598	3.09426	15.6096	5.2884	41.9441	56.5865	21.8972	38.6301	lincRNA
XLOC_023375	4833407H14Rik	43.9902	27.8481	71.9272	41.2568	15.6096	17.9806	3.72837	0.992745	0.952052	0	lincRNA
XLOC_023377	Dusp5	44.9066	47.5739	162.502	194.938	181.071	203.075	560.187	620.466	447.465	441.349	protein_coding
XLOC_023392	NA	0.916462	1.16034	0	0	6.24383	8.46145	13.9814	40.7025	30.4657	34.7671	lincRNA
XLOC_023398	Tcf7l2	30.2432	55.6963	48.8394	70.1365	95.7387	252.786	207.856	310.729	240.869	267.513	protein_coding
XLOC_023415	Tdrd1	5.49877	5.8017	68.3752	93.8592	59.3164	26.442	17.7097	8.9347	9.52052	3.86301	protein_coding
XLOC_023416	Vwa2	0.916462	2.32068	85.247	147.493	160.258	87.7875	85.7524	108.209	84.7327	61.8082	protein_coding
XLOC_023433	Slc18a2	0	0	1.77598	6.18852	18.7315	10.5768	25.1665	37.7243	142.808	141.966	protein_coding
XLOC_023438	Emx2	0	0	1.77598	1.03142	0	2.11536	9.32091	15.8839	44.7465	38.6301	protein_coding
XLOC_023498	Actn3	30.2432	29.0085	285.933	243.415	151.933	175.575	54.0613	37.7243	19.9931	6.76027	protein_coding
XLOC_023516	Gal3st3	32.0762	62.6583	99.4548	18.5656	17.6908	5.2884	5.59255	2.97823	6.66437	0	protein_coding
XLOC_023549	Capn1	957.702	960.761	423.571	363.06	190.437	264.42	199.468	130.05	153.28	120.719	protein_coding
XLOC_023580	Flrt1	3.66585	19.7258	10.6559	11.3456	36.4223	20.0959	57.7897	69.4921	140.904	133.274	protein_coding
XLOC_023591	Lgals12	71.484	33.6498	12.4319	9.28278	8.3251	4.23072	0	3.97098	0	0.965752	protein_coding
XLOC_023608	Gng3	21.9951	16.2447	93.2389	144.399	99.9013	84.6145	15.8456	13.8984	16.1849	25.1096	protein_coding
XLOC_023625	Fads3	14.6634	9.28271	7.10392	12.377	47.8694	25.3843	111.851	150.897	64.7396	74.3629	protein_coding
XLOC_023630	Myrf	1.83292	23.2068	398.707	360.997	1028.15	514.033	298.269	397.098	652.156	526.335	protein_coding
XLOC_023640	Pga5	14.6634	18.5654	13.3198	7.21994	66.6008	138.556	54.9934	19.8549	6.66437	5.79451	protein_coding
XLOC_023644	Tmem132a	184.209	259.916	418.243	657.014	696.187	1051.33	1565.91	1701.56	1481.39	1505.61	protein_coding
XLOC_023690	Dtx4	57.7371	87.0254	77.2551	238.258	226.859	141.729	975.9	1408.71	2619.1	3574.25	protein_coding
XLOC_023737	Pcsk5	27.4938	33.6498	6.21593	5.1571	4.16255	23.269	61.518	50.63	96.1573	112.993	protein_coding
XLOC_023742	Ostf1	3279.1	2530.7	838.262	939.623	455.799	410.38	210.653	151.89	158.041	131.342	protein_coding
XLOC_023743	Rorb	0	0	0	0	3.12191	4.23072	15.8456	40.7025	95.2052	174.801	protein_coding
XLOC_023752	Aldh1a7	0	0	0	2.06284	2.08128	1.05768	236.751	146.926	199.931	38.6301	protein_coding
XLOC_023850	Gldc	2731.06	2991.35	6673.24	5504.69	3948.18	3749.48	1441.95	1097.98	784.491	705.965	protein_coding
XLOC_023854	Dkk1	0.916462	1.16034	1.77598	3.09426	14.5689	211.536	49.4008	14.8912	10.4726	2.89726	protein_coding
XLOC_023855	Prkg1	6.41523	5.8017	5.32794	14.4399	32.2598	22.2113	167.776	322.642	158.993	217.294	protein_coding
XLOC_023883	Acta2	1.83292	0	3.55196	14.4399	47.8694	32.7881	66.1785	88.3543	51.4108	153.555	protein_coding
XLOC_023887	Lipa	57.7371	105.591	77.2551	103.142	176.908	214.709	670.174	437.801	490.307	381.472	protein_coding
XLOC_023891	Slc16a12	6.41523	0	2.66397	7.21994	9.36574	27.4997	139.814	159.832	218.972	170.938	protein_coding
XLOC_023908	Ppp1r3c	17.4128	34.8102	12.4319	8.25136	121.755	482.303	79.2278	62.5429	219.924	341.876	protein_coding
XLOC_023914	Fgfbp3	6.41523	10.4431	9.76789	19.597	17.6908	27.4997	158.456	262.085	596.937	541.787	protein_coding
XLOC_023923	NA	33.9091	89.3461	86.135	73.2308	578.595	232.69	124.9	190.607	114.246	93.678	lincRNA
XLOC_023929	Myof	449.983	778.588	79.9191	106.236	94.6981	153.364	506.126	415.96	540.766	481.91	protein_coding
XLOC_023931	Rbp4	0	3.48102	7.10392	19.597	19.7721	6.34609	673.902	172.738	237.061	47.3219	protein_coding
XLOC_023934	Necsulea_Locus_74461	251.11	172.891	98.5668	93.8592	58.2757	47.5956	7.45673	14.8912	1.9041	2.89726	lincRNA
XLOC_023957	Blnk	83.398	66.1393	41.7355	11.3456	12.4877	14.8075	3.72837	0.992745	4.76026	0.965752	protein_coding
XLOC_023965	Slit1	27.4938	30.1688	11.5439	11.3456	23.9347	193.556	196.671	152.883	119.007	109.13	protein_coding
XLOC_023973	Avpi1	1063.1	747.258	676.648	551.81	188.355	148.075	199.468	108.209	136.143	86.9177	protein_coding
XLOC_023974	Sfrp5	0.916462	3.48102	4.43995	2.06284	23.9347	49.711	424.102	255.135	40.9383	25.1096	protein_coding
XLOC_024004	Scd1	5374.13	8137.46	708.616	901.461	1659.82	1856.23	2220.24	1916	1950.76	1401.31	protein_coding
XLOC_024015	Lbx1	3.66585	2.32068	7.10392	3.09426	0	0	6.52464	3.97098	32.3698	71.4657	protein_coding
XLOC_024026	Fgf8	0.916462	1.16034	0.88799	5.1571	48.91	792.203	0.932091	0.992745	1.9041	0	protein_coding
XLOC_024109	Ablim1	532.464	458.334	79.9191	84.5764	118.633	455.86	542.477	695.914	299.897	233.712	protein_coding
XLOC_024171	Fam171a1	97.1449	104.431	79.9191	175.341	147.771	285.574	568.576	703.856	488.403	535.993	protein_coding
XLOC_024188	Phyh	1051.18	869.094	257.517	193.907	152.974	314.131	200.4	141.963	136.143	130.377	protein_coding
XLOC_024216	Itih5	1.83292	4.64136	7.99191	35.0683	68.6821	46.538	177.097	99.2745	111.39	73.3972	protein_coding
XLOC_024356	Vim	2002.47	736.815	1197.01	1002.54	387.117	1111.62	1358.99	1708.51	3692.06	4288.91	protein_coding
XLOC_024383	NA	87.0638	60.3376	54.1674	20.6284	29.1379	12.6922	1.86418	2.97823	0	0	lincRNA
XLOC_024399	Msrb2	186.958	68.46	71.9272	78.3879	19.7721	26.442	10.253	13.8984	17.1369	32.8356	protein_coding
XLOC_024448	Psd4	154.882	67.2997	144.742	160.901	85.3323	49.711	40.0799	31.7678	22.8493	6.76027	protein_coding
XLOC_024460	Nrarp	65.9852	60.3376	39.9595	70.1365	85.3323	171.344	168.709	146.926	378.917	521.506	protein_coding
XLOC_024505	Gpsm1	91.6462	93.9875	143.854	275.389	251.834	305.67	604.927	735.624	671.197	765.842	protein_coding
XLOC_024519	Cacfd1	40.3243	77.7427	32.8556	68.0737	137.364	169.229	196.671	292.86	298.944	351.534	protein_coding
XLOC_024523	Adamtsl2	0	0	0	0	0	2.11536	2.79627	13.8984	49.5067	29.9383	protein_coding
XLOC_024532	Col5a1	141.135	171.73	104.783	179.467	234.144	389.227	622.637	967.926	499.828	752.321	protein_coding
XLOC_024540	Gbgt1	190.624	114.874	43.5115	29.9112	21.8534	13.7499	13.9814	18.8622	4.76026	4.82876	protein_coding
XLOC_024609	Prrx2	3.66585	5.8017	15.0958	8.25136	27.0566	24.3267	140.746	139.977	43.7944	75.3287	protein_coding
XLOC_024615	Ass1	6369.41	5288.83	6917.44	3186.06	700.349	762.588	741.945	253.15	256.102	136.171	protein_coding
XLOC_024620	Prdm12	0	1.16034	0	0	0	0	22.3702	27.7969	59.9793	75.3287	protein_coding
XLOC_024627	Aif1l	43.9902	63.8187	198.91	434.228	253.916	282.401	657.124	719.74	441.752	595.869	protein_coding
XLOC_024650	Ak1	1232.64	1181.23	832.046	861.235	176.908	286.632	225.566	206.491	277.999	244.335	protein_coding
XLOC_024662	Angptl2	10.9975	25.5275	8.8799	9.28278	60.357	66.6339	171.505	213.44	232.301	251.096	protein_coding
XLOC_024685	Gsn	60.4865	63.8187	72.8151	167.09	231.022	320.477	603.995	194.578	405.574	282	protein_coding
XLOC_024732	Crb2	18.3292	13.9241	15.0958	33.0054	122.795	137.499	1056.99	1116.84	1337.63	1027.56	protein_coding
XLOC_024763	Kynu	0	0	9.76789	27.8483	13.5283	0	108.123	56.5865	32.3698	17.3835	protein_coding
XLOC_024941	Nostrin	0.916462	2.32068	0.88799	0	26.016	24.3267	123.968	43.6808	51.4108	15.452	protein_coding
XLOC_024950	Klhl23	57.7371	100.95	219.333	359.965	272.647	367.015	630.094	641.313	680.717	787.088	protein_coding
XLOC_024956	Sp5	307.931	40.6119	5.32794	1.03142	3.12191	277.112	125.832	181.672	72.356	75.3287	protein_coding
XLOC_024979	Pdk1	692.845	440.929	6204.38	3836.88	3952.34	2759.49	2093.48	1484.15	1981.22	1668.82	protein_coding
XLOC_025024	Hoxd8	15.5798	23.2068	0	3.09426	6.24383	1.05768	20.506	13.8984	51.4108	91.7465	protein_coding
XLOC_025029	Hoxd1	1.83292	3.48102	6.21593	7.21994	6.24383	21.1536	52.1971	43.6808	137.096	98.5067	protein_coding
XLOC_025067	Itga4	0	1.16034	10.6559	35.0683	24.9753	17.9806	21.4381	27.7969	110.438	110.096	protein_coding
XLOC_025114	Fam171b	7.33169	18.5654	214.893	220.724	420.418	299.324	319.707	334.555	295.136	342.842	protein_coding
XLOC_025130	Ube2l6	217.201	167.089	161.614	102.111	18.7315	26.442	28.8948	20.8476	36.178	37.6643	protein_coding
XLOC_025141	Aplnr	1.83292	0	0	3.09426	4.16255	481.245	15.8456	80.4123	9.52052	60.8424	protein_coding
XLOC_025261	Rapsn	180.543	106.751	32.8556	18.5656	5.20319	4.23072	3.72837	5.95647	2.85616	0	protein_coding
XLOC_025265	Mybpc3	61.4029	19.7258	7.99191	4.12568	1.04064	1.05768	44.7404	56.5865	31.4177	30.9041	protein_coding
XLOC_025270	Lrp4	142.968	211.182	237.093	267.138	790.885	676.916	1865.11	1532.8	1446.17	1016.94	protein_coding
XLOC_025279	Chrm4	20.1622	27.8481	43.5115	40.2254	33.3004	50.7687	137.95	160.825	270.383	281.034	protein_coding
XLOC_025293	Chst1	0	5.8017	34.6316	45.3825	148.811	49.711	20.506	12.9057	26.6575	47.3219	protein_coding
XLOC_025295	Syt13	2.74938	11.6034	39.9595	141.305	118.633	120.576	15.8456	10.9202	10.4726	23.1781	protein_coding
XLOC_025302	Alx4	0	0	0	0	0	0	18.6418	49.6372	43.7944	162.246	protein_coding
XLOC_025337	Slc1a2	0	1.16034	0	3.09426	17.6908	9.51913	72.7031	93.318	287.52	489.636	protein_coding
XLOC_025375	Wt1	1.83292	1.16034	78.1431	60.8538	67.6415	23.269	173.369	184.651	337.979	489.636	protein_coding
XLOC_025482	Thbs1	0.916462	1.16034	43.5115	478.579	668.09	408.265	279.627	292.86	658.82	442.315	protein_coding
XLOC_025510	Dll4	0	0	2.66397	2.06284	8.3251	6.34609	13.9814	26.8041	22.8493	73.3972	protein_coding
XLOC_025519	Itpka	625.027	411.92	124.319	71.168	15.6096	16.9229	27.0306	16.8767	19.9931	10.6233	protein_coding
XLOC_025572	Sema6d	0	2.32068	0.88799	6.18852	21.8534	287.689	145.406	145.934	170.417	249.164	protein_coding
XLOC_025585	Eid1	128.305	118.355	228.213	188.75	243.509	606.051	601.199	694.921	845.423	1446.7	protein_coding
XLOC_025590	Slc27a2	90.7297	80.0634	398.707	971.597	300.744	250.67	32.6232	23.8259	12.3767	8.69177	protein_coding
XLOC_025607	Gpat2	134.72	245.992	48.8394	14.4399	103.023	11.6345	38.2157	9.92745	29.5136	5.79451	protein_coding
XLOC_025627	Zc3h6	71.484	218.144	34.6316	23.7227	249.753	159.71	223.702	153.875	286.568	231.781	protein_coding
XLOC_025632	Slc20a1	4405.43	3911.5	9137.41	7205.5	2680.68	2832.47	859.388	973.883	754.978	1010.18	protein_coding
XLOC_025642	Tgm3	46.7395	42.9325	69.2632	24.7541	4.16255	58.1725	1.86418	0	1.9041	3.86301	protein_coding
XLOC_025694	Chgb	1.83292	1.16034	0.88799	0	1.04064	1.05768	2.79627	5.95647	67.5957	86.9177	protein_coding
XLOC_025705	Bmp2	2.74938	6.96204	1.77598	4.12568	22.894	156.537	120.24	146.926	98.0614	33.8013	protein_coding
XLOC_025716	Snap25	1.83292	1.16034	8.8799	7.21994	20.8128	23.269	3.72837	6.94921	67.5957	107.199	protein_coding
XLOC_025727	Ism1	3.66585	1.16034	4.43995	5.1571	14.5689	21.1536	60.5859	59.5647	32.3698	47.3219	protein_coding
XLOC_025750	Pcsk2	0	0	0	10.3142	37.463	63.4609	1.86418	4.96372	19.041	23.1781	protein_coding
XLOC_025795	Insm1	2.74938	2.32068	53.2794	69.1051	13.5283	29.6151	29.8269	29.7823	110.438	252.061	protein_coding
XLOC_025865	Scrt2	2.74938	0	0.88799	1.03142	4.16255	2.11536	0	8.9347	47.6026	94.6437	protein_coding
XLOC_025888	Id1	84.3145	60.3376	1316	723.025	210.209	549.994	647.804	466.59	654.06	567.862	protein_coding
XLOC_025897	Xkr7	6.41523	11.6034	10.6559	23.7227	41.6255	34.9035	34.4874	49.6372	133.287	119.753	protein_coding
XLOC_025909	Dnmt3b	786.324	527.954	13063.2	20302.5	17153.9	17951	845.407	772.356	376.061	271.376	protein_coding
XLOC_025974	Myl9	0	0	52.3914	223.818	92.6168	119.518	167.776	95.3035	219.924	175.767	protein_coding
XLOC_025989	Nnat	1.83292	1.16034	94.1269	208.347	126.958	400.861	242.344	509.278	504.588	1418.69	protein_coding
XLOC_026047	Sgk2	8.24815	2.32068	95.9029	35.0683	3.12191	8.46145	0	2.97823	0.952052	0.965752	protein_coding
XLOC_026053	Tox2	0	0	3.55196	3.09426	3.12191	5.2884	9.32091	23.8259	72.356	75.3287	protein_coding
XLOC_026054	Gdap1l1	0	2.32068	13.3198	39.194	68.6821	47.5956	27.9627	26.8041	61.8834	96.5752	protein_coding
XLOC_026092	Zswim1	592.034	670.676	661.552	420.819	269.525	222.113	115.579	94.3108	82.8286	77.2602	protein_coding
XLOC_026100	Slc12a5	9.16462	12.7637	7.99191	7.21994	19.7721	14.8075	25.1665	44.6735	68.5478	142.931	protein_coding
XLOC_026168	Tshz2	0	0	0.88799	2.06284	0	1.05768	17.7097	126.079	99.0134	225.986	protein_coding
XLOC_026173	Dok5	9.16462	2.32068	8.8799	4.12568	16.6502	14.8075	79.2278	44.6735	88.5409	73.3972	protein_coding
XLOC_026195	Cass4	14.6634	13.9241	150.07	73.2308	29.1379	20.0959	0	0	0	0	protein_coding
XLOC_026198	Tfap2c	1341.7	1014.14	557.657	768.408	276.81	181.921	219.041	136.999	94.2532	57.9451	protein_coding
XLOC_026223	Gnas	1039.27	1265.93	1319.55	1861.71	3745.26	4820.91	5274.71	6045.82	5619.01	5513.48	protein_coding
XLOC_026279	Phactr3	4.58231	6.96204	72.8151	90.7649	70.7634	38.0765	4.66046	4.96372	11.4246	28.9726	protein_coding
XLOC_026289	4930591A17Rik	75.1498	32.4895	41.7355	31.974	7.28447	2.11536	1.86418	0.992745	0.952052	0	lincRNA
XLOC_026311	Slc17a9	369.334	275	184.702	154.713	105.104	92.0182	12.1172	17.8694	12.3767	13.5205	protein_coding
XLOC_026364	Optn	1041.1	466.456	295.701	185.656	398.564	326.823	134.221	84.3833	108.534	79.1917	protein_coding
XLOC_026366	Camk1d	499.472	575.528	246.861	190.813	66.6008	161.825	24.2344	34.7461	31.4177	31.8698	protein_coding
XLOC_026393	Gata3	0	1.16034	0	5.1571	5.20319	17.9806	64.3143	87.3616	68.5478	35.7328	protein_coding
XLOC_026400	Guttman_lincRNA_465	149.383	186.815	64.8232	57.7595	121.755	38.0765	39.1478	13.8984	18.089	4.82876	lincRNA
XLOC_026427	Cubn	3.66585	2.32068	39.0715	35.0683	3262.4	1452.2	8699.21	2416.34	2418.21	441.349	protein_coding
XLOC_026448	Nebl	1.83292	3.48102	5.32794	12.377	21.8534	21.1536	106.258	115.158	67.5957	75.3287	protein_coding
XLOC_026502	Cacna1b	6.41523	16.2447	172.27	197.001	522.4	240.094	51.265	45.6663	84.7327	140.034	protein_coding
XLOC_026522	Grin1	12.8305	29.0085	7.10392	3.09426	92.6168	115.287	34.4874	30.7751	13.3287	17.3835	protein_coding
XLOC_026611	Urm1	2.74938	1.16034	0	0	1.04064	1.05768	41.9441	32.7606	178.034	102.37	protein_coding
XLOC_026620	Ccbl1	626.86	433.967	168.718	139.242	59.3164	76.153	87.6166	69.4921	75.2121	89.815	protein_coding
XLOC_026637	NA	4.58231	0	0.88799	1.03142	2.08128	1.05768	22.3702	34.7461	44.7465	18.3493	lincRNA
XLOC_026641	Ptges	109.059	152.004	35.5196	39.194	21.8534	30.6727	688.816	491.409	246.582	167.075	protein_coding
XLOC_026670	Stxbp1	63.2358	69.6204	82.583	62.9166	253.916	211.536	228.362	343.49	679.765	785.157	protein_coding
XLOC_026685	Mvb12b	113.641	189.135	40.8475	73.2308	254.956	284.516	420.373	388.163	436.04	517.643	protein_coding
XLOC_026699	Phf19	103.56	113.713	333.884	398.128	119.673	77.2107	112.783	96.2963	33.3218	20.2808	protein_coding
XLOC_026862	Ly75	2160.1	2935.66	292.149	258.886	406.889	436.822	889.215	635.357	544.574	250.13	protein_coding
XLOC_026887	NA	7.33169	9.28271	41.7355	39.194	42.6662	13.7499	0	0	0	0	lincRNA
XLOC_026895	Cobll1	6.41523	18.5654	28.4157	41.2568	109.267	216.825	147.27	113.173	100.918	40.5616	protein_coding
XLOC_026901	Scn3a	60.4865	46.4136	62.1593	17.5341	15.6096	3.17304	2.79627	18.8622	122.815	238.541	protein_coding
XLOC_026903	Galnt3	13.7469	44.0929	86.135	200.095	261.2	226.344	90.4129	93.318	99.0134	99.4725	protein_coding
XLOC_026922	Lrp2	89.8132	147.363	902.197	4827.04	10587.5	6182.15	6355.93	2056.97	2669.55	865.314	protein_coding
XLOC_027004	Ttn	1428.76	1262.45	1621.47	1521.34	709.715	1038.64	23.3023	80.4123	8.56847	26.0753	protein_coding
XLOC_027025	Neurod1	6.41523	12.7637	71.9272	59.8223	6.24383	1.05768	11.1851	19.8549	91.397	116.856	protein_coding
XLOC_027027	Frzb	0	0	1.77598	0	11.447	277.112	248.868	85.3761	215.164	167.075	protein_coding
XLOC_027056	Calcrl	1.83292	2.32068	11.5439	28.8798	10.4064	10.5768	42.8762	89.347	70.4519	134.24	protein_coding
XLOC_027071	Smtnl1	551.71	169.41	202.462	292.923	15.6096	45.4803	3.72837	4.96372	3.80821	0.965752	protein_coding
XLOC_027294	F2	53.1548	34.8102	19.5358	23.7227	18.7315	10.5768	265.646	28.7896	131.383	17.3835	protein_coding
XLOC_027299	Mdk	1014.52	900.423	1214.77	1113.93	1262.29	1410.95	9073.91	7372.12	5940.81	5268.18	protein_coding
XLOC_027317	Tspan18	3.66585	18.5654	9.76789	8.25136	56.1945	50.7687	138.882	190.607	257.054	253.027	protein_coding
XLOC_027325	Accsl	397.744	96.3082	50.6154	13.4085	3.12191	2.11536	0	0.992745	0	0	protein_coding
XLOC_027363	Prr5l	8.24815	10.4431	47.9514	62.9166	118.633	119.518	179.894	94.3108	105.678	103.336	protein_coding
XLOC_027373	Cd44	3.66585	1.16034	11.5439	26.8169	34.3411	68.7493	85.7524	37.7243	65.6916	55.0479	protein_coding
XLOC_027398	Depdc7	327.177	252.954	312.572	241.352	94.6981	76.153	93.2091	47.6518	39.9862	40.5616	protein_coding
XLOC_027400	Prrg4	495.806	780.908	1460.74	2292.85	1410.06	1047.1	253.529	192.593	171.369	102.37	protein_coding
XLOC_027497	Grem1	0	1.16034	3.55196	2.06284	1.04064	2.11536	41.9441	56.5865	19.041	20.2808	protein_coding
XLOC_027519	NA	0	0	0	0	0	0	58.7218	107.216	38.0821	47.3219	lincRNA
XLOC_027553	Ppp1r14d	156.715	120.675	15.0958	16.5027	18.7315	16.9229	9.32091	12.9057	4.76026	10.6233	protein_coding
XLOC_027572	Pla2g4e	77.8992	30.1688	23.0877	19.597	6.24383	3.17304	4.66046	1.98549	0	0	protein_coding
XLOC_027606	Patl2	242.862	147.363	118.991	68.0737	47.8694	24.3267	13.0493	3.97098	5.71231	3.86301	protein_coding
XLOC_027624	Fbn1	28.4103	67.2997	118.103	176.373	112.389	103.653	624.501	717.755	635.019	765.842	protein_coding
XLOC_027627	Shc4	0	0	13.3198	33.0054	68.6821	112.114	8.38882	8.9347	14.2808	13.5205	protein_coding
XLOC_027651	Prom2	0	1.16034	52.3914	27.8483	69.7228	20.0959	8.38882	12.9057	29.5136	24.1438	protein_coding
XLOC_027654	Mal	274.022	307.49	0.88799	4.12568	7.28447	9.51913	20.506	24.8186	27.6095	16.4178	protein_coding
XLOC_027705	Slc4a11	132.887	148.523	200.686	146.462	114.47	72.98	16.7776	24.8186	6.66437	9.65752	protein_coding
XLOC_027737	Fermt1	2.74938	3.48102	94.1269	308.395	118.633	115.287	131.425	91.3325	91.397	55.0479	protein_coding
XLOC_027776	Flrt3	348.255	242.511	117.215	186.687	212.29	621.916	1468.98	1099.96	714.039	584.28	protein_coding
XLOC_027828	NA	0	0	0	0	4.16255	67.6916	17.7097	88.3543	34.2739	46.3561	lincRNA
XLOC_027830	Foxa2	0.916462	1.16034	1.77598	0	23.9347	1055.57	255.393	260.099	214.212	152.589	protein_coding
XLOC_027834	Cd93	0	0	0.88799	1.03142	2.08128	17.9806	13.0493	75.4486	21.8972	200.876	protein_coding
XLOC_027865	Acss1	1052.1	883.018	560.321	356.871	174.827	179.806	37.2837	20.8476	42.8424	32.8356	protein_coding
XLOC_027881	Snph	0.916462	3.48102	23.0877	30.9426	233.103	154.421	36.3516	46.659	22.8493	32.8356	protein_coding
XLOC_027899	Trib3	793.656	458.334	410.251	230.007	170.665	113.172	68.9748	71.4776	65.6916	99.4725	protein_coding
XLOC_027922	Plagl2	51.3218	64.979	71.0392	69.1051	191.477	191.44	397.071	644.291	509.348	432.657	protein_coding
XLOC_027924	8430427H17Rik	194.29	337.659	47.0634	61.8852	116.551	108.941	371.904	389.156	499.828	339.945	protein_coding
XLOC_027932	Snta1	305.182	249.473	382.723	236.195	186.274	142.787	56.8576	33.7533	36.178	48.2876	protein_coding
XLOC_027957	Gss	1305.04	859.811	230.877	235.164	112.389	137.499	148.203	81.4051	99.0134	71.4657	protein_coding
XLOC_028023	Mafb	0.916462	3.48102	11.5439	12.377	27.0566	2.11536	43.8083	34.7461	73.308	127.479	protein_coding
XLOC_028025	Gm14221	241.029	190.296	361.412	174.31	53.0725	22.2113	0.932091	3.97098	0.952052	0.965752	protein_coding
XLOC_028029	Zhx3	10.9975	13.9241	30.1916	27.8483	29.1379	42.3072	96.9375	139.977	109.486	205.705	protein_coding
XLOC_028037	Ptprt	0.916462	3.48102	8.8799	23.7227	50.9913	106.826	30.759	27.7969	15.2328	15.452	protein_coding
XLOC_028051	Rims4	8.24815	25.5275	112.775	136.147	167.543	65.5762	39.1478	22.8331	8.56847	10.6233	protein_coding
XLOC_028093	Zfp334	80.6486	204.22	233.541	355.84	513.035	719.223	929.295	1061.24	1171.98	1401.31	protein_coding
XLOC_028108	Necsulea_CUFF.124165	40.3243	37.1309	41.7355	14.4399	4.16255	1.05768	0	1.98549	0	0.965752	lincRNA
XLOC_028148	E130018N17Rik	84.3145	90.5065	8.8799	3.09426	2.08128	5.2884	10.253	3.97098	13.3287	3.86301	lincRNA
XLOC_028212	Bmp7	220.867	272.68	25.7517	49.5081	98.8606	307.785	492.144	463.612	598.841	531.164	protein_coding
XLOC_028318	Rbbp8nl	0.916462	0	64.8232	82.5136	61.3976	23.269	14.9135	15.8839	22.8493	11.589	protein_coding
XLOC_028319	Gata5	0	0	0.88799	2.06284	0	0	44.7404	76.4414	86.6368	83.0547	protein_coding
XLOC_028325	Bhlhe23	0	0	14.2078	17.5341	5.20319	0	0	1.98549	80.9245	74.3629	protein_coding
XLOC_028333	Eef1a2	0	2.32068	28.4157	54.6652	30.1785	25.3843	1.86418	2.97823	0.952052	11.589	protein_coding
XLOC_028387	Zfhx4	0.916462	2.32068	6.21593	8.25136	33.3004	138.556	1155.79	1996.41	1692.75	2160.39	protein_coding
XLOC_028399	Pkia	27.4938	13.9241	47.0634	114.488	61.3976	134.325	188.282	248.186	151.376	358.294	protein_coding
XLOC_028403	Stmn2	2297.57	1661.61	2211.09	856.078	620.22	761.53	51.265	36.7316	177.082	320.63	protein_coding
XLOC_028419	Chmp4c	1073.18	1235.76	387.163	438.353	251.834	399.803	128.629	96.2963	76.1642	40.5616	protein_coding
XLOC_028439	Car3	0	0	17.7598	33.0054	12.4877	26.442	67.1106	98.2818	77.1162	56.0136	protein_coding
XLOC_028440	Car2	58.6535	52.2153	479.514	797.287	523.441	1429.98	356.059	291.867	313.225	260.753	protein_coding
XLOC_028450	Necsulea_Locus_99751|Necsulea_Locus_99508	0	0	0	0	0	0	20.506	37.7243	57.1231	56.0136	lincRNA
XLOC_028455	Bhlhe22	10.9975	17.4051	13.3198	13.4085	5.20319	14.8075	26.0986	20.8476	82.8286	147.76	protein_coding
XLOC_028512	Lrriq4	103.56	100.95	34.6316	13.4085	3.12191	7.40377	0	0.992745	0.952052	0.965752	protein_coding
XLOC_028517	Gpr160	151.216	113.713	107.447	52.6024	38.5036	67.6916	10.253	10.9202	5.71231	0.965752	protein_coding
XLOC_028522	Cldn11	0	0	1.77598	1.03142	10.4064	10.5768	21.4381	7.94196	41.8903	50.2191	protein_coding
XLOC_028621	NA	21.9951	75.422	47.9514	54.6652	140.486	54.9994	20.506	15.8839	12.3767	1.9315	lincRNA
XLOC_028639	Fat4	0.916462	0	0.88799	9.28278	19.7721	25.3843	126.764	469.568	1002.51	1801.13	protein_coding
XLOC_028646	Hspa4l	99.8943	189.135	146.518	255.792	414.174	343.746	859.388	649.255	1464.26	1152.14	protein_coding
XLOC_028676	Pcdh10	0	0	0	7.21994	4.16255	12.6922	40.0799	49.6372	134.239	85.952	protein_coding
XLOC_028725	Lhfp	3.66585	8.12237	21.3117	41.2568	57.2351	108.941	59.6538	67.5067	75.2121	225.02	protein_coding
XLOC_028738	Postn	0	0	0	0	2.08128	11.6345	18.6418	10.9202	65.6916	78.2259	protein_coding
XLOC_028744	Smad9	44.9066	51.0549	7.10392	9.28278	11.447	3.17304	130.493	167.774	147.568	113.959	protein_coding
XLOC_028792	Arhgef26	13.7469	17.4051	23.0877	56.7281	84.2917	600.763	123.968	165.788	131.383	116.856	protein_coding
XLOC_028798	Mme	563.624	1057.07	351.644	801.413	254.956	207.305	226.498	224.36	85.6847	84.0205	protein_coding
XLOC_028822	NA	90.7297	96.3082	20.4238	12.377	4.16255	6.34609	0	1.98549	0.952052	0	lincRNA
XLOC_028823	NA	50.4054	42.9325	8.8799	5.1571	3.12191	2.11536	0	0	0.952052	0	lincRNA
XLOC_028874	Fstl5	0.916462	2.32068	9.76789	4.12568	1.04064	2.11536	2.79627	0	78.0683	133.274	protein_coding
XLOC_028886	Fam198b	14.6634	42.9325	77.2551	78.3879	59.3164	42.3072	254.461	151.89	200.883	222.123	protein_coding
XLOC_028898	Fgg	24.7445	76.5824	4.43995	7.21994	15.6096	3.17304	137.017	14.8912	79.0203	11.589	protein_coding
XLOC_028899	Fga	1.83292	2.32068	0.88799	0	1.04064	0	150.067	16.8767	55.219	12.5548	protein_coding
XLOC_028906	Sfrp2	7.33169	13.9241	103.007	214.535	163.38	158.652	437.151	720.733	925.395	939.677	protein_coding
XLOC_028911	Tmem154	0	2.32068	33.7436	55.6967	93.6574	59.2301	1.86418	1.98549	1.9041	1.9315	protein_coding
XLOC_028974	Nes	413.324	661.393	277.941	1138.69	1138.46	1640.46	1587.35	2384.57	1432.84	2247.31	protein_coding
XLOC_029110	Tchh	13.7469	2.32068	131.422	92.8278	38.5036	115.287	13.9814	28.7896	6.66437	13.5205	protein_coding
XLOC_029126	Tdrkh	7.33169	32.4895	14.2078	14.4399	49.9506	49.711	96.0054	101.26	283.712	228.883	protein_coding
XLOC_029129	Celf3	0.916462	0	4.43995	3.09426	17.6908	8.46145	4.66046	9.92745	85.6847	146.794	protein_coding
XLOC_029158	Hormad1	417.906	337.659	672.208	127.896	126.958	48.6533	32.6232	16.8767	9.52052	4.82876	protein_coding
XLOC_029169	NA	0	1.16034	0	1.03142	16.6502	10.5768	17.7097	43.6808	20.9452	36.6986	lincRNA
XLOC_029220	Lix1l	114.558	155.485	66.5992	27.8483	34.3411	44.4226	210.653	241.237	417.951	672.164	protein_coding
XLOC_029240	Zfp697	21.9951	24.3671	24.8637	36.0997	100.942	70.8646	264.714	238.259	223.732	261.719	protein_coding
XLOC_029272	Nhlh2	0	1.16034	0	1.03142	0	1.05768	27.0306	52.6155	308.465	526.335	protein_coding
XLOC_029289	Dennd2c	1564.4	1800.85	1284.03	711.68	367.345	479.129	120.24	75.4486	79.9724	67.6027	protein_coding
XLOC_029314	Ppm1j	205.287	284.283	255.741	92.8278	95.7387	67.6916	36.3516	15.8839	30.4657	19.315	protein_coding
XLOC_029317	Wnt2b	25.6609	34.8102	35.5196	34.0369	157.136	83.5568	148.203	235.281	120.911	141	protein_coding
XLOC_029323	Kcnd3	4.58231	6.96204	0.88799	3.09426	0	9.51913	64.3143	28.7896	94.2532	58.9109	protein_coding
XLOC_029345	Alx3	3.66585	4.64136	2.66397	2.06284	2.08128	2.11536	9.32091	46.659	24.7534	175.767	protein_coding
XLOC_029377	Slc25a24	8.24815	15.0844	46.1755	161.933	134.242	180.863	175.233	164.796	150.424	203.774	protein_coding
XLOC_029379	Vav3	11.914	13.9241	40.8475	80.4507	114.47	71.9223	119.308	97.289	152.328	229.849	protein_coding
XLOC_029412	Dpyd	0	0	0.88799	1.03142	6.24383	61.3455	13.0493	23.8259	36.178	28.9726	protein_coding
XLOC_029431	Abca4	3.66585	3.48102	7.99191	12.377	122.795	19.0383	19.5739	15.8839	5.71231	7.72602	protein_coding
XLOC_029448	Prss12	0	3.48102	0	1.03142	35.3817	49.711	62.4501	71.4776	43.7944	56.0136	protein_coding
XLOC_029453	Tram1l1	0	2.32068	2.66397	6.18852	7.28447	11.6345	25.1665	30.7751	53.3149	81.1232	protein_coding
XLOC_029470	Neurog2	0	0	0	2.06284	0	0	20.506	36.7316	168.513	228.883	protein_coding
XLOC_029478	Pitx2	78.8157	19.7258	18.6478	60.8538	117.592	280.285	247.004	174.723	126.623	93.678	protein_coding
XLOC_029486	Cfi	0	0	0.88799	1.03142	1.04064	3.17304	51.265	28.7896	19.041	7.72602	protein_coding
XLOC_029497	Lef1	153.966	47.5739	588.737	260.949	738.853	451.63	61.518	121.115	28.5616	65.6712	protein_coding
XLOC_029519	Cxxc4	0.916462	1.16034	2.66397	9.28278	27.0566	71.9223	116.511	236.273	302.753	492.534	protein_coding
XLOC_029534	Slc39a8	1.83292	2.32068	27.5277	75.2936	138.405	811.241	331.825	325.62	178.986	141	protein_coding
XLOC_029538	Emcn	0	0	0	0	0	0	7.45673	20.8476	14.2808	57.9451	protein_coding
XLOC_029598	Clca6	34.8255	17.4051	182.038	323.866	250.794	233.747	11.1851	4.96372	0.952052	1.9315	protein_coding
XLOC_029611	Mcoln3	3.66585	12.7637	48.8394	145.43	375.67	251.728	274.035	172.738	196.123	93.678	protein_coding
XLOC_029613	Lpar3	1.83292	1.16034	6.21593	8.25136	11.447	16.9229	251.665	225.353	172.321	108.164	protein_coding
XLOC_029620	Ttll7	0.916462	1.16034	24.8637	46.4139	36.4223	53.9417	46.6046	42.688	61.8834	82.089	protein_coding
XLOC_029692	Wls	249.278	164.768	62.1593	205.253	279.932	888.452	3139.28	2489.8	2159.25	2298.49	protein_coding
XLOC_029704	Pex2	71.484	85.8651	96.7909	183.593	193.559	284.516	466.978	422.909	487.451	555.308	protein_coding
XLOC_029716	Hey1	38.4914	31.3292	27.5277	72.1994	77.0072	284.516	86.6845	107.216	198.979	333.185	protein_coding
XLOC_029769	Necsulea_blastnPlatypus.Locus_178174	0	0	0	0	0	0	32.6232	55.5937	58.0752	108.164	lincRNA
XLOC_029770	NA	0	0	0	0	0	0	6.52464	24.8186	17.1369	35.7328	lincRNA
XLOC_029771	Necsulea_Locus_99583	0	0	0	0	0	0	19.5739	31.7678	55.219	75.3287	lincRNA
XLOC_029775	NA	0	0	0	0	0	0	3.72837	18.8622	18.089	39.5958	lincRNA
XLOC_029843	Gyg	42.1572	96.3082	77.2551	143.367	173.787	142.787	450.2	314.7	424.615	275.239	protein_coding
XLOC_029871	Nlgn1	0	0	0.88799	1.03142	2.08128	0	18.6418	10.9202	95.2052	99.4725	protein_coding
XLOC_029888	Lrrc34	1365.53	1066.35	390.715	167.09	53.0725	85.6722	17.7097	14.8912	16.1849	19.315	protein_coding
XLOC_029998	C430002E04Rik	647.022	823.841	597.617	386.782	726.365	244.324	203.196	137.992	72.356	41.5274	lincRNA
XLOC_030019	Pcdh18	0	1.16034	63.0473	109.33	70.7634	118.46	250.733	337.533	426.519	954.163	protein_coding
XLOC_030020	Slc7a11	29.3268	30.1688	24.8637	22.6912	21.8534	10.5768	5.59255	55.5937	49.5067	236.609	protein_coding
XLOC_030077	Pfn2	87.9803	109.072	97.6789	141.305	149.852	176.633	443.675	486.445	745.457	941.609	protein_coding
XLOC_030098	Igsf10	0	9.28271	49.7274	90.7649	94.6981	176.633	148.203	170.752	118.054	142.931	protein_coding
XLOC_030111	Plch1	101.727	136.92	320.564	386.782	434.987	418.842	1324.5	1369	1075.82	1221.68	protein_coding
XLOC_030140	NA	0	0	0.88799	0	1.04064	0	81.0919	150.897	63.7875	42.4931	lincRNA
XLOC_030187	Bche	4.58231	6.96204	45.2875	62.9166	29.1379	25.3843	96.0054	89.347	151.376	175.767	protein_coding
XLOC_030195	Golim4	51.3218	84.7048	64.8232	85.6078	160.258	202.017	348.602	529.133	486.499	569.794	protein_coding
XLOC_030218	Gucy1b3	1.83292	0	7.99191	38.1625	35.3817	37.0188	19.5739	12.9057	23.8013	86.9177	protein_coding
XLOC_030226	Fgb	0	0	0	0	5.20319	2.11536	350.466	40.7025	127.575	21.2466	protein_coding
XLOC_030275	Tmem79	66.9017	30.1688	270.837	195.97	56.1945	41.2496	40.0799	30.7751	22.8493	17.3835	protein_coding
XLOC_030289	Rab25	13.7469	12.7637	116.327	168.121	180.03	206.248	34.4874	35.7388	29.5136	16.4178	protein_coding
XLOC_030295	Syt11	25.6609	63.8187	176.71	531.181	322.598	166.056	172.437	317.678	516.964	792.883	protein_coding
XLOC_030335	S100a1	337.258	211.182	14.2078	22.6912	52.0319	68.7493	221.838	51.6227	125.671	62.7739	protein_coding
XLOC_030382	Hrnr	10.9975	29.0085	69.2632	92.8278	282.013	305.67	7.45673	17.8694	2.85616	3.86301	protein_coding
XLOC_030413	Cgn	97.1449	206.54	1022.96	1149	1089.55	938.163	586.285	510.271	353.211	247.233	protein_coding
XLOC_030428	Bnipl	89.8132	76.5824	371.18	167.09	93.6574	62.4032	16.7776	11.9129	13.3287	6.76027	protein_coding
XLOC_030446	Car14	0	0	60.3833	188.75	395.442	680.089	667.377	912.333	731.176	904.91	protein_coding
XLOC_030448	Plekho1	19.2457	12.7637	37.2956	58.7909	142.567	216.825	320.639	402.062	372.252	527.301	protein_coding
XLOC_030553	Casq2	67.8182	192.616	9.76789	11.3456	26.016	30.6727	70.8389	89.347	66.6437	54.0821	protein_coding
XLOC_030562	Sycp1	17.4128	35.9705	239.757	95.922	59.3164	17.9806	29.8269	21.8404	15.2328	11.589	protein_coding
XLOC_030574	BC027582	9.16462	3.48102	0.88799	11.3456	13.5283	25.3843	223.702	182.665	365.588	276.205	protein_coding
XLOC_030588	Wnt2b	0	0	3.55196	3.09426	6.24383	19.0383	13.0493	16.8767	118.054	176.733	protein_coding
XLOC_030624	Csf1	2.74938	4.64136	2.66397	10.3142	42.6662	50.7687	84.8203	92.3253	86.6368	122.651	protein_coding
XLOC_030629	Gstm2	1290.38	877.216	270.837	504.364	171.705	140.672	309.454	115.158	203.739	103.336	protein_coding
XLOC_030643	Celsr2	65.9852	194.937	117.215	204.221	394.402	406.149	849.135	1215.12	2482	2781.37	protein_coding
XLOC_030656	Fam102b	23.828	38.2912	110.111	245.478	247.672	170.287	384.954	510.271	398.91	528.267	protein_coding
XLOC_030676	S1pr1	17.4128	12.7637	1.77598	4.12568	4.16255	5.2884	30.759	37.7243	57.1231	152.589	protein_coding
XLOC_030708	Ptbp2	563.624	415.401	650.008	1075.77	1377.8	1601.33	1901.47	2453.07	2629.57	3406.21	protein_coding
XLOC_030800	Npnt	22.9115	76.5824	34.6316	56.7281	44.7474	27.4997	480.027	520.198	234.205	148.726	protein_coding
XLOC_030832	Dapp1	132.887	91.6668	152.734	71.168	26.016	21.1536	10.253	8.9347	8.56847	7.72602	protein_coding
XLOC_030834	Mttp	16.4963	22.0464	91.4629	118.613	245.591	205.19	1387.88	466.59	516.012	192.185	protein_coding
XLOC_030884	Clca3	0	3.48102	7.99191	5.1571	2.08128	1.05768	2.79627	6.94921	98.0614	84.9862	protein_coding
XLOC_030888	Cyr61	45.8231	93.9875	256.629	1119.09	715.959	1310.47	1090.55	977.854	917.778	800.609	protein_coding
XLOC_030913	Lphn2	200.705	208.861	846.254	1505.87	2025.08	3422.66	1506.26	1713.48	1481.39	1416.76	protein_coding
XLOC_030932	Dnajb4	54.9877	46.4136	59.4953	51.571	200.843	126.922	245.14	253.15	287.52	296.486	protein_coding
XLOC_030968	Cth	2362.64	2549.27	1189.02	1010.79	222.697	405.092	141.678	124.093	168.513	304.212	protein_coding
XLOC_031097	Clvs1	0	0	0	0	0	1.05768	1.86418	5.95647	60.9314	74.3629	protein_coding
XLOC_031115	Trp53inp1	6126.55	7114.04	6412.17	6712.48	3419.54	2629.39	1848.34	1347.15	1222.44	1250.65	protein_coding
XLOC_031198	Faxc	63.2358	63.8187	107.447	167.09	258.078	333.169	373.769	619.473	536.958	703.068	protein_coding
XLOC_031241	Epha7	87.9803	69.6204	89.6869	115.519	185.234	266.536	570.44	748.53	491.259	574.623	protein_coding
XLOC_031263	Bach2	21.0786	19.7258	26.6397	40.2254	215.412	189.325	302.93	387.171	402.718	486.739	protein_coding
XLOC_031264	D130062J21Rik	1.83292	1.16034	0.88799	3.09426	23.9347	16.9229	13.9814	43.6808	34.2739	45.3904	protein_coding
XLOC_031289	Cnr1	6.41523	5.8017	179.374	425.976	273.688	254.901	163.116	175.716	221.828	235.644	protein_coding
XLOC_031367	Gm10600	0	1.16034	0	1.03142	14.5689	5.2884	31.6911	52.6155	38.0821	38.6301	protein_coding
XLOC_031378	4930578G10Rik	1.83292	2.32068	15.9838	3.09426	39.5442	22.2113	257.257	367.316	343.691	337.048	protein_coding
XLOC_031420	Frmpd1	3.66585	3.48102	15.9838	41.2568	33.3004	56.0571	154.727	61.5502	96.1573	31.8698	protein_coding
XLOC_031429	Aldh1b1	238.28	121.836	87.023	130.99	97.82	69.8069	21.4381	13.8984	19.041	24.1438	protein_coding
XLOC_031432	Tdrd7	20.1622	23.2068	25.7517	45.3825	228.94	151.248	152.863	126.079	147.568	137.137	protein_coding
XLOC_031449	Tgfbr1	698.344	707.807	564.761	739.528	762.788	994.22	2134.49	2662.54	2946.6	3291.28	protein_coding
XLOC_031529	NA	117.307	81.2237	32.8556	17.5341	3.12191	5.2884	0	0.992745	0	0	lincRNA
XLOC_031564	Mup6	15.5798	5.8017	109.223	141.305	41.6255	72.98	4.66046	4.96372	0	1.9315	protein_coding
XLOC_031605	Zfp618	9.16462	3.48102	59.4953	109.33	156.096	159.71	677.63	852.768	767.354	996.656	protein_coding
XLOC_031625	Pappa	0	1.16034	0.88799	4.12568	12.4877	46.538	572.304	782.283	1178.64	434.589	protein_coding
XLOC_031720	Sh3gl2	211.703	320.254	95.9029	91.7964	122.795	65.5762	37.2837	57.5792	29.5136	23.1781	protein_coding
XLOC_031814	Tek	146.634	145.042	192.694	287.766	43.7068	40.1919	43.8083	86.3688	14.2808	53.1164	protein_coding
XLOC_031829	Nfia	3.66585	22.0464	2.66397	5.1571	15.6096	20.0959	33.5553	53.6082	60.9314	322.561	protein_coding
XLOC_031836	L1td1	2672.4	1435.34	7473.32	6345.29	2707.74	2623.05	359.787	304.773	100.918	58.9109	protein_coding
XLOC_031853	Foxd3	186.042	119.515	539.01	307.363	176.908	184.036	1.86418	3.97098	26.6575	49.2534	protein_coding
XLOC_031861	Ror1	12.8305	10.4431	23.9757	130.99	220.615	266.536	132.357	125.086	116.15	197.979	protein_coding
XLOC_031875	Dnajc6	960.452	920.149	507.93	460.013	278.891	248.555	42.8762	37.7243	36.178	56.9794	protein_coding
XLOC_031994	Trabd2b	0	1.16034	0	3.09426	12.4877	46.538	170.573	239.252	119.959	118.788	protein_coding
XLOC_032018	Mob3c	408.742	153.165	33.7436	34.0369	15.6096	8.46145	19.5739	23.8259	24.7534	22.2123	protein_coding
XLOC_032072	2610528J11Rik	7.33169	5.8017	55.9433	67.0423	130.08	37.0188	54.9934	10.9202	20.9452	14.4863	protein_coding
XLOC_032085	NA	10.0811	5.8017	9.76789	11.3456	46.8287	29.6151	52.1971	43.6808	103.774	86.9177	lincRNA
XLOC_032140	Mycl	258.442	228.587	332.108	500.239	445.393	963.547	921.838	953.035	1506.15	1667.85	protein_coding
XLOC_032147	Heyl	0	0	0	2.06284	2.08128	1.05768	3.72837	4.96372	33.3218	83.0547	protein_coding
XLOC_032168	Pou3f1	40.3243	70.7807	705.064	1716.28	1373.64	723.454	95.0733	54.601	27.6095	117.822	protein_coding
XLOC_032226	AU040320	99.8943	122.996	47.0634	79.4193	195.64	205.19	364.448	376.25	424.615	399.821	protein_coding
XLOC_032233	Dlgap3	627.776	483.861	209.566	135.116	109.267	78.2684	41.9441	64.5284	38.0821	56.9794	protein_coding
XLOC_032250	Tmem54	0	1.16034	110.111	202.158	85.3323	48.6533	18.6418	13.8984	12.3767	7.72602	protein_coding
XLOC_032289	Laptm5	526.049	610.338	130.534	57.7595	13.5283	10.5768	5.59255	5.95647	1.9041	1.9315	protein_coding
XLOC_032306	Tmem200b	4.58231	3.48102	8.8799	5.1571	9.36574	5.2884	165.912	135.013	200.883	148.726	protein_coding
XLOC_032316	Smpdl3b	185.125	89.3461	48.8394	48.4767	18.7315	26.442	4.66046	11.9129	2.85616	1.9315	protein_coding
XLOC_032341	Aim1l	273.106	214.663	192.694	89.7335	77.0072	54.9994	36.3516	18.8622	24.7534	11.589	protein_coding
XLOC_032343	Trim63	92.5626	102.11	106.559	50.5396	42.6662	29.6151	5.59255	0	6.66437	1.9315	protein_coding
XLOC_032344	Slc30a2	162.214	174.051	13.3198	33.0054	20.8128	14.8075	12.1172	10.9202	4.76026	3.86301	protein_coding
XLOC_032353	Rhd	6.41523	10.4431	206.902	99.0163	48.91	26.442	12.1172	14.8912	4.76026	1.9315	protein_coding
XLOC_032380	Id3	10.0811	3.48102	404.923	527.055	189.396	502.398	1672.17	1747.23	1983.13	2353.54	protein_coding
XLOC_032383	Tcea3	362.919	357.384	579.857	234.132	103.023	175.575	20.506	35.7388	18.089	13.5205	protein_coding
XLOC_032398	Wnt4	0.916462	0	0.88799	14.4399	32.2598	22.2113	23.3023	25.8114	64.7396	193.15	protein_coding
XLOC_032419	Camk2n1	153.049	149.684	20.4238	8.25136	60.357	34.9035	180.826	194.578	496.971	861.451	protein_coding
XLOC_032429	Tmco4	282.27	212.342	154.51	112.425	74.9259	75.0953	36.3516	15.8839	17.1369	14.4863	protein_coding
XLOC_032464	Mfap2	0	0	5.32794	10.3142	21.8534	16.9229	43.8083	50.63	70.4519	106.233	protein_coding
XLOC_032475	Epha2	669.933	608.018	3555.51	1971.04	944.899	1735.65	335.553	244.215	675.005	457.767	protein_coding
XLOC_032523	Gm13128	219.034	118.355	11.5439	3.09426	0	1.05768	0	0	0.952052	0	protein_coding
XLOC_032542	Gm13225	75.1498	68.46	69.2632	41.2568	20.8128	19.0383	6.52464	15.8839	1.9041	3.86301	protein_coding
XLOC_032543	Gm13225	2589.92	1795.04	2639.1	1580.14	737.812	511.918	133.289	211.455	64.7396	69.5342	protein_coding
XLOC_032562	Gm13235	215.368	135.76	320.564	250.635	137.364	62.4032	15.8456	10.9202	3.80821	3.86301	protein_coding
XLOC_032563	NA	805.57	422.363	710.392	406.379	101.983	70.8646	4.66046	18.8622	4.76026	8.69177	lincRNA
XLOC_032581	Gm13251	2596.34	2132.7	2551.19	1689.47	1119.73	834.51	400.799	466.59	236.109	249.164	protein_coding
XLOC_032586	Gm13247	1819.18	1248.52	2588.49	1737.94	731.569	518.264	90.4129	108.209	23.8013	27.0411	protein_coding
XLOC_032675	Slc25a33	93.4791	11.6034	26.6397	11.3456	0	1.05768	0	0	0	0.965752	protein_coding
XLOC_032681	Gpr157	13.7469	53.3756	4.43995	12.377	38.5036	26.442	137.95	105.231	228.493	155.486	protein_coding
XLOC_032713	Gpr153	9.16462	9.28271	34.6316	60.8538	110.308	129.037	273.103	248.186	152.328	185.424	protein_coding
XLOC_032740	Hes5	2.74938	8.12237	0	5.1571	9.36574	2.11536	57.7897	80.4123	345.595	439.417	protein_coding
XLOC_032824	Tox	5.49877	0	5.32794	8.25136	8.3251	16.9229	50.3329	70.4849	130.431	109.13	protein_coding
XLOC_032863	Esrp1	55.9042	141.561	871.118	1284.12	1774.29	1545.27	384.954	439.786	333.218	194.116	protein_coding
XLOC_032883	Slc26a7	0.916462	0	3.55196	0	2.08128	2.11536	1.86418	0.992745	15.2328	160.315	protein_coding
XLOC_032926	Nkain3	0	0	0	3.09426	0	10.5768	13.0493	12.9057	49.5067	97.541	protein_coding
XLOC_032928	Prdm13	2.74938	4.64136	7.10392	6.18852	2.08128	2.11536	274.035	244.215	99.9655	253.993	protein_coding
XLOC_032935	Pou3f2	6.41523	4.64136	3.55196	0	3.12191	0	465.114	567.85	1350.01	1904.46	protein_coding
XLOC_033048	Ddx58	230.948	127.637	911.077	445.573	162.34	162.883	134.221	81.4051	94.2532	57.9451	protein_coding
XLOC_033073	Aqp3	1777.02	1408.65	472.41	258.886	43.7068	22.2113	120.24	112.18	45.6985	30.9041	protein_coding
XLOC_033087	Enho	7.33169	15.0844	27.5277	58.7909	62.4383	65.5762	96.9375	72.4704	221.828	185.424	protein_coding
XLOC_033089	Cntfr	0.916462	12.7637	25.7517	22.6912	55.1538	69.8069	279.627	340.512	397.006	375.678	protein_coding
XLOC_033126	Tpm2	32.0762	27.8481	202.462	299.112	391.28	353.265	293.609	212.447	199.931	176.733	protein_coding
XLOC_033171	Igfbpl1	12.8305	5.8017	12.4319	36.0997	22.894	15.8652	27.9627	24.8186	127.575	258.822	protein_coding
XLOC_033182	Coro2a	4.58231	11.6034	41.7355	107.268	151.933	97.3066	167.776	149.904	122.815	56.9794	protein_coding
XLOC_033209	Aldob	0	0	0	0	8.3251	4.23072	92.277	15.8839	13.3287	5.79451	protein_coding
XLOC_033210	Tmem246	6.41523	15.0844	48.8394	106.236	112.389	125.864	120.24	75.4486	71.4039	104.301	protein_coding
XLOC_033238	Abca1	63.2358	112.553	110.111	60.8538	45.7881	38.0765	384.022	250.172	657.868	1264.17	protein_coding
XLOC_033265	Klf4	1816.43	2135.02	1022.08	415.662	61.3976	49.711	102.53	96.2963	119.959	71.4657	protein_coding
XLOC_033287	Ptpn3	349.172	556.963	1156.16	1063.39	1259.17	864.125	271.239	175.716	155.185	130.377	protein_coding
XLOC_033297	Svep1	0	0	0	2.06284	9.36574	4.23072	293.609	733.639	343.691	454.869	protein_coding
XLOC_033305	Ptgr1	2543.18	1200.95	2228.85	2191.77	445.393	723.454	406.392	297.823	250.39	319.664	protein_coding
XLOC_033352	Ambp	3.66585	3.48102	0	0	0	0	87.6166	62.5429	79.0203	41.5274	protein_coding
XLOC_033369	Tnc	0	0	0	2.06284	11.447	17.9806	29.8269	179.687	39.9862	98.5067	protein_coding
XLOC_033402	Rasef	2.74938	6.96204	114.551	259.918	134.242	144.902	63.3822	114.166	68.5478	86.9177	protein_coding
XLOC_033435	Nfib	263.941	215.823	132.31	78.3879	99.9013	72.98	49.4008	157.846	230.397	798.677	protein_coding
XLOC_033437	Cer1	0	0	0.88799	3.09426	13.5283	3407.85	0	0	0.952052	0	protein_coding
XLOC_033438	Frem1	0	0	18.6478	14.4399	56.1945	157.594	217.177	501.336	577.896	417.205	protein_coding
XLOC_033473	Ptplad2	14.6634	17.4051	6.21593	12.377	9.36574	14.8075	148.203	97.289	157.089	81.1232	protein_coding
XLOC_033509	Cdkn2a	242.862	207.701	75.4791	51.571	33.3004	17.9806	35.4195	21.8404	20.9452	16.4178	protein_coding
XLOC_033552	Jun	69.6511	71.941	130.534	269.201	268.485	557.398	495.873	710.805	584.56	832.479	protein_coding
XLOC_033669	Zyg11a	540.712	893.461	325.892	182.561	201.884	133.268	48.4688	40.7025	23.8013	3.86301	protein_coding
XLOC_033686	3110021N24Rik	0	9.28271	7.99191	14.4399	40.5849	52.884	37.2837	78.4269	39.0341	41.5274	protein_coding
XLOC_033714	Elavl4	83.398	71.941	48.8394	42.2882	33.3004	22.2113	78.2957	91.3325	407.478	579.451	protein_coding
XLOC_033758	Foxd2	0.916462	0	0.88799	1.03142	0	1.05768	71.771	87.3616	134.239	119.753	protein_coding
XLOC_033769	Cyp4b1	0	0	0	0	0	1.05768	41.9441	34.7461	37.13	15.452	protein_coding
XLOC_033793	Hpdl	268.523	110.232	266.397	167.09	54.1132	27.4997	7.45673	11.9129	9.52052	9.65752	protein_coding
XLOC_033832	Tie1	0	2.32068	22.1997	7.21994	9.36574	2.11536	13.0493	43.6808	14.2808	112.993	protein_coding
XLOC_033902	Mfsd2a	0.916462	4.64136	39.0715	57.7595	34.3411	43.3649	63.3822	55.5937	124.719	148.726	protein_coding
XLOC_033992	Gjb3	2594.5	1567.62	505.266	602.349	73.8853	84.6145	103.462	72.4704	48.5547	28.0068	protein_coding
XLOC_033993	Gjb4	53.1548	31.3292	9.76789	3.09426	0	0	0	0.992745	0	0	protein_coding
XLOC_033994	Gjb5	420.656	360.865	134.086	89.7335	10.4064	8.46145	41.012	6.94921	21.8972	3.86301	protein_coding
XLOC_034002	Zfp362	9.16462	22.0464	10.6559	25.7855	68.6821	71.9223	199.468	353.417	282.76	297.452	protein_coding
XLOC_034012	Zbtb8a	927.459	682.279	1175.7	1126.31	447.474	340.573	83.8882	80.4123	36.178	54.0821	protein_coding
XLOC_034053	Ptpru	26.5774	45.2532	132.31	167.09	192.518	122.691	267.51	357.388	286.568	233.712	protein_coding
XLOC_034082	Smpdl3b	281.354	90.5065	562.985	399.159	150.893	127.979	67.1106	52.6155	52.3629	35.7328	protein_coding
XLOC_034106	Sfn	509.553	486.182	560.321	670.423	246.631	232.69	71.771	49.6372	33.3218	19.315	protein_coding
XLOC_034120	Lin28a	1908.07	1333.23	6564.91	8509.21	5692.29	7868.09	5717.45	4725.47	2114.51	753.287	protein_coding
XLOC_034132	Grrp1	17.4128	24.3671	16.8718	13.4085	6.24383	62.4032	324.368	373.272	355.116	278.137	protein_coding
XLOC_034135	Extl1	127.388	208.861	29.3037	12.377	23.9347	7.40377	16.7776	12.9057	25.7054	23.1781	protein_coding
XLOC_034140	Sepn1	9.16462	61.498	47.0634	76.3251	225.818	338.458	396.139	371.287	403.67	300.349	protein_coding
XLOC_034162	Grhl3	528.798	505.908	482.178	218.661	95.7387	86.7298	36.3516	28.7896	10.4726	22.2123	protein_coding
XLOC_034186	Ephb2	88.8968	165.929	229.989	280.546	429.784	551.052	1333.82	1452.39	2555.31	2467.5	protein_coding
XLOC_034190	Epha8	0.916462	4.64136	93.2389	109.33	150.893	56.0571	8.38882	4.96372	16.1849	29.9383	protein_coding
XLOC_034212	Alpl	2725.56	2637.45	885.326	634.323	745.097	448.457	674.834	626.422	268.479	222.123	protein_coding
XLOC_034236	Pax7	0.916462	1.16034	0.88799	0	3.12191	13.7499	154.727	163.803	239.917	271.376	protein_coding
XLOC_034238	Klhdc7a	187.875	165.929	5.32794	11.3456	18.7315	23.269	97.8696	73.4631	48.5547	34.7671	protein_coding
XLOC_034247	Padi4	205.287	192.616	31.9676	11.3456	23.9347	14.8075	3.72837	6.94921	2.85616	0.965752	protein_coding
XLOC_034248	Padi3	84.3145	148.523	47.0634	41.2568	66.6008	58.1725	13.0493	7.94196	3.80821	0	protein_coding
XLOC_034262	Clcnkb	43.9902	34.8102	31.0796	10.3142	5.20319	3.17304	1.86418	0.992745	0	0	protein_coding
XLOC_034287	Gm13052	0	0	0	3.09426	14.5689	11.6345	53.1292	145.934	119.007	77.2602	lincRNA
XLOC_034289	NA	0	1.16034	0	2.06284	19.7721	8.46145	39.1478	126.079	68.5478	60.8424	lincRNA
XLOC_034290	Necsulea_CUFF.91859	0.916462	2.32068	7.10392	33.0054	206.046	186.152	630.094	1401.76	1074.87	951.266	lincRNA
XLOC_034291	NA	0	2.32068	0.88799	6.18852	59.3164	34.9035	136.085	310.729	251.342	226.952	lincRNA
XLOC_034292	NA	0	0	0	0	14.5689	3.17304	30.759	67.5067	51.4108	52.1506	lincRNA
XLOC_034293	NA	0	0	0	0	13.5283	4.23072	20.506	63.5357	34.2739	24.1438	lincRNA
XLOC_034294	NA	0	1.16034	3.55196	17.5341	80.1291	84.6145	244.208	500.343	410.335	370.849	lincRNA
XLOC_034321	Pramef17	147.55	63.8187	2.66397	3.09426	0	0	2.79627	1.98549	0	1.9315	protein_coding
XLOC_034329	Pramef12	927.459	1203.27	839.15	674.549	231.022	147.018	168.709	64.5284	83.7806	32.8356	protein_coding
XLOC_034356	Gm21411	610.363	360.865	748.575	478.579	303.866	191.44	41.012	41.6953	19.9931	13.5205	protein_coding
XLOC_034377	Gm13157	1542.4	1170.78	1156.16	783.879	489.1	375.477	260.053	271.019	256.102	164.178	protein_coding
XLOC_034389	Draxin	2.74938	6.96204	7.10392	6.18852	22.894	4.23072	418.509	416.953	146.616	246.267	protein_coding
XLOC_034394	Ptchd2	0.916462	3.48102	7.99191	8.25136	10.4064	5.2884	19.5739	12.9057	72.356	129.411	protein_coding
XLOC_034431	Spsb1	105.393	138.08	72.8151	60.8538	62.4383	35.9612	289.88	342.497	383.677	366.986	protein_coding
XLOC_034438	Slc45a1	4.58231	1.16034	39.0715	90.7649	77.0072	35.9612	9.32091	6.94921	7.61642	13.5205	protein_coding
XLOC_034452	Espn	15.5798	29.0085	47.0634	101.079	330.923	255.959	337.417	277.969	378.917	202.808	protein_coding
XLOC_034481	Prdm16	56.8206	60.3376	38.1836	20.6284	22.894	10.5768	132.357	139.977	111.39	107.199	protein_coding
XLOC_034482	Gm13110	241.029	146.203	110.999	45.3825	28.0972	13.7499	8.38882	2.97823	6.66437	1.9315	lincRNA
XLOC_034622	Abcb1a	307.931	122.996	206.014	127.896	47.8694	31.7304	19.5739	14.8912	5.71231	6.76027	protein_coding
XLOC_034623	Abcb1b	355.587	286.604	438.667	543.558	148.811	76.153	65.2464	47.6518	22.8493	22.2123	protein_coding
XLOC_034655	Sema3d	1.83292	8.12237	10.6559	35.0683	12.4877	22.2113	317.843	183.658	194.219	106.233	protein_coding
XLOC_034659	Sema3a	0	0	0.88799	4.12568	6.24383	46.538	467.91	389.156	273.239	241.438	protein_coding
XLOC_034663	Sema3e	13.7469	3.48102	229.989	793.162	710.756	983.643	251.665	170.752	119.007	84.9862	protein_coding
XLOC_034669	Hgf	2.74938	2.32068	26.6397	83.545	55.1538	22.2113	7.45673	10.9202	2.85616	15.452	protein_coding
XLOC_034707	Kmt2e	283.187	295.886	206.902	300.143	996.931	834.51	876.166	1438.49	1423.32	1452.49	protein_coding
XLOC_034742	Actr3b	264.857	242.511	208.678	181.53	122.795	121.633	53.1292	38.7171	30.4657	41.5274	protein_coding
XLOC_034760	En2	139.302	110.232	66.5992	39.194	8.3251	3.17304	10.253	28.7896	59.9793	47.3219	protein_coding
XLOC_034783	Drc1	0	0	47.9514	28.8798	18.7315	61.3455	5.59255	1.98549	2.85616	0.965752	protein_coding
XLOC_034795	Emilin1	72.4005	61.498	90.5749	70.1365	106.145	93.0759	274.967	582.741	235.157	555.308	protein_coding
XLOC_034804	Trim54	45.8231	41.7722	27.5277	55.6967	52.0319	57.1148	7.45673	5.95647	0.952052	0.965752	protein_coding
XLOC_034830	Fosl2	21.9951	11.6034	43.5115	110.362	243.509	278.17	134.221	138.984	117.102	170.938	protein_coding
XLOC_034853	Fgfr3	38.4914	27.8481	95.0149	52.6024	66.6008	49.711	581.625	262.085	1267.18	1190.77	protein_coding
XLOC_034857	Nat8l	15.5798	15.0844	114.551	155.744	119.673	89.9029	242.344	177.701	182.794	211.5	protein_coding
XLOC_034879	Hmx1	1.83292	6.96204	0	3.09426	2.08128	0	154.727	96.2963	80.9245	28.9726	protein_coding
XLOC_034894	Ppp2r2c	782.658	909.706	145.63	250.635	141.527	131.152	106.258	59.5647	66.6437	41.5274	protein_coding
XLOC_034895	Jakmip1	800.071	670.676	73.7031	51.571	93.6574	136.441	14.9135	5.95647	4.76026	6.76027	protein_coding
XLOC_034897	Crmp1	12.8305	19.7258	409.363	506.427	525.522	410.38	141.678	157.846	364.636	676.992	protein_coding
XLOC_034950	Lap3	8992.32	7174.38	4164.67	2813.71	1245.64	1704.98	1534.22	1214.13	1415.7	1345.29	protein_coding
XLOC_035007	Pcdh7	0	0	0.88799	3.09426	27.0566	1085.18	94.1412	135.013	265.623	227.918	protein_coding
XLOC_035045	Klb	634.191	328.376	67.4872	57.7595	52.0319	40.1919	295.473	144.941	123.767	43.4589	protein_coding
XLOC_035055	Chrna9	15.5798	3.48102	152.734	47.4453	10.4064	17.9806	0.932091	0	0.952052	0	protein_coding
XLOC_035104	Guttman_lincRNA_1185|Necsulea_CUFF.69822	161.297	81.2237	27.5277	39.194	20.8128	9.51913	1.86418	2.97823	1.9041	1.9315	lincRNA
XLOC_035129	C530008M17Rik	26.5774	26.6878	39.0715	90.7649	229.981	321.535	687.883	1131.73	952.052	1059.43	protein_coding
XLOC_035175	Csn3	0	0	0	15.4713	9.36574	4.23072	90.4129	35.7388	14.2808	15.452	protein_coding
XLOC_035198	Slc4a4	31.1597	134.599	82.583	260.949	564.026	989.989	540.613	430.851	595.033	429.76	protein_coding
XLOC_035207	Afp	0	0	0	3.09426	22.894	3.17304	2029.16	451.699	453.177	155.486	protein_coding
XLOC_035215	Cxcl15	0	0	0	0	0	0	7.45673	12.9057	82.8286	105.267	protein_coding
XLOC_035219	Mthfd2l	1.83292	3.48102	14.2078	36.0997	56.1945	54.9994	83.8882	124.093	143.76	214.397	protein_coding
XLOC_035224	Parm1	0	9.28271	14.2078	24.7541	71.804	212.594	95.0733	72.4704	203.739	141.966	protein_coding
XLOC_035238	Stbd1	1.83292	1.16034	7.99191	24.7541	33.3004	44.4226	49.4008	46.659	63.7875	61.8082	protein_coding
XLOC_035245	Ccng2	251.11	175.211	139.414	154.713	632.708	816.53	510.786	479.496	653.108	929.054	protein_coding
XLOC_035271	Fras1	10.0811	22.0464	44.3995	132.022	388.158	399.803	1814.78	1796.87	2173.54	1679.44	protein_coding
XLOC_035272	Anxa3	4.58231	9.28271	27.5277	120.676	87.4136	106.826	109.987	87.3616	91.397	83.0547	protein_coding
XLOC_035310	Prdm8	2.74938	2.32068	1.77598	4.12568	15.6096	13.7499	5.59255	11.9129	339.883	580.417	protein_coding
XLOC_035311	Fgf5	0.916462	1.16034	50.6154	266.106	679.537	1458.54	24.2344	8.9347	9.52052	19.315	protein_coding
XLOC_035340	Cds1	194.29	158.966	364.964	434.228	517.197	451.63	123.036	82.3978	63.7875	32.8356	protein_coding
XLOC_035342	Arhgap24	0	0	7.10392	21.6598	39.5442	39.1342	225.566	228.331	99.9655	95.6095	protein_coding
XLOC_035344	Ptpn13	274.938	316.773	695.296	1496.59	2856.55	2020.17	2834.49	3280.03	2852.35	2732.11	protein_coding
XLOC_035368	Spp1	6065.14	5943.26	2298.12	1390.35	559.863	355.381	470.706	298.816	171.369	119.753	protein_coding
XLOC_035380	Lrrc8c	10.9975	42.9325	49.7274	133.053	263.281	260.19	137.95	171.745	105.678	105.267	protein_coding
XLOC_035468	Mn1	69.6511	148.523	73.7031	70.1365	106.145	68.7493	468.842	427.873	685.478	591.04	protein_coding
XLOC_035471	C130026L21Rik	0	1.16034	0	1.03142	0	0	33.5553	36.7316	37.13	28.9726	protein_coding
XLOC_035506	Acacb	505.887	592.933	387.163	284.672	222.697	117.403	88.5487	80.4123	47.6026	30.9041	protein_coding
XLOC_035536	Msi1	152.133	239.03	75.4791	132.022	446.434	405.092	799.734	1056.28	1539.47	1466.98	protein_coding
XLOC_035537	Pla2g1b	398.661	176.372	415.579	354.808	126.958	109.999	12.1172	10.9202	3.80821	3.86301	protein_coding
XLOC_035556	Srrm4	181.459	205.38	7.99191	3.09426	17.6908	1.05768	1.86418	3.97098	0	0.965752	protein_coding
XLOC_035597	Tbx3	1438.84	1597.79	636.689	326.96	93.6574	90.9606	137.95	213.44	136.143	259.787	protein_coding
XLOC_035598	Tbx5	0	0	0.88799	1.03142	2.08128	2.11536	0.932091	46.659	20.9452	98.5067	protein_coding
XLOC_035606	Lhx5	0.916462	1.16034	1.77598	1.03142	1.04064	0	6.52464	0.992745	64.7396	184.459	protein_coding
XLOC_035612	Rasal1	148.467	185.654	168.718	126.865	105.104	54.9994	67.1106	19.8549	32.3698	3.86301	protein_coding
XLOC_035618	Oas1d	197.039	187.975	93.2389	62.9166	88.4542	46.538	14.9135	10.9202	13.3287	3.86301	protein_coding
XLOC_035651	Setd1b	27.4938	41.7722	174.934	158.839	250.794	184.036	178.962	390.149	232.301	236.609	protein_coding
XLOC_035707	Tmem132c	38.4914	55.6963	3.55196	1.03142	13.5283	15.8652	466.978	304.773	409.383	536.958	protein_coding
XLOC_035709	Glt1d1	656.186	481.541	554.105	486.83	390.239	315.189	157.523	148.912	73.308	53.1164	protein_coding
XLOC_035716	Fzd10	1112.58	869.094	133.198	92.8278	46.8287	95.1913	262.85	193.585	192.315	452.938	protein_coding
XLOC_035754	Gatsl2	29.3268	73.1014	55.0554	126.865	343.411	358.554	265.646	274.99	245.63	217.294	protein_coding
XLOC_035789	Hspb1	2032.71	1307.7	3105.3	1638.93	355.898	407.207	198.535	103.245	116.15	61.8082	protein_coding
XLOC_035795	Upk3b	5.49877	2.32068	20.4238	14.4399	5.20319	6.34609	96.0054	35.7388	206.595	137.137	protein_coding
XLOC_035879	Lfng	31.1597	17.4051	52.3914	206.284	91.5762	87.7875	348.602	246.201	359.876	333.185	protein_coding
XLOC_035887	Sdk1	3.66585	8.12237	26.6397	23.7227	60.357	83.5568	55.9255	59.5647	73.308	117.822	protein_coding
XLOC_035924	Nptx2	301.516	505.908	351.644	187.718	205.006	432.592	64.3143	73.4631	49.5067	56.9794	protein_coding
XLOC_035960	Rasl11a	5.49877	11.6034	59.4953	119.645	35.3817	48.6533	159.388	125.086	132.335	109.13	protein_coding
XLOC_036026	Fzd1	42.1572	39.4515	30.1916	78.3879	66.6008	177.69	363.516	462.619	384.629	504.123	protein_coding
XLOC_036084	Cd36	0	0	1.77598	1.03142	1.04064	8.46145	203.196	105.231	51.4108	22.2123	protein_coding
XLOC_036147	Kcnh2	63.2358	106.751	85.247	115.519	143.608	81.4414	288.948	320.657	582.656	544.684	protein_coding
XLOC_036148	Atg9b	175.044	153.165	147.406	96.9535	56.1945	63.4609	15.8456	30.7751	20.9452	28.9726	protein_coding
XLOC_036153	Gbx1	20.1622	34.8102	23.9757	7.21994	5.20319	1.05768	68.0427	99.2745	144.712	105.267	protein_coding
XLOC_036158	Smarcd3	296.017	264.557	31.9676	17.5341	15.6096	7.40377	80.1599	103.245	99.9655	161.281	protein_coding
XLOC_036196	Cnpy1	637.857	478.06	380.948	176.373	91.5762	46.538	27.9627	16.8767	27.6095	49.2534	protein_coding
XLOC_036210	Mnx1	26.5774	35.9705	5.32794	4.12568	2.08128	8.46145	93.2091	117.144	170.417	128.445	protein_coding
XLOC_036236	Fndc4	32.0762	37.1309	156.286	211.441	164.421	205.19	298.269	327.606	320.842	341.876	protein_coding
XLOC_036267	NA	265.774	587.132	149.182	158.839	324.679	152.306	152.863	263.077	55.219	24.1438	lincRNA
XLOC_036268	NA	236.447	297.047	112.775	120.676	202.924	80.3838	67.1106	116.151	26.6575	8.69177	lincRNA
XLOC_036281	Mxd4	17.4128	19.7258	49.7274	72.1994	57.2351	136.441	214.381	232.302	247.534	354.431	protein_coding
XLOC_036314	Msx1	2.74938	6.96204	2.66397	8.25136	19.7721	60.2878	436.219	365.33	203.739	309.041	protein_coding
XLOC_036321	Nsg1	6.41523	3.48102	23.0877	60.8538	17.6908	32.7881	198.535	170.752	400.814	634.499	protein_coding
XLOC_036333	Hs3st1	1.83292	3.48102	7.10392	6.18852	9.36574	7.40377	82.024	18.8622	86.6368	34.7671	protein_coding
XLOC_036353	Fgfbp1	4.58231	8.12237	40.8475	130.99	88.4542	87.7875	24.2344	16.8767	19.041	22.2123	protein_coding
XLOC_036354	Prom1	93.4791	146.203	229.989	795.225	889.746	844.029	1371.11	1224.05	1236.72	1163.73	protein_coding
XLOC_036394	Sel1l3	0	0	15.9838	92.8278	140.486	208.363	301.998	211.455	153.28	81.1232	protein_coding
XLOC_036466	Phox2b	0	0	0	0	0	0	36.3516	78.4269	58.0752	29.9383	protein_coding
XLOC_036525	Kdr	1.83292	6.96204	6.21593	3.09426	31.2191	96.249	90.4129	353.417	86.6368	428.794	protein_coding
XLOC_036529	Pdcl2	136.553	95.1478	31.0796	16.5027	11.447	4.23072	0.932091	0.992745	0	0.965752	protein_coding
XLOC_036562	Epha5	0	0	1.77598	5.1571	4.16255	3.17304	12.1172	20.8476	82.8286	127.479	protein_coding
XLOC_036577	Ugt2b34	0	1.16034	0	0	5.20319	6.34609	219.974	46.659	170.417	17.3835	protein_coding
XLOC_036601	Gc	64.1523	30.1688	225.549	130.99	37.463	21.1536	8.38882	7.94196	2.85616	2.89726	protein_coding
XLOC_036602	Adamts3	7.33169	11.6034	7.10392	23.7227	46.8287	66.6339	57.7897	91.3325	78.0683	71.4657	protein_coding
XLOC_036619	Cdkl2	14.6634	20.8861	178.486	96.9535	59.3164	99.422	23.3023	14.8912	9.52052	7.72602	protein_coding
XLOC_036669	Antxr2	0	2.32068	5.32794	34.0369	47.8694	113.172	177.097	306.758	580.752	821.855	protein_coding
XLOC_036696	Plac8	3.66585	1.16034	271.725	167.09	66.6008	74.0377	65.2464	11.9129	80.9245	19.315	protein_coding
XLOC_036705	Nkx6-1	1.83292	0	0	0	1.04064	19.0383	11.1851	33.7533	60.9314	55.0479	protein_coding
XLOC_036722	Sparcl1	2.74938	3.48102	1.77598	0	1.04064	6.34609	4.66046	22.8331	45.6985	197.013	protein_coding
XLOC_036750	Gm17304	26.5774	33.6498	50.6154	79.4193	297.622	251.728	258.189	450.706	189.458	235.644	protein_coding
XLOC_036759	Tgfbr3	79.7322	70.7807	20.4238	40.2254	152.974	740.377	736.352	533.104	761.642	381.472	protein_coding
XLOC_036793	Crlf2	427.071	301.688	87.023	68.0737	54.1132	47.5956	76.4315	32.7606	75.2121	32.8356	protein_coding
XLOC_036848	Miat	0.916462	5.8017	77.2551	281.578	404.808	119.518	506.126	724.704	3812.02	4927.27	lincRNA
XLOC_036852	Asphd2	11.914	11.6034	71.0392	150.587	131.12	84.6145	147.27	144.941	156.137	161.281	protein_coding
XLOC_036874	Tmem119	0	0	7.10392	14.4399	13.5283	50.7687	38.2157	108.209	45.6985	194.116	protein_coding
XLOC_036926	Hspb8	1979.56	1696.42	530.13	366.154	196.681	230.574	126.764	69.4921	145.664	125.548	protein_coding
XLOC_036927	Srrm4	10.9975	3.48102	7.10392	7.21994	15.6096	11.6345	20.506	50.63	146.616	277.171	protein_coding
XLOC_036982	Dtx1	537.963	550.001	312.572	322.834	306.988	222.113	56.8576	41.6953	49.5067	29.9383	protein_coding
XLOC_037113	NA	2.74938	6.96204	3.55196	10.3142	103.023	96.249	81.0919	212.447	210.404	243.37	lincRNA
XLOC_037114	NA	0	2.32068	0.88799	2.06284	20.8128	27.4997	21.4381	42.688	57.1231	72.4314	lincRNA
XLOC_037116	NA	0.916462	4.64136	3.55196	2.06284	48.91	60.2878	29.8269	98.2818	87.5888	99.4725	lincRNA
XLOC_037118	NA	4.58231	23.2068	25.7517	25.7855	224.778	224.228	167.776	429.859	372.252	484.808	lincRNA
XLOC_037119	NA	1.83292	2.32068	5.32794	5.1571	82.2104	116.345	68.9748	184.651	171.369	173.835	lincRNA
XLOC_037120	NA	0	3.48102	7.10392	5.1571	57.2351	47.5956	32.6232	100.267	96.1573	114.925	lincRNA
XLOC_037121	NA	0	9.28271	7.99191	13.4085	77.0072	76.153	54.9934	144.941	126.623	187.356	lincRNA
XLOC_037122	NA	9.16462	32.4895	33.7436	44.351	308.029	313.074	197.603	517.22	557.903	671.198	lincRNA
XLOC_037123	NA	0.916462	3.48102	0.88799	6.18852	60.357	56.0571	36.3516	118.137	88.5409	144.863	lincRNA
XLOC_037124	NA	2.74938	9.28271	10.6559	14.4399	127.998	127.979	78.2957	238.259	226.588	273.308	lincRNA
XLOC_037125	NA	5.49877	13.9241	23.9757	25.7855	178.99	169.229	122.104	345.475	330.362	382.438	lincRNA
XLOC_037187	Clip2	56.8206	90.5065	150.07	243.415	284.094	343.746	301.066	424.895	448.417	653.814	protein_coding
XLOC_037204	Fkbp6	278.604	304.009	263.733	86.6393	29.1379	7.40377	19.5739	10.9202	11.4246	13.5205	protein_coding
XLOC_037227	Sh2b2	11.914	19.7258	32.8556	62.9166	46.8287	44.4226	96.9375	131.042	145.664	141.966	protein_coding
XLOC_037231	Col26a1	43.0737	90.5065	15.0958	17.5341	15.6096	12.6922	221.838	261.092	427.472	514.746	protein_coding
XLOC_037265	Zfp113	109.975	85.8651	99.4548	126.865	176.908	190.383	442.743	481.481	470.314	596.835	protein_coding
XLOC_037284	Pdgfa	943.955	643.988	261.957	216.598	79.0885	181.921	173.369	111.187	141.856	125.548	protein_coding
XLOC_037286	Adap1	359.253	203.059	333.884	287.766	75.9666	40.1919	46.6046	26.8041	23.8013	18.3493	protein_coding
XLOC_037305	Ttyh3	23.828	31.3292	89.6869	173.279	458.921	489.706	505.194	797.174	604.553	591.04	protein_coding
XLOC_037314	Radil	68.7346	95.1478	83.471	151.619	196.681	151.248	42.8762	18.8622	21.8972	21.2466	protein_coding
XLOC_037318	Tnrc18	474.727	482.701	107.447	80.4507	233.103	392.4	655.26	828.942	615.026	731.075	protein_coding
XLOC_037396	Flt1	4.58231	6.96204	13.3198	47.4453	178.99	2251.8	703.729	620.466	530.293	413.342	protein_coding
XLOC_037406	Katnal1	36.6585	84.7048	30.1916	12.377	85.3323	83.5568	150.999	180.68	268.479	300.349	protein_coding
XLOC_037441	Stard13	3.66585	6.96204	33.7436	60.8538	50.9913	46.538	82.024	91.3325	119.959	130.377	protein_coding
XLOC_037473	Col1a2	8.24815	1.16034	2.66397	10.3142	53.0725	47.5956	535.953	276.976	505.54	372.78	protein_coding
XLOC_037474	Casd1	169.545	84.7048	211.342	257.855	259.119	315.189	1124.1	1153.57	1217.68	1225.54	protein_coding
XLOC_037476	Peg10	48.5725	49.8946	7047.97	8837.2	4573.6	7700.97	15200.5	17399.8	15577.5	9821.7	protein_coding
XLOC_037481	Asb4	10.0811	2.32068	8.8799	12.377	19.7721	124.806	103.462	136.999	316.081	221.157	protein_coding
XLOC_037546	Met	91.6462	113.713	78.1431	273.326	408.971	360.669	753.13	950.057	411.287	333.185	protein_coding
XLOC_037574	Ptprz1	7.33169	9.28271	29.3037	41.2568	97.82	61.3455	119.308	128.064	69.4998	88.8492	protein_coding
XLOC_037605	Flnc	21.9951	74.2617	236.205	539.433	1014.62	1129.6	1016.91	801.145	974.902	1520.09	protein_coding
XLOC_037654	Akr1b8	51.3218	26.6878	485.73	243.415	67.6415	87.7875	19.5739	8.9347	12.3767	9.65752	protein_coding
XLOC_037662	Tmem140	0.916462	2.32068	0.88799	2.06284	4.16255	8.46145	77.3636	27.7969	19.041	9.65752	protein_coding
XLOC_037663	Stra8	12.8305	20.8861	47.0634	14.4399	7.28447	1.05768	1678.7	595.647	592.177	337.048	protein_coding
XLOC_037779	Zyx	10.9975	27.8481	146.518	278.483	405.849	631.436	401.731	556.93	412.239	429.76	protein_coding
XLOC_037803	Arhgef5	32.9926	32.4895	110.999	172.247	198.762	343.746	377.497	315.693	324.65	251.096	protein_coding
XLOC_037855	Tmem176a	0.916462	3.48102	0	2.06284	3.12191	52.884	41.9441	31.7678	45.6985	79.1917	protein_coding
XLOC_037862	Gpnmb	175.961	177.532	15.9838	14.4399	14.5689	7.40377	0	0	1.9041	0	protein_coding
XLOC_037869	Stk31	294.184	317.933	148.294	79.4193	54.1132	14.8075	62.4501	32.7606	24.7534	12.5548	protein_coding
XLOC_037918	Wipf3	0.916462	8.12237	36.4076	85.6078	119.673	103.653	23.3023	24.8186	20.9452	10.6233	protein_coding
XLOC_037986	Ccser1	27.4938	37.1309	6.21593	3.09426	5.20319	2.11536	46.6046	27.7969	106.63	111.062	protein_coding
XLOC_037998	Ndnf	2.74938	3.48102	71.0392	17.5341	27.0566	14.8075	129.561	137.992	462.697	342.842	protein_coding
XLOC_038081	Foxi3	0.916462	5.8017	198.91	424.945	414.174	268.651	3.72837	0.992745	0.952052	0	protein_coding
XLOC_038095	Rnf103	60.4865	64.979	46.1755	113.456	185.234	227.401	347.67	297.823	327.506	366.986	protein_coding
XLOC_038100	Reep1	35.742	71.941	30.1916	62.9166	67.6415	93.0759	315.047	279.954	383.677	389.198	protein_coding
XLOC_038113	Capg	186.958	207.701	395.155	593.066	297.622	263.363	82.024	50.63	56.1711	30.9041	protein_coding
XLOC_038144	M1ap	435.319	508.229	91.4629	57.7595	53.0725	26.442	27.9627	3.97098	7.61642	5.79451	protein_coding
XLOC_038158	Slc4a5	144.801	140.401	148.294	109.33	82.2104	78.2684	23.3023	40.7025	8.56847	19.315	protein_coding
XLOC_038175	Dysf	21.9951	30.1688	150.958	270.232	304.907	292.978	178.029	144.941	104.726	93.678	protein_coding
XLOC_038198	Add2	0	2.32068	2.66397	20.6284	17.6908	33.8458	10.253	49.6372	191.363	333.185	protein_coding
XLOC_038211	Nfu1	1296.79	719.41	1084.24	762.219	247.672	258.074	205.06	188.622	190.41	150.657	protein_coding
XLOC_038219	Efcc1	2.74938	9.28271	1.77598	2.06284	3.12191	6.34609	75.4994	157.846	454.129	444.246	protein_coding
XLOC_038224	Hmces	1272.05	732.174	4045.68	1355.29	290.338	345.862	259.121	232.302	256.102	197.013	protein_coding
XLOC_038264	Aldh1l1	1930.07	1682.49	109.223	118.613	85.3323	157.594	24.2344	17.8694	15.2328	2.89726	protein_coding
XLOC_038281	Fgd5	22.9115	42.9325	174.046	218.661	219.575	260.19	61.518	75.4486	44.7465	64.7054	protein_coding
XLOC_038359	Lrrn1	3.66585	2.32068	20.4238	72.1994	190.437	112.114	156.591	155.861	282.76	465.493	protein_coding
XLOC_038438	8430408G22Rik	0	0	0	0	1.04064	1.05768	109.055	71.4776	62.8355	46.3561	protein_coding
XLOC_038442	Cxcl12	4.58231	1.16034	36.4076	121.708	340.289	296.151	37.2837	116.151	87.5888	207.637	protein_coding
XLOC_038485	Slc6a13	0	1.16034	6.21593	2.06284	11.447	3.17304	53.1292	22.8331	64.7396	25.1096	protein_coding
XLOC_038499	Mfap5	58.6535	46.4136	70.1512	42.2882	8.3251	5.2884	5.59255	5.95647	3.80821	1.9315	protein_coding
XLOC_038502	Dppa3	2187.59	1264.77	667.768	851.953	173.787	118.46	95.0733	48.6445	23.8013	5.79451	protein_coding
XLOC_038505	Nanog	6800.14	5794.73	2000.64	1418.2	931.371	1632	164.98	218.404	69.4998	59.8766	protein_coding
XLOC_038587	Tspan11	0	0	1.77598	5.1571	4.16255	4.23072	4.66046	5.95647	23.8013	138.103	protein_coding
XLOC_038654	Bcl2l14	73.3169	87.0254	28.4157	34.0369	15.6096	13.7499	9.32091	0.992745	2.85616	1.9315	protein_coding
XLOC_038692	Mgst1	3.66585	4.64136	29.3037	58.7909	52.0319	58.1725	119.308	89.347	165.657	204.74	protein_coding
XLOC_038708	Pde3a	0	6.96204	15.9838	21.6598	39.5442	103.653	133.289	146.926	119.007	79.1917	protein_coding
XLOC_038742	Tuba3b	167.712	198.418	136.75	20.6284	15.6096	4.23072	35.4195	5.95647	9.52052	1.9315	protein_coding
XLOC_038808	Sgce	8.24815	10.4431	60.3833	139.242	147.771	157.594	557.391	368.308	615.978	470.321	protein_coding
XLOC_038815	Pdk4	71.484	161.287	87.911	62.9166	109.267	38.0765	15.8456	12.9057	16.1849	3.86301	protein_coding
XLOC_038836	Asns	20495.7	18671	3092.87	2505.32	1298.72	1736.71	1257.39	900.42	1353.82	1539.41	protein_coding
XLOC_038858	Thsd7a	0	1.16034	5.32794	34.0369	137.364	443.168	38.2157	81.4051	270.383	510.883	protein_coding
XLOC_038897	Tspan12	10.0811	6.96204	13.3198	66.0109	58.2757	92.0182	279.627	345.475	306.561	342.842	protein_coding
XLOC_038905	Aass	17.4128	25.5275	218.445	171.216	265.363	109.999	122.104	65.5212	46.6506	27.0411	protein_coding
XLOC_038940	Lrrc4	3.66585	6.96204	15.9838	23.7227	22.894	56.0571	53.1292	54.601	103.774	137.137	protein_coding
XLOC_038991	Podxl	109.059	129.958	293.925	693.114	1836.73	2515.17	3026.5	2399.46	2403.93	1437.04	protein_coding
XLOC_038994	Plxna4	0.916462	0	22.1997	11.3456	2.08128	23.269	40.0799	80.4123	161.849	165.144	protein_coding
XLOC_039007	Akr1b3	1156.57	975.845	3892.95	2612.59	690.984	965.663	651.532	471.554	452.225	484.808	protein_coding
XLOC_039023	Slc13a4	3.66585	10.4431	15.9838	11.3456	31.2191	34.9035	238.615	71.4776	60.9314	20.2808	protein_coding
XLOC_039028	Ptn	2.74938	1.16034	17.7598	38.1625	22.894	24.3267	491.212	467.583	209.452	384.369	protein_coding
XLOC_039034	Creb3l2	208.037	295.886	35.5196	47.4453	109.267	112.114	409.188	460.634	428.424	420.102	protein_coding
XLOC_039040	Zc3hav1	3136.13	3513.51	577.193	637.417	321.557	736.146	322.504	291.867	200.883	139.068	protein_coding
XLOC_039046	Hipk2	85.2309	163.608	118.991	271.263	559.863	810.184	1819.44	3117.22	2196.38	2356.44	protein_coding
XLOC_039047	Parp12	41.2408	59.1773	468.858	380.594	206.046	144.902	46.6046	20.8476	29.5136	25.1096	protein_coding
XLOC_039048	Jhdm1d	284.103	530.275	506.154	471.359	1262.29	1278.74	1616.25	1547.69	2696.21	2319.74	protein_coding
XLOC_039055	Rab19	9.16462	9.28271	32.8556	30.9426	106.145	37.0188	3.72837	10.9202	6.66437	4.82876	protein_coding
XLOC_039056	Mkrn1	4120.41	3469.41	16062.8	9518.97	7250.13	4926.68	1149.27	767.392	825.429	749.424	protein_coding
XLOC_039086	Fam131b	0	0	62.1593	137.179	155.055	170.287	41.012	48.6445	77.1162	115.89	protein_coding
XLOC_039089	Epha1	4.58231	8.12237	332.996	395.034	622.302	1535.75	163.116	125.086	108.534	55.0479	protein_coding
XLOC_039097	Fam115a	48.5725	39.4515	66.5992	167.09	283.054	524.61	856.592	988.774	1252.9	1667.85	protein_coding
XLOC_039138	Tmem176b	0.916462	1.16034	1.77598	3.09426	7.28447	22.2113	33.5553	33.7533	34.2739	112.993	protein_coding
XLOC_039212	Tril	2.74938	0	4.43995	2.06284	9.36574	8.46145	62.4501	94.3108	111.39	258.822	protein_coding
XLOC_039230	Pde1c	3.66585	6.96204	10.6559	33.0054	49.9506	80.3838	28.8948	40.7025	68.5478	80.1574	protein_coding
XLOC_039245	Vopp1	82.4815	91.6668	33.7436	95.922	90.5355	166.056	473.502	560.901	721.656	771.636	protein_coding
XLOC_039396	Atoh8	0.916462	0	0.88799	1.03142	2.08128	3.17304	129.561	122.108	123.767	117.822	protein_coding
XLOC_039494	Cyp26b1	0	5.8017	4.43995	8.25136	7.28447	5.2884	1020.64	2960.37	3642.55	8479.31	protein_coding
XLOC_039529	Antxr1	7.33169	17.4051	23.9757	67.0423	126.958	113.172	72.7031	187.629	137.096	260.753	protein_coding
XLOC_039543	H1fx	56.8206	49.8946	103.007	86.6393	172.746	177.69	268.442	323.635	380.821	344.774	protein_coding
XLOC_039554	Podxl2	7.33169	12.7637	17.7598	9.28278	20.8128	8.46145	86.6845	101.26	198.979	240.472	protein_coding
XLOC_039615	Wnt7a	0	2.32068	0	4.12568	3.12191	3.17304	9.32091	2.97823	103.774	56.0136	protein_coding
XLOC_039628	Trh	322.594	134.599	622.481	660.109	1172.8	5856.38	22.3702	19.8549	7.61642	8.69177	protein_coding
XLOC_039629	Prickle2	185.125	208.861	36.4076	56.7281	157.136	147.018	308.522	434.822	638.827	750.39	protein_coding
XLOC_039632	Adamts9	483.892	654.431	558.545	310.457	615.017	4333.32	772.704	664.146	807.34	934.848	protein_coding
XLOC_039656	Fam19a4	9.16462	15.0844	55.0554	31.974	17.6908	21.1536	0	1.98549	0	0	protein_coding
XLOC_039696	Pdzrn3	106.31	121.836	53.2794	136.147	284.094	494.995	1771.91	1626.12	1205.3	1363.64	protein_coding
XLOC_039716	NA	86.1474	97.4685	30.1916	19.597	70.7634	25.3843	2.79627	4.96372	0	0	lincRNA
XLOC_039745	Lhfpl4	8.24815	19.7258	10.6559	37.1311	42.6662	68.7493	49.4008	81.4051	108.534	147.76	protein_coding
XLOC_039762	Vgll4	119.14	125.317	150.07	157.807	75.9666	196.729	437.151	454.677	512.204	731.075	protein_coding
XLOC_039772	Tmem40	87.0638	24.3671	89.6869	60.8538	13.5283	25.3843	0	0.992745	2.85616	0	protein_coding
XLOC_039777	Plxnd1	11.914	24.3671	39.0715	35.0683	131.12	143.845	146.338	401.069	174.226	509.917	protein_coding
XLOC_039782	Alox5	0.916462	4.64136	47.9514	101.079	32.2598	23.269	9.32091	2.97823	2.85616	1.9315	protein_coding
XLOC_039784	Zfp422	118.224	109.072	118.991	154.713	155.055	182.979	418.509	550.973	554.094	733.972	protein_coding
XLOC_039802	Ret	4.58231	18.5654	36.4076	39.194	44.7474	69.8069	188.282	193.585	241.821	190.253	protein_coding
XLOC_039806	Zfp9	13.7469	24.3671	7.99191	8.25136	11.447	9.51913	133.289	211.455	218.02	323.527	protein_coding
XLOC_039809	Cacna1c	7.33169	19.7258	0.88799	5.1571	15.6096	15.8652	56.8576	70.4849	106.63	116.856	protein_coding
XLOC_039834	B4galnt3	861.474	829.643	1051.38	874.644	397.524	391.342	166.844	130.05	119.959	62.7739	protein_coding
XLOC_039860	Apobec1	83.398	158.966	70.1512	47.4453	27.0566	13.7499	6.52464	4.96372	7.61642	3.86301	protein_coding
XLOC_039861	Gdf3	1440.68	736.815	1002.54	1217.08	178.99	181.921	22.3702	31.7678	4.76026	5.79451	protein_coding
XLOC_039898	Ptpn6	347.339	334.178	392.491	324.897	187.315	252.786	96.9375	68.4994	49.5067	25.1096	protein_coding
XLOC_039900	Eno2	97.1449	169.41	116.327	43.3196	778.397	530.956	381.225	175.716	760.69	499.294	protein_coding
XLOC_039926	Tuba3a	362.002	430.486	116.327	43.3196	43.7068	21.1536	35.4195	15.8839	14.2808	11.589	protein_coding
XLOC_039932	Cd9	3858.3	3749.06	1569.08	1077.83	539.051	543.648	429.694	293.853	337.979	215.363	protein_coding
XLOC_039945	9630033F20Rik	1705.53	1069.83	795.639	515.71	221.656	257.016	140.746	142.955	99.9655	115.89	protein_coding
XLOC_039946	Ccnd2	1.83292	3.48102	25.7517	29.9112	61.3976	159.71	4534.62	8026.34	9026.41	9063.59	protein_coding
XLOC_039951	Prmt8	18.3292	31.3292	10.6559	5.1571	12.4877	10.5768	20.506	21.8404	155.185	209.568	protein_coding
XLOC_039957	Tead4	1155.66	1587.34	402.259	259.918	120.714	186.152	168.709	126.079	117.102	64.7054	protein_coding
XLOC_040110	St8sia1	2.74938	2.32068	21.3117	26.8169	21.8534	22.2113	460.453	401.069	542.67	490.602	protein_coding
XLOC_040189	Bhlhe41	15.5798	64.979	60.3833	42.2882	469.328	347.977	50.3329	59.5647	144.712	71.4657	protein_coding
XLOC_040256	Cacng7	17.4128	23.2068	194.47	215.567	258.078	152.306	144.474	150.897	157.089	188.322	protein_coding
XLOC_040260	Cacng6	58.6535	167.089	96.7909	86.6393	134.242	95.1913	37.2837	13.8984	8.56847	5.79451	protein_coding
XLOC_040289	Ssc5d	2.74938	0	5.32794	11.3456	36.4223	33.8458	48.4688	61.5502	55.219	51.1849	protein_coding
XLOC_040309	Gm6792	205.287	60.3376	90.5749	74.2622	58.2757	48.6533	9.32091	16.8767	0.952052	1.9315	protein_coding
XLOC_040341	Aurkc	83.398	116.034	10.6559	3.09426	3.12191	2.11536	9.32091	7.94196	4.76026	6.76027	protein_coding
XLOC_040470	Ccdc8	169.545	119.515	53.2794	81.4822	138.405	196.729	245.14	399.083	427.472	527.301	protein_coding
XLOC_040498	Six5	44.9066	46.4136	26.6397	15.4713	71.804	88.8452	282.424	273.998	379.869	352.5	protein_coding
XLOC_040517	Zfp296	151.216	156.646	133.198	80.4507	45.7881	37.0188	18.6418	10.9202	8.56847	3.86301	protein_coding
XLOC_040581	Cadm4	480.226	610.338	55.9433	49.5081	36.4223	79.3261	133.289	136.999	239.917	346.705	protein_coding
XLOC_040657	Blvrb	718.506	606.857	372.956	347.588	392.321	297.208	105.326	75.4486	89.4929	68.5684	protein_coding
XLOC_040678	Dyrk1b	74.2334	110.232	126.095	176.373	424.58	455.86	620.773	927.224	773.067	833.444	protein_coding
XLOC_040690	Gmfg	249.278	256.435	152.734	172.247	84.2917	123.749	51.265	22.8331	12.3767	24.1438	protein_coding
XLOC_040695	Fbxo17	158.548	109.072	261.957	178.436	79.0885	67.6916	41.012	33.7533	24.7534	25.1096	protein_coding
XLOC_040699	Rinl	233.698	95.1478	261.069	146.462	47.8694	44.4226	11.1851	15.8839	11.4246	1.9315	protein_coding
XLOC_040736	Clip3	3.66585	6.96204	63.9352	87.6707	257.038	161.825	147.27	306.758	285.616	290.691	protein_coding
XLOC_040757	Lsr	24.7445	10.4431	12.4319	11.3456	64.5196	86.7298	100.666	105.231	119.007	126.514	protein_coding
XLOC_040835	Tshz3	38.4914	32.4895	28.4157	34.0369	38.5036	19.0383	361.651	637.342	676.909	750.39	protein_coding
XLOC_040837	NA	0	1.16034	0	1.03142	2.08128	1.05768	21.4381	32.7606	30.4657	28.9726	lincRNA
XLOC_040838	NA	1.83292	8.12237	0	0	6.24383	2.11536	41.012	54.601	57.1231	58.9109	lincRNA
XLOC_040887	Vstm2b	0	0	7.10392	16.5027	6.24383	24.3267	47.5367	69.4921	112.342	83.0547	protein_coding
XLOC_040917	Gm10351	465.562	422.363	610.937	395.034	231.022	154.421	79.2278	54.601	28.5616	8.69177	protein_coding
XLOC_040939	Ceacam18	504.054	265.718	417.355	261.981	79.0885	98.3643	24.2344	19.8549	17.1369	16.4178	protein_coding
XLOC_040976	Lrrc4b	0	0	3.55196	4.12568	16.6502	21.1536	63.3822	50.63	135.191	241.438	protein_coding
XLOC_041004	Hrc	16.4963	58.017	4.43995	7.21994	97.82	83.5568	41.9441	47.6518	57.1231	26.0753	protein_coding
XLOC_041011	Tulp2	84.3145	81.2237	55.9433	29.9112	18.7315	14.8075	8.38882	3.97098	10.4726	3.86301	protein_coding
XLOC_041013	Hsd17b14	243.779	116.034	511.482	148.524	33.3004	38.0765	13.9814	6.94921	5.71231	0	protein_coding
XLOC_041014	Bcat2	866.973	659.073	1368.39	998.414	549.457	615.57	151.931	153.875	124.719	87.8835	protein_coding
XLOC_041018	Rasip1	276.771	169.41	306.356	288.798	92.6168	75.0953	41.9441	70.4849	28.5616	88.8492	protein_coding
XLOC_041035	Kcnc1	0.916462	2.32068	0	0	8.3251	51.8264	8.38882	9.92745	49.5067	45.3904	protein_coding
XLOC_041040	Ldhc	12.8305	30.1688	75.4791	39.194	14.5689	15.8652	3.72837	1.98549	0	0	protein_coding
XLOC_041054	Htatip2	209.87	171.73	100.343	78.3879	35.3817	32.7881	44.7404	16.8767	29.5136	16.4178	protein_coding
XLOC_041058	Slc6a5	0.916462	1.16034	0.88799	0	0	1.05768	0	0	51.4108	89.815	protein_coding
XLOC_041059	Nell1	0.916462	3.48102	6.21593	3.09426	6.24383	1.05768	82.024	72.4704	86.6368	55.0479	protein_coding
XLOC_041090	Ndn	46.7395	51.0549	93.2389	144.399	157.136	197.786	495.873	585.72	574.088	712.725	protein_coding
XLOC_041091	Magel2	0.916462	0	23.9757	50.5396	113.43	114.23	64.3143	87.3616	33.3218	31.8698	protein_coding
XLOC_041108	Apba2	9.16462	30.1688	39.0715	101.079	87.4136	69.8069	343.942	539.061	986.326	1172.42	protein_coding
XLOC_041127	Adamts17	7.33169	5.8017	11.5439	17.5341	31.2191	11.6345	155.659	207.484	242.773	217.294	protein_coding
XLOC_041131	Igf1r	291.435	605.697	618.041	889.084	2392.43	2327.96	2827.97	3091.41	3566.39	2867.32	protein_coding
XLOC_041132	Fam169b	192.457	228.587	34.6316	35.0683	29.1379	23.269	9.32091	7.94196	3.80821	0.965752	lincRNA
XLOC_041200	Rgma	48.5725	45.2532	7.99191	13.4085	80.1291	64.5185	169.641	242.23	202.787	253.993	protein_coding
XLOC_041225	Acan	36.6585	69.6204	235.317	226.912	143.608	81.4414	51.265	20.8476	18.089	9.65752	protein_coding
XLOC_041252	Zscan2	27.4938	34.8102	13.3198	8.25136	47.8694	61.3455	112.783	142.955	145.664	183.493	protein_coding
XLOC_041256	Alpk3	458.231	433.967	103.895	74.2622	118.633	50.7687	114.647	118.137	71.4039	51.1849	protein_coding
XLOC_041257	Slc28a1	307.015	134.599	156.286	97.9849	28.0972	24.3267	8.38882	12.9057	3.80821	2.89726	protein_coding
XLOC_041260	Pde8a	479.309	518.672	68.3752	27.8483	67.6415	27.4997	33.5553	32.7606	18.089	24.1438	protein_coding
XLOC_041274	Mex3b	95.312	75.422	70.1512	99.0163	46.8287	42.3072	506.126	667.125	537.91	701.136	protein_coding
XLOC_041336	Fzd4	21.9951	61.498	65.7112	74.2622	139.446	77.2107	836.086	888.507	517.916	451.972	protein_coding
XLOC_041372	Gab2	16.4963	30.1688	5.32794	29.9112	49.9506	30.6727	96.0054	139.977	198.027	248.198	protein_coding
XLOC_041408	Gdpd5	8.24815	19.7258	21.3117	31.974	63.4789	122.691	453.928	432.837	806.388	845.999	protein_coding
XLOC_041425	Ucp2	1024.6	791.351	314.348	306.332	420.418	602.878	151.931	160.825	104.726	104.301	protein_coding
XLOC_041519	Trim6	3133.38	2545.78	2785.62	1898.84	1022.95	936.048	411.052	224.36	218.02	92.7122	protein_coding
XLOC_041520	Trim34a	173.211	155.485	123.431	86.6393	113.43	82.4991	57.7897	18.8622	24.7534	11.589	protein_coding
XLOC_041564	Nlrp14	16.4963	12.7637	96.7909	43.3196	19.7721	4.23072	1.86418	0	0	0.965752	protein_coding
XLOC_041565	Rbmxl2	1984.14	1257.81	1778.64	1001.51	429.784	296.151	103.462	86.3688	19.9931	13.5205	protein_coding
XLOC_041566	NA	63.2358	52.2153	292.149	159.87	98.8606	46.538	14.9135	34.7461	4.76026	3.86301	lincRNA
XLOC_041567	NA	28.4103	32.4895	155.398	88.7021	48.91	24.3267	9.32091	11.9129	0	0	lincRNA
XLOC_041568	Gm15514	56.8206	44.0929	55.9433	13.4085	9.36574	6.34609	1.86418	5.95647	0.952052	2.89726	lincRNA
XLOC_041622	Adm	0.916462	5.8017	28.4157	10.3142	227.9	193.556	41.9441	34.7461	85.6847	96.5752	protein_coding
XLOC_041623	Ampd3	68.7346	161.287	72.8151	20.6284	37.463	10.5768	13.9814	13.8984	11.4246	13.5205	protein_coding
XLOC_041633	Mical2	3.66585	10.4431	7.10392	14.4399	18.7315	21.1536	75.4994	107.216	199.931	144.863	protein_coding
XLOC_041649	Spon1	0.916462	1.16034	64.8232	214.535	724.284	226.344	91.345	120.122	91.397	126.514	protein_coding
XLOC_041735	Slc5a11	83.398	61.498	160.726	133.053	29.1379	16.9229	4.66046	0	0.952052	1.9315	protein_coding
XLOC_041737	Aqp8	54.0712	38.2912	1.77598	1.03142	64.5196	17.9806	87.6166	23.8259	87.5888	18.3493	protein_coding
XLOC_041774	Fam57b	2.74938	6.96204	22.1997	38.1625	109.267	66.6339	9.32091	6.94921	27.6095	30.9041	protein_coding
XLOC_041778	Sez6l2	1.83292	5.8017	15.9838	23.7227	59.3164	72.98	37.2837	24.8186	67.5957	93.678	protein_coding
XLOC_041782	AI467606	141.135	82.3841	40.8475	24.7541	12.4877	9.51913	2.79627	2.97823	0.952052	0.965752	protein_coding
XLOC_041807	Hsd3b7	344.59	349.262	155.398	103.142	74.9259	49.711	83.8882	43.6808	57.1231	36.6986	protein_coding
XLOC_041887	Dpysl4	15.5798	6.96204	27.5277	48.4767	40.5849	27.4997	123.036	179.687	332.266	620.979	protein_coding
XLOC_041894	Kndc1	21.0786	16.2447	198.022	153.682	133.202	49.711	26.0986	20.8476	8.56847	7.72602	protein_coding
XLOC_041895	Utf1	230.032	301.688	1461.63	1291.34	1297.68	695.954	43.8083	36.7316	15.2328	6.76027	protein_coding
XLOC_041923	Urah	116.391	131.118	272.613	143.367	30.1785	23.269	4.66046	1.98549	4.76026	0.965752	protein_coding
XLOC_041932	Ifitm1	1336.2	525.634	562.097	1078.87	145.689	373.361	82.9561	176.709	55.219	121.685	protein_coding
XLOC_041973	Lsp1	2.74938	2.32068	7.10392	5.1571	15.6096	8.46145	47.5367	52.6155	39.0341	143.897	protein_coding
XLOC_041998	Fgf4	4430.18	4647.16	4402.65	2501.19	1718.09	607.109	52.1971	51.6227	19.9931	8.69177	protein_coding
XLOC_042000	Fgf15	0	3.48102	63.0473	79.4193	181.071	66.6339	120.24	102.253	45.6985	36.6986	protein_coding
XLOC_042007	AU018091	914.629	1158.02	1134.85	873.613	306.988	233.747	143.542	147.919	56.1711	25.1096	protein_coding
XLOC_042011	Tarm1	40.3243	54.5359	18.6478	0	41.6255	9.51913	2.79627	3.97098	3.80821	0	protein_coding
XLOC_042044	Tnnt1	57.7371	74.2617	70.1512	55.6967	46.8287	34.9035	3.72837	4.96372	2.85616	11.589	protein_coding
XLOC_042055	Tmem238	76.0663	49.8946	64.8232	93.8592	55.1538	65.5762	8.38882	9.92745	7.61642	8.69177	protein_coding
XLOC_042064	Zfp579	4.58231	4.64136	7.99191	24.7541	19.7721	32.7881	46.6046	60.5574	68.5478	97.541	protein_coding
XLOC_042100	Zim1	5.49877	15.0844	47.9514	28.8798	33.3004	30.6727	594.674	720.733	1312.88	835.376	protein_coding
XLOC_042297	Ehd2	1.83292	0	20.4238	37.1311	23.9347	38.0765	67.1106	68.4994	57.1231	113.959	protein_coding
XLOC_042298	Gltscr1	43.0737	68.46	63.9352	86.6393	349.654	279.228	250.733	462.619	357.02	291.657	protein_coding
XLOC_042325	Hif3a	6.41523	23.2068	52.3914	57.7595	210.209	218.94	128.629	88.3543	149.472	81.1232	protein_coding
XLOC_042351	Ppm1n	56.8206	45.2532	59.4953	52.6024	37.463	24.3267	6.52464	3.97098	1.9041	1.9315	protein_coding
XLOC_042353	Fosb	3.66585	2.32068	54.1674	165.027	77.0072	161.825	204.128	309.736	112.342	323.527	protein_coding
XLOC_042363	Relb	974.199	720.571	133.198	136.147	96.7793	160.768	105.326	75.4486	64.7396	37.6643	protein_coding
XLOC_042365	Apoc2	20.1622	6.96204	9.76789	2.06284	10.4064	0	111.851	11.9129	28.5616	6.76027	protein_coding
XLOC_042367	Apoe	18992.7	13243	20165.4	12645.2	7189.77	6535.41	6079.1	2293.24	2338.24	1211.05	protein_coding
XLOC_042372	Bcl3	230.032	228.587	119.879	50.5396	37.463	9.51913	20.506	24.8186	40.9383	42.4931	protein_coding
XLOC_042474	Grik5	30.2432	51.0549	54.1674	93.8592	272.647	306.727	455.793	625.429	663.581	495.431	protein_coding
XLOC_042499	Axl	5.49877	12.7637	24.8637	40.2254	63.4789	99.422	139.814	183.658	195.171	379.541	protein_coding
XLOC_042506	Cyp2b23	12.8305	15.0844	48.8394	54.6652	40.5849	32.7881	2.79627	3.97098	0	0	protein_coding
XLOC_042527	Dll3	1.83292	2.32068	75.4791	141.305	100.942	206.248	35.4195	40.7025	166.609	229.849	protein_coding
XLOC_042548	Spred3	16.4963	11.6034	60.3833	139.242	234.144	240.094	43.8083	114.166	80.9245	94.6437	protein_coding
XLOC_042579	Kirrel2	66.9017	35.9705	179.374	55.6967	34.3411	11.6345	0	2.97823	5.71231	62.7739	protein_coding
XLOC_042580	Arhgap33	1.83292	2.32068	15.0958	18.5656	54.1132	20.0959	89.4808	118.137	201.835	198.945	protein_coding
XLOC_042585	Zbtb32	147.55	147.363	220.221	163.996	20.8128	17.9806	19.5739	15.8839	17.1369	0	protein_coding
XLOC_042608	Hpn	3.66585	27.8481	153.622	195.97	293.46	209.421	178.962	61.5502	103.774	46.3561	protein_coding
XLOC_042653	Lrp3	67.8182	73.1014	80.807	107.268	183.152	169.229	439.015	558.915	510.3	600.698	protein_coding
XLOC_042687	NA	0	0	0	0	0	0	5.59255	6.94921	34.2739	33.8013	lincRNA
XLOC_042693	Zfp536	12.8305	8.12237	20.4238	7.21994	14.5689	5.2884	151.931	224.36	635.019	815.095	protein_coding
XLOC_042701	Ccne1	1585.48	997.892	4603.34	3306.73	1252.93	1213.16	625.433	603.589	393.198	381.472	protein_coding
XLOC_042760	Gm2381	1394.85	994.411	893.317	622.978	363.183	187.21	89.4808	79.4196	41.8903	20.2808	protein_coding
XLOC_042767	Iglon5	0	0	4.43995	13.4085	43.7068	44.4226	18.6418	44.6735	41.8903	59.8766	protein_coding
XLOC_042788	Myh14	152.133	242.511	266.397	203.19	234.144	188.267	83.8882	37.7243	42.8424	27.0411	protein_coding
XLOC_042804	Rcn3	83.398	193.777	309.02	270.232	477.653	481.245	1067.24	739.595	1365.24	878.835	protein_coding
XLOC_042805	Fcgrt	125.555	126.477	60.3833	19.597	10.4064	15.8652	74.5673	47.6518	147.568	151.623	protein_coding
XLOC_042841	Sult2b1	50.4054	31.3292	41.7355	43.3196	15.6096	11.6345	0.932091	0.992745	2.85616	0	protein_coding
XLOC_042895	Dbx1	0.916462	0	0	0	0	1.05768	165.912	450.706	491.259	475.15	protein_coding
XLOC_043174	Peg12	53.1548	73.1014	74.5911	108.299	36.4223	33.8458	289.88	405.04	616.93	886.561	protein_coding
XLOC_043205	Aldh1a3	336.341	494.304	12.4319	6.18852	5.20319	1.05768	1.86418	2.97823	2.85616	7.72602	protein_coding
XLOC_043222	Pgpep1l	34.8255	58.017	6.21593	2.06284	3.12191	1.05768	0.932091	2.97823	0.952052	0.965752	protein_coding
XLOC_043272	St8sia2	1.83292	1.16034	1.77598	20.6284	57.2351	69.8069	54.9934	91.3325	139	197.013	protein_coding
XLOC_043293	Ntrk3	144.801	185.654	3.55196	0	6.24383	9.51913	21.4381	22.8331	72.356	74.3629	protein_coding
XLOC_043328	Man2a2	204.371	399.157	103.895	121.708	296.582	272.882	615.18	794.196	851.135	745.561	protein_coding
XLOC_043358	Hdgfrp3	92.5626	299.368	204.238	378.531	369.427	384.996	1197.74	1227.03	1476.63	1746.08	protein_coding
XLOC_043359	Bnc1	1.83292	1.16034	7.10392	7.21994	8.3251	4.23072	46.6046	36.7316	144.712	207.637	protein_coding
XLOC_043372	9930013L23Rik	28.4103	31.3292	5.32794	2.06284	50.9913	57.1148	80.1599	17.8694	86.6368	24.1438	protein_coding
XLOC_043378	Fah	228.199	176.372	144.742	100.048	85.3323	97.3066	48.4688	31.7678	20.9452	12.5548	protein_coding
XLOC_043438	Prss23	1.83292	3.48102	9.76789	29.9112	54.1132	102.595	637.55	458.648	690.238	670.232	protein_coding
XLOC_043443	Eed	3075.65	2334.6	3394.78	1816.33	629.586	789.03	629.162	543.031	573.136	595.869	protein_coding
XLOC_043458	NA	6.41523	4.64136	0.88799	9.28278	49.9506	14.8075	68.9748	69.4921	41.8903	50.2191	lincRNA
XLOC_043497	Mogat2	59.57	38.2912	43.5115	48.4767	130.08	394.515	185.486	80.4123	75.2121	27.0411	protein_coding
XLOC_043500	Serpinh1	2182.09	1612.87	570.977	1036.58	1200.9	2138.63	5429.43	3290.95	5113.47	4563.18	protein_coding
XLOC_043525	Dnajb13	84.3145	68.46	12.4319	5.1571	1.04064	66.6339	0.932091	1.98549	0	0	protein_coding
XLOC_043673	Dchs1	2.74938	4.64136	19.5358	69.1051	116.551	168.171	896.672	1478.2	1502.34	2179.7	protein_coding
XLOC_043754	Scube2	10.9975	6.96204	7.10392	2.06284	33.3004	28.5574	121.172	121.115	171.369	140.034	protein_coding
XLOC_043771	NA	8.24815	15.0844	20.4238	5.1571	49.9506	39.1342	82.024	90.3398	129.479	115.89	lincRNA
XLOC_043772	Galnt18	14.6634	9.28271	7.10392	13.4085	6.24383	14.8075	32.6232	48.6445	114.246	155.486	protein_coding
XLOC_043775	Dkk3	34.8255	54.5359	16.8718	21.6598	26.016	39.1342	214.381	187.629	287.52	181.561	protein_coding
XLOC_043796	Calca	202.538	263.397	214.005	97.9849	117.592	181.921	18.6418	17.8694	22.8493	33.8013	protein_coding
XLOC_043802	Sox6	5.49877	12.7637	7.99191	25.7855	21.8534	28.5574	305.726	340.512	296.088	250.13	protein_coding
XLOC_043841	Crym	12.8305	11.6034	63.9352	137.179	91.5762	48.6533	16.7776	10.9202	3.80821	43.4589	protein_coding
XLOC_043872	Zkscan2	36.6585	74.2617	18.6478	13.4085	33.3004	12.6922	131.425	148.912	229.445	206.671	protein_coding
XLOC_043896	Nfatc2ip	2833.7	2710.55	1069.14	790.068	393.361	413.553	234.887	234.288	208.499	214.397	protein_coding
XLOC_043914	Coro1a	18.3292	29.0085	140.302	239.289	140.486	116.345	26.0986	16.8767	23.8013	29.9383	protein_coding
XLOC_043936	2001-09-01	1926.4	689.241	436.891	381.625	45.7881	85.6722	8.38882	29.7823	7.61642	8.69177	protein_coding
XLOC_043941	Zfp768	64.1523	53.3756	35.5196	56.7281	68.6821	105.768	266.578	299.809	362.732	371.815	protein_coding
XLOC_043951	Zfp629	103.56	117.194	91.4629	214.535	324.679	439.995	902.264	1154.56	1211.96	1551.96	protein_coding
XLOC_043955	Stx1b	3.66585	8.12237	23.9757	26.8169	89.4949	51.8264	55.9255	102.253	66.6437	70.4999	protein_coding
XLOC_043963	Pycard	1128.16	1047.79	698.848	511.584	263.281	160.768	32.6232	5.95647	9.52052	5.79451	protein_coding
XLOC_044017	Ebf3	2.74938	6.96204	4.43995	3.09426	2.08128	0	32.6232	46.659	196.123	302.28	protein_coding
XLOC_044027	Bnip3	288.685	259.916	1598.38	1213.98	3236.38	3295.73	3008.79	1633.07	3083.7	2692.52	protein_coding
XLOC_044040	Msx3	0.916462	5.8017	0.88799	4.12568	0	1.05768	209.721	179.687	135.191	451.006	protein_coding
XLOC_044053	Syce1	38.4914	60.3376	173.158	39.194	27.0566	4.23072	16.7776	5.95647	4.76026	6.76027	protein_coding
XLOC_044089	Dusp8	1.83292	2.32068	8.8799	37.1311	30.1785	40.1919	54.0613	53.6082	100.918	143.897	protein_coding
XLOC_044108	Ascl2	46.7395	105.591	95.9029	83.545	64.5196	75.0953	10.253	2.97823	5.71231	4.82876	protein_coding
XLOC_044114	Kcnq1	838.562	960.761	727.263	1364.57	3335.25	2770.07	2909.99	8287.44	3411.2	5541.49	protein_coding
XLOC_044116	Cdkn1c	44.9066	73.1014	539.01	561.092	251.834	268.651	801.599	353.417	1333.83	2339.05	protein_coding
XLOC_044137	Ano1	15.5798	6.96204	15.9838	11.3456	28.0972	22.2113	66.1785	95.3035	205.643	253.993	protein_coding
XLOC_044199	Zfp358	32.0762	40.6119	39.0715	74.2622	85.3323	153.364	258.189	296.831	323.698	322.561	protein_coding
XLOC_044245	Myo16	0.916462	0	0	0	2.08128	2.11536	19.5739	20.8476	92.3491	98.5067	protein_coding
XLOC_044256	Col4a2	65.9852	150.844	94.1269	128.927	1232.12	928.644	15001.1	6040.85	9912.77	3614.81	protein_coding
XLOC_044340	Necsulea_Locus_46802	0	0	0	0	0	0	1.86418	0	114.246	124.582	lincRNA
XLOC_044341	Necsulea_Locus_46745	0	0	0	0	0	0	0	0	50.4588	80.1574	lincRNA
XLOC_044345	Gm5607	0	0	0	0	13.5283	2.11536	36.3516	17.8694	198.979	236.609	protein_coding
XLOC_044346	Sox1	51.3218	64.979	61.2713	21.6598	23.9347	6.34609	448.336	420.924	437.944	282	protein_coding
XLOC_044511	Thsd1	2.74938	8.12237	76.3671	64.9794	50.9913	21.1536	13.9814	33.7533	3.80821	37.6643	protein_coding
XLOC_044520	Plat	7.33169	8.12237	5.32794	22.6912	40.5849	39.1342	734.488	756.472	635.971	792.883	protein_coding
XLOC_044550	Kcnu1	43.0737	34.8102	76.3671	31.974	42.6662	15.8652	0.932091	5.95647	6.66437	0.965752	protein_coding
XLOC_044561	Zfp703	1.83292	4.64136	1.77598	2.06284	9.36574	40.1919	720.507	1017.56	521.725	409.479	protein_coding
XLOC_044566	Eif4ebp1	4783.01	4375.64	3761.52	2718.82	1407.98	1287.2	958.19	676.059	770.21	696.307	protein_coding
XLOC_044577	Dusp26	0.916462	2.32068	22.1997	29.9112	35.3817	51.8264	12.1172	3.97098	54.267	81.1232	protein_coding
XLOC_044578	Rnf122	13.7469	37.1309	86.135	104.173	132.161	121.633	149.135	213.44	225.636	292.623	protein_coding
XLOC_044613	Dusp4	82.4815	135.76	1439.43	1493.5	1409.02	1507.2	703.729	720.733	1105.33	1130.9	protein_coding
XLOC_044619	Ppp1r3b	493.056	410.76	28.4157	25.7855	96.7793	137.499	58.7218	39.7098	94.2532	62.7739	protein_coding
XLOC_044621	Mfhas1	63.2358	91.6668	53.2794	107.268	197.721	228.459	387.75	351.432	383.677	473.219	protein_coding
XLOC_044628	D8Ertd82e	66.9017	111.393	165.166	321.803	397.524	325.766	589.082	661.168	603.601	380.506	protein_coding
XLOC_044653	Slc7a2	5.49877	20.8861	72.8151	35.0683	70.7634	61.3455	214.381	177.701	397.958	316.767	protein_coding
XLOC_044665	Triml2	1116.25	820.36	605.609	192.875	165.461	64.5185	51.265	23.8259	29.5136	16.4178	protein_coding
XLOC_044675	Sorbs2	0	0	8.8799	19.597	23.9347	52.884	71.771	126.079	130.431	147.76	protein_coding
XLOC_044676	Pdlim3	2.74938	3.48102	20.4238	109.33	111.348	99.422	18.6418	17.8694	29.5136	46.3561	protein_coding
XLOC_044690	Irf2	0	5.8017	0	1.03142	18.7315	27.4997	49.4008	53.6082	90.445	95.6095	protein_coding
XLOC_044761	BC030500	0	0	1.77598	2.06284	2.08128	0	34.4874	39.7098	38.0821	26.0753	protein_coding
XLOC_044767	Mfap3l	5.49877	24.3671	58.6073	198.033	293.46	262.305	68.0427	51.6227	51.4108	56.0136	protein_coding
XLOC_044771	Sh3rf1	167.712	243.671	172.27	246.509	350.695	384.996	784.821	859.717	1057.73	870.143	protein_coding
XLOC_044778	Ddx60	0.916462	11.6034	33.7436	22.6912	131.12	46.538	17.7097	6.94921	8.56847	3.86301	protein_coding
XLOC_044821	Lpar2	44.9066	95.1478	150.958	195.97	474.531	500.283	318.775	391.142	252.294	193.15	protein_coding
XLOC_044829	Nr2c2ap	421.572	438.608	89.6869	71.168	91.5762	84.6145	41.9441	34.7461	31.4177	15.452	protein_coding
XLOC_044879	Insl3	789.99	654.431	88.799	93.8592	41.6255	47.5956	57.7897	67.5067	36.178	71.4657	protein_coding
XLOC_044894	Hsh2d	66.9017	95.1478	29.3037	2.06284	7.28447	1.05768	1.86418	4.96372	2.85616	1.9315	protein_coding
XLOC_044898	Klf2	1244.55	1067.51	1574.41	553.872	368.386	208.363	85.7524	106.224	41.8903	26.0753	protein_coding
XLOC_044917	Rasd2	35.742	67.2997	149.182	147.493	201.884	152.306	49.4008	30.7751	18.089	6.76027	protein_coding
XLOC_044935	Necsulea_blastnHuman.CUFF.436644	52.2383	64.979	9.76789	68.0737	181.071	250.67	5.59255	1.98549	0	0	lincRNA
XLOC_044943	Zfp827	74.2334	68.46	118.103	101.079	263.281	216.825	232.091	410.996	405.574	656.712	protein_coding
XLOC_044967	Rnf150	0.916462	0	0	5.1571	10.4064	9.51913	64.3143	85.3761	150.424	172.87	protein_coding
XLOC_044972	Clgn	6.41523	5.8017	67.4872	78.3879	78.0479	34.9035	161.252	97.289	51.4108	33.8013	protein_coding
XLOC_044988	Palm3	490.307	777.427	804.519	521.898	205.006	112.114	159.388	94.3108	75.2121	66.6369	protein_coding
XLOC_045064	Nkd1	18.3292	24.3671	21.3117	33.0054	62.4383	89.9029	156.591	221.382	173.274	323.527	protein_coding
XLOC_045087	Chd9	414.241	715.929	3279.35	3445.97	4485.15	2021.23	736.352	788.24	1044.4	1064.26	protein_coding
XLOC_045103	Irx5	7.33169	10.4431	4.43995	8.25136	5.20319	10.5768	121.172	156.854	225.636	356.363	protein_coding
XLOC_045107	Mmp2	22.9115	90.5065	176.71	324.897	287.216	258.074	254.461	284.918	138.048	314.835	protein_coding
XLOC_045147	Mmp15	148.467	242.511	81.695	133.053	180.03	297.208	1228.5	1097.98	855.895	808.335	protein_coding
XLOC_045183	Cdh5	0	0	0.88799	0	1.04064	9.51913	13.0493	77.4341	34.2739	90.7807	protein_coding
XLOC_045188	Cmtm3	33.9091	18.5654	23.0877	30.9426	38.5036	61.3455	133.289	147.919	125.671	173.835	protein_coding
XLOC_045190	Car7	0.916462	4.64136	8.8799	2.06284	46.8287	14.8075	101.598	19.8549	29.5136	5.79451	protein_coding
XLOC_045214	Slc9a5	25.6609	54.5359	64.8232	49.5081	221.656	134.325	196.671	240.244	201.835	159.349	protein_coding
XLOC_045248	Cdh1	3105.89	5148.42	5131.69	5292.21	7210.58	6858	1866.98	1403.74	885.409	476.116	protein_coding
XLOC_045319	Hydin	142.968	218.144	141.19	74.2622	53.0725	57.1148	16.7776	16.8767	14.2808	13.5205	protein_coding
XLOC_045348	Vat1l	1.83292	0	71.0392	120.676	99.9013	83.5568	36.3516	46.659	33.3218	81.1232	protein_coding
XLOC_045369	Plcg2	770.744	937.554	2463.28	2552.76	2529.79	1688.06	379.361	196.564	131.383	54.0821	protein_coding
XLOC_045382	Adad2	16.4963	51.0549	67.4872	50.5396	40.5849	21.1536	11.1851	2.97823	2.85616	0	protein_coding
XLOC_045394	Trim67	5.49877	9.28271	17.7598	38.1625	55.1538	158.652	5.59255	5.95647	53.3149	57.9451	protein_coding
XLOC_045457	BC068157	0.916462	5.8017	16.8718	26.8169	85.3323	67.6916	106.258	193.585	165.657	129.411	protein_coding
XLOC_045484	Efnb2	27.4938	42.9325	305.468	448.668	769.032	862.01	1288.15	2086.75	1170.07	1206.22	protein_coding
XLOC_045503	Irs2	186.958	239.03	261.069	861.235	1432.96	1326.33	1596.67	1296.52	1704.17	1207.19	protein_coding
XLOC_045504	Col4a1	176.877	321.414	391.603	456.919	2594.31	2176.71	26190.8	10643.2	17532	5615.85	protein_coding
XLOC_045511	1700016D06Rik	76.9828	52.2153	0.88799	0	0	0	0.932091	0	0	0	protein_coding
XLOC_045542	Tdrp	1265.63	1117.41	294.813	298.08	265.363	185.094	260.986	129.057	140.904	107.199	protein_coding
XLOC_045565	Angpt2	9.16462	1.16034	13.3198	2.06284	1.04064	5.2884	6.52464	72.4704	39.9862	80.1574	protein_coding
XLOC_045619	Atp7b	45.8231	74.2617	94.1269	128.927	328.842	395.573	550.866	427.873	346.547	241.438	protein_coding
XLOC_045688	Got1l1	511.386	569.727	174.046	106.236	217.493	61.3455	146.338	45.6663	89.4929	15.452	protein_coding
XLOC_045700	Unc5d	0.916462	1.16034	7.10392	4.12568	11.447	23.269	37.2837	29.7823	59.0272	45.3904	protein_coding
XLOC_045974	Triml1	387.663	445.57	319.676	121.708	212.29	59.2301	33.5553	24.8186	21.8972	4.82876	protein_coding
XLOC_045980	Zfp42	4465.92	2799.9	5507.31	2609.49	583.798	355.381	178.029	140.97	81.8765	49.2534	protein_coding
XLOC_046190	Cpe	46.7395	110.232	38.1836	99.0163	191.477	194.613	369.108	410.996	626.45	733.006	protein_coding
XLOC_046196	Gm10664	672.683	838.925	435.115	600.286	198.762	649.416	58.7218	62.5429	37.13	37.6643	lincRNA
XLOC_046213	Psd3	16.4963	24.3671	45.2875	78.3879	117.592	78.2684	273.103	364.337	345.595	418.171	protein_coding
XLOC_046230	Lzts1	38.4914	51.0549	14.2078	56.7281	99.9013	412.496	23.3023	34.7461	92.3491	241.438	protein_coding
XLOC_046262	Tmem59l	0.916462	1.16034	95.9029	112.425	139.446	86.7298	82.9561	41.6953	20.9452	8.69177	protein_coding
XLOC_046267	Gdf15	268.523	142.722	31.0796	13.4085	8.3251	2.11536	5.59255	4.96372	1.9041	4.82876	protein_coding
XLOC_046283	Slc5a5	3.66585	2.32068	23.9757	73.2308	84.2917	108.941	30.759	24.8186	21.8972	16.4178	protein_coding
XLOC_046295	NA	0	0	44.3995	47.4453	72.8447	198.844	8.38882	0.992745	1.9041	0.965752	lincRNA
XLOC_046302	B3gnt3	113.641	139.241	11.5439	1.03142	6.24383	9.51913	8.38882	2.97823	4.76026	0.965752	protein_coding
XLOC_046343	Ednra	0	0	1.77598	4.12568	9.36574	11.6345	129.561	151.89	156.137	310.972	protein_coding
XLOC_046347	Pou4f2	43.9902	25.5275	73.7031	8.25136	5.20319	11.6345	0	0.992745	1.9041	0	protein_coding
XLOC_046366	Hhip	28.4103	24.3671	6.21593	5.1571	7.28447	6.34609	225.566	272.012	447.465	467.424	protein_coding
XLOC_046419	Nfix	9.16462	18.5654	1.77598	2.06284	7.28447	1.05768	102.53	48.6445	51.4108	45.3904	protein_coding
XLOC_046478	Zfp423	11.914	32.4895	583.409	260.949	268.485	204.132	428.762	577.778	437.944	487.705	protein_coding
XLOC_046503	Tox3	34.8255	23.2068	26.6397	58.7909	137.364	160.768	293.609	348.453	321.794	323.527	protein_coding
XLOC_046515	Irx3	15.5798	15.0844	13.3198	11.3456	6.24383	53.9417	589.082	603.589	490.307	604.561	protein_coding
XLOC_046558	Zfp319	56.8206	55.6963	54.1674	60.8538	134.242	138.556	317.843	397.098	384.629	405.616	protein_coding
XLOC_046612	Exoc3l	84.3145	85.8651	250.413	72.1994	66.6008	37.0188	3.72837	12.9057	11.4246	12.5548	protein_coding
XLOC_046615	Lrrc29	23.828	41.7722	12.4319	7.21994	62.4383	47.5956	91.345	119.129	107.582	76.2944	protein_coding
XLOC_046618	Tppp3	9.16462	9.28271	94.1269	72.1994	32.2598	82.4991	51.265	63.5357	235.157	287.794	protein_coding
XLOC_046619	Zdhhc1	7.33169	13.9241	26.6397	9.28278	60.357	53.9417	74.5673	87.3616	125.671	121.685	protein_coding
XLOC_046633	Psmb10	134.72	143.882	586.961	444.542	241.428	266.536	74.5673	43.6808	65.6916	35.7328	protein_coding
XLOC_046644	Smpd3	0	0	7.99191	9.28278	50.9913	31.7304	47.5367	55.5937	109.486	175.767	protein_coding
XLOC_046665	Nqo1	1135.5	1130.17	1125.08	646.7	150.893	138.556	67.1106	68.4994	40.9383	56.0136	protein_coding
XLOC_046670	Guttman_lincRNA_1756	209.87	215.823	119.879	35.0683	56.1945	12.6922	18.6418	5.95647	7.61642	1.9315	lincRNA
XLOC_046689	Marveld3	21.0786	29.0085	39.0715	90.7649	150.893	101.537	18.6418	19.8549	10.4726	7.72602	protein_coding
XLOC_046693	Calb2	240.113	259.916	13.3198	12.377	7.28447	10.5768	2.79627	1.98549	15.2328	12.5548	protein_coding
XLOC_046696	Hydin	395.911	138.08	21.3117	59.8223	6.24383	13.7499	0	2.97823	0	0.965752	protein_coding
XLOC_046742	Maf	0.916462	0	5.32794	4.12568	19.7721	16.9229	156.591	84.3833	199.931	208.603	protein_coding
XLOC_046749	Cdyl2	842.228	1456.23	1125.08	409.474	159.218	124.806	134.221	121.115	135.191	97.541	protein_coding
XLOC_046782	Egln1	186.958	233.228	247.749	277.452	1007.34	1290.37	1521.17	1085.07	1405.23	1285.42	protein_coding
XLOC_046796	Pcnxl2	1.83292	15.0844	39.9595	92.8278	104.064	77.2107	13.0493	2.97823	4.76026	9.65752	protein_coding
XLOC_046867	Gucy1a2	46.7395	42.9325	42.6235	74.2622	169.624	375.477	216.245	457.655	257.054	478.047	protein_coding
XLOC_046912	NA	0	1.16034	10.6559	31.974	98.8606	122.691	218.109	392.134	324.65	436.52	lincRNA
XLOC_046913	NA	0	1.16034	0.88799	11.3456	47.8694	46.538	80.1599	185.643	114.246	186.39	lincRNA
XLOC_046914	Phxr4	0	1.16034	3.55196	26.8169	185.234	157.594	267.51	681.023	390.341	563.034	protein_coding
XLOC_046969	Slc36a4	20.1622	34.8102	30.1916	38.1625	68.6821	71.9223	174.301	205.498	343.691	439.417	protein_coding
XLOC_047021	Icam1	989.778	1421.42	1086.9	451.762	225.818	148.075	137.95	56.5865	84.7327	42.4931	protein_coding
XLOC_047042	Cnn1	10.0811	6.96204	86.135	310.457	189.396	251.728	39.1478	48.6445	26.6575	27.0411	protein_coding
XLOC_047052	Bmper	0.916462	1.16034	2.66397	4.12568	8.3251	29.6151	19.5739	55.5937	51.4108	138.103	protein_coding
XLOC_047064	B3gat1	0	0	0.88799	1.03142	3.12191	0	8.38882	12.9057	45.6985	55.0479	protein_coding
XLOC_047070	Opcml	0	0	0	1.03142	0	4.23072	22.3702	50.63	19.9931	29.9383	protein_coding
XLOC_047107	Ets1	39.4078	33.6498	41.7355	108.299	269.525	235.863	362.584	424.895	297.04	759.081	protein_coding
XLOC_047152	Robo4	0	0	102.119	25.7855	8.3251	26.442	3.72837	16.8767	8.56847	52.1506	protein_coding
XLOC_047296	Thy1	5.49877	12.7637	36.4076	39.194	84.2917	40.1919	7.45673	3.97098	0	3.86301	protein_coding
XLOC_047317	Mpzl2	1283.96	1459.71	507.93	415.662	418.337	480.187	215.313	140.97	221.828	148.726	protein_coding
XLOC_047333	Apoa1	4.58231	1.16034	4.43995	1.03142	59.3164	13.7499	1576.17	311.722	311.321	93.678	protein_coding
XLOC_047334	Apoa4	0	0	0	0	41.6255	9.51913	686.951	87.3616	167.561	27.0411	protein_coding
XLOC_047364	NA	0.916462	0	0	1.03142	21.8534	6.34609	22.3702	48.6445	31.4177	34.7671	lincRNA
XLOC_047366	Nxpe4	2.74938	1.16034	1.77598	4.12568	13.5283	24.3267	53.1292	71.4776	74.2601	90.7807	protein_coding
XLOC_047404	Exph5	114.558	192.616	24.8637	20.6284	13.5283	27.4997	51.265	147.919	117.102	111.062	protein_coding
XLOC_047409	Slc35f2	288.685	338.819	477.738	404.317	257.038	236.921	131.425	79.4196	56.1711	36.6986	protein_coding
XLOC_047425	Chrna5	4.58231	8.12237	7.10392	15.4713	17.6908	9.51913	30.759	49.6372	143.76	222.123	protein_coding
XLOC_047432	Rfpl3s	10.9975	4.64136	24.8637	29.9112	66.6008	56.0571	96.9375	175.716	120.911	160.315	protein_coding
XLOC_047456	Rpp25	856.892	508.229	589.625	360.997	100.942	108.941	61.518	46.659	26.6575	29.9383	protein_coding
XLOC_047469	Gm17322	5.49877	12.7637	121.655	24.7541	6.24383	10.5768	0	0	1.9041	0.965752	lincRNA
XLOC_047471	Stra6	0.916462	1.16034	5.32794	5.1571	24.9753	29.6151	530.36	375.258	506.492	394.993	protein_coding
XLOC_047572	Igdcc4	33.9091	71.941	120.767	297.049	268.485	209.421	173.369	200.534	376.061	426.863	protein_coding
XLOC_047573	Igdcc3	56.8206	100.95	30.1916	97.9849	99.9013	192.498	1736.49	2385.57	3579.72	1935.37	protein_coding
XLOC_047581	Gm514	391.329	353.903	100.343	35.0683	45.7881	15.8652	16.7776	33.7533	21.8972	28.9726	protein_coding
XLOC_047586	Rbpms2	673.599	807.596	812.51	940.655	1336.18	945.567	166.844	149.904	100.918	77.2602	protein_coding
XLOC_047641	Aldh1a2	98.9778	52.2153	29.3037	15.4713	12.4877	7.40377	42.8762	98.2818	144.712	160.315	protein_coding
XLOC_047665	Prtg	232.781	145.042	420.907	876.707	2518.34	3994.86	16978	14120.8	6092.18	2683.83	protein_coding
XLOC_047667	Pygo1	25.6609	18.5654	17.7598	20.6284	44.7474	25.3843	99.7338	125.086	199.931	331.253	protein_coding
XLOC_047682	Onecut1	1.83292	5.8017	0.88799	2.06284	6.24383	2.11536	48.4688	132.035	249.438	290.691	protein_coding
XLOC_047687	Gnb5	18.3292	39.4515	64.8232	48.4767	65.5602	50.7687	171.505	149.904	189.458	227.918	protein_coding
XLOC_047693	Bmp5	0	0	0	0	0	19.0383	14.9135	44.6735	32.3698	99.4725	protein_coding
XLOC_047778	Nt5e	4.58231	0	74.5911	81.4822	78.0479	304.612	87.6166	31.7678	42.8424	26.0753	protein_coding
XLOC_047823	Zic4	0	0	0	0	0	1.05768	33.5553	29.7823	13.3287	33.8013	protein_coding
XLOC_047830	Plod2	249.278	394.515	1395.03	1453.27	2365.37	2528.92	2873.64	1319.36	2552.45	1483.4	protein_coding
XLOC_047848	Pcolce2	1203.31	874.896	243.309	165.027	54.1132	85.6722	24.2344	25.8114	11.4246	22.2123	protein_coding
XLOC_047869	Rbp1	95.312	53.3756	106.559	155.744	67.6415	197.786	835.154	799.16	3061.8	3657.3	protein_coding
XLOC_047918	Slco2a1	0.916462	6.96204	0	10.3142	14.5689	17.9806	132.357	34.7461	59.9793	17.3835	protein_coding
XLOC_047919	Rab6b	8.24815	34.8102	24.8637	33.0054	70.7634	51.8264	213.449	159.832	182.794	124.582	protein_coding
XLOC_047997	Gpx1	7196.97	4853.7	2621.35	2219.62	589.001	1039.7	1044.87	657.197	760.69	771.636	protein_coding
XLOC_048010	Slc25a20	1070.43	1248.52	369.404	377.5	129.039	153.364	261.918	202.52	246.582	309.041	protein_coding
XLOC_048025	Plxnb1	141.135	170.57	378.284	647.732	922.005	1006.91	1029.03	1456.36	1310.02	1403.24	protein_coding
XLOC_048037	Cspg5	39.4078	64.979	87.911	47.4453	110.308	41.2496	147.27	196.564	307.513	370.849	protein_coding
XLOC_048048	Myl3	0	10.4431	3.55196	11.3456	17.6908	17.9806	52.1971	68.4994	60.9314	37.6643	protein_coding
XLOC_048057	Lrrc2	1019.11	490.823	323.228	258.886	65.5602	81.4414	8.38882	6.94921	0.952052	3.86301	protein_coding
XLOC_048064	Dclk3	80.6486	42.9325	9.76789	10.3142	1.04064	4.23072	1.86418	0	2.85616	11.589	protein_coding
XLOC_048117	Eomes	54.0712	45.2532	99.4548	91.7964	181.071	1759.98	33.5553	11.9129	9.52052	5.79451	protein_coding
XLOC_048122	Itga9	14.6634	25.5275	117.215	101.079	127.998	175.575	458.589	666.132	481.739	552.41	protein_coding
XLOC_048131	Acvr2b	385.83	631.225	776.103	1242.86	2589.11	3115.93	3342.48	3861.78	3331.23	2612.36	protein_coding
XLOC_048149	Entpd3	29.3268	58.017	2.66397	4.12568	4.16255	4.23072	68.9748	92.3253	97.1093	73.3972	protein_coding
XLOC_048186	NA	13.7469	17.4051	6.21593	16.5027	40.5849	33.8458	98.8017	170.752	154.232	157.418	lincRNA
XLOC_048260	Fut4	1.83292	2.32068	8.8799	36.0997	18.7315	35.9612	124.9	97.289	71.4039	59.8766	protein_coding
XLOC_048280	Fat3	2.74938	3.48102	30.1916	90.7649	147.771	263.363	840.746	1064.22	2093.56	2566	protein_coding
XLOC_048323	Col5a3	170.462	122.996	103.895	59.8223	52.0319	28.5574	9.32091	10.9202	10.4726	9.65752	protein_coding
XLOC_048340	Ap1m2	82.4815	131.118	619.817	813.79	480.775	508.745	192.011	140.97	135.191	93.678	protein_coding
XLOC_048361	Rgl3	0.916462	1.16034	2.66397	14.4399	168.583	50.7687	47.5367	64.5284	56.1711	56.0136	protein_coding
XLOC_048363	Elavl3	25.6609	60.3376	118.991	96.9535	275.769	85.6722	24.2344	27.7969	244.677	439.417	protein_coding
XLOC_048386	Tbx20	82.4815	247.152	53.2794	117.582	35.3817	133.268	13.9814	49.6372	10.4726	17.3835	protein_coding
XLOC_048413	Adamts15	25.6609	42.9325	20.4238	54.6652	249.753	520.379	134.221	82.3978	85.6847	73.3972	protein_coding
XLOC_048474	Robo3	0.916462	1.16034	8.8799	0	4.16255	7.40377	1.86418	5.95647	318.938	610.356	protein_coding
XLOC_048518	Olfr986	9.16462	15.0844	32.8556	25.7855	54.1132	19.0383	2.79627	0.992745	0	0	protein_coding
XLOC_048547	Pou2f3	82.4815	187.975	59.4953	21.6598	18.7315	5.2884	5.59255	2.97823	0.952052	0.965752	protein_coding
XLOC_048548	Oaf	52.2383	62.6583	10.6559	14.4399	30.1785	41.2496	204.128	112.18	139.952	153.555	protein_coding
XLOC_048599	Tagln	0.916462	1.16034	71.0392	936.529	359.02	698.069	173.369	225.353	99.0134	133.274	protein_coding
XLOC_048631	Zbtb16	2.74938	4.64136	1.77598	4.12568	23.9347	62.4032	850.999	1020.54	868.272	546.616	protein_coding
XLOC_048638	Ncam1	579.204	591.773	118.103	88.7021	86.373	140.672	314.115	461.626	1135.8	1384.89	protein_coding
XLOC_048688	Chrna3	0	0	0.88799	1.03142	1.04064	2.11536	71.771	115.158	215.164	264.616	protein_coding
XLOC_048689	Chrnb4	0.916462	2.32068	8.8799	9.28278	8.3251	12.6922	89.4808	127.071	149.472	138.103	protein_coding
XLOC_048697	Pstpip1	8.24815	15.0844	5.32794	16.5027	57.2351	50.7687	96.9375	107.216	79.0203	89.815	protein_coding
XLOC_048705	Snx33	25.6609	25.5275	39.9595	88.7021	114.47	189.325	365.38	444.75	357.02	417.205	protein_coding
XLOC_048726	Ccdc33	0	1.16034	0	0	6.24383	71.9223	16.7776	15.8839	13.3287	4.82876	protein_coding
XLOC_048727	Islr	0.916462	5.8017	0.88799	0	2.08128	5.2884	10.253	11.9129	35.2259	121.685	protein_coding
XLOC_048831	Zfp609	108.142	322.574	444.883	544.59	1235.24	1130.66	907.857	1376.94	1124.37	879.8	protein_coding
XLOC_048871	Foxb1	0	1.16034	0	0	4.16255	28.5574	96.9375	85.3761	288.472	225.986	protein_coding
XLOC_048874	Fam81a	577.371	654.431	121.655	89.7335	31.2191	32.7881	15.8456	10.9202	9.52052	6.76027	protein_coding
XLOC_048889	Cgnl1	17.4128	17.4051	580.745	749.842	960.509	961.432	682.291	926.231	550.286	578.486	protein_coding
XLOC_048930	Tmod2	43.9902	100.95	180.262	271.263	418.337	400.861	364.448	518.213	393.198	506.054	protein_coding
XLOC_048931	Scg3	2.74938	2.32068	7.99191	4.12568	8.3251	4.23072	4.66046	8.9347	82.8286	150.657	protein_coding
XLOC_048964	Ooep	1843	966.563	811.622	407.411	152.974	139.614	51.265	62.5429	7.61642	11.589	protein_coding
XLOC_048979	Col12a1	0.916462	1.16034	3.55196	11.3456	50.9913	32.7881	1041.15	660.175	623.594	761.979	protein_coding
XLOC_049002	Elovl4	39.4078	69.6204	143.854	224.85	182.112	148.075	349.534	354.41	436.992	457.767	protein_coding
XLOC_049005	Fam46a	10.0811	25.5275	17.7598	50.5396	66.6008	67.6916	139.814	151.89	109.486	75.3287	protein_coding
XLOC_049060	Zic1	0	2.32068	0	3.09426	2.08128	1.05768	642.211	428.866	271.335	442.315	protein_coding
XLOC_049100	Spsb4	2.74938	4.64136	32.8556	36.0997	33.3004	44.4226	809.987	871.63	898.737	867.246	protein_coding
XLOC_049109	Clstn2	1.83292	4.64136	4.43995	13.4085	35.3817	37.0188	166.844	186.636	632.163	427.828	protein_coding
XLOC_049121	Mras	581.037	603.376	256.629	55.6967	12.4877	17.9806	51.265	73.4631	83.7806	98.5067	protein_coding
XLOC_049168	Ackr4	13.7469	12.7637	6.21593	91.7964	20.8128	43.3649	1.86418	1.98549	0.952052	2.89726	protein_coding
XLOC_049181	Col6a5	2.74938	1.16034	143.854	74.2622	27.0566	19.0383	2.79627	9.92745	1.9041	2.89726	protein_coding
XLOC_049195	Grm2	6.41523	9.28271	3.55196	2.06284	2.08128	4.23072	10.253	12.9057	193.267	218.26	protein_coding
XLOC_049202	Mapkapk3	654.354	768.145	1401.25	1110.84	559.863	577.494	131.425	124.093	108.534	116.856	protein_coding
XLOC_049208	Slc38a3	11.914	39.4515	111.887	111.393	196.681	217.882	321.572	256.128	218.02	118.788	protein_coding
XLOC_049210	Sema3f	48.5725	47.5739	37.2956	35.0683	95.7387	244.324	158.456	210.462	249.438	268.479	protein_coding
XLOC_049266	Pth1r	4.58231	1.16034	10.6559	34.0369	73.8853	82.4991	665.513	359.374	1092	834.41	protein_coding
XLOC_049270	Tdgf1	6535.29	5621.84	12613.9	10234.8	3664.09	7483.09	57.7897	71.4776	16.1849	24.1438	protein_coding
XLOC_049311	Cmtm8	1.83292	15.0844	23.9757	45.3825	117.592	104.71	171.505	139.977	202.787	103.336	protein_coding
XLOC_049328	Rbms3	0	0	0	0	3.12191	4.23072	207.856	241.237	397.958	474.184	protein_coding
XLOC_049334	Gm26975	98.0614	100.95	166.054	96.9535	244.55	78.2684	10.253	12.9057	1.9041	5.79451	lincRNA
XLOC_049347	Scn5a	0.916462	8.12237	14.2078	51.571	88.4542	89.9029	145.406	115.158	203.739	86.9177	protein_coding
XLOC_049385	Cdcp1	20.1622	67.2997	213.117	500.239	469.328	438.938	448.336	234.288	261.814	141.966	protein_coding
XLOC_049612	Nudt11	40.3243	49.8946	156.286	197.001	134.242	170.287	629.162	585.72	377.013	352.5	protein_coding
XLOC_049620	Shroom4	15.5798	78.9031	555.881	436.291	443.312	480.187	524.767	544.024	478.882	334.15	protein_coding
XLOC_049621	Dgkk	0	0	8.8799	19.597	97.82	1716.62	86.6845	153.875	45.6985	50.2191	protein_coding
XLOC_049628	Syp	6.41523	2.32068	18.6478	35.0683	58.2757	75.0953	17.7097	31.7678	62.8355	103.336	protein_coding
XLOC_049640	Pim2	49.4889	54.5359	728.151	1719.38	2671.32	2748.91	61.518	65.5212	45.6985	36.6986	protein_coding
XLOC_049648	Suv39h1	194.29	39.4515	62.1593	88.7021	3.12191	11.6345	0	4.96372	0	0.965752	protein_coding
XLOC_049755	Chst7	6.41523	17.4051	20.4238	29.9112	22.894	138.556	144.474	86.3688	104.726	61.8082	protein_coding
XLOC_049841	Zcchc12	0.916462	2.32068	34.6316	59.8223	35.3817	70.8646	17.7097	5.95647	6.66437	13.5205	protein_coding
XLOC_049875	Rhox6	408.742	8.12237	38.1836	247.541	13.5283	16.9229	83.8882	62.5429	68.5478	22.2123	protein_coding
XLOC_049968	Cxx1c	0	0	3.55196	0	7.28447	74.0377	2.79627	9.92745	3.80821	10.6233	protein_coding
XLOC_050024	Zic3	330.843	250.633	2200.44	640.512	651.439	685.377	62.4501	45.6663	22.8493	9.65752	protein_coding
XLOC_050046	Ldoc1	3.66585	2.32068	72.8151	100.048	39.5442	13.7499	21.4381	9.92745	14.2808	8.69177	protein_coding
XLOC_050053	4933402E13Rik	7.33169	44.0929	95.9029	14.4399	44.7474	9.51913	280.56	32.7606	96.1573	18.3493	protein_coding
XLOC_050091	Aff2	3.66585	33.6498	76.3671	11.3456	53.0725	52.884	105.326	194.578	74.2601	109.13	protein_coding
XLOC_050107	Mtm1	703.842	756.541	123.431	88.7021	66.6008	38.0765	112.783	72.4704	101.87	139.068	protein_coding
XLOC_050109	Hmgb3	429.82	193.777	214.893	318.709	402.727	529.898	1041.15	1167.47	1032.98	1287.35	protein_coding
XLOC_050133	Xlr3b	16.4963	48.7342	95.9029	3.09426	21.8534	1.05768	15.8456	0.992745	17.1369	0.965752	protein_coding
XLOC_050261	Nr0b1	1004.44	581.33	1716.48	670.423	131.12	124.806	17.7097	29.7823	54.267	34.7671	protein_coding
XLOC_050301	Pcyt1b	208.037	286.604	743.247	544.59	335.085	322.593	37.2837	64.5284	14.2808	55.0479	protein_coding
XLOC_050317	Zxdb	41.2408	93.9875	29.3037	38.1625	83.251	57.1148	208.788	153.875	249.438	197.979	protein_coding
XLOC_050335	Ar	2.74938	22.0464	22.1997	147.493	98.8606	143.845	14.9135	13.8984	5.71231	17.3835	protein_coding
XLOC_050340	Efnb1	35.742	42.9325	23.9757	50.5396	36.4223	60.2878	499.601	259.106	597.889	678.924	protein_coding
XLOC_050351	Otud6a	162.214	135.76	73.7031	118.613	18.7315	24.3267	16.7776	15.8839	6.66437	4.82876	protein_coding
XLOC_050413	Gm26992	69.6511	87.0254	352.532	93.8592	171.705	65.5762	19.5739	36.7316	5.71231	7.72602	protein_coding
XLOC_050468	Lpar4	14.6634	3.48102	182.038	399.159	362.142	422.015	142.61	131.042	104.726	170.938	protein_coding
XLOC_050491	Pou3f4	1.83292	0	2.66397	8.25136	14.5689	13.7499	44.7404	40.7025	260.862	532.13	protein_coding
XLOC_050507	Zfp711	65.0688	75.422	38.1836	72.1994	11.447	23.269	61.518	102.253	136.143	280.068	protein_coding
XLOC_050513	Dach2	32.0762	22.0464	13.3198	14.4399	23.9347	27.4997	185.486	213.44	507.444	401.753	protein_coding
XLOC_050623	Armcx4	131.054	155.485	534.57	716.837	1358.03	1505.08	1420.51	2393.51	2507.71	2636.5	protein_coding
XLOC_050712	Mum1l1	10.0811	27.8481	158.062	273.326	317.395	646.243	480.027	501.336	425.567	414.308	protein_coding
XLOC_050713	Trap1a	1470	1564.14	954.589	309.426	245.591	164.998	426.898	122.108	224.684	64.7054	protein_coding
XLOC_050716	D330045A20Rik	0.916462	2.32068	47.0634	58.7909	9.36574	5.2884	40.0799	30.7751	53.3149	26.0753	protein_coding
XLOC_050717	Rnf128	161.297	54.5359	236.205	437.322	1132.21	746.723	861.252	529.133	351.307	216.329	protein_coding
XLOC_050719	Cldn2	0	0	7.99191	4.12568	4.16255	2.11536	235.819	64.5284	62.8355	22.2123	protein_coding
XLOC_050751	Pak3	20.1622	22.0464	56.8313	145.43	282.013	145.96	205.992	259.106	168.513	449.075	protein_coding
XLOC_050867	Gpr143	114.558	26.6878	19.5358	55.6967	4.16255	35.9612	0	2.97823	0.952052	0	protein_coding
XLOC_050877	Klf8	1521.33	1169.62	595.841	448.668	224.778	226.344	228.362	109.202	165.657	71.4657	protein_coding
XLOC_050924	Rps6ka3	325.344	425.844	371.18	467.233	608.773	689.608	1783.09	2208.86	1465.21	1409.03	protein_coding
XLOC_050942	Rai2	0	0	0	2.06284	6.24383	7.40377	28.8948	72.4704	31.4177	53.1164	protein_coding
XLOC_051056	Eras	39.4078	44.0929	489.282	326.96	169.624	323.65	57.7897	30.7751	7.61642	9.65752	protein_coding
XLOC_051060	Glod5	89.8132	12.7637	25.7517	76.3251	4.16255	7.40377	0.932091	1.98549	2.85616	0	protein_coding
XLOC_051065	Was	107.226	75.422	40.8475	21.6598	4.16255	2.11536	1.86418	6.94921	4.76026	1.9315	protein_coding
XLOC_051163	NA	1.83292	1.16034	0	11.3456	16.6502	15.8652	24.2344	72.4704	35.2259	27.0411	lincRNA
XLOC_051164	NA	0.916462	4.64136	6.21593	5.1571	31.2191	28.5574	47.5367	75.4486	52.3629	22.2123	lincRNA
XLOC_051168	Gm26652	5.49877	9.28271	17.7598	21.6598	43.7068	53.9417	109.055	125.086	140.904	57.9451	lincRNA
XLOC_051173	Slc9a7	28.4103	19.7258	123.431	63.948	342.37	214.709	121.172	128.064	106.63	62.7739	protein_coding
XLOC_051302	Rhox9	122.806	15.0844	46.1755	136.147	4.16255	13.7499	50.3329	54.601	43.7944	26.0753	protein_coding
XLOC_051309	Tmem255a	0	0	0.88799	1.03142	2.08128	5.2884	3.72837	30.7751	10.4726	395.958	protein_coding
XLOC_051348	Dcaf12l1	35.742	76.5824	277.941	632.26	501.588	157.594	283.356	104.238	155.185	134.24	protein_coding
XLOC_051364	Apln	15.5798	30.1688	15.0958	6.18852	58.2757	396.63	95.0733	48.6445	73.308	74.3629	protein_coding
XLOC_051376	Igsf1	21.0786	9.28271	60.3833	184.624	157.136	209.421	77.3636	50.63	29.5136	21.2466	protein_coding
XLOC_051383	6720401G13Rik	330.843	980.487	846.254	370.28	3160.42	711.819	1212.65	592.669	1186.26	270.411	lincRNA
XLOC_051397	Usp26	40.3243	64.979	895.093	286.735	524.482	80.3838	127.697	21.8404	37.13	10.6233	protein_coding
XLOC_051401	Gpc4	79.7322	439.769	152.734	215.567	539.051	1003.74	239.547	118.137	238.013	251.096	protein_coding
XLOC_051435	Mtap7d3	27.4938	8.12237	88.799	275.389	213.331	323.65	20.506	52.6155	11.4246	16.4178	protein_coding
XLOC_051458	Mcf2	2982.17	2244.1	578.081	382.657	262.241	389.227	24.2344	41.6953	14.2808	21.2466	protein_coding
XLOC_051468	Sox3	22.9115	4.64136	29.3037	86.6393	162.34	151.248	198.535	340.512	453.177	457.767	protein_coding
XLOC_051482	Slitrk4	0	0	39.9595	64.9794	34.3411	10.5768	51.265	47.6518	75.2121	49.2534	protein_coding
XLOC_051541	Cd99l2	70.5675	68.46	40.8475	59.8223	104.064	117.403	206.924	269.034	316.081	384.369	protein_coding
XLOC_051555	Pnma5	629.609	706.647	649.12	321.803	139.446	65.5762	205.992	76.4414	82.8286	40.5616	protein_coding
XLOC_051562	Xlr3c	21.0786	31.3292	123.431	6.18852	20.8128	1.05768	6.52464	2.97823	1.9041	0.965752	protein_coding
XLOC_051574	Pdzd4	416.99	388.714	4692.14	3533.64	2744.16	1444.79	274.967	183.658	193.267	194.116	protein_coding
XLOC_051575	L1cam	5.49877	8.12237	70.1512	75.2936	64.5196	65.5762	24.2344	23.8259	184.698	191.219	protein_coding
XLOC_051615	Rab39b	5.49877	4.64136	44.3995	103.142	67.6415	46.538	54.9934	61.5502	67.5957	128.445	protein_coding
XLOC_051660	Mageb16	460.064	734.495	1143.73	378.531	216.453	64.5185	163.116	39.7098	82.8286	18.3493	protein_coding
XLOC_051680	Dmd	52.2383	13.9241	104.783	78.3879	96.7793	42.3072	8.38882	9.92745	0	1.9315	protein_coding
XLOC_051798	Slc7a3	1700.95	816.879	2902.84	4046.26	1778.45	1392.97	134.221	124.093	157.089	227.918	protein_coding
XLOC_051817	Cited1	6.41523	17.4051	11.5439	10.3142	64.5196	63.4609	167.776	57.5792	113.294	39.5958	protein_coding
XLOC_051890	Fndc3c1	0.916462	0	146.518	548.715	1055.21	1154.99	1034.62	1624.13	1195.78	1039.15	protein_coding
XLOC_052021	Pcdh19	80.6486	118.355	15.9838	24.7541	19.7721	20.0959	112.783	197.556	338.931	495.431	protein_coding
XLOC_052022	Tspan6	89.8132	33.6498	99.4548	291.892	197.721	512.975	765.247	788.24	734.984	979.273	protein_coding
XLOC_052037	Armcx2	68.7346	97.4685	629.585	895.272	909.518	1123.26	1303.06	1193.28	1453.78	1436.07	protein_coding
XLOC_052050	Nxf7	0.916462	9.28271	0.88799	2.06284	109.267	86.7298	291.745	87.3616	173.274	56.9794	protein_coding
XLOC_052099	Ripply1	13.7469	6.96204	130.534	37.1311	34.3411	28.5574	6.52464	2.97823	0.952052	1.9315	protein_coding
XLOC_052103	Nup62cl	908.213	679.959	678.424	765.313	124.877	129.037	372.837	129.057	257.054	113.959	protein_coding
XLOC_052109	Tsc22d3	80.6486	205.38	30.1916	42.2882	90.5355	244.324	243.276	237.266	340.835	484.808	protein_coding
XLOC_052118	Irs4	3.66585	1.16034	78.1431	109.33	343.411	805.953	30.759	42.688	23.8013	16.4178	protein_coding
XLOC_052136	Chrdl1	0	0	3.55196	2.06284	12.4877	11.6345	46.6046	91.3325	25.7054	27.0411	protein_coding
XLOC_052137	Capn6	27.4938	11.6034	2.66397	12.377	8.3251	58.1725	220.906	898.434	330.362	922.294	protein_coding
XLOC_052138	Dcx	0	0	0	3.09426	0	11.6345	30.759	464.605	749.265	1627.29	protein_coding
XLOC_052151	Amot	46.7395	41.7722	157.174	300.143	1919.98	8262.6	1405.59	1308.44	879.696	611.321	protein_coding
XLOC_052198	Gpr173	7.33169	4.64136	23.0877	36.0997	43.7068	22.2113	75.4994	99.2745	112.342	156.452	protein_coding
XLOC_052210	Kctd12b	22.9115	1.16034	61.2713	679.706	232.062	350.092	22.3702	71.4776	15.2328	63.7397	protein_coding
XLOC_052242	Ptchd1	18.3292	8.12237	37.2956	94.8906	160.258	100.48	23.3023	12.9057	6.66437	9.65752	protein_coding
XLOC_052260	Cnksr2	33.9091	42.9325	37.2956	87.6707	90.5355	173.46	250.733	390.149	281.808	352.5	protein_coding
XLOC_052281	Nhs	21.0786	12.7637	112.775	225.881	221.656	177.69	123.968	173.73	267.527	252.061	protein_coding
XLOC_052370	Uba1y	302.432	531.435	372.068	253.729	193.559	131.152	63.3822	36.7316	24.7534	35.7328	protein_coding
XLOC_052371	Kdm5d	4.58231	4.64136	7.10392	42.2882	4.16255	37.0188	14.9135	67.5067	7.61642	59.8766	protein_coding
XLOC_052519	Erdr1	122.806	488.503	1082.46	635.355	1857.54	596.532	1203.33	777.319	1329.07	572.691	protein_coding
[truncated: 2 more rows]
