# Supplementary material for: Distinctive features of lincRNA gene expression suggest widespread RNA-independent functions
Source: Life Sci Alliance. 2018 Jul 31;1(4):e201800124. doi: 10.26508/lsa.201800124 (PMC6238598; doi:10.26508/lsa.201800124)
Supplement: Supplementary file 3 [file LSA-2018-00124_TableS3.xlsx]

## Sheet: Table S3 mRNA_lncRNAs.withGeneN
Genes for which expression is correlated with a lincRNA (gene1)
gene1 (lincRNA)	gene2 (correlated expression with gene1)	gene2_name	rho	p.value	FDR
Guttman_lincRNA_516_._Ensembl_ENSMUSG00000086454_._Necsulea_ENSMUSG00000086454	ENSMUSG00000082896	Gm5844	0.745319	2e-06	1.99e-05
Guttman_lincRNA_2551_._Ensembl_ENSMUSG00000078952	ENSMUSG00000082896	Gm5844	0.744105	2e-06	1.99e-05
Guttman_lincRNA_2551_._Ensembl_ENSMUSG00000078952	ENSMUSG00000021270	Hsp90aa1	0.743262	2e-06	1.99e-05
Guttman_lincRNA_516_._Ensembl_ENSMUSG00000086454_._Necsulea_ENSMUSG00000086454	ENSMUSG00000021270	Hsp90aa1	0.740877	2e-06	1.99e-05
Ensembl_ENSMUSG00000092349	ENSMUSG00000078497	Gm13145	0.735472	2e-06	1.99e-05
Guttman_lincRNA_2551_._Ensembl_ENSMUSG00000078952	ENSMUSG00000083899	Gm12346	0.735036	2e-06	1.99e-05
Guttman_lincRNA_516_._Ensembl_ENSMUSG00000086454_._Necsulea_ENSMUSG00000086454	ENSMUSG00000030491	Tdrd12	0.734876	2e-06	1.99e-05
Guttman_lincRNA_2551_._Ensembl_ENSMUSG00000078952	ENSMUSG00000078182	Gm6083	0.734338	2e-06	1.99e-05
Guttman_lincRNA_516_._Ensembl_ENSMUSG00000086454_._Necsulea_ENSMUSG00000086454	ENSMUSG00000083899	Gm12346	0.732852	2e-06	1.99e-05
Guttman_lincRNA_2551_._Ensembl_ENSMUSG00000078952	ENSMUSG00000067919	Rex2	0.731266	2e-06	1.99e-05
Guttman_lincRNA_2551_._Ensembl_ENSMUSG00000078952	ENSMUSG00000030825	Hsd17b14	0.729703	2e-06	1.99e-05
Guttman_lincRNA_516_._Ensembl_ENSMUSG00000086454_._Necsulea_ENSMUSG00000086454	ENSMUSG00000078182	Gm6083	0.727142	2e-06	1.99e-05
Guttman_lincRNA_516_._Ensembl_ENSMUSG00000086454_._Necsulea_ENSMUSG00000086454	ENSMUSG00000032346	Ooep	0.723163	2e-06	1.99e-05
Ensembl_ENSMUSG00000092349	ENSMUSG00000028691	Prdx1	0.722906	2e-06	1.99e-05
Guttman_lincRNA_2280_._Necsulea_CUFF.231493	ENSMUSG00000082896	Gm5844	0.719086	2e-06	1.99e-05
Guttman_lincRNA_2551_._Ensembl_ENSMUSG00000078952	ENSMUSG00000070708	Gtsf1l	0.71737	2e-06	1.99e-05
Guttman_lincRNA_2551_._Ensembl_ENSMUSG00000078952	ENSMUSG00000062518	Zfp534	0.71535	2e-06	1.99e-05
Guttman_lincRNA_2551_._Ensembl_ENSMUSG00000078952	ENSMUSG00000095661	Gm8935	0.715042	2e-06	1.99e-05
Guttman_lincRNA_2551_._Ensembl_ENSMUSG00000078952	ENSMUSG00000032346	Ooep	0.714958	2e-06	1.99e-05
Guttman_lincRNA_2454	ENSMUSG00000083899	Gm12346	0.714734	2e-06	1.99e-05
Guttman_lincRNA_2454	ENSMUSG00000021270	Hsp90aa1	0.713821	2e-06	1.99e-05
Guttman_lincRNA_2551_._Ensembl_ENSMUSG00000078952	ENSMUSG00000078498	Gm13151	0.713768	2e-06	1.99e-05
Guttman_lincRNA_516_._Ensembl_ENSMUSG00000086454_._Necsulea_ENSMUSG00000086454	ENSMUSG00000000486	2001-09-01	0.713701	2e-06	1.99e-05
Guttman_lincRNA_2454	ENSMUSG00000082896	Gm5844	0.713573	2e-06	1.99e-05
Guttman_lincRNA_2280_._Necsulea_CUFF.231493	ENSMUSG00000083899	Gm12346	0.707917	2e-06	1.99e-05
Guttman_lincRNA_2551_._Ensembl_ENSMUSG00000078952	ENSMUSG00000056300	Gm13247	0.705361	2e-06	1.99e-05
Guttman_lincRNA_542_._Ensembl_ENSMUSG00000084762_._Necsulea_ENSMUSG00000084762	ENSMUSG00000067919	Rex2	0.705156	2e-06	1.99e-05
Guttman_lincRNA_2551_._Ensembl_ENSMUSG00000078952	ENSMUSG00000032348	Gsta4	0.70351	2e-06	1.99e-05
Guttman_lincRNA_516_._Ensembl_ENSMUSG00000086454_._Necsulea_ENSMUSG00000086454	ENSMUSG00000032348	Gsta4	0.702623	2e-06	1.99e-05
Guttman_lincRNA_2280_._Necsulea_CUFF.231493	ENSMUSG00000021270	Hsp90aa1	0.702388	2e-06	1.99e-05
Ensembl_ENSMUSG00000092349	ENSMUSG00000066007	Zfp600	0.701133	2e-06	1.99e-05
Guttman_lincRNA_516_._Ensembl_ENSMUSG00000086454_._Necsulea_ENSMUSG00000086454	ENSMUSG00000080241	Gm6269	0.700633	2e-06	1.99e-05
Ensembl_ENSMUSG00000092349	ENSMUSG00000016319	Slc25a5	0.699326	2e-06	1.99e-05
Guttman_lincRNA_2454	ENSMUSG00000067919	Rex2	0.698797	2e-06	1.99e-05
Guttman_lincRNA_516_._Ensembl_ENSMUSG00000086454_._Necsulea_ENSMUSG00000086454	ENSMUSG00000046323	Dppa3	0.697358	2e-06	1.99e-05
Guttman_lincRNA_2551_._Ensembl_ENSMUSG00000078952	ENSMUSG00000031575	Ash2l	0.697247	2e-06	1.99e-05
Guttman_lincRNA_2551_._Ensembl_ENSMUSG00000078952	ENSMUSG00000066007	Zfp600	0.695442	2e-06	1.99e-05
Ensembl_ENSMUSG00000092349	ENSMUSG00000067919	Rex2	0.694289	2e-06	1.99e-05
Guttman_lincRNA_2551_._Ensembl_ENSMUSG00000078952	ENSMUSG00000066009	Gm13051	0.694104	2e-06	1.99e-05
Guttman_lincRNA_2280_._Necsulea_CUFF.231493	ENSMUSG00000067919	Rex2	0.692268	2e-06	1.99e-05
Guttman_lincRNA_542_._Ensembl_ENSMUSG00000084762_._Necsulea_ENSMUSG00000084762	ENSMUSG00000021270	Hsp90aa1	0.691044	2e-06	1.99e-05
Ensembl_ENSMUSG00000092349	ENSMUSG00000054766	Set	0.690527	2e-06	1.99e-05
Guttman_lincRNA_2454	ENSMUSG00000076441	Ass1	0.689698	2e-06	1.99e-05
Guttman_lincRNA_542_._Ensembl_ENSMUSG00000084762_._Necsulea_ENSMUSG00000084762	ENSMUSG00000083899	Gm12346	0.689204	2e-06	1.99e-05
Guttman_lincRNA_2485	ENSMUSG00000095661	Gm8935	0.689102	2e-06	1.99e-05
Guttman_lincRNA_516_._Ensembl_ENSMUSG00000086454_._Necsulea_ENSMUSG00000086454	ENSMUSG00000032495	Lrrc2	0.688809	2e-06	1.99e-05
Guttman_lincRNA_516_._Ensembl_ENSMUSG00000086454_._Necsulea_ENSMUSG00000086454	Guttman_lincRNA_2551_._Ensembl_ENSMUSG00000078952		0.688645	2e-06	1.99e-05
Guttman_lincRNA_2551_._Ensembl_ENSMUSG00000078952	ENSMUSG00000063171	Rps4y2	0.688085	2e-06	1.99e-05
Guttman_lincRNA_516_._Ensembl_ENSMUSG00000086454_._Necsulea_ENSMUSG00000086454	ENSMUSG00000062518	Zfp534	0.687378	2e-06	1.99e-05
Guttman_lincRNA_516_._Ensembl_ENSMUSG00000086454_._Necsulea_ENSMUSG00000086454	ENSMUSG00000056300	Gm13247	0.686657	2e-06	1.99e-05
Guttman_lincRNA_2280_._Necsulea_CUFF.231493	ENSMUSG00000095661	Gm8935	0.686553	2e-06	1.99e-05
Guttman_lincRNA_542_._Ensembl_ENSMUSG00000084762_._Necsulea_ENSMUSG00000084762	ENSMUSG00000082896	Gm5844	0.685911	2e-06	1.99e-05
Guttman_lincRNA_2454	ENSMUSG00000095661	Gm8935	0.684986	2e-06	1.99e-05
Guttman_lincRNA_2551_._Ensembl_ENSMUSG00000078952	ENSMUSG00000055148	Klf2	0.684363	2e-06	1.99e-05
Guttman_lincRNA_516_._Ensembl_ENSMUSG00000086454_._Necsulea_ENSMUSG00000086454	ENSMUSG00000095661	Gm8935	0.684053	2e-06	1.99e-05
Guttman_lincRNA_516_._Ensembl_ENSMUSG00000086454_._Necsulea_ENSMUSG00000086454	ENSMUSG00000092225	Gm2381	0.682486	2e-06	1.99e-05
Guttman_lincRNA_516_._Ensembl_ENSMUSG00000086454_._Necsulea_ENSMUSG00000086454	ENSMUSG00000042367	Gjb3	0.680952	2e-06	1.99e-05
Guttman_lincRNA_2551_._Ensembl_ENSMUSG00000078952	ENSMUSG00000030672	Mylpf	0.68083	2e-06	1.99e-05
Guttman_lincRNA_2551_._Ensembl_ENSMUSG00000078952	ENSMUSG00000080241	Gm6269	0.680807	2e-06	1.99e-05
Necsulea_Locus_99471_._Guttman_lincRNA_674_._Ensembl_ENSMUSG00000097639	ENSMUSG00000095661	Gm8935	0.680191	2e-06	1.99e-05
Guttman_lincRNA_516_._Ensembl_ENSMUSG00000086454_._Necsulea_ENSMUSG00000086454	ENSMUSG00000078498	Gm13151	0.679734	2e-06	1.99e-05
Guttman_lincRNA_2485	ENSMUSG00000067919	Rex2	0.679156	2e-06	1.99e-05
Guttman_lincRNA_2551_._Ensembl_ENSMUSG00000078952	ENSMUSG00000002076	Hsf2bp	0.676944	2e-06	1.99e-05
Guttman_lincRNA_516_._Ensembl_ENSMUSG00000086454_._Necsulea_ENSMUSG00000086454	ENSMUSG00000078503	Gm13225	0.676729	2e-06	1.99e-05
Guttman_lincRNA_2551_._Ensembl_ENSMUSG00000078952	ENSMUSG00000038045	Sult6b1	0.675728	2e-06	1.99e-05
Guttman_lincRNA_2551_._Ensembl_ENSMUSG00000078952	ENSMUSG00000000486	2001-09-01	0.674831	2e-06	1.99e-05
Guttman_lincRNA_2551_._Ensembl_ENSMUSG00000078952	ENSMUSG00000092225	Gm2381	0.67464	2e-06	1.99e-05
Guttman_lincRNA_2454	ENSMUSG00000049422	Chchd10	0.673356	2e-06	1.99e-05
Guttman_lincRNA_516_._Ensembl_ENSMUSG00000086454_._Necsulea_ENSMUSG00000086454	ENSMUSG00000002076	Hsf2bp	0.673159	2e-06	1.99e-05
Guttman_lincRNA_2551_._Ensembl_ENSMUSG00000078952	ENSMUSG00000028691	Prdx1	0.672306	2e-06	1.99e-05
Guttman_lincRNA_2280_._Necsulea_CUFF.231493	ENSMUSG00000078496	Gm13152	0.671757	2e-06	1.99e-05
Guttman_lincRNA_516_._Ensembl_ENSMUSG00000086454_._Necsulea_ENSMUSG00000086454	ENSMUSG00000030117	Gdf3	0.671492	2e-06	1.99e-05
Guttman_lincRNA_2551_._Ensembl_ENSMUSG00000078952	ENSMUSG00000079225	Gm9531	0.670703	2e-06	1.99e-05
Guttman_lincRNA_2551_._Ensembl_ENSMUSG00000078952	ENSMUSG00000078497	Gm13145	0.670126	2e-06	1.99e-05
Guttman_lincRNA_2551_._Ensembl_ENSMUSG00000078952	ENSMUSG00000081037	Gm13929	0.66971	2e-06	1.99e-05
Guttman_lincRNA_2551_._Ensembl_ENSMUSG00000078952	ENSMUSG00000027239	Mdk	-0.669243	2e-06	1.99e-05
Guttman_lincRNA_2551_._Ensembl_ENSMUSG00000078952	ENSMUSG00000078503	Gm13225	0.669217	2e-06	1.99e-05
Guttman_lincRNA_516_._Ensembl_ENSMUSG00000086454_._Necsulea_ENSMUSG00000086454	ENSMUSG00000040564	Apoc1	0.668862	2e-06	1.99e-05
Guttman_lincRNA_2551_._Ensembl_ENSMUSG00000078952	ENSMUSG00000046323	Dppa3	0.668711	2e-06	1.99e-05
Guttman_lincRNA_542_._Ensembl_ENSMUSG00000084762_._Necsulea_ENSMUSG00000084762	ENSMUSG00000066007	Zfp600	0.668264	2e-06	1.99e-05
Guttman_lincRNA_2280_._Necsulea_CUFF.231493	ENSMUSG00000042751	Nmnat2	0.667433	2e-06	1.99e-05
Guttman_lincRNA_516_._Ensembl_ENSMUSG00000086454_._Necsulea_ENSMUSG00000086454	ENSMUSG00000027239	Mdk	-0.667414	2e-06	1.99e-05
Guttman_lincRNA_2280_._Necsulea_CUFF.231493	ENSMUSG00000027239	Mdk	-0.667397	2e-06	1.99e-05
Guttman_lincRNA_2280_._Necsulea_CUFF.231493	ENSMUSG00000038045	Sult6b1	0.667109	2e-06	1.99e-05
Guttman_lincRNA_516_._Ensembl_ENSMUSG00000086454_._Necsulea_ENSMUSG00000086454	ENSMUSG00000070708	Gtsf1l	0.665744	2e-06	1.99e-05
Guttman_lincRNA_2280_._Necsulea_CUFF.231493	Guttman_lincRNA_2454		0.665024	2e-06	1.99e-05
Guttman_lincRNA_516_._Ensembl_ENSMUSG00000086454_._Necsulea_ENSMUSG00000086454	ENSMUSG00000025492	Ifitm3	0.664777	2e-06	1.99e-05
Guttman_lincRNA_2551_._Ensembl_ENSMUSG00000078952	ENSMUSG00000032495	Lrrc2	0.664734	2e-06	1.99e-05
Guttman_lincRNA_2551_._Ensembl_ENSMUSG00000078952	ENSMUSG00000038872	Zfhx3	-0.664329	2e-06	1.99e-05
Guttman_lincRNA_516_._Ensembl_ENSMUSG00000086454_._Necsulea_ENSMUSG00000086454	ENSMUSG00000074637	Sox2	0.664309	2e-06	1.99e-05
Guttman_lincRNA_2485	ENSMUSG00000083899	Gm12346	0.664302	2e-06	1.99e-05
Necsulea_Locus_99471_._Guttman_lincRNA_674_._Ensembl_ENSMUSG00000097639	ENSMUSG00000067919	Rex2	0.664289	2e-06	1.99e-05
Guttman_lincRNA_2551_._Ensembl_ENSMUSG00000078952	ENSMUSG00000024406	Pou5f1	0.663536	2e-06	1.99e-05
Guttman_lincRNA_2551_._Ensembl_ENSMUSG00000078952	ENSMUSG00000029249	Rest	0.663457	2e-06	1.99e-05
Necsulea_Locus_99471_._Guttman_lincRNA_674_._Ensembl_ENSMUSG00000097639	ENSMUSG00000066007	Zfp600	0.663382	2e-06	1.99e-05
Guttman_lincRNA_2280_._Necsulea_CUFF.231493	ENSMUSG00000030793	Pycard	0.663321	2e-06	1.99e-05
Guttman_lincRNA_2551_._Ensembl_ENSMUSG00000078952	ENSMUSG00000027077	Smtnl1	0.663078	2e-06	1.99e-05
Guttman_lincRNA_2454	Guttman_lincRNA_542_._Ensembl_ENSMUSG00000084762_._Necsulea_ENSMUSG00000084762		0.662977	2e-06	1.99e-05
Guttman_lincRNA_2551_._Ensembl_ENSMUSG00000078952	ENSMUSG00000054766	Set	0.662916	2e-06	1.99e-05
Guttman_lincRNA_516_._Ensembl_ENSMUSG00000086454_._Necsulea_ENSMUSG00000086454	ENSMUSG00000067919	Rex2	0.662612	2e-06	1.99e-05
Guttman_lincRNA_2454	ENSMUSG00000030793	Pycard	0.662465	2e-06	1.99e-05
Guttman_lincRNA_516_._Ensembl_ENSMUSG00000086454_._Necsulea_ENSMUSG00000086454	ENSMUSG00000038587	Akap12	0.661943	2e-06	1.99e-05
Guttman_lincRNA_2280_._Necsulea_CUFF.231493	ENSMUSG00000076441	Ass1	0.661825	2e-06	1.99e-05
Ensembl_ENSMUSG00000092349	ENSMUSG00000005566	Trim28	0.661594	2e-06	1.99e-05
Guttman_lincRNA_2485	ENSMUSG00000021270	Hsp90aa1	0.661526	2e-06	1.99e-05
Guttman_lincRNA_2454	ENSMUSG00000066007	Zfp600	0.661324	2e-06	1.99e-05
Guttman_lincRNA_2485	ENSMUSG00000066007	Zfp600	0.66127	2e-06	1.99e-05
Guttman_lincRNA_2551_._Ensembl_ENSMUSG00000078952	ENSMUSG00000082082	Gm13230	0.660614	2e-06	1.99e-05
Ensembl_ENSMUSG00000092349	ENSMUSG00000021270	Hsp90aa1	0.660503	2e-06	1.99e-05
Guttman_lincRNA_2551_._Ensembl_ENSMUSG00000078952	ENSMUSG00000058186	Gm13242	0.660116	2e-06	1.99e-05
Guttman_lincRNA_2280_._Necsulea_CUFF.231493	Guttman_lincRNA_542_._Ensembl_ENSMUSG00000084762_._Necsulea_ENSMUSG00000084762		0.659759	2e-06	1.99e-05
Guttman_lincRNA_2551_._Ensembl_ENSMUSG00000078952	ENSMUSG00000024422	Dhx16	0.658679	2e-06	1.99e-05
Necsulea_Locus_99471_._Guttman_lincRNA_674_._Ensembl_ENSMUSG00000097639	ENSMUSG00000078497	Gm13145	0.658445	2e-06	1.99e-05
Guttman_lincRNA_2280_._Necsulea_CUFF.231493	ENSMUSG00000066007	Zfp600	0.65819	2e-06	1.99e-05
Guttman_lincRNA_2454	ENSMUSG00000038045	Sult6b1	0.657113	2e-06	1.99e-05
Guttman_lincRNA_516_._Ensembl_ENSMUSG00000086454_._Necsulea_ENSMUSG00000086454	ENSMUSG00000024725	Ostf1	0.656524	2e-06	1.99e-05
Guttman_lincRNA_2485	ENSMUSG00000082896	Gm5844	0.656401	2e-06	1.99e-05
Ensembl_ENSMUSG00000092349	ENSMUSG00000083899	Gm12346	0.656197	2e-06	1.99e-05
Guttman_lincRNA_516_._Ensembl_ENSMUSG00000086454_._Necsulea_ENSMUSG00000086454	ENSMUSG00000055148	Klf2	0.65603	2e-06	1.99e-05
Guttman_lincRNA_516_._Ensembl_ENSMUSG00000086454_._Necsulea_ENSMUSG00000086454	ENSMUSG00000049422	Chchd10	0.655142	2e-06	1.99e-05
Guttman_lincRNA_2280_._Necsulea_CUFF.231493	ENSMUSG00000055148	Klf2	0.654032	2e-06	1.99e-05
Guttman_lincRNA_516_._Ensembl_ENSMUSG00000086454_._Necsulea_ENSMUSG00000086454	ENSMUSG00000082082	Gm13230	0.65372	2e-06	1.99e-05
Guttman_lincRNA_2551_._Ensembl_ENSMUSG00000078952	ENSMUSG00000013236	Ptprs	-0.653506	2e-06	1.99e-05
Guttman_lincRNA_542_._Ensembl_ENSMUSG00000084762_._Necsulea_ENSMUSG00000084762	ENSMUSG00000076441	Ass1	0.653275	2e-06	1.99e-05
Guttman_lincRNA_2485	ENSMUSG00000027239	Mdk	-0.652488	2e-06	1.99e-05
Guttman_lincRNA_2551_._Ensembl_ENSMUSG00000078952	ENSMUSG00000030793	Pycard	0.65238	2e-06	1.99e-05
Guttman_lincRNA_2280_._Necsulea_CUFF.231493	ENSMUSG00000049422	Chchd10	0.652163	2e-06	1.99e-05
Guttman_lincRNA_2551_._Ensembl_ENSMUSG00000078952	ENSMUSG00000076441	Ass1	0.652041	2e-06	1.99e-05
Guttman_lincRNA_2280_._Necsulea_CUFF.231493	ENSMUSG00000030619	Eed	0.651763	2e-06	1.99e-05
Guttman_lincRNA_516_._Ensembl_ENSMUSG00000086454_._Necsulea_ENSMUSG00000086454	ENSMUSG00000038045	Sult6b1	0.650181	2e-06	1.99e-05
Guttman_lincRNA_516_._Ensembl_ENSMUSG00000086454_._Necsulea_ENSMUSG00000086454	ENSMUSG00000026288	Inpp5d	0.649756	2e-06	1.99e-05
Guttman_lincRNA_2551_._Ensembl_ENSMUSG00000078952	ENSMUSG00000005370	Msh6	0.649662	2e-06	1.99e-05
Guttman_lincRNA_2551_._Ensembl_ENSMUSG00000078952	ENSMUSG00000026288	Inpp5d	0.649443	2e-06	1.99e-05
Necsulea_Locus_99471_._Guttman_lincRNA_674_._Ensembl_ENSMUSG00000097639	ENSMUSG00000024406	Pou5f1	0.649006	2e-06	1.99e-05
Guttman_lincRNA_2551_._Ensembl_ENSMUSG00000078952	ENSMUSG00000038028	9630033F20Rik	0.648344	2e-06	1.99e-05
Guttman_lincRNA_2551_._Ensembl_ENSMUSG00000078952	ENSMUSG00000078496	Gm13152	0.64828	2e-06	1.99e-05
Guttman_lincRNA_2454	ENSMUSG00000040564	Apoc1	0.647826	2e-06	1.99e-05
Guttman_lincRNA_2551_._Ensembl_ENSMUSG00000078952	ENSMUSG00000040564	Apoc1	0.64724	2e-06	1.99e-05
Guttman_lincRNA_2551_._Ensembl_ENSMUSG00000078952	ENSMUSG00000022682	Rrn3	0.647227	2e-06	1.99e-05
Guttman_lincRNA_542_._Ensembl_ENSMUSG00000084762_._Necsulea_ENSMUSG00000084762	ENSMUSG00000049422	Chchd10	0.646443	2e-06	1.99e-05
Guttman_lincRNA_2551_._Ensembl_ENSMUSG00000078952	ENSMUSG00000064194	Zfp936	0.646056	2e-06	1.99e-05
Guttman_lincRNA_1447	ENSMUSG00000056300	Gm13247	0.64578	2e-06	1.99e-05
Guttman_lincRNA_1716_._Ensembl_ENSMUSG00000074303	ENSMUSG00000027239	Mdk	-0.64546	2e-06	1.99e-05
Guttman_lincRNA_516_._Ensembl_ENSMUSG00000086454_._Necsulea_ENSMUSG00000086454	ENSMUSG00000038028	9630033F20Rik	0.645009	2e-06	1.99e-05
Guttman_lincRNA_516_._Ensembl_ENSMUSG00000086454_._Necsulea_ENSMUSG00000086454	ENSMUSG00000005370	Msh6	0.644978	2e-06	1.99e-05
Guttman_lincRNA_2485	ENSMUSG00000078497	Gm13145	0.644706	2e-06	1.99e-05
Guttman_lincRNA_516_._Ensembl_ENSMUSG00000086454_._Necsulea_ENSMUSG00000086454	ENSMUSG00000066009	Gm13051	0.644668	2e-06	1.99e-05
Ensembl_ENSMUSG00000092349	ENSMUSG00000082896	Gm5844	0.644642	2e-06	1.99e-05
Guttman_lincRNA_2280_._Necsulea_CUFF.231493	ENSMUSG00000000486	2001-09-01	0.643289	2e-06	1.99e-05
Guttman_lincRNA_2280_._Necsulea_CUFF.231493	ENSMUSG00000041718	Alg13	0.643105	2e-06	1.99e-05
Guttman_lincRNA_542_._Ensembl_ENSMUSG00000084762_._Necsulea_ENSMUSG00000084762	ENSMUSG00000052776	Oas1a	0.642991	2e-06	1.99e-05
Necsulea_Locus_99471_._Guttman_lincRNA_674_._Ensembl_ENSMUSG00000097639	ENSMUSG00000028691	Prdx1	0.642823	2e-06	1.99e-05
Guttman_lincRNA_2454	ENSMUSG00000078496	Gm13152	0.642491	2e-06	1.99e-05
Guttman_lincRNA_516_._Ensembl_ENSMUSG00000086454_._Necsulea_ENSMUSG00000086454	ENSMUSG00000078495	Gm13157	0.642378	2e-06	1.99e-05
Guttman_lincRNA_2454	ENSMUSG00000042751	Nmnat2	0.641825	2e-06	1.99e-05
Guttman_lincRNA_516_._Ensembl_ENSMUSG00000086454_._Necsulea_ENSMUSG00000086454	Guttman_lincRNA_2454		0.641776	2e-06	1.99e-05
Guttman_lincRNA_2551_._Ensembl_ENSMUSG00000078952	ENSMUSG00000017861	Mybl2	0.64121	2e-06	1.99e-05
Guttman_lincRNA_2551_._Ensembl_ENSMUSG00000078952	Guttman_lincRNA_2454		0.640569	2e-06	1.99e-05
Ensembl_ENSMUSG00000092349	ENSMUSG00000022682	Rrn3	0.640405	2e-06	1.99e-05
Guttman_lincRNA_2280_._Necsulea_CUFF.231493	ENSMUSG00000078497	Gm13145	0.639816	2e-06	1.99e-05
Necsulea_Locus_99471_._Guttman_lincRNA_674_._Ensembl_ENSMUSG00000097639	ENSMUSG00000076441	Ass1	0.63943	2e-06	1.99e-05
Guttman_lincRNA_516_._Ensembl_ENSMUSG00000086454_._Necsulea_ENSMUSG00000086454	ENSMUSG00000063171	Rps4y2	0.638371	2e-06	1.99e-05
Guttman_lincRNA_542_._Ensembl_ENSMUSG00000084762_._Necsulea_ENSMUSG00000084762	ENSMUSG00000030793	Pycard	0.638239	2e-06	1.99e-05
Guttman_lincRNA_2280_._Necsulea_CUFF.231493	ENSMUSG00000001228	Uhrf1	0.637824	2e-06	1.99e-05
Guttman_lincRNA_2551_._Ensembl_ENSMUSG00000078952	ENSMUSG00000017453	Pipox	0.637528	2e-06	1.99e-05
Guttman_lincRNA_2454	ENSMUSG00000031490	Eif4ebp1	0.63732	2e-06	1.99e-05
Necsulea_Locus_99471_._Guttman_lincRNA_674_._Ensembl_ENSMUSG00000097639	ENSMUSG00000092225	Gm2381	0.637052	2e-06	1.99e-05
Guttman_lincRNA_2551_._Ensembl_ENSMUSG00000078952	ENSMUSG00000072419	Dppa2	0.637045	2e-06	1.99e-05
Guttman_lincRNA_2280_._Necsulea_CUFF.231493	ENSMUSG00000037860	Aim2	0.636775	2e-06	1.99e-05
Guttman_lincRNA_2280_._Necsulea_CUFF.231493	ENSMUSG00000040564	Apoc1	0.635256	2e-06	1.99e-05
Guttman_lincRNA_516_._Ensembl_ENSMUSG00000086454_._Necsulea_ENSMUSG00000086454	ENSMUSG00000024422	Dhx16	0.634997	2e-06	1.99e-05
Guttman_lincRNA_2551_._Ensembl_ENSMUSG00000078952	ENSMUSG00000030619	Eed	0.634968	2e-06	1.99e-05
Guttman_lincRNA_516_._Ensembl_ENSMUSG00000086454_._Necsulea_ENSMUSG00000086454	ENSMUSG00000054766	Set	0.634901	2e-06	1.99e-05
Guttman_lincRNA_1447	ENSMUSG00000032348	Gsta4	0.634507	2e-06	1.99e-05
Guttman_lincRNA_516_._Ensembl_ENSMUSG00000086454_._Necsulea_ENSMUSG00000086454	ENSMUSG00000073403	Gm10499	0.634449	2e-06	1.99e-05
Guttman_lincRNA_2454	ENSMUSG00000013236	Ptprs	-0.634377	2e-06	1.99e-05
Guttman_lincRNA_2280_._Necsulea_CUFF.231493	ENSMUSG00000005148	Klf5	0.634308	2e-06	1.99e-05
Guttman_lincRNA_1447	ENSMUSG00000021270	Hsp90aa1	0.633927	2e-06	1.99e-05
Guttman_lincRNA_516_._Ensembl_ENSMUSG00000086454_._Necsulea_ENSMUSG00000086454	Guttman_lincRNA_1447		0.633594	2e-06	1.99e-05
Guttman_lincRNA_2454	ENSMUSG00000078497	Gm13145	0.633588	2e-06	1.99e-05
Guttman_lincRNA_2551_._Ensembl_ENSMUSG00000078952	Guttman_lincRNA_2280_._Necsulea_CUFF.231493		0.633309	2e-06	1.99e-05
Guttman_lincRNA_2454	ENSMUSG00000052776	Oas1a	0.63296	2e-06	1.99e-05
Guttman_lincRNA_2551_._Ensembl_ENSMUSG00000078952	ENSMUSG00000003849	Nqo1	0.632713	2e-06	1.99e-05
Guttman_lincRNA_2454	ENSMUSG00000005148	Klf5	0.632249	2e-06	1.99e-05
Guttman_lincRNA_2551_._Ensembl_ENSMUSG00000078952	ENSMUSG00000009585	Apobec3	0.632016	2e-06	1.99e-05
Guttman_lincRNA_516_._Ensembl_ENSMUSG00000086454_._Necsulea_ENSMUSG00000086454	ENSMUSG00000078496	Gm13152	0.63135	2e-06	1.99e-05
Guttman_lincRNA_1716_._Ensembl_ENSMUSG00000074303	ENSMUSG00000024406	Pou5f1	0.63109	2e-06	1.99e-05
Guttman_lincRNA_2280_._Necsulea_CUFF.231493	ENSMUSG00000024725	Ostf1	0.630849	2e-06	1.99e-05
Guttman_lincRNA_516_._Ensembl_ENSMUSG00000086454_._Necsulea_ENSMUSG00000086454	ENSMUSG00000063856	Gpx1	0.630844	2e-06	1.99e-05
Guttman_lincRNA_516_._Ensembl_ENSMUSG00000086454_._Necsulea_ENSMUSG00000086454	ENSMUSG00000058186	Gm13242	0.630658	2e-06	1.99e-05
Guttman_lincRNA_516_._Ensembl_ENSMUSG00000086454_._Necsulea_ENSMUSG00000086454	ENSMUSG00000030619	Eed	0.630587	2e-06	1.99e-05
Ensembl_ENSMUSG00000092349	ENSMUSG00000013236	Ptprs	-0.630467	2e-06	1.99e-05
Guttman_lincRNA_2551_._Ensembl_ENSMUSG00000078952	ENSMUSG00000023902	Zscan10	0.63012	2e-06	1.99e-05
Guttman_lincRNA_516_._Ensembl_ENSMUSG00000086454_._Necsulea_ENSMUSG00000086454	ENSMUSG00000001228	Uhrf1	0.629643	2e-06	1.99e-05
Guttman_lincRNA_2551_._Ensembl_ENSMUSG00000078952	Guttman_lincRNA_2485		0.629506	2e-06	1.99e-05
Guttman_lincRNA_2551_._Ensembl_ENSMUSG00000078952	ENSMUSG00000020424	Gatsl3	0.629393	2e-06	1.99e-05
Guttman_lincRNA_516_._Ensembl_ENSMUSG00000086454_._Necsulea_ENSMUSG00000086454	ENSMUSG00000009585	Apobec3	0.6293	2e-06	1.99e-05
Guttman_lincRNA_516_._Ensembl_ENSMUSG00000086454_._Necsulea_ENSMUSG00000086454	Guttman_lincRNA_542_._Ensembl_ENSMUSG00000084762_._Necsulea_ENSMUSG00000084762		0.629204	2e-06	1.99e-05
Guttman_lincRNA_2280_._Necsulea_CUFF.231493	ENSMUSG00000028773	Fabp3	0.628941	2e-06	1.99e-05
Guttman_lincRNA_516_._Ensembl_ENSMUSG00000086454_._Necsulea_ENSMUSG00000086454	ENSMUSG00000013236	Ptprs	-0.628796	2e-06	1.99e-05
Guttman_lincRNA_2454	ENSMUSG00000063856	Gpx1	0.628563	2e-06	1.99e-05
Guttman_lincRNA_2551_._Ensembl_ENSMUSG00000078952	ENSMUSG00000063856	Gpx1	0.628558	2e-06	1.99e-05
Guttman_lincRNA_2454	ENSMUSG00000001604	Tcea3	0.628446	2e-06	1.99e-05
Guttman_lincRNA_1447	ENSMUSG00000082896	Gm5844	0.628268	2e-06	1.99e-05
Guttman_lincRNA_2551_._Ensembl_ENSMUSG00000078952	Guttman_lincRNA_542_._Ensembl_ENSMUSG00000084762_._Necsulea_ENSMUSG00000084762		0.62815	2e-06	1.99e-05
Guttman_lincRNA_1447	ENSMUSG00000062518	Zfp534	0.628141	2e-06	1.99e-05
Guttman_lincRNA_2280_._Necsulea_CUFF.231493	ENSMUSG00000006818	Sod2	0.627966	2e-06	1.99e-05
Guttman_lincRNA_2551_._Ensembl_ENSMUSG00000078952	ENSMUSG00000016319	Slc25a5	0.627354	2e-06	1.99e-05
Guttman_lincRNA_516_._Ensembl_ENSMUSG00000086454_._Necsulea_ENSMUSG00000086454	ENSMUSG00000066007	Zfp600	0.627186	2e-06	1.99e-05
Guttman_lincRNA_2280_._Necsulea_CUFF.231493	ENSMUSG00000078495	Gm13157	0.627149	2e-06	1.99e-05
Ensembl_ENSMUSG00000056579_._Guttman_lincRNA_2207_._Ensembl_ENSMUSG00000099081_._Ensembl_ENSMUSG00000098265_._Ensembl_ENSMUSG00000098503_._Ensembl_ENSMUSG00000098948	ENSMUSG00000028691	Prdx1	-0.626477	2e-06	1.99e-05
Guttman_lincRNA_516_._Ensembl_ENSMUSG00000086454_._Necsulea_ENSMUSG00000086454	ENSMUSG00000029267	Mtf2	0.626409	2e-06	1.99e-05
Guttman_lincRNA_542_._Ensembl_ENSMUSG00000084762_._Necsulea_ENSMUSG00000084762	ENSMUSG00000054766	Set	0.62629	2e-06	1.99e-05
Necsulea_Locus_99471_._Guttman_lincRNA_674_._Ensembl_ENSMUSG00000097639	ENSMUSG00000001604	Tcea3	0.626275	2e-06	1.99e-05
Guttman_lincRNA_2551_._Ensembl_ENSMUSG00000078952	Ensembl_ENSMUSG00000092349		0.6258	2e-06	1.99e-05
Guttman_lincRNA_2280_._Necsulea_CUFF.231493	Guttman_lincRNA_2485		0.625797	2e-06	1.99e-05
Guttman_lincRNA_2551_._Ensembl_ENSMUSG00000078952	ENSMUSG00000058550	Dppa4	0.625467	2e-06	1.99e-05
Guttman_lincRNA_2551_._Ensembl_ENSMUSG00000078952	ENSMUSG00000049422	Chchd10	0.625224	2e-06	1.99e-05
Guttman_lincRNA_2454	ENSMUSG00000079225	Gm9531	0.624734	2e-06	1.99e-05
Guttman_lincRNA_2280_._Necsulea_CUFF.231493	ENSMUSG00000033983	Coil	0.624588	2e-06	1.99e-05
Guttman_lincRNA_2551_._Ensembl_ENSMUSG00000078952	ENSMUSG00000047146	Tet1	0.624472	2e-06	1.99e-05
Guttman_lincRNA_516_._Ensembl_ENSMUSG00000086454_._Necsulea_ENSMUSG00000086454	ENSMUSG00000027077	Smtnl1	0.624416	2e-06	1.99e-05
Guttman_lincRNA_2551_._Ensembl_ENSMUSG00000078952	ENSMUSG00000025056	Nr0b1	0.624316	2e-06	1.99e-05
Guttman_lincRNA_2280_._Necsulea_CUFF.231493	ENSMUSG00000058186	Gm13242	0.623935	2e-06	1.99e-05
Guttman_lincRNA_2551_._Ensembl_ENSMUSG00000078952	ENSMUSG00000023942	Slc29a1	0.623805	2e-06	1.99e-05
Guttman_lincRNA_516_._Ensembl_ENSMUSG00000086454_._Necsulea_ENSMUSG00000086454	ENSMUSG00000041718	Alg13	0.62379	2e-06	1.99e-05
Guttman_lincRNA_2551_._Ensembl_ENSMUSG00000078952	Necsulea_Locus_99471_._Guttman_lincRNA_674_._Ensembl_ENSMUSG00000097639		0.623735	2e-06	1.99e-05
Guttman_lincRNA_516_._Ensembl_ENSMUSG00000086454_._Necsulea_ENSMUSG00000086454	ENSMUSG00000027018	Hat1	0.623444	2e-06	1.99e-05
Guttman_lincRNA_1447	ENSMUSG00000083899	Gm12346	0.623365	2e-06	1.99e-05
Guttman_lincRNA_2454	ENSMUSG00000054766	Set	0.623271	2e-06	1.99e-05
Guttman_lincRNA_516_._Ensembl_ENSMUSG00000086454_._Necsulea_ENSMUSG00000086454	ENSMUSG00000031584	Gsr	0.623242	2e-06	1.99e-05
Guttman_lincRNA_2551_._Ensembl_ENSMUSG00000078952	ENSMUSG00000025492	Ifitm3	0.622833	2e-06	1.99e-05
Necsulea_Locus_99471_._Guttman_lincRNA_674_._Ensembl_ENSMUSG00000097639	ENSMUSG00000083899	Gm12346	0.62264	2e-06	1.99e-05
Guttman_lincRNA_2280_._Necsulea_CUFF.231493	ENSMUSG00000081766	2210409E12Rik	0.62262	2e-06	1.99e-05
Necsulea_Locus_99471_._Guttman_lincRNA_674_._Ensembl_ENSMUSG00000097639	ENSMUSG00000021270	Hsp90aa1	0.622618	2e-06	1.99e-05
Guttman_lincRNA_1447	ENSMUSG00000067919	Rex2	0.621576	2e-06	1.99e-05
Guttman_lincRNA_2280_._Necsulea_CUFF.231493	ENSMUSG00000074637	Sox2	0.621573	2e-06	1.99e-05
Guttman_lincRNA_2454	ENSMUSG00000029249	Rest	0.621525	2e-06	1.99e-05
Guttman_lincRNA_516_._Ensembl_ENSMUSG00000086454_._Necsulea_ENSMUSG00000086454	ENSMUSG00000038872	Zfhx3	-0.621419	2e-06	1.99e-05
Guttman_lincRNA_2280_._Necsulea_CUFF.231493	ENSMUSG00000052776	Oas1a	0.621153	2e-06	1.99e-05
Guttman_lincRNA_2551_._Ensembl_ENSMUSG00000078952	ENSMUSG00000028773	Fabp3	0.620931	2e-06	1.99e-05
Guttman_lincRNA_2280_._Necsulea_CUFF.231493	ENSMUSG00000063856	Gpx1	0.620576	2e-06	1.99e-05
Ensembl_ENSMUSG00000092349	ENSMUSG00000064194	Zfp936	0.620163	2e-06	1.99e-05
Guttman_lincRNA_2551_._Ensembl_ENSMUSG00000078952	ENSMUSG00000056366	Fabp3-ps1	0.619845	2e-06	1.99e-05
Guttman_lincRNA_2551_._Ensembl_ENSMUSG00000078952	ENSMUSG00000091490	Triml2	0.619704	2e-06	1.99e-05
Guttman_lincRNA_2280_._Necsulea_CUFF.231493	ENSMUSG00000025423	Pias2	0.619608	2e-06	1.99e-05
Guttman_lincRNA_1716_._Ensembl_ENSMUSG00000074303	ENSMUSG00000043629	1700019D03Rik	0.619599	2e-06	1.99e-05
Guttman_lincRNA_2551_._Ensembl_ENSMUSG00000078952	ENSMUSG00000036202	Rif1	0.619102	2e-06	1.99e-05
Guttman_lincRNA_2551_._Ensembl_ENSMUSG00000078952	ENSMUSG00000022048	Dpysl2	-0.61817	2e-06	1.99e-05
Guttman_lincRNA_516_._Ensembl_ENSMUSG00000086454_._Necsulea_ENSMUSG00000086454	ENSMUSG00000006818	Sod2	0.618141	2e-06	1.99e-05
Guttman_lincRNA_2551_._Ensembl_ENSMUSG00000078952	ENSMUSG00000022474	Pmm1	0.618133	2e-06	1.99e-05
Guttman_lincRNA_2551_._Ensembl_ENSMUSG00000078952	ENSMUSG00000079471	Gm7325	0.61809	2e-06	1.99e-05
Necsulea_Locus_99471_._Guttman_lincRNA_674_._Ensembl_ENSMUSG00000097639	ENSMUSG00000082896	Gm5844	0.617459	2e-06	1.99e-05
Guttman_lincRNA_2280_._Necsulea_CUFF.231493	ENSMUSG00000039682	Lap3	0.617211	2e-06	1.99e-05
Guttman_lincRNA_2551_._Ensembl_ENSMUSG00000078952	ENSMUSG00000074637	Sox2	0.616998	2e-06	1.99e-05
Guttman_lincRNA_2551_._Ensembl_ENSMUSG00000078952	ENSMUSG00000067860	Zic3	0.616813	2e-06	1.99e-05
Guttman_lincRNA_2280_._Necsulea_CUFF.231493	ENSMUSG00000022682	Rrn3	0.616759	2e-06	1.99e-05
Guttman_lincRNA_516_._Ensembl_ENSMUSG00000086454_._Necsulea_ENSMUSG00000086454	ENSMUSG00000013089	Etv5	0.616715	2e-06	1.99e-05
Guttman_lincRNA_2280_._Necsulea_CUFF.231493	ENSMUSG00000079225	Gm9531	0.61668	2e-06	1.99e-05
Guttman_lincRNA_2485	ENSMUSG00000022682	Rrn3	0.616676	2e-06	1.99e-05
Guttman_lincRNA_1447	ENSMUSG00000066009	Gm13051	0.616673	2e-06	1.99e-05
Guttman_lincRNA_2551_._Ensembl_ENSMUSG00000078952	ENSMUSG00000042367	Gjb3	0.616564	2e-06	1.99e-05
Guttman_lincRNA_2551_._Ensembl_ENSMUSG00000078952	ENSMUSG00000055653	Gpc3	-0.616375	2e-06	1.99e-05
Guttman_lincRNA_2485	ENSMUSG00000078496	Gm13152	0.616269	2e-06	1.99e-05
Guttman_lincRNA_2280_._Necsulea_CUFF.231493	ENSMUSG00000042357	Gjb5	0.616008	2e-06	1.99e-05
Guttman_lincRNA_2485	ENSMUSG00000028691	Prdx1	0.615945	2e-06	1.99e-05
Guttman_lincRNA_2551_._Ensembl_ENSMUSG00000078952	ENSMUSG00000087207	Gm13147	0.615915	2e-06	1.99e-05
Guttman_lincRNA_516_._Ensembl_ENSMUSG00000086454_._Necsulea_ENSMUSG00000086454	ENSMUSG00000025491	Ifitm1	0.615897	2e-06	1.99e-05
Guttman_lincRNA_2280_._Necsulea_CUFF.231493	ENSMUSG00000076431	Sox4	-0.61587	2e-06	1.99e-05
Guttman_lincRNA_516_._Ensembl_ENSMUSG00000086454_._Necsulea_ENSMUSG00000086454	ENSMUSG00000030672	Mylpf	0.615802	2e-06	1.99e-05
Guttman_lincRNA_2454	ENSMUSG00000018411	Mapt	0.615579	2e-06	1.99e-05
Guttman_lincRNA_2280_._Necsulea_CUFF.231493	ENSMUSG00000001604	Tcea3	0.615553	2e-06	1.99e-05
Guttman_lincRNA_2454	ENSMUSG00000079471	Gm7325	0.615505	2e-06	1.99e-05
Guttman_lincRNA_2485	Guttman_lincRNA_2454		0.615483	2e-06	1.99e-05
Guttman_lincRNA_516_._Ensembl_ENSMUSG00000086454_._Necsulea_ENSMUSG00000086454	ENSMUSG00000042751	Nmnat2	0.614335	2e-06	1.99e-05
Guttman_lincRNA_2280_._Necsulea_CUFF.231493	ENSMUSG00000027018	Hat1	0.614085	2e-06	1.99e-05
Guttman_lincRNA_542_._Ensembl_ENSMUSG00000084762_._Necsulea_ENSMUSG00000084762	ENSMUSG00000042751	Nmnat2	0.613842	2e-06	1.99e-05
Guttman_lincRNA_2280_._Necsulea_CUFF.231493	ENSMUSG00000031490	Eif4ebp1	0.613487	2e-06	1.99e-05
Necsulea_Locus_99471_._Guttman_lincRNA_674_._Ensembl_ENSMUSG00000097639	ENSMUSG00000028773	Fabp3	0.613481	2e-06	1.99e-05
Guttman_lincRNA_2551_._Ensembl_ENSMUSG00000078952	ENSMUSG00000044626	Liph	0.613266	2e-06	1.99e-05
Guttman_lincRNA_516_._Ensembl_ENSMUSG00000086454_._Necsulea_ENSMUSG00000086454	ENSMUSG00000022040	Ephx2	0.613148	2e-06	1.99e-05
Guttman_lincRNA_2551_._Ensembl_ENSMUSG00000078952	ENSMUSG00000039395	Mreg	0.613058	2e-06	1.99e-05
Guttman_lincRNA_2551_._Ensembl_ENSMUSG00000078952	ENSMUSG00000062929	Cfl2	-0.613032	2e-06	1.99e-05
Guttman_lincRNA_516_._Ensembl_ENSMUSG00000086454_._Necsulea_ENSMUSG00000086454	ENSMUSG00000064194	Zfp936	0.612829	2e-06	1.99e-05
Guttman_lincRNA_2551_._Ensembl_ENSMUSG00000078952	ENSMUSG00000025255	Zfhx4	-0.612563	2e-06	1.99e-05
Guttman_lincRNA_2485	ENSMUSG00000055148	Klf2	0.612529	2e-06	1.99e-05
Guttman_lincRNA_2551_._Ensembl_ENSMUSG00000078952	ENSMUSG00000074887	EU599041	0.612442	2e-06	1.99e-05
Guttman_lincRNA_516_._Ensembl_ENSMUSG00000086454_._Necsulea_ENSMUSG00000086454	ENSMUSG00000024406	Pou5f1	0.612428	2e-06	1.99e-05
Guttman_lincRNA_516_._Ensembl_ENSMUSG00000086454_._Necsulea_ENSMUSG00000086454	ENSMUSG00000081037	Gm13929	0.612425	2e-06	1.99e-05
Guttman_lincRNA_2454	ENSMUSG00000073403	Gm10499	0.612371	2e-06	1.99e-05
Guttman_lincRNA_516_._Ensembl_ENSMUSG00000086454_._Necsulea_ENSMUSG00000086454	ENSMUSG00000018727	Cpsf4l	0.612332	2e-06	1.99e-05
Guttman_lincRNA_2551_._Ensembl_ENSMUSG00000078952	ENSMUSG00000038587	Akap12	0.612183	2e-06	1.99e-05
Guttman_lincRNA_542_._Ensembl_ENSMUSG00000084762_._Necsulea_ENSMUSG00000084762	ENSMUSG00000078497	Gm13145	0.612103	2e-06	1.99e-05
Guttman_lincRNA_2551_._Ensembl_ENSMUSG00000078952	ENSMUSG00000001604	Tcea3	0.612096	2e-06	1.99e-05
Guttman_lincRNA_2485	ENSMUSG00000079225	Gm9531	0.612019	2e-06	1.99e-05
Guttman_lincRNA_516_._Ensembl_ENSMUSG00000086454_._Necsulea_ENSMUSG00000086454	ENSMUSG00000030825	Hsd17b14	0.611741	2e-06	1.99e-05
Guttman_lincRNA_516_._Ensembl_ENSMUSG00000086454_._Necsulea_ENSMUSG00000086454	ENSMUSG00000037860	Aim2	0.611564	2e-06	1.99e-05
Ensembl_ENSMUSG00000000031_._Ensembl_ENSMUSG00000099143_._Ensembl_ENSMUSG00000098816	ENSMUSG00000046687	Gm5424	-0.61135	2e-06	1.99e-05
Guttman_lincRNA_2551_._Ensembl_ENSMUSG00000078952	ENSMUSG00000021322	Aoah	0.611283	2e-06	1.99e-05
Guttman_lincRNA_516_._Ensembl_ENSMUSG00000086454_._Necsulea_ENSMUSG00000086454	ENSMUSG00000087207	Gm13147	0.611214	2e-06	1.99e-05
Guttman_lincRNA_2280_._Necsulea_CUFF.231493	ENSMUSG00000024406	Pou5f1	0.611102	2e-06	1.99e-05
Guttman_lincRNA_1447	ENSMUSG00000095661	Gm8935	0.610878	2e-06	1.99e-05
Guttman_lincRNA_2551_._Ensembl_ENSMUSG00000078952	ENSMUSG00000006818	Sod2	0.610839	2e-06	1.99e-05
Necsulea_Locus_22428_._Guttman_lincRNA_2851_._Necsulea_Locus_21016	ENSMUSG00000063171	Rps4y2	0.610774	2e-06	1.99e-05
Guttman_lincRNA_516_._Ensembl_ENSMUSG00000086454_._Necsulea_ENSMUSG00000086454	Guttman_lincRNA_2485		0.610346	2e-06	1.99e-05
Ensembl_ENSMUSG00000000031_._Ensembl_ENSMUSG00000099143_._Ensembl_ENSMUSG00000098816	ENSMUSG00000078182	Gm6083	-0.610341	2e-06	1.99e-05
Necsulea_Locus_99471_._Guttman_lincRNA_674_._Ensembl_ENSMUSG00000097639	ENSMUSG00000020424	Gatsl3	0.610249	2e-06	1.99e-05
Guttman_lincRNA_2280_._Necsulea_CUFF.231493	ENSMUSG00000092225	Gm2381	0.60984	2e-06	1.99e-05
Guttman_lincRNA_2551_._Ensembl_ENSMUSG00000078952	ENSMUSG00000076431	Sox4	-0.609513	2e-06	1.99e-05
Guttman_lincRNA_516_._Ensembl_ENSMUSG00000086454_._Necsulea_ENSMUSG00000086454	ENSMUSG00000030793	Pycard	0.609453	2e-06	1.99e-05
Guttman_lincRNA_516_._Ensembl_ENSMUSG00000086454_._Necsulea_ENSMUSG00000086454	ENSMUSG00000079225	Gm9531	0.609429	2e-06	1.99e-05
Guttman_lincRNA_2551_._Ensembl_ENSMUSG00000078952	ENSMUSG00000029007	Agtrap	0.609104	2e-06	1.99e-05
Guttman_lincRNA_2280_._Necsulea_CUFF.231493	ENSMUSG00000055653	Gpc3	-0.609093	2e-06	1.99e-05
Ensembl_ENSMUSG00000000031_._Ensembl_ENSMUSG00000099143_._Ensembl_ENSMUSG00000098816	ENSMUSG00000076441	Ass1	-0.609077	2e-06	1.99e-05
Guttman_lincRNA_2454	ENSMUSG00000074887	EU599041	0.608548	2e-06	1.99e-05
Guttman_lincRNA_516_._Ensembl_ENSMUSG00000086454_._Necsulea_ENSMUSG00000086454	ENSMUSG00000042357	Gjb5	0.608307	2e-06	1.99e-05
Guttman_lincRNA_2551_._Ensembl_ENSMUSG00000078952	ENSMUSG00000078495	Gm13157	0.60828	2e-06	1.99e-05
Guttman_lincRNA_516_._Ensembl_ENSMUSG00000086454_._Necsulea_ENSMUSG00000086454	ENSMUSG00000052776	Oas1a	0.60822	2e-06	1.99e-05
Guttman_lincRNA_516_._Ensembl_ENSMUSG00000086454_._Necsulea_ENSMUSG00000086454	Guttman_lincRNA_2280_._Necsulea_CUFF.231493		0.608069	2e-06	1.99e-05
Guttman_lincRNA_2280_._Necsulea_CUFF.231493	ENSMUSG00000079471	Gm7325	0.607786	2e-06	1.99e-05
Guttman_lincRNA_2454	ENSMUSG00000041548	Hspb8	0.607734	2e-06	1.99e-05
Guttman_lincRNA_2280_._Necsulea_CUFF.231493	ENSMUSG00000036202	Rif1	0.607665	2e-06	1.99e-05
Guttman_lincRNA_516_._Ensembl_ENSMUSG00000086454_._Necsulea_ENSMUSG00000086454	ENSMUSG00000022034	Esco2	0.607583	2e-06	1.99e-05
Ensembl_ENSMUSG00000092349	ENSMUSG00000027077	Smtnl1	0.607449	2e-06	1.99e-05
Guttman_lincRNA_2551_._Ensembl_ENSMUSG00000078952	ENSMUSG00000032387	Rbpms2	0.607346	2e-06	1.99e-05
Necsulea_Locus_99471_._Guttman_lincRNA_674_._Ensembl_ENSMUSG00000097639	ENSMUSG00000047751	Utf1	0.607306	2e-06	1.99e-05
Guttman_lincRNA_1447	ENSMUSG00000032346	Ooep	0.607136	2e-06	1.99e-05
Guttman_lincRNA_2551_._Ensembl_ENSMUSG00000078952	ENSMUSG00000001228	Uhrf1	0.607119	2e-06	1.99e-05
Guttman_lincRNA_2280_._Necsulea_CUFF.231493	ENSMUSG00000030722	Nfatc2ip	0.606898	2e-06	1.99e-05
Guttman_lincRNA_2485	ENSMUSG00000063856	Gpx1	0.60686	2e-06	1.99e-05
Guttman_lincRNA_2551_._Ensembl_ENSMUSG00000078952	ENSMUSG00000046402	Rbp1	-0.606791	2e-06	1.99e-05
Guttman_lincRNA_2280_._Necsulea_CUFF.231493	ENSMUSG00000074887	EU599041	0.606756	2e-06	1.99e-05
Guttman_lincRNA_2551_._Ensembl_ENSMUSG00000078952	ENSMUSG00000022034	Esco2	0.606713	2e-06	1.99e-05
Guttman_lincRNA_1447	ENSMUSG00000021322	Aoah	0.606705	2e-06	1.99e-05
Guttman_lincRNA_1716_._Ensembl_ENSMUSG00000074303	ENSMUSG00000038587	Akap12	0.606654	2e-06	1.99e-05
Guttman_lincRNA_516_._Ensembl_ENSMUSG00000086454_._Necsulea_ENSMUSG00000086454	ENSMUSG00000032387	Rbpms2	0.606572	2e-06	1.99e-05
Guttman_lincRNA_2551_._Ensembl_ENSMUSG00000078952	ENSMUSG00000027018	Hat1	0.606552	2e-06	1.99e-05
Guttman_lincRNA_2551_._Ensembl_ENSMUSG00000078952	ENSMUSG00000059552	Trp53	0.605952	2e-06	1.99e-05
Ensembl_ENSMUSG00000000031_._Ensembl_ENSMUSG00000099143_._Ensembl_ENSMUSG00000098816	ENSMUSG00000031490	Eif4ebp1	-0.605834	2e-06	1.99e-05
Guttman_lincRNA_2454	ENSMUSG00000027077	Smtnl1	0.605476	2e-06	1.99e-05
Guttman_lincRNA_2551_._Ensembl_ENSMUSG00000078952	ENSMUSG00000052957	Gas1	-0.605235	2e-06	1.99e-05
Ensembl_ENSMUSG00000000031_._Ensembl_ENSMUSG00000099143_._Ensembl_ENSMUSG00000098816	ENSMUSG00000021270	Hsp90aa1	-0.605211	2e-06	1.99e-05
Guttman_lincRNA_2551_._Ensembl_ENSMUSG00000078952	ENSMUSG00000051747	Ttn	0.605005	2e-06	1.99e-05
Ensembl_ENSMUSG00000000031_._Ensembl_ENSMUSG00000099143_._Ensembl_ENSMUSG00000098816	ENSMUSG00000083899	Gm12346	-0.604958	2e-06	1.99e-05
Guttman_lincRNA_2454	ENSMUSG00000036202	Rif1	0.60482	2e-06	1.99e-05
Guttman_lincRNA_2454	ENSMUSG00000029007	Agtrap	0.604773	2e-06	1.99e-05
Ensembl_ENSMUSG00000000031_._Ensembl_ENSMUSG00000099143_._Ensembl_ENSMUSG00000098816	ENSMUSG00000082896	Gm5844	-0.60462	2e-06	1.99e-05
Guttman_lincRNA_2551_._Ensembl_ENSMUSG00000078952	ENSMUSG00000037935	Smarce1	-0.604529	2e-06	1.99e-05
Guttman_lincRNA_2551_._Ensembl_ENSMUSG00000078952	Guttman_lincRNA_1447		0.604522	2e-06	1.99e-05
Guttman_lincRNA_2174	ENSMUSG00000021270	Hsp90aa1	0.604516	2e-06	1.99e-05
Guttman_lincRNA_2280_._Necsulea_CUFF.231493	ENSMUSG00000028601	Echdc2	0.604279	2e-06	1.99e-05
Guttman_lincRNA_2551_._Ensembl_ENSMUSG00000078952	ENSMUSG00000079560	Hoxa3	-0.604248	2e-06	1.99e-05
Guttman_lincRNA_516_._Ensembl_ENSMUSG00000086454_._Necsulea_ENSMUSG00000086454	ENSMUSG00000030342	Cd9	0.604014	2e-06	1.99e-05
Guttman_lincRNA_516_._Ensembl_ENSMUSG00000086454_._Necsulea_ENSMUSG00000086454	ENSMUSG00000023150	Ivns1abp	-0.603656	2e-06	1.99e-05
Guttman_lincRNA_2551_._Ensembl_ENSMUSG00000078952	ENSMUSG00000073403	Gm10499	0.603102	2e-06	1.99e-05
Necsulea_Locus_99471_._Guttman_lincRNA_674_._Ensembl_ENSMUSG00000097639	ENSMUSG00000030793	Pycard	0.602944	2e-06	1.99e-05
Guttman_lincRNA_2485	ENSMUSG00000049422	Chchd10	0.602663	2e-06	1.99e-05
Guttman_lincRNA_2280_._Necsulea_CUFF.231493	ENSMUSG00000073403	Gm10499	0.602558	2e-06	1.99e-05
Guttman_lincRNA_516_._Ensembl_ENSMUSG00000086454_._Necsulea_ENSMUSG00000086454	ENSMUSG00000078497	Gm13145	0.602544	2e-06	1.99e-05
Guttman_lincRNA_1716_._Ensembl_ENSMUSG00000074303	ENSMUSG00000042751	Nmnat2	0.602487	2e-06	1.99e-05
Guttman_lincRNA_2485	ENSMUSG00000001604	Tcea3	0.602393	2e-06	1.99e-05
Necsulea_Locus_99471_._Guttman_lincRNA_674_._Ensembl_ENSMUSG00000097639	Guttman_lincRNA_2485		0.602344	2e-06	1.99e-05
Guttman_lincRNA_2174	ENSMUSG00000082896	Gm5844	0.602152	2e-06	1.99e-05
Guttman_lincRNA_516_._Ensembl_ENSMUSG00000086454_._Necsulea_ENSMUSG00000086454	ENSMUSG00000032999	Nlrp4f	0.601748	2e-06	1.99e-05
Guttman_lincRNA_2174	ENSMUSG00000083899	Gm12346	0.601697	2e-06	1.99e-05
Necsulea_Locus_99471_._Guttman_lincRNA_674_._Ensembl_ENSMUSG00000097639	ENSMUSG00000022682	Rrn3	0.6016	2e-06	1.99e-05
Guttman_lincRNA_2280_._Necsulea_CUFF.231493	ENSMUSG00000037935	Smarce1	-0.601574	2e-06	1.99e-05
Ensembl_ENSMUSG00000092349	ENSMUSG00000025364	Pa2g4	0.601413	2e-06	1.99e-05
Necsulea_Locus_99471_._Guttman_lincRNA_674_._Ensembl_ENSMUSG00000097639	ENSMUSG00000030619	Eed	0.601294	2e-06	1.99e-05
Guttman_lincRNA_2454	ENSMUSG00000022682	Rrn3	0.600875	2e-06	1.99e-05
Guttman_lincRNA_2454	ENSMUSG00000025423	Pias2	0.600719	2e-06	1.99e-05
Necsulea_Locus_99471_._Guttman_lincRNA_674_._Ensembl_ENSMUSG00000097639	ENSMUSG00000049422	Chchd10	0.600522	2e-06	1.99e-05
Guttman_lincRNA_516_._Ensembl_ENSMUSG00000086454_._Necsulea_ENSMUSG00000086454	ENSMUSG00000076441	Ass1	0.600455	2e-06	1.99e-05
Guttman_lincRNA_1716_._Ensembl_ENSMUSG00000074303	ENSMUSG00000032387	Rbpms2	0.600201	2e-06	1.99e-05
Guttman_lincRNA_2551_._Ensembl_ENSMUSG00000078952	ENSMUSG00000095834	Tdgf1-ps1	0.600085	2e-06	1.99e-05
Guttman_lincRNA_516_._Ensembl_ENSMUSG00000086454_._Necsulea_ENSMUSG00000086454	ENSMUSG00000023902	Zscan10	0.600079	2e-06	1.99e-05
Guttman_lincRNA_2485	Guttman_lincRNA_542_._Ensembl_ENSMUSG00000084762_._Necsulea_ENSMUSG00000084762		0.600057	2e-06	1.99e-05
Guttman_lincRNA_1447	ENSMUSG00000032495	Lrrc2	0.599995	2e-06	1.99e-05
Guttman_lincRNA_516_._Ensembl_ENSMUSG00000086454_._Necsulea_ENSMUSG00000086454	ENSMUSG00000007817	Zmiz1	-0.599865	2e-06	1.99e-05
Guttman_lincRNA_1716_._Ensembl_ENSMUSG00000074303	ENSMUSG00000082896	Gm5844	0.599857	2e-06	1.99e-05
Guttman_lincRNA_2551_._Ensembl_ENSMUSG00000078952	ENSMUSG00000005148	Klf5	0.599728	2e-06	1.99e-05
Guttman_lincRNA_1716_._Ensembl_ENSMUSG00000074303	ENSMUSG00000095661	Gm8935	0.599429	2e-06	1.99e-05
Guttman_lincRNA_2551_._Ensembl_ENSMUSG00000078952	ENSMUSG00000042751	Nmnat2	0.599379	2e-06	1.99e-05
Guttman_lincRNA_542_._Ensembl_ENSMUSG00000084762_._Necsulea_ENSMUSG00000084762	ENSMUSG00000013236	Ptprs	-0.599352	2e-06	1.99e-05
Guttman_lincRNA_2551_._Ensembl_ENSMUSG00000078952	ENSMUSG00000038253	Hoxa5	-0.599188	2e-06	1.99e-05
Ensembl_ENSMUSG00000000031_._Ensembl_ENSMUSG00000099143_._Ensembl_ENSMUSG00000098816	ENSMUSG00000038028	9630033F20Rik	-0.599083	2e-06	1.99e-05
Guttman_lincRNA_2551_._Ensembl_ENSMUSG00000078952	ENSMUSG00000028807	Zbtb8a	0.598964	2e-06	1.99e-05
Guttman_lincRNA_2280_._Necsulea_CUFF.231493	ENSMUSG00000032397	Tipin	0.598898	2e-06	1.99e-05
Guttman_lincRNA_2485	ENSMUSG00000076441	Ass1	0.598839	2e-06	1.99e-05
Guttman_lincRNA_2485	ENSMUSG00000061062	Gm10093	0.598739	2e-06	1.99e-05
Guttman_lincRNA_516_._Ensembl_ENSMUSG00000086454_._Necsulea_ENSMUSG00000086454	ENSMUSG00000000365	Rnf17	0.598267	2e-06	1.99e-05
Guttman_lincRNA_2551_._Ensembl_ENSMUSG00000078952	ENSMUSG00000007379	Dennd2c	0.597962	2e-06	1.99e-05
Guttman_lincRNA_2551_._Ensembl_ENSMUSG00000078952	ENSMUSG00000041718	Alg13	0.597913	2e-06	1.99e-05
Guttman_lincRNA_2280_._Necsulea_CUFF.231493	ENSMUSG00000018411	Mapt	0.597893	2e-06	1.99e-05
Guttman_lincRNA_516_._Ensembl_ENSMUSG00000086454_._Necsulea_ENSMUSG00000086454	ENSMUSG00000026202	Tuba4a	0.597846	2e-06	1.99e-05
Necsulea_Locus_99471_._Guttman_lincRNA_674_._Ensembl_ENSMUSG00000097639	ENSMUSG00000079471	Gm7325	0.597688	2e-06	1.99e-05
Guttman_lincRNA_516_._Ensembl_ENSMUSG00000086454_._Necsulea_ENSMUSG00000086454	ENSMUSG00000038172	Ttc39b	0.597682	2e-06	1.99e-05
Guttman_lincRNA_516_._Ensembl_ENSMUSG00000086454_._Necsulea_ENSMUSG00000086454	ENSMUSG00000076431	Sox4	-0.597602	2e-06	1.99e-05
Necsulea_Locus_99471_._Guttman_lincRNA_674_._Ensembl_ENSMUSG00000097639	ENSMUSG00000040785	Ttc3	-0.597581	2e-06	1.99e-05
Guttman_lincRNA_516_._Ensembl_ENSMUSG00000086454_._Necsulea_ENSMUSG00000086454	ENSMUSG00000028691	Prdx1	0.597556	2e-06	1.99e-05
Guttman_lincRNA_2551_._Ensembl_ENSMUSG00000078952	ENSMUSG00000021767	Kat6b	0.59749	2e-06	1.99e-05
Guttman_lincRNA_2485	ENSMUSG00000073403	Gm10499	0.59748	2e-06	1.99e-05
Guttman_lincRNA_516_._Ensembl_ENSMUSG00000086454_._Necsulea_ENSMUSG00000086454	ENSMUSG00000030722	Nfatc2ip	0.597174	2e-06	1.99e-05
Guttman_lincRNA_2280_._Necsulea_CUFF.231493	ENSMUSG00000022272	Myo10	0.597138	2e-06	1.99e-05
Guttman_lincRNA_2551_._Ensembl_ENSMUSG00000078952	ENSMUSG00000030536	Iqgap1	0.597034	2e-06	1.99e-05
Ensembl_ENSMUSG00000000031_._Ensembl_ENSMUSG00000099143_._Ensembl_ENSMUSG00000098816	ENSMUSG00000078503	Gm13225	-0.597033	2e-06	1.99e-05
Guttman_lincRNA_2485	ENSMUSG00000054766	Set	0.596816	2e-06	1.99e-05
Guttman_lincRNA_2454	ENSMUSG00000029267	Mtf2	0.596566	2e-06	1.99e-05
Guttman_lincRNA_2551_._Ensembl_ENSMUSG00000078952	ENSMUSG00000032397	Tipin	0.59651	2e-06	1.99e-05
Necsulea_Locus_99471_._Guttman_lincRNA_674_._Ensembl_ENSMUSG00000097639	ENSMUSG00000027018	Hat1	0.596459	2e-06	1.99e-05
Guttman_lincRNA_2280_._Necsulea_CUFF.231493	ENSMUSG00000031651	Triml1	0.596291	2e-06	1.99e-05
Necsulea_CUFF.216203_._Ensembl_ENSMUSG00000098202_._Necsulea_CUFF.216208	ENSMUSG00000065757	Gm23347	0.59623	2e-06	1.99e-05
Ensembl_ENSMUSG00000092349	ENSMUSG00000020089	Ppa1	0.596215	2e-06	1.99e-05
Guttman_lincRNA_2551_._Ensembl_ENSMUSG00000078952	ENSMUSG00000028601	Echdc2	0.596089	2e-06	1.99e-05
Guttman_lincRNA_516_._Ensembl_ENSMUSG00000086454_._Necsulea_ENSMUSG00000086454	ENSMUSG00000022272	Myo10	0.596001	2e-06	1.99e-05
Guttman_lincRNA_542_._Ensembl_ENSMUSG00000084762_._Necsulea_ENSMUSG00000084762	ENSMUSG00000079471	Gm7325	0.595924	2e-06	1.99e-05
Guttman_lincRNA_2551_._Ensembl_ENSMUSG00000078952	ENSMUSG00000020644	Id2	-0.595768	2e-06	1.99e-05
Necsulea_Locus_99471_._Guttman_lincRNA_674_._Ensembl_ENSMUSG00000097639	ENSMUSG00000027239	Mdk	-0.595636	2e-06	1.99e-05
Guttman_lincRNA_516_._Ensembl_ENSMUSG00000086454_._Necsulea_ENSMUSG00000086454	ENSMUSG00000091490	Triml2	0.595476	2e-06	1.99e-05
Necsulea_Locus_99471_._Guttman_lincRNA_674_._Ensembl_ENSMUSG00000097639	ENSMUSG00000038692	Hoxb4	-0.594966	2e-06	1.99e-05
Guttman_lincRNA_2551_._Ensembl_ENSMUSG00000078952	ENSMUSG00000025764	Phf17	0.594934	2e-06	1.99e-05
Guttman_lincRNA_1447	ENSMUSG00000030825	Hsd17b14	0.594784	2e-06	1.99e-05
Guttman_lincRNA_2454	ENSMUSG00000028691	Prdx1	0.594782	2e-06	1.99e-05
Guttman_lincRNA_2551_._Ensembl_ENSMUSG00000078952	ENSMUSG00000038692	Hoxb4	-0.594771	2e-06	1.99e-05
Ensembl_ENSMUSG00000000031_._Ensembl_ENSMUSG00000099143_._Ensembl_ENSMUSG00000098816	ENSMUSG00000049422	Chchd10	-0.594765	2e-06	1.99e-05
Necsulea_Locus_99471_._Guttman_lincRNA_674_._Ensembl_ENSMUSG00000097639	ENSMUSG00000079225	Gm9531	0.594684	2e-06	1.99e-05
Guttman_lincRNA_516_._Ensembl_ENSMUSG00000086454_._Necsulea_ENSMUSG00000086454	ENSMUSG00000007379	Dennd2c	0.59466	2e-06	1.99e-05
Ensembl_ENSMUSG00000000031_._Ensembl_ENSMUSG00000099143_._Ensembl_ENSMUSG00000098816	ENSMUSG00000021255	Esrrb	-0.594553	2e-06	1.99e-05
Guttman_lincRNA_516_._Ensembl_ENSMUSG00000086454_._Necsulea_ENSMUSG00000086454	ENSMUSG00000031139	Mcf2	0.59451	2e-06	1.99e-05
Guttman_lincRNA_516_._Ensembl_ENSMUSG00000086454_._Necsulea_ENSMUSG00000086454	ENSMUSG00000017861	Mybl2	0.594428	2e-06	1.99e-05
Ensembl_ENSMUSG00000000031_._Ensembl_ENSMUSG00000099143_._Ensembl_ENSMUSG00000098816	ENSMUSG00000081037	Gm13929	-0.593997	2e-06	1.99e-05
Guttman_lincRNA_2551_._Ensembl_ENSMUSG00000078952	ENSMUSG00000005566	Trim28	0.593863	2e-06	1.99e-05
Ensembl_ENSMUSG00000000031_._Ensembl_ENSMUSG00000099143_._Ensembl_ENSMUSG00000098816	ENSMUSG00000095661	Gm8935	-0.593637	2e-06	1.99e-05
Necsulea_Locus_99471_._Guttman_lincRNA_674_._Ensembl_ENSMUSG00000097639	ENSMUSG00000029249	Rest	0.593473	2e-06	1.99e-05
Guttman_lincRNA_2280_._Necsulea_CUFF.231493	ENSMUSG00000029007	Agtrap	0.593402	2e-06	1.99e-05
Guttman_lincRNA_2551_._Ensembl_ENSMUSG00000078952	ENSMUSG00000058571	Gpc6	-0.593304	2e-06	1.99e-05
Guttman_lincRNA_516_._Ensembl_ENSMUSG00000086454_._Necsulea_ENSMUSG00000086454	ENSMUSG00000020424	Gatsl3	0.592975	2e-06	1.99e-05
Guttman_lincRNA_2551_._Ensembl_ENSMUSG00000078952	ENSMUSG00000042808	Gpx2	0.592806	2e-06	1.99e-05
Guttman_lincRNA_516_._Ensembl_ENSMUSG00000086454_._Necsulea_ENSMUSG00000086454	ENSMUSG00000031403	Dkc1	0.592716	2e-06	1.99e-05
Guttman_lincRNA_2174	ENSMUSG00000067919	Rex2	0.592685	2e-06	1.99e-05
Guttman_lincRNA_516_._Ensembl_ENSMUSG00000086454_._Necsulea_ENSMUSG00000086454	ENSMUSG00000022682	Rrn3	0.592676	2e-06	1.99e-05
Guttman_lincRNA_1447	ENSMUSG00000054766	Set	0.592544	2e-06	1.99e-05
Guttman_lincRNA_1716_._Ensembl_ENSMUSG00000074303	ENSMUSG00000076441	Ass1	0.592076	2e-06	1.99e-05
Guttman_lincRNA_2454	ENSMUSG00000081766	2210409E12Rik	0.592065	2e-06	1.99e-05
Ensembl_ENSMUSG00000000031_._Ensembl_ENSMUSG00000099143_._Ensembl_ENSMUSG00000098816	ENSMUSG00000062518	Zfp534	-0.591966	2e-06	1.99e-05
Guttman_lincRNA_2551_._Ensembl_ENSMUSG00000078952	ENSMUSG00000033863	Klf9	0.591932	2e-06	1.99e-05
Guttman_lincRNA_1447	ENSMUSG00000038045	Sult6b1	0.591799	2e-06	1.99e-05
Guttman_lincRNA_2280_._Necsulea_CUFF.231493	ENSMUSG00000029267	Mtf2	0.591784	2e-06	1.99e-05
Guttman_lincRNA_2551_._Ensembl_ENSMUSG00000078952	ENSMUSG00000017491	Rarb	-0.591637	2e-06	1.99e-05
Guttman_lincRNA_1716_._Ensembl_ENSMUSG00000074303	ENSMUSG00000083899	Gm12346	0.591457	2e-06	1.99e-05
Ensembl_ENSMUSG00000000031_._Ensembl_ENSMUSG00000099143_._Ensembl_ENSMUSG00000098816	ENSMUSG00000024406	Pou5f1	-0.591224	2e-06	1.99e-05
Guttman_lincRNA_2280_._Necsulea_CUFF.231493	ENSMUSG00000013236	Ptprs	-0.591173	2e-06	1.99e-05
Guttman_lincRNA_2280_._Necsulea_CUFF.231493	ENSMUSG00000032279	Idh3a	0.59114	2e-06	1.99e-05
Guttman_lincRNA_2454	ENSMUSG00000061062	Gm10093	0.591078	2e-06	1.99e-05
Guttman_lincRNA_1716_._Ensembl_ENSMUSG00000074303	ENSMUSG00000030793	Pycard	0.590951	2e-06	1.99e-05
Ensembl_ENSMUSG00000000031_._Ensembl_ENSMUSG00000099143_._Ensembl_ENSMUSG00000098816	ENSMUSG00000053062	Jam2	-0.590542	2e-06	1.99e-05
Guttman_lincRNA_2485	ENSMUSG00000044626	Liph	0.590434	2e-06	1.99e-05
Guttman_lincRNA_516_._Ensembl_ENSMUSG00000086454_._Necsulea_ENSMUSG00000086454	ENSMUSG00000015354	Pcolce2	0.590268	2e-06	1.99e-05
Guttman_lincRNA_516_._Ensembl_ENSMUSG00000086454_._Necsulea_ENSMUSG00000086454	ENSMUSG00000017491	Rarb	-0.590265	2e-06	1.99e-05
Guttman_lincRNA_1716_._Ensembl_ENSMUSG00000074303	ENSMUSG00000001604	Tcea3	0.590154	2e-06	1.99e-05
Guttman_lincRNA_2551_._Ensembl_ENSMUSG00000078952	ENSMUSG00000069662	Marcks	-0.589914	2e-06	1.99e-05
Necsulea_Locus_99471_._Guttman_lincRNA_674_._Ensembl_ENSMUSG00000097639	ENSMUSG00000055653	Gpc3	-0.58977	2e-06	1.99e-05
Guttman_lincRNA_516_._Ensembl_ENSMUSG00000086454_._Necsulea_ENSMUSG00000086454	ENSMUSG00000031575	Ash2l	0.589491	2e-06	1.99e-05
Guttman_lincRNA_516_._Ensembl_ENSMUSG00000086454_._Necsulea_ENSMUSG00000086454	ENSMUSG00000074887	EU599041	0.589366	2e-06	1.99e-05
Guttman_lincRNA_516_._Ensembl_ENSMUSG00000086454_._Necsulea_ENSMUSG00000086454	ENSMUSG00000038253	Hoxa5	-0.589304	2e-06	1.99e-05
Guttman_lincRNA_516_._Ensembl_ENSMUSG00000086454_._Necsulea_ENSMUSG00000086454	ENSMUSG00000025056	Nr0b1	0.589287	2e-06	1.99e-05
Guttman_lincRNA_2551_._Ensembl_ENSMUSG00000078952	ENSMUSG00000027210	Meis2	-0.589217	2e-06	1.99e-05
Ensembl_ENSMUSG00000092349	ENSMUSG00000001056	Nhp2	0.589145	2e-06	1.99e-05
Guttman_lincRNA_2551_._Ensembl_ENSMUSG00000078952	ENSMUSG00000023150	Ivns1abp	-0.589083	2e-06	1.99e-05
Guttman_lincRNA_2280_._Necsulea_CUFF.231493	ENSMUSG00000031403	Dkc1	0.588893	2e-06	1.99e-05
Guttman_lincRNA_516_._Ensembl_ENSMUSG00000086454_._Necsulea_ENSMUSG00000086454	ENSMUSG00000002847	Pla1a	0.588845	2e-06	1.99e-05
Guttman_lincRNA_2551_._Ensembl_ENSMUSG00000078952	ENSMUSG00000032999	Nlrp4f	0.588741	2e-06	1.99e-05
Guttman_lincRNA_1447	ENSMUSG00000063171	Rps4y2	0.588567	2e-06	1.99e-05
Guttman_lincRNA_542_._Ensembl_ENSMUSG00000084762_._Necsulea_ENSMUSG00000084762	ENSMUSG00000031490	Eif4ebp1	0.588235	2e-06	1.99e-05
Ensembl_ENSMUSG00000092349	ENSMUSG00000079471	Gm7325	0.5882	2e-06	1.99e-05
Guttman_lincRNA_516_._Ensembl_ENSMUSG00000086454_._Necsulea_ENSMUSG00000086454	ENSMUSG00000039682	Lap3	0.588095	2e-06	1.99e-05
Guttman_lincRNA_1447	ENSMUSG00000070708	Gtsf1l	0.588007	2e-06	1.99e-05
Guttman_lincRNA_2551_._Ensembl_ENSMUSG00000078952	ENSMUSG00000047751	Utf1	0.587852	2e-06	1.99e-05
Guttman_lincRNA_542_._Ensembl_ENSMUSG00000084762_._Necsulea_ENSMUSG00000084762	ENSMUSG00000031403	Dkc1	0.587742	2e-06	1.99e-05
Guttman_lincRNA_2551_._Ensembl_ENSMUSG00000078952	ENSMUSG00000031490	Eif4ebp1	0.587666	2e-06	1.99e-05
Guttman_lincRNA_516_._Ensembl_ENSMUSG00000086454_._Necsulea_ENSMUSG00000086454	ENSMUSG00000018411	Mapt	0.587565	2e-06	1.99e-05
Guttman_lincRNA_516_._Ensembl_ENSMUSG00000086454_._Necsulea_ENSMUSG00000086454	ENSMUSG00000029249	Rest	0.5875	2e-06	1.99e-05
Guttman_lincRNA_1716_._Ensembl_ENSMUSG00000074303	ENSMUSG00000021270	Hsp90aa1	0.587482	2e-06	1.99e-05
Ensembl_ENSMUSG00000000031_._Ensembl_ENSMUSG00000099143_._Ensembl_ENSMUSG00000098816	ENSMUSG00000080241	Gm6269	-0.587468	2e-06	1.99e-05
Ensembl_ENSMUSG00000092349	ENSMUSG00000001604	Tcea3	0.587314	2e-06	1.99e-05
Guttman_lincRNA_516_._Ensembl_ENSMUSG00000086454_._Necsulea_ENSMUSG00000086454	ENSMUSG00000016319	Slc25a5	0.586873	2e-06	1.99e-05
Guttman_lincRNA_2551_._Ensembl_ENSMUSG00000078952	ENSMUSG00000038172	Ttc39b	0.586762	2e-06	1.99e-05
Guttman_lincRNA_1716_._Ensembl_ENSMUSG00000074303	ENSMUSG00000079560	Hoxa3	-0.586713	2e-06	1.99e-05
Guttman_lincRNA_516_._Ensembl_ENSMUSG00000086454_._Necsulea_ENSMUSG00000086454	ENSMUSG00000072419	Dppa2	0.586711	2e-06	1.99e-05
Ensembl_ENSMUSG00000000031_._Ensembl_ENSMUSG00000099143_._Ensembl_ENSMUSG00000098816	ENSMUSG00000030793	Pycard	-0.586611	2e-06	1.99e-05
Ensembl_ENSMUSG00000000031_._Ensembl_ENSMUSG00000099143_._Ensembl_ENSMUSG00000098816	ENSMUSG00000042751	Nmnat2	-0.586533	2e-06	1.99e-05
Guttman_lincRNA_516_._Ensembl_ENSMUSG00000086454_._Necsulea_ENSMUSG00000086454	ENSMUSG00000028601	Echdc2	0.586264	2e-06	1.99e-05
Necsulea_Locus_99471_._Guttman_lincRNA_674_._Ensembl_ENSMUSG00000097639	ENSMUSG00000000942	Hoxa4	-0.586172	2e-06	1.99e-05
Guttman_lincRNA_2280_._Necsulea_CUFF.231493	ENSMUSG00000029249	Rest	0.586163	2e-06	1.99e-05
Guttman_lincRNA_1447	ENSMUSG00000025492	Ifitm3	0.586012	2e-06	1.99e-05
Guttman_lincRNA_516_._Ensembl_ENSMUSG00000086454_._Necsulea_ENSMUSG00000086454	ENSMUSG00000005148	Klf5	0.585729	2e-06	1.99e-05
Guttman_lincRNA_2485	ENSMUSG00000031490	Eif4ebp1	0.585581	2e-06	1.99e-05
Guttman_lincRNA_516_._Ensembl_ENSMUSG00000086454_._Necsulea_ENSMUSG00000086454	ENSMUSG00000095193	Gm20939	0.585281	2e-06	1.99e-05
Guttman_lincRNA_2280_._Necsulea_CUFF.231493	ENSMUSG00000044626	Liph	0.584989	2e-06	1.99e-05
Guttman_lincRNA_2551_._Ensembl_ENSMUSG00000078952	ENSMUSG00000007817	Zmiz1	-0.584633	2e-06	1.99e-05
Guttman_lincRNA_516_._Ensembl_ENSMUSG00000086454_._Necsulea_ENSMUSG00000086454	ENSMUSG00000056366	Fabp3-ps1	0.584561	2e-06	1.99e-05
Guttman_lincRNA_2551_._Ensembl_ENSMUSG00000078952	ENSMUSG00000030826	Bcat2	0.584539	2e-06	1.99e-05
Necsulea_Locus_99471_._Guttman_lincRNA_674_._Ensembl_ENSMUSG00000097639	ENSMUSG00000036202	Rif1	0.584447	2e-06	1.99e-05
Guttman_lincRNA_516_._Ensembl_ENSMUSG00000086454_._Necsulea_ENSMUSG00000086454	ENSMUSG00000003849	Nqo1	0.584436	2e-06	1.99e-05
Guttman_lincRNA_2551_._Ensembl_ENSMUSG00000078952	ENSMUSG00000031139	Mcf2	0.58436	2e-06	1.99e-05
Necsulea_Locus_22428_._Guttman_lincRNA_2851_._Necsulea_Locus_21016	ENSMUSG00000078497	Gm13145	0.584047	2e-06	1.99e-05
Ensembl_ENSMUSG00000000031_._Ensembl_ENSMUSG00000099143_._Ensembl_ENSMUSG00000098816	Guttman_lincRNA_2280_._Necsulea_CUFF.231493		-0.58403	2e-06	1.99e-05
Ensembl_ENSMUSG00000000031_._Ensembl_ENSMUSG00000099143_._Ensembl_ENSMUSG00000098816	ENSMUSG00000047146	Tet1	-0.583934	2e-06	1.99e-05
Guttman_lincRNA_2551_._Ensembl_ENSMUSG00000078952	ENSMUSG00000026202	Tuba4a	0.583835	2e-06	1.99e-05
Guttman_lincRNA_516_._Ensembl_ENSMUSG00000086454_._Necsulea_ENSMUSG00000086454	ENSMUSG00000025937	Lactb2	0.58378	2e-06	1.99e-05
Necsulea_Locus_99471_._Guttman_lincRNA_674_._Ensembl_ENSMUSG00000097639	ENSMUSG00000040564	Apoc1	0.583737	2e-06	1.99e-05
Guttman_lincRNA_516_._Ensembl_ENSMUSG00000086454_._Necsulea_ENSMUSG00000086454	ENSMUSG00000021322	Aoah	0.583505	2e-06	1.99e-05
Ensembl_ENSMUSG00000000031_._Ensembl_ENSMUSG00000099143_._Ensembl_ENSMUSG00000098816	ENSMUSG00000005148	Klf5	-0.583464	2e-06	1.99e-05
Guttman_lincRNA_2280_._Necsulea_CUFF.231493	ENSMUSG00000025630	Hprt	0.583386	2e-06	1.99e-05
Guttman_lincRNA_2551_._Ensembl_ENSMUSG00000078952	ENSMUSG00000024725	Ostf1	0.583386	2e-06	1.99e-05
Guttman_lincRNA_2551_._Ensembl_ENSMUSG00000078952	ENSMUSG00000032366	Tpm1	-0.582979	2e-06	1.99e-05
Guttman_lincRNA_1447	ENSMUSG00000027239	Mdk	-0.582751	2e-06	1.99e-05
Guttman_lincRNA_1716_._Ensembl_ENSMUSG00000074303	ENSMUSG00000032495	Lrrc2	0.582704	2e-06	1.99e-05
Guttman_lincRNA_2485	ENSMUSG00000022218	Tgm1	0.582629	2e-06	1.99e-05
Guttman_lincRNA_2280_._Necsulea_CUFF.231493	ENSMUSG00000022218	Tgm1	0.582616	2e-06	1.99e-05
Guttman_lincRNA_2551_._Ensembl_ENSMUSG00000078952	ENSMUSG00000052776	Oas1a	0.582608	2e-06	1.99e-05
Ensembl_ENSMUSG00000000031_._Ensembl_ENSMUSG00000099143_._Ensembl_ENSMUSG00000098816	ENSMUSG00000020160	Meis1	0.582512	2e-06	1.99e-05
Guttman_lincRNA_1716_._Ensembl_ENSMUSG00000074303	ENSMUSG00000058186	Gm13242	0.582481	2e-06	1.99e-05
Ensembl_ENSMUSG00000000031_._Ensembl_ENSMUSG00000099143_._Ensembl_ENSMUSG00000098816	ENSMUSG00000036036	Zfp57	-0.582475	2e-06	1.99e-05
Guttman_lincRNA_1447	ENSMUSG00000078182	Gm6083	0.582469	2e-06	1.99e-05
Guttman_lincRNA_2485	ENSMUSG00000037860	Aim2	0.582452	2e-06	1.99e-05
Necsulea_Locus_99471_._Guttman_lincRNA_674_._Ensembl_ENSMUSG00000097639	ENSMUSG00000016319	Slc25a5	0.582427	2e-06	1.99e-05
Guttman_lincRNA_2551_._Ensembl_ENSMUSG00000078952	ENSMUSG00000029922	Mkrn1	0.582235	2e-06	1.99e-05
Guttman_lincRNA_1716_._Ensembl_ENSMUSG00000074303	ENSMUSG00000032279	Idh3a	0.582133	2e-06	1.99e-05
Necsulea_Locus_99471_._Guttman_lincRNA_674_._Ensembl_ENSMUSG00000097639	ENSMUSG00000078496	Gm13152	0.58207	2e-06	1.99e-05
Guttman_lincRNA_2551_._Ensembl_ENSMUSG00000078952	ENSMUSG00000052102	Gnpda1	0.581895	2e-06	1.99e-05
Guttman_lincRNA_1716_._Ensembl_ENSMUSG00000074303	ENSMUSG00000005148	Klf5	0.581803	2e-06	1.99e-05
Guttman_lincRNA_2551_._Ensembl_ENSMUSG00000078952	ENSMUSG00000020899	Pfas	0.581568	2e-06	1.99e-05
Guttman_lincRNA_2485	ENSMUSG00000074887	EU599041	0.581493	2e-06	1.99e-05
Guttman_lincRNA_2280_._Necsulea_CUFF.231493	ENSMUSG00000054766	Set	0.581471	2e-06	1.99e-05
Ensembl_ENSMUSG00000000031_._Ensembl_ENSMUSG00000099143_._Ensembl_ENSMUSG00000098816	ENSMUSG00000030342	Cd9	-0.581104	2e-06	1.99e-05
Guttman_lincRNA_2551_._Ensembl_ENSMUSG00000078952	ENSMUSG00000028173	Wls	-0.581044	2e-06	1.99e-05
Ensembl_ENSMUSG00000000031_._Ensembl_ENSMUSG00000099143_._Ensembl_ENSMUSG00000098816	ENSMUSG00000030619	Eed	-0.580869	2e-06	1.99e-05
Guttman_lincRNA_542_._Ensembl_ENSMUSG00000084762_._Necsulea_ENSMUSG00000084762	ENSMUSG00000028691	Prdx1	0.580568	2e-06	1.99e-05
Guttman_lincRNA_516_._Ensembl_ENSMUSG00000086454_._Necsulea_ENSMUSG00000086454	ENSMUSG00000028773	Fabp3	0.580528	2e-06	1.99e-05
Necsulea_Locus_99471_._Guttman_lincRNA_674_._Ensembl_ENSMUSG00000097639	ENSMUSG00000032397	Tipin	0.580469	2e-06	1.99e-05
Guttman_lincRNA_2551_._Ensembl_ENSMUSG00000078952	ENSMUSG00000022272	Myo10	0.580262	2e-06	1.99e-05
Guttman_lincRNA_1716_._Ensembl_ENSMUSG00000074303	ENSMUSG00000081037	Gm13929	0.580137	2e-06	1.99e-05
Guttman_lincRNA_2551_._Ensembl_ENSMUSG00000078952	ENSMUSG00000043629	1700019D03Rik	0.580123	2e-06	1.99e-05
Guttman_lincRNA_2280_._Necsulea_CUFF.231493	ENSMUSG00000039145	Camk1d	0.579783	2e-06	1.99e-05
Guttman_lincRNA_2551_._Ensembl_ENSMUSG00000078952	ENSMUSG00000026193	Fn1	0.579746	2e-06	1.99e-05
Guttman_lincRNA_1447	ENSMUSG00000079225	Gm9531	0.579733	2e-06	1.99e-05
Guttman_lincRNA_1447	ENSMUSG00000005370	Msh6	0.579583	2e-06	1.99e-05
Guttman_lincRNA_516_._Ensembl_ENSMUSG00000086454_._Necsulea_ENSMUSG00000086454	Ensembl_ENSMUSG00000092349		0.579521	2e-06	1.99e-05
Necsulea_Locus_22428_._Guttman_lincRNA_2851_._Necsulea_Locus_21016	ENSMUSG00000067919	Rex2	0.57932	2e-06	1.99e-05
Guttman_lincRNA_542_._Ensembl_ENSMUSG00000084762_._Necsulea_ENSMUSG00000084762	ENSMUSG00000027077	Smtnl1	0.579318	2e-06	1.99e-05
Guttman_lincRNA_516_._Ensembl_ENSMUSG00000086454_._Necsulea_ENSMUSG00000086454	ENSMUSG00000081766	2210409E12Rik	0.579223	2e-06	1.99e-05
Guttman_lincRNA_2280_._Necsulea_CUFF.231493	Necsulea_Locus_99471_._Guttman_lincRNA_674_._Ensembl_ENSMUSG00000097639		0.578986	2e-06	1.99e-05
Ensembl_ENSMUSG00000000031_._Ensembl_ENSMUSG00000099143_._Ensembl_ENSMUSG00000098816	ENSMUSG00000039682	Lap3	-0.578974	2e-06	1.99e-05
Guttman_lincRNA_2485	ENSMUSG00000030793	Pycard	0.578629	2e-06	1.99e-05
Guttman_lincRNA_1447	ENSMUSG00000066007	Zfp600	0.578519	2e-06	1.99e-05
Guttman_lincRNA_2454	ENSMUSG00000064194	Zfp936	0.578517	2e-06	1.99e-05
Guttman_lincRNA_2551_._Ensembl_ENSMUSG00000078952	ENSMUSG00000040785	Ttc3	-0.578229	2e-06	1.99e-05
Ensembl_ENSMUSG00000000031_._Ensembl_ENSMUSG00000099143_._Ensembl_ENSMUSG00000098816	ENSMUSG00000031575	Ash2l	-0.578088	2e-06	1.99e-05
Guttman_lincRNA_516_._Ensembl_ENSMUSG00000086454_._Necsulea_ENSMUSG00000086454	Necsulea_Locus_99471_._Guttman_lincRNA_674_._Ensembl_ENSMUSG00000097639		0.577997	2e-06	1.99e-05
Guttman_lincRNA_1716_._Ensembl_ENSMUSG00000074303	ENSMUSG00000001228	Uhrf1	0.577988	2e-06	1.99e-05
Guttman_lincRNA_2551_._Ensembl_ENSMUSG00000078952	ENSMUSG00000038700	Hoxb5	-0.577821	2e-06	1.99e-05
Guttman_lincRNA_1447	ENSMUSG00000028691	Prdx1	0.577746	2e-06	1.99e-05
Guttman_lincRNA_2280_._Necsulea_CUFF.231493	ENSMUSG00000040785	Ttc3	-0.57771	2e-06	1.99e-05
Guttman_lincRNA_2485	ENSMUSG00000040564	Apoc1	0.577657	2e-06	1.99e-05
Ensembl_ENSMUSG00000000031_._Ensembl_ENSMUSG00000099143_._Ensembl_ENSMUSG00000098816	ENSMUSG00000032346	Ooep	-0.577532	2e-06	1.99e-05
Necsulea_Locus_99471_._Guttman_lincRNA_674_._Ensembl_ENSMUSG00000097639	ENSMUSG00000074887	EU599041	0.577484	2e-06	1.99e-05
Guttman_lincRNA_1447	ENSMUSG00000000486	2001-09-01	0.577352	2e-06	1.99e-05
Guttman_lincRNA_1447	ENSMUSG00000092225	Gm2381	0.577105	2e-06	1.99e-05
Necsulea_Locus_99471_._Guttman_lincRNA_674_._Ensembl_ENSMUSG00000097639	ENSMUSG00000038045	Sult6b1	0.577093	2e-06	1.99e-05
Guttman_lincRNA_542_._Ensembl_ENSMUSG00000084762_._Necsulea_ENSMUSG00000084762	ENSMUSG00000064194	Zfp936	0.577024	2e-06	1.99e-05
Guttman_lincRNA_2454	ENSMUSG00000037935	Smarce1	-0.576966	2e-06	1.99e-05
Necsulea_Locus_99471_._Guttman_lincRNA_674_._Ensembl_ENSMUSG00000097639	ENSMUSG00000025630	Hprt	0.576681	2e-06	1.99e-05
Guttman_lincRNA_2485	ENSMUSG00000064194	Zfp936	0.576611	2e-06	1.99e-05
Guttman_lincRNA_2280_._Necsulea_CUFF.231493	ENSMUSG00000025503	Taldo1	0.576593	2e-06	1.99e-05
Guttman_lincRNA_1716_._Ensembl_ENSMUSG00000074303	ENSMUSG00000024725	Ostf1	0.576517	2e-06	1.99e-05
Ensembl_ENSMUSG00000000031_._Ensembl_ENSMUSG00000099143_._Ensembl_ENSMUSG00000098816	ENSMUSG00000017491	Rarb	0.576443	2e-06	1.99e-05
Necsulea_Locus_99471_._Guttman_lincRNA_674_._Ensembl_ENSMUSG00000097639	ENSMUSG00000072419	Dppa2	0.576437	2e-06	1.99e-05
Guttman_lincRNA_1716_._Ensembl_ENSMUSG00000074303	ENSMUSG00000022419	Deptor	0.576424	2e-06	1.99e-05
Guttman_lincRNA_516_._Ensembl_ENSMUSG00000086454_._Necsulea_ENSMUSG00000086454	ENSMUSG00000035235	Trim13	0.576422	2e-06	1.99e-05
Guttman_lincRNA_542_._Ensembl_ENSMUSG00000084762_._Necsulea_ENSMUSG00000084762	ENSMUSG00000022304	Dpys	0.576357	2e-06	1.99e-05
Ensembl_ENSMUSG00000000031_._Ensembl_ENSMUSG00000099143_._Ensembl_ENSMUSG00000098816	ENSMUSG00000029007	Agtrap	-0.576331	2e-06	1.99e-05
Guttman_lincRNA_2551_._Ensembl_ENSMUSG00000078952	ENSMUSG00000002847	Pla1a	0.576312	2e-06	1.99e-05
Ensembl_ENSMUSG00000000031_._Ensembl_ENSMUSG00000099143_._Ensembl_ENSMUSG00000098816	ENSMUSG00000002076	Hsf2bp	-0.576091	2e-06	1.99e-05
Ensembl_ENSMUSG00000000031_._Ensembl_ENSMUSG00000099143_._Ensembl_ENSMUSG00000098816	ENSMUSG00000082082	Gm13230	-0.575922	2e-06	1.99e-05
Guttman_lincRNA_2551_._Ensembl_ENSMUSG00000078952	ENSMUSG00000037860	Aim2	0.575744	2e-06	1.99e-05
Guttman_lincRNA_2454	ENSMUSG00000024359	Hspa9	0.575047	2e-06	1.99e-05
Guttman_lincRNA_1716_._Ensembl_ENSMUSG00000074303	ENSMUSG00000030722	Nfatc2ip	0.574995	2e-06	1.99e-05
Guttman_lincRNA_1716_._Ensembl_ENSMUSG00000074303	ENSMUSG00000004187	Kifc2	0.574988	2e-06	1.99e-05
Guttman_lincRNA_2551_._Ensembl_ENSMUSG00000078952	ENSMUSG00000022040	Ephx2	0.574895	2e-06	1.99e-05
Guttman_lincRNA_1716_._Ensembl_ENSMUSG00000074303	ENSMUSG00000038515	Grtp1	0.574866	2e-06	1.99e-05
Guttman_lincRNA_2485	ENSMUSG00000042751	Nmnat2	0.574811	2e-06	1.99e-05
Guttman_lincRNA_2454	ENSMUSG00000025503	Taldo1	0.574772	2e-06	1.99e-05
Guttman_lincRNA_2485	ENSMUSG00000016319	Slc25a5	0.574639	2e-06	1.99e-05
Guttman_lincRNA_2280_._Necsulea_CUFF.231493	ENSMUSG00000047139	Cd24a	-0.5746	2e-06	1.99e-05
Guttman_lincRNA_1716_._Ensembl_ENSMUSG00000074303	ENSMUSG00000087207	Gm13147	0.574479	2e-06	1.99e-05
Guttman_lincRNA_516_._Ensembl_ENSMUSG00000086454_._Necsulea_ENSMUSG00000086454	ENSMUSG00000028640	Tfap2c	0.57447	2e-06	1.99e-05
Guttman_lincRNA_2551_._Ensembl_ENSMUSG00000078952	ENSMUSG00000061062	Gm10093	0.574251	2e-06	1.99e-05
Guttman_lincRNA_516_._Ensembl_ENSMUSG00000086454_._Necsulea_ENSMUSG00000086454	ENSMUSG00000027702	Lrrc34	0.574235	2e-06	1.99e-05
Guttman_lincRNA_2551_._Ensembl_ENSMUSG00000078952	ENSMUSG00000029267	Mtf2	0.574167	2e-06	1.99e-05
Guttman_lincRNA_2280_._Necsulea_CUFF.231493	ENSMUSG00000064194	Zfp936	0.574032	2e-06	1.99e-05
Guttman_lincRNA_2551_._Ensembl_ENSMUSG00000078952	ENSMUSG00000052180	Serpinb6c	0.574023	2e-06	1.99e-05
Guttman_lincRNA_2551_._Ensembl_ENSMUSG00000078952	ENSMUSG00000092335	Gm7221	0.574011	2e-06	1.99e-05
Ensembl_ENSMUSG00000000031_._Ensembl_ENSMUSG00000099143_._Ensembl_ENSMUSG00000098816	ENSMUSG00000078498	Gm13151	-0.574008	2e-06	1.99e-05
Guttman_lincRNA_1716_._Ensembl_ENSMUSG00000074303	ENSMUSG00000049422	Chchd10	0.574002	2e-06	1.99e-05
Necsulea_Locus_99471_._Guttman_lincRNA_674_._Ensembl_ENSMUSG00000097639	ENSMUSG00000078495	Gm13157	0.573653	2e-06	1.99e-05
Guttman_lincRNA_2280_._Necsulea_CUFF.231493	ENSMUSG00000020424	Gatsl3	0.57349	2e-06	1.99e-05
Guttman_lincRNA_2551_._Ensembl_ENSMUSG00000078952	ENSMUSG00000003032	Klf4	0.573271	2e-06	1.99e-05
Guttman_lincRNA_516_._Ensembl_ENSMUSG00000086454_._Necsulea_ENSMUSG00000086454	ENSMUSG00000038692	Hoxb4	-0.573237	2e-06	1.99e-05
Necsulea_Locus_99471_._Guttman_lincRNA_674_._Ensembl_ENSMUSG00000097639	ENSMUSG00000059552	Trp53	0.572984	2e-06	1.99e-05
Guttman_lincRNA_2485	ENSMUSG00000079471	Gm7325	0.572967	2e-06	1.99e-05
Guttman_lincRNA_1447	ENSMUSG00000073403	Gm10499	0.572906	2e-06	1.99e-05
Guttman_lincRNA_1447	ENSMUSG00000078495	Gm13157	0.57281	2e-06	1.99e-05
Guttman_lincRNA_516_._Ensembl_ENSMUSG00000086454_._Necsulea_ENSMUSG00000086454	ENSMUSG00000051747	Ttn	0.572706	2e-06	1.99e-05
Guttman_lincRNA_2485	ENSMUSG00000036202	Rif1	0.572623	2e-06	1.99e-05
Ensembl_ENSMUSG00000000031_._Ensembl_ENSMUSG00000099143_._Ensembl_ENSMUSG00000098816	ENSMUSG00000013236	Ptprs	0.57262	2e-06	1.99e-05
Guttman_lincRNA_1716_._Ensembl_ENSMUSG00000074303	ENSMUSG00000092225	Gm2381	0.572508	2e-06	1.99e-05
Guttman_lincRNA_516_._Ensembl_ENSMUSG00000086454_._Necsulea_ENSMUSG00000086454	ENSMUSG00000026600	Soat1	-0.57248	2e-06	1.99e-05
Ensembl_ENSMUSG00000000031_._Ensembl_ENSMUSG00000099143_._Ensembl_ENSMUSG00000098816	ENSMUSG00000019970	Sgk1	-0.572423	2e-06	1.99e-05
Guttman_lincRNA_2454	ENSMUSG00000023393	Slc17a9	0.572353	2e-06	1.99e-05
Guttman_lincRNA_2551_._Ensembl_ENSMUSG00000078952	ENSMUSG00000025503	Taldo1	0.572225	2e-06	1.99e-05
Guttman_lincRNA_516_._Ensembl_ENSMUSG00000086454_._Necsulea_ENSMUSG00000086454	ENSMUSG00000031490	Eif4ebp1	0.572191	2e-06	1.99e-05
Guttman_lincRNA_1716_._Ensembl_ENSMUSG00000074303	ENSMUSG00000066007	Zfp600	0.572098	2e-06	1.99e-05
Guttman_lincRNA_2280_._Necsulea_CUFF.231493	ENSMUSG00000038692	Hoxb4	-0.57208	2e-06	1.99e-05
Guttman_lincRNA_1447	ENSMUSG00000026288	Inpp5d	0.572048	2e-06	1.99e-05
Guttman_lincRNA_2551_._Ensembl_ENSMUSG00000078952	ENSMUSG00000018411	Mapt	0.571729	2e-06	1.99e-05
Guttman_lincRNA_516_._Ensembl_ENSMUSG00000086454_._Necsulea_ENSMUSG00000086454	ENSMUSG00000032397	Tipin	0.571613	2e-06	1.99e-05
Guttman_lincRNA_516_._Ensembl_ENSMUSG00000086454_._Necsulea_ENSMUSG00000086454	ENSMUSG00000021767	Kat6b	0.571391	2e-06	1.99e-05
Necsulea_Locus_99471_._Guttman_lincRNA_674_._Ensembl_ENSMUSG00000097639	ENSMUSG00000031490	Eif4ebp1	0.57138	2e-06	1.99e-05
Necsulea_Locus_99471_._Guttman_lincRNA_674_._Ensembl_ENSMUSG00000097639	ENSMUSG00000044626	Liph	0.571321	2e-06	1.99e-05
Guttman_lincRNA_2280_._Necsulea_CUFF.231493	ENSMUSG00000024359	Hspa9	0.571062	2e-06	1.99e-05
Guttman_lincRNA_516_._Ensembl_ENSMUSG00000086454_._Necsulea_ENSMUSG00000086454	ENSMUSG00000022304	Dpys	0.571005	2e-06	1.99e-05
Guttman_lincRNA_2280_._Necsulea_CUFF.231493	ENSMUSG00000063171	Rps4y2	0.570906	2e-06	1.99e-05
Guttman_lincRNA_1716_._Ensembl_ENSMUSG00000074303	ENSMUSG00000038692	Hoxb4	-0.570876	2e-06	1.99e-05
Guttman_lincRNA_2280_._Necsulea_CUFF.231493	ENSMUSG00000028358	Zfp618	-0.570864	2e-06	1.99e-05
Guttman_lincRNA_516_._Ensembl_ENSMUSG00000086454_._Necsulea_ENSMUSG00000086454	ENSMUSG00000044626	Liph	0.570798	2e-06	1.99e-05
Ensembl_ENSMUSG00000000031_._Ensembl_ENSMUSG00000099143_._Ensembl_ENSMUSG00000098816	ENSMUSG00000032495	Lrrc2	-0.570784	2e-06	1.99e-05
Guttman_lincRNA_516_._Ensembl_ENSMUSG00000086454_._Necsulea_ENSMUSG00000086454	ENSMUSG00000025255	Zfhx4	-0.570384	2e-06	1.99e-05
Guttman_lincRNA_516_._Ensembl_ENSMUSG00000086454_._Necsulea_ENSMUSG00000086454	ENSMUSG00000066652	Lefty2	0.570259	2e-06	1.99e-05
Guttman_lincRNA_2551_._Ensembl_ENSMUSG00000078952	ENSMUSG00000057561	Eif1a	0.570075	2e-06	1.99e-05
Guttman_lincRNA_2280_._Necsulea_CUFF.231493	ENSMUSG00000028691	Prdx1	0.570022	2e-06	1.99e-05
Guttman_lincRNA_542_._Ensembl_ENSMUSG00000084762_._Necsulea_ENSMUSG00000084762	ENSMUSG00000061062	Gm10093	0.569734	2e-06	1.99e-05
Guttman_lincRNA_2454	Guttman_lincRNA_1394_._Necsulea_Locus_93819_._Necsulea_Locus_92889_._Guttman_lincRNA_1395_._Necsulea_Locus_92697		0.569719	2e-06	1.99e-05
Ensembl_ENSMUSG00000000031_._Ensembl_ENSMUSG00000099143_._Ensembl_ENSMUSG00000098816	ENSMUSG00000055653	Gpc3	0.569427	2e-06	1.99e-05
Guttman_lincRNA_2485	ENSMUSG00000038045	Sult6b1	0.569273	2e-06	1.99e-05
Guttman_lincRNA_1447	ENSMUSG00000030793	Pycard	0.569171	2e-06	1.99e-05
Guttman_lincRNA_542_._Ensembl_ENSMUSG00000084762_._Necsulea_ENSMUSG00000084762	ENSMUSG00000001604	Tcea3	0.568984	2e-06	1.99e-05
Guttman_lincRNA_516_._Ensembl_ENSMUSG00000086454_._Necsulea_ENSMUSG00000086454	ENSMUSG00000046000	Naa11	0.568883	2e-06	1.99e-05
Guttman_lincRNA_516_._Ensembl_ENSMUSG00000086454_._Necsulea_ENSMUSG00000086454	ENSMUSG00000052180	Serpinb6c	0.568876	2e-06	1.99e-05
Ensembl_ENSMUSG00000000031_._Ensembl_ENSMUSG00000099143_._Ensembl_ENSMUSG00000098816	ENSMUSG00000002265	Peg3	0.568852	2e-06	1.99e-05
Guttman_lincRNA_516_._Ensembl_ENSMUSG00000086454_._Necsulea_ENSMUSG00000086454	ENSMUSG00000025764	Phf17	0.5688	2e-06	1.99e-05
Guttman_lincRNA_516_._Ensembl_ENSMUSG00000086454_._Necsulea_ENSMUSG00000086454	ENSMUSG00000020717	Pecam1	0.568698	2e-06	1.99e-05
Guttman_lincRNA_516_._Ensembl_ENSMUSG00000086454_._Necsulea_ENSMUSG00000086454	ENSMUSG00000028581	Laptm5	0.568662	2e-06	1.99e-05
Guttman_lincRNA_516_._Ensembl_ENSMUSG00000086454_._Necsulea_ENSMUSG00000086454	ENSMUSG00000058571	Gpc6	-0.568518	2e-06	1.99e-05
Ensembl_ENSMUSG00000000031_._Ensembl_ENSMUSG00000099143_._Ensembl_ENSMUSG00000098816	ENSMUSG00000076275	Mir675	0.568306	2e-06	1.99e-05
Ensembl_ENSMUSG00000000031_._Ensembl_ENSMUSG00000099143_._Ensembl_ENSMUSG00000098816	ENSMUSG00000038172	Ttc39b	-0.568246	2e-06	1.99e-05
Ensembl_ENSMUSG00000000031_._Ensembl_ENSMUSG00000099143_._Ensembl_ENSMUSG00000098816	ENSMUSG00000042367	Gjb3	-0.568186	2e-06	1.99e-05
Guttman_lincRNA_1716_._Ensembl_ENSMUSG00000074303	ENSMUSG00000078496	Gm13152	0.568053	2e-06	1.99e-05
Ensembl_ENSMUSG00000000031_._Ensembl_ENSMUSG00000099143_._Ensembl_ENSMUSG00000098816	ENSMUSG00000030551	Nr2f2	0.568033	2e-06	1.99e-05
Guttman_lincRNA_1447	ENSMUSG00000058186	Gm13242	0.567972	2e-06	1.99e-05
Guttman_lincRNA_542_._Ensembl_ENSMUSG00000084762_._Necsulea_ENSMUSG00000084762	ENSMUSG00000033826	Dnah8	0.567923	2e-06	1.99e-05
Guttman_lincRNA_542_._Ensembl_ENSMUSG00000084762_._Necsulea_ENSMUSG00000084762	ENSMUSG00000038692	Hoxb4	-0.567753	2e-06	1.99e-05
Guttman_lincRNA_516_._Ensembl_ENSMUSG00000086454_._Necsulea_ENSMUSG00000086454	ENSMUSG00000024180	Tmem8	0.567639	2e-06	1.99e-05
Ensembl_ENSMUSG00000000031_._Ensembl_ENSMUSG00000099143_._Ensembl_ENSMUSG00000098816	ENSMUSG00000032387	Rbpms2	-0.567532	2e-06	1.99e-05
Ensembl_ENSMUSG00000000031_._Ensembl_ENSMUSG00000099143_._Ensembl_ENSMUSG00000098816	ENSMUSG00000046402	Rbp1	0.567505	2e-06	1.99e-05
Guttman_lincRNA_516_._Ensembl_ENSMUSG00000086454_._Necsulea_ENSMUSG00000086454	ENSMUSG00000017453	Pipox	0.567424	2e-06	1.99e-05
Necsulea_Locus_99471_._Guttman_lincRNA_674_._Ensembl_ENSMUSG00000097639	ENSMUSG00000064194	Zfp936	0.567413	2e-06	1.99e-05
Guttman_lincRNA_516_._Ensembl_ENSMUSG00000086454_._Necsulea_ENSMUSG00000086454	ENSMUSG00000046402	Rbp1	-0.567138	2e-06	1.99e-05
Guttman_lincRNA_2551_._Ensembl_ENSMUSG00000078952	ENSMUSG00000020717	Pecam1	0.567137	2e-06	1.99e-05
Guttman_lincRNA_516_._Ensembl_ENSMUSG00000086454_._Necsulea_ENSMUSG00000086454	ENSMUSG00000055653	Gpc3	-0.56713	2e-06	1.99e-05
Necsulea_Locus_22428_._Guttman_lincRNA_2851_._Necsulea_Locus_21016	ENSMUSG00000028691	Prdx1	0.567105	2e-06	1.99e-05
Guttman_lincRNA_1447	ENSMUSG00000078497	Gm13145	0.567086	2e-06	1.99e-05
Guttman_lincRNA_2280_._Necsulea_CUFF.231493	ENSMUSG00000031584	Gsr	0.567084	2e-06	1.99e-05
Guttman_lincRNA_1716_._Ensembl_ENSMUSG00000074303	ENSMUSG00000078497	Gm13145	0.567069	2e-06	1.99e-05
Ensembl_ENSMUSG00000000031_._Ensembl_ENSMUSG00000099143_._Ensembl_ENSMUSG00000098816	ENSMUSG00000000365	Rnf17	-0.567059	2e-06	1.99e-05
Guttman_lincRNA_1716_._Ensembl_ENSMUSG00000074303	ENSMUSG00000028581	Laptm5	0.56668	2e-06	1.99e-05
Guttman_lincRNA_2280_._Necsulea_CUFF.231493	ENSMUSG00000024039	Cbs	0.566626	2e-06	1.99e-05
Ensembl_ENSMUSG00000000031_._Ensembl_ENSMUSG00000099143_._Ensembl_ENSMUSG00000098816	ENSMUSG00000070708	Gtsf1l	-0.566496	2e-06	1.99e-05
Guttman_lincRNA_1716_._Ensembl_ENSMUSG00000074303	ENSMUSG00000021360	Gcnt2	0.566474	2e-06	1.99e-05
Guttman_lincRNA_516_._Ensembl_ENSMUSG00000086454_._Necsulea_ENSMUSG00000086454	ENSMUSG00000057561	Eif1a	0.566319	2e-06	1.99e-05
Guttman_lincRNA_2280_._Necsulea_CUFF.231493	ENSMUSG00000016319	Slc25a5	0.566308	2e-06	1.99e-05
Guttman_lincRNA_1716_._Ensembl_ENSMUSG00000074303	ENSMUSG00000033837	Foxh1	0.566236	2e-06	1.99e-05
Guttman_lincRNA_2551_._Ensembl_ENSMUSG00000078952	ENSMUSG00000019947	Arid5b	0.566133	2e-06	1.99e-05
Ensembl_ENSMUSG00000000031_._Ensembl_ENSMUSG00000099143_._Ensembl_ENSMUSG00000098816	ENSMUSG00000058186	Gm13242	-0.565929	2e-06	1.99e-05
Guttman_lincRNA_516_._Ensembl_ENSMUSG00000086454_._Necsulea_ENSMUSG00000086454	ENSMUSG00000019947	Arid5b	0.565786	2e-06	1.99e-05
Guttman_lincRNA_2280_._Necsulea_CUFF.231493	ENSMUSG00000028109	Hormad1	0.565773	2e-06	1.99e-05
Guttman_lincRNA_2454	ENSMUSG00000039145	Camk1d	0.56576	2e-06	1.99e-05
Guttman_lincRNA_2551_._Ensembl_ENSMUSG00000078952	ENSMUSG00000039682	Lap3	0.565719	2e-06	1.99e-05
Guttman_lincRNA_2551_._Ensembl_ENSMUSG00000078952	ENSMUSG00000028766	Alpl	0.565604	2e-06	1.99e-05
Ensembl_ENSMUSG00000000031_._Ensembl_ENSMUSG00000099143_._Ensembl_ENSMUSG00000098816	ENSMUSG00000072244	Trim6	-0.565603	2e-06	1.99e-05
Ensembl_ENSMUSG00000000031_._Ensembl_ENSMUSG00000099143_._Ensembl_ENSMUSG00000098816	ENSMUSG00000046323	Dppa3	-0.565409	2e-06	1.99e-05
Guttman_lincRNA_2551_._Ensembl_ENSMUSG00000078952	ENSMUSG00000074867	Zfp808	0.565358	2e-06	1.99e-05
Ensembl_ENSMUSG00000092349	ENSMUSG00000036202	Rif1	0.565302	2e-06	1.99e-05
Guttman_lincRNA_1447	ENSMUSG00000030672	Mylpf	0.565269	2e-06	1.99e-05
Ensembl_ENSMUSG00000000031_._Ensembl_ENSMUSG00000099143_._Ensembl_ENSMUSG00000098816	ENSMUSG00000079225	Gm9531	-0.565178	2e-06	1.99e-05
Guttman_lincRNA_1716_._Ensembl_ENSMUSG00000074303	ENSMUSG00000028691	Prdx1	0.565069	2e-06	1.99e-05
Guttman_lincRNA_516_._Ensembl_ENSMUSG00000086454_._Necsulea_ENSMUSG00000086454	ENSMUSG00000022218	Tgm1	0.564961	2e-06	1.99e-05
Guttman_lincRNA_2454	ENSMUSG00000031651	Triml1	0.564903	2e-06	1.99e-05
Guttman_lincRNA_2454	ENSMUSG00000027452	Acss1	0.564885	2e-06	1.99e-05
Necsulea_Locus_22428_._Guttman_lincRNA_2851_._Necsulea_Locus_21016	ENSMUSG00000066007	Zfp600	0.564855	2e-06	1.99e-05
Ensembl_ENSMUSG00000000031_._Ensembl_ENSMUSG00000099143_._Ensembl_ENSMUSG00000098816	ENSMUSG00000056300	Gm13247	-0.564818	2e-06	1.99e-05
Guttman_lincRNA_1716_._Ensembl_ENSMUSG00000074303	ENSMUSG00000022682	Rrn3	0.564583	2e-06	1.99e-05
Guttman_lincRNA_1447	ENSMUSG00000013236	Ptprs	-0.564488	2e-06	1.99e-05
Ensembl_ENSMUSG00000000031_._Ensembl_ENSMUSG00000099143_._Ensembl_ENSMUSG00000098816	ENSMUSG00000022682	Rrn3	-0.564382	2e-06	1.99e-05
Guttman_lincRNA_2454	ENSMUSG00000016319	Slc25a5	0.564184	2e-06	1.99e-05
Ensembl_ENSMUSG00000000031_._Ensembl_ENSMUSG00000099143_._Ensembl_ENSMUSG00000098816	ENSMUSG00000030491	Tdrd12	-0.564037	2e-06	1.99e-05
Guttman_lincRNA_2551_._Ensembl_ENSMUSG00000078952	ENSMUSG00000027547	Sall4	0.564009	2e-06	1.99e-05
Guttman_lincRNA_1447	ENSMUSG00000025491	Ifitm1	0.563944	2e-06	1.99e-05
Guttman_lincRNA_2280_._Necsulea_CUFF.231493	ENSMUSG00000068245	Phf11d	0.56375	2e-06	1.99e-05
Guttman_lincRNA_516_._Ensembl_ENSMUSG00000086454_._Necsulea_ENSMUSG00000086454	ENSMUSG00000023942	Slc29a1	0.563663	2e-06	1.99e-05
Guttman_lincRNA_516_._Ensembl_ENSMUSG00000086454_._Necsulea_ENSMUSG00000086454	ENSMUSG00000061544	Zfp229	0.563535	2e-06	1.99e-05
Guttman_lincRNA_2280_._Necsulea_CUFF.231493	ENSMUSG00000079560	Hoxa3	-0.563487	2e-06	1.99e-05
Guttman_lincRNA_2551_._Ensembl_ENSMUSG00000078952	Guttman_lincRNA_2174		0.563486	2e-06	1.99e-05
Guttman_lincRNA_516_._Ensembl_ENSMUSG00000086454_._Necsulea_ENSMUSG00000086454	ENSMUSG00000043629	1700019D03Rik	0.563439	2e-06	1.99e-05
Guttman_lincRNA_1716_._Ensembl_ENSMUSG00000074303	ENSMUSG00000040564	Apoc1	0.563321	2e-06	1.99e-05
Guttman_lincRNA_1716_._Ensembl_ENSMUSG00000074303	ENSMUSG00000031490	Eif4ebp1	0.563093	2e-06	1.99e-05
Guttman_lincRNA_2551_._Ensembl_ENSMUSG00000078952	ENSMUSG00000039329	Tex19.1	0.562911	2e-06	1.99e-05
Ensembl_ENSMUSG00000000031_._Ensembl_ENSMUSG00000099143_._Ensembl_ENSMUSG00000098816	ENSMUSG00000078496	Gm13152	-0.562895	2e-06	1.99e-05
Ensembl_ENSMUSG00000000031_._Ensembl_ENSMUSG00000099143_._Ensembl_ENSMUSG00000098816	ENSMUSG00000066007	Zfp600	-0.562604	2e-06	1.99e-05
Guttman_lincRNA_1394_._Necsulea_Locus_93819_._Necsulea_Locus_92889_._Guttman_lincRNA_1395_._Necsulea_Locus_92697	ENSMUSG00000082896	Gm5844	0.562428	2e-06	1.99e-05
Ensembl_ENSMUSG00000000031_._Ensembl_ENSMUSG00000099143_._Ensembl_ENSMUSG00000098816	ENSMUSG00000030117	Gdf3	-0.56226	2e-06	1.99e-05
Necsulea_Locus_99471_._Guttman_lincRNA_674_._Ensembl_ENSMUSG00000097639	ENSMUSG00000013236	Ptprs	-0.562191	2e-06	1.99e-05
Guttman_lincRNA_2551_._Ensembl_ENSMUSG00000078952	ENSMUSG00000031403	Dkc1	0.562152	2e-06	1.99e-05
Guttman_lincRNA_2280_._Necsulea_CUFF.231493	ENSMUSG00000002847	Pla1a	0.562073	2e-06	1.99e-05
Guttman_lincRNA_1447	ENSMUSG00000031575	Ash2l	0.561698	2e-06	1.99e-05
Ensembl_ENSMUSG00000000031_._Ensembl_ENSMUSG00000099143_._Ensembl_ENSMUSG00000098816	ENSMUSG00000006818	Sod2	-0.561666	2e-06	1.99e-05
Ensembl_ENSMUSG00000000031_._Ensembl_ENSMUSG00000099143_._Ensembl_ENSMUSG00000098816	ENSMUSG00000066000	2610305D13Rik	-0.561491	2e-06	1.99e-05
Guttman_lincRNA_516_._Ensembl_ENSMUSG00000086454_._Necsulea_ENSMUSG00000086454	ENSMUSG00000092035	Peg10	-0.561475	2e-06	1.99e-05
Guttman_lincRNA_1447	ENSMUSG00000049422	Chchd10	0.561426	2e-06	1.99e-05
Necsulea_Locus_22428_._Guttman_lincRNA_2851_._Necsulea_Locus_21016	ENSMUSG00000095661	Gm8935	0.561393	2e-06	1.99e-05
Guttman_lincRNA_1447	ENSMUSG00000038587	Akap12	0.561349	2e-06	1.99e-05
Guttman_lincRNA_2551_._Ensembl_ENSMUSG00000078952	ENSMUSG00000032309	Fbxo22	0.561348	2e-06	1.99e-05
Ensembl_ENSMUSG00000000031_._Ensembl_ENSMUSG00000099143_._Ensembl_ENSMUSG00000098816	ENSMUSG00000032348	Gsta4	-0.561291	2e-06	1.99e-05
Guttman_lincRNA_516_._Ensembl_ENSMUSG00000086454_._Necsulea_ENSMUSG00000086454	ENSMUSG00000058550	Dppa4	0.560983	2e-06	1.99e-05
Guttman_lincRNA_1716_._Ensembl_ENSMUSG00000074303	ENSMUSG00000079225	Gm9531	0.560872	2e-06	1.99e-05
Guttman_lincRNA_516_._Ensembl_ENSMUSG00000086454_._Necsulea_ENSMUSG00000086454	ENSMUSG00000003032	Klf4	0.56084	2e-06	1.99e-05
Guttman_lincRNA_2454	ENSMUSG00000036743	Psma8	0.560405	2e-06	1.99e-05
Guttman_lincRNA_542_._Ensembl_ENSMUSG00000084762_._Necsulea_ENSMUSG00000084762	ENSMUSG00000022682	Rrn3	0.560357	2e-06	1.99e-05
Necsulea_Locus_27300_._Guttman_lincRNA_3508	ENSMUSG00000082896	Gm5844	0.560193	2e-06	1.99e-05
Guttman_lincRNA_2551_._Ensembl_ENSMUSG00000078952	ENSMUSG00000034203	Chchd4	0.560055	2e-06	1.99e-05
Guttman_lincRNA_2551_._Ensembl_ENSMUSG00000078952	ENSMUSG00000095193	Gm20939	0.560053	2e-06	1.99e-05
Guttman_lincRNA_1447	ENSMUSG00000038253	Hoxa5	-0.560019	2e-06	1.99e-05
Guttman_lincRNA_2485	ENSMUSG00000013236	Ptprs	-0.559968	2e-06	1.99e-05
Guttman_lincRNA_2454	Ensembl_ENSMUSG00000092349		0.559885	2e-06	1.99e-05
Guttman_lincRNA_1716_._Ensembl_ENSMUSG00000074303	ENSMUSG00000067919	Rex2	0.55983	2e-06	1.99e-05
Guttman_lincRNA_516_._Ensembl_ENSMUSG00000086454_._Necsulea_ENSMUSG00000086454	ENSMUSG00000028807	Zbtb8a	0.559768	2e-06	1.99e-05
Guttman_lincRNA_2280_._Necsulea_CUFF.231493	ENSMUSG00000052102	Gnpda1	0.559678	2e-06	1.99e-05
Necsulea_Locus_22428_._Guttman_lincRNA_2851_._Necsulea_Locus_21016	ENSMUSG00000038692	Hoxb4	-0.559543	2e-06	1.99e-05
Guttman_lincRNA_2551_._Ensembl_ENSMUSG00000078952	ENSMUSG00000060572	Mfap2	-0.559527	2e-06	1.99e-05
Necsulea_Locus_99471_._Guttman_lincRNA_674_._Ensembl_ENSMUSG00000097639	Guttman_lincRNA_2454		0.559429	2e-06	1.99e-05
Ensembl_ENSMUSG00000092349	ENSMUSG00000038510	Rpf2	0.559372	2e-06	1.99e-05
Guttman_lincRNA_2485	ENSMUSG00000006818	Sod2	0.559338	2e-06	1.99e-05
Guttman_lincRNA_516_._Ensembl_ENSMUSG00000086454_._Necsulea_ENSMUSG00000086454	ENSMUSG00000039395	Mreg	0.559324	2e-06	1.99e-05
Necsulea_Locus_99471_._Guttman_lincRNA_674_._Ensembl_ENSMUSG00000097639	ENSMUSG00000037935	Smarce1	-0.55927	2e-06	1.99e-05
Guttman_lincRNA_2454	ENSMUSG00000033983	Coil	0.55926	2e-06	1.99e-05
Guttman_lincRNA_2280_._Necsulea_CUFF.231493	ENSMUSG00000027506	Tpd52	0.559105	2e-06	1.99e-05
Necsulea_Locus_99471_._Guttman_lincRNA_674_._Ensembl_ENSMUSG00000097639	ENSMUSG00000000486	2001-09-01	0.55908	2e-06	1.99e-05
Necsulea_Locus_22428_._Guttman_lincRNA_2851_._Necsulea_Locus_21016	ENSMUSG00000082896	Gm5844	0.558943	2e-06	1.99e-05
Guttman_lincRNA_2485	ENSMUSG00000052776	Oas1a	0.558936	2e-06	1.99e-05
Ensembl_ENSMUSG00000000031_._Ensembl_ENSMUSG00000099143_._Ensembl_ENSMUSG00000098816	ENSMUSG00000003849	Nqo1	-0.558886	2e-06	1.99e-05
Guttman_lincRNA_2454	ENSMUSG00000025357	Dgka	0.558882	2e-06	1.99e-05
Guttman_lincRNA_2280_._Necsulea_CUFF.231493	ENSMUSG00000032224	Fam81a	0.558726	2e-06	1.99e-05
Guttman_lincRNA_2551_._Ensembl_ENSMUSG00000078952	ENSMUSG00000024180	Tmem8	0.558456	2e-06	1.99e-05
Ensembl_ENSMUSG00000000031_._Ensembl_ENSMUSG00000099143_._Ensembl_ENSMUSG00000098816	ENSMUSG00000034391	Fbxo15	-0.558424	2e-06	1.99e-05
Ensembl_ENSMUSG00000000031_._Ensembl_ENSMUSG00000099143_._Ensembl_ENSMUSG00000098816	ENSMUSG00000030268	Bcat1	-0.558263	2e-06	1.99e-05
Guttman_lincRNA_2485	ENSMUSG00000031403	Dkc1	0.558186	2e-06	1.99e-05
Guttman_lincRNA_542_._Ensembl_ENSMUSG00000084762_._Necsulea_ENSMUSG00000084762	Ensembl_ENSMUSG00000092349		0.558134	2e-06	1.99e-05
Ensembl_ENSMUSG00000092349	Ensembl_ENSMUSG00000056579_._Guttman_lincRNA_2207_._Ensembl_ENSMUSG00000099081_._Ensembl_ENSMUSG00000098265_._Ensembl_ENSMUSG00000098503_._Ensembl_ENSMUSG00000098948		-0.557947	2e-06	1.99e-05
Guttman_lincRNA_516_._Ensembl_ENSMUSG00000086454_._Necsulea_ENSMUSG00000086454	ENSMUSG00000028435	Aqp3	0.557857	2e-06	1.99e-05
Guttman_lincRNA_2280_._Necsulea_CUFF.231493	ENSMUSG00000096696	Zfp960	0.557838	2e-06	1.99e-05
Ensembl_ENSMUSG00000000031_._Ensembl_ENSMUSG00000099143_._Ensembl_ENSMUSG00000098816	ENSMUSG00000007379	Dennd2c	-0.557679	2e-06	1.99e-05
Guttman_lincRNA_516_._Ensembl_ENSMUSG00000086454_._Necsulea_ENSMUSG00000086454	ENSMUSG00000022474	Pmm1	0.557606	2e-06	1.99e-05
Ensembl_ENSMUSG00000000031_._Ensembl_ENSMUSG00000099143_._Ensembl_ENSMUSG00000098816	ENSMUSG00000066009	Gm13051	-0.557561	2e-06	1.99e-05
Necsulea_Locus_99471_._Guttman_lincRNA_674_._Ensembl_ENSMUSG00000097639	ENSMUSG00000005148	Klf5	0.557534	2e-06	1.99e-05
Guttman_lincRNA_516_._Ensembl_ENSMUSG00000086454_._Necsulea_ENSMUSG00000086454	ENSMUSG00000022048	Dpysl2	-0.557487	2e-06	1.99e-05
Guttman_lincRNA_516_._Ensembl_ENSMUSG00000086454_._Necsulea_ENSMUSG00000086454	ENSMUSG00000013766	Ly6g6e	0.55734	2e-06	1.99e-05
Ensembl_ENSMUSG00000000031_._Ensembl_ENSMUSG00000099143_._Ensembl_ENSMUSG00000098816	ENSMUSG00000031762	Mt2	-0.55733	2e-06	1.99e-05
Guttman_lincRNA_1716_._Ensembl_ENSMUSG00000074303	ENSMUSG00000000486	2001-09-01	0.557317	2e-06	1.99e-05
Necsulea_Locus_22428_._Guttman_lincRNA_2851_._Necsulea_Locus_21016	ENSMUSG00000058186	Gm13242	0.557259	2e-06	1.99e-05
Guttman_lincRNA_1447	Guttman_lincRNA_542_._Ensembl_ENSMUSG00000084762_._Necsulea_ENSMUSG00000084762		0.557223	2e-06	1.99e-05
Guttman_lincRNA_1716_._Ensembl_ENSMUSG00000074303	ENSMUSG00000024180	Tmem8	0.557139	2e-06	1.99e-05
Guttman_lincRNA_2454	ENSMUSG00000033826	Dnah8	0.556859	2e-06	1.99e-05
Ensembl_ENSMUSG00000000031_._Ensembl_ENSMUSG00000099143_._Ensembl_ENSMUSG00000098816	ENSMUSG00000029752	Asns	-0.556826	2e-06	1.99e-05
Guttman_lincRNA_2551_._Ensembl_ENSMUSG00000078952	ENSMUSG00000022218	Tgm1	0.556806	2e-06	1.99e-05
Guttman_lincRNA_2485	ENSMUSG00000038692	Hoxb4	-0.556794	2e-06	1.99e-05
Guttman_lincRNA_2551_._Ensembl_ENSMUSG00000078952	ENSMUSG00000021196	Pfkp	0.5565	2e-06	1.99e-05
Ensembl_ENSMUSG00000000031_._Ensembl_ENSMUSG00000099143_._Ensembl_ENSMUSG00000098816	ENSMUSG00000055148	Klf2	-0.556334	2e-06	1.99e-05
Necsulea_Locus_22428_._Guttman_lincRNA_2851_._Necsulea_Locus_21016	ENSMUSG00000047751	Utf1	0.556233	2e-06	1.99e-05
Necsulea_Locus_99471_._Guttman_lincRNA_674_._Ensembl_ENSMUSG00000097639	ENSMUSG00000020899	Pfas	0.556081	2e-06	1.99e-05
Guttman_lincRNA_2454	ENSMUSG00000020899	Pfas	0.556012	2e-06	1.99e-05
Guttman_lincRNA_2485	ENSMUSG00000027077	Smtnl1	0.55597	2e-06	1.99e-05
Necsulea_Locus_99471_._Guttman_lincRNA_674_._Ensembl_ENSMUSG00000097639	ENSMUSG00000067860	Zic3	0.555909	2e-06	1.99e-05
Guttman_lincRNA_516_._Ensembl_ENSMUSG00000086454_._Necsulea_ENSMUSG00000086454	ENSMUSG00000006056	Calcoco2	0.555731	2e-06	1.99e-05
Guttman_lincRNA_2280_._Necsulea_CUFF.231493	ENSMUSG00000010342	Tex14	0.555726	2e-06	1.99e-05
Guttman_lincRNA_2280_._Necsulea_CUFF.231493	ENSMUSG00000021127	Zfp36l1	-0.555706	2e-06	1.99e-05
Guttman_lincRNA_516_._Ensembl_ENSMUSG00000086454_._Necsulea_ENSMUSG00000086454	ENSMUSG00000062929	Cfl2	-0.555612	2e-06	1.99e-05
Guttman_lincRNA_2454	ENSMUSG00000014245	Pigl	0.555598	2e-06	1.99e-05
Guttman_lincRNA_542_._Ensembl_ENSMUSG00000084762_._Necsulea_ENSMUSG00000084762	ENSMUSG00000074887	EU599041	0.55556	2e-06	1.99e-05
Guttman_lincRNA_2551_._Ensembl_ENSMUSG00000078952	ENSMUSG00000025287	Acot9	0.555549	2e-06	1.99e-05
Guttman_lincRNA_2551_._Ensembl_ENSMUSG00000078952	ENSMUSG00000031502	Col4a1	-0.555364	2e-06	1.99e-05
Guttman_lincRNA_542_._Ensembl_ENSMUSG00000084762_._Necsulea_ENSMUSG00000084762	ENSMUSG00000020899	Pfas	0.555264	2e-06	1.99e-05
Necsulea_Locus_22428_._Guttman_lincRNA_2851_._Necsulea_Locus_21016	ENSMUSG00000072419	Dppa2	0.555035	2e-06	1.99e-05
Guttman_lincRNA_2454	ENSMUSG00000031403	Dkc1	0.55491	2e-06	1.99e-05
Guttman_lincRNA_2485	ENSMUSG00000005148	Klf5	0.554792	2e-06	1.99e-05
Guttman_lincRNA_2280_._Necsulea_CUFF.231493	ENSMUSG00000032366	Tpm1	-0.55476	2e-06	1.99e-05
Guttman_lincRNA_1716_._Ensembl_ENSMUSG00000074303	ENSMUSG00000024039	Cbs	0.554743	2e-06	1.99e-05
Guttman_lincRNA_2280_._Necsulea_CUFF.231493	ENSMUSG00000037188	Grhl3	0.554739	2e-06	1.99e-05
Guttman_lincRNA_516_._Ensembl_ENSMUSG00000086454_._Necsulea_ENSMUSG00000086454	ENSMUSG00000059552	Trp53	0.554701	2e-06	1.99e-05
Ensembl_ENSMUSG00000056579_._Guttman_lincRNA_2207_._Ensembl_ENSMUSG00000099081_._Ensembl_ENSMUSG00000098265_._Ensembl_ENSMUSG00000098503_._Ensembl_ENSMUSG00000098948	ENSMUSG00000082896	Gm5844	-0.554691	2e-06	1.99e-05
Ensembl_ENSMUSG00000000031_._Ensembl_ENSMUSG00000099143_._Ensembl_ENSMUSG00000098816	ENSMUSG00000017861	Mybl2	-0.554464	2e-06	1.99e-05
Guttman_lincRNA_516_._Ensembl_ENSMUSG00000086454_._Necsulea_ENSMUSG00000086454	ENSMUSG00000023393	Slc17a9	0.554452	2e-06	1.99e-05
Ensembl_ENSMUSG00000000031_._Ensembl_ENSMUSG00000099143_._Ensembl_ENSMUSG00000098816	ENSMUSG00000054766	Set	-0.554428	2e-06	1.99e-05
Guttman_lincRNA_1716_._Ensembl_ENSMUSG00000074303	ENSMUSG00000047146	Tet1	0.554239	2e-06	1.99e-05
Guttman_lincRNA_516_._Ensembl_ENSMUSG00000086454_._Necsulea_ENSMUSG00000086454	ENSMUSG00000092335	Gm7221	0.554147	2e-06	1.99e-05
Guttman_lincRNA_1447	ENSMUSG00000078496	Gm13152	0.554078	2e-06	1.99e-05
Guttman_lincRNA_1716_._Ensembl_ENSMUSG00000074303	ENSMUSG00000032999	Nlrp4f	0.553946	2e-06	1.99e-05
Guttman_lincRNA_2280_._Necsulea_CUFF.231493	ENSMUSG00000020674	Pxdn	-0.553918	2e-06	1.99e-05
Ensembl_ENSMUSG00000000031_._Ensembl_ENSMUSG00000099143_._Ensembl_ENSMUSG00000098816	ENSMUSG00000003032	Klf4	-0.553881	2e-06	1.99e-05
Ensembl_ENSMUSG00000000031_._Ensembl_ENSMUSG00000099143_._Ensembl_ENSMUSG00000098816	Guttman_lincRNA_1716_._Ensembl_ENSMUSG00000074303		-0.553605	2e-06	1.99e-05
Guttman_lincRNA_542_._Ensembl_ENSMUSG00000084762_._Necsulea_ENSMUSG00000084762	ENSMUSG00000022710	Usp7	0.553577	2e-06	1.99e-05
Guttman_lincRNA_516_._Ensembl_ENSMUSG00000086454_._Necsulea_ENSMUSG00000086454	ENSMUSG00000026193	Fn1	0.553522	2e-06	1.99e-05
Guttman_lincRNA_2551_._Ensembl_ENSMUSG00000078952	ENSMUSG00000069171	Nr2f1	-0.553462	2e-06	1.99e-05
Ensembl_ENSMUSG00000000031_._Ensembl_ENSMUSG00000099143_._Ensembl_ENSMUSG00000098816	ENSMUSG00000028760	Eif4g3	0.553401	2e-06	1.99e-05
Guttman_lincRNA_2280_._Necsulea_CUFF.231493	ENSMUSG00000018727	Cpsf4l	0.553393	2e-06	1.99e-05
Guttman_lincRNA_2551_._Ensembl_ENSMUSG00000078952	ENSMUSG00000042357	Gjb5	0.553121	2e-06	1.99e-05
Guttman_lincRNA_2551_._Ensembl_ENSMUSG00000078952	ENSMUSG00000010342	Tex14	0.553083	2e-06	1.99e-05
Ensembl_ENSMUSG00000092349	ENSMUSG00000040488	Ltbp4	0.553006	2e-06	1.99e-05
Ensembl_ENSMUSG00000000031_._Ensembl_ENSMUSG00000099143_._Ensembl_ENSMUSG00000098816	ENSMUSG00000025630	Hprt	-0.552993	2e-06	1.99e-05
Guttman_lincRNA_2454	ENSMUSG00000092335	Gm7221	0.552785	2e-06	1.99e-05
Guttman_lincRNA_2454	ENSMUSG00000038692	Hoxb4	-0.552687	2e-06	1.99e-05
Guttman_lincRNA_516_._Ensembl_ENSMUSG00000086454_._Necsulea_ENSMUSG00000086454	ENSMUSG00000040726	Hesx1	0.552684	2e-06	1.99e-05
Guttman_lincRNA_1716_._Ensembl_ENSMUSG00000074303	Guttman_lincRNA_2454		0.552669	2e-06	1.99e-05
Guttman_lincRNA_2280_._Necsulea_CUFF.231493	Guttman_lincRNA_1394_._Necsulea_Locus_93819_._Necsulea_Locus_92889_._Guttman_lincRNA_1395_._Necsulea_Locus_92697		0.552668	2e-06	1.99e-05
Guttman_lincRNA_516_._Ensembl_ENSMUSG00000086454_._Necsulea_ENSMUSG00000086454	ENSMUSG00000028766	Alpl	0.552648	2e-06	1.99e-05
Guttman_lincRNA_2454	ENSMUSG00000001918	Slc1a5	0.552479	2e-06	1.99e-05
Guttman_lincRNA_2280_._Necsulea_CUFF.231493	ENSMUSG00000057561	Eif1a	0.552137	2e-06	1.99e-05
Guttman_lincRNA_1447	ENSMUSG00000042367	Gjb3	0.552085	2e-06	1.99e-05
Guttman_lincRNA_1716_._Ensembl_ENSMUSG00000074303	ENSMUSG00000022272	Myo10	0.552026	2e-06	1.99e-05
Guttman_lincRNA_2551_._Ensembl_ENSMUSG00000078952	ENSMUSG00000028109	Hormad1	0.551998	2e-06	1.99e-05
Guttman_lincRNA_2551_._Ensembl_ENSMUSG00000078952	ENSMUSG00000081766	2210409E12Rik	0.551965	2e-06	1.99e-05
Necsulea_Locus_22428_._Guttman_lincRNA_2851_._Necsulea_Locus_21016	ENSMUSG00000083899	Gm12346	0.551908	2e-06	1.99e-05
Guttman_lincRNA_2280_._Necsulea_CUFF.231493	ENSMUSG00000026600	Soat1	-0.551847	2e-06	1.99e-05
Guttman_lincRNA_2280_._Necsulea_CUFF.231493	ENSMUSG00000038526	Car14	-0.551657	2e-06	1.99e-05
Guttman_lincRNA_2280_._Necsulea_CUFF.231493	ENSMUSG00000023393	Slc17a9	0.551645	2e-06	1.99e-05
Guttman_lincRNA_2280_._Necsulea_CUFF.231493	ENSMUSG00000046000	Naa11	0.551637	2e-06	1.99e-05
Guttman_lincRNA_2551_._Ensembl_ENSMUSG00000078952	ENSMUSG00000061544	Zfp229	0.551625	2e-06	1.99e-05
Guttman_lincRNA_1447	ENSMUSG00000074637	Sox2	0.551623	2e-06	1.99e-05
Guttman_lincRNA_1716_._Ensembl_ENSMUSG00000074303	ENSMUSG00000048087	Gm4737	0.551616	2e-06	1.99e-05
Guttman_lincRNA_2551_._Ensembl_ENSMUSG00000078952	ENSMUSG00000030722	Nfatc2ip	0.551611	2e-06	1.99e-05
Guttman_lincRNA_516_._Ensembl_ENSMUSG00000086454_._Necsulea_ENSMUSG00000086454	ENSMUSG00000079560	Hoxa3	-0.551542	2e-06	1.99e-05
Guttman_lincRNA_542_._Ensembl_ENSMUSG00000084762_._Necsulea_ENSMUSG00000084762	ENSMUSG00000031651	Triml1	0.551533	2e-06	1.99e-05
Guttman_lincRNA_516_._Ensembl_ENSMUSG00000086454_._Necsulea_ENSMUSG00000086454	ENSMUSG00000029007	Agtrap	0.551383	2e-06	1.99e-05
Ensembl_ENSMUSG00000000031_._Ensembl_ENSMUSG00000099143_._Ensembl_ENSMUSG00000098816	ENSMUSG00000078497	Gm13145	-0.551375	2e-06	1.99e-05
Ensembl_ENSMUSG00000000031_._Ensembl_ENSMUSG00000099143_._Ensembl_ENSMUSG00000098816	ENSMUSG00000027239	Mdk	0.551366	2e-06	1.99e-05
Guttman_lincRNA_1716_._Ensembl_ENSMUSG00000074303	Guttman_lincRNA_2280_._Necsulea_CUFF.231493		0.551244	2e-06	1.99e-05
Guttman_lincRNA_2551_._Ensembl_ENSMUSG00000078952	ENSMUSG00000055560	Zfp459	0.55119	2e-06	1.99e-05
Guttman_lincRNA_516_._Ensembl_ENSMUSG00000086454_._Necsulea_ENSMUSG00000086454	ENSMUSG00000079471	Gm7325	0.551118	2e-06	1.99e-05
Guttman_lincRNA_516_._Ensembl_ENSMUSG00000086454_._Necsulea_ENSMUSG00000086454	ENSMUSG00000005566	Trim28	0.551088	2e-06	1.99e-05
Guttman_lincRNA_1716_._Ensembl_ENSMUSG00000074303	ENSMUSG00000023902	Zscan10	0.551012	2e-06	1.99e-05
Guttman_lincRNA_2454	ENSMUSG00000025364	Pa2g4	0.550922	2e-06	1.99e-05
Guttman_lincRNA_1447	ENSMUSG00000009585	Apobec3	0.550892	2e-06	1.99e-05
Guttman_lincRNA_1716_._Ensembl_ENSMUSG00000074303	ENSMUSG00000030536	Iqgap1	0.550869	2e-06	1.99e-05
Guttman_lincRNA_2551_._Ensembl_ENSMUSG00000078952	ENSMUSG00000033737	Fndc3c1	-0.550814	2e-06	1.99e-05
Ensembl_ENSMUSG00000000031_._Ensembl_ENSMUSG00000099143_._Ensembl_ENSMUSG00000098816	ENSMUSG00000021767	Kat6b	-0.550765	2e-06	1.99e-05
Guttman_lincRNA_542_._Ensembl_ENSMUSG00000084762_._Necsulea_ENSMUSG00000084762	ENSMUSG00000081766	2210409E12Rik	0.550636	2e-06	1.99e-05
Guttman_lincRNA_2454	ENSMUSG00000096696	Zfp960	0.550614	2e-06	1.99e-05
Necsulea_Locus_99471_._Guttman_lincRNA_674_._Ensembl_ENSMUSG00000097639	ENSMUSG00000054766	Set	0.550501	2e-06	1.99e-05
Guttman_lincRNA_2485	ENSMUSG00000020899	Pfas	0.550498	2e-06	1.99e-05
Ensembl_ENSMUSG00000000031_._Ensembl_ENSMUSG00000099143_._Ensembl_ENSMUSG00000098816	ENSMUSG00000027210	Meis2	0.550416	2e-06	1.99e-05
Ensembl_ENSMUSG00000000031_._Ensembl_ENSMUSG00000099143_._Ensembl_ENSMUSG00000098816	ENSMUSG00000022272	Myo10	-0.550262	2e-06	1.99e-05
Ensembl_ENSMUSG00000056579_._Guttman_lincRNA_2207_._Ensembl_ENSMUSG00000099081_._Ensembl_ENSMUSG00000098265_._Ensembl_ENSMUSG00000098503_._Ensembl_ENSMUSG00000098948	ENSMUSG00000054766	Set	-0.550149	2e-06	1.99e-05
Guttman_lincRNA_2551_._Ensembl_ENSMUSG00000078952	ENSMUSG00000028760	Eif4g3	-0.550115	2e-06	1.99e-05
Guttman_lincRNA_1716_._Ensembl_ENSMUSG00000074303	ENSMUSG00000063171	Rps4y2	0.550023	2e-06	1.99e-05
Ensembl_ENSMUSG00000000031_._Ensembl_ENSMUSG00000099143_._Ensembl_ENSMUSG00000098816	ENSMUSG00000030825	Hsd17b14	-0.550023	2e-06	1.99e-05
Guttman_lincRNA_2551_._Ensembl_ENSMUSG00000078952	Necsulea_Locus_22428_._Guttman_lincRNA_2851_._Necsulea_Locus_21016		0.550022	2e-06	1.99e-05
Necsulea_Locus_22428_._Guttman_lincRNA_2851_._Necsulea_Locus_21016	ENSMUSG00000016319	Slc25a5	0.549931	2e-06	1.99e-05
Ensembl_ENSMUSG00000056579_._Guttman_lincRNA_2207_._Ensembl_ENSMUSG00000099081_._Ensembl_ENSMUSG00000098265_._Ensembl_ENSMUSG00000098503_._Ensembl_ENSMUSG00000098948	ENSMUSG00000025364	Pa2g4	-0.549919	2e-06	1.99e-05
Guttman_lincRNA_1447	ENSMUSG00000055148	Klf2	0.549903	2e-06	1.99e-05
Guttman_lincRNA_2485	ENSMUSG00000025357	Dgka	0.549884	2e-06	1.99e-05
Guttman_lincRNA_2551_._Ensembl_ENSMUSG00000078952	ENSMUSG00000031584	Gsr	0.549882	2e-06	1.99e-05
Guttman_lincRNA_2280_._Necsulea_CUFF.231493	ENSMUSG00000061062	Gm10093	0.549845	2e-06	1.99e-05
Necsulea_Locus_99471_._Guttman_lincRNA_674_._Ensembl_ENSMUSG00000097639	ENSMUSG00000041718	Alg13	0.549834	2e-06	1.99e-05
Guttman_lincRNA_1447	ENSMUSG00000044626	Liph	0.549812	2e-06	1.99e-05
Guttman_lincRNA_1447	ENSMUSG00000087207	Gm13147	0.549741	2e-06	1.99e-05
Guttman_lincRNA_516_._Ensembl_ENSMUSG00000086454_._Necsulea_ENSMUSG00000086454	ENSMUSG00000024900	Cpt1a	0.549695	2e-06	1.99e-05
Guttman_lincRNA_1447	ENSMUSG00000005148	Klf5	0.549535	2e-06	1.99e-05
Guttman_lincRNA_2551_._Ensembl_ENSMUSG00000078952	ENSMUSG00000027702	Lrrc34	0.549521	2e-06	1.99e-05
Guttman_lincRNA_542_._Ensembl_ENSMUSG00000084762_._Necsulea_ENSMUSG00000084762	ENSMUSG00000025423	Pias2	0.549277	2e-06	1.99e-05
Guttman_lincRNA_516_._Ensembl_ENSMUSG00000086454_._Necsulea_ENSMUSG00000086454	ENSMUSG00000033685	Ucp2	0.549152	2e-06	1.99e-05
Guttman_lincRNA_2551_._Ensembl_ENSMUSG00000078952	ENSMUSG00000025491	Ifitm1	0.549122	2e-06	1.99e-05
Guttman_lincRNA_2551_._Ensembl_ENSMUSG00000078952	ENSMUSG00000022485	Hoxc5	-0.549108	2e-06	1.99e-05
Guttman_lincRNA_2551_._Ensembl_ENSMUSG00000078952	ENSMUSG00000035235	Trim13	0.548885	2e-06	1.99e-05
Guttman_lincRNA_2280_._Necsulea_CUFF.231493	ENSMUSG00000002147	Stat6	0.548583	2e-06	1.99e-05
Guttman_lincRNA_2280_._Necsulea_CUFF.231493	ENSMUSG00000022221	Ripk3	0.548374	2e-06	1.99e-05
Guttman_lincRNA_2485	ENSMUSG00000072419	Dppa2	0.548371	2e-06	1.99e-05
Guttman_lincRNA_2551_._Ensembl_ENSMUSG00000078952	ENSMUSG00000024039	Cbs	0.548369	2e-06	1.99e-05
Guttman_lincRNA_2280_._Necsulea_CUFF.231493	ENSMUSG00000020899	Pfas	0.548356	2e-06	1.99e-05
Guttman_lincRNA_516_._Ensembl_ENSMUSG00000086454_._Necsulea_ENSMUSG00000086454	ENSMUSG00000036202	Rif1	0.548286	2e-06	1.99e-05
Necsulea_Locus_22428_._Guttman_lincRNA_2851_._Necsulea_Locus_21016	ENSMUSG00000021270	Hsp90aa1	0.548146	2e-06	1.99e-05
Guttman_lincRNA_2280_._Necsulea_CUFF.231493	ENSMUSG00000024180	Tmem8	0.548097	2e-06	1.99e-05
Necsulea_Locus_99471_._Guttman_lincRNA_674_._Ensembl_ENSMUSG00000097639	ENSMUSG00000055148	Klf2	0.548	2e-06	1.99e-05
Guttman_lincRNA_2280_._Necsulea_CUFF.231493	ENSMUSG00000022099	Dmtn	0.547987	2e-06	1.99e-05
Ensembl_ENSMUSG00000000031_._Ensembl_ENSMUSG00000099143_._Ensembl_ENSMUSG00000098816	ENSMUSG00000028581	Laptm5	-0.547892	2e-06	1.99e-05
Ensembl_ENSMUSG00000000031_._Ensembl_ENSMUSG00000099143_._Ensembl_ENSMUSG00000098816	ENSMUSG00000007817	Zmiz1	0.547874	2e-06	1.99e-05
Guttman_lincRNA_2551_._Ensembl_ENSMUSG00000078952	ENSMUSG00000025364	Pa2g4	0.547712	2e-06	1.99e-05
Guttman_lincRNA_1716_._Ensembl_ENSMUSG00000074303	ENSMUSG00000041718	Alg13	0.54767	2e-06	1.99e-05
Guttman_lincRNA_2280_._Necsulea_CUFF.231493	ENSMUSG00000041859	Mcm3	0.547614	2e-06	1.99e-05
Guttman_lincRNA_1447	ENSMUSG00000027077	Smtnl1	0.54756	2e-06	1.99e-05
Guttman_lincRNA_2551_._Ensembl_ENSMUSG00000078952	ENSMUSG00000028435	Aqp3	0.547396	2e-06	1.99e-05
Ensembl_ENSMUSG00000000031_._Ensembl_ENSMUSG00000099143_._Ensembl_ENSMUSG00000098816	ENSMUSG00000067919	Rex2	-0.547311	2e-06	1.99e-05
Ensembl_ENSMUSG00000000031_._Ensembl_ENSMUSG00000099143_._Ensembl_ENSMUSG00000098816	ENSMUSG00000078495	Gm13157	-0.547225	2e-06	1.99e-05
Ensembl_ENSMUSG00000056579_._Guttman_lincRNA_2207_._Ensembl_ENSMUSG00000099081_._Ensembl_ENSMUSG00000098265_._Ensembl_ENSMUSG00000098503_._Ensembl_ENSMUSG00000098948	ENSMUSG00000067919	Rex2	-0.547191	2e-06	1.99e-05
Ensembl_ENSMUSG00000000031_._Ensembl_ENSMUSG00000099143_._Ensembl_ENSMUSG00000098816	ENSMUSG00000041359	Tcl1	-0.54719	2e-06	1.99e-05
Ensembl_ENSMUSG00000000031_._Ensembl_ENSMUSG00000099143_._Ensembl_ENSMUSG00000098816	ENSMUSG00000074637	Sox2	-0.547147	2e-06	1.99e-05
Guttman_lincRNA_2551_._Ensembl_ENSMUSG00000078952	ENSMUSG00000048087	Gm4737	0.547141	2e-06	1.99e-05
Guttman_lincRNA_2551_._Ensembl_ENSMUSG00000078952	ENSMUSG00000018727	Cpsf4l	0.547061	2e-06	1.99e-05
Necsulea_Locus_99471_._Guttman_lincRNA_674_._Ensembl_ENSMUSG00000097639	ENSMUSG00000028601	Echdc2	0.547039	2e-06	1.99e-05
Guttman_lincRNA_516_._Ensembl_ENSMUSG00000086454_._Necsulea_ENSMUSG00000086454	ENSMUSG00000033983	Coil	0.546916	2e-06	1.99e-05
Guttman_lincRNA_2280_._Necsulea_CUFF.231493	ENSMUSG00000022304	Dpys	0.546866	2e-06	1.99e-05
Guttman_lincRNA_1447	ENSMUSG00000064194	Zfp936	0.546861	2e-06	1.99e-05
Guttman_lincRNA_2280_._Necsulea_CUFF.231493	ENSMUSG00000041548	Hspb8	0.546851	2e-06	1.99e-05
Ensembl_ENSMUSG00000000031_._Ensembl_ENSMUSG00000099143_._Ensembl_ENSMUSG00000098816	ENSMUSG00000039395	Mreg	-0.546795	2e-06	1.99e-05
Guttman_lincRNA_516_._Ensembl_ENSMUSG00000086454_._Necsulea_ENSMUSG00000086454	ENSMUSG00000042808	Gpx2	0.546782	2e-06	1.99e-05
Guttman_lincRNA_2551_._Ensembl_ENSMUSG00000078952	ENSMUSG00000033826	Dnah8	0.54658	2e-06	1.99e-05
Guttman_lincRNA_516_._Ensembl_ENSMUSG00000086454_._Necsulea_ENSMUSG00000086454	ENSMUSG00000030717	Nupr1	0.546443	2e-06	1.99e-05
Guttman_lincRNA_1447	ENSMUSG00000016319	Slc25a5	0.546432	2e-06	1.99e-05
Guttman_lincRNA_1447	Guttman_lincRNA_2454		0.546414	2e-06	1.99e-05
Ensembl_ENSMUSG00000000031_._Ensembl_ENSMUSG00000099143_._Ensembl_ENSMUSG00000098816	ENSMUSG00000000486	2001-09-01	-0.54636	2e-06	1.99e-05
Guttman_lincRNA_516_._Ensembl_ENSMUSG00000086454_._Necsulea_ENSMUSG00000086454	ENSMUSG00000022710	Usp7	0.54635	2e-06	1.99e-05
Ensembl_ENSMUSG00000000031_._Ensembl_ENSMUSG00000099143_._Ensembl_ENSMUSG00000098816	ENSMUSG00000054753	AU018091	-0.546167	2e-06	1.99e-05
Ensembl_ENSMUSG00000000031_._Ensembl_ENSMUSG00000099143_._Ensembl_ENSMUSG00000098816	ENSMUSG00000038587	Akap12	-0.546139	2e-06	1.99e-05
Necsulea_Locus_99471_._Guttman_lincRNA_674_._Ensembl_ENSMUSG00000097639	ENSMUSG00000073403	Gm10499	0.546043	2e-06	1.99e-05
Guttman_lincRNA_516_._Ensembl_ENSMUSG00000086454_._Necsulea_ENSMUSG00000086454	ENSMUSG00000039329	Tex19.1	0.546037	2e-06	1.99e-05
Guttman_lincRNA_1716_._Ensembl_ENSMUSG00000074303	ENSMUSG00000052776	Oas1a	0.545925	2e-06	1.99e-05
Guttman_lincRNA_2485	Ensembl_ENSMUSG00000092349		0.545719	2e-06	1.99e-05
Guttman_lincRNA_2485	ENSMUSG00000039682	Lap3	0.5456	2e-06	1.99e-05
Guttman_lincRNA_516_._Ensembl_ENSMUSG00000086454_._Necsulea_ENSMUSG00000086454	ENSMUSG00000034203	Chchd4	0.545284	2e-06	1.99e-05
Ensembl_ENSMUSG00000092349	ENSMUSG00000049422	Chchd10	0.54502	2e-06	1.99e-05
Ensembl_ENSMUSG00000000031_._Ensembl_ENSMUSG00000099143_._Ensembl_ENSMUSG00000098816	ENSMUSG00000041718	Alg13	-0.544927	2e-06	1.99e-05
Guttman_lincRNA_1447	ENSMUSG00000040564	Apoc1	0.544879	2e-06	1.99e-05
Guttman_lincRNA_1447	ENSMUSG00000022682	Rrn3	0.544865	2e-06	1.99e-05
Necsulea_Locus_99471_._Guttman_lincRNA_674_._Ensembl_ENSMUSG00000097639	Ensembl_ENSMUSG00000092349		0.544852	2e-06	1.99e-05
Guttman_lincRNA_516_._Ensembl_ENSMUSG00000086454_._Necsulea_ENSMUSG00000086454	ENSMUSG00000027452	Acss1	0.544842	2e-06	1.99e-05
Guttman_lincRNA_516_._Ensembl_ENSMUSG00000086454_._Necsulea_ENSMUSG00000086454	ENSMUSG00000027233	Patl2	0.544766	2e-06	1.99e-05
Ensembl_ENSMUSG00000000031_._Ensembl_ENSMUSG00000099143_._Ensembl_ENSMUSG00000098816	ENSMUSG00000025287	Acot9	-0.544511	2e-06	1.99e-05
Guttman_lincRNA_2174	ENSMUSG00000030793	Pycard	0.544012	2e-06	1.99e-05
Guttman_lincRNA_2280_._Necsulea_CUFF.231493	ENSMUSG00000027077	Smtnl1	0.544005	2e-06	1.99e-05
Guttman_lincRNA_1716_._Ensembl_ENSMUSG00000074303	Guttman_lincRNA_2485		0.543937	2e-06	1.99e-05
Ensembl_ENSMUSG00000000031_._Ensembl_ENSMUSG00000099143_._Ensembl_ENSMUSG00000098816	ENSMUSG00000063171	Rps4y2	-0.543699	2e-06	1.99e-05
Guttman_lincRNA_516_._Ensembl_ENSMUSG00000086454_._Necsulea_ENSMUSG00000086454	ENSMUSG00000036036	Zfp57	0.543652	2e-06	1.99e-05
Guttman_lincRNA_2485	ENSMUSG00000029249	Rest	0.543624	2e-06	1.99e-05
Guttman_lincRNA_2280_._Necsulea_CUFF.231493	ENSMUSG00000051316	Taf7	0.543548	2e-06	1.99e-05
Guttman_lincRNA_2551_._Ensembl_ENSMUSG00000078952	ENSMUSG00000025937	Lactb2	0.54352	2e-06	1.99e-05
Ensembl_ENSMUSG00000000031_._Ensembl_ENSMUSG00000099143_._Ensembl_ENSMUSG00000098816	ENSMUSG00000020644	Id2	0.543444	2e-06	1.99e-05
Guttman_lincRNA_2551_._Ensembl_ENSMUSG00000078952	ENSMUSG00000028581	Laptm5	0.543285	2e-06	1.99e-05
Guttman_lincRNA_2551_._Ensembl_ENSMUSG00000078952	ENSMUSG00000002985	Apoe	0.543252	2e-06	1.99e-05
Guttman_lincRNA_1716_._Ensembl_ENSMUSG00000074303	ENSMUSG00000030619	Eed	0.543215	2e-06	1.99e-05
Guttman_lincRNA_1716_._Ensembl_ENSMUSG00000074303	ENSMUSG00000021127	Zfp36l1	-0.543171	2e-06	1.99e-05
Ensembl_ENSMUSG00000056579_._Guttman_lincRNA_2207_._Ensembl_ENSMUSG00000099081_._Ensembl_ENSMUSG00000098265_._Ensembl_ENSMUSG00000098503_._Ensembl_ENSMUSG00000098948	ENSMUSG00000001056	Nhp2	-0.543145	2e-06	1.99e-05
Necsulea_Locus_22428_._Guttman_lincRNA_2851_._Necsulea_Locus_21016	Ensembl_ENSMUSG00000092349		0.543025	2e-06	1.99e-05
Guttman_lincRNA_516_._Ensembl_ENSMUSG00000086454_._Necsulea_ENSMUSG00000086454	ENSMUSG00000039145	Camk1d	0.542941	2e-06	1.99e-05
Guttman_lincRNA_542_._Ensembl_ENSMUSG00000084762_._Necsulea_ENSMUSG00000084762	ENSMUSG00000016319	Slc25a5	0.542879	2e-06	1.99e-05
Guttman_lincRNA_2032	ENSMUSG00000022682	Rrn3	0.542828	2e-06	1.99e-05
Guttman_lincRNA_2280_._Necsulea_CUFF.231493	ENSMUSG00000059552	Trp53	0.542794	2e-06	1.99e-05
Guttman_lincRNA_516_._Ensembl_ENSMUSG00000086454_._Necsulea_ENSMUSG00000086454	ENSMUSG00000095834	Tdgf1-ps1	0.542777	2e-06	1.99e-05
Guttman_lincRNA_2454	ENSMUSG00000013766	Ly6g6e	0.542579	2e-06	1.99e-05
Guttman_lincRNA_1716_._Ensembl_ENSMUSG00000074303	ENSMUSG00000037860	Aim2	0.542577	2e-06	1.99e-05
Ensembl_ENSMUSG00000000031_._Ensembl_ENSMUSG00000099143_._Ensembl_ENSMUSG00000098816	ENSMUSG00000001604	Tcea3	-0.542475	2e-06	1.99e-05
Ensembl_ENSMUSG00000000031_._Ensembl_ENSMUSG00000099143_._Ensembl_ENSMUSG00000098816	ENSMUSG00000021127	Zfp36l1	0.542347	2e-06	1.99e-05
Guttman_lincRNA_516_._Ensembl_ENSMUSG00000086454_._Necsulea_ENSMUSG00000086454	ENSMUSG00000033863	Klf9	0.542175	2e-06	1.99e-05
Ensembl_ENSMUSG00000000031_._Ensembl_ENSMUSG00000099143_._Ensembl_ENSMUSG00000098816	ENSMUSG00000038045	Sult6b1	-0.542153	2e-06	1.99e-05
Guttman_lincRNA_1716_._Ensembl_ENSMUSG00000074303	ENSMUSG00000038700	Hoxb5	-0.542103	2e-06	1.99e-05
Guttman_lincRNA_1447	ENSMUSG00000063856	Gpx1	0.542091	2e-06	1.99e-05
Guttman_lincRNA_2551_._Ensembl_ENSMUSG00000078952	ENSMUSG00000039145	Camk1d	0.542019	2e-06	1.99e-05
Guttman_lincRNA_1716_._Ensembl_ENSMUSG00000074303	ENSMUSG00000054766	Set	0.541914	2e-06	1.99e-05
Ensembl_ENSMUSG00000000031_._Ensembl_ENSMUSG00000099143_._Ensembl_ENSMUSG00000098816	ENSMUSG00000024422	Dhx16	-0.541677	2e-06	1.99e-05
Guttman_lincRNA_2551_._Ensembl_ENSMUSG00000078952	ENSMUSG00000094942	Gm3604	0.541654	2e-06	1.99e-05
Guttman_lincRNA_2454	ENSMUSG00000031584	Gsr	0.541574	2e-06	1.99e-05
Guttman_lincRNA_2551_._Ensembl_ENSMUSG00000078952	ENSMUSG00000022114	Spry2	0.541562	2e-06	1.99e-05
Guttman_lincRNA_2174	ENSMUSG00000042751	Nmnat2	0.541509	2e-06	1.99e-05
Necsulea_Locus_22428_._Guttman_lincRNA_2851_._Necsulea_Locus_21016	Guttman_lincRNA_2454		0.541438	2e-06	1.99e-05
Guttman_lincRNA_2485	Guttman_lincRNA_2174		0.541422	2e-06	1.99e-05
Guttman_lincRNA_2485	ENSMUSG00000028773	Fabp3	0.54121	2e-06	1.99e-05
Ensembl_ENSMUSG00000000031_._Ensembl_ENSMUSG00000099143_._Ensembl_ENSMUSG00000098816	ENSMUSG00000064194	Zfp936	-0.54101	2e-06	1.99e-05
Guttman_lincRNA_1447	ENSMUSG00000025255	Zfhx4	-0.54086	2e-06	1.99e-05
Guttman_lincRNA_2551_._Ensembl_ENSMUSG00000078952	ENSMUSG00000031651	Triml1	0.540754	2e-06	1.99e-05
Guttman_lincRNA_516_._Ensembl_ENSMUSG00000086454_._Necsulea_ENSMUSG00000086454	ENSMUSG00000034832	Tet3	-0.540664	2e-06	1.99e-05
Guttman_lincRNA_2551_._Ensembl_ENSMUSG00000078952	ENSMUSG00000027010	Slc25a12	0.540607	2e-06	1.99e-05
Guttman_lincRNA_1447	ENSMUSG00000037860	Aim2	0.540446	2e-06	1.99e-05
Guttman_lincRNA_2280_._Necsulea_CUFF.231493	ENSMUSG00000032449	Slc25a36	0.54038	2e-06	1.99e-05
Guttman_lincRNA_2454	ENSMUSG00000040785	Ttc3	-0.540211	2e-06	1.99e-05
Guttman_lincRNA_2280_._Necsulea_CUFF.231493	ENSMUSG00000048087	Gm4737	0.5402	2e-06	1.99e-05
Necsulea_Locus_22428_._Guttman_lincRNA_2851_._Necsulea_Locus_21016	Necsulea_Locus_99471_._Guttman_lincRNA_674_._Ensembl_ENSMUSG00000097639		0.540048	2e-06	1.99e-05
Ensembl_ENSMUSG00000000031_._Ensembl_ENSMUSG00000099143_._Ensembl_ENSMUSG00000098816	ENSMUSG00000023902	Zscan10	-0.540033	2e-06	1.99e-05
Guttman_lincRNA_516_._Ensembl_ENSMUSG00000086454_._Necsulea_ENSMUSG00000086454	ENSMUSG00000001604	Tcea3	0.539956	2e-06	1.99e-05
Guttman_lincRNA_2551_._Ensembl_ENSMUSG00000078952	ENSMUSG00000038526	Car14	-0.539861	2e-06	1.99e-05
Guttman_lincRNA_516_._Ensembl_ENSMUSG00000086454_._Necsulea_ENSMUSG00000086454	ENSMUSG00000020899	Pfas	0.539649	2e-06	1.99e-05
Guttman_lincRNA_1716_._Ensembl_ENSMUSG00000074303	ENSMUSG00000006818	Sod2	0.539537	2e-06	1.99e-05
Guttman_lincRNA_2280_._Necsulea_CUFF.231493	ENSMUSG00000092335	Gm7221	0.539436	2e-06	1.99e-05
Guttman_lincRNA_1447	ENSMUSG00000001228	Uhrf1	0.539378	2e-06	1.99e-05
Guttman_lincRNA_516_._Ensembl_ENSMUSG00000086454_._Necsulea_ENSMUSG00000086454	ENSMUSG00000067860	Zic3	0.539378	2e-06	1.99e-05
Guttman_lincRNA_516_._Ensembl_ENSMUSG00000086454_._Necsulea_ENSMUSG00000086454	ENSMUSG00000096696	Zfp960	0.539309	2e-06	1.99e-05
Guttman_lincRNA_2551_._Ensembl_ENSMUSG00000078952	ENSMUSG00000022710	Usp7	0.539263	2e-06	1.99e-05
Guttman_lincRNA_2485	ENSMUSG00000028807	Zbtb8a	0.539216	2e-06	1.99e-05
Guttman_lincRNA_516_._Ensembl_ENSMUSG00000086454_._Necsulea_ENSMUSG00000086454	ENSMUSG00000033826	Dnah8	0.539124	2e-06	1.99e-05
Guttman_lincRNA_1716_._Ensembl_ENSMUSG00000074303	ENSMUSG00000027018	Hat1	0.538806	2e-06	1.99e-05
Ensembl_ENSMUSG00000000031_._Ensembl_ENSMUSG00000099143_._Ensembl_ENSMUSG00000098816	ENSMUSG00000018411	Mapt	-0.538759	2e-06	1.99e-05
Guttman_lincRNA_2551_._Ensembl_ENSMUSG00000078952	ENSMUSG00000018239	Zcchc10	0.538724	2e-06	1.99e-05
Guttman_lincRNA_2551_._Ensembl_ENSMUSG00000078952	ENSMUSG00000034832	Tet3	-0.538717	2e-06	1.99e-05
Guttman_lincRNA_516_._Ensembl_ENSMUSG00000086454_._Necsulea_ENSMUSG00000086454	ENSMUSG00000029512	Ulk1	0.538624	2e-06	1.99e-05
Ensembl_ENSMUSG00000000031_._Ensembl_ENSMUSG00000099143_._Ensembl_ENSMUSG00000098816	Necsulea_Locus_99471_._Guttman_lincRNA_674_._Ensembl_ENSMUSG00000097639		-0.538608	2e-06	1.99e-05
Guttman_lincRNA_1447	ENSMUSG00000007817	Zmiz1	-0.538548	2e-06	1.99e-05
Guttman_lincRNA_1447	Guttman_lincRNA_2485		0.538508	2e-06	1.99e-05
Guttman_lincRNA_516_._Ensembl_ENSMUSG00000086454_._Necsulea_ENSMUSG00000086454	ENSMUSG00000001270	Ckb	0.538421	2e-06	1.99e-05
Guttman_lincRNA_2454	ENSMUSG00000017548	Suz12	0.538368	2e-06	1.99e-05
Necsulea_Locus_99471_._Guttman_lincRNA_674_._Ensembl_ENSMUSG00000097639	ENSMUSG00000024140	Epas1	0.538185	2e-06	1.99e-05
Guttman_lincRNA_2551_._Ensembl_ENSMUSG00000078952	ENSMUSG00000032279	Idh3a	0.538064	2e-06	1.99e-05
Guttman_lincRNA_1447	ENSMUSG00000027018	Hat1	0.537937	2e-06	1.99e-05
Ensembl_ENSMUSG00000092349	ENSMUSG00000011179	Odc1	0.537931	2e-06	1.99e-05
Guttman_lincRNA_1447	Ensembl_ENSMUSG00000092349		0.537921	2e-06	1.99e-05
Guttman_lincRNA_2280_._Necsulea_CUFF.231493	ENSMUSG00000036743	Psma8	0.53787	2e-06	1.99e-05
Ensembl_ENSMUSG00000092349	ENSMUSG00000020899	Pfas	0.537845	2e-06	1.99e-05
Guttman_lincRNA_2551_._Ensembl_ENSMUSG00000078952	ENSMUSG00000022892	App	-0.537682	2e-06	1.99e-05
Guttman_lincRNA_2551_._Ensembl_ENSMUSG00000078952	ENSMUSG00000090744	Gm6871	0.537596	2e-06	1.99e-05
Guttman_lincRNA_1716_._Ensembl_ENSMUSG00000074303	ENSMUSG00000015354	Pcolce2	0.537534	2e-06	1.99e-05
Guttman_lincRNA_516_._Ensembl_ENSMUSG00000086454_._Necsulea_ENSMUSG00000086454	ENSMUSG00000069171	Nr2f1	-0.537507	2e-06	1.99e-05
Ensembl_ENSMUSG00000000031_._Ensembl_ENSMUSG00000099143_._Ensembl_ENSMUSG00000098816	ENSMUSG00000027702	Lrrc34	-0.53746	2e-06	1.99e-05
Ensembl_ENSMUSG00000056579_._Guttman_lincRNA_2207_._Ensembl_ENSMUSG00000099081_._Ensembl_ENSMUSG00000098265_._Ensembl_ENSMUSG00000098503_._Ensembl_ENSMUSG00000098948	ENSMUSG00000005566	Trim28	-0.537296	2e-06	1.99e-05
Guttman_lincRNA_1447	ENSMUSG00000032387	Rbpms2	0.537109	2e-06	1.99e-05
Guttman_lincRNA_1716_._Ensembl_ENSMUSG00000074303	ENSMUSG00000063856	Gpx1	0.536984	2e-06	1.99e-05
Guttman_lincRNA_2454	ENSMUSG00000038515	Grtp1	0.53694	2e-06	1.99e-05
Guttman_lincRNA_516_._Ensembl_ENSMUSG00000086454_._Necsulea_ENSMUSG00000086454	Guttman_lincRNA_1394_._Necsulea_Locus_93819_._Necsulea_Locus_92889_._Guttman_lincRNA_1395_._Necsulea_Locus_92697		0.536896	2e-06	1.99e-05
Guttman_lincRNA_2551_._Ensembl_ENSMUSG00000078952	ENSMUSG00000024359	Hspa9	0.536886	2e-06	1.99e-05
Guttman_lincRNA_2280_._Necsulea_CUFF.231493	ENSMUSG00000022710	Usp7	0.536754	2e-06	1.99e-05
Guttman_lincRNA_2551_._Ensembl_ENSMUSG00000078952	ENSMUSG00000075394	Hoxc4	-0.536732	2e-06	1.99e-05
Guttman_lincRNA_2174	ENSMUSG00000049422	Chchd10	0.536648	2e-06	1.99e-05
Guttman_lincRNA_2551_._Ensembl_ENSMUSG00000078952	ENSMUSG00000003235	Eif2b5	0.536614	2e-06	1.99e-05
Guttman_lincRNA_1447	ENSMUSG00000059552	Trp53	0.536596	2e-06	1.99e-05
Ensembl_ENSMUSG00000000031_._Ensembl_ENSMUSG00000099143_._Ensembl_ENSMUSG00000098816	ENSMUSG00000038253	Hoxa5	0.536552	2e-06	1.99e-05
Guttman_lincRNA_2174	ENSMUSG00000054766	Set	0.536466	2e-06	1.99e-05
Ensembl_ENSMUSG00000092349	ENSMUSG00000025151	Maged1	-0.536438	2e-06	1.99e-05
Guttman_lincRNA_2551_._Ensembl_ENSMUSG00000078952	ENSMUSG00000024598	Fbn2	-0.536419	2e-06	1.99e-05
Necsulea_Locus_99471_._Guttman_lincRNA_674_._Ensembl_ENSMUSG00000097639	ENSMUSG00000038700	Hoxb5	-0.536353	2e-06	1.99e-05
Necsulea_Locus_99471_._Guttman_lincRNA_674_._Ensembl_ENSMUSG00000097639	ENSMUSG00000032309	Fbxo22	0.536269	2e-06	1.99e-05
Guttman_lincRNA_2485	ENSMUSG00000047751	Utf1	0.536257	2e-06	1.99e-05
Guttman_lincRNA_2485	ENSMUSG00000025364	Pa2g4	0.53625	2e-06	1.99e-05
Guttman_lincRNA_2454	ENSMUSG00000028109	Hormad1	0.536244	2e-06	1.99e-05
Guttman_lincRNA_2551_._Ensembl_ENSMUSG00000078952	ENSMUSG00000055639	Dach1	-0.536042	2e-06	1.99e-05
Guttman_lincRNA_542_._Ensembl_ENSMUSG00000084762_._Necsulea_ENSMUSG00000084762	ENSMUSG00000023393	Slc17a9	0.535903	2e-06	1.99e-05
Ensembl_ENSMUSG00000000031_._Ensembl_ENSMUSG00000099143_._Ensembl_ENSMUSG00000098816	ENSMUSG00000092035	Peg10	0.53576	2e-06	1.99e-05
Guttman_lincRNA_2551_._Ensembl_ENSMUSG00000078952	ENSMUSG00000068245	Phf11d	0.535745	2e-06	1.99e-05
Guttman_lincRNA_2280_._Necsulea_CUFF.231493	ENSMUSG00000067860	Zic3	0.535688	2e-06	1.99e-05
Guttman_lincRNA_2280_._Necsulea_CUFF.231493	ENSMUSG00000003235	Eif2b5	0.535603	2e-06	1.99e-05
Guttman_lincRNA_516_._Ensembl_ENSMUSG00000086454_._Necsulea_ENSMUSG00000086454	ENSMUSG00000037188	Grhl3	0.535484	2e-06	1.99e-05
Guttman_lincRNA_2485	ENSMUSG00000041718	Alg13	0.535461	2e-06	1.99e-05
Ensembl_ENSMUSG00000000031_._Ensembl_ENSMUSG00000099143_._Ensembl_ENSMUSG00000098816	ENSMUSG00000020899	Pfas	-0.535377	2e-06	1.99e-05
Necsulea_Locus_99471_._Guttman_lincRNA_674_._Ensembl_ENSMUSG00000097639	Guttman_lincRNA_542_._Ensembl_ENSMUSG00000084762_._Necsulea_ENSMUSG00000084762		0.535298	2e-06	1.99e-05
Guttman_lincRNA_2454	ENSMUSG00000022304	Dpys	0.535228	2e-06	1.99e-05
Guttman_lincRNA_2485	ENSMUSG00000022710	Usp7	0.535208	2e-06	1.99e-05
Guttman_lincRNA_1447	ENSMUSG00000029249	Rest	0.53518	2e-06	1.99e-05
Guttman_lincRNA_516_._Ensembl_ENSMUSG00000086454_._Necsulea_ENSMUSG00000086454	Guttman_lincRNA_2174		0.535142	2e-06	1.99e-05
Ensembl_ENSMUSG00000000031_._Ensembl_ENSMUSG00000099143_._Ensembl_ENSMUSG00000098816	ENSMUSG00000076431	Sox4	0.535116	2e-06	1.99e-05
Guttman_lincRNA_2280_._Necsulea_CUFF.231493	ENSMUSG00000075394	Hoxc4	-0.535007	2e-06	1.99e-05
Guttman_lincRNA_2280_._Necsulea_CUFF.231493	ENSMUSG00000015354	Pcolce2	0.534882	2e-06	1.99e-05
Guttman_lincRNA_2551_._Ensembl_ENSMUSG00000078952	ENSMUSG00000025630	Hprt	0.534658	2e-06	1.99e-05
Ensembl_ENSMUSG00000000031_._Ensembl_ENSMUSG00000099143_._Ensembl_ENSMUSG00000098816	ENSMUSG00000026288	Inpp5d	-0.534504	2e-06	1.99e-05
Guttman_lincRNA_2551_._Ensembl_ENSMUSG00000078952	ENSMUSG00000067377	Tspan6	-0.534485	2e-06	1.99e-05
Guttman_lincRNA_2280_._Necsulea_CUFF.231493	ENSMUSG00000021360	Gcnt2	0.534428	2e-06	1.99e-05
Guttman_lincRNA_1716_._Ensembl_ENSMUSG00000074303	ENSMUSG00000055653	Gpc3	-0.534403	2e-06	1.99e-05
Guttman_lincRNA_1716_._Ensembl_ENSMUSG00000074303	ENSMUSG00000039682	Lap3	0.534312	2e-06	1.99e-05
Necsulea_Locus_99471_._Guttman_lincRNA_674_._Ensembl_ENSMUSG00000097639	ENSMUSG00000001228	Uhrf1	0.534099	2e-06	1.99e-05
Guttman_lincRNA_516_._Ensembl_ENSMUSG00000086454_._Necsulea_ENSMUSG00000086454	ENSMUSG00000074867	Zfp808	0.534078	2e-06	1.99e-05
Guttman_lincRNA_516_._Ensembl_ENSMUSG00000086454_._Necsulea_ENSMUSG00000086454	ENSMUSG00000026917	Wdr5	0.53397	2e-06	1.99e-05
Guttman_lincRNA_2280_._Necsulea_CUFF.231493	ENSMUSG00000026917	Wdr5	0.533945	2e-06	1.99e-05
Guttman_lincRNA_542_._Ensembl_ENSMUSG00000084762_._Necsulea_ENSMUSG00000084762	ENSMUSG00000036202	Rif1	0.53389	2e-06	1.99e-05
Guttman_lincRNA_1447	ENSMUSG00000024725	Ostf1	0.53388	2e-06	1.99e-05
Guttman_lincRNA_1716_._Ensembl_ENSMUSG00000074303	ENSMUSG00000051747	Ttn	0.533797	2e-06	1.99e-05
Guttman_lincRNA_542_._Ensembl_ENSMUSG00000084762_._Necsulea_ENSMUSG00000084762	ENSMUSG00000092335	Gm7221	0.533759	2e-06	1.99e-05
Guttman_lincRNA_542_._Ensembl_ENSMUSG00000084762_._Necsulea_ENSMUSG00000084762	ENSMUSG00000031584	Gsr	0.533642	2e-06	1.99e-05
Guttman_lincRNA_1447	ENSMUSG00000022034	Esco2	0.533538	2e-06	1.99e-05
Ensembl_ENSMUSG00000000031_._Ensembl_ENSMUSG00000099143_._Ensembl_ENSMUSG00000098816	ENSMUSG00000074887	EU599041	-0.533458	2e-06	1.99e-05
Ensembl_ENSMUSG00000000031_._Ensembl_ENSMUSG00000099143_._Ensembl_ENSMUSG00000098816	ENSMUSG00000079560	Hoxa3	0.533443	2e-06	1.99e-05
Ensembl_ENSMUSG00000000031_._Ensembl_ENSMUSG00000099143_._Ensembl_ENSMUSG00000098816	ENSMUSG00000017453	Pipox	-0.533359	2e-06	1.99e-05
Guttman_lincRNA_2485	ENSMUSG00000062929	Cfl2	-0.533325	2e-06	1.99e-05
Guttman_lincRNA_2280_._Necsulea_CUFF.231493	ENSMUSG00000035235	Trim13	0.533149	2e-06	1.99e-05
Ensembl_ENSMUSG00000000031_._Ensembl_ENSMUSG00000099143_._Ensembl_ENSMUSG00000098816	ENSMUSG00000030717	Nupr1	-0.533129	2e-06	1.99e-05
Guttman_lincRNA_2485	ENSMUSG00000018411	Mapt	0.532929	2e-06	1.99e-05
Guttman_lincRNA_1716_._Ensembl_ENSMUSG00000074303	ENSMUSG00000030041	M1ap	0.532804	2e-06	1.99e-05
Guttman_lincRNA_1447	ENSMUSG00000030619	Eed	0.532744	2e-06	1.99e-05
Guttman_lincRNA_2454	ENSMUSG00000024180	Tmem8	0.532719	2e-06	1.99e-05
Guttman_lincRNA_2551_._Ensembl_ENSMUSG00000078952	ENSMUSG00000047139	Cd24a	-0.532683	2e-06	1.99e-05
Guttman_lincRNA_2280_._Necsulea_CUFF.231493	ENSMUSG00000001131	Timp1	0.532628	2e-06	1.99e-05
Ensembl_ENSMUSG00000092349	ENSMUSG00000038692	Hoxb4	-0.532606	2e-06	1.99e-05
Necsulea_Locus_22428_._Guttman_lincRNA_2851_._Necsulea_Locus_21016	ENSMUSG00000024406	Pou5f1	0.532574	2e-06	1.99e-05
Guttman_lincRNA_2485	ENSMUSG00000024039	Cbs	0.53253	2e-06	1.99e-05
Guttman_lincRNA_542_._Ensembl_ENSMUSG00000084762_._Necsulea_ENSMUSG00000084762	ENSMUSG00000024359	Hspa9	0.532509	2e-06	1.99e-05
Ensembl_ENSMUSG00000000031_._Ensembl_ENSMUSG00000099143_._Ensembl_ENSMUSG00000098816	ENSMUSG00000005370	Msh6	-0.532433	2e-06	1.99e-05
Guttman_lincRNA_516_._Ensembl_ENSMUSG00000086454_._Necsulea_ENSMUSG00000086454	ENSMUSG00000028760	Eif4g3	-0.532363	2e-06	1.99e-05
Guttman_lincRNA_1716_._Ensembl_ENSMUSG00000074303	Guttman_lincRNA_542_._Ensembl_ENSMUSG00000084762_._Necsulea_ENSMUSG00000084762		0.532271	2e-06	1.99e-05
Guttman_lincRNA_1716_._Ensembl_ENSMUSG00000074303	ENSMUSG00000038172	Ttc39b	0.532151	2e-06	1.99e-05
Guttman_lincRNA_2454	ENSMUSG00000020089	Ppa1	0.53212	2e-06	1.99e-05
Necsulea_Locus_22428_._Guttman_lincRNA_2851_._Necsulea_Locus_21016	ENSMUSG00000064194	Zfp936	0.532072	2e-06	1.99e-05
Guttman_lincRNA_2454	ENSMUSG00000028528	Dnajc6	0.531891	2e-06	1.99e-05
Necsulea_Locus_99471_._Guttman_lincRNA_674_._Ensembl_ENSMUSG00000097639	ENSMUSG00000075394	Hoxc4	-0.531872	2e-06	1.99e-05
Guttman_lincRNA_516_._Ensembl_ENSMUSG00000086454_._Necsulea_ENSMUSG00000086454	ENSMUSG00000027547	Sall4	0.531851	2e-06	1.99e-05
Guttman_lincRNA_2551_._Ensembl_ENSMUSG00000078952	ENSMUSG00000033685	Ucp2	0.531694	2e-06	1.99e-05
Guttman_lincRNA_516_._Ensembl_ENSMUSG00000086454_._Necsulea_ENSMUSG00000086454	ENSMUSG00000036743	Psma8	0.531689	2e-06	1.99e-05
Guttman_lincRNA_516_._Ensembl_ENSMUSG00000086454_._Necsulea_ENSMUSG00000086454	ENSMUSG00000061062	Gm10093	0.531594	2e-06	1.99e-05
Guttman_lincRNA_2551_._Ensembl_ENSMUSG00000078952	ENSMUSG00000036986	Pml	0.531556	2e-06	1.99e-05
Guttman_lincRNA_1447	ENSMUSG00000041718	Alg13	0.53126	2e-06	1.99e-05
Guttman_lincRNA_1447	ENSMUSG00000038028	9630033F20Rik	0.531255	2e-06	1.99e-05
Guttman_lincRNA_516_._Ensembl_ENSMUSG00000086454_._Necsulea_ENSMUSG00000086454	ENSMUSG00000032279	Idh3a	0.531079	2e-06	1.99e-05
Guttman_lincRNA_516_._Ensembl_ENSMUSG00000086454_._Necsulea_ENSMUSG00000086454	ENSMUSG00000038515	Grtp1	0.530761	2e-06	1.99e-05
Necsulea_Locus_99471_._Guttman_lincRNA_674_._Ensembl_ENSMUSG00000097639	ENSMUSG00000029007	Agtrap	0.530723	2e-06	1.99e-05
Guttman_lincRNA_2485	ENSMUSG00000040785	Ttc3	-0.530615	2e-06	1.99e-05
Ensembl_ENSMUSG00000000031_._Ensembl_ENSMUSG00000099143_._Ensembl_ENSMUSG00000098816	ENSMUSG00000052776	Oas1a	-0.530615	2e-06	1.99e-05
Ensembl_ENSMUSG00000000031_._Ensembl_ENSMUSG00000099143_._Ensembl_ENSMUSG00000098816	ENSMUSG00000092225	Gm2381	-0.530583	2e-06	1.99e-05
Guttman_lincRNA_2280_._Necsulea_CUFF.231493	ENSMUSG00000038515	Grtp1	0.530575	2e-06	1.99e-05
Guttman_lincRNA_516_._Ensembl_ENSMUSG00000086454_._Necsulea_ENSMUSG00000086454	ENSMUSG00000024359	Hspa9	0.530524	2e-06	1.99e-05
Necsulea_Locus_99471_._Guttman_lincRNA_674_._Ensembl_ENSMUSG00000097639	ENSMUSG00000018377	Vezf1	-0.530518	2e-06	1.99e-05
Guttman_lincRNA_1716_._Ensembl_ENSMUSG00000074303	Necsulea_Locus_99471_._Guttman_lincRNA_674_._Ensembl_ENSMUSG00000097639		0.53051	2e-06	1.99e-05
Guttman_lincRNA_2454	ENSMUSG00000028807	Zbtb8a	0.530499	2e-06	1.99e-05
Guttman_lincRNA_2551_._Ensembl_ENSMUSG00000078952	ENSMUSG00000066652	Lefty2	0.530428	2e-06	1.99e-05
Guttman_lincRNA_516_._Ensembl_ENSMUSG00000086454_._Necsulea_ENSMUSG00000086454	ENSMUSG00000030536	Iqgap1	0.530384	2e-06	1.99e-05
Guttman_lincRNA_542_._Ensembl_ENSMUSG00000084762_._Necsulea_ENSMUSG00000084762	ENSMUSG00000025503	Taldo1	0.53034	2e-06	1.99e-05
Guttman_lincRNA_516_._Ensembl_ENSMUSG00000086454_._Necsulea_ENSMUSG00000086454	ENSMUSG00000042414	Prdm14	0.530282	2e-06	1.99e-05
Necsulea_Locus_22428_._Guttman_lincRNA_2851_._Necsulea_Locus_21016	ENSMUSG00000027018	Hat1	0.530275	2e-06	1.99e-05
Guttman_lincRNA_2174	ENSMUSG00000076441	Ass1	0.530264	2e-06	1.99e-05
Guttman_lincRNA_2551_._Ensembl_ENSMUSG00000078952	ENSMUSG00000029844	Hoxa1	-0.530243	2e-06	1.99e-05
Ensembl_ENSMUSG00000000031_._Ensembl_ENSMUSG00000099143_._Ensembl_ENSMUSG00000098816	ENSMUSG00000022034	Esco2	-0.530197	2e-06	1.99e-05
Ensembl_ENSMUSG00000000031_._Ensembl_ENSMUSG00000099143_._Ensembl_ENSMUSG00000098816	Guttman_lincRNA_2454		-0.530142	2e-06	1.99e-05
Guttman_lincRNA_2551_._Ensembl_ENSMUSG00000078952	ENSMUSG00000013766	Ly6g6e	0.529948	2e-06	1.99e-05
Guttman_lincRNA_2454	ENSMUSG00000017561	Crlf3	0.529916	2e-06	1.99e-05
Guttman_lincRNA_1447	ENSMUSG00000076441	Ass1	0.5299	2e-06	1.99e-05
Guttman_lincRNA_2551_._Ensembl_ENSMUSG00000078952	ENSMUSG00000025151	Maged1	-0.529899	2e-06	1.99e-05
Guttman_lincRNA_2454	ENSMUSG00000022710	Usp7	0.529803	2e-06	1.99e-05
Guttman_lincRNA_516_._Ensembl_ENSMUSG00000086454_._Necsulea_ENSMUSG00000086454	ENSMUSG00000055639	Dach1	-0.529787	2e-06	1.99e-05
Guttman_lincRNA_2551_._Ensembl_ENSMUSG00000078952	ENSMUSG00000000275	Trim25	0.529766	2e-06	1.99e-05
Guttman_lincRNA_516_._Ensembl_ENSMUSG00000086454_._Necsulea_ENSMUSG00000086454	ENSMUSG00000094942	Gm3604	0.529642	2e-06	1.99e-05
Guttman_lincRNA_2551_._Ensembl_ENSMUSG00000078952	ENSMUSG00000001542	Ell2	0.529604	2e-06	1.99e-05
Guttman_lincRNA_516_._Ensembl_ENSMUSG00000086454_._Necsulea_ENSMUSG00000086454	ENSMUSG00000055102	Zfp819	0.529547	2e-06	1.99e-05
Guttman_lincRNA_1447	ENSMUSG00000001604	Tcea3	0.5295	2e-06	1.99e-05
Guttman_lincRNA_1716_._Ensembl_ENSMUSG00000074303	ENSMUSG00000044626	Liph	0.529488	2e-06	1.99e-05
Guttman_lincRNA_2280_._Necsulea_CUFF.231493	ENSMUSG00000028807	Zbtb8a	0.529433	2e-06	1.99e-05
Guttman_lincRNA_2280_._Necsulea_CUFF.231493	ENSMUSG00000034714	Ttyh2	0.529391	2e-06	1.99e-05
Guttman_lincRNA_2280_._Necsulea_CUFF.231493	ENSMUSG00000047412	Zbtb44	0.529313	2e-06	1.99e-05
Ensembl_ENSMUSG00000092349	ENSMUSG00000004187	Kifc2	0.529312	2e-06	1.99e-05
Guttman_lincRNA_2280_._Necsulea_CUFF.231493	ENSMUSG00000025190	Got1	0.52929	2e-06	1.99e-05
Necsulea_Locus_99471_._Guttman_lincRNA_674_._Ensembl_ENSMUSG00000097639	ENSMUSG00000032394	Igdcc3	-0.52918	2e-06	1.99e-05
Guttman_lincRNA_542_._Ensembl_ENSMUSG00000084762_._Necsulea_ENSMUSG00000084762	ENSMUSG00000036743	Psma8	0.529131	2e-06	1.99e-05
Guttman_lincRNA_1447	ENSMUSG00000047146	Tet1	0.528919	2e-06	1.99e-05
Guttman_lincRNA_2551_._Ensembl_ENSMUSG00000078952	ENSMUSG00000032394	Igdcc3	-0.528795	2e-06	1.99e-05
Guttman_lincRNA_516_._Ensembl_ENSMUSG00000086454_._Necsulea_ENSMUSG00000086454	ENSMUSG00000049969	Plekhf2	0.528713	2e-06	1.99e-05
Guttman_lincRNA_516_._Ensembl_ENSMUSG00000086454_._Necsulea_ENSMUSG00000086454	ENSMUSG00000037664	Cdkn1c	-0.528413	2e-06	1.99e-05
Guttman_lincRNA_1716_._Ensembl_ENSMUSG00000074303	ENSMUSG00000028760	Eif4g3	-0.528331	2e-06	1.99e-05
Ensembl_ENSMUSG00000000031_._Ensembl_ENSMUSG00000099143_._Ensembl_ENSMUSG00000098816	ENSMUSG00000091490	Triml2	-0.528307	2e-06	1.99e-05
Ensembl_ENSMUSG00000000031_._Ensembl_ENSMUSG00000099143_._Ensembl_ENSMUSG00000098816	ENSMUSG00000038872	Zfhx3	0.528302	2e-06	1.99e-05
Guttman_lincRNA_2454	Guttman_lincRNA_2174		0.528124	2e-06	1.99e-05
Necsulea_Locus_99471_._Guttman_lincRNA_674_._Ensembl_ENSMUSG00000097639	ENSMUSG00000063856	Gpx1	0.528003	2e-06	1.99e-05
Guttman_lincRNA_2551_._Ensembl_ENSMUSG00000078952	ENSMUSG00000038515	Grtp1	0.527989	2e-06	1.99e-05
Guttman_lincRNA_1447	ENSMUSG00000026202	Tuba4a	0.527981	2e-06	1.99e-05
Guttman_lincRNA_2485	ENSMUSG00000029267	Mtf2	0.527933	2e-06	1.99e-05
Guttman_lincRNA_1447	ENSMUSG00000024406	Pou5f1	0.527921	2e-06	1.99e-05
Guttman_lincRNA_1447	ENSMUSG00000023902	Zscan10	0.527884	2e-06	1.99e-05
Guttman_lincRNA_516_._Ensembl_ENSMUSG00000086454_._Necsulea_ENSMUSG00000086454	ENSMUSG00000031432	Prps1	0.527669	2e-06	1.99e-05
Ensembl_ENSMUSG00000000031_._Ensembl_ENSMUSG00000099143_._Ensembl_ENSMUSG00000098816	ENSMUSG00000025937	Lactb2	-0.527469	2e-06	1.99e-05
Guttman_lincRNA_1716_._Ensembl_ENSMUSG00000074303	ENSMUSG00000042357	Gjb5	0.527287	2e-06	1.99e-05
Guttman_lincRNA_2280_._Necsulea_CUFF.231493	ENSMUSG00000021913	Ogdhl	0.527196	2e-06	1.99e-05
Guttman_lincRNA_2174	ENSMUSG00000078497	Gm13145	0.527104	2e-06	1.99e-05
Guttman_lincRNA_2280_._Necsulea_CUFF.231493	ENSMUSG00000040013	Fkbp6	0.527076	2e-06	1.99e-05
Guttman_lincRNA_2280_._Necsulea_CUFF.231493	ENSMUSG00000033826	Dnah8	0.527069	2e-06	1.99e-05
Guttman_lincRNA_1447	ENSMUSG00000006818	Sod2	0.526992	2e-06	1.99e-05
Guttman_lincRNA_542_._Ensembl_ENSMUSG00000084762_._Necsulea_ENSMUSG00000084762	ENSMUSG00000025726	Slc28a1	0.526913	2e-06	1.99e-05
Ensembl_ENSMUSG00000000031_._Ensembl_ENSMUSG00000099143_._Ensembl_ENSMUSG00000098816	ENSMUSG00000022218	Tgm1	-0.52689	2e-06	1.99e-05
Ensembl_ENSMUSG00000000031_._Ensembl_ENSMUSG00000099143_._Ensembl_ENSMUSG00000098816	ENSMUSG00000026193	Fn1	-0.526884	2e-06	1.99e-05
Ensembl_ENSMUSG00000000031_._Ensembl_ENSMUSG00000099143_._Ensembl_ENSMUSG00000098816	ENSMUSG00000025255	Zfhx4	0.526877	2e-06	1.99e-05
Ensembl_ENSMUSG00000000031_._Ensembl_ENSMUSG00000099143_._Ensembl_ENSMUSG00000098816	ENSMUSG00000052180	Serpinb6c	-0.526738	2e-06	1.99e-05
Ensembl_ENSMUSG00000000031_._Ensembl_ENSMUSG00000099143_._Ensembl_ENSMUSG00000098816	ENSMUSG00000029522	Pla2g1b	-0.526688	2e-06	1.99e-05
Ensembl_ENSMUSG00000000031_._Ensembl_ENSMUSG00000099143_._Ensembl_ENSMUSG00000098816	ENSMUSG00000056366	Fabp3-ps1	-0.526681	2e-06	1.99e-05
Necsulea_Locus_99471_._Guttman_lincRNA_674_._Ensembl_ENSMUSG00000097639	ENSMUSG00000027077	Smtnl1	0.526559	2e-06	1.99e-05
Guttman_lincRNA_516_._Ensembl_ENSMUSG00000086454_._Necsulea_ENSMUSG00000086454	ENSMUSG00000027210	Meis2	-0.526519	2e-06	1.99e-05
Ensembl_ENSMUSG00000000031_._Ensembl_ENSMUSG00000099143_._Ensembl_ENSMUSG00000098816	ENSMUSG00000043629	1700019D03Rik	-0.526478	2e-06	1.99e-05
Necsulea_Locus_99471_._Guttman_lincRNA_674_._Ensembl_ENSMUSG00000097639	ENSMUSG00000037860	Aim2	0.526428	2e-06	1.99e-05
Guttman_lincRNA_2551_._Ensembl_ENSMUSG00000078952	ENSMUSG00000021127	Zfp36l1	-0.526419	2e-06	1.99e-05
Guttman_lincRNA_516_._Ensembl_ENSMUSG00000086454_._Necsulea_ENSMUSG00000086454	Guttman_lincRNA_1716_._Ensembl_ENSMUSG00000074303		0.526338	2e-06	1.99e-05
Guttman_lincRNA_2174	ENSMUSG00000013236	Ptprs	-0.526304	2e-06	1.99e-05
Guttman_lincRNA_1447	ENSMUSG00000025056	Nr0b1	0.526275	2e-06	1.99e-05
Guttman_lincRNA_2280_._Necsulea_CUFF.231493	ENSMUSG00000024587	Nars	0.526258	2e-06	1.99e-05
Necsulea_Locus_99471_._Guttman_lincRNA_674_._Ensembl_ENSMUSG00000097639	ENSMUSG00000020089	Ppa1	0.526254	2e-06	1.99e-05
Guttman_lincRNA_2280_._Necsulea_CUFF.231493	ENSMUSG00000031960	Aars	0.52625	2e-06	1.99e-05
Guttman_lincRNA_516_._Ensembl_ENSMUSG00000086454_._Necsulea_ENSMUSG00000086454	ENSMUSG00000047146	Tet1	0.526179	2e-06	1.99e-05
Necsulea_Locus_99471_._Guttman_lincRNA_674_._Ensembl_ENSMUSG00000097639	ENSMUSG00000038515	Grtp1	0.526102	2e-06	1.99e-05
Guttman_lincRNA_2280_._Necsulea_CUFF.231493	ENSMUSG00000062929	Cfl2	-0.526	2e-06	1.99e-05
Guttman_lincRNA_2551_._Ensembl_ENSMUSG00000078952	ENSMUSG00000040669	Phc1	0.525924	2e-06	1.99e-05
Guttman_lincRNA_2280_._Necsulea_CUFF.231493	ENSMUSG00000026005	Rpe	0.525916	2e-06	1.99e-05
Ensembl_ENSMUSG00000000031_._Ensembl_ENSMUSG00000099143_._Ensembl_ENSMUSG00000098816	Guttman_lincRNA_2485		-0.525818	2e-06	1.99e-05
Guttman_lincRNA_516_._Ensembl_ENSMUSG00000086454_._Necsulea_ENSMUSG00000086454	ENSMUSG00000062908	Acadm	0.525717	2e-06	1.99e-05
Guttman_lincRNA_1447	ENSMUSG00000022272	Myo10	0.525445	2e-06	1.99e-05
Guttman_lincRNA_2551_._Ensembl_ENSMUSG00000078952	ENSMUSG00000039183	Nubp2	0.52538	2e-06	1.99e-05
Guttman_lincRNA_2174	ENSMUSG00000001604	Tcea3	0.525259	2e-06	1.99e-05
Guttman_lincRNA_516_._Ensembl_ENSMUSG00000086454_._Necsulea_ENSMUSG00000086454	ENSMUSG00000052957	Gas1	-0.52524	2e-06	1.99e-05
Guttman_lincRNA_2280_._Necsulea_CUFF.231493	ENSMUSG00000028093	Acp6	0.525209	2e-06	1.99e-05
Guttman_lincRNA_2551_._Ensembl_ENSMUSG00000078952	ENSMUSG00000040013	Fkbp6	0.525189	2e-06	1.99e-05
Guttman_lincRNA_2551_._Ensembl_ENSMUSG00000078952	ENSMUSG00000033983	Coil	0.52504	2e-06	1.99e-05
Guttman_lincRNA_1716_._Ensembl_ENSMUSG00000074303	ENSMUSG00000022304	Dpys	0.52503	2e-06	1.99e-05
Guttman_lincRNA_1447	Guttman_lincRNA_2280_._Necsulea_CUFF.231493		0.524939	2e-06	1.99e-05
Guttman_lincRNA_2280_._Necsulea_CUFF.231493	ENSMUSG00000026483	Fam129a	0.524714	2e-06	1.99e-05
Necsulea_Locus_22428_._Guttman_lincRNA_2851_._Necsulea_Locus_21016	ENSMUSG00000076441	Ass1	0.524556	2e-06	1.99e-05
Necsulea_Locus_22428_._Guttman_lincRNA_2851_._Necsulea_Locus_21016	ENSMUSG00000040785	Ttc3	-0.524553	2e-06	1.99e-05
Guttman_lincRNA_516_._Ensembl_ENSMUSG00000086454_._Necsulea_ENSMUSG00000086454	ENSMUSG00000010342	Tex14	0.524529	2e-06	1.99e-05
Guttman_lincRNA_2551_._Ensembl_ENSMUSG00000078952	ENSMUSG00000022849	Hspbap1	0.524522	2e-06	1.99e-05
Guttman_lincRNA_516_._Ensembl_ENSMUSG00000086454_._Necsulea_ENSMUSG00000086454	ENSMUSG00000017561	Crlf3	0.524406	2e-06	1.99e-05
Ensembl_ENSMUSG00000000031_._Ensembl_ENSMUSG00000099143_._Ensembl_ENSMUSG00000098816	ENSMUSG00000028773	Fabp3	-0.524357	2e-06	1.99e-05
Guttman_lincRNA_2485	ENSMUSG00000028109	Hormad1	0.524269	2e-06	1.99e-05
Guttman_lincRNA_2280_._Necsulea_CUFF.231493	ENSMUSG00000027010	Slc25a12	0.524124	2e-06	1.99e-05
Guttman_lincRNA_542_._Ensembl_ENSMUSG00000084762_._Necsulea_ENSMUSG00000084762	ENSMUSG00000032715	Trib3	0.524098	2e-06	1.99e-05
Necsulea_Locus_99471_._Guttman_lincRNA_674_._Ensembl_ENSMUSG00000097639	ENSMUSG00000074637	Sox2	0.523978	2e-06	1.99e-05
Guttman_lincRNA_2280_._Necsulea_CUFF.231493	ENSMUSG00000040651	D14Abb1e	0.523954	2e-06	1.99e-05
Guttman_lincRNA_1716_._Ensembl_ENSMUSG00000074303	ENSMUSG00000017453	Pipox	0.523894	2e-06	1.99e-05
Guttman_lincRNA_1716_._Ensembl_ENSMUSG00000074303	ENSMUSG00000037935	Smarce1	-0.523883	2e-06	1.99e-05
Ensembl_ENSMUSG00000000031_._Ensembl_ENSMUSG00000099143_._Ensembl_ENSMUSG00000098816	ENSMUSG00000009585	Apobec3	-0.52381	2e-06	1.99e-05
Guttman_lincRNA_2551_._Ensembl_ENSMUSG00000078952	ENSMUSG00000066456	Hmgn3	-0.523712	2e-06	1.99e-05
Ensembl_ENSMUSG00000000031_._Ensembl_ENSMUSG00000099143_._Ensembl_ENSMUSG00000098816	ENSMUSG00000001228	Uhrf1	-0.523648	2e-06	1.99e-05
Guttman_lincRNA_1716_._Ensembl_ENSMUSG00000074303	ENSMUSG00000025503	Taldo1	0.523629	2e-06	1.99e-05
Ensembl_ENSMUSG00000000031_._Ensembl_ENSMUSG00000099143_._Ensembl_ENSMUSG00000098816	ENSMUSG00000013089	Etv5	-0.523446	2e-06	1.99e-05
Guttman_lincRNA_2280_._Necsulea_CUFF.231493	ENSMUSG00000000942	Hoxa4	-0.523389	2e-06	1.99e-05
Guttman_lincRNA_2280_._Necsulea_CUFF.231493	ENSMUSG00000017548	Suz12	0.523353	2e-06	1.99e-05
Guttman_lincRNA_2174	ENSMUSG00000028691	Prdx1	0.523306	2e-06	1.99e-05
Guttman_lincRNA_516_._Ensembl_ENSMUSG00000086454_._Necsulea_ENSMUSG00000086454	ENSMUSG00000027010	Slc25a12	0.523265	2e-06	1.99e-05
Guttman_lincRNA_1447	ENSMUSG00000017861	Mybl2	0.523219	2e-06	1.99e-05
Guttman_lincRNA_516_._Ensembl_ENSMUSG00000086454_._Necsulea_ENSMUSG00000086454	ENSMUSG00000037935	Smarce1	-0.523186	2e-06	1.99e-05
Guttman_lincRNA_2485	ENSMUSG00000031584	Gsr	0.523021	2e-06	1.99e-05
Guttman_lincRNA_1716_._Ensembl_ENSMUSG00000074303	ENSMUSG00000022218	Tgm1	0.522997	2e-06	1.99e-05
Ensembl_ENSMUSG00000000031_._Ensembl_ENSMUSG00000099143_._Ensembl_ENSMUSG00000098816	ENSMUSG00000038515	Grtp1	-0.522935	2e-06	1.99e-05
Guttman_lincRNA_516_._Ensembl_ENSMUSG00000086454_._Necsulea_ENSMUSG00000086454	ENSMUSG00000020089	Ppa1	0.522911	2e-06	1.99e-05
Guttman_lincRNA_1716_._Ensembl_ENSMUSG00000074303	ENSMUSG00000038045	Sult6b1	0.522867	2e-06	1.99e-05
Guttman_lincRNA_2280_._Necsulea_CUFF.231493	ENSMUSG00000029313	Aff1	0.522784	2e-06	1.99e-05
Ensembl_ENSMUSG00000000031_._Ensembl_ENSMUSG00000099143_._Ensembl_ENSMUSG00000098816	ENSMUSG00000052957	Gas1	0.522689	2e-06	1.99e-05
Guttman_lincRNA_2485	ENSMUSG00000075394	Hoxc4	-0.522608	2e-06	1.99e-05
Ensembl_ENSMUSG00000000031_._Ensembl_ENSMUSG00000099143_._Ensembl_ENSMUSG00000098816	ENSMUSG00000048087	Gm4737	-0.522554	2e-06	1.99e-05
Ensembl_ENSMUSG00000056579_._Guttman_lincRNA_2207_._Ensembl_ENSMUSG00000099081_._Ensembl_ENSMUSG00000098265_._Ensembl_ENSMUSG00000098503_._Ensembl_ENSMUSG00000098948	ENSMUSG00000022682	Rrn3	-0.522524	2e-06	1.99e-05
Ensembl_ENSMUSG00000000031_._Ensembl_ENSMUSG00000099143_._Ensembl_ENSMUSG00000098816	ENSMUSG00000060572	Mfap2	0.522336	2e-06	1.99e-05
Guttman_lincRNA_1716_._Ensembl_ENSMUSG00000074303	ENSMUSG00000074637	Sox2	0.522277	2e-06	1.99e-05
Guttman_lincRNA_1716_._Ensembl_ENSMUSG00000074303	ENSMUSG00000022034	Esco2	0.522223	2e-06	1.99e-05
Guttman_lincRNA_1447	ENSMUSG00000022218	Tgm1	0.522145	2e-06	1.99e-05
Guttman_lincRNA_2280_._Necsulea_CUFF.231493	ENSMUSG00000013766	Ly6g6e	0.522122	2e-06	1.99e-05
Ensembl_ENSMUSG00000000031_._Ensembl_ENSMUSG00000099143_._Ensembl_ENSMUSG00000098816	ENSMUSG00000024725	Ostf1	-0.522104	2e-06	1.99e-05
Guttman_lincRNA_2551_._Ensembl_ENSMUSG00000078952	ENSMUSG00000029669	Tspan12	-0.521954	2e-06	1.99e-05
Ensembl_ENSMUSG00000092349	ENSMUSG00000020361	Hspa4	0.521901	2e-06	1.99e-05
Guttman_lincRNA_2280_._Necsulea_CUFF.231493	ENSMUSG00000032309	Fbxo22	0.521871	2e-06	1.99e-05
Ensembl_ENSMUSG00000092349	ENSMUSG00000030793	Pycard	0.521823	2e-06	1.99e-05
Guttman_lincRNA_2551_._Ensembl_ENSMUSG00000078952	ENSMUSG00000022816	Fstl1	-0.521786	2e-06	1.99e-05
Guttman_lincRNA_2280_._Necsulea_CUFF.231493	ENSMUSG00000020649	Rrm2	0.521762	2e-06	1.99e-05
Guttman_lincRNA_2454	ENSMUSG00000023150	Ivns1abp	-0.521753	2e-06	1.99e-05
Guttman_lincRNA_2551_._Ensembl_ENSMUSG00000078952	ENSMUSG00000044447	Dock5	0.521644	2e-06	1.99e-05
Guttman_lincRNA_2454	ENSMUSG00000048087	Gm4737	0.521434	2e-06	1.99e-05
Guttman_lincRNA_2280_._Necsulea_CUFF.231493	ENSMUSG00000046449	C77370	0.521427	2e-06	1.99e-05
Ensembl_ENSMUSG00000000031_._Ensembl_ENSMUSG00000099143_._Ensembl_ENSMUSG00000098816	ENSMUSG00000037664	Cdkn1c	0.521395	2e-06	1.99e-05
Guttman_lincRNA_1447	ENSMUSG00000020424	Gatsl3	0.521365	2e-06	1.99e-05
Ensembl_ENSMUSG00000092349	ENSMUSG00000092335	Gm7221	0.521306	2e-06	1.99e-05
Guttman_lincRNA_1447	ENSMUSG00000030722	Nfatc2ip	0.521156	2e-06	1.99e-05
Necsulea_Locus_22428_._Guttman_lincRNA_2851_._Necsulea_Locus_21016	ENSMUSG00000067860	Zic3	0.521134	2e-06	1.99e-05
Necsulea_Locus_99471_._Guttman_lincRNA_674_._Ensembl_ENSMUSG00000097639	ENSMUSG00000025151	Maged1	-0.521027	2e-06	1.99e-05
Guttman_lincRNA_2551_._Ensembl_ENSMUSG00000078952	ENSMUSG00000032267	Usp28	0.521003	2e-06	1.99e-05
Guttman_lincRNA_542_._Ensembl_ENSMUSG00000084762_._Necsulea_ENSMUSG00000084762	ENSMUSG00000025364	Pa2g4	0.521	2e-06	1.99e-05
Guttman_lincRNA_1716_._Ensembl_ENSMUSG00000074303	ENSMUSG00000078495	Gm13157	0.520925	2e-06	1.99e-05
Guttman_lincRNA_2551_._Ensembl_ENSMUSG00000078952	ENSMUSG00000036743	Psma8	0.520865	2e-06	1.99e-05
Guttman_lincRNA_516_._Ensembl_ENSMUSG00000086454_._Necsulea_ENSMUSG00000086454	ENSMUSG00000028528	Dnajc6	0.52085	2e-06	1.99e-05
Guttman_lincRNA_2280_._Necsulea_CUFF.231493	ENSMUSG00000028528	Dnajc6	0.520806	2e-06	1.99e-05
Guttman_lincRNA_2485	ENSMUSG00000017548	Suz12	0.52068	2e-06	1.99e-05
Guttman_lincRNA_2280_._Necsulea_CUFF.231493	ENSMUSG00000030041	M1ap	0.520637	2e-06	1.99e-05
Ensembl_ENSMUSG00000000031_._Ensembl_ENSMUSG00000099143_._Ensembl_ENSMUSG00000098816	ENSMUSG00000026202	Tuba4a	-0.520603	2e-06	1.99e-05
Guttman_lincRNA_2551_._Ensembl_ENSMUSG00000078952	ENSMUSG00000002265	Peg3	-0.520569	2e-06	1.99e-05
Guttman_lincRNA_516_._Ensembl_ENSMUSG00000086454_._Necsulea_ENSMUSG00000086454	ENSMUSG00000024039	Cbs	0.520549	2e-06	1.99e-05
Guttman_lincRNA_2551_._Ensembl_ENSMUSG00000078952	ENSMUSG00000028378	Ptgr1	0.520435	2e-06	1.99e-05
Guttman_lincRNA_2280_._Necsulea_CUFF.231493	ENSMUSG00000037405	Icam1	0.520367	2e-06	1.99e-05
Guttman_lincRNA_516_._Ensembl_ENSMUSG00000086454_._Necsulea_ENSMUSG00000086454	ENSMUSG00000001918	Slc1a5	0.520313	2e-06	1.99e-05
Guttman_lincRNA_2551_._Ensembl_ENSMUSG00000078952	ENSMUSG00000002845	Tmem39a	0.520304	2e-06	1.99e-05
Guttman_lincRNA_2551_._Ensembl_ENSMUSG00000078952	ENSMUSG00000026687	Aldh9a1	0.520295	2e-06	1.99e-05
Ensembl_ENSMUSG00000000031_._Ensembl_ENSMUSG00000099143_._Ensembl_ENSMUSG00000098816	ENSMUSG00000040785	Ttc3	0.520176	2e-06	1.99e-05
Guttman_lincRNA_1716_._Ensembl_ENSMUSG00000074303	ENSMUSG00000028807	Zbtb8a	0.52001	2e-06	1.99e-05
Guttman_lincRNA_516_._Ensembl_ENSMUSG00000086454_._Necsulea_ENSMUSG00000086454	ENSMUSG00000060572	Mfap2	-0.51996	2e-06	1.99e-05
Ensembl_ENSMUSG00000000031_._Ensembl_ENSMUSG00000099143_._Ensembl_ENSMUSG00000098816	ENSMUSG00000031403	Dkc1	-0.519893	2e-06	1.99e-05
Guttman_lincRNA_2280_._Necsulea_CUFF.231493	ENSMUSG00000017561	Crlf3	0.51989	2e-06	1.99e-05
Guttman_lincRNA_2280_._Necsulea_CUFF.231493	Guttman_lincRNA_2174		0.519854	2e-06	1.99e-05
Guttman_lincRNA_2280_._Necsulea_CUFF.231493	ENSMUSG00000006056	Calcoco2	0.519822	2e-06	1.99e-05
Guttman_lincRNA_2280_._Necsulea_CUFF.231493	ENSMUSG00000032715	Trib3	0.519769	2e-06	1.99e-05
Necsulea_Locus_22428_._Guttman_lincRNA_2851_._Necsulea_Locus_21016	ENSMUSG00000079225	Gm9531	0.519744	2e-06	1.99e-05
Guttman_lincRNA_1447	ENSMUSG00000036743	Psma8	0.519715	2e-06	1.99e-05
Necsulea_Locus_22428_._Guttman_lincRNA_2851_._Necsulea_Locus_21016	ENSMUSG00000078496	Gm13152	0.519714	2e-06	1.99e-05
Guttman_lincRNA_1447	Necsulea_Locus_99471_._Guttman_lincRNA_674_._Ensembl_ENSMUSG00000097639		0.519645	2e-06	1.99e-05
Guttman_lincRNA_1447	Guttman_lincRNA_2174		0.519591	2e-06	1.99e-05
Guttman_lincRNA_1716_._Ensembl_ENSMUSG00000074303	ENSMUSG00000072419	Dppa2	0.519562	2e-06	1.99e-05
Guttman_lincRNA_2280_._Necsulea_CUFF.231493	ENSMUSG00000001918	Slc1a5	0.51956	2e-06	1.99e-05
Guttman_lincRNA_542_._Ensembl_ENSMUSG00000084762_._Necsulea_ENSMUSG00000084762	ENSMUSG00000028093	Acp6	0.519513	2e-06	1.99e-05
Ensembl_ENSMUSG00000000031_._Ensembl_ENSMUSG00000099143_._Ensembl_ENSMUSG00000098816	Guttman_lincRNA_2551_._Ensembl_ENSMUSG00000078952		-0.519483	2e-06	1.99e-05
Guttman_lincRNA_1716_._Ensembl_ENSMUSG00000074303	ENSMUSG00000013236	Ptprs	-0.519456	2e-06	1.99e-05
Ensembl_ENSMUSG00000000031_._Ensembl_ENSMUSG00000099143_._Ensembl_ENSMUSG00000098816	ENSMUSG00000087207	Gm13147	-0.519412	2e-06	1.99e-05
Necsulea_Locus_99471_._Guttman_lincRNA_674_._Ensembl_ENSMUSG00000097639	ENSMUSG00000062929	Cfl2	-0.519159	2e-06	1.99e-05
Guttman_lincRNA_1447	ENSMUSG00000058571	Gpc6	-0.519103	2e-06	1.99e-05
Guttman_lincRNA_2485	ENSMUSG00000043535	Setx	0.519062	2e-06	1.99e-05
Guttman_lincRNA_2485	ENSMUSG00000018239	Zcchc10	0.519054	2e-06	1.99e-05
Ensembl_ENSMUSG00000000031_._Ensembl_ENSMUSG00000099143_._Ensembl_ENSMUSG00000098816	ENSMUSG00000028766	Alpl	-0.519044	2e-06	1.99e-05
Guttman_lincRNA_516_._Ensembl_ENSMUSG00000086454_._Necsulea_ENSMUSG00000086454	ENSMUSG00000068245	Phf11d	0.519	2e-06	1.99e-05
Guttman_lincRNA_2280_._Necsulea_CUFF.231493	ENSMUSG00000052713	Zfp608	-0.518851	2e-06	1.99e-05
Guttman_lincRNA_2454	ENSMUSG00000028640	Tfap2c	0.51884	2e-06	1.99e-05
Ensembl_ENSMUSG00000000031_._Ensembl_ENSMUSG00000099143_._Ensembl_ENSMUSG00000098816	ENSMUSG00000024900	Cpt1a	-0.518827	2e-06	1.99e-05
Necsulea_Locus_22428_._Guttman_lincRNA_2851_._Necsulea_Locus_21016	ENSMUSG00000038045	Sult6b1	0.5187	2e-06	1.99e-05
Ensembl_ENSMUSG00000000031_._Ensembl_ENSMUSG00000099143_._Ensembl_ENSMUSG00000098816	ENSMUSG00000030672	Mylpf	-0.518521	2e-06	1.99e-05
Guttman_lincRNA_516_._Ensembl_ENSMUSG00000086454_._Necsulea_ENSMUSG00000086454	ENSMUSG00000024030	Abcg1	0.518416	2e-06	1.99e-05
Guttman_lincRNA_516_._Ensembl_ENSMUSG00000086454_._Necsulea_ENSMUSG00000086454	ENSMUSG00000015112	Slc25a13	0.518187	2e-06	1.99e-05
Guttman_lincRNA_2280_._Necsulea_CUFF.231493	ENSMUSG00000023150	Ivns1abp	-0.51814	2e-06	1.99e-05
Guttman_lincRNA_1447	ENSMUSG00000007379	Dennd2c	0.518124	2e-06	1.99e-05
Guttman_lincRNA_1447	ENSMUSG00000031139	Mcf2	0.51812	2e-06	1.99e-05
Ensembl_ENSMUSG00000000031_._Ensembl_ENSMUSG00000099143_._Ensembl_ENSMUSG00000098816	ENSMUSG00000031651	Triml1	-0.518105	2e-06	1.99e-05
Guttman_lincRNA_1716_._Ensembl_ENSMUSG00000074303	ENSMUSG00000040785	Ttc3	-0.518099	2e-06	1.99e-05
Guttman_lincRNA_1716_._Ensembl_ENSMUSG00000074303	ENSMUSG00000046000	Naa11	0.518095	2e-06	1.99e-05
Guttman_lincRNA_2551_._Ensembl_ENSMUSG00000078952	ENSMUSG00000031246	Sh3bgrl	-0.518016	2e-06	1.99e-05
Guttman_lincRNA_2551_._Ensembl_ENSMUSG00000078952	ENSMUSG00000025423	Pias2	0.517892	2e-06	1.99e-05
Guttman_lincRNA_2454	ENSMUSG00000040651	D14Abb1e	0.51766	2e-06	1.99e-05
Guttman_lincRNA_2551_._Ensembl_ENSMUSG00000078952	ENSMUSG00000030060	Hmces	0.517642	2e-06	1.99e-05
Guttman_lincRNA_2551_._Ensembl_ENSMUSG00000078952	ENSMUSG00000048376	F2r	-0.517636	2e-06	1.99e-05
Guttman_lincRNA_1447	ENSMUSG00000079471	Gm7325	0.517589	2e-06	1.99e-05
Necsulea_Locus_22428_._Guttman_lincRNA_2851_._Necsulea_Locus_21016	ENSMUSG00000022682	Rrn3	0.517509	2e-06	1.99e-05
Guttman_lincRNA_1447	ENSMUSG00000038172	Ttc39b	0.517319	2e-06	1.99e-05
Guttman_lincRNA_1447	ENSMUSG00000020899	Pfas	0.517234	2e-06	1.99e-05
Guttman_lincRNA_1716_._Ensembl_ENSMUSG00000074303	ENSMUSG00000074887	EU599041	0.517203	2e-06	1.99e-05
Guttman_lincRNA_2551_._Ensembl_ENSMUSG00000078952	ENSMUSG00000030717	Nupr1	0.517195	2e-06	1.99e-05
Guttman_lincRNA_2280_._Necsulea_CUFF.231493	ENSMUSG00000024206	Rfx2	0.517189	2e-06	1.99e-05
Necsulea_Locus_22428_._Guttman_lincRNA_2851_._Necsulea_Locus_21016	ENSMUSG00000020424	Gatsl3	0.517173	2e-06	1.99e-05
Guttman_lincRNA_516_._Ensembl_ENSMUSG00000086454_._Necsulea_ENSMUSG00000086454	Necsulea_Locus_27300_._Guttman_lincRNA_3508		0.517132	2e-06	1.99e-05
Guttman_lincRNA_542_._Ensembl_ENSMUSG00000084762_._Necsulea_ENSMUSG00000084762	ENSMUSG00000046337	Fam178b	0.517101	2e-06	1.99e-05
Guttman_lincRNA_1716_._Ensembl_ENSMUSG00000074303	ENSMUSG00000039145	Camk1d	0.516987	2e-06	1.99e-05
Necsulea_Locus_99471_._Guttman_lincRNA_674_._Ensembl_ENSMUSG00000097639	ENSMUSG00000022114	Spry2	0.516865	2e-06	1.99e-05
Ensembl_ENSMUSG00000000031_._Ensembl_ENSMUSG00000099143_._Ensembl_ENSMUSG00000098816	ENSMUSG00000039329	Tex19.1	-0.516738	2e-06	1.99e-05
Guttman_lincRNA_516_._Ensembl_ENSMUSG00000086454_._Necsulea_ENSMUSG00000086454	ENSMUSG00000040785	Ttc3	-0.516682	2e-06	1.99e-05
Guttman_lincRNA_2454	ENSMUSG00000034203	Chchd4	0.516623	2e-06	1.99e-05
Guttman_lincRNA_516_._Ensembl_ENSMUSG00000086454_._Necsulea_ENSMUSG00000086454	ENSMUSG00000033306	Lpp	-0.516568	2e-06	1.99e-05
Guttman_lincRNA_1716_._Ensembl_ENSMUSG00000074303	ENSMUSG00000020424	Gatsl3	0.516462	2e-06	1.99e-05
Necsulea_Locus_22428_._Guttman_lincRNA_2851_._Necsulea_Locus_21016	ENSMUSG00000013236	Ptprs	-0.516373	2e-06	1.99e-05
Guttman_lincRNA_1447	ENSMUSG00000072419	Dppa2	0.516244	2e-06	1.99e-05
Guttman_lincRNA_1447	ENSMUSG00000032999	Nlrp4f	0.51615	2e-06	1.99e-05
Guttman_lincRNA_542_._Ensembl_ENSMUSG00000084762_._Necsulea_ENSMUSG00000084762	ENSMUSG00000024180	Tmem8	0.516143	2e-06	1.99e-05
Ensembl_ENSMUSG00000000031_._Ensembl_ENSMUSG00000099143_._Ensembl_ENSMUSG00000098816	ENSMUSG00000026917	Wdr5	-0.516067	2e-06	1.99e-05
Guttman_lincRNA_2280_._Necsulea_CUFF.231493	ENSMUSG00000018239	Zcchc10	0.516058	2e-06	1.99e-05
Guttman_lincRNA_2485	ENSMUSG00000029007	Agtrap	0.515984	2e-06	1.99e-05
Guttman_lincRNA_1716_._Ensembl_ENSMUSG00000074303	ENSMUSG00000002847	Pla1a	0.515982	2e-06	1.99e-05
Necsulea_Locus_22428_._Guttman_lincRNA_2851_._Necsulea_Locus_21016	ENSMUSG00000029249	Rest	0.515974	2e-06	1.99e-05
Ensembl_ENSMUSG00000000031_._Ensembl_ENSMUSG00000099143_._Ensembl_ENSMUSG00000098816	ENSMUSG00000015354	Pcolce2	-0.51595	2e-06	1.99e-05
Guttman_lincRNA_2174	ENSMUSG00000028807	Zbtb8a	0.515908	2e-06	1.99e-05
Guttman_lincRNA_1716_._Ensembl_ENSMUSG00000074303	ENSMUSG00000035235	Trim13	0.515872	2e-06	1.99e-05
Ensembl_ENSMUSG00000092349	ENSMUSG00000026192	Atic	0.515722	2e-06	1.99e-05
Ensembl_ENSMUSG00000000031_._Ensembl_ENSMUSG00000099143_._Ensembl_ENSMUSG00000098816	ENSMUSG00000030722	Nfatc2ip	-0.51559	2e-06	1.99e-05
Guttman_lincRNA_2174	ENSMUSG00000066007	Zfp600	0.515523	2e-06	1.99e-05
Ensembl_ENSMUSG00000000031_._Ensembl_ENSMUSG00000099143_._Ensembl_ENSMUSG00000098816	ENSMUSG00000028179	Cth	-0.515503	2e-06	1.99e-05
Guttman_lincRNA_2454	ENSMUSG00000057561	Eif1a	0.515498	2e-06	1.99e-05
Guttman_lincRNA_1716_._Ensembl_ENSMUSG00000074303	ENSMUSG00000020899	Pfas	0.515358	2e-06	1.99e-05
Necsulea_Locus_99471_._Guttman_lincRNA_674_._Ensembl_ENSMUSG00000097639	ENSMUSG00000061062	Gm10093	0.515305	2e-06	1.99e-05
Guttman_lincRNA_1716_._Ensembl_ENSMUSG00000074303	ENSMUSG00000062929	Cfl2	-0.51529	2e-06	1.99e-05
Guttman_lincRNA_516_._Ensembl_ENSMUSG00000086454_._Necsulea_ENSMUSG00000086454	ENSMUSG00000053654	Krt42	0.51521	2e-06	1.99e-05
Guttman_lincRNA_2485	ENSMUSG00000037935	Smarce1	-0.5152	2e-06	1.99e-05
Guttman_lincRNA_2174	ENSMUSG00000022682	Rrn3	0.515126	2e-06	1.99e-05
Guttman_lincRNA_516_._Ensembl_ENSMUSG00000086454_._Necsulea_ENSMUSG00000086454	ENSMUSG00000047139	Cd24a	-0.514965	2e-06	1.99e-05
Ensembl_ENSMUSG00000000031_._Ensembl_ENSMUSG00000099143_._Ensembl_ENSMUSG00000098816	ENSMUSG00000036202	Rif1	-0.514909	2e-06	1.99e-05
Ensembl_ENSMUSG00000000031_._Ensembl_ENSMUSG00000099143_._Ensembl_ENSMUSG00000098816	ENSMUSG00000061062	Gm10093	-0.514895	2e-06	1.99e-05
Guttman_lincRNA_2551_._Ensembl_ENSMUSG00000078952	ENSMUSG00000046000	Naa11	0.514659	2e-06	1.99e-05
Guttman_lincRNA_2280_._Necsulea_CUFF.231493	ENSMUSG00000022114	Spry2	0.514637	2e-06	1.99e-05
Guttman_lincRNA_2280_._Necsulea_CUFF.231493	ENSMUSG00000038700	Hoxb5	-0.514584	2e-06	1.99e-05
Ensembl_ENSMUSG00000000031_._Ensembl_ENSMUSG00000099143_._Ensembl_ENSMUSG00000098816	ENSMUSG00000025503	Taldo1	-0.514569	2e-06	1.99e-05
Ensembl_ENSMUSG00000000031_._Ensembl_ENSMUSG00000099143_._Ensembl_ENSMUSG00000098816	ENSMUSG00000020717	Pecam1	-0.514546	2e-06	1.99e-05
Guttman_lincRNA_2280_._Necsulea_CUFF.231493	ENSMUSG00000034832	Tet3	-0.514398	2e-06	1.99e-05
Ensembl_ENSMUSG00000000031_._Ensembl_ENSMUSG00000099143_._Ensembl_ENSMUSG00000098816	ENSMUSG00000036030	Prtg	0.514364	2e-06	1.99e-05
Guttman_lincRNA_2280_._Necsulea_CUFF.231493	ENSMUSG00000090744	Gm6871	0.514237	2e-06	1.99e-05
Guttman_lincRNA_2174	ENSMUSG00000016319	Slc25a5	0.514218	2e-06	1.99e-05
Guttman_lincRNA_1716_._Ensembl_ENSMUSG00000074303	ENSMUSG00000034714	Ttyh2	0.514189	2e-06	1.99e-05
Guttman_lincRNA_516_._Ensembl_ENSMUSG00000086454_._Necsulea_ENSMUSG00000086454	ENSMUSG00000026005	Rpe	0.51417	2e-06	1.99e-05
Guttman_lincRNA_2280_._Necsulea_CUFF.231493	ENSMUSG00000004880	Lbr	0.514162	2e-06	1.99e-05
Ensembl_ENSMUSG00000000031_._Ensembl_ENSMUSG00000099143_._Ensembl_ENSMUSG00000098816	ENSMUSG00000095834	Tdgf1-ps1	-0.514119	2e-06	1.99e-05
Guttman_lincRNA_1716_._Ensembl_ENSMUSG00000074303	ENSMUSG00000018411	Mapt	0.514098	2e-06	1.99e-05
Guttman_lincRNA_542_._Ensembl_ENSMUSG00000084762_._Necsulea_ENSMUSG00000084762	ENSMUSG00000041548	Hspb8	0.513946	2e-06	1.99e-05
Guttman_lincRNA_2280_._Necsulea_CUFF.231493	ENSMUSG00000034203	Chchd4	0.513924	2e-06	1.99e-05
Guttman_lincRNA_2551_._Ensembl_ENSMUSG00000078952	ENSMUSG00000042207	Kdm5b	0.51385	2e-06	1.99e-05
Guttman_lincRNA_2485	ENSMUSG00000037188	Grhl3	0.5137	2e-06	1.99e-05
Guttman_lincRNA_2551_._Ensembl_ENSMUSG00000078952	ENSMUSG00000018377	Vezf1	-0.513606	2e-06	1.99e-05
Guttman_lincRNA_2551_._Ensembl_ENSMUSG00000078952	Guttman_lincRNA_1394_._Necsulea_Locus_93819_._Necsulea_Locus_92889_._Guttman_lincRNA_1395_._Necsulea_Locus_92697		0.513589	2e-06	1.99e-05
Guttman_lincRNA_1716_._Ensembl_ENSMUSG00000074303	ENSMUSG00000051316	Taf7	0.513543	2e-06	1.99e-05
Guttman_lincRNA_1716_._Ensembl_ENSMUSG00000074303	ENSMUSG00000031379	Pir	0.513471	2e-06	1.99e-05
Necsulea_Locus_99471_._Guttman_lincRNA_674_._Ensembl_ENSMUSG00000097639	ENSMUSG00000028109	Hormad1	0.513446	2e-06	1.99e-05
Guttman_lincRNA_2551_._Ensembl_ENSMUSG00000078952	ENSMUSG00000031538	Plat	-0.513424	2e-06	1.99e-05
Guttman_lincRNA_542_._Ensembl_ENSMUSG00000084762_._Necsulea_ENSMUSG00000084762	ENSMUSG00000048087	Gm4737	0.51321	2e-06	1.99e-05
Guttman_lincRNA_2280_._Necsulea_CUFF.231493	ENSMUSG00000091594	Gm17067	0.513152	2e-06	1.99e-05
Guttman_lincRNA_2551_._Ensembl_ENSMUSG00000078952	ENSMUSG00000015112	Slc25a13	0.51304	2e-06	1.99e-05
Guttman_lincRNA_516_._Ensembl_ENSMUSG00000086454_._Necsulea_ENSMUSG00000086454	ENSMUSG00000032366	Tpm1	-0.513038	2e-06	1.99e-05
Guttman_lincRNA_2454	ENSMUSG00000055401	Fbxo6	0.513007	2e-06	1.99e-05
Guttman_lincRNA_2551_._Ensembl_ENSMUSG00000078952	ENSMUSG00000033306	Lpp	-0.512999	2e-06	1.99e-05
Guttman_lincRNA_516_._Ensembl_ENSMUSG00000086454_._Necsulea_ENSMUSG00000086454	ENSMUSG00000029844	Hoxa1	-0.512945	2e-06	1.99e-05
Guttman_lincRNA_516_._Ensembl_ENSMUSG00000086454_._Necsulea_ENSMUSG00000086454	ENSMUSG00000051316	Taf7	0.512903	2e-06	1.99e-05
Guttman_lincRNA_1716_._Ensembl_ENSMUSG00000074303	ENSMUSG00000022241	Tars	0.512782	2e-06	1.99e-05
Guttman_lincRNA_542_._Ensembl_ENSMUSG00000084762_._Necsulea_ENSMUSG00000084762	ENSMUSG00000021748	Pdhb	0.512767	2e-06	1.99e-05
Guttman_lincRNA_2551_._Ensembl_ENSMUSG00000078952	ENSMUSG00000021048	Mthfd1	0.512716	2e-06	1.99e-05
Ensembl_ENSMUSG00000092349	ENSMUSG00000064370	mt-Cytb	0.51256	2e-06	1.99e-05
Guttman_lincRNA_1447	ENSMUSG00000067860	Zic3	0.512524	2e-06	1.99e-05
Guttman_lincRNA_2485	ENSMUSG00000010342	Tex14	0.512351	2e-06	1.99e-05
Guttman_lincRNA_516_._Ensembl_ENSMUSG00000086454_._Necsulea_ENSMUSG00000086454	ENSMUSG00000001542	Ell2	0.512329	2e-06	1.99e-05
Guttman_lincRNA_1447	ENSMUSG00000074887	EU599041	0.512283	2e-06	1.99e-05
Necsulea_Locus_22428_._Guttman_lincRNA_2851_._Necsulea_Locus_21016	ENSMUSG00000054766	Set	0.512217	2e-06	1.99e-05
Guttman_lincRNA_542_._Ensembl_ENSMUSG00000084762_._Necsulea_ENSMUSG00000084762	Guttman_lincRNA_1394_._Necsulea_Locus_93819_._Necsulea_Locus_92889_._Guttman_lincRNA_1395_._Necsulea_Locus_92697		0.51221	2e-06	1.99e-05
Guttman_lincRNA_1716_._Ensembl_ENSMUSG00000074303	ENSMUSG00000038253	Hoxa5	-0.5122	2e-06	1.99e-05
Guttman_lincRNA_2485	ENSMUSG00000003235	Eif2b5	0.512171	2e-06	1.99e-05
Guttman_lincRNA_516_._Ensembl_ENSMUSG00000086454_._Necsulea_ENSMUSG00000086454	ENSMUSG00000035186	Ubd	0.512127	2e-06	1.99e-05
Guttman_lincRNA_1716_._Ensembl_ENSMUSG00000074303	ENSMUSG00000022114	Spry2	0.512105	2e-06	1.99e-05
Guttman_lincRNA_516_._Ensembl_ENSMUSG00000086454_._Necsulea_ENSMUSG00000086454	ENSMUSG00000041548	Hspb8	0.511989	2e-06	1.99e-05
Guttman_lincRNA_2551_._Ensembl_ENSMUSG00000078952	ENSMUSG00000022962	Gart	0.511876	2e-06	1.99e-05
Guttman_lincRNA_2280_._Necsulea_CUFF.231493	ENSMUSG00000094942	Gm3604	0.511861	2e-06	1.99e-05
Ensembl_ENSMUSG00000000031_._Ensembl_ENSMUSG00000099143_._Ensembl_ENSMUSG00000098816	ENSMUSG00000033983	Coil	-0.511823	2e-06	1.99e-05
Ensembl_ENSMUSG00000000031_._Ensembl_ENSMUSG00000099143_._Ensembl_ENSMUSG00000098816	ENSMUSG00000042808	Gpx2	-0.511739	2e-06	1.99e-05
Guttman_lincRNA_1716_._Ensembl_ENSMUSG00000074303	ENSMUSG00000075394	Hoxc4	-0.511718	2e-06	1.99e-05
Guttman_lincRNA_2280_._Necsulea_CUFF.231493	ENSMUSG00000005410	Mcm5	0.51163	2e-06	1.99e-05
Guttman_lincRNA_1716_._Ensembl_ENSMUSG00000074303	ENSMUSG00000031403	Dkc1	0.511621	2e-06	1.99e-05
Necsulea_Locus_99471_._Guttman_lincRNA_674_._Ensembl_ENSMUSG00000097639	ENSMUSG00000004187	Kifc2	0.511402	2e-06	1.99e-05
Necsulea_Locus_22428_._Guttman_lincRNA_2851_._Necsulea_Locus_21016	ENSMUSG00000027077	Smtnl1	0.511365	2e-06	1.99e-05
Guttman_lincRNA_1447	ENSMUSG00000032397	Tipin	0.511362	2e-06	1.99e-05
Guttman_lincRNA_2551_._Ensembl_ENSMUSG00000078952	ENSMUSG00000020534	Shmt1	0.511312	2e-06	1.99e-05
Guttman_lincRNA_1716_._Ensembl_ENSMUSG00000074303	ENSMUSG00000018377	Vezf1	-0.511189	2e-06	1.99e-05
Guttman_lincRNA_2454	ENSMUSG00000015112	Slc25a13	0.511123	2e-06	1.99e-05
Guttman_lincRNA_542_._Ensembl_ENSMUSG00000084762_._Necsulea_ENSMUSG00000084762	ENSMUSG00000005566	Trim28	0.511105	2e-06	1.99e-05
Ensembl_ENSMUSG00000092349	ENSMUSG00000028109	Hormad1	0.510956	2e-06	1.99e-05
Guttman_lincRNA_1716_._Ensembl_ENSMUSG00000074303	ENSMUSG00000055148	Klf2	0.510894	2e-06	1.99e-05
Ensembl_ENSMUSG00000000031_._Ensembl_ENSMUSG00000099143_._Ensembl_ENSMUSG00000098816	ENSMUSG00000074867	Zfp808	-0.510871	2e-06	1.99e-05
Guttman_lincRNA_1447	ENSMUSG00000027702	Lrrc34	0.510769	2e-06	1.99e-05
Guttman_lincRNA_2485	ENSMUSG00000092335	Gm7221	0.510758	2e-06	1.99e-05
Guttman_lincRNA_1447	ENSMUSG00000042357	Gjb5	0.510723	2e-06	1.99e-05
Guttman_lincRNA_2551_._Ensembl_ENSMUSG00000078952	ENSMUSG00000046337	Fam178b	0.510666	2e-06	1.99e-05
Guttman_lincRNA_1447	ENSMUSG00000055653	Gpc3	-0.510656	2e-06	1.99e-05
Guttman_lincRNA_2454	ENSMUSG00000005566	Trim28	0.510619	2e-06	1.99e-05
Necsulea_Locus_22428_._Guttman_lincRNA_2851_._Necsulea_Locus_21016	ENSMUSG00000044626	Liph	0.510533	2e-06	1.99e-05
Guttman_lincRNA_1447	ENSMUSG00000079560	Hoxa3	-0.510499	2e-06	1.99e-05
Necsulea_Locus_99471_._Guttman_lincRNA_674_._Ensembl_ENSMUSG00000097639	ENSMUSG00000042751	Nmnat2	0.510424	2e-06	1.99e-05
Guttman_lincRNA_2551_._Ensembl_ENSMUSG00000078952	ENSMUSG00000014245	Pigl	0.510391	2e-06	1.99e-05
Guttman_lincRNA_1716_._Ensembl_ENSMUSG00000074303	ENSMUSG00000024587	Nars	0.510381	2e-06	1.99e-05
Guttman_lincRNA_542_._Ensembl_ENSMUSG00000084762_._Necsulea_ENSMUSG00000084762	ENSMUSG00000020089	Ppa1	0.510289	2e-06	1.99e-05
Guttman_lincRNA_2280_._Necsulea_CUFF.231493	ENSMUSG00000026893	Gca	0.510245	2e-06	1.99e-05
Guttman_lincRNA_516_._Ensembl_ENSMUSG00000086454_._Necsulea_ENSMUSG00000086454	ENSMUSG00000052102	Gnpda1	0.50992	2e-06	1.99e-05
Necsulea_Locus_22428_._Guttman_lincRNA_2851_._Necsulea_Locus_21016	ENSMUSG00000028773	Fabp3	0.509905	2e-06	1.99e-05
Guttman_lincRNA_1716_._Ensembl_ENSMUSG00000074303	ENSMUSG00000025630	Hprt	0.509851	2e-06	1.99e-05
Guttman_lincRNA_2174	ENSMUSG00000074887	EU599041	0.509826	2e-06	1.99e-05
Necsulea_Locus_22428_._Guttman_lincRNA_2851_._Necsulea_Locus_21016	ENSMUSG00000027239	Mdk	-0.509824	2e-06	1.99e-05
Ensembl_ENSMUSG00000000031_._Ensembl_ENSMUSG00000099143_._Ensembl_ENSMUSG00000098816	ENSMUSG00000022849	Hspbap1	-0.509817	2e-06	1.99e-05
Guttman_lincRNA_516_._Ensembl_ENSMUSG00000086454_._Necsulea_ENSMUSG00000086454	Necsulea_Locus_22428_._Guttman_lincRNA_2851_._Necsulea_Locus_21016		0.509802	2e-06	1.99e-05
Guttman_lincRNA_2454	ENSMUSG00000037722	Gnpnat1	0.509794	2e-06	1.99e-05
Ensembl_ENSMUSG00000092349	ENSMUSG00000061062	Gm10093	0.509784	2e-06	1.99e-05
Guttman_lincRNA_516_._Ensembl_ENSMUSG00000086454_._Necsulea_ENSMUSG00000086454	ENSMUSG00000028358	Zfp618	-0.509727	2e-06	1.99e-05
Guttman_lincRNA_2454	ENSMUSG00000032715	Trib3	0.509725	2e-06	1.99e-05
Guttman_lincRNA_2551_._Ensembl_ENSMUSG00000078952	ENSMUSG00000025357	Dgka	0.509693	2e-06	1.99e-05
Guttman_lincRNA_1447	ENSMUSG00000047751	Utf1	0.509633	2e-06	1.99e-05
Guttman_lincRNA_516_._Ensembl_ENSMUSG00000086454_._Necsulea_ENSMUSG00000086454	ENSMUSG00000020674	Pxdn	-0.509624	2e-06	1.99e-05
Guttman_lincRNA_516_._Ensembl_ENSMUSG00000086454_._Necsulea_ENSMUSG00000086454	ENSMUSG00000024594	Prrc1	0.509574	2e-06	1.99e-05
Necsulea_Locus_99471_._Guttman_lincRNA_674_._Ensembl_ENSMUSG00000097639	ENSMUSG00000039682	Lap3	0.509499	2e-06	1.99e-05
Guttman_lincRNA_2454	ENSMUSG00000044224	Dnajc21	0.509488	2e-06	1.99e-05
Guttman_lincRNA_2174	ENSMUSG00000036202	Rif1	0.509475	2e-06	1.99e-05
Ensembl_ENSMUSG00000000031_._Ensembl_ENSMUSG00000099143_._Ensembl_ENSMUSG00000098816	Guttman_lincRNA_542_._Ensembl_ENSMUSG00000084762_._Necsulea_ENSMUSG00000084762		-0.509447	2e-06	1.99e-05
Guttman_lincRNA_2280_._Necsulea_CUFF.231493	ENSMUSG00000072419	Dppa2	0.509372	2e-06	1.99e-05
Guttman_lincRNA_516_._Ensembl_ENSMUSG00000086454_._Necsulea_ENSMUSG00000086454	ENSMUSG00000063415	Cyp26b1	-0.509302	2e-06	1.99e-05
Guttman_lincRNA_516_._Ensembl_ENSMUSG00000086454_._Necsulea_ENSMUSG00000086454	ENSMUSG00000039081	Zfp503	-0.509215	2e-06	1.99e-05
Guttman_lincRNA_516_._Ensembl_ENSMUSG00000086454_._Necsulea_ENSMUSG00000086454	ENSMUSG00000021127	Zfp36l1	-0.509194	2e-06	1.99e-05
Guttman_lincRNA_2454	ENSMUSG00000078902	Gm14443	0.509109	2e-06	1.99e-05
Necsulea_Locus_99471_._Guttman_lincRNA_674_._Ensembl_ENSMUSG00000097639	ENSMUSG00000028358	Zfp618	-0.509058	2e-06	1.99e-05
Guttman_lincRNA_2485	ENSMUSG00000021913	Ogdhl	0.509018	2e-06	1.99e-05
Guttman_lincRNA_2485	ENSMUSG00000025503	Taldo1	0.509012	2e-06	1.99e-05
Guttman_lincRNA_516_._Ensembl_ENSMUSG00000086454_._Necsulea_ENSMUSG00000086454	ENSMUSG00000038127	Ccdc50	-0.508955	2e-06	1.99e-05
Guttman_lincRNA_2280_._Necsulea_CUFF.231493	ENSMUSG00000021748	Pdhb	0.508805	2e-06	1.99e-05
Necsulea_Locus_99471_._Guttman_lincRNA_674_._Ensembl_ENSMUSG00000097639	ENSMUSG00000031584	Gsr	0.508742	2e-06	1.99e-05
Guttman_lincRNA_2280_._Necsulea_CUFF.231493	ENSMUSG00000025357	Dgka	0.508726	2e-06	1.99e-05
Guttman_lincRNA_2454	ENSMUSG00000026219	Trip12	0.508689	2e-06	1.99e-05
Necsulea_Locus_99471_._Guttman_lincRNA_674_._Ensembl_ENSMUSG00000097639	ENSMUSG00000028807	Zbtb8a	0.508669	2e-06	1.99e-05
Guttman_lincRNA_2454	ENSMUSG00000032449	Slc25a36	0.50862	2e-06	1.99e-05
Guttman_lincRNA_2174	ENSMUSG00000029249	Rest	0.508617	2e-06	1.99e-05
Guttman_lincRNA_2280_._Necsulea_CUFF.231493	ENSMUSG00000040726	Hesx1	0.508597	2e-06	1.99e-05
Ensembl_ENSMUSG00000092349	ENSMUSG00000075394	Hoxc4	-0.508578	2e-06	1.99e-05
Guttman_lincRNA_2454	ENSMUSG00000028093	Acp6	0.508553	2e-06	1.99e-05
Necsulea_Locus_22428_._Guttman_lincRNA_2851_._Necsulea_Locus_21016	ENSMUSG00000000486	2001-09-01	0.508405	2e-06	1.99e-05
Guttman_lincRNA_1447	ENSMUSG00000028807	Zbtb8a	0.508343	2e-06	1.99e-05
Guttman_lincRNA_516_._Ensembl_ENSMUSG00000086454_._Necsulea_ENSMUSG00000086454	ENSMUSG00000017548	Suz12	0.508305	2e-06	1.99e-05
Guttman_lincRNA_516_._Ensembl_ENSMUSG00000086454_._Necsulea_ENSMUSG00000086454	ENSMUSG00000025287	Acot9	0.508303	2e-06	1.99e-05
Guttman_lincRNA_2551_._Ensembl_ENSMUSG00000078952	ENSMUSG00000020089	Ppa1	0.508278	2e-06	1.99e-05
Guttman_lincRNA_1447	ENSMUSG00000022710	Usp7	0.50827	2e-06	1.99e-05
Guttman_lincRNA_2280_._Necsulea_CUFF.231493	ENSMUSG00000017764	Zswim1	0.508126	2e-06	1.99e-05
Guttman_lincRNA_2280_._Necsulea_CUFF.231493	ENSMUSG00000000275	Trim25	0.508116	2e-06	1.99e-05
Guttman_lincRNA_542_._Ensembl_ENSMUSG00000084762_._Necsulea_ENSMUSG00000084762	ENSMUSG00000037935	Smarce1	-0.508106	2e-06	1.99e-05
Ensembl_ENSMUSG00000000031_._Ensembl_ENSMUSG00000099143_._Ensembl_ENSMUSG00000098816	Guttman_lincRNA_516_._Ensembl_ENSMUSG00000086454_._Necsulea_ENSMUSG00000086454		-0.508019	2e-06	1.99e-05
Guttman_lincRNA_516_._Ensembl_ENSMUSG00000086454_._Necsulea_ENSMUSG00000086454	ENSMUSG00000030826	Bcat2	0.507982	2e-06	1.99e-05
Guttman_lincRNA_2485	ENSMUSG00000005566	Trim28	0.507727	2e-06	1.99e-05
Ensembl_ENSMUSG00000000031_._Ensembl_ENSMUSG00000099143_._Ensembl_ENSMUSG00000098816	ENSMUSG00000037860	Aim2	-0.507723	2e-06	1.99e-05
Necsulea_Locus_99471_._Guttman_lincRNA_674_._Ensembl_ENSMUSG00000097639	ENSMUSG00000022218	Tgm1	0.507673	2e-06	1.99e-05
Ensembl_ENSMUSG00000000031_._Ensembl_ENSMUSG00000099143_._Ensembl_ENSMUSG00000098816	ENSMUSG00000002847	Pla1a	-0.50758	2e-06	1.99e-05
Guttman_lincRNA_2454	ENSMUSG00000043535	Setx	0.507567	2e-06	1.99e-05
Guttman_lincRNA_2551_._Ensembl_ENSMUSG00000078952	Guttman_lincRNA_1716_._Ensembl_ENSMUSG00000074303		0.507547	2e-06	1.99e-05
Guttman_lincRNA_2485	ENSMUSG00000055560	Zfp459	0.507385	2e-06	1.99e-05
Guttman_lincRNA_2280_._Necsulea_CUFF.231493	ENSMUSG00000039456	Morc3	0.507355	2e-06	1.99e-05
Ensembl_ENSMUSG00000000031_._Ensembl_ENSMUSG00000099143_._Ensembl_ENSMUSG00000098816	ENSMUSG00000031960	Aars	-0.507353	2e-06	1.99e-05
Guttman_lincRNA_2551_._Ensembl_ENSMUSG00000078952	ENSMUSG00000024206	Rfx2	0.507311	2e-06	1.99e-05
Guttman_lincRNA_2551_._Ensembl_ENSMUSG00000078952	ENSMUSG00000017548	Suz12	0.507309	2e-06	1.99e-05
Ensembl_ENSMUSG00000092349	ENSMUSG00000022710	Usp7	0.507143	2e-06	1.99e-05
Guttman_lincRNA_2551_._Ensembl_ENSMUSG00000078952	ENSMUSG00000028358	Zfp618	-0.507049	2e-06	1.99e-05
Ensembl_ENSMUSG00000000031_._Ensembl_ENSMUSG00000099143_._Ensembl_ENSMUSG00000098816	ENSMUSG00000030536	Iqgap1	-0.50703	2e-06	1.99e-05
Necsulea_Locus_22428_._Guttman_lincRNA_2851_._Necsulea_Locus_21016	ENSMUSG00000001604	Tcea3	0.507	2e-06	1.99e-05
Guttman_lincRNA_2454	ENSMUSG00000046337	Fam178b	0.506953	2e-06	1.99e-05
Guttman_lincRNA_2485	ENSMUSG00000038700	Hoxb5	-0.506952	2e-06	1.99e-05
Guttman_lincRNA_2485	ENSMUSG00000024505	Dtwd2	0.506804	2e-06	1.99e-05
Guttman_lincRNA_516_._Ensembl_ENSMUSG00000086454_._Necsulea_ENSMUSG00000086454	ENSMUSG00000055373	Fut9	0.506783	2e-06	1.99e-05
Guttman_lincRNA_2551_._Ensembl_ENSMUSG00000078952	ENSMUSG00000023393	Slc17a9	0.506694	2e-06	1.99e-05
Guttman_lincRNA_2454	ENSMUSG00000022099	Dmtn	0.506683	2e-06	1.99e-05
Necsulea_Locus_99471_._Guttman_lincRNA_674_._Ensembl_ENSMUSG00000097639	ENSMUSG00000091594	Gm17067	0.506481	2e-06	1.99e-05
Guttman_lincRNA_516_._Ensembl_ENSMUSG00000086454_._Necsulea_ENSMUSG00000086454	ENSMUSG00000025151	Maged1	-0.506351	2e-06	1.99e-05
Guttman_lincRNA_1716_._Ensembl_ENSMUSG00000074303	ENSMUSG00000021048	Mthfd1	0.506317	2e-06	1.99e-05
Necsulea_Locus_22428_._Guttman_lincRNA_2851_._Necsulea_Locus_21016	ENSMUSG00000073403	Gm10499	0.50623	2e-06	1.99e-05
Necsulea_Locus_22428_._Guttman_lincRNA_2851_._Necsulea_Locus_21016	ENSMUSG00000079560	Hoxa3	-0.506182	2e-06	1.99e-05
Guttman_lincRNA_1447	ENSMUSG00000043629	1700019D03Rik	0.506049	2e-06	1.99e-05
Necsulea_Locus_22428_._Guttman_lincRNA_2851_._Necsulea_Locus_21016	ENSMUSG00000087207	Gm13147	0.505905	2e-06	1.99e-05
Necsulea_Locus_22428_._Guttman_lincRNA_2851_._Necsulea_Locus_21016	ENSMUSG00000074887	EU599041	0.505895	2e-06	1.99e-05
Guttman_lincRNA_516_._Ensembl_ENSMUSG00000086454_._Necsulea_ENSMUSG00000086454	ENSMUSG00000005892	Trh	0.505872	2e-06	1.99e-05
Guttman_lincRNA_516_._Ensembl_ENSMUSG00000086454_._Necsulea_ENSMUSG00000086454	ENSMUSG00000044447	Dock5	0.505814	2e-06	1.99e-05
Ensembl_ENSMUSG00000000031_._Ensembl_ENSMUSG00000099143_._Ensembl_ENSMUSG00000098816	ENSMUSG00000063856	Gpx1	-0.505801	2e-06	1.99e-05
Guttman_lincRNA_2454	Necsulea_Locus_27300_._Guttman_lincRNA_3508		0.505794	2e-06	1.99e-05
Guttman_lincRNA_1447	ENSMUSG00000044224	Dnajc21	0.505781	2e-06	1.99e-05
Necsulea_Locus_22428_._Guttman_lincRNA_2851_._Necsulea_Locus_21016	ENSMUSG00000078495	Gm13157	0.50576	2e-06	1.99e-05
Guttman_lincRNA_1716_._Ensembl_ENSMUSG00000074303	ENSMUSG00000061062	Gm10093	0.505687	2e-06	1.99e-05
Guttman_lincRNA_2551_._Ensembl_ENSMUSG00000078952	ENSMUSG00000020027	Socs2	0.505597	2e-06	1.99e-05
Guttman_lincRNA_2454	ENSMUSG00000033386	Frrs1	0.505473	2e-06	1.99e-05
Guttman_lincRNA_1447	ENSMUSG00000031490	Eif4ebp1	0.505438	2e-06	1.99e-05
Guttman_lincRNA_516_._Ensembl_ENSMUSG00000086454_._Necsulea_ENSMUSG00000086454	ENSMUSG00000004187	Kifc2	0.505403	2e-06	1.99e-05
Ensembl_ENSMUSG00000000031_._Ensembl_ENSMUSG00000099143_._Ensembl_ENSMUSG00000098816	ENSMUSG00000004880	Lbr	-0.505268	2e-06	1.99e-05
Guttman_lincRNA_1447	ENSMUSG00000010342	Tex14	0.505176	2e-06	1.99e-05
Guttman_lincRNA_2551_._Ensembl_ENSMUSG00000078952	ENSMUSG00000038712	Fam63a	0.505173	2e-06	1.99e-05
Guttman_lincRNA_2280_._Necsulea_CUFF.231493	ENSMUSG00000047751	Utf1	0.505147	2e-06	1.99e-05
Guttman_lincRNA_2454	ENSMUSG00000067608	Pcna-ps2	0.505105	2e-06	1.99e-05
Necsulea_Locus_22428_._Guttman_lincRNA_2851_._Necsulea_Locus_21016	ENSMUSG00000032309	Fbxo22	0.505062	2e-06	1.99e-05
Guttman_lincRNA_2551_._Ensembl_ENSMUSG00000078952	ENSMUSG00000022751	Nit2	0.504981	2e-06	1.99e-05
Ensembl_ENSMUSG00000000031_._Ensembl_ENSMUSG00000099143_._Ensembl_ENSMUSG00000098816	ENSMUSG00000067377	Tspan6	0.504952	2e-06	1.99e-05
Ensembl_ENSMUSG00000000031_._Ensembl_ENSMUSG00000099143_._Ensembl_ENSMUSG00000098816	ENSMUSG00000039145	Camk1d	-0.504923	2e-06	1.99e-05
Guttman_lincRNA_2174	ENSMUSG00000038692	Hoxb4	-0.504899	2e-06	1.99e-05
Guttman_lincRNA_2485	ENSMUSG00000096696	Zfp960	0.504843	2e-06	1.99e-05
Guttman_lincRNA_2454	ENSMUSG00000052713	Zfp608	-0.504843	2e-06	1.99e-05
Ensembl_ENSMUSG00000000031_._Ensembl_ENSMUSG00000099143_._Ensembl_ENSMUSG00000098816	ENSMUSG00000081766	2210409E12Rik	-0.50482	2e-06	1.99e-05
Guttman_lincRNA_1447	ENSMUSG00000057561	Eif1a	0.504751	2e-06	1.99e-05
Guttman_lincRNA_2551_._Ensembl_ENSMUSG00000078952	ENSMUSG00000037188	Grhl3	0.504651	2e-06	1.99e-05
Guttman_lincRNA_2280_._Necsulea_CUFF.231493	ENSMUSG00000078902	Gm14443	0.504613	2e-06	1.99e-05
Guttman_lincRNA_2551_._Ensembl_ENSMUSG00000078952	ENSMUSG00000024827	Gldc	0.504516	2e-06	1.99e-05
Guttman_lincRNA_516_._Ensembl_ENSMUSG00000086454_._Necsulea_ENSMUSG00000086454	ENSMUSG00000025364	Pa2g4	0.504426	2e-06	1.99e-05
Ensembl_ENSMUSG00000000031_._Ensembl_ENSMUSG00000099143_._Ensembl_ENSMUSG00000098816	ENSMUSG00000030770	Parva	0.504418	2e-06	1.99e-05
Guttman_lincRNA_2454	ENSMUSG00000025726	Slc28a1	0.504377	2e-06	1.99e-05
Guttman_lincRNA_2485	ENSMUSG00000046449	C77370	0.504369	2e-06	1.99e-05
Ensembl_ENSMUSG00000092349	ENSMUSG00000048087	Gm4737	0.504236	2e-06	1.99e-05
Guttman_lincRNA_516_._Ensembl_ENSMUSG00000086454_._Necsulea_ENSMUSG00000086454	ENSMUSG00000030523	Trpm1	0.504144	2e-06	1.99e-05
Guttman_lincRNA_516_._Ensembl_ENSMUSG00000086454_._Necsulea_ENSMUSG00000086454	ENSMUSG00000030041	M1ap	0.504105	2e-06	1.99e-05
Ensembl_ENSMUSG00000000031_._Ensembl_ENSMUSG00000099143_._Ensembl_ENSMUSG00000098816	ENSMUSG00000024587	Nars	-0.504092	2e-06	1.99e-05
Guttman_lincRNA_2280_._Necsulea_CUFF.231493	ENSMUSG00000036667	Fam115a	-0.504033	2e-06	1.99e-05
Guttman_lincRNA_2280_._Necsulea_CUFF.231493	ENSMUSG00000018882	Mrpl45	0.503876	2e-06	1.99e-05
Guttman_lincRNA_542_._Ensembl_ENSMUSG00000084762_._Necsulea_ENSMUSG00000084762	ENSMUSG00000053654	Krt42	0.503823	2e-06	1.99e-05
Ensembl_ENSMUSG00000000031_._Ensembl_ENSMUSG00000099143_._Ensembl_ENSMUSG00000098816	ENSMUSG00000022241	Tars	-0.50367	2e-06	1.99e-05
Necsulea_Locus_99471_._Guttman_lincRNA_674_._Ensembl_ENSMUSG00000097639	ENSMUSG00000024180	Tmem8	0.503484	2e-06	1.99e-05
Guttman_lincRNA_1447	ENSMUSG00000028378	Ptgr1	0.503453	2e-06	1.99e-05
Guttman_lincRNA_2653	ENSMUSG00000027239	Mdk	0.503438	2e-06	1.99e-05
Guttman_lincRNA_2485	ENSMUSG00000020089	Ppa1	0.503353	2e-06	1.99e-05
Guttman_lincRNA_2551_._Ensembl_ENSMUSG00000078952	ENSMUSG00000038127	Ccdc50	-0.503174	2e-06	1.99e-05
Guttman_lincRNA_2551_._Ensembl_ENSMUSG00000078952	ENSMUSG00000017764	Zswim1	0.503118	2e-06	1.99e-05
Ensembl_ENSMUSG00000000031_._Ensembl_ENSMUSG00000099143_._Ensembl_ENSMUSG00000098816	ENSMUSG00000028691	Prdx1	-0.503071	2e-06	1.99e-05
Guttman_lincRNA_2551_._Ensembl_ENSMUSG00000078952	ENSMUSG00000026600	Soat1	-0.502987	2e-06	1.99e-05
Guttman_lincRNA_2551_._Ensembl_ENSMUSG00000078952	ENSMUSG00000024900	Cpt1a	0.502936	2e-06	1.99e-05
Necsulea_Locus_22428_._Guttman_lincRNA_2851_._Necsulea_Locus_21016	Guttman_lincRNA_2280_._Necsulea_CUFF.231493		0.502812	2e-06	1.99e-05
Guttman_lincRNA_2551_._Ensembl_ENSMUSG00000078952	ENSMUSG00000022304	Dpys	0.502799	2e-06	1.99e-05
Guttman_lincRNA_516_._Ensembl_ENSMUSG00000086454_._Necsulea_ENSMUSG00000086454	ENSMUSG00000034714	Ttyh2	0.502781	2e-06	1.99e-05
Necsulea_Locus_99471_._Guttman_lincRNA_674_._Ensembl_ENSMUSG00000097639	ENSMUSG00000047139	Cd24a	-0.502781	2e-06	1.99e-05
Guttman_lincRNA_2280_._Necsulea_CUFF.231493	ENSMUSG00000022241	Tars	0.502749	2e-06	1.99e-05
Guttman_lincRNA_1447	ENSMUSG00000091490	Triml2	0.50262	2e-06	1.99e-05
Necsulea_Locus_2488	ENSMUSG00000067919	Rex2	0.502574	2e-06	1.99e-05
Guttman_lincRNA_516_._Ensembl_ENSMUSG00000086454_._Necsulea_ENSMUSG00000086454	ENSMUSG00000046449	C77370	0.502551	2e-06	1.99e-05
Guttman_lincRNA_516_._Ensembl_ENSMUSG00000086454_._Necsulea_ENSMUSG00000086454	ENSMUSG00000021196	Pfkp	0.502499	2e-06	1.99e-05
Guttman_lincRNA_2280_._Necsulea_CUFF.231493	ENSMUSG00000022962	Gart	0.502445	2e-06	1.99e-05
Ensembl_ENSMUSG00000056579_._Guttman_lincRNA_2207_._Ensembl_ENSMUSG00000099081_._Ensembl_ENSMUSG00000098265_._Ensembl_ENSMUSG00000098503_._Ensembl_ENSMUSG00000098948	ENSMUSG00000013236	Ptprs	0.502437	2e-06	1.99e-05
Guttman_lincRNA_2551_._Ensembl_ENSMUSG00000078952	ENSMUSG00000043535	Setx	0.502251	2e-06	1.99e-05
Ensembl_ENSMUSG00000000031_._Ensembl_ENSMUSG00000099143_._Ensembl_ENSMUSG00000098816	ENSMUSG00000040564	Apoc1	-0.502195	2e-06	1.99e-05
Ensembl_ENSMUSG00000000031_._Ensembl_ENSMUSG00000099143_._Ensembl_ENSMUSG00000098816	ENSMUSG00000031139	Mcf2	-0.50207	2e-06	1.99e-05
Guttman_lincRNA_2551_._Ensembl_ENSMUSG00000078952	ENSMUSG00000028179	Cth	0.502027	2e-06	1.99e-05
Guttman_lincRNA_2280_._Necsulea_CUFF.231493	ENSMUSG00000025001	Hells	0.501937	2e-06	1.99e-05
Guttman_lincRNA_2551_._Ensembl_ENSMUSG00000078952	ENSMUSG00000024294	Mib1	-0.501881	2e-06	1.99e-05
Ensembl_ENSMUSG00000000031_._Ensembl_ENSMUSG00000099143_._Ensembl_ENSMUSG00000098816	ENSMUSG00000031584	Gsr	-0.501706	2e-06	1.99e-05
Guttman_lincRNA_2454	ENSMUSG00000037661	Gpr160	0.501644	2e-06	1.99e-05
Guttman_lincRNA_516_._Ensembl_ENSMUSG00000086454_._Necsulea_ENSMUSG00000086454	ENSMUSG00000028378	Ptgr1	0.501587	2e-06	1.99e-05
Guttman_lincRNA_516_._Ensembl_ENSMUSG00000086454_._Necsulea_ENSMUSG00000086454	ENSMUSG00000000275	Trim25	0.501529	2e-06	1.99e-05
Necsulea_Locus_22428_._Guttman_lincRNA_2851_._Necsulea_Locus_21016	ENSMUSG00000027547	Sall4	0.501451	2e-06	1.99e-05
Guttman_lincRNA_1716_._Ensembl_ENSMUSG00000074303	ENSMUSG00000001131	Timp1	0.501402	2e-06	1.99e-05
Guttman_lincRNA_1447	ENSMUSG00000022040	Ephx2	0.501402	2e-06	1.99e-05
Guttman_lincRNA_516_._Ensembl_ENSMUSG00000086454_._Necsulea_ENSMUSG00000086454	ENSMUSG00000038712	Fam63a	0.501189	2e-06	1.99e-05
Ensembl_ENSMUSG00000000031_._Ensembl_ENSMUSG00000099143_._Ensembl_ENSMUSG00000098816	ENSMUSG00000067860	Zic3	-0.501172	2e-06	1.99e-05
Ensembl_ENSMUSG00000000031_._Ensembl_ENSMUSG00000099143_._Ensembl_ENSMUSG00000098816	ENSMUSG00000031379	Pir	-0.500941	2e-06	1.99e-05
Guttman_lincRNA_2280_._Necsulea_CUFF.231493	ENSMUSG00000032267	Usp28	0.500835	2e-06	1.99e-05
Guttman_lincRNA_2174	ENSMUSG00000022710	Usp7	0.500828	2e-06	1.99e-05
Guttman_lincRNA_2280_._Necsulea_CUFF.231493	ENSMUSG00000062908	Acadm	0.500779	2e-06	1.99e-05
Ensembl_ENSMUSG00000000031_._Ensembl_ENSMUSG00000099143_._Ensembl_ENSMUSG00000098816	ENSMUSG00000025056	Nr0b1	-0.500698	2e-06	1.99e-05
Guttman_lincRNA_516_._Ensembl_ENSMUSG00000086454_._Necsulea_ENSMUSG00000086454	Ensembl_ENSMUSG00000056579_._Guttman_lincRNA_2207_._Ensembl_ENSMUSG00000099081_._Ensembl_ENSMUSG00000098265_._Ensembl_ENSMUSG00000098503_._Ensembl_ENSMUSG00000098948		-0.500669	2e-06	1.99e-05
Ensembl_ENSMUSG00000000031_._Ensembl_ENSMUSG00000099143_._Ensembl_ENSMUSG00000098816	ENSMUSG00000028601	Echdc2	-0.500602	2e-06	1.99e-05
Necsulea_Locus_99471_._Guttman_lincRNA_674_._Ensembl_ENSMUSG00000097639	ENSMUSG00000024039	Cbs	0.500593	2e-06	1.99e-05
Guttman_lincRNA_2551_._Ensembl_ENSMUSG00000078952	ENSMUSG00000055401	Fbxo6	0.500591	2e-06	1.99e-05
Necsulea_Locus_22428_._Guttman_lincRNA_2851_._Necsulea_Locus_21016	ENSMUSG00000040564	Apoc1	0.500583	2e-06	1.99e-05
Guttman_lincRNA_2551_._Ensembl_ENSMUSG00000078952	ENSMUSG00000049969	Plekhf2	0.500582	2e-06	1.99e-05
Guttman_lincRNA_516_._Ensembl_ENSMUSG00000086454_._Necsulea_ENSMUSG00000086454	ENSMUSG00000022419	Deptor	0.500409	2e-06	1.99e-05
Ensembl_ENSMUSG00000000031_._Ensembl_ENSMUSG00000099143_._Ensembl_ENSMUSG00000098816	ENSMUSG00000022221	Ripk3	-0.500401	2e-06	1.99e-05
Guttman_lincRNA_2280_._Necsulea_CUFF.231493	ENSMUSG00000014245	Pigl	0.500309	2e-06	1.99e-05
Guttman_lincRNA_2551_._Ensembl_ENSMUSG00000078952	ENSMUSG00000024505	Dtwd2	0.500269	2e-06	1.99e-05
Guttman_lincRNA_1716_._Ensembl_ENSMUSG00000074303	ENSMUSG00000021665	Hexb	0.500245	2e-06	1.99e-05
Guttman_lincRNA_516_._Ensembl_ENSMUSG00000086454_._Necsulea_ENSMUSG00000086454	ENSMUSG00000032309	Fbxo22	0.500226	2e-06	1.99e-05
Necsulea_Locus_22428_._Guttman_lincRNA_2851_._Necsulea_Locus_21016	ENSMUSG00000059552	Trp53	0.500218	2e-06	1.99e-05
Guttman_lincRNA_2485	ENSMUSG00000015354	Pcolce2	0.500215	2e-06	1.99e-05
Guttman_lincRNA_516_._Ensembl_ENSMUSG00000086454_._Necsulea_ENSMUSG00000086454	ENSMUSG00000028109	Hormad1	0.500197	2e-06	1.99e-05
Guttman_lincRNA_516_._Ensembl_ENSMUSG00000086454_._Necsulea_ENSMUSG00000086454	ENSMUSG00000027610	Gss	0.500163	2e-06	1.99e-05
Guttman_lincRNA_2551_._Ensembl_ENSMUSG00000078952	ENSMUSG00000017561	Crlf3	0.500109	2e-06	1.99e-05
Guttman_lincRNA_1716_._Ensembl_ENSMUSG00000074303	ENSMUSG00000076431	Sox4	-0.500084	2e-06	1.99e-05
Ensembl_ENSMUSG00000000031_._Ensembl_ENSMUSG00000099143_._Ensembl_ENSMUSG00000098816	ENSMUSG00000022892	App	0.500067	2e-06	1.99e-05
Guttman_lincRNA_2551_._Ensembl_ENSMUSG00000078952	ENSMUSG00000040651	D14Abb1e	0.499987	2e-06	1.99e-05
Guttman_lincRNA_1447	ENSMUSG00000028601	Echdc2	0.499766	2e-06	1.99e-05
Guttman_lincRNA_2485	ENSMUSG00000036743	Psma8	0.49968	2e-06	1.99e-05
Ensembl_ENSMUSG00000000031_._Ensembl_ENSMUSG00000099143_._Ensembl_ENSMUSG00000098816	ENSMUSG00000032715	Trib3	-0.499618	2e-06	1.99e-05
Ensembl_ENSMUSG00000000031_._Ensembl_ENSMUSG00000099143_._Ensembl_ENSMUSG00000098816	ENSMUSG00000032397	Tipin	-0.499609	2e-06	1.99e-05
Ensembl_ENSMUSG00000000031_._Ensembl_ENSMUSG00000099143_._Ensembl_ENSMUSG00000098816	ENSMUSG00000028358	Zfp618	0.499589	2e-06	1.99e-05
Ensembl_ENSMUSG00000000031_._Ensembl_ENSMUSG00000099143_._Ensembl_ENSMUSG00000098816	ENSMUSG00000069662	Marcks	0.499534	2e-06	1.99e-05
Guttman_lincRNA_2454	ENSMUSG00000027233	Patl2	0.499448	2e-06	1.99e-05
Guttman_lincRNA_1716_._Ensembl_ENSMUSG00000074303	ENSMUSG00000026917	Wdr5	0.499413	2e-06	1.99e-05
Guttman_lincRNA_1716_._Ensembl_ENSMUSG00000074303	ENSMUSG00000020089	Ppa1	0.4994	2e-06	1.99e-05
Guttman_lincRNA_1716_._Ensembl_ENSMUSG00000074303	ENSMUSG00000020173	Cobl	0.499389	2e-06	1.99e-05
Guttman_lincRNA_2551_._Ensembl_ENSMUSG00000078952	ENSMUSG00000034158	Lrrc58	-0.499378	2e-06	1.99e-05
Necsulea_Locus_99471_._Guttman_lincRNA_674_._Ensembl_ENSMUSG00000097639	ENSMUSG00000025364	Pa2g4	0.499333	2e-06	1.99e-05
Guttman_lincRNA_2032	ENSMUSG00000028691	Prdx1	0.499312	2e-06	1.99e-05
Necsulea_Locus_22428_._Guttman_lincRNA_2851_._Necsulea_Locus_21016	ENSMUSG00000081037	Gm13929	0.499283	2e-06	1.99e-05
Necsulea_Locus_22428_._Guttman_lincRNA_2851_._Necsulea_Locus_21016	ENSMUSG00000001827	Folr1	0.499193	2e-06	1.99e-05
Guttman_lincRNA_516_._Ensembl_ENSMUSG00000086454_._Necsulea_ENSMUSG00000086454	ENSMUSG00000038793	Lefty1	0.499116	2e-06	1.99e-05
Guttman_lincRNA_2551_._Ensembl_ENSMUSG00000078952	ENSMUSG00000006056	Calcoco2	0.49911	2e-06	1.99e-05
Guttman_lincRNA_542_._Ensembl_ENSMUSG00000084762_._Necsulea_ENSMUSG00000084762	ENSMUSG00000062908	Acadm	0.49908	2e-06	1.99e-05
Guttman_lincRNA_2551_._Ensembl_ENSMUSG00000078952	ENSMUSG00000000942	Hoxa4	-0.499042	2e-06	1.99e-05
Guttman_lincRNA_1447	ENSMUSG00000039145	Camk1d	0.498906	2e-06	1.99e-05
Guttman_lincRNA_2551_._Ensembl_ENSMUSG00000078952	ENSMUSG00000020900	Myh10	-0.498895	2e-06	1.99e-05
Guttman_lincRNA_2280_._Necsulea_CUFF.231493	ENSMUSG00000048376	F2r	-0.498837	2e-06	1.99e-05
Guttman_lincRNA_2485	ENSMUSG00000055102	Zfp819	0.498791	2e-06	1.99e-05
Ensembl_ENSMUSG00000000031_._Ensembl_ENSMUSG00000099143_._Ensembl_ENSMUSG00000098816	ENSMUSG00000022474	Pmm1	-0.498678	2e-06	1.99e-05
Guttman_lincRNA_2551_._Ensembl_ENSMUSG00000078952	Necsulea_Locus_27300_._Guttman_lincRNA_3508		0.498641	2e-06	1.99e-05
Guttman_lincRNA_2485	ENSMUSG00000057561	Eif1a	0.498567	2e-06	1.99e-05
Guttman_lincRNA_1447	ENSMUSG00000052776	Oas1a	0.498517	2e-06	1.99e-05
Guttman_lincRNA_1447	ENSMUSG00000095834	Tdgf1-ps1	0.49851	2e-06	1.99e-05
Guttman_lincRNA_2551_._Ensembl_ENSMUSG00000078952	ENSMUSG00000040488	Ltbp4	0.49843	2e-06	1.99e-05
Guttman_lincRNA_2485	ENSMUSG00000028528	Dnajc6	0.498427	2e-06	1.99e-05
Guttman_lincRNA_2485	ENSMUSG00000020361	Hspa4	0.49837	2e-06	1.99e-05
Guttman_lincRNA_1716_._Ensembl_ENSMUSG00000074303	ENSMUSG00000032224	Fam81a	0.498363	2e-06	1.99e-05
Guttman_lincRNA_2454	ENSMUSG00000025856	Pdgfa	0.498343	2e-06	1.99e-05
Guttman_lincRNA_2280_._Necsulea_CUFF.231493	ENSMUSG00000024151	Msh2	0.498323	2e-06	1.99e-05
Guttman_lincRNA_516_._Ensembl_ENSMUSG00000086454_._Necsulea_ENSMUSG00000086454	ENSMUSG00000004038	Gstm3	0.498306	2e-06	1.99e-05
Guttman_lincRNA_2454	ENSMUSG00000001131	Timp1	0.498116	2e-06	1.99e-05
Guttman_lincRNA_1447	ENSMUSG00000022114	Spry2	0.498111	2e-06	1.99e-05
Guttman_lincRNA_1716_._Ensembl_ENSMUSG00000074303	ENSMUSG00000064194	Zfp936	0.498093	2e-06	1.99e-05
Guttman_lincRNA_1447	ENSMUSG00000029922	Mkrn1	0.498063	2e-06	1.99e-05
Guttman_lincRNA_2551_._Ensembl_ENSMUSG00000078952	ENSMUSG00000020173	Cobl	0.498045	2e-06	1.99e-05
Ensembl_ENSMUSG00000000031_._Ensembl_ENSMUSG00000099143_._Ensembl_ENSMUSG00000098816	ENSMUSG00000028173	Wls	0.498012	2e-06	1.99e-05
Guttman_lincRNA_1447	ENSMUSG00000037188	Grhl3	0.497972	2e-06	1.99e-05
Guttman_lincRNA_516_._Ensembl_ENSMUSG00000086454_._Necsulea_ENSMUSG00000086454	ENSMUSG00000026245	Farsb	0.497949	2e-06	1.99e-05
Necsulea_Locus_99471_._Guttman_lincRNA_674_._Ensembl_ENSMUSG00000097639	ENSMUSG00000092335	Gm7221	0.497891	2e-06	1.99e-05
Guttman_lincRNA_2280_._Necsulea_CUFF.231493	ENSMUSG00000028488	Sh3gl2	0.497855	2e-06	1.99e-05
Guttman_lincRNA_2551_._Ensembl_ENSMUSG00000078952	ENSMUSG00000034573	Ptpn13	-0.497853	2e-06	1.99e-05
Ensembl_ENSMUSG00000092349	ENSMUSG00000052997	Uba2	0.497744	2e-06	1.99e-05
Ensembl_ENSMUSG00000000031_._Ensembl_ENSMUSG00000099143_._Ensembl_ENSMUSG00000098816	ENSMUSG00000047139	Cd24a	0.497676	2e-06	1.99e-05
Guttman_lincRNA_1716_._Ensembl_ENSMUSG00000074303	ENSMUSG00000026576	Atp1b1	0.497674	2e-06	1.99e-05
Ensembl_ENSMUSG00000092349	ENSMUSG00000039224	D1Pas1	0.497657	2e-06	1.99e-05
Guttman_lincRNA_2551_._Ensembl_ENSMUSG00000078952	ENSMUSG00000020361	Hspa4	0.497576	2e-06	1.99e-05
Guttman_lincRNA_2454	ENSMUSG00000018239	Zcchc10	0.497531	2e-06	1.99e-05
Guttman_lincRNA_2551_._Ensembl_ENSMUSG00000078952	ENSMUSG00000019916	P4ha1	-0.497515	2e-06	1.99e-05
Guttman_lincRNA_516_._Ensembl_ENSMUSG00000086454_._Necsulea_ENSMUSG00000086454	ENSMUSG00000043535	Setx	0.497423	2e-06	1.99e-05
Guttman_lincRNA_2454	ENSMUSG00000024587	Nars	0.497325	2e-06	1.99e-05
Guttman_lincRNA_516_._Ensembl_ENSMUSG00000086454_._Necsulea_ENSMUSG00000086454	ENSMUSG00000032224	Fam81a	0.497258	2e-06	1.99e-05
Ensembl_ENSMUSG00000000031_._Ensembl_ENSMUSG00000099143_._Ensembl_ENSMUSG00000098816	ENSMUSG00000063415	Cyp26b1	0.497193	2e-06	1.99e-05
Guttman_lincRNA_2280_._Necsulea_CUFF.231493	ENSMUSG00000020900	Myh10	-0.497077	2e-06	1.99e-05
Guttman_lincRNA_516_._Ensembl_ENSMUSG00000086454_._Necsulea_ENSMUSG00000086454	ENSMUSG00000022892	App	-0.497053	2e-06	1.99e-05
Guttman_lincRNA_2551_._Ensembl_ENSMUSG00000078952	ENSMUSG00000013076	Amotl1	-0.497034	2e-06	1.99e-05
Guttman_lincRNA_1716_._Ensembl_ENSMUSG00000074303	ENSMUSG00000033685	Ucp2	0.497031	2e-06	1.99e-05
Guttman_lincRNA_1716_._Ensembl_ENSMUSG00000074303	ENSMUSG00000055102	Zfp819	0.496882	2e-06	1.99e-05
Guttman_lincRNA_2280_._Necsulea_CUFF.231493	ENSMUSG00000038127	Ccdc50	-0.496809	2e-06	1.99e-05
Ensembl_ENSMUSG00000000031_._Ensembl_ENSMUSG00000099143_._Ensembl_ENSMUSG00000098816	ENSMUSG00000001300	Efnb2	0.49674	2e-06	1.99e-05
Necsulea_Locus_22428_._Guttman_lincRNA_2851_._Necsulea_Locus_21016	ENSMUSG00000055653	Gpc3	-0.496735	2e-06	1.99e-05
Guttman_lincRNA_2280_._Necsulea_CUFF.231493	ENSMUSG00000023022	Lima1	0.496735	2e-06	1.99e-05
Guttman_lincRNA_516_._Ensembl_ENSMUSG00000086454_._Necsulea_ENSMUSG00000086454	ENSMUSG00000047751	Utf1	0.496729	2e-06	1.99e-05
Ensembl_ENSMUSG00000000031_._Ensembl_ENSMUSG00000099143_._Ensembl_ENSMUSG00000098816	ENSMUSG00000023393	Slc17a9	-0.496702	2e-06	1.99e-05
Guttman_lincRNA_2551_._Ensembl_ENSMUSG00000078952	ENSMUSG00000061143	Maml3	-0.496682	2e-06	1.99e-05
Guttman_lincRNA_516_._Ensembl_ENSMUSG00000086454_._Necsulea_ENSMUSG00000086454	ENSMUSG00000003235	Eif2b5	0.496659	2e-06	1.99e-05
Guttman_lincRNA_2280_._Necsulea_CUFF.231493	ENSMUSG00000020634	Ubxn2a	0.496551	2e-06	1.99e-05
Necsulea_Locus_99471_._Guttman_lincRNA_674_._Ensembl_ENSMUSG00000097639	ENSMUSG00000006818	Sod2	0.496518	2e-06	1.99e-05
Guttman_lincRNA_2454	ENSMUSG00000031960	Aars	0.496465	2e-06	1.99e-05
Guttman_lincRNA_516_._Ensembl_ENSMUSG00000086454_._Necsulea_ENSMUSG00000086454	ENSMUSG00000020361	Hspa4	0.496399	2e-06	1.99e-05
Necsulea_Locus_22428_._Guttman_lincRNA_2851_._Necsulea_Locus_21016	ENSMUSG00000018377	Vezf1	-0.496352	2e-06	1.99e-05
Guttman_lincRNA_1716_._Ensembl_ENSMUSG00000074303	ENSMUSG00000004880	Lbr	0.496302	2e-06	1.99e-05
Ensembl_ENSMUSG00000000031_._Ensembl_ENSMUSG00000099143_._Ensembl_ENSMUSG00000098816	ENSMUSG00000059552	Trp53	-0.496256	2e-06	1.99e-05
Guttman_lincRNA_1447	ENSMUSG00000027452	Acss1	0.496237	2e-06	1.99e-05
Guttman_lincRNA_2551_._Ensembl_ENSMUSG00000078952	ENSMUSG00000028587	Orc1	0.496209	2e-06	1.99e-05
Ensembl_ENSMUSG00000000031_._Ensembl_ENSMUSG00000099143_._Ensembl_ENSMUSG00000098816	ENSMUSG00000087166	L1td1	-0.496185	2e-06	1.99e-05
Guttman_lincRNA_2551_._Ensembl_ENSMUSG00000078952	ENSMUSG00000026005	Rpe	0.496145	2e-06	1.99e-05
Guttman_lincRNA_2551_._Ensembl_ENSMUSG00000078952	ENSMUSG00000000708	Kat2b	0.496115	2e-06	1.99e-05
Guttman_lincRNA_1447	ENSMUSG00000038151	Prdm1	0.496068	2e-06	1.99e-05
Necsulea_Locus_99471_._Guttman_lincRNA_674_._Ensembl_ENSMUSG00000097639	ENSMUSG00000061143	Maml3	-0.496045	2e-06	1.99e-05
Guttman_lincRNA_2551_._Ensembl_ENSMUSG00000078952	ENSMUSG00000035246	Pcyt1b	0.496039	2e-06	1.99e-05
Guttman_lincRNA_2485	ENSMUSG00000034203	Chchd4	0.495972	2e-06	1.99e-05
Guttman_lincRNA_516_._Ensembl_ENSMUSG00000086454_._Necsulea_ENSMUSG00000086454	ENSMUSG00000025503	Taldo1	0.495959	2e-06	1.99e-05
Guttman_lincRNA_2551_._Ensembl_ENSMUSG00000078952	ENSMUSG00000031432	Prps1	0.495805	2e-06	1.99e-05
Guttman_lincRNA_1716_._Ensembl_ENSMUSG00000074303	ENSMUSG00000023150	Ivns1abp	-0.495802	2e-06	1.99e-05
Guttman_lincRNA_2280_._Necsulea_CUFF.231493	ENSMUSG00000026219	Trip12	0.495797	2e-06	1.99e-05
Guttman_lincRNA_2551_._Ensembl_ENSMUSG00000078952	ENSMUSG00000051316	Taf7	0.49579	2e-06	1.99e-05
Guttman_lincRNA_1716_._Ensembl_ENSMUSG00000074303	ENSMUSG00000029249	Rest	0.495787	2e-06	1.99e-05
Guttman_lincRNA_2485	ENSMUSG00000032366	Tpm1	-0.495757	2e-06	1.99e-05
Guttman_lincRNA_1716_._Ensembl_ENSMUSG00000074303	ENSMUSG00000032715	Trib3	0.495642	2e-06	1.99e-05
Guttman_lincRNA_516_._Ensembl_ENSMUSG00000086454_._Necsulea_ENSMUSG00000086454	ENSMUSG00000017764	Zswim1	0.495618	2e-06	1.99e-05
Guttman_lincRNA_2280_._Necsulea_CUFF.231493	ENSMUSG00000015112	Slc25a13	0.495614	2e-06	1.99e-05
Guttman_lincRNA_2551_._Ensembl_ENSMUSG00000078952	ENSMUSG00000037487	Ubr5	0.495566	2e-06	1.99e-05
Guttman_lincRNA_2551_._Ensembl_ENSMUSG00000078952	ENSMUSG00000024140	Epas1	0.495556	2e-06	1.99e-05
Ensembl_ENSMUSG00000000031_._Ensembl_ENSMUSG00000099143_._Ensembl_ENSMUSG00000098816	ENSMUSG00000016319	Slc25a5	-0.495494	2e-06	1.99e-05
Necsulea_Locus_99471_._Guttman_lincRNA_674_._Ensembl_ENSMUSG00000097639	ENSMUSG00000031403	Dkc1	0.495387	2e-06	1.99e-05
Guttman_lincRNA_2280_._Necsulea_CUFF.231493	ENSMUSG00000005981	Trap1	0.495385	2e-06	1.99e-05
Guttman_lincRNA_2551_._Ensembl_ENSMUSG00000078952	ENSMUSG00000039224	D1Pas1	0.495345	2e-06	1.99e-05
Guttman_lincRNA_516_._Ensembl_ENSMUSG00000086454_._Necsulea_ENSMUSG00000086454	ENSMUSG00000056758	Hmga2	-0.49533	2e-06	1.99e-05
Guttman_lincRNA_2280_._Necsulea_CUFF.231493	ENSMUSG00000020419	Hormad2	0.495281	2e-06	1.99e-05
Guttman_lincRNA_542_._Ensembl_ENSMUSG00000084762_._Necsulea_ENSMUSG00000084762	ENSMUSG00000027233	Patl2	0.495253	2e-06	1.99e-05
Guttman_lincRNA_2454	ENSMUSG00000021748	Pdhb	0.495237	2e-06	1.99e-05
Guttman_lincRNA_2485	ENSMUSG00000061143	Maml3	-0.495178	2e-06	1.99e-05
Guttman_lincRNA_516_._Ensembl_ENSMUSG00000086454_._Necsulea_ENSMUSG00000086454	ENSMUSG00000033837	Foxh1	0.49515	2e-06	1.99e-05
Guttman_lincRNA_1716_._Ensembl_ENSMUSG00000074303	ENSMUSG00000030849	Fgfr2	-0.495121	2e-06	1.99e-05
Necsulea_Locus_99471_._Guttman_lincRNA_674_._Ensembl_ENSMUSG00000097639	ENSMUSG00000025001	Hells	0.495116	2e-06	1.99e-05
Guttman_lincRNA_1716_._Ensembl_ENSMUSG00000074303	ENSMUSG00000054662	Ano9	0.495016	2e-06	1.99e-05
Guttman_lincRNA_2454	ENSMUSG00000034205	Loxl2	-0.494957	2e-06	1.99e-05
Guttman_lincRNA_516_._Ensembl_ENSMUSG00000086454_._Necsulea_ENSMUSG00000086454	ENSMUSG00000044033	Ccdc141	0.494927	2e-06	1.99e-05
Ensembl_ENSMUSG00000000031_._Ensembl_ENSMUSG00000099143_._Ensembl_ENSMUSG00000098816	ENSMUSG00000095193	Gm20939	-0.494925	2e-06	1.99e-05
Guttman_lincRNA_2551_._Ensembl_ENSMUSG00000078952	ENSMUSG00000096696	Zfp960	0.494913	2e-06	1.99e-05
Ensembl_ENSMUSG00000000031_._Ensembl_ENSMUSG00000099143_._Ensembl_ENSMUSG00000098816	ENSMUSG00000031246	Sh3bgrl	0.49482	2e-06	1.99e-05
Guttman_lincRNA_1447	ENSMUSG00000026193	Fn1	0.49476	2e-06	1.99e-05
Necsulea_Locus_22428_._Guttman_lincRNA_2851_._Necsulea_Locus_21016	ENSMUSG00000052102	Gnpda1	0.494749	2e-06	1.99e-05
Guttman_lincRNA_542_._Ensembl_ENSMUSG00000084762_._Necsulea_ENSMUSG00000084762	ENSMUSG00000028109	Hormad1	0.494736	2e-06	1.99e-05
Ensembl_ENSMUSG00000000031_._Ensembl_ENSMUSG00000099143_._Ensembl_ENSMUSG00000098816	ENSMUSG00000021360	Gcnt2	-0.494734	2e-06	1.99e-05
Guttman_lincRNA_2280_._Necsulea_CUFF.231493	ENSMUSG00000026669	Mcm10	0.494682	2e-06	1.99e-05
Guttman_lincRNA_1447	ENSMUSG00000039395	Mreg	0.49459	2e-06	1.99e-05
Guttman_lincRNA_2485	ENSMUSG00000022304	Dpys	0.494505	2e-06	1.99e-05
Guttman_lincRNA_2280_._Necsulea_CUFF.231493	ENSMUSG00000043411	Usp48	0.494502	2e-06	1.99e-05
Guttman_lincRNA_1447	ENSMUSG00000042808	Gpx2	0.494463	2e-06	1.99e-05
Guttman_lincRNA_2485	ENSMUSG00000025151	Maged1	-0.494455	2e-06	1.99e-05
Guttman_lincRNA_516_._Ensembl_ENSMUSG00000086454_._Necsulea_ENSMUSG00000086454	ENSMUSG00000029860	Zyx	-0.494441	2e-06	1.99e-05
Guttman_lincRNA_1447	ENSMUSG00000023150	Ivns1abp	-0.494422	2e-06	1.99e-05
Guttman_lincRNA_1447	ENSMUSG00000033826	Dnah8	0.494379	2e-06	1.99e-05
Guttman_lincRNA_516_._Ensembl_ENSMUSG00000086454_._Necsulea_ENSMUSG00000086454	ENSMUSG00000018239	Zcchc10	0.494296	2e-06	1.99e-05
Guttman_lincRNA_2485	ENSMUSG00000078902	Gm14443	0.494291	2e-06	1.99e-05
Necsulea_Locus_99471_._Guttman_lincRNA_674_._Ensembl_ENSMUSG00000097639	ENSMUSG00000021360	Gcnt2	0.494176	2e-06	1.99e-05
Guttman_lincRNA_2551_._Ensembl_ENSMUSG00000078952	ENSMUSG00000030031	Kbtbd8	0.494143	2e-06	1.99e-05
Necsulea_Locus_99471_._Guttman_lincRNA_674_._Ensembl_ENSMUSG00000097639	ENSMUSG00000052776	Oas1a	0.494135	2e-06	1.99e-05
Ensembl_ENSMUSG00000092349	ENSMUSG00000036743	Psma8	0.494101	2e-06	1.99e-05
Guttman_lincRNA_2454	ENSMUSG00000051316	Taf7	0.494058	2e-06	1.99e-05
Necsulea_Locus_99471_._Guttman_lincRNA_674_._Ensembl_ENSMUSG00000097639	ENSMUSG00000025503	Taldo1	0.494031	2e-06	1.99e-05
Guttman_lincRNA_516_._Ensembl_ENSMUSG00000086454_._Necsulea_ENSMUSG00000086454	ENSMUSG00000063354	Slc39a4	0.494012	2e-06	1.99e-05
Guttman_lincRNA_2551_._Ensembl_ENSMUSG00000078952	Ensembl_ENSMUSG00000056579_._Guttman_lincRNA_2207_._Ensembl_ENSMUSG00000099081_._Ensembl_ENSMUSG00000098265_._Ensembl_ENSMUSG00000098503_._Ensembl_ENSMUSG00000098948		-0.493907	2e-06	1.99e-05
Guttman_lincRNA_2551_._Ensembl_ENSMUSG00000078952	ENSMUSG00000027506	Tpd52	0.493858	2e-06	1.99e-05
Guttman_lincRNA_2280_._Necsulea_CUFF.231493	ENSMUSG00000025364	Pa2g4	0.493813	2e-06	1.99e-05
Guttman_lincRNA_2454	ENSMUSG00000038151	Prdm1	0.493782	2e-06	1.99e-05
Ensembl_ENSMUSG00000000031_._Ensembl_ENSMUSG00000099143_._Ensembl_ENSMUSG00000098816	ENSMUSG00000020173	Cobl	-0.493772	2e-06	1.99e-05
Guttman_lincRNA_2551_._Ensembl_ENSMUSG00000078952	ENSMUSG00000026187	Xrcc5	0.493609	2e-06	1.99e-05
Ensembl_ENSMUSG00000000031_._Ensembl_ENSMUSG00000099143_._Ensembl_ENSMUSG00000098816	ENSMUSG00000037935	Smarce1	0.493535	2e-06	1.99e-05
Necsulea_Locus_22428_._Guttman_lincRNA_2851_._Necsulea_Locus_21016	Guttman_lincRNA_2485		0.493496	2e-06	1.99e-05
Ensembl_ENSMUSG00000000031_._Ensembl_ENSMUSG00000099143_._Ensembl_ENSMUSG00000098816	ENSMUSG00000046000	Naa11	-0.493469	2e-06	1.99e-05
Guttman_lincRNA_2551_._Ensembl_ENSMUSG00000078952	ENSMUSG00000044224	Dnajc21	0.493464	2e-06	1.99e-05
Guttman_lincRNA_2280_._Necsulea_CUFF.231493	ENSMUSG00000043535	Setx	0.49346	2e-06	1.99e-05
Guttman_lincRNA_2551_._Ensembl_ENSMUSG00000078952	ENSMUSG00000020649	Rrm2	0.493442	2e-06	1.99e-05
Guttman_lincRNA_1447	Necsulea_Locus_22428_._Guttman_lincRNA_2851_._Necsulea_Locus_21016		0.493439	2e-06	1.99e-05
Guttman_lincRNA_1447	ENSMUSG00000062929	Cfl2	-0.493389	2e-06	1.99e-05
Guttman_lincRNA_2551_._Ensembl_ENSMUSG00000078952	ENSMUSG00000042834	Nrep	-0.493374	2e-06	1.99e-05
Guttman_lincRNA_2551_._Ensembl_ENSMUSG00000078952	ENSMUSG00000024030	Abcg1	0.493345	2e-06	1.99e-05
Guttman_lincRNA_1716_._Ensembl_ENSMUSG00000074303	ENSMUSG00000031960	Aars	0.493333	2e-06	1.99e-05
Guttman_lincRNA_1716_._Ensembl_ENSMUSG00000074303	ENSMUSG00000095193	Gm20939	0.493222	2e-06	1.99e-05
Guttman_lincRNA_1716_._Ensembl_ENSMUSG00000074303	ENSMUSG00000057561	Eif1a	0.493163	2e-06	1.99e-05
Guttman_lincRNA_2280_._Necsulea_CUFF.231493	ENSMUSG00000067608	Pcna-ps2	0.493053	2e-06	1.99e-05
Guttman_lincRNA_2485	Necsulea_Locus_27300_._Guttman_lincRNA_3508		0.492959	2e-06	1.99e-05
Guttman_lincRNA_516_._Ensembl_ENSMUSG00000086454_._Necsulea_ENSMUSG00000086454	ENSMUSG00000028179	Cth	0.492893	2e-06	1.99e-05
Guttman_lincRNA_2280_._Necsulea_CUFF.231493	ENSMUSG00000033386	Frrs1	0.492775	2e-06	1.99e-05
Necsulea_Locus_99471_._Guttman_lincRNA_674_._Ensembl_ENSMUSG00000097639	ENSMUSG00000031651	Triml1	0.492772	2e-06	1.99e-05
Guttman_lincRNA_2454	ENSMUSG00000025151	Maged1	-0.492736	2e-06	1.99e-05
Guttman_lincRNA_2551_._Ensembl_ENSMUSG00000078952	ENSMUSG00000020363	Gfpt2	0.4927	2e-06	1.99e-05
Necsulea_Locus_22428_._Guttman_lincRNA_2851_._Necsulea_Locus_21016	ENSMUSG00000037935	Smarce1	-0.492588	2e-06	1.99e-05
Guttman_lincRNA_516_._Ensembl_ENSMUSG00000086454_._Necsulea_ENSMUSG00000086454	ENSMUSG00000024206	Rfx2	0.492507	2e-06	1.99e-05
Guttman_lincRNA_2174	ENSMUSG00000079471	Gm7325	0.492426	2e-06	1.99e-05
Ensembl_ENSMUSG00000000031_._Ensembl_ENSMUSG00000099143_._Ensembl_ENSMUSG00000098816	ENSMUSG00000000942	Hoxa4	0.492412	2e-06	1.99e-05
Guttman_lincRNA_2485	ENSMUSG00000023393	Slc17a9	0.492391	2e-06	1.99e-05
Guttman_lincRNA_2551_._Ensembl_ENSMUSG00000078952	ENSMUSG00000026219	Trip12	0.492391	2e-06	1.99e-05
Guttman_lincRNA_1447	ENSMUSG00000002847	Pla1a	0.492337	2e-06	1.99e-05
Guttman_lincRNA_2280_._Necsulea_CUFF.231493	ENSMUSG00000020363	Gfpt2	0.492295	2e-06	1.99e-05
Guttman_lincRNA_1447	ENSMUSG00000019947	Arid5b	0.49226	2e-06	1.99e-05
Ensembl_ENSMUSG00000000031_._Ensembl_ENSMUSG00000099143_._Ensembl_ENSMUSG00000098816	ENSMUSG00000028807	Zbtb8a	-0.49225	2e-06	1.99e-05
Guttman_lincRNA_2280_._Necsulea_CUFF.231493	ENSMUSG00000028587	Orc1	0.492217	2e-06	1.99e-05
Guttman_lincRNA_2551_._Ensembl_ENSMUSG00000078952	ENSMUSG00000031987	Egln1	-0.492045	2e-06	1.99e-05
Guttman_lincRNA_2551_._Ensembl_ENSMUSG00000078952	ENSMUSG00000022419	Deptor	0.491943	2e-06	1.99e-05
Guttman_lincRNA_1447	ENSMUSG00000001542	Ell2	0.491873	2e-06	1.99e-05
Guttman_lincRNA_542_._Ensembl_ENSMUSG00000084762_._Necsulea_ENSMUSG00000084762	Necsulea_Locus_27300_._Guttman_lincRNA_3508		0.491859	2e-06	1.99e-05
Guttman_lincRNA_516_._Ensembl_ENSMUSG00000086454_._Necsulea_ENSMUSG00000086454	ENSMUSG00000032267	Usp28	0.491831	2e-06	1.99e-05
Necsulea_Locus_99471_._Guttman_lincRNA_674_._Ensembl_ENSMUSG00000097639	ENSMUSG00000040488	Ltbp4	0.491821	2e-06	1.99e-05
Guttman_lincRNA_516_._Ensembl_ENSMUSG00000086454_._Necsulea_ENSMUSG00000086454	ENSMUSG00000024006	Stk38	0.491817	2e-06	1.99e-05
Guttman_lincRNA_1447	ENSMUSG00000018727	Cpsf4l	0.491815	2e-06	1.99e-05
Guttman_lincRNA_516_._Ensembl_ENSMUSG00000086454_._Necsulea_ENSMUSG00000086454	ENSMUSG00000025903	Lypla1	0.491811	2e-06	1.99e-05
Guttman_lincRNA_2454	ENSMUSG00000024421	Lama3	0.491811	2e-06	1.99e-05
Necsulea_Locus_22428_._Guttman_lincRNA_2851_._Necsulea_Locus_21016	Guttman_lincRNA_542_._Ensembl_ENSMUSG00000084762_._Necsulea_ENSMUSG00000084762		0.491722	2e-06	1.99e-05
Guttman_lincRNA_2280_._Necsulea_CUFF.231493	ENSMUSG00000024493	Lars	0.49168	2e-06	1.99e-05
Ensembl_ENSMUSG00000000031_._Ensembl_ENSMUSG00000099143_._Ensembl_ENSMUSG00000098816	ENSMUSG00000038692	Hoxb4	0.491679	2e-06	1.99e-05
Guttman_lincRNA_2551_._Ensembl_ENSMUSG00000078952	ENSMUSG00000041592	Sdk2	-0.491607	2e-06	1.99e-05
Guttman_lincRNA_516_._Ensembl_ENSMUSG00000086454_._Necsulea_ENSMUSG00000086454	ENSMUSG00000038151	Prdm1	0.49156	2e-06	1.99e-05
Necsulea_Locus_22428_._Guttman_lincRNA_2851_._Necsulea_Locus_21016	ENSMUSG00000043629	1700019D03Rik	0.491476	2e-06	1.99e-05
Guttman_lincRNA_516_._Ensembl_ENSMUSG00000086454_._Necsulea_ENSMUSG00000086454	ENSMUSG00000018604	Tbx3	0.491357	2e-06	1.99e-05
Necsulea_Locus_22428_._Guttman_lincRNA_2851_._Necsulea_Locus_21016	ENSMUSG00000092225	Gm2381	0.491347	2e-06	1.99e-05
Guttman_lincRNA_2454	ENSMUSG00000020361	Hspa4	0.491344	2e-06	1.99e-05
Necsulea_Locus_22428_._Guttman_lincRNA_2851_._Necsulea_Locus_21016	ENSMUSG00000030619	Eed	0.491319	2e-06	1.99e-05
Guttman_lincRNA_1716_._Ensembl_ENSMUSG00000074303	ENSMUSG00000073403	Gm10499	0.491284	2e-06	1.99e-05
Guttman_lincRNA_542_._Ensembl_ENSMUSG00000084762_._Necsulea_ENSMUSG00000084762	ENSMUSG00000038515	Grtp1	0.491275	2e-06	1.99e-05
Guttman_lincRNA_516_._Ensembl_ENSMUSG00000086454_._Necsulea_ENSMUSG00000086454	ENSMUSG00000031758	Cdyl2	0.491246	2e-06	1.99e-05
Guttman_lincRNA_2551_._Ensembl_ENSMUSG00000078952	ENSMUSG00000028488	Sh3gl2	0.491141	2e-06	1.99e-05
Guttman_lincRNA_516_._Ensembl_ENSMUSG00000086454_._Necsulea_ENSMUSG00000086454	ENSMUSG00000022962	Gart	0.491096	2e-06	1.99e-05
Guttman_lincRNA_1716_._Ensembl_ENSMUSG00000074303	ENSMUSG00000026600	Soat1	-0.491094	2e-06	1.99e-05
Guttman_lincRNA_1447	ENSMUSG00000061062	Gm10093	0.491062	2e-06	1.99e-05
Guttman_lincRNA_516_._Ensembl_ENSMUSG00000086454_._Necsulea_ENSMUSG00000086454	ENSMUSG00000021048	Mthfd1	0.490986	2e-06	1.99e-05
Guttman_lincRNA_2551_._Ensembl_ENSMUSG00000078952	ENSMUSG00000056758	Hmga2	-0.490951	2e-06	1.99e-05
Guttman_lincRNA_1716_._Ensembl_ENSMUSG00000074303	ENSMUSG00000025364	Pa2g4	0.490847	2e-06	1.99e-05
Guttman_lincRNA_2280_._Necsulea_CUFF.231493	ENSMUSG00000018377	Vezf1	-0.490844	2e-06	1.99e-05
Guttman_lincRNA_1716_._Ensembl_ENSMUSG00000074303	ENSMUSG00000023393	Slc17a9	0.49084	2e-06	1.99e-05
Guttman_lincRNA_1447	ENSMUSG00000017453	Pipox	0.490719	2e-06	1.99e-05
Ensembl_ENSMUSG00000000031_._Ensembl_ENSMUSG00000099143_._Ensembl_ENSMUSG00000098816	ENSMUSG00000020424	Gatsl3	-0.490696	2e-06	1.99e-05
Guttman_lincRNA_1716_._Ensembl_ENSMUSG00000074303	ENSMUSG00000004631	Sgce	-0.490588	2e-06	1.99e-05
Necsulea_Locus_99471_._Guttman_lincRNA_674_._Ensembl_ENSMUSG00000097639	ENSMUSG00000085795	Zfp703	-0.49058	2e-06	1.99e-05
Guttman_lincRNA_2551_._Ensembl_ENSMUSG00000078952	ENSMUSG00000001300	Efnb2	-0.490544	2e-06	1.99e-05
Guttman_lincRNA_1447	ENSMUSG00000074867	Zfp808	0.4905	2e-06	1.99e-05
Guttman_lincRNA_516_._Ensembl_ENSMUSG00000086454_._Necsulea_ENSMUSG00000086454	ENSMUSG00000000708	Kat2b	0.49036	2e-06	1.99e-05
Ensembl_ENSMUSG00000000031_._Ensembl_ENSMUSG00000099143_._Ensembl_ENSMUSG00000098816	ENSMUSG00000068245	Phf11d	-0.490315	2e-06	1.99e-05
Guttman_lincRNA_1716_._Ensembl_ENSMUSG00000074303	ENSMUSG00000016319	Slc25a5	0.490315	2e-06	1.99e-05
Guttman_lincRNA_1447	ENSMUSG00000003849	Nqo1	0.490276	2e-06	1.99e-05
Guttman_lincRNA_2551_._Ensembl_ENSMUSG00000078952	ENSMUSG00000039081	Zfp503	-0.490238	2e-06	1.99e-05
Guttman_lincRNA_1716_._Ensembl_ENSMUSG00000074303	ENSMUSG00000021696	Elovl7	0.490181	2e-06	1.99e-05
Guttman_lincRNA_516_._Ensembl_ENSMUSG00000086454_._Necsulea_ENSMUSG00000086454	ENSMUSG00000020027	Socs2	0.490179	2e-06	1.99e-05
Guttman_lincRNA_2280_._Necsulea_CUFF.231493	ENSMUSG00000055401	Fbxo6	0.490168	2e-06	1.99e-05
Guttman_lincRNA_1716_._Ensembl_ENSMUSG00000074303	ENSMUSG00000056366	Fabp3-ps1	0.490145	2e-06	1.99e-05
Guttman_lincRNA_2551_._Ensembl_ENSMUSG00000078952	ENSMUSG00000015354	Pcolce2	0.490143	2e-06	1.99e-05
Guttman_lincRNA_1447	ENSMUSG00000081037	Gm13929	0.490127	2e-06	1.99e-05
Guttman_lincRNA_1447	ENSMUSG00000005566	Trim28	0.490079	2e-06	1.99e-05
Guttman_lincRNA_2280_._Necsulea_CUFF.231493	ENSMUSG00000031379	Pir	0.489977	2e-06	1.99e-05
Guttman_lincRNA_2551_._Ensembl_ENSMUSG00000078952	ENSMUSG00000021360	Gcnt2	0.489968	2e-06	1.99e-05
Guttman_lincRNA_516_._Ensembl_ENSMUSG00000086454_._Necsulea_ENSMUSG00000086454	ENSMUSG00000031503	Col4a2	-0.489953	2e-06	1.99e-05
Guttman_lincRNA_1447	ENSMUSG00000038692	Hoxb4	-0.489947	2e-06	1.99e-05
Guttman_lincRNA_2551_._Ensembl_ENSMUSG00000078952	ENSMUSG00000020674	Pxdn	-0.489913	2e-06	1.99e-05
Guttman_lincRNA_516_._Ensembl_ENSMUSG00000086454_._Necsulea_ENSMUSG00000086454	ENSMUSG00000025357	Dgka	0.489879	2e-06	1.99e-05
Guttman_lincRNA_2280_._Necsulea_CUFF.231493	ENSMUSG00000024421	Lama3	0.489871	2e-06	1.99e-05
Guttman_lincRNA_2485	ENSMUSG00000068323	Slc4a5	0.489869	2e-06	1.99e-05
Guttman_lincRNA_1447	ENSMUSG00000022849	Hspbap1	0.489816	2e-06	1.99e-05
Guttman_lincRNA_2653	ENSMUSG00000040785	Ttc3	0.489734	2e-06	1.99e-05
Guttman_lincRNA_2653	ENSMUSG00000067919	Rex2	-0.489702	2e-06	1.99e-05
Ensembl_ENSMUSG00000000031_._Ensembl_ENSMUSG00000099143_._Ensembl_ENSMUSG00000098816	ENSMUSG00000033306	Lpp	0.489578	2e-06	1.99e-05
Guttman_lincRNA_1716_._Ensembl_ENSMUSG00000074303	ENSMUSG00000031584	Gsr	0.489572	2e-06	1.99e-05
Guttman_lincRNA_2174	ENSMUSG00000027077	Smtnl1	0.489562	2e-06	1.99e-05
Guttman_lincRNA_2485	ENSMUSG00000038515	Grtp1	0.489512	2e-06	1.99e-05
Necsulea_Locus_99471_._Guttman_lincRNA_674_._Ensembl_ENSMUSG00000097639	ENSMUSG00000005566	Trim28	0.489475	2e-06	1.99e-05
Guttman_lincRNA_2551_._Ensembl_ENSMUSG00000078952	ENSMUSG00000036667	Fam115a	-0.489447	2e-06	1.99e-05
Guttman_lincRNA_2174	ENSMUSG00000029267	Mtf2	0.489407	2e-06	1.99e-05
Guttman_lincRNA_516_._Ensembl_ENSMUSG00000086454_._Necsulea_ENSMUSG00000086454	ENSMUSG00000022114	Spry2	0.4894	2e-06	1.99e-05
Necsulea_Locus_99471_._Guttman_lincRNA_674_._Ensembl_ENSMUSG00000097639	ENSMUSG00000018411	Mapt	0.489385	2e-06	1.99e-05
Guttman_lincRNA_1716_._Ensembl_ENSMUSG00000074303	ENSMUSG00000052397	Ezr	0.489381	2e-06	1.99e-05
Guttman_lincRNA_2551_._Ensembl_ENSMUSG00000078952	ENSMUSG00000033386	Frrs1	0.48932	2e-06	1.99e-05
Guttman_lincRNA_1447	ENSMUSG00000022048	Dpysl2	-0.489278	2e-06	1.99e-05
Guttman_lincRNA_516_._Ensembl_ENSMUSG00000086454_._Necsulea_ENSMUSG00000086454	ENSMUSG00000002845	Tmem39a	0.489276	2e-06	1.99e-05
Guttman_lincRNA_2551_._Ensembl_ENSMUSG00000078952	ENSMUSG00000022106	Rcbtb2	-0.489214	2e-06	1.99e-05
Guttman_lincRNA_2280_._Necsulea_CUFF.231493	ENSMUSG00000029913	Prdm5	0.48919	2e-06	1.99e-05
Ensembl_ENSMUSG00000000031_._Ensembl_ENSMUSG00000099143_._Ensembl_ENSMUSG00000098816	ENSMUSG00000037188	Grhl3	-0.489141	2e-06	1.99e-05
Guttman_lincRNA_2485	ENSMUSG00000048087	Gm4737	0.489127	2e-06	1.99e-05
Guttman_lincRNA_1716_._Ensembl_ENSMUSG00000074303	ENSMUSG00000061544	Zfp229	0.489108	2e-06	1.99e-05
Necsulea_Locus_99471_._Guttman_lincRNA_674_._Ensembl_ENSMUSG00000097639	ENSMUSG00000031379	Pir	0.48887	2e-06	1.99e-05
Ensembl_ENSMUSG00000000031_._Ensembl_ENSMUSG00000099143_._Ensembl_ENSMUSG00000098816	ENSMUSG00000052102	Gnpda1	-0.488826	2e-06	1.99e-05
Guttman_lincRNA_2551_._Ensembl_ENSMUSG00000078952	ENSMUSG00000029860	Zyx	-0.488824	2e-06	1.99e-05
Guttman_lincRNA_2280_._Necsulea_CUFF.231493	ENSMUSG00000021760	Gpx8	-0.488789	2e-06	1.99e-05
Guttman_lincRNA_2280_._Necsulea_CUFF.231493	ENSMUSG00000028926	Cdk14	-0.488719	2e-06	1.99e-05
Guttman_lincRNA_1447	ENSMUSG00000031432	Prps1	0.488713	2e-06	1.99e-05
Guttman_lincRNA_542_._Ensembl_ENSMUSG00000084762_._Necsulea_ENSMUSG00000084762	ENSMUSG00000044224	Dnajc21	0.488636	2e-06	1.99e-05
Guttman_lincRNA_2280_._Necsulea_CUFF.231493	ENSMUSG00000018796	Acsl1	0.48858	2e-06	1.99e-05
Ensembl_ENSMUSG00000092349	ENSMUSG00000026219	Trip12	0.488452	2e-06	1.99e-05
Guttman_lincRNA_2280_._Necsulea_CUFF.231493	ENSMUSG00000035834	Polr3g	0.488415	2e-06	1.99e-05
Guttman_lincRNA_516_._Ensembl_ENSMUSG00000086454_._Necsulea_ENSMUSG00000086454	ENSMUSG00000034158	Lrrc58	-0.488364	2e-06	1.99e-05
Guttman_lincRNA_1447	ENSMUSG00000076431	Sox4	-0.488142	2e-06	1.99e-05
Guttman_lincRNA_2551_._Ensembl_ENSMUSG00000078952	ENSMUSG00000032224	Fam81a	0.488113	2e-06	1.99e-05
Ensembl_ENSMUSG00000000031_._Ensembl_ENSMUSG00000099143_._Ensembl_ENSMUSG00000098816	ENSMUSG00000033826	Dnah8	-0.487905	2e-06	1.99e-05
Guttman_lincRNA_2280_._Necsulea_CUFF.231493	Necsulea_Locus_27300_._Guttman_lincRNA_3508		0.487895	2e-06	1.99e-05
Guttman_lincRNA_516_._Ensembl_ENSMUSG00000086454_._Necsulea_ENSMUSG00000086454	ENSMUSG00000029922	Mkrn1	0.487649	2e-06	1.99e-05
Guttman_lincRNA_1447	ENSMUSG00000056366	Fabp3-ps1	0.487601	2e-06	1.99e-05
Guttman_lincRNA_2280_._Necsulea_CUFF.231493	ENSMUSG00000054662	Ano9	0.487582	2e-06	1.99e-05
Ensembl_ENSMUSG00000000031_._Ensembl_ENSMUSG00000099143_._Ensembl_ENSMUSG00000098816	ENSMUSG00000073403	Gm10499	-0.487508	2e-06	1.99e-05
Guttman_lincRNA_2454	ENSMUSG00000074653	Lrrc31	0.487482	2e-06	1.99e-05
Guttman_lincRNA_1716_._Ensembl_ENSMUSG00000074303	ENSMUSG00000028587	Orc1	0.487471	2e-06	1.99e-05
Guttman_lincRNA_2551_._Ensembl_ENSMUSG00000078952	ENSMUSG00000054662	Ano9	0.487447	2e-06	1.99e-05
Guttman_lincRNA_2454	ENSMUSG00000041859	Mcm3	0.487429	2e-06	1.99e-05
Ensembl_ENSMUSG00000000031_._Ensembl_ENSMUSG00000099143_._Ensembl_ENSMUSG00000098816	ENSMUSG00000079471	Gm7325	-0.487383	2e-06	1.99e-05
Guttman_lincRNA_2485	ENSMUSG00000031651	Triml1	0.487339	2e-06	1.99e-05
Ensembl_ENSMUSG00000000031_._Ensembl_ENSMUSG00000099143_._Ensembl_ENSMUSG00000098816	ENSMUSG00000031765	Mt1	-0.48726	2e-06	1.99e-05
Ensembl_ENSMUSG00000092349	ENSMUSG00000033047	Eif3l	0.487252	2e-06	1.99e-05
Guttman_lincRNA_2653	ENSMUSG00000095661	Gm8935	-0.487191	2e-06	1.99e-05
Guttman_lincRNA_2454	ENSMUSG00000062908	Acadm	0.487182	2e-06	1.99e-05
Guttman_lincRNA_2485	ENSMUSG00000037405	Icam1	0.487122	2e-06	1.99e-05
Ensembl_ENSMUSG00000000031_._Ensembl_ENSMUSG00000099143_._Ensembl_ENSMUSG00000098816	ENSMUSG00000034714	Ttyh2	-0.487085	2e-06	1.99e-05
Ensembl_ENSMUSG00000000031_._Ensembl_ENSMUSG00000099143_._Ensembl_ENSMUSG00000098816	ENSMUSG00000030826	Bcat2	-0.486992	2e-06	1.99e-05
Ensembl_ENSMUSG00000000031_._Ensembl_ENSMUSG00000099143_._Ensembl_ENSMUSG00000098816	ENSMUSG00000039081	Zfp503	0.486968	2e-06	1.99e-05
Guttman_lincRNA_1447	ENSMUSG00000031403	Dkc1	0.486945	2e-06	1.99e-05
Ensembl_ENSMUSG00000000031_._Ensembl_ENSMUSG00000099143_._Ensembl_ENSMUSG00000098816	ENSMUSG00000021196	Pfkp	-0.486864	2e-06	1.99e-05
Ensembl_ENSMUSG00000000031_._Ensembl_ENSMUSG00000099143_._Ensembl_ENSMUSG00000098816	ENSMUSG00000029249	Rest	-0.486861	2e-06	1.99e-05
Guttman_lincRNA_1447	ENSMUSG00000028773	Fabp3	0.486853	2e-06	1.99e-05
Guttman_lincRNA_1716_._Ensembl_ENSMUSG00000074303	ENSMUSG00000001918	Slc1a5	0.486739	2e-06	1.99e-05
Guttman_lincRNA_2485	ENSMUSG00000039145	Camk1d	0.486701	2e-06	1.99e-05
Guttman_lincRNA_2174	ENSMUSG00000020899	Pfas	0.486604	2e-06	1.99e-05
Ensembl_ENSMUSG00000092349	ENSMUSG00000044224	Dnajc21	0.486552	2e-06	1.99e-05
Guttman_lincRNA_516_._Ensembl_ENSMUSG00000086454_._Necsulea_ENSMUSG00000086454	ENSMUSG00000003051	Elf3	0.486504	2e-06	1.99e-05
Ensembl_ENSMUSG00000000031_._Ensembl_ENSMUSG00000099143_._Ensembl_ENSMUSG00000098816	ENSMUSG00000056758	Hmga2	0.486491	2e-06	1.99e-05
Guttman_lincRNA_1447	ENSMUSG00000021767	Kat6b	0.486416	2e-06	1.99e-05
Ensembl_ENSMUSG00000000031_._Ensembl_ENSMUSG00000099143_._Ensembl_ENSMUSG00000098816	ENSMUSG00000023942	Slc29a1	-0.486389	2e-06	1.99e-05
Necsulea_Locus_22428_._Guttman_lincRNA_2851_._Necsulea_Locus_21016	ENSMUSG00000075394	Hoxc4	-0.486361	2e-06	1.99e-05
Necsulea_Locus_22428_._Guttman_lincRNA_2851_._Necsulea_Locus_21016	ENSMUSG00000090744	Gm6871	0.486348	2e-06	1.99e-05
Guttman_lincRNA_1716_._Ensembl_ENSMUSG00000074303	ENSMUSG00000022710	Usp7	0.486346	2e-06	1.99e-05
Guttman_lincRNA_2551_._Ensembl_ENSMUSG00000078952	ENSMUSG00000034205	Loxl2	-0.486332	2e-06	1.99e-05
Ensembl_ENSMUSG00000000031_._Ensembl_ENSMUSG00000099143_._Ensembl_ENSMUSG00000098816	ENSMUSG00000042414	Prdm14	-0.48632	2e-06	1.99e-05
Ensembl_ENSMUSG00000000031_._Ensembl_ENSMUSG00000099143_._Ensembl_ENSMUSG00000098816	ENSMUSG00000032366	Tpm1	0.486296	2e-06	1.99e-05
Guttman_lincRNA_2551_._Ensembl_ENSMUSG00000078952	ENSMUSG00000063415	Cyp26b1	-0.486264	2e-06	1.99e-05
Guttman_lincRNA_1394_._Necsulea_Locus_93819_._Necsulea_Locus_92889_._Guttman_lincRNA_1395_._Necsulea_Locus_92697	Guttman_lincRNA_1365		0.486251	2e-06	1.99e-05
Ensembl_ENSMUSG00000000031_._Ensembl_ENSMUSG00000099143_._Ensembl_ENSMUSG00000098816	ENSMUSG00000022962	Gart	-0.486219	2e-06	1.99e-05
Guttman_lincRNA_1716_._Ensembl_ENSMUSG00000074303	ENSMUSG00000033022	Cdo1	0.486189	2e-06	1.99e-05
Guttman_lincRNA_1447	ENSMUSG00000042751	Nmnat2	0.486187	2e-06	1.99e-05
Guttman_lincRNA_2454	ENSMUSG00000055102	Zfp819	0.486164	2e-06	1.99e-05
Guttman_lincRNA_516_._Ensembl_ENSMUSG00000086454_._Necsulea_ENSMUSG00000086454	ENSMUSG00000024421	Lama3	0.486046	2e-06	1.99e-05
Guttman_lincRNA_1447	ENSMUSG00000095193	Gm20939	0.486012	2e-06	1.99e-05
Guttman_lincRNA_2174	ENSMUSG00000064194	Zfp936	0.48597	2e-06	1.99e-05
Guttman_lincRNA_516_._Ensembl_ENSMUSG00000086454_._Necsulea_ENSMUSG00000086454	ENSMUSG00000020534	Shmt1	0.485962	2e-06	1.99e-05
Ensembl_ENSMUSG00000000031_._Ensembl_ENSMUSG00000099143_._Ensembl_ENSMUSG00000098816	ENSMUSG00000028109	Hormad1	-0.485795	2e-06	1.99e-05
Guttman_lincRNA_2551_._Ensembl_ENSMUSG00000078952	ENSMUSG00000025001	Hells	0.48565	2e-06	1.99e-05
Guttman_lincRNA_1447	ENSMUSG00000018411	Mapt	0.485648	2e-06	1.99e-05
Guttman_lincRNA_1447	ENSMUSG00000092335	Gm7221	0.485604	2e-06	1.99e-05
Ensembl_ENSMUSG00000000031_._Ensembl_ENSMUSG00000099143_._Ensembl_ENSMUSG00000098816	ENSMUSG00000029267	Mtf2	-0.485569	2e-06	1.99e-05
Ensembl_ENSMUSG00000000031_._Ensembl_ENSMUSG00000099143_._Ensembl_ENSMUSG00000098816	ENSMUSG00000032999	Nlrp4f	-0.485543	2e-06	1.99e-05
Guttman_lincRNA_542_._Ensembl_ENSMUSG00000084762_._Necsulea_ENSMUSG00000084762	ENSMUSG00000038700	Hoxb5	-0.48541	2e-06	1.99e-05
Guttman_lincRNA_516_._Ensembl_ENSMUSG00000086454_._Necsulea_ENSMUSG00000086454	ENSMUSG00000020173	Cobl	0.485327	2e-06	1.99e-05
Guttman_lincRNA_1447	ENSMUSG00000046402	Rbp1	-0.485248	2e-06	1.99e-05
Ensembl_ENSMUSG00000000031_._Ensembl_ENSMUSG00000099143_._Ensembl_ENSMUSG00000098816	ENSMUSG00000004631	Sgce	0.485243	2e-06	1.99e-05
Guttman_lincRNA_2454	ENSMUSG00000018882	Mrpl45	0.485141	2e-06	1.99e-05
Guttman_lincRNA_2551_._Ensembl_ENSMUSG00000078952	ENSMUSG00000033837	Foxh1	0.485122	2e-06	1.99e-05
Guttman_lincRNA_2551_._Ensembl_ENSMUSG00000078952	ENSMUSG00000033446	Lpar6	-0.48511	2e-06	1.99e-05
Guttman_lincRNA_516_._Ensembl_ENSMUSG00000086454_._Necsulea_ENSMUSG00000086454	ENSMUSG00000002227	Mov10	0.485058	2e-06	1.99e-05
Guttman_lincRNA_2551_._Ensembl_ENSMUSG00000078952	ENSMUSG00000001131	Timp1	0.485009	2e-06	1.99e-05
Guttman_lincRNA_2174	ENSMUSG00000031490	Eif4ebp1	0.485005	2e-06	1.99e-05
Guttman_lincRNA_516_._Ensembl_ENSMUSG00000086454_._Necsulea_ENSMUSG00000086454	ENSMUSG00000025726	Slc28a1	0.484988	2e-06	1.99e-05
Guttman_lincRNA_1716_._Ensembl_ENSMUSG00000074303	ENSMUSG00000028773	Fabp3	0.484982	2e-06	1.99e-05
Guttman_lincRNA_1716_._Ensembl_ENSMUSG00000074303	ENSMUSG00000020717	Pecam1	0.484975	2e-06	1.99e-05
Guttman_lincRNA_1716_._Ensembl_ENSMUSG00000074303	ENSMUSG00000027684	Mecom	-0.484953	2e-06	1.99e-05
Guttman_lincRNA_2551_._Ensembl_ENSMUSG00000078952	ENSMUSG00000029512	Ulk1	0.484848	2e-06	1.99e-05
Ensembl_ENSMUSG00000000031_._Ensembl_ENSMUSG00000099143_._Ensembl_ENSMUSG00000098816	ENSMUSG00000024598	Fbn2	0.4848	2e-06	1.99e-05
Guttman_lincRNA_516_._Ensembl_ENSMUSG00000086454_._Necsulea_ENSMUSG00000086454	ENSMUSG00000022849	Hspbap1	0.484783	2e-06	1.99e-05
Guttman_lincRNA_2551_._Ensembl_ENSMUSG00000078952	ENSMUSG00000040354	Mars	0.484727	2e-06	1.99e-05
Guttman_lincRNA_2454	ENSMUSG00000004187	Kifc2	0.484646	2e-06	1.99e-05
Ensembl_ENSMUSG00000000031_._Ensembl_ENSMUSG00000099143_._Ensembl_ENSMUSG00000098816	ENSMUSG00000018377	Vezf1	0.484636	2e-06	1.99e-05
Guttman_lincRNA_1447	ENSMUSG00000024180	Tmem8	0.484577	2e-06	1.99e-05
Guttman_lincRNA_516_._Ensembl_ENSMUSG00000086454_._Necsulea_ENSMUSG00000086454	ENSMUSG00000067377	Tspan6	-0.48455	2e-06	1.99e-05
Ensembl_ENSMUSG00000000031_._Ensembl_ENSMUSG00000099143_._Ensembl_ENSMUSG00000098816	ENSMUSG00000069171	Nr2f1	0.484535	2e-06	1.99e-05
Necsulea_Locus_99471_._Guttman_lincRNA_674_._Ensembl_ENSMUSG00000097639	ENSMUSG00000048087	Gm4737	0.484482	2e-06	1.99e-05
Guttman_lincRNA_2280_._Necsulea_CUFF.231493	ENSMUSG00000026496	Parp1	0.484474	2e-06	1.99e-05
Guttman_lincRNA_542_._Ensembl_ENSMUSG00000084762_._Necsulea_ENSMUSG00000084762	ENSMUSG00000060591	Ifitm2	0.48442	2e-06	1.99e-05
Guttman_lincRNA_1716_._Ensembl_ENSMUSG00000074303	ENSMUSG00000031651	Triml1	0.484406	2e-06	1.99e-05
Guttman_lincRNA_516_._Ensembl_ENSMUSG00000086454_._Necsulea_ENSMUSG00000086454	ENSMUSG00000038700	Hoxb5	-0.484319	2e-06	1.99e-05
Guttman_lincRNA_2551_._Ensembl_ENSMUSG00000078952	ENSMUSG00000038151	Prdm1	0.48428	2e-06	1.99e-05
Guttman_lincRNA_2032	ENSMUSG00000054766	Set	0.484259	2e-06	1.99e-05
Ensembl_ENSMUSG00000000031_._Ensembl_ENSMUSG00000099143_._Ensembl_ENSMUSG00000098816	ENSMUSG00000024359	Hspa9	-0.484215	2e-06	1.99e-05
Guttman_lincRNA_1447	ENSMUSG00000024359	Hspa9	0.48402	2e-06	1.99e-05
Ensembl_ENSMUSG00000000031_._Ensembl_ENSMUSG00000099143_._Ensembl_ENSMUSG00000098816	ENSMUSG00000027018	Hat1	-0.484011	2e-06	1.99e-05
Necsulea_Locus_99471_._Guttman_lincRNA_674_._Ensembl_ENSMUSG00000097639	ENSMUSG00000023150	Ivns1abp	-0.483992	2e-06	1.99e-05
Guttman_lincRNA_2551_._Ensembl_ENSMUSG00000078952	ENSMUSG00000063354	Slc39a4	0.48392	2e-06	1.99e-05
Necsulea_Locus_99471_._Guttman_lincRNA_674_._Ensembl_ENSMUSG00000097639	ENSMUSG00000000275	Trim25	0.48391	2e-06	1.99e-05
Guttman_lincRNA_1716_._Ensembl_ENSMUSG00000074303	ENSMUSG00000026483	Fam129a	0.483867	2e-06	1.99e-05
Guttman_lincRNA_516_._Ensembl_ENSMUSG00000086454_._Necsulea_ENSMUSG00000086454	ENSMUSG00000074653	Lrrc31	0.483802	2e-06	1.99e-05
Ensembl_ENSMUSG00000000031_._Ensembl_ENSMUSG00000099143_._Ensembl_ENSMUSG00000098816	ENSMUSG00000058571	Gpc6	0.48375	2e-06	1.99e-05
Guttman_lincRNA_516_._Ensembl_ENSMUSG00000086454_._Necsulea_ENSMUSG00000086454	ENSMUSG00000025423	Pias2	0.483748	2e-06	1.99e-05
Guttman_lincRNA_2551_._Ensembl_ENSMUSG00000078952	ENSMUSG00000022221	Ripk3	0.483676	2e-06	1.99e-05
Guttman_lincRNA_2280_._Necsulea_CUFF.231493	ENSMUSG00000032394	Igdcc3	-0.483628	2e-06	1.99e-05
Guttman_lincRNA_2280_._Necsulea_CUFF.231493	ENSMUSG00000044681	Cnpy1	0.483571	2e-06	1.99e-05
Guttman_lincRNA_2551_._Ensembl_ENSMUSG00000078952	ENSMUSG00000037405	Icam1	0.483386	2e-06	1.99e-05
Guttman_lincRNA_2280_._Necsulea_CUFF.231493	ENSMUSG00000024006	Stk38	0.483376	2e-06	1.99e-05
Guttman_lincRNA_2280_._Necsulea_CUFF.231493	ENSMUSG00000063354	Slc39a4	0.483263	2e-06	1.99e-05
Guttman_lincRNA_516_._Ensembl_ENSMUSG00000086454_._Necsulea_ENSMUSG00000086454	ENSMUSG00000026483	Fam129a	0.483189	2e-06	1.99e-05
Guttman_lincRNA_2551_._Ensembl_ENSMUSG00000078952	ENSMUSG00000060147	Serpinb6a	0.48315	2e-06	1.99e-05
Ensembl_ENSMUSG00000000031_._Ensembl_ENSMUSG00000099143_._Ensembl_ENSMUSG00000098816	ENSMUSG00000055373	Fut9	-0.483077	2e-06	1.99e-05
Guttman_lincRNA_2551_._Ensembl_ENSMUSG00000078952	ENSMUSG00000027452	Acss1	0.482971	2e-06	1.99e-05
Necsulea_Locus_99471_._Guttman_lincRNA_674_._Ensembl_ENSMUSG00000097639	ENSMUSG00000025190	Got1	0.482937	2e-06	1.99e-05
Necsulea_Locus_22428_._Guttman_lincRNA_2851_._Necsulea_Locus_21016	ENSMUSG00000025364	Pa2g4	0.482928	2e-06	1.99e-05
Guttman_lincRNA_2551_._Ensembl_ENSMUSG00000078952	ENSMUSG00000026245	Farsb	0.482882	2e-06	1.99e-05
Guttman_lincRNA_1447	ENSMUSG00000031584	Gsr	0.482784	2e-06	1.99e-05
Ensembl_ENSMUSG00000074918	ENSMUSG00000078497	Gm13145	-0.482773	2e-06	1.99e-05
Guttman_lincRNA_2280_._Necsulea_CUFF.231493	Ensembl_ENSMUSG00000092349		0.482741	2e-06	1.99e-05
Guttman_lincRNA_1447	ENSMUSG00000051747	Ttn	0.482723	2e-06	1.99e-05
[truncated: 59,142 more rows]
