# Supplementary material for: Distinctive features of lincRNA gene expression suggest widespread RNA-independent functions
Source: Life Sci Alliance. 2018 Jul 31;1(4):e201800124. doi: 10.26508/lsa.201800124 (PMC6238598; doi:10.26508/lsa.201800124)
Supplement: Supplementary file 4 [file LSA-2018-00124_TableS4.xlsx]

## Sheet: Table S4A cell lines used
Table S4A. List of mES cell lines used in this study
		Genotypes:
		- = genomic deletion
		HHRz = ribozyme integration
		HHRz* = inactive point mutant ribozyme integration
cMB number	Genotype (chronological order of editing)		Source	Name given to cell lines for analysis (including clone number)	DESeq2 group
cMB366	mES159		This study	Clpp-13-4B	control
cMB243	mES159	DGCR8HHRz/HHRz	This study	DGCR8-23-2F	control
cMB244	mES159	DGCR8HHRz/HHRz	This study	DGCR8-23-5E	control
cMB245	mES159	DGCR8HHRz/HHRz	This study	DGCR8-23-6F	control
cMB367	mES159	FirreHHRz/HHRz	This study	Firre-5-1B (site 1)	control
cMB368	mES159	FirreHHRz/HHRz	This study	Firre-5-2E (site 1)	control
cMB369	mES159	FirreHHRz/HHRz	This study	Firre-5-5B (site 1)	control
cMB370	mES159	FirreHHRz/HHRz	This study	Firre-5-5G (site 1)	control
cMB219	mES159	Firre-	This study	Firre-5del-2A	Firre_delta
cMB220	mES159	Firre-	This study	Firre-5del-2C	Firre_delta
cMB221	mES159	Firre-	This study	Firre-5del-3A	Firre_delta
cMB222	mES159	Firre-	This study	Firre-5del-3C	Firre_delta
cMB239	mES159	G9aHHRz/HHRz	This study	G9a-22-2B	G9a_Rz
cMB240	mES159	G9aHHRz/HHRz	This study	G9a-22-2C	G9a_Rz
cMB241	mES159	G9aHHRz/HHRz	This study	G9a-22-2H	G9a_Rz
cMB242	mES159	G9aHHRz/HHRz	This study	G9a-22-3C	G9a_Rz
cMB114	mES159	linc1251HHRz/HHRz	This study	linc1251-1-1B	control
cMB115	mES159	linc1251HHRz/HHRz	This study	linc1251-1-2B	control
cMB116	mES159	linc1251HHRz/HHRz	This study	linc1251-1-5D	control
cMB117	mES159	linc1251HHRz*/HHRz*	This study	linc1251-1mut-1A	control
cMB121	mES159	linc1251HHRz*/HHRz*	This study	linc1251-1mut-2F	control
cMB122	mES159	linc1251HHRz*/HHRz*	This study	linc1251-1mut-3D	control
cMB150	mES159	linc1296HHRz/HHRz	This study	linc1296-6-11E	control
cMB125	mES159	linc1296HHRz/HHRz	This study	linc1296-6-2C	control
cMB126	mES159	linc1296HHRz/HHRz	This study	linc1296-6-2G	control
cMB146	mES159	linc1296HHRz/HHRz	This study	linc1296-6-3B	control
cMB127	mES159	linc1296HHRz/HHRz	This study	linc1296-6-3C	control
cMB147	mES159	linc1296HHRz/HHRz	This study	linc1296-6-4C	control
cMB148	mES159	linc1296HHRz/HHRz	This study	linc1296-6-4D	control
cMB149	mES159	linc1296HHRz/HHRz	This study	linc1296-6-5F	control
cMB231	mES159	linc1296-/-	This study	linc1296-6del-2B	linc1296_delta
cMB232	mES159	linc1296-/-	This study	linc1296-6del-2E	linc1296_delta
cMB234	mES159	linc1296-/-	This study	linc1296-6del-2H	control
cMB166	mES159	linc1296HHRz*/HHRz*	This study	linc1296-6mut-1D	control
cMB167	mES159	linc1296HHRz*/HHRz*	This study	linc1296-6mut-5A	control
cMB168	mES159	linc1296HHRz*/HHRz*	This study	linc1296-6mut-5F	control
cMB169	mES159	linc1296HHRz*/HHRz*	This study	linc1296-6mut-6A	control
cMB170	mES159	linc1296HHRz*/HHRz*	This study	linc1296-6mut-6D	control
cMB171	mES159	linc1296HHRz*/HHRz*	This study	linc1296-6mut-6E	control
cMB175	mES159	linc1333HHRz/HHRz	This study	linc1333-17-1F	control
cMB213	mES159	linc1333HHRz/HHRz	This study	linc1333-17-3E	linc1333_Rz
cMB214	mES159	linc1333HHRz/HHRz	This study	linc1333-17-4E	linc1333_Rz
cMB176	mES159	linc1333HHRz/HHRz	This study	linc1333-17-6E	linc1333_Rz
cMB164	mES159	linc1333HHRz/HHRz	This study	linc1333-17-6H	linc1333_Rz
cMB145	mES159	linc1400HHRz/HHRz	This study	linc1400-4-11B	control
cMB138	mES159	linc1400HHRz/HHRz	This study	linc1400-4-1B	control
cMB139	mES159	linc1400HHRz/HHRz	This study	linc1400-4-1H	control
No stock	mES159	linc1400HHRz/HHRz	This study	linc1400-4-3D	control
cMB120	mES159	linc1400HHRz/HHRz	This study	linc1400-4-4C	control
cMB140	mES159	linc1400HHRz/HHRz	This study	linc1400-4-6B	control
cMB141	mES159	linc1400HHRz/HHRz	This study	linc1400-4-7C	control
cMB142	mES159	linc1400HHRz/HHRz	This study	linc1400-4-7D	control
cMB215	mES159	linc1400-/-	This study	linc1400-4del-1B	linc1400_delta
cMB216	mES159	linc1400-/-	This study	linc1400-4del-1G	linc1400_delta
cMB217	mES159	linc1400-/-	This study	linc1400-4del-2A	linc1400_delta
cMB124	mES159	linc1400HHRz*/HHRz*	This study	linc1400-4mut-3A	control
cMB131	mES159	linc1400HHRz*/HHRz*	This study	linc1400-4mut-3E	control
cMB165	mES159	linc1400HHRz*/HHRz*	This study	linc1400-4mut-6D	control
cMB154	mES159	linc1405HHRz/HHRz	This study	linc1405-9-2D	linc1405_Rz
cMB371	mES159	linc1405HHRz/HHRz	This study	linc1405-9-3D	control
cMB172	mES159	linc1405HHRz/HHRz	This study	linc1405-9-5A	linc1405_Rz
cMB173	mES159	linc1405HHRz/HHRz	This study	linc1405-9-5D	linc1405_Rz
cMB174	mES159	linc1405HHRz/HHRz	This study	linc1405-9-5E	linc1405_Rz
cMB199	mES159	linc1405-/-	This study	linc1405delta-9del-2A	linc1405_delta
cMB200	mES159	linc1405-/-	This study	linc1405delta-9del-2E	linc1405_delta
cMB201	mES159	linc1405-/-	This study	linc1405delta-9del-3D	linc1405_delta
cMB202	mES159	linc1405-/-	This study	linc1405delta-9del-3F	linc1405_delta
cMB203	mES159	linc1405-/-	This study	linc1405delta-9del-4C	linc1405_delta
cMB204	mES159	linc1405-/-	This study	linc1405delta-9del-5B	linc1405_delta
cMB205	mES159	linc1405-/-	This study	linc1405delta-9del-6G	control
cMB135	mES159	linc1503HHRz/HHRz	This study	linc1503-3-1B	linc1503_Rz
cMB136	mES159	linc1503HHRz/HHRz	This study	linc1503-3-1E	linc1503_Rz
cMB118	mES159	linc1503HHRz/HHRz	This study	linc1503-3-2C	linc1503_Rz
cMB137	mES159	linc1503HHRz/HHRz	This study	linc1503-3-5C	linc1503_Rz
cMB223	mES159	linc1503-/-	This study	linc1503-3del-1C	linc1503_delta
cMB224	mES159	linc1503-/-	This study	linc1503-3del-6C	linc1503_delta
cMB225	mES159	linc1503-/-	This study	linc1503-3del-6D	linc1503_delta
cMB226	mES159	linc1503-/-	This study	linc1503-3del-6G	linc1503_delta
cMB192	mES159	linc1509HHRz/HHRz (site 1)	This study	linc1509Site1-19-1C	linc1509_Rz
cMB193	mES159	linc1509HHRz/HHRz (site 1)	This study	linc1509Site1-19-4E	linc1509_Rz
cMB194	mES159	linc1509HHRz/HHRz (site 1)	This study	linc1509Site1-19-5G	linc1509_Rz
cMB195	mES159	linc1509HHRz/HHRz (site 1)	This study	linc1509Site1-19-6B	linc1509_Rz
cMB196	mES159	linc1509HHRz/HHRz (site 2)	This study	linc1509Site2-19-4E	control
cMB197	mES159	linc1509HHRz/HHRz (site 2)	This study	linc1509Site2-19-5A	linc1509_Rz
cMB198	mES159	linc1509HHRz/HHRz (site 2)	This study	linc1509Site2-19-6E	control
cMB157	mES159	linc1611HHRz/HHRz	This study	linc1611-10-11A	control
cMB158	mES159	linc1611HHRz/HHRz	This study	linc1611-10-12B	linc1611_Rz
cMB159	mES159	linc1611HHRz/HHRz	This study	linc1611-10-12C	linc1611_Rz
cMB160	mES159	linc1611HHRz/HHRz	This study	linc1611-10-12D	control
cMB155	mES159	linc1611HHRz/HHRz	This study	linc1611-10-3H	linc1611_Rz
cMB156	mES159	linc1611HHRz/HHRz	This study	linc1611-10-4H	linc1611_Rz
cMB133	mES159	linc1611HHRz/HHRz	This study	linc1611-10-5E	linc1611_Rz
cMB132	mES159	linc1611HHRz/HHRz	This study	linc1611-10-5G	control
cMB206	mES159	linc1611-/-	This study	linc1611delta-10del-4D	linc1611_delta
cMB208	mES159	linc1611-/-	This study	linc1611delta-10del-4G	linc1611_delta
cMB211	mES159	linc1611-/-	This study	linc1611delta-10del-5H	linc1611_delta
cMB212	mES159	linc1611-/-	This study	linc1611delta-10del-6E	linc1611_delta
cMB161	mES159	lncEnc1HHRz/HHRz	This study	lincEnc1-16-2B	lincEnc1_Rz
cMB162	mES159	lncEnc1HHRz/HHRz	This study	lincEnc1-16-2D	lincEnc1_Rz
cMB163	mES159	lncEnc1HHRz/HHRz	This study	lincEnc1-16-4B	control
cMB227	mES159	lncEnc1-/-	This study	lincEnc1-16del-1D	lincEnc1_delta
cMB228	mES159	lncEnc1-/-	This study	lincEnc1-16del-2D	lincEnc1_delta
cMB229	mES159	lncEnc1-/-	This study	lincEnc1-16del-3C	control
cMB372	mES159		This study	Pcgf6-12-1B	control
cMB373	mES159		This study	Pcgf6-12-2B	control
cMB374	mES159		This study	Pcgf6-12-5B	control
cMB123	mES159	Pvt1HHRz/HHRz (site 1)	This study	Pvt1-2-2E	control
cMB134	mES159	Pvt1HHRz/HHRz (site 1)	This study	Pvt1-2-4H	control
cMB375	mES159	Pvt1HHRz/HHRz (site 1)	This study	Pvt1-2-5A	control
cMB182	mES159	TunaHHRz/HHRz (site 1)	This study	TunaSite1-18-2G	Tuna_Rz
cMB183	mES159	TunaHHRz/HHRz (site 1)	This study	TunaSite1-18-3C	Tuna_Rz
cMB184	mES159	TunaHHRz/HHRz (site 1)	This study	TunaSite1-18-6B	Tuna_Rz
cMB185	mES159	TunaHHRz/HHRz (site 2)	This study	TunaSite2-18-3D	control
CMB037	mES159		This study	WT (used for NET-seq)	control
cMB151	mES159	XLOC_021390HHRz/HHRz	This study	XLOC_021390-7-1C	control
cMB152	mES159	XLOC_021390HHRz/HHRz	This study	XLOC_021390-7-1D	control
cMB128	mES159	XLOC_021390HHRz/HHRz	This study	XLOC_021390-7-5C	control
cMB129	mES159	XLOC_023934HHRz/HHRz	This study	XLOC_023934-8-1E	control
cMB130	mES159	XLOC_023934HHRz/HHRz	This study	XLOC_023934-8-4E	control
cMB153	mES159	XLOC_023934HHRz/HHRz	This study	XLOC_023934-8-9F	control
cMB286	mES159	Pvt1-/-	This study	Pvt1-2del-2A	Pvt1_delta
cMB289	mES159	Pvt1HHRz/HHRz (site 2)	This study	Pvt1-2alt-6F	control
cMB290	mES159	Pvt1HHRz/HHRz (site 2)	This study	Pvt1-2alt-6G	control
cMB292	mES159	linc1543-/-	This study	linc1543-24del-1E	linc1543_delta
cMB293	mES159	linc1543-/-	This study	linc1543-24del-1H	linc1543_delta
cMB294	mES159	linc1543-/-	This study	linc1543-24del-4H	linc1543_delta
cMB296	mES159	linc1543HHRz/HHRz	This study	linc1543-24-2C	linc1543_Rz
cMB297	mES159	linc1543HHRz/HHRz	This study	linc1543-24-3E	linc1543_Rz
cMB299	mES159	Miat-/-	This study	Miat-25del-2C	Miat_delta
cMB301	mES159	Miat-/-	This study	Miat-25del-3G	Miat_delta
cMB302	mES159	Miat-/-	This study	Miat-25del-4A	Miat_delta
cMB305	mES159	Tuna-/-	This study	Tuna-18del-1E	Tuna_delta
cMB307	mES159	Tuna-/-	This study	Tuna-18del-2E	Tuna_delta
cMB308	mES159	Tuna-/-	This study	Tuna-18del-3B	Tuna_delta
cMB309	mES159	7SKHHRz/HHRz	This study	7SK-26-1B	7SK
cMB311	mES159	7SKHHRz/HHRz	This study	7SK-26-6G	7SK
cMB312	mES159	7SKHHRz*/HHRz*	This study	7SK-26mut-2A	7SK
cMB313	mES159	7SKHHRz*/HHRz*	This study	7SK-26mut-4H	7SK
cMB326	mES159		This study	WT-2H	control
cMB327	mES159		This study	WT-2B	control
cMB376	mES159	Rosa26Cre-ERT2/BirA-V5 Mtr41xFlagAvi/1xFlagAvi	This study	Mtr43F CRAC exp16/18/23	control
cMB377	mES159	Rosa26Cre-ERT2/BirA-V5 Mtr43xFlagAvi/3xFlagAvi	This study	Mtr4 CRAC exp16	control
cMB043	BC8		Sun et al 2012	mESCs from C57BL/6J female × Mus musculus castaneus male	control
cMB044	CB9		Sun et al 2012	mESCs from Mus musculus castaneus female x C57BL/6J male	control
cMB341	mES159	G9aHDVAz/HDVAz	This study	G9a HDV Az line	control
cMB333	mES159		This study	Wild-type lines for G9a HDV Az: 1-4B	control
cMB335	mES159		This study	Wild-type lines for G9a HDV Az: 1-5F	control
cMB337	mES159		This study	Wild-type lines for G9a HDV Az: 2-1C	control

## Sheet: Table S4B cas9 guides for delns
Table S4B. Details of lincRNA locus deletions made using CRISPR-Cas9
Target gene	Deleted region size (kb)	Cas9 guide 1	Cas9 guide 2	Region deleted
Firre	77.348	TATTGTCTTAGAGTATCGCG	GTGTGAATGAGAACCACTAT	Entire gene
linc1296	8.68	GTAGTCAGTCAGCTTTGTGT	TGGTTTAGTTTATATCGACT	Entire gene
linc1400	5.376	GGCAGACCTGCGTAATTAGT	TTCACCTTAGACATACATCC	Entire gene
linc1405	9.331	AAAGCTCGGTAGTAAGAGGT	TGGTTCCCCATGTATTCACC	Entire gene
linc1503	3.025	AATGCCACAACAGACTCTAT	TGAAAGTCATTGGTCAAAGT	Entire gene
linc1543	19.299	AAGATTTCTTCCTACCGTAT	TATGGCCTACATCTTGAATC	Entire gene
linc1611	7.101	CCGTTGCACATAGTTCCCAG	TGACTACGATTGACTTACCG	Entire gene
lncEnc1	16.469	TCATGTCAGGGAGAATAGGT	GGCCTACTAGTGAGGGATCA	Entire gene
Miat	17.166	CCCCTACTTAACCCGCTGAC	GGTTTGGGTAGAGTCAACCC	Entire gene
Pvt1	70.354	GTGGGACCTATGTAGGACCT	TCTGAGACTTAGTGTATACC	Exons 1 and 2
Tuna	47.765	ACCAGGTGTCTAGTTTCAGG	CAAACTGTAATTCTGCACAG	Entire gene
