# Supplementary material for: Distinctive features of lincRNA gene expression suggest widespread RNA-independent functions
Source: Life Sci Alliance. 2018 Jul 31;1(4):e201800124. doi: 10.26508/lsa.201800124 (PMC6238598; doi:10.26508/lsa.201800124)
Supplement: Supplementary file 5 [file LSA-2018-00124_TableS5.xlsx]

## Sheet: Sheet1
Oligo name	Oligo sequence
7SK_checking_F1	CGGCTACATAAGGTCACCACATGTG
7SK_checking_F2	GTCACCACATGTGTAAAGTTACAAAATTCTATGGC
7SK_checking_R2	GTTACGACTGCTTGGAACCTTCACC
7SK_HHRz	CAAGCTCTCAAGGTCCATTGTAGGAGAACGTAGGGTAGTCAAGCTTCCACCTGTCACCGGATGTGTTTTCCGGTCTGATGAGTCCGTGAGGACGAAACAGGAGACTCCAGACACATCCAAATGAGGCGCTGCATGTGGCAGTCTGCCTTTC
7SK_HHRz_mutant	CAAGCTCTCAAGGTCCATTGTAGGAGAACGTAGGGTAGTCAAGCTTCCACCTGTCACCGGATGTGTTTTCCGGTCTCATGAGTCCGTGAGGACGAAACAGGAGACTCCAGACACATCCAAATGAGGCGCTGCATGTGGCAGTCTGCCTTTC
7SK_pCas9_F	CACCGTTTGGATGTGTCTGGAGTCT
7SK_pCas9_R	AAACAGACTCCAGACACATCCAAAC
7SK_qPCR_F	GAGGACGACCTTCCCCGAATAGAG
7SK_qPCR_R	TGACTACCCTACGTTCTCCTACAATGGA
Firre_checking_F1	CAGATTCCCAGGGAATCCTCCATTTTCTC
Firre_checking_F2	GTATGCTTCACCTCTCCTGCTAAGTCTTC
Firre_checking_R2	CCTTATCTGTGGCCCACAATTCTAACTTGA
Firre_deletion_checking_F1	GTTTCTTCCCCAACATACAGGCTTGATACT
Firre_deletion_checking_F2	CCTAGACTACTGAGTCCTTGGGTTCTCTC
Firre_deletion_checking_R1	CAGTTTCAACCCGGCCTGTCTTC
Firre_deletion_checking_R2	GCAACCCTAGGGGATCCAGACC
Firre_deletion_pCas9-1_F	CACCGTATTGTCTTAGAGTATCGCG
Firre_deletion_pCas9-1_R	AAACCGCGATACTCTAAGACAATAC
Firre_deletion_pCas9-2_F	CACCGGTGTGAATGAGAACCACTAT
Firre_deletion_pCas9-2_R	AAACATAGTGGTTCTCATTCACACC
Firre_HHRz	ACGGGTTAAATTGGCGATGGGCCAGGCGCTCCTTGAGGATGCTCTAAAGGCCTGTCACCGGATGTGTTTTCCGGTCTGATGAGTCCGTGAGGACGAAACAGGTAAGCCATGGAATGAATGGAGACATTTGAAACAGCTTGTTTCCAAGGTCT
Firre_pCas9_F	CACCGGATGCTCTAAAGGTAAGCCA
Firre_pCas9_R	AAACTGGCTTACCTTTAGAGCATCC
Firre_qPCR_F1	CACCTCTCCTGCTAAGTCTTCATCCC
Firre_qPCR_R1	CTTTAGAGCATCCTCAAGGAGCGC
G9a_checking_F1	CGGTGACCGATTCTGGGACATCAAG
G9a_checking_F2	GGCTCTGAGAAGTGCAAGCATTCAG
G9a_checking_R2	ACTTGCACTCCCAGTGAGAAACCA
G9a_HDVAz_3HA_F	CTCTCCCTTGGCCATCCGAGTGGGCCTCCATCAGAGACCCCAGTAAGGC
G9a_HDVAz_3HA_R	CGAATTGGAGCTCCACCGCGGTGGCGGGGTACCAGGGCTCAGAACTG
G9a_HDVAz_5HA_F	CTGGGTACCGGGCCCCCCCTCGAGGGTGGGTTGGCTGGATGGTTGAG
G9a_HDVAz_5HA_R	GGAGGCTGGGACCATGCCGGCCATGGTCTGAAGGGCAGTGCCCG
G9a_HDVAz_checking_F1	GGATGGGGGCTAGTGTGGGTTG
G9a_HDVAz_checking_R1	CAGTTCCTTTTTCAGATCTCAACTCTTGACC
G9a_HHRz	CCCCCCATCAACACCTGAGGACTCTTAAAATCCAGGCCGGGCACTGCCCTCCTGTCACCGGATGTGTTTTCCGGTCTGATGAGTCCGTGAGGACGAAACAGGTCAGACATTTCTCCATCAGAGACCCCAGTAAGGCCTGGAAGGTCGATGGC
G9a_pCas9_F	CACCGTCTGATGGAGAAATGTCTGA
G9a_pCas9_R	AAACTCAGACATTTCTCCATCAGAC
G9a_qPCR_F	CAACAACGCACGCCACTAATG
G9a_qPCR_R	GGCTGCATGATGTAGACAGGT
HHRz_checking_R	TGTTTCGTCCTCACGGACTCATCAG
linc1251_checking_F1	CCACCTTGGCTGGTTTCAGAGG
linc1251_checking_F2	CTCTGTGATCGTCTTCTCCAAGCAGTC
linc1251_checking_R2	CCTTCTATGTAACAGGAAATGACTCCTTGATGC
linc1251_HHRz	TAGTGCTGTTGAATGATGGGTATATCCATGCAACCACTGATTAGGTCAGGCCTGTCACCGGATGTGTTTTCCGGTCTGATGAGTCCGTGAGGACGAAACAGGGCCTCCATGGCTTGCTCATCTCTCAACAGTGTCACCAGCTAGGGTCTGCT
linc1251_pCas9_F	CACCGGGAGGCCCTGACCTAATCAG
linc1251_pCas9_R	AAACCTGATTAGGTCAGGGCCTCCC
linc1251_pRRE_F	CATGGAGGCCCTGACCTAATCAGTGGTTGACGT
linc1251_pRRE_R	CAACCACTGATTAGGTCAGGGCCTCCATGAGCT
linc1251_qPCR_F1	CAGCTAGGGTCTGCTCCTTCAATACTG
linc1251_qPCR_R1	GTTCAAGCACTCTGGAGACAAGAAGGA
linc1296_checking_F1	CAGGAGATAGGTGCCATGGAGAACAG
linc1296_checking_F2	GTGGAGGTTATGTGTGCATAAGATGTCTTCC
linc1296_checking_R2	GAAAGCGGAGAAACCAGGTGAAGTC
linc1296_deletion_checking_F1	CAGTAACAATTCTGCCTCACTCCAAACTG
linc1296_deletion_checking_F2	CCCCGTCTTCCTTGGAGATGAAGAT
linc1296_deletion_checking_R1	TGCCACCATGGCTCGAGTTAGAG
linc1296_deletion_checking_R2	GGAGAAGCACATAGACTGCCCTAATCAC
linc1296_deletion_pCas9-1_F	CACCGGTAGTCAGTCAGCTTTGTGT
linc1296_deletion_pCas9-1_R	AAACACACAAAGCTGACTGACTACC
linc1296_deletion_pCas9-2_F	CACCGTGGTTTAGTTTATATCGACT
linc1296_deletion_pCas9-2_R	AAACAGTCGATATAAACTAAACCAC
linc1296_HHRz	TTCCAGTTCTCAGTGACTATCTTATTATCTCCACAGGCAGTGAACAAGACCCTGTCACCGGATGTGTTTTCCGGTCTGATGAGTCCGTGAGGACGAAACAGGGTGTGGTCTGAAGATACACAACACCGAGACAGGACTGTGTGGTGCTCACA
linc1296_pCas9_F	CACCGCAGGCAGTGAACAAGACGTG
linc1296_pCas9_R	AAACCACGTCTTGTTCACTGCCTGC
linc1296_qPCR_F1	CCACCACCACCAGCAGCAG
linc1296_qPCR_R1	GAGTAGGTGGCTCCTTCTGGTAATCC
linc1333_checking_F1	GGTTCAGGATGGAGAGGGCA
linc1333_checking_R1	CCCTATCCCTCCTCTTACTCA
linc1333_HHRz	AACAAACAAACAAACAAACAAGCAAACCAGCTACTCCTATTCCGCACTCCAAACACCAAGCCTGTCACCGGATGTGTTTTCCGGTCTGATGAGTCCGTGAGGACGAAACAGGCAGAAATGCTTCTGGGACAAACTGAGCTTCATTCTTTATGAAAATGAAAACACTTCTTTC
linc1333_qPCR_F1	GGTTCAGGATGGAGAGGGCA
linc1333_qPCR_R1	GTTTTTCCACTTCAGGCTCCT
linc1333_TALEN1_target	TCCTATTCCGCACTCCAAACAC
linc1333_TALEN2_target	TGAAGCTCAGTTTGTCCCAGA
linc1400_checking_F1	GGTTCGGTATTTCCAGAGAGCATTTTTCC
linc1400_checking_F2	GGCCAACTCTACCCTCAGCAAAGTAG
linc1400_checking_R2	GAGTCCTATTGCCATATGCTTGACATACATCC
linc1400_deletion_checking_F1	GCTTTGCCCAATTATCTGACCCACTAC
linc1400_deletion_checking_F2	GGGATGAAAGCAGCCGTCTTTGC
linc1400_deletion_checking_R1	GTCTTTGTCCCACAGGAATCCAGC
linc1400_deletion_checking_R2	GTGATGAATTCTGTGTTTTAGTTGCAGGTTCC
linc1400_deletion_pCas9-1_F	CACCGGGCAGACCTGCGTAATTAGT
linc1400_deletion_pCas9-1_R	AAACACTAATTACGCAGGTCTGCCC
linc1400_deletion_pCas9-2_F	CACCGTTCACCTTAGACATACATCC
linc1400_deletion_pCas9-2_R	AAACGGATGTATGTCTAAGGTGAAC
linc1400_HHRz	ATCCTCCCCACCTACCGAGTTTTACAGATTGTAATCTCCAACACGTTATCCCTGTCACCGGATGTGTTTTCCGGTCTGATGAGTCCGTGAGGACGAAACAGGTCGCTTTCTGCAATTTCGTGAGTACTTTGTCTTTCCCTCCACAGATTTTC
linc1400_pCas9_F	CACCGCAGAAAGCGAGATAACGTGT
linc1400_pCas9_R	AAACACACGTTATCTCGCTTTCTGC
linc1400_qPCR_F1	CACATGAAGGAACCTGCCATCAAGC
linc1400_qPCR_R1	CACATTTTCCTTAGTTTTGCTCTGTATTCTAGTTTGG
linc1405_checking_F1	AGAGCCAGAGAGATGGGGAGAGAATC
linc1405_checking_F2	GGGAGTTCTGCCTTGGAAACTTCTG
linc1405_checking_R2	CGTTCTTGCTTGTATCATCCTGTTCTCATG
linc1405_deletion_checking_F1	CTTCCCAGTACTGAGATAATAGGCATGTACC
linc1405_deletion_checking_F2	ATGCATAAGCTTCTTCTGGTAGATATATGAAACATCTGCTCATCAGG
linc1405_deletion_checking_R1	GCTGTGGGCATCTTTATTCAGCAGATAG
linc1405_deletion_checking_R2	CATGGGTGTGCCAGAAAGTCAAGTC
linc1405_deletion_pCas9-1_F	CACCGAAAGCTCGGTAGTAAGAGGT
linc1405_deletion_pCas9-1_R	AAACACCTCTTACTACCGAGCTTTC
linc1405_deletion_pCas9-2_F	CACCGTGGTTCCCCATGTATTCACC
linc1405_deletion_pCas9-2_R	AAACGGTGAATACATGGGGAACCAC
linc1405_HHRz	CTAGTTACAGTGTTTTGTTTCAGGCAGGAATTGAGTACTGATTGCAGTAGCCTGTCACCGGATGTGTTTTCCGGTCTGATGAGTCCGTGAGGACGAAACAGGCTTTGGAGGATGGATGCTCTGTCTGACTTTCTTATGATGCTCCTGGAAGA
linc1405_pCas9_F	CACCGATTGCAGTAGCTTTGGAGGA
linc1405_pCas9_R	AAACTCCTCCAAAGCTACTGCAATC
linc1405_qPCR_F1	TGCTCCTGGAAGATGAGACCCTCTAG
linc1405_qPCR_R1	CAAGCACGAATGAGATCCATCACAATCC
linc1503_checking_F1	CTCCCACAACGGGCCTTCAAC
linc1503_checking_F2	CCTCTGGTGCAGTATTTCCAGGATATTAGTG
linc1503_checking_R2	CAGATGCAAGTCAAGTCCACAGTCAAG
linc1503_deletion_checking_F1	CACCTTCCGCAGGCATCTTGC
linc1503_deletion_checking_F2	GGATCAACAGGGATCAGTGACAATGATG
linc1503_deletion_checking_R1	AGGGAAGGGCAGGTTCCAACTC
linc1503_deletion_checking_R2	GACGATGTCATCCAGTAAGTCTTAGTACTGC
linc1503_deletion_pCas9-1_F	CACCGAATGCCACAACAGACTCTAT
linc1503_deletion_pCas9-1_R	AAACATAGAGTCTGTTGTGGCATTC
linc1503_deletion_pCas9-2_F	CACCGTGAAAGTCATTGGTCAAAGT
linc1503_deletion_pCas9-2_R	AAACACTTTGACCAATGACTTTCAC
linc1503_HHRz	TTTGCTGCTGACGGAAGCCTGACCCAGCCCTGACCTCGTAGACCTTATAGCCTGTCACCGGATGTGTTTTCCGGTCTGATGAGTCCGTGAGGACGAAACAGGGAATATGTTCTCAGCTCACTGCTCCACATTTCTGGCCCTGTGACCTCACC
linc1503_pCas9_F	CACCGATATTCCTATAAGGTCTACG
linc1503_pCas9_R	AAACCGTAGACCTTATAGGAATATC
linc1503_qPCR_F1	GCTATTCATCATGGATACAGCCTCAGATCC
linc1503_qPCR_R1	CGTCAGCAGCAAAGTTAGACAGTGG
linc1509_qPCR_F1	AGGTCTTGTGAATGCTCTAATTTTTCAAAGCTTAC
linc1509_qPCR_R1	CGCCTGTATCCTAATCACCTTTCTTTTCACTAC
linc1509_site1_checking_F1	CTTGGTAAGGACCCACCAGTGGG
linc1509_site1_checking_F2	CCGTTCCTCCCTGAATTTCAGGGTTC
linc1509_site1_checking_R2	CTTTCTTCTTTTTGGTCTCTTCAAGCTGGTC
linc1509_site1_HHRz	CTTCTGTGTGACTAAGAGAAGAAGAATCAGAGTAAAGAGAAACATACTCTCTTAATCTCCCCTGTCACCGGATGTGTTTTCCGGTCTGATGAGTCCGTGAGGACGAAACAGGGAAGATTAACGGCAGGAGGAGCTCTAGAATTTCACAAAGGTGCTGTCAGGACACATGAAA
linc1509_site1_pCas9_F	CACCGTCTTAATCTCCGAAGATTAA
linc1509_site1_pCas9_R	AAACTTAATCTTCGGAGATTAAGAC
linc1509_site2_checking_F1	GTAACTCCACTGGACACCGTTCAAC
linc1509_site2_checking_F2	GTATCTCAACTGTGTGTTGCAGGTGAC
linc1509_site2_checking_R2	GTCTGAACAGGTTCACTTCGCCTG
linc1509_site2_HHRz	TTCTACGGAATATAAGTACCAGCTAAAGAGGACACACACTTGAAGAAAAAGGAGACAATGCCTGTCACCGGATGTGTTTTCCGGTCTGATGAGTCCGTGAGGACGAAACAGGAGGTCTTGTGAATGCTCTAATTTTTCAAAGCTTACTTTTAATGATGGTTCTTAAACGCTT
linc1509_site2_pCas9_F	CACCGTGAAGAAAAAGGAGACAATG
linc1509_site2_pCas9_R	AAACCATTGTCTCCTTTTTCTTCAC
linc1543_checking_F1	GCCCAGCCATATTAGCTCAGAAGATCC
linc1543_checking_F2	GAAGGGGCACTTGGTGACTAAGC
linc1543_checking_R2	GGACCCAGAACTCAGCCGTAGG
linc1543_deletion_checking_F1	CCTTTCATTCCTATTGTGTCCTGGAGTG
linc1543_deletion_checking_F2	CCCAGGCCTTTCATTCCTATTGTGTC
linc1543_deletion_checking_R1	CACACGTGTACCACACAACCCTC
linc1543_deletion_checking_R2	AGGTTTGTTGTACACAAAAGTAGACCAAAGG
linc1543_deletion_pCas9-1_F	CACCGAAGATTTCTTCCTACCGTAT
linc1543_deletion_pCas9-1_R	AAACATACGGTAGGAAGAAATCTTC
linc1543_deletion_pCas9-2_F	CACCGTATGGCCTACATCTTGAATC
linc1543_deletion_pCas9-2_R	AAACGATTCAAGATGTAGGCCATAC
linc1543_HHRz	CATTGCCTAGTCCTATACCTGTCGGGGAAATGGTAACTTCGGAACTTAGTCCTGTCACCGGATGTGTTTTCCGGTCTGATGAGTCCGTGAGGACGAAACAGGAGGCAGACAGTTTCTGGAGGTAACATAGAGACATGAAGGGGTACACTGAG
linc1543_pCas9_F	CACCGTGGTAACTTCGGAACTTAGT
linc1543_pCas9_R	AAACACTAAGTTCCGAAGTTACCAC
linc1543_qPCR_F1	GCCTCTGCCATGGAAACACGATC
linc1543_qPCR_R1	GGCTGCTTCAGGTCCCTTCAC
linc1611_checking_F1	GAGATGGATAGCAGGCAGGGTGATG
linc1611_checking_F2	CCAAAGTCAAATGTGGTCCTCAGTTTCTG
linc1611_checking_R2	CGGGATTCCAGGAAGCCGTTC
linc1611_deletion_checking_F1	TGACCCCAATAACGAGCTCTATGCTTG
linc1611_deletion_checking_F2	TGAAAGGAGGGAGCCTTGATTAAGAAAGTG
linc1611_deletion_checking_R1	CCTGCCTGGCCACCTAACATG
linc1611_deletion_checking_R2	GAACAAGCCATGTGAATACACGTGTGTC
linc1611_deletion_pCas9-1_F	CACCGCCGTTGCACATAGTTCCCAG
linc1611_deletion_pCas9-1_R	AAACCTGGGAACTATGTGCAACGGC
linc1611_deletion_pCas9-2_F	CACCGTGACTACGATTGACTTACCG
linc1611_deletion_pCas9-2_R	AAACCGGTAAGTCAATCGTAGTCAC
linc1611_HHRz	ATCCGACATTCACCACTTTGTCTTTGACCCAGGTTCTGCCCTCAACAGACCCTGTCACCGGATGTGTTTTCCGGTCTGATGAGTCCGTGAGGACGAAACAGGCATCTGTTAGGAAGGGACCTTAAATCTCCAAGAAAGGAAGTCTCTAGAGA
linc1611_pCas9_F	CACCGCCTAACAGATGGTCTGTTGA
linc1611_pCas9_R	AAACTCAACAGACCATCTGTTAGGC
linc1611_qPCR_F1	TCTCTAGAGATAGGACATTCCATTCTGTTGGAG
linc1611_qPCR_R1	GCTGCAGAGCTGACAGCTCAC
lncEnc1_checking_F1/F2	TGGCAAATGACGGTGTTTCT
lncEnc1_checking_R2	TTGATAGCTCCCTCTTTGCCC
lncEnc1_deletion_checking_F1	CCTTAGCCTGCCATGCACACAG
lncEnc1_deletion_checking_F2	GCTGTCTGGGGGTAAAATGTGACATTTC
lncEnc1_deletion_checking_R1	GCACACCTTGGAGAGGATGTTGG
lncEnc1_deletion_checking_R2	CCCTGCAGTTCCCTCCTCCG
lncEnc1_deletion_pCas9-1_F	CACCGTCATGTCAGGGAGAATAGGT
lncEnc1_deletion_pCas9-1_R	AAACACCTATTCTCCCTGACATGAC
lncEnc1_deletion_pCas9-2_F	CACCGGGCCTACTAGTGAGGGATCA
lncEnc1_deletion_pCas9-2_R	AAACTGATCCCTCACTAGTAGGCCC
lncEnc1_HHRz	TTGATTTCTTGATTTCTTGATTTAAAAGAATGAGTCTCTGCATAAGGCTTGCCTAGGCCACCTGTCACCGGATGTGTTTTCCGGTCTGATGAGTCCGTGAGGACGAAACAGGTCAGCTACAAGCTTCACTGGACAGTGTACAGACAGCATAGAGTTGGCTTCATACTAGGGA
lncEnc1_qPCR_F1	ACCCTATAATCCACCTGCCT
lncEnc1_qPCR_R1	CAAAGAGGTAGGTGGGCAGAA
lncEnc1_TALEN1_target	TGAGTCTCTGCATAAGGCTTGC
lncEnc1_TALEN2_target	TGTACACTGTCCAGTGAAGCTT
Miat_deletion_checking_F1	GGCCCAAGGGCCATCTTATGC
Miat_deletion_checking_F2	GTGAGCTAGCTTATTGAAGAGAACAGCTTG
Miat_deletion_checking_R1	TCCAGGAAGCCCTGCTTCATGG
Miat_deletion_checking_R2	CCTGTGCTAGAACATTCCACCTACTAGTC
Miat_deletion_pCas9-1_F	CACCGCCCCTACTTAACCCGCTGAC
Miat_deletion_pCas9-1_R	AAACGTCAGCGGGTTAAGTAGGGGC
Miat_deletion_pCas9-2_F	CACCGGGTTTGGGTAGAGTCAACCC
Miat_deletion_pCas9-2_R	AAACGGGTTGACTCTACCCAAACCC
Miat_qPCR_F	TGGCCTTCCTTGGGACAGTCTAG
Miat_qPCR_R	CCGCTGGCACCTTGGTCTTG
Mtr4_1xFlagAvi	TGGGTAGGAGGGAGATTCGGTCTCAGAGTTCCGAAAGATGGACTACAAAGACGATGACGATAAAGGTGATGGGTCCGGCCTGAACGACATCTTCGAGGCTCAGAAAATCGAATGGCACGAAGGCGCGCCGAGCTCGAGGGCGGATGCTTTCGGGGATGAGCTTTTCAGCGTTTTCGAGG
Mtr4_3xFlagAvi	TGGGTAGGAGGGAGATTCGGTCTCAGAGTTCCGAAAGATGGACTATAAGGACCACGACGGAGACTACAAGGATCATGATATTGATTACAAAGACGATGACGATAAGGCTGGCCTGAACGACATCTTCGAGGCTCAGAAAATCGAATGGCACGAAGGTCCTGCGGATGCTTTCGGGGATGAGCTTTTCAGCGTTTTCGAGG
Mtr4_TALEN1_target	CTCAGAGTTCCGAAAGAT
Mtr4_TALEN2_target	GAAAAGCTCATCCC
Pvt1_checking_F1	GGGAAGACAGGTGACTGCCTACC
Pvt1_checking_F2	CTACTGTAGTCTGTGATTGTGCCAAAGTG
Pvt1_checking_R2	CACTGCATTGAAAGGAGATGGGTCTTAGG
Pvt1_deletion_checking_F1	CCGAAAAGTGGGAAGACTGCTAAGC
Pvt1_deletion_checking_F2	AGTGGGAAGACTGCTAAGCTTCAAGG
Pvt1_deletion_checking_R1	CAAACATCTGGTCCCGTGGTGTTC
Pvt1_deletion_checking_R2	GTCCCCGATCTCCTGGTGTCTG
Pvt1_deletion_pCas9-1_F	CACCGGTGGGACCTATGTAGGACCT
Pvt1_deletion_pCas9-1_R	AAACAGGTCCTACATAGGTCCCACC
Pvt1_deletion_pCas9-2_F	CACCGTCTGAGACTTAGTGTATACC
Pvt1_deletion_pCas9-2_R	AAACGGTATACACTAAGTCTCAGAC
Pvt1_HHRz	CCGTGTCTGCTGGGACCTCTCTGGAGACTTCCTGAACCCTGTGGATTTACCCTGTCACCGGATGTGTTTTCCGGTCTGATGAGTCCGTGAGGACGAAACAGGAGTAAGATGCAGTTTCCTGGGGAGTAATTCTGGTGGATACAAATTCCGGA
Pvt1_pCas9_F	CACCGCATCTTACTGTAAATCCACA
Pvt1_pCas9_R	AAACTGTGGATTTACAGTAAGATGC
Pvt1_qPCR_F1	CTTAACTCTACTACGGTAAGAAGATGCCCTC
Pvt1_qPCR_R1	GTAAATCCACAGGGTTCAGGAAGTCTCC
Pvt1_site2_checking_F1	CGCGCTCTACCAGGCAGAG
Pvt1_site2_checking_F2	CCGAGCACATGGACCCACTG
Pvt1_site2_checking_R2	CTCTGGCAATCTCGAGTCTAGTGATGAG
Pvt1_site2_HHRz	TGGAAAGGATGTTGGCAGCCCCGGTGACCTCGGAGTCACGGCTGGATCCACCTGTCACCGGATGTGTTTTCCGGTCTGATGAGTCCGTGAGGACGAAACAGGCCCTCTTGTAAGTTCCAAGTTTATCCCCTGGAAACTCTGGAGCCCAGGGA
Pvt1_site2_pCas9_F	CACCGACTTGGAACTTACAAGAGGG
Pvt1_site2_pCas9_R	AAACCCCTCTTGTAAGTTCCAAGTC
Tuna_deletion_checking_F1	GGCCTGAGAGGCCGCAAATCC
Tuna_deletion_checking_F2	GTTCTTAGCTATGACCTTCGGGGATGAC
Tuna_deletion_checking_R1	CCTGAAAGCCACTGGGGCTTG
Tuna_deletion_checking_R2	CTCATCATGGAAGCTCTGGACTATCTCAC
Tuna_deletion_pCas9-1_F	CACCGACCAGGTGTCTAGTTTCAGG
Tuna_deletion_pCas9-1_R	AAACCCTGAAACTAGACACCTGGTC
Tuna_deletion_pCas9-2_F	CACCGCAAACTGTAATTCTGCACAG
Tuna_deletion_pCas9-2_R	AAACCTGTGCAGAATTACAGTTTGC
Tuna_qPCR_F1	AGTCACCAGCTCAAGTGCAG
Tuna_qPCR_R1	CCCGTTTCCATCTCTCATGGT
Tuna_site1_checking_F1	TGGATGTCACTTCCACCCATGATGTAG
Tuna_site1_checking_F2	GGATGCTGGGAAATGATCCATCTTTCG
Tuna_site1_checking_R2	GAGGTCTGAATGGGGCCTTTCATAGAG
Tuna_site1_HHRz	ACTACAGGTTAGCCTGGAGAGGAAGATAAAGACATTTGCAACCAAGATGGTAATCACGAGCCTGTCACCGGATGTGTTTTCCGGTCTGATGAGTCCGTGAGGACGAAACAGGTGGAAACGATGAAGACCGGGGAGGCCAAGAGAAAGAGAGCAAAGAGGAGAGCGTGTTGGC
Tuna_site1_pCas9_F	CACCGACCAAGATGGTAATCACGAG
Tuna_site1_pCas9_R	AAACCTCGTGATTACCATCTTGGTC
Tuna_site2_checking_F1	GGGCATTGGGAGGGGACTTAATGG
Tuna_site2_checking_F2	GGTCCGCATTCATTCTGCCAAGG
Tuna_site2_checking_R2	CTTGTGTACACGGTATCTGTCCTTCTGG
Tuna_site2_HHRz	TCTCAGCTTGCCCCCTTCCTTAAATGGCACCATGAAGGAGTCATTTCTTGGGCTTCACTACCTGTCACCGGATGTGTTTTCCGGTCTGATGAGTCCGTGAGGACGAAACAGGAGGGACCAGTCTCTTTTATAAATCAAATACCCATGAGCACCTGGCTCTGCCCAGAGATGT
Tuna_site2_pCas9_F	CACCGTCATTTCTTGGGCTTCACTA
Tuna_site2_pCas9_R	AAACTAGTGAAGCCCAAGAAATGAC
XLOC_021390_checking_F1	CAGTTTCCTTAGACTTAGAGAATTCCAGTCTCTC
XLOC_021390_checking_F2	GCCCAGGCAAGCTCAGAAACC
XLOC_021390_checking_R2	GCATCTTTAATCCATGACTGTAGCTGAGTAGTC
XLOC_021390_HHRz	TCAGAAACCCAGCTTCAAAGGTGGCTTCATTCAAAAACCCTCCAATTGAGCCTGTCACCGGATGTGTTTTCCGGTCTGATGAGTCCGTGAGGACGAAACAGGGACCAGGACTGTTCGCATTATCCATCATGGGATCTGGTCCAGGCCAGTGC
XLOC_021390_pCas9_F	CACCGAGTCCTGGTCCTCAATTGGA
XLOC_021390_pCas9_R	AAACTCCAATTGAGGACCAGGACTC
XLOC_021390_qPCR_F1	TGGTAAACTCCCCTACCTCTGAGTCATC
XLOC_021390_qPCR_R1	CCTGGGCAGCGTCTGTTTGTC
XLOC_023934_checking_F1	CACCTTCCTGCTGCTCTGTCACTATG
XLOC_023934_checking_F2	AGCACGTTGACAAGTGTTTGGAATCC
XLOC_023934_checking_R2	GCCTGTCTCTAGGTGTTCAGAGAAATCC
XLOC_023934_HHRz	TAATTTTCCAGGTTTCTCTGGAGTTACAACCTGCTTAAGTTGTGCAAATGCCTGTCACCGGATGTGTTTTCCGGTCTGATGAGTCCGTGAGGACGAAACAGGCTCACGCAAAGGAAGCAGACTTATGTTAGTCATTTCTATAATCCTGTTGA
XLOC_023934_pCas9_F	CACCGTTGTGCAAATGCTCACGCAA
XLOC_023934_pCas9_R	AAACTTGCGTGAGCATTTGCACAAC
XLOC_023934_qPCR_F1	GAACTTGCTACAGTAACATGGGTCAGAAG
XLOC_023934_qPCR_R1	CAGGTTGTAACTCCAGAGAAACCTGGA
